# Supplementary material for: Transcriptome and Small RNA Sequencing Reveals the Basis of Response to Salinity, Alkalinity and Hypertonia in Quinoa (Chenopodium quinoa Willd.)
Source: MDPI journal article supplement (doi:10.3390/ijms241411789), 2023-07-22
Supplement: s1 [file s1]

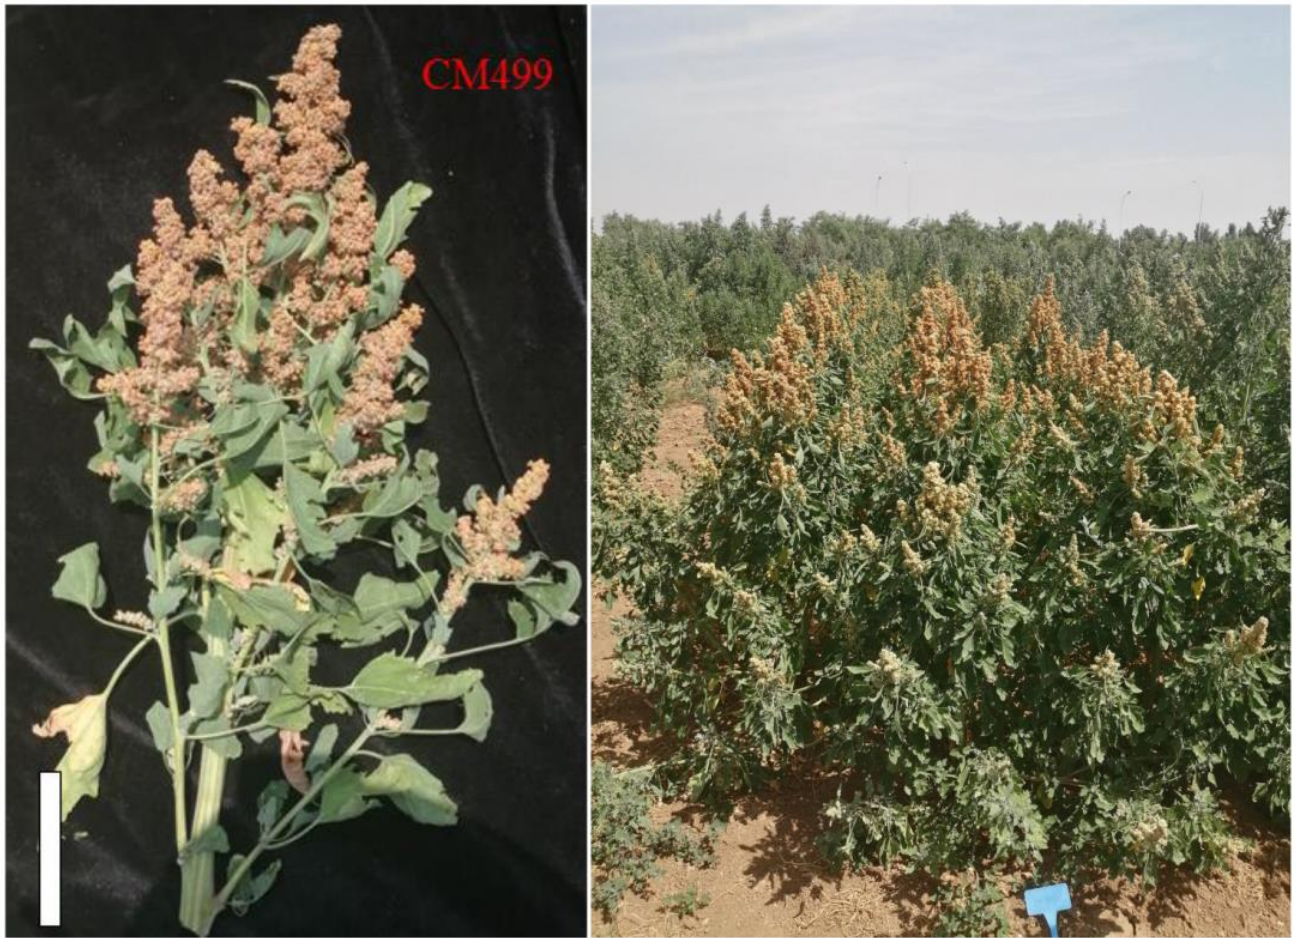

**Figure S1.** Field phenotype of CM499. It was planted in Zhoucun District, Shandong Province, East China. Bar stood for 10 cm.

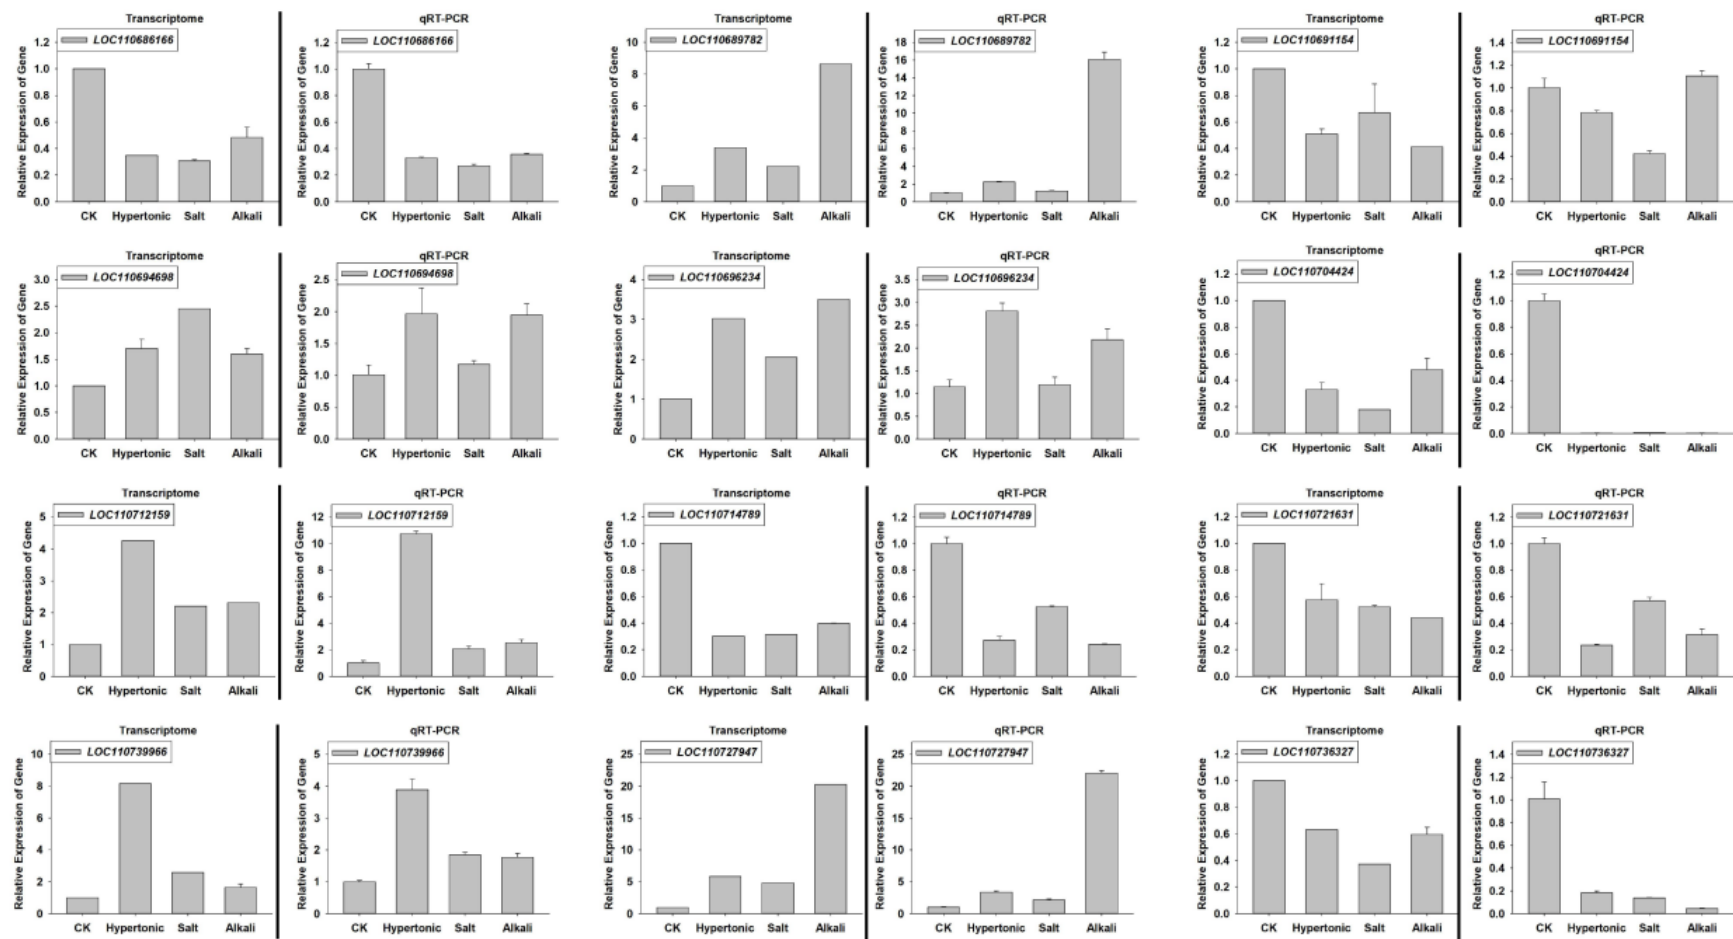

**Figure S2.** Expression analysis of quinoa genes via qRT-PCR.

### Saline&Alkaline:

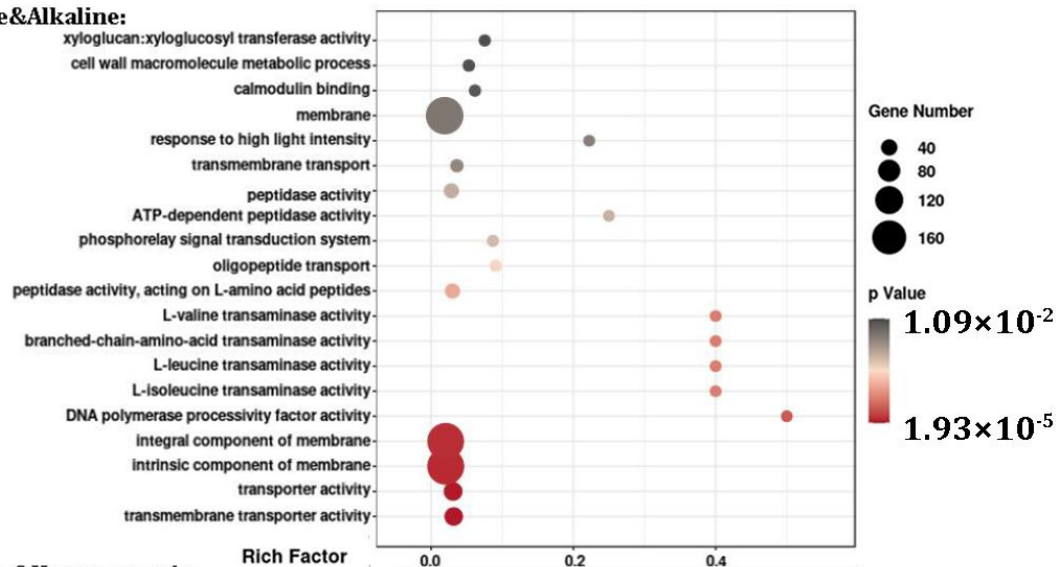

### Saline&Hyperosmotic:

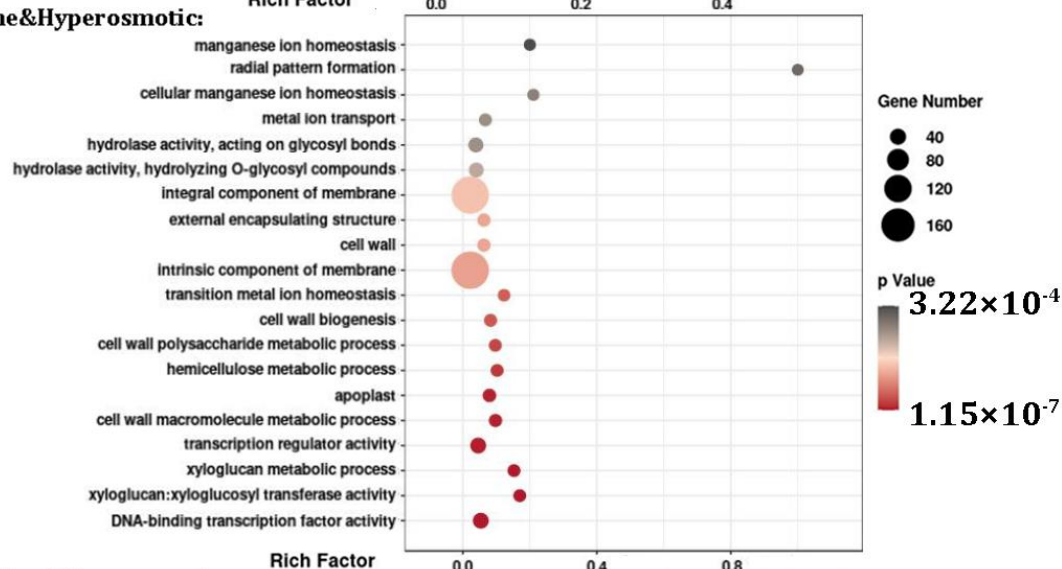

### Alkaline&Hyperosmotic:

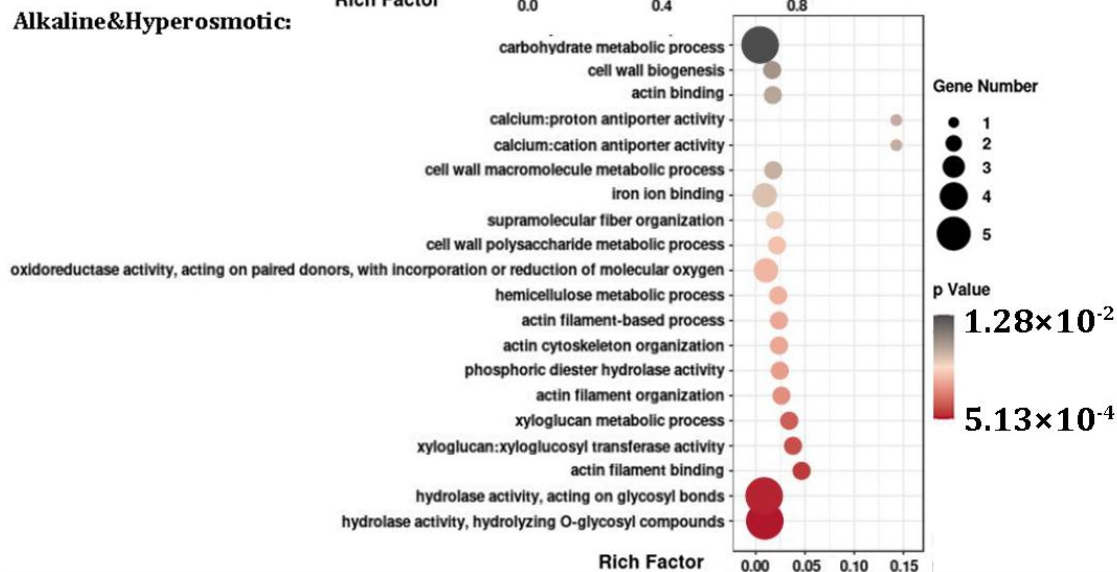

**Figure S3.** GO enrichment analysis of DEGs responded to double stresses.

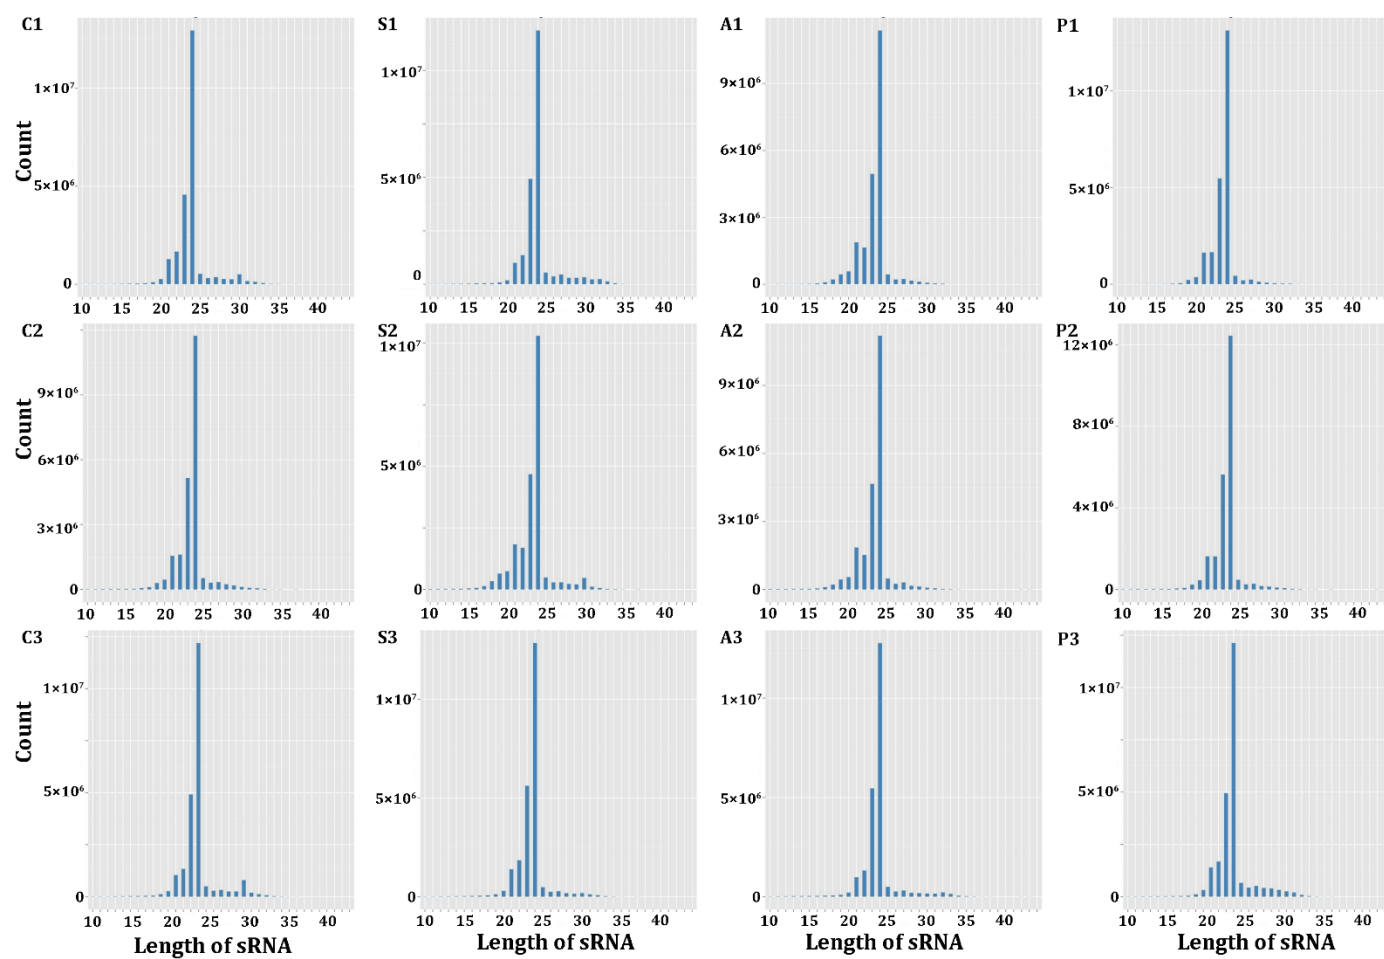

**Figure S4.** Length distribution of reads in small RNA sequencing.



### Saline&Alkaline:

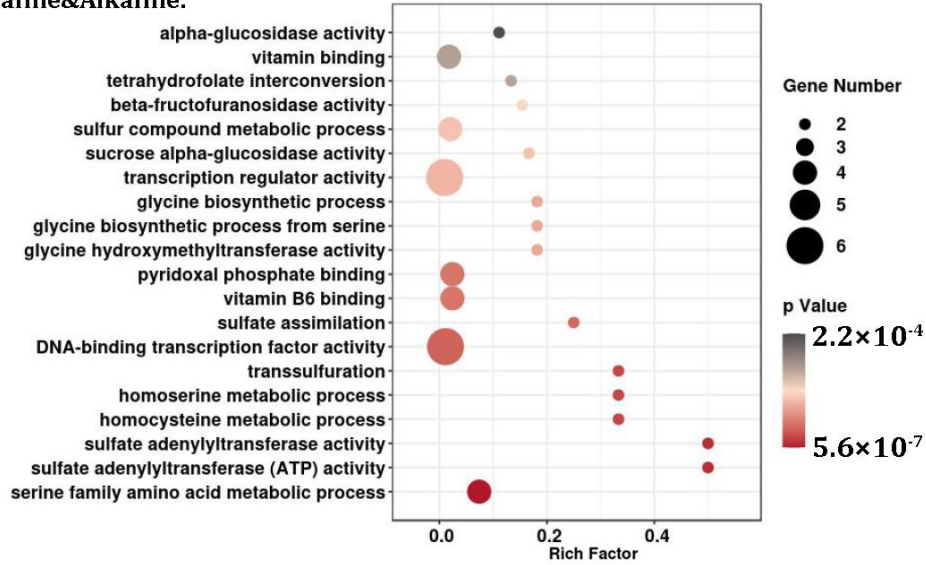

### Saline&Hyperosmotic:

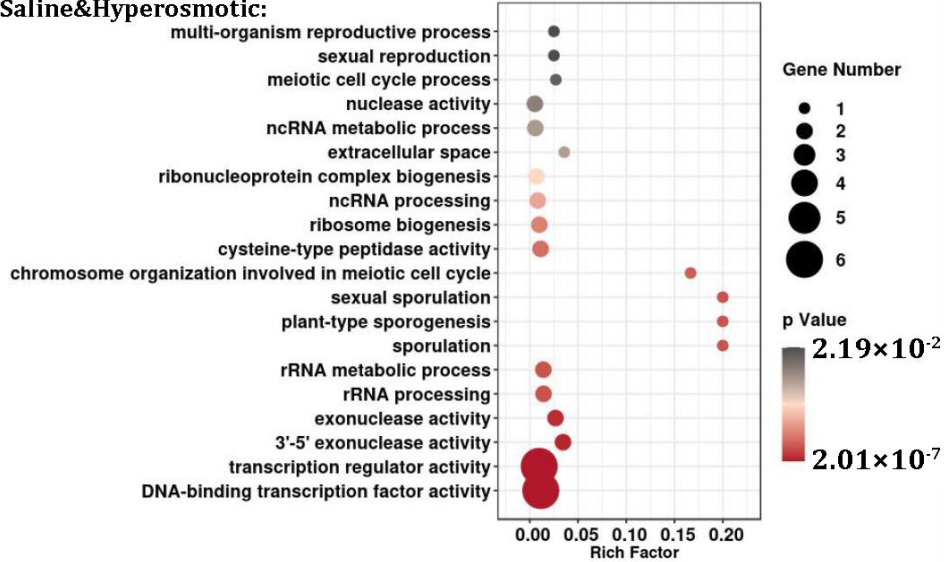

### Alkaline&Hyperosmotic:

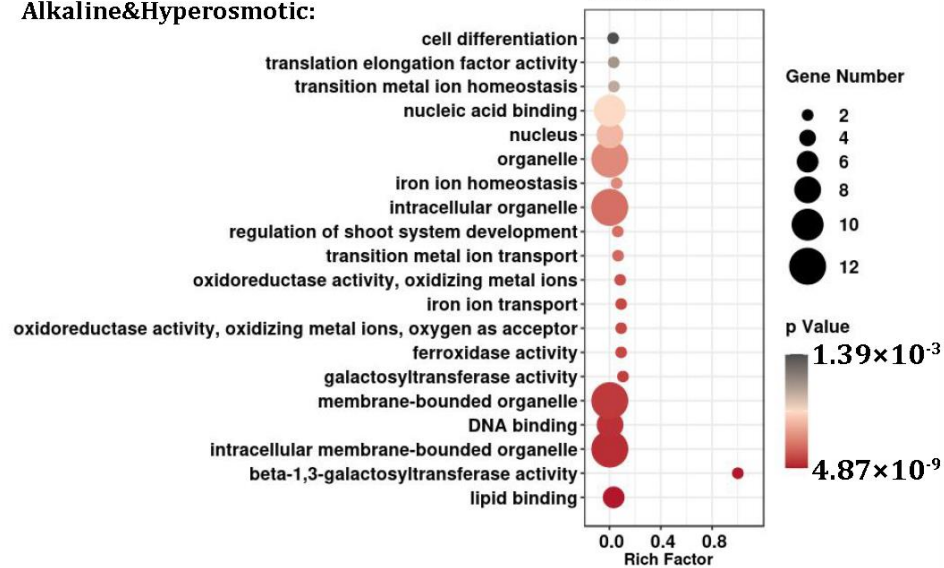

**Figure S5.** GO enrichment analysis of DEM targets responded to double stresses.
