# Supplementary material for: Transcriptome and Small RNA Sequencing Reveals the Basis of Response to Salinity, Alkalinity and Hypertonia in Quinoa (Chenopodium quinoa Willd.)
Source: Int J Mol Sci. 2023 Jul 22;24(14):11789. doi: 10.3390/ijms241411789 (PMC10380837; doi:10.3390/ijms241411789)
Supplement: Supplementary file 1 [file ijms-24-11789-s001.zip]

Archive with 12 entries (12 files):
- Supplement information Han et al. revised.pdf
- Tab.S1 Statistical analysis of sequencing reads.tif
- Tab.S10 The gene ID of miRNA targets belonging to the seven DEM groups.xls
- Tab.S11 Primer list.xls
- Tab.S2 Quinoa gene identification.xls
- Tab.S3 Differential expression of quinoa genes.xls
- Tab.S4 GO and KEGG annotation of quinoa genes.xls
- Tab.S5 Small RNA sequence data statistics.xls
- Tab.S6 Identification of miRNA in quinoa.xls
- Tab.S7 Sicientific name for abbreviation.xls
- Tab.S8 Differential expression of miRNA.xls
- Tab.S9 Predicted targets of miRNA.xls
