# Supplementary material for: Transcriptome and Small RNA Sequencing Reveals the Basis of Response to Salinity, Alkalinity and Hypertonia in Quinoa (Chenopodium quinoa Willd.)
Source: Int J Mol Sci. 2023 Jul 22;24(14):11789. doi: 10.3390/ijms241411789 (PMC10380837; doi:10.3390/ijms241411789)
Supplement: Supplementary file 1 [file ijms-24-11789-s001.zip › Tab.S2 Quinoa gene identification.xls]

## Sheet: sheet1
gene_id	gene_transcript_id	gene_type	gene_transcript_number	gene_start	gene_end	gene_chromatin	gene_strand	gene_length	max_transcript_length	description_nr
LOC110740337	XM_021857740.1	Known_gene	1	3272907	3277208	NW_018743555.1	-	4302	1174	XP_021713432.1|5.6e-129|ran-binding protein 1 homolog c-like [Chenopodium quinoa]
LOC110740336	XM_021920827.1	Known_gene	1	3237787	3242428	NW_018743555.1	-	4642	3325	XP_021776519.1|0.0e+00|probable serine/threonine-protein kinase WNK9 [Chenopodium quinoa]
LOC110740335	XM_021920825.1,XM_021920826.1	Known_gene	2	3229759	3234505	NW_018743555.1	-	4747	2756	XP_021746067.1|0.0e+00|potassium transporter 1-like [Chenopodium quinoa]
LOC110740334	XM_021857739.1	Known_gene	1	2706388	2709470	NW_018742244.1	+	3083	3083	XP_021713431.1|0.0e+00|lysine-specific histone demethylase 1 homolog 1-like [Chenopodium quinoa]
LOC110740333	XM_021920824.1	Known_gene	1	3191651	3200277	NW_018743555.1	-	8627	1805	XP_010689413.1|1.1e-200|PREDICTED: mitogen-activated protein kinase homolog NTF6 [Beta vulgaris subsp. vulgaris]
LOC110740332	XM_021920823.1	Known_gene	1	3144213	3147029	NW_018743555.1	+	2817	1369	XP_021776514.1|1.3e-169|NDR1/HIN1-like protein 13 [Chenopodium quinoa]
LOC110740330	XM_021920822.1	Known_gene	1	3122977	3125897	NW_018743555.1	+	2921	1475	XP_021776514.1|1.4e-169|NDR1/HIN1-like protein 13 [Chenopodium quinoa]
LOC110740329	XM_021920817.1,XM_021920819.1,XM_021920820.1,XM_021920821.1,XM_021920816.1	Known_gene	5	3117872	3121715	NW_018743555.1	+	3844	1521	XP_021776508.1|1.5e-137|NEDD8-specific protease 1-like isoform X1 [Chenopodium quinoa]
LOC110740328	BGI_novel_T005913,XM_021920815.1	Known_gene	2	2915725	2920784	NW_018743555.1	-	5060	982	RHN66621.1|9.4e-79|putative EF-hand domain pair protein [Medicago truncatula]
LOC110740327	XM_021920818.1	Known_gene	1	2675359	2679472	NW_018742244.1	-	4114	1734	XP_021776510.1|1.1e-287|7-deoxyloganetin glucosyltransferase-like [Chenopodium quinoa]
LOC110740326	XM_021920814.1,XM_021920813.1,BGI_novel_T005912	Known_gene	3	2907502	2918183	NW_018743555.1	+	10682	3191	XP_021776506.1|8.1e-147|SNF1-related protein kinase regulatory subunit beta-1-like isoform X2 [Chenopodium quinoa]
LOC110740325	XM_021920812.1	Known_gene	1	2826181	2838256	NW_018743555.1	+	12076	2127	XP_021776504.1|0.0e+00|L-ascorbate oxidase-like [Chenopodium quinoa]
LOC110740324	XM_021920810.1,XM_021920811.1,XM_021920809.1	Known_gene	3	2759696	2763187	NW_018743555.1	+	3492	2194	XP_021776501.1|1.2e-161|uncharacterized protein LOC110740324 [Chenopodium quinoa]
LOC110740323	XM_021920808.1	Known_gene	1	2652586	2659703	NW_018743555.1	+	7118	3324	XP_021849470.1|0.0e+00|protein argonaute 4B-like [Spinacia oleracea]
LOC110740320	XM_021920806.1	Known_gene	1	2514411	2529097	NW_018743555.1	-	14687	3841	XP_021776498.1|0.0e+00|la-related protein 1A-like [Chenopodium quinoa]
LOC110740319	XM_021920805.1	Known_gene	1	2497646	2512334	NW_018743555.1	-	14689	2613	XP_010689355.1|0.0e+00|PREDICTED: subtilisin-like protease SBT5.3 [Beta vulgaris subsp. vulgaris]
LOC110740317	BGI_novel_T000595,BGI_novel_T000596,XM_021920807.1	Known_gene	3	2658575	2675154	NW_018742244.1	+	16580	4795	XP_021776499.1|0.0e+00|uncharacterized protein LOC110740317 [Chenopodium quinoa]
LOC110740316	XM_021920804.1	Known_gene	1	2400452	2415478	NW_018743555.1	-	15027	4222	XP_021746112.1|0.0e+00|uncharacterized protein LOC110711982 [Chenopodium quinoa]
LOC110740315	XM_021920803.1	Known_gene	1	2378226	2391979	NW_018743555.1	+	13754	3460	XP_021776495.1|0.0e+00|flowering time control protein FPA-like [Chenopodium quinoa]
LOC110740313	XM_021920802.1	Known_gene	1	2302996	2307308	NW_018743555.1	-	4313	1956	XP_021776494.1|1.3e-292|glucose-1-phosphate adenylyltransferase small subunit, chloroplastic/amyloplastic [Chenopodium quinoa]
LOC110740312	XM_021920799.1,XM_021920801.1	Known_gene	2	2294043	2301555	NW_018743555.1	+	7513	4063	XP_021776491.1|0.0e+00|uncharacterized protein LOC110740312 isoform X1 [Chenopodium quinoa]
LOC110740311	XM_021920798.1	Known_gene	1	2186102	2190624	NW_018743555.1	+	4523	2536	XP_010676489.1|2.0e-288|PREDICTED: L-ascorbate oxidase homolog [Beta vulgaris subsp. vulgaris]
LOC110740309	XM_021920800.1	Known_gene	1	2637848	2638609	NW_018742244.1	+	762	673	XP_021739435.1|8.5e-122|uncharacterized protein LOC110705811 [Chenopodium quinoa]
LOC110740308	XM_021920797.1	Known_gene	1	2136402	2141790	NW_018743555.1	-	5389	1124	XP_021776489.1|9.6e-110|uncharacterized protein LOC110740308 [Chenopodium quinoa]
LOC110740307	XM_021920796.1	Known_gene	1	2116521	2120810	NW_018743555.1	+	4290	2591	XP_021746133.1|2.5e-129|probable E3 ubiquitin-protein ligase HIP1 [Chenopodium quinoa]
LOC110740306	XM_021920795.1,BGI_novel_T005906,BGI_novel_T005907	Known_gene	3	2102097	2105328	NW_018743555.1	-	3232	2726	XP_021776487.1|0.0e+00|transmembrane 9 superfamily member 12-like [Chenopodium quinoa]
LOC110740305	XM_021920794.1	Known_gene	1	2094822	2100737	NW_018743555.1	+	5916	1261	XP_021776486.1|3.2e-114|B-cell receptor-associated protein 31-like [Chenopodium quinoa]
LOC110740304	XM_021920793.1	Known_gene	1	1955196	1960827	NW_018743555.1	+	5632	1387	XP_021776485.1|1.0e-161|succinate dehydrogenase [ubiquinone] iron-sulfur subunit 2, mitochondrial-like [Chenopodium quinoa]
LOC110740303	XM_021920790.1,XM_021920791.1,XM_021920792.1	Known_gene	3	1798174	1809501	NW_018743555.1	-	11328	1646	XP_021776482.1|1.2e-254|CBL-interacting protein kinase 32-like [Chenopodium quinoa]
LOC110740302	XM_021920788.1	Known_gene	1	1760371	1782040	NW_018743555.1	+	21670	1800	XP_021776480.1|2.2e-233|traB domain-containing protein-like [Chenopodium quinoa]
LOC110740301	XM_021920789.1	Known_gene	1	2629822	2632776	NW_018742244.1	+	2955	1102	XP_021753210.1|3.8e-111|DNA-directed RNA polymerases II and IV subunit 5A-like [Chenopodium quinoa]
LOC110740300	XM_021920786.1,XM_021920782.1,BGI_novel_T005904,BGI_novel_T005905,XM_021920783.1,XM_021920784.1,XM_021920787.1,XM_021920785.1	Known_gene	8	1681174	1705033	NW_018743555.1	-	23860	2864	XP_021776474.1|2.9e-236|zinc finger CCCH domain-containing protein 13-like isoform X1 [Chenopodium quinoa]
LOC110740299	XM_021920781.1	Known_gene	1	1474997	1484953	NW_018743555.1	-	9957	1533	XP_021776473.1|2.7e-147|peroxisome biogenesis protein 22-like [Chenopodium quinoa]
LOC110740298	XM_021920779.1,XM_021920780.1	Known_gene	2	1462299	1473674	NW_018743555.1	+	11376	2155	XP_021776471.1|8.1e-243|zinc finger protein CONSTANS-LIKE 10-like [Chenopodium quinoa]
LOC110740297	XM_021920778.1	Known_gene	1	1310730	1321602	NW_018743555.1	-	10873	3366	XP_021776470.1|0.0e+00|exocyst complex component EXO84C-like [Chenopodium quinoa]
LOC110740296	XM_021920777.1	Known_gene	1	1303494	1306112	NW_018743555.1	-	2619	968	XP_021776469.1|3.7e-94|uncharacterized protein LOC110740296 [Chenopodium quinoa]
LOC110740295	XM_021920775.1	Known_gene	1	1289802	1294928	NW_018743555.1	+	5127	1485	XP_021776467.1|3.6e-88|transmembrane protein 97-like [Chenopodium quinoa]
LOC110740294	XM_021920776.1	Known_gene	1	2621358	2623208	NW_018742244.1	+	1851	1460	XP_021776468.1|3.9e-212|uncharacterized protein LOC110740294 [Chenopodium quinoa]
LOC110740293	XM_021920772.1,XM_021920774.1,XM_021920773.1	Known_gene	3	1274730	1281886	NW_018743555.1	+	7157	3531	XP_021776464.1|0.0e+00|glutamate receptor 3.4-like [Chenopodium quinoa]
LOC110740291	XM_021920771.1	Known_gene	1	1169236	1171515	NW_018743555.1	+	2280	921	XP_021776463.1|3.5e-102|60S ribosomal protein L9-like [Chenopodium quinoa]
LOC110740290	XM_021920770.1	Known_gene	1	1078903	1082239	NW_018743555.1	-	3337	985	XP_021776462.1|5.2e-120|50S ribosomal protein L6, chloroplastic [Chenopodium quinoa]
LOC110740289	XM_021920769.1	Known_gene	1	1057388	1074328	NW_018743555.1	+	16941	3244	XP_021776461.1|0.0e+00|DNA repair protein RAD16-like [Chenopodium quinoa]
LOC110740287	XM_021920768.1	Known_gene	1	823093	830760	NW_018743555.1	-	7668	3528	XP_021776460.1|0.0e+00|uncharacterized protein LOC110740287 [Chenopodium quinoa]
LOC110740286	XM_021920765.1,XM_021920767.1	Known_gene	2	574014	588785	NW_018743555.1	-	14772	2588	XP_021776457.1|0.0e+00|carboxyl-terminal-processing peptidase 2, chloroplastic-like isoform X1 [Chenopodium quinoa]
LOC110740285	XM_021920764.1,XM_021920763.1	Known_gene	2	372206	373723	NW_018743555.1	+	1518	1296	XP_021864128.1|1.6e-148|uncharacterized protein LOC110802979 [Spinacia oleracea]
LOC110740284	BGI_novel_T005895,XM_021920762.1	Known_gene	2	373839	381793	NW_018743555.1	+	7955	6395	XP_021776454.1|9.7e-173|uncharacterized protein LOC110740284 [Chenopodium quinoa]
LOC110740283	XM_021920766.1	Known_gene	1	2623289	2628408	NW_018742244.1	-	5120	1959	XP_021776458.1|1.4e-225|metacaspase-1-like [Chenopodium quinoa]
LOC110740282	XM_021920761.1	Known_gene	1	375312	378431	NW_018743555.1	+	3120	1585	XP_021776453.1|1.3e-282|ATP-dependent DNA helicase PIF1-like [Chenopodium quinoa]
LOC110740281	XM_021920760.1	Known_gene	1	357306	360311	NW_018743555.1	+	3006	1713	XP_021776452.1|2.3e-187|uncharacterized protein LOC110740281 [Chenopodium quinoa]
LOC110740279	XM_021920759.1,XM_021920758.1,XM_021920756.1,XM_021920755.1,BGI_novel_T005893,BGI_novel_T005894	Known_gene	6	291425	306426	NW_018743555.1	+	15002	2867	XP_021764077.1|1.5e-129|uncharacterized protein LOC110728739 [Chenopodium quinoa]
LOC110740278	XM_021920754.1	Known_gene	1	253378	259168	NW_018743555.1	-	5791	1366	XP_021776446.1|5.7e-157|protein THYLAKOID FORMATION1, chloroplastic-like [Chenopodium quinoa]
LOC110740277	XM_021920757.1	Known_gene	1	2607902	2617695	NW_018742244.1	+	9794	2552	XP_021776449.1|0.0e+00|outer envelope protein 64, mitochondrial-like [Chenopodium quinoa]
LOC110740272	XM_021920753.1	Known_gene	1	3622551	3627352	NW_018743555.1	+	4802	644	XP_021776445.1|2.2e-90|uncharacterized protein LOC110740272 [Chenopodium quinoa]
LOC110740271	XM_021920752.1	Known_gene	1	3541999	3542691	NW_018743555.1	-	693	693	XP_021776444.1|3.4e-126|uncharacterized protein LOC110740271 [Chenopodium quinoa]
LOC110740270	XM_021920751.1	Known_gene	1	3493178	3494276	NW_018743555.1	-	1099	855	XP_021776443.1|9.7e-163|uncharacterized protein LOC110740270 [Chenopodium quinoa]
LOC110740269	XM_021920749.1	Known_gene	1	3330526	3332011	NW_018743555.1	+	1486	1260	XP_021776441.1|9.3e-247|protein FAR-RED IMPAIRED RESPONSE 1-like [Chenopodium quinoa]
LOC110740268	XM_021920748.1	Known_gene	1	3328626	3330456	NW_018743555.1	+	1831	1164	XP_021776440.1|7.3e-230|protein FAR1-RELATED SEQUENCE 8-like [Chenopodium quinoa]
LOC110740267	XM_021920747.1	Known_gene	1	3286212	3287318	NW_018743555.1	+	1107	945	XP_021776439.1|4.2e-183|uncharacterized protein LOC110740267 [Chenopodium quinoa]
LOC110740266	BGI_novel_T000594,XM_021920750.1	Known_gene	2	2599061	2602337	NW_018742244.1	-	3277	2828	XP_021776442.1|0.0e+00|LEAF RUST 10 DISEASE-RESISTANCE LOCUS RECEPTOR-LIKE PROTEIN KINASE-like 1.1 [Chenopodium quinoa]
LOC110740264	XM_021920746.1	Known_gene	1	2763659	2765313	NW_018743555.1	-	1655	1553	XP_021776438.1|9.8e-206|uncharacterized protein LOC110740264 [Chenopodium quinoa]
LOC110740262	XM_021920745.1	Known_gene	1	2471556	2473252	NW_018743555.1	+	1697	720	XP_021776437.1|1.6e-102|uncharacterized protein LOC110740262 [Chenopodium quinoa]
LOC110740260	XM_021920744.1	Known_gene	1	1308765	1310021	NW_018743555.1	+	1257	1257	XP_021776436.1|3.5e-185|uncharacterized protein LOC110740260 [Chenopodium quinoa]
LOC110740255	BGI_novel_T005877,XM_021920742.1	Known_gene	2	15582	120753	NW_018743548.1	+	105172	1291	XP_021776434.1|3.0e-232|piRNA biogenesis protein EXD1-like [Chenopodium quinoa]
LOC110740254	XM_021920743.1	Known_gene	1	2595547	2598881	NW_018742244.1	-	3335	3252	XP_021776435.1|0.0e+00|putative pentatricopeptide repeat-containing protein At3g47840 [Chenopodium quinoa]
LOC110740253	XM_021920741.1,XM_021920740.1	Known_gene	2	483085	493673	NW_018743548.1	-	10589	1096	XP_021776432.1|2.2e-82|histidine-containing phosphotransfer protein 4-like isoform X1 [Chenopodium quinoa]
LOC110740252	XM_021920738.1,BGI_novel_T005890,XM_021920739.1	Known_gene	3	466333	471088	NW_018743548.1	-	4756	2777	XP_021776430.1|6.3e-258|phosphatidylinositol N-acetylglucosaminyltransferase subunit A-like [Chenopodium quinoa]
LOC110740251	XM_021920737.1	Known_gene	1	446769	453175	NW_018743548.1	-	6407	1804	XP_021739117.1|1.2e-239|amino acid permease 8-like [Chenopodium quinoa]
LOC110740250	XM_021920736.1	Known_gene	1	438213	442334	NW_018743548.1	-	4122	1901	XP_021847746.1|2.0e-237|amino acid permease 4-like [Spinacia oleracea]
LOC110740249	XM_021920735.1	Known_gene	1	430207	435055	NW_018743548.1	-	4849	1646	XP_021847742.1|1.6e-243|amino acid permease 6-like [Spinacia oleracea]
LOC110740247	XM_021920733.1	Known_gene	1	379957	383511	NW_018743548.1	-	3555	3461	XP_021739110.1|0.0e+00|receptor-like protein kinase HSL1 [Chenopodium quinoa]
LOC110740246	BGI_novel_T005889,XM_021920732.1	Known_gene	2	370505	376646	NW_018743548.1	-	6142	5901	XP_021776424.1|0.0e+00|LOW QUALITY PROTEIN: receptor-like protein kinase HSL1 [Chenopodium quinoa]
LOC110740245	XM_021920731.1	Known_gene	1	358967	361456	NW_018743548.1	-	2490	1031	XP_021776423.1|7.1e-128|60S ribosomal protein L6 [Chenopodium quinoa]
LOC110740244	XM_021920734.1	Known_gene	1	2586234	2588895	NW_018742244.1	-	2662	2098	XP_021776426.1|6.5e-277|LEAF RUST 10 DISEASE-RESISTANCE LOCUS RECEPTOR-LIKE PROTEIN KINASE-like 1.1 [Chenopodium quinoa]
LOC110740243	BGI_novel_T005888,BGI_novel_T005887,XM_021920730.1	Known_gene	3	343897	352868	NW_018743548.1	+	8972	4301	XP_021776422.1|0.0e+00|LOW QUALITY PROTEIN: nuclear poly(A) polymerase 4-like [Chenopodium quinoa]
LOC110740242	XM_021920729.1	Known_gene	1	352865	356951	NW_018743548.1	-	4087	3984	XP_021776421.1|0.0e+00|receptor-like protein kinase HSL1 [Chenopodium quinoa]
LOC110740241	XM_021920728.1	Known_gene	1	330652	338643	NW_018743548.1	-	7992	2250	XP_021739100.1|0.0e+00|uncharacterized protein LOC110705521 [Chenopodium quinoa]
LOC110740240	BGI_novel_T005886,XM_021920727.1,BGI_novel_T005885	Known_gene	3	327227	330721	NW_018743548.1	+	3495	1055	XP_021776419.1|4.1e-58|early nodulin-93-like [Chenopodium quinoa]
LOC110740239	XM_021920726.1,XM_021920725.1	Known_gene	2	323451	326011	NW_018743548.1	+	2561	861	XP_021776417.1|7.9e-72|profilin [Chenopodium quinoa]
LOC110740238	XM_021920724.1	Known_gene	1	307307	310462	NW_018743548.1	+	3156	1019	XP_021776416.1|4.2e-72|profilin-3-like [Chenopodium quinoa]
LOC110740237	XM_021920723.1	Known_gene	1	282436	291646	NW_018743548.1	-	9211	2895	XP_021776415.1|0.0e+00|ATP-dependent 6-phosphofructokinase 6-like [Chenopodium quinoa]
LOC110740236	XM_021920722.1,XM_021920721.1	Known_gene	2	269529	274003	NW_018743548.1	+	4475	2599	XP_021734935.1|0.0e+00|uncharacterized protein LOC110701625 isoform X1 [Chenopodium quinoa]
LOC110740235	XM_021920720.1	Known_gene	1	255961	259241	NW_018743548.1	+	3281	1399	XP_012077351.1|7.6e-157|serine/threonine-protein kinase Aurora-1 isoform X2 [Jatropha curcas]
LOC110740233	XM_021920719.1	Known_gene	1	235910	252318	NW_018743548.1	-	16409	6268	XP_021776411.1|0.0e+00|uncharacterized protein LOC110740233 [Chenopodium quinoa]
LOC110740232	XM_021920716.1,XM_021920718.1,XM_021920717.1,BGI_novel_T005884,BGI_novel_T005883	Known_gene	5	229791	234724	NW_018743548.1	-	4934	1979	XP_021776408.1|5.3e-75|glutamyl-tRNA(Gln) amidotransferase subunit C, chloroplastic/mitochondrial-like [Chenopodium quinoa]
LOC110740231	BGI_novel_T005882,XM_021920715.1	Known_gene	2	212205	228912	NW_018743548.1	+	16708	5062	XP_021847728.1|0.0e+00|uncharacterized protein LOC110787415 [Spinacia oleracea]
LOC110740230	BGI_novel_T005881,XM_021920714.1	Known_gene	2	203416	208720	NW_018743548.1	+	5305	2367	XP_021776406.1|0.0e+00|RNA polymerase sigma factor sigC-like [Chenopodium quinoa]
LOC110740229	XM_021920713.1	Known_gene	1	181452	186132	NW_018743548.1	+	4681	4035	XP_021776405.1|3.1e-187|uncharacterized protein LOC110740229 [Chenopodium quinoa]
LOC110740228	XM_021920711.1	Known_gene	1	171316	172928	NW_018743548.1	-	1613	1613	XP_021776403.1|1.3e-208|zinc finger CCCH domain-containing protein 23-like [Chenopodium quinoa]
LOC110740227	XM_021920710.1	Known_gene	1	145477	148211	NW_018743548.1	-	2735	1805	XP_021776402.1|1.1e-192|transcription factor MYB36-like [Chenopodium quinoa]
LOC110740226	XM_021920709.1	Known_gene	1	134546	137821	NW_018743548.1	+	3276	1242	XP_021776401.1|7.2e-159|chlorophyll a-b binding protein, chloroplastic [Chenopodium quinoa]
LOC110740225	XM_021920712.1	Known_gene	1	2564653	2568118	NW_018742244.1	-	3466	2837	XP_021776404.1|0.0e+00|LEAF RUST 10 DISEASE-RESISTANCE LOCUS RECEPTOR-LIKE PROTEIN KINASE-like 1.2 [Chenopodium quinoa]
LOC110740224	XM_021920708.1	Known_gene	1	122596	133864	NW_018743548.1	+	11269	2427	XP_021776400.1|0.0e+00|clathrin interactor EPSIN 1-like [Chenopodium quinoa]
LOC110740223	BGI_novel_T005880,XM_021920707.1,XM_021920706.1	Known_gene	3	110598	120753	NW_018743548.1	+	10156	1244	XP_021776398.1|5.4e-196|piRNA biogenesis protein EXD1-like isoform X1 [Chenopodium quinoa]
LOC110740222	XM_021920705.1	Known_gene	1	98349	105266	NW_018743548.1	-	6918	3121	XP_021776397.1|0.0e+00|protein EARLY FLOWERING 3-like [Chenopodium quinoa]
LOC110740221	XM_021920704.1	Known_gene	1	90458	93365	NW_018743548.1	-	2908	907	XP_021716681.1|1.6e-94|UPF0587 protein C1orf123 homolog [Chenopodium quinoa]
LOC110740220	XM_021920703.1	Known_gene	1	82239	87590	NW_018743548.1	-	5352	2165	XP_010669159.1|7.1e-186|PREDICTED: uncharacterized protein LOC104886401 [Beta vulgaris subsp. vulgaris]
LOC110740219	XM_021920701.1,XM_021920702.1,XM_021920699.1,XM_021920698.1,BGI_novel_T005879,XM_021920697.1	Known_gene	6	50316	59823	NW_018743548.1	+	9508	1494	XP_021776389.1|1.0e-167|uncharacterized protein LOC110740219 [Chenopodium quinoa]
LOC110740216	XM_021920696.1	Known_gene	1	27600	31012	NW_018743548.1	+	3413	618	XP_021776388.1|3.0e-57|clathrin interactor EPSIN 1-like [Chenopodium quinoa]
LOC110740215	XM_021920695.1	Known_gene	1	465433	465852	NW_018743548.1	-	420	420	XP_021776387.1|2.6e-76|egg cell-secreted protein 1.2-like [Chenopodium quinoa]
LOC110740214	XM_021920694.1	Known_gene	1	462425	464383	NW_018743548.1	-	1959	1008	XP_021740096.1|3.2e-165|amino acid permease 8-like [Chenopodium quinoa]
LOC110740212	XM_021920700.1,XM_021920693.1	Known_gene	2	2555803	2561038	NW_018742244.1	-	5236	1586	XP_021776392.1|2.0e-137|probable protein phosphatase 2C 9 isoform X2 [Chenopodium quinoa]
LOC110740211	XM_021920692.1	Known_gene	1	292900	293418	NW_018743548.1	-	519	519	XP_021776384.1|6.4e-101|uncharacterized protein LOC110740211 [Chenopodium quinoa]
LOC110740210	XM_021920691.1	Known_gene	1	261246	262232	NW_018743548.1	-	987	987	XP_021776383.1|2.3e-192|histone-lysine N-methyltransferase, H3 lysine-9 specific SUVH5-like [Chenopodium quinoa]
LOC110740209	XM_021920690.1	Known_gene	1	144597	145109	NW_018743544.1	+	513	513	XP_021776382.1|1.2e-91|uncharacterized protein LOC110740209 [Chenopodium quinoa]
LOC110740208	XM_021920688.1	Known_gene	1	138624	142166	NW_018743544.1	-	3543	2613	XP_021776380.1|0.0e+00|uncharacterized protein LOC110740208 [Chenopodium quinoa]
LOC110740207	XM_021920687.1	Known_gene	1	128785	129318	NW_018743544.1	+	534	534	XP_021776379.1|2.1e-94|uncharacterized protein LOC110740207 [Chenopodium quinoa]
LOC110740206	XM_021920686.1	Known_gene	1	57099	58581	NW_018743544.1	+	1483	1374	XP_021776378.1|8.0e-276|uncharacterized protein LOC110740206 [Chenopodium quinoa]
LOC110740205	XM_021920689.1	Known_gene	1	2550817	2555332	NW_018742244.1	-	4516	1777	XP_021776381.1|3.3e-165|tobamovirus multiplication protein 1-like [Chenopodium quinoa]
LOC110740204	XM_021920685.1	Known_gene	1	14808	16462	NW_018743538.1	-	1655	1347	XP_021776377.1|4.3e-258|zinc finger MYM-type protein 1-like [Chenopodium quinoa]
LOC110740203	XM_021920684.1	Known_gene	1	12117	12743	NW_018743538.1	-	627	627	XP_021776376.1|5.2e-113|uncharacterized protein LOC110740203 [Chenopodium quinoa]
LOC110740201	XM_021920683.1	Known_gene	1	3217	4254	NW_018743537.1	+	1038	1038	XP_021776375.1|3.3e-173|uncharacterized protein LOC110740201 [Chenopodium quinoa]
LOC110740200	XM_021920681.1	Known_gene	1	24156	28242	NW_018743537.1	-	4087	2436	XP_021776373.1|0.0e+00|uncharacterized protein LOC110740200 [Chenopodium quinoa]
LOC110740199	XM_021920679.1,XM_021920680.1	Known_gene	2	759973	765899	NW_018743529.1	-	5927	3082	XP_021776371.1|0.0e+00|geranylgeranyl transferase type-2 subunit alpha 1-like [Chenopodium quinoa]
LOC110740198	BGI_novel_T005876,XM_021920677.1	Known_gene	2	649920	654014	NW_018743529.1	+	4095	2802	XP_021776369.1|1.2e-73|uncharacterized protein LOC110740198 [Chenopodium quinoa]
LOC110740197	XM_021920676.1	Known_gene	1	659911	661244	NW_018743529.1	+	1334	1008	XP_021776368.1|1.4e-147|uncharacterized protein LOC110740197 [Chenopodium quinoa]
LOC110740196	XM_021920682.1,XM_021920678.1	Known_gene	2	2545555	2549481	NW_018742244.1	+	3927	1096	XP_021776370.1|1.6e-108|ADP-ribosylation factor-related protein 1-like [Chenopodium quinoa]
LOC110740195	XM_021920675.1,XM_021920672.1,XM_021920673.1	Known_gene	3	633162	664185	NW_018743529.1	-	31024	2217	XP_021776364.1|2.5e-162|prolyl 4-hydroxylase 1-like [Chenopodium quinoa]
LOC110740194	XM_021920671.1	Known_gene	1	628861	631574	NW_018743529.1	+	2714	1773	XP_021776363.1|2.8e-188|pirin-like protein [Chenopodium quinoa]
LOC110740193	BGI_novel_T005875,XM_021920670.1	Known_gene	2	474714	479061	NW_018743529.1	-	4348	991	XP_021776362.1|1.5e-61|uncharacterized protein LOC110740193 [Chenopodium quinoa]
LOC110740192	XM_021920669.1	Known_gene	1	347318	369358	NW_018743529.1	+	22041	2035	XP_021776361.1|2.1e-296|uncharacterized protein LOC110740192 [Chenopodium quinoa]
LOC110740191	XM_021920668.1	Known_gene	1	2388	21524	NW_018743529.1	-	19137	2867	XP_021776360.1|0.0e+00|uncharacterized protein LOC110740191 [Chenopodium quinoa]
LOC110740190	XM_021920667.1	Known_gene	1	822547	823674	NW_018743529.1	-	1128	1128	XP_021776359.1|1.2e-224|uncharacterized protein LOC110740190 [Chenopodium quinoa]
LOC110740189	XM_021920666.1	Known_gene	1	818332	820140	NW_018743529.1	-	1809	1809	XP_021776358.1|0.0e+00|uncharacterized protein LOC110740189 [Chenopodium quinoa]
LOC110740188	XM_021920665.1	Known_gene	1	370721	371198	NW_018743529.1	+	478	411	XP_021776357.1|1.3e-72|uncharacterized protein LOC110740188 [Chenopodium quinoa]
LOC110740187	XM_021920664.1	Known_gene	1	328186	329046	NW_018743529.1	-	861	861	XP_021776356.1|9.8e-163|uncharacterized protein LOC110740187 [Chenopodium quinoa]
LOC110740186	XM_021920663.1	Known_gene	1	327432	328022	NW_018743529.1	-	591	591	XP_021776355.1|1.2e-108|uncharacterized protein LOC110740186 [Chenopodium quinoa]
LOC110740185	XM_021920662.1	Known_gene	1	197533	199208	NW_018743529.1	+	1676	1113	XP_021776354.1|2.1e-218|uncharacterized protein LOC110740185 [Chenopodium quinoa]
LOC110740184	XM_021920661.1	Known_gene	1	176634	179365	NW_018743529.1	+	2732	1773	XP_021776353.1|0.0e+00|uncharacterized protein LOC110740184 [Chenopodium quinoa]
LOC110740183	XM_021920660.1	Known_gene	1	170521	170892	NW_018743529.1	-	372	372	XP_021776352.1|5.9e-64|uncharacterized protein LOC110740183 [Chenopodium quinoa]
LOC110740181	XM_021920659.1	Known_gene	1	128365	128916	NW_018743529.1	+	552	552	XP_021776351.1|6.6e-104|uncharacterized protein LOC110740181 [Chenopodium quinoa]
LOC110740180	XM_021920658.1	Known_gene	1	82062	83021	NW_018743529.1	-	960	960	XP_021776350.1|1.0e-181|uncharacterized protein LOC110740180 [Chenopodium quinoa]
LOC110740175	XM_021920657.1	Known_gene	1	7777	8649	NW_018743525.1	+	873	700	XP_021776349.1|1.5e-65|uncharacterized protein LOC110740175, partial [Chenopodium quinoa]
LOC110740172	XM_021920656.1	Known_gene	1	11223	13666	NW_018743523.1	+	2444	1877	XP_021743737.1|4.7e-271|protein ECERIFERUM 2-like [Chenopodium quinoa]
LOC110740171	XM_021920655.1	Known_gene	1	3186	8020	NW_018743523.1	+	4835	2688	XP_021776347.1|0.0e+00|glutamate receptor 2.5-like [Chenopodium quinoa]
LOC110740170	XM_021920653.1	Known_gene	1	41510	43907	NW_018743523.1	+	2398	1296	XP_021776345.1|8.3e-65|uncharacterized protein LOC110740170 [Chenopodium quinoa]
LOC110740167	XM_021920652.1,BGI_novel_T005869	Known_gene	2	14682	39894	NW_018743522.1	+	25213	3189	XP_021776344.1|0.0e+00|LOW QUALITY PROTEIN: ankyrin repeat-containing protein ITN1-like [Chenopodium quinoa]
LOC110740166	XM_021920654.1	Known_gene	1	2520629	2527246	NW_018742244.1	-	6618	1736	XP_021776346.1|4.9e-214|ubiquitin carboxyl-terminal hydrolase 4-like [Chenopodium quinoa]
LOC110740165	XM_021920651.1	Known_gene	1	84869	86096	NW_018743522.1	-	1228	1183	XP_021776343.1|1.0e-93|uncharacterized protein LOC110740165 [Chenopodium quinoa]
LOC110740164	XM_021920650.1	Known_gene	1	3936	19933	NW_018743521.1	+	15998	2733	XP_021776342.1|0.0e+00|LOW QUALITY PROTEIN: DNA mismatch repair protein PMS1-like, partial [Chenopodium quinoa]
LOC110740162	XM_021920674.1	Known_gene	1	18194247	18196282	NW_018742204.1	-	2036	570	XP_021776366.1|9.5e-106|scopoletin glucosyltransferase-like [Chenopodium quinoa]
LOC110740161	XM_021920649.1	Known_gene	1	15250	16149	NW_018743520.1	+	900	900	XP_021723157.1|1.8e-106|uncharacterized protein LOC110690616 [Chenopodium quinoa]
LOC110740156	XM_021920647.1	Known_gene	1	1800110	1800973	NW_018743518.1	+	864	864	XP_021776339.1|9.2e-153|uncharacterized protein LOC110740156 [Chenopodium quinoa]
LOC110740154	XM_021920648.1	Known_gene	1	2510959	2519964	NW_018742244.1	+	9006	3473	XP_021776340.1|0.0e+00|calmodulin-binding transcription activator 2-like [Chenopodium quinoa]
LOC110740153	XM_021920646.1	Known_gene	1	1675534	1676344	NW_018743518.1	+	811	687	XP_021776338.1|1.2e-131|protein ALP1-like [Chenopodium quinoa]
LOC110740151	XM_021920645.1	Known_gene	1	1591004	1591930	NW_018743518.1	-	927	495	XP_021776337.1|2.4e-89|uncharacterized protein LOC110740151 [Chenopodium quinoa]
LOC110740150	XM_021920644.1	Known_gene	1	1536536	1537378	NW_018743518.1	+	843	741	XP_021776336.1|8.7e-144|LOW QUALITY PROTEIN: zinc finger protein ZAT3-like [Chenopodium quinoa]
LOC110740149	XM_021920643.1	Known_gene	1	1511424	1513678	NW_018743518.1	-	2255	848	XP_021776335.1|3.5e-157|uncharacterized protein LOC110740149 [Chenopodium quinoa]
LOC110740148	XM_021920642.1	Known_gene	1	1464133	1464477	NW_018743518.1	+	345	345	XP_021776334.1|4.3e-61|uncharacterized protein LOC110740148 [Chenopodium quinoa]
LOC110740147	XM_021920641.1	Known_gene	1	1228835	1229680	NW_018743518.1	-	846	846	XP_021776333.1|4.3e-163|uncharacterized protein LOC110740147 [Chenopodium quinoa]
LOC110740145	BGI_novel_T005853,XM_021920639.1,BGI_novel_T005854	Known_gene	3	997549	999912	NW_018743518.1	-	2364	1476	XP_021776331.1|6.6e-98|CASP-like protein XL3 [Chenopodium quinoa]
LOC110740144	BGI_novel_T000580,XM_021920640.1	Known_gene	2	2489796	2507450	NW_018742244.1	-	17655	1421	XP_021776332.1|4.5e-197|ubiquinol oxidase, mitochondrial-like [Chenopodium quinoa]
LOC110740143	XM_021920638.1	Known_gene	1	932794	935356	NW_018743518.1	-	2563	960	XP_021776330.1|3.9e-176|transcription factor bHLH25-like [Chenopodium quinoa]
LOC110740142	XM_021920637.1	Known_gene	1	880081	881485	NW_018743518.1	+	1405	520	XP_021724577.1|3.1e-39|40S ribosomal protein S23-2 [Chenopodium quinoa]
LOC110740141	XM_021920636.1	Known_gene	1	821530	823078	NW_018743518.1	-	1549	1549	XP_021717254.1|2.2e-125|RNA polymerase II C-terminal domain phosphatase-like 4 [Chenopodium quinoa]
LOC110740138	XM_021920635.1	Known_gene	1	746603	747754	NW_018743518.1	-	1152	897	XP_021776327.1|6.2e-168|RNA polymerase II C-terminal domain phosphatase-like 4 [Chenopodium quinoa]
LOC110740137	XM_021920633.1	Known_gene	1	742594	743747	NW_018743518.1	-	1154	867	XP_021776325.1|1.7e-162|RNA polymerase II C-terminal domain phosphatase-like 4 [Chenopodium quinoa]
LOC110740136	XM_021920632.1	Known_gene	1	701178	702038	NW_018743518.1	-	861	861	XP_021776324.1|5.7e-155|uncharacterized protein LOC110740136 [Chenopodium quinoa]
LOC110740135	BGI_novel_T000579,XM_021920634.1,BGI_novel_T000578	Known_gene	3	2482386	2489325	NW_018742244.1	+	6940	3915	XP_021776326.1|0.0e+00|copper-transporting ATPase PAA1, chloroplastic-like [Chenopodium quinoa]
LOC110740134	XM_021920631.1	Known_gene	1	694105	694756	NW_018743518.1	+	652	652	XP_021776323.1|7.3e-94|pathogenesis-related protein PRB1-3-like, partial [Chenopodium quinoa]
LOC110740133	XM_021920630.1	Known_gene	1	671129	673354	NW_018743518.1	+	2226	1425	XP_021776322.1|1.9e-267|uncharacterized protein LOC110740133 [Chenopodium quinoa]
LOC110740132	XM_021920629.1	Known_gene	1	668363	669061	NW_018743518.1	+	699	699	XP_021776321.1|1.0e-130|uncharacterized protein LOC110740132 [Chenopodium quinoa]
LOC110740131	XM_021920628.1	Known_gene	1	660379	662849	NW_018743518.1	+	2471	2124	XP_021776320.1|0.0e+00|zinc finger MYM-type protein 1-like [Chenopodium quinoa]
LOC110740130	XM_021920627.1	Known_gene	1	624251	629044	NW_018743518.1	-	4794	2321	XP_021776319.1|3.4e-218|uncharacterized protein LOC110740130 [Chenopodium quinoa]
LOC110740129	XM_021920626.1	Known_gene	1	428069	432399	NW_018743518.1	+	4331	3694	XP_021776318.1|0.0e+00|putative disease resistance protein RGA3 [Chenopodium quinoa]
LOC110740128	XM_021920624.1	Known_gene	1	423345	423927	NW_018743518.1	-	583	390	XP_021776316.1|2.7e-80|annexin A7-like [Chenopodium quinoa]
LOC110740127	XM_021920623.1	Known_gene	1	415981	423996	NW_018743518.1	-	8016	3548	XP_021776315.1|2.5e-228|protein FAR1-RELATED SEQUENCE 6-like [Chenopodium quinoa]
LOC110740126	XM_021920622.1	Known_gene	1	366591	370971	NW_018743518.1	+	4381	1764	XP_021776314.1|0.0e+00|uncharacterized protein LOC110740126 [Chenopodium quinoa]
LOC110740125	XM_021920625.1,BGI_novel_T000577	Known_gene	2	2473175	2477313	NW_018742244.1	-	4139	1072	XP_021860100.1|5.9e-101|ADP-ribosylation factor-like protein 5 isoform X1 [Spinacia oleracea]
LOC110740123	XM_021920621.1	Known_gene	1	354954	357152	NW_018743518.1	-	2199	2199	XP_021776313.1|0.0e+00|disease resistance protein RGA2-like [Chenopodium quinoa]
LOC110740122	XM_021920620.1	Known_gene	1	353510	354895	NW_018743518.1	-	1386	1386	XP_021776312.1|6.8e-275|putative disease resistance protein RGA3 [Chenopodium quinoa]
LOC110740121	XM_021920619.1	Known_gene	1	349965	351917	NW_018743518.1	-	1953	1953	XP_021776311.1|0.0e+00|disease resistance protein RGA2-like [Chenopodium quinoa]
LOC110740120	XM_021920618.1	Known_gene	1	181526	181951	NW_018743518.1	-	426	426	XP_021776310.1|1.1e-77|uncharacterized protein LOC110740120 [Chenopodium quinoa]
LOC110740119	XM_021920616.1	Known_gene	1	119778	120836	NW_018743518.1	-	1059	1059	XP_021776308.1|4.1e-171|zinc finger protein 4-like [Chenopodium quinoa]
LOC110740118	XM_021920615.1	Known_gene	1	58014	60980	NW_018743518.1	-	2967	1154	XP_021776307.1|2.6e-222|biorientation of chromosomes in cell division protein 1-like 1 [Chenopodium quinoa]
LOC110740117	XM_021920614.1	Known_gene	1	1849863	1850551	NW_018743518.1	-	689	585	XP_021776306.1|3.7e-73|expansin-like A2 [Chenopodium quinoa]
LOC110740116	XM_021920617.1	Known_gene	1	2478099	2480618	NW_018742244.1	-	2520	1512	XP_021776309.1|2.1e-168|NADH dehydrogenase (ubiquinone) complex I, assembly factor 6-like [Chenopodium quinoa]
LOC110740114	XM_021920613.1	Known_gene	1	1831566	1834370	NW_018743518.1	-	2805	1411	XP_021776305.1|7.5e-136|cytokinin riboside 5'-monophosphate phosphoribohydrolase LOG5-like [Chenopodium quinoa]
LOC110740113	XM_021920612.1	Known_gene	1	1809168	1810946	NW_018743518.1	-	1779	1301	XP_021776304.1|3.7e-182|NAC domain-containing protein 35-like [Chenopodium quinoa]
LOC110740112	XM_021920611.1	Known_gene	1	1787686	1795182	NW_018743518.1	+	7497	2232	XP_021776303.1|1.3e-304|probable serine/threonine-protein kinase At4g35230 [Chenopodium quinoa]
LOC110740111	XM_021920610.1	Known_gene	1	1775393	1781815	NW_018743518.1	+	6423	3835	XP_021774656.1|0.0e+00|uncharacterized protein LOC110738563 [Chenopodium quinoa]
LOC110740109	BGI_novel_T005864,XM_021920609.1	Known_gene	2	1718796	1742542	NW_018743518.1	+	23747	1581	XP_021727598.1|1.2e-227|uncharacterized protein ycf39-like [Chenopodium quinoa]
LOC110740107	XM_021920607.1	Known_gene	1	1718796	1724618	NW_018743518.1	+	5823	1529	XP_021727598.1|1.2e-227|uncharacterized protein ycf39-like [Chenopodium quinoa]
LOC110740106	XM_021920606.1	Known_gene	1	1712585	1718259	NW_018743518.1	+	5675	2695	XP_021776298.1|0.0e+00|uncharacterized protein At1g04910-like [Chenopodium quinoa]
LOC110740105	XM_021920604.1,XM_021920605.1	Known_gene	2	1696151	1705414	NW_018743518.1	-	9264	2301	XP_021776296.1|1.4e-224|glycerol-3-phosphate acyltransferase 3-like [Chenopodium quinoa]
LOC110740104	XM_021920603.1	Known_gene	1	1686600	1691542	NW_018743518.1	-	4943	1540	XP_021776295.1|8.3e-205|lysM domain-containing GPI-anchored protein 2-like [Chenopodium quinoa]
LOC110740103	XM_021920602.1	Known_gene	1	1679630	1686481	NW_018743518.1	-	6852	2940	XP_021776294.1|0.0e+00|protein DETOXIFICATION 45, chloroplastic-like [Chenopodium quinoa]
LOC110740102	XM_021920599.1,XM_021920600.1	Known_gene	2	1657833	1670805	NW_018743518.1	-	12973	1885	XP_021776291.1|5.6e-304|sodium transporter HKT1-like isoform X1 [Chenopodium quinoa]
LOC110740100	XM_021920598.1	Known_gene	1	1632307	1646653	NW_018743518.1	+	14347	1806	XP_021776290.1|0.0e+00|probable flavin-containing monooxygenase 1 [Chenopodium quinoa]
LOC110740099	XM_021920597.1	Known_gene	1	1623727	1628687	NW_018743518.1	+	4961	1830	XP_021776289.1|2.8e-207|isocitrate dehydrogenase [NAD] regulatory subunit 1, mitochondrial-like [Chenopodium quinoa]
LOC110740098	XM_021920596.1	Known_gene	1	1619489	1621924	NW_018743518.1	+	2436	2307	XP_021776288.1|0.0e+00|SEC1 family transport protein SLY1-like [Chenopodium quinoa]
LOC110740096	XM_021920594.1,XM_021920593.1	Known_gene	2	1594840	1599914	NW_018743518.1	-	5075	1894	XP_021776285.1|1.6e-77|isocitrate dehydrogenase [NAD] regulatory subunit 3, mitochondrial-like [Chenopodium quinoa]
LOC110740095	XM_021920592.1	Known_gene	1	1578756	1582627	NW_018743518.1	+	3872	3255	XP_021776284.1|0.0e+00|pentatricopeptide repeat-containing protein At2g17140-like [Chenopodium quinoa]
LOC110740094	XM_021920595.1,XM_021920601.1,XM_021920608.1	Known_gene	3	2467363	2472359	NW_018742244.1	-	4997	2095	XP_021776287.1|3.5e-144|serine/arginine-rich splicing factor SC35-like [Chenopodium quinoa]
LOC110740093	XM_021920591.1,XM_021920590.1	Known_gene	2	1559244	1564145	NW_018743518.1	+	4902	3683	XP_021776282.1|0.0e+00|protein NLP2-like [Chenopodium quinoa]
LOC110740092	XM_021920589.1	Known_gene	1	1492853	1496696	NW_018743518.1	-	3844	2705	XP_021776281.1|0.0e+00|root phototropism protein 3-like [Chenopodium quinoa]
LOC110740091	XM_021920588.1	Known_gene	1	1480370	1484708	NW_018743518.1	+	4339	3118	XP_021776280.1|1.6e-226|transcription factor bHLH143-like [Chenopodium quinoa]
LOC110740090	XM_021920587.1	Known_gene	1	1472802	1475711	NW_018743518.1	+	2910	596	XP_021776279.1|2.2e-60|peptidyl-prolyl cis-trans isomerase FKBP12-like [Chenopodium quinoa]
LOC110740089	XM_021920586.1	Known_gene	1	1457891	1461278	NW_018743518.1	+	3388	1883	XP_021776278.1|1.2e-234|pre-mRNA-splicing factor 18-like [Chenopodium quinoa]
LOC110740088	XM_021920585.1	Known_gene	1	1453217	1457162	NW_018743518.1	-	3946	1063	XP_021776277.1|2.4e-102|uncharacterized protein LOC110740088 [Chenopodium quinoa]
LOC110740087	BGI_novel_T005862,XM_021920584.1,XM_021920582.1	Known_gene	3	1447364	1451898	NW_018743518.1	+	4535	1701	XP_021776274.1|1.0e-170|beta carbonic anhydrase 5, chloroplastic-like isoform X1 [Chenopodium quinoa]
LOC110740086	XM_021920581.1,XM_021920580.1	Known_gene	2	1434245	1438407	NW_018743518.1	+	4163	3063	XP_021776272.1|0.0e+00|protein SCARECROW-like isoform X1 [Chenopodium quinoa]
LOC110740085	XM_021920579.1	Known_gene	1	1421116	1423791	NW_018743518.1	+	2676	2676	XP_021776271.1|0.0e+00|uncharacterized protein LOC110740085 [Chenopodium quinoa]
LOC110740083	XM_021920578.1	Known_gene	1	1401434	1405974	NW_018743518.1	-	4541	704	XP_021776270.1|7.4e-84|MADS-box protein AGL24-like [Chenopodium quinoa]
LOC110740082	XM_021920577.1	Known_gene	1	1382822	1386069	NW_018743518.1	-	3248	1190	XP_021776269.1|6.8e-98|magnesium-dependent phosphatase 1-like [Chenopodium quinoa]
LOC110740081	XM_021920576.1	Known_gene	1	1378270	1382637	NW_018743518.1	+	4368	3226	XP_021776268.1|0.0e+00|uncharacterized protein At4g38062-like [Chenopodium quinoa]
LOC110740080	XM_021920574.1	Known_gene	1	1372715	1377467	NW_018743518.1	+	4753	1419	XP_021776266.1|8.4e-111|uncharacterized protein LOC110740080 [Chenopodium quinoa]
LOC110740079	XM_021920573.1	Known_gene	1	1366200	1369740	NW_018743518.1	-	3541	1213	XP_021776265.1|4.7e-78|uncharacterized protein LOC110740079 [Chenopodium quinoa]
LOC110740078	XM_021920572.1	Known_gene	1	1361881	1365625	NW_018743518.1	-	3745	1699	XP_021776264.1|6.4e-251|beta-ureidopropionase-like [Chenopodium quinoa]
LOC110740077	XM_021920583.1,XM_021920575.1	Known_gene	2	2454722	2460864	NW_018742244.1	+	6143	4986	XP_021776267.1|0.0e+00|putative disease resistance protein RGA3 [Chenopodium quinoa]
LOC110740076	XM_021920571.1	Known_gene	1	1348159	1351613	NW_018743518.1	-	3455	1728	XP_021776263.1|1.5e-247|IAA-amino acid hydrolase ILR1-like 5 [Chenopodium quinoa]
LOC110740075	XM_021920570.1,XM_021920569.1	Known_gene	2	1341763	1347725	NW_018743518.1	+	5963	3223	XP_021776261.1|0.0e+00|pentatricopeptide repeat-containing protein At1g63330-like [Chenopodium quinoa]
LOC110740074	XM_021920568.1	Known_gene	1	1330155	1332016	NW_018743518.1	+	1862	1203	XP_021776260.1|1.8e-138|nicotinamidase 1-like [Chenopodium quinoa]
LOC110740073	XM_021920567.1,XM_021920566.1,XM_021920565.1,BGI_novel_T005861,XM_021920564.1	Known_gene	5	1332201	1340808	NW_018743518.1	-	8608	2888	XP_021776256.1|0.0e+00|protein EXECUTER 1, chloroplastic-like isoform X1 [Chenopodium quinoa]
LOC110740072	XM_021920562.1	Known_gene	1	1325350	1328187	NW_018743518.1	-	2838	1090	XP_021776254.1|5.4e-158|uncharacterized protein LOC110740072 [Chenopodium quinoa]
LOC110740071	XM_021920561.1	Known_gene	1	1318539	1319391	NW_018743518.1	+	853	853	XP_021776253.1|4.2e-73|VQ motif-containing protein 10-like [Chenopodium quinoa]
LOC110740070	XM_021920560.1	Known_gene	1	1321577	1324833	NW_018743518.1	-	3257	1502	XP_021776252.1|1.7e-215|ADP-glucose phosphorylase-like [Chenopodium quinoa]
LOC110740069	XM_021920559.1	Known_gene	1	1310518	1313706	NW_018743518.1	-	3189	1753	XP_021776251.1|8.2e-225|fructose-1,6-bisphosphatase, chloroplastic-like [Chenopodium quinoa]
LOC110740068	XM_021920558.1	Known_gene	1	1303381	1304887	NW_018743518.1	+	1507	654	XP_021776250.1|1.4e-44|costars family protein-like [Chenopodium quinoa]
LOC110740067	BGI_novel_T005860,XM_021920557.1	Known_gene	2	1305312	1309733	NW_018743518.1	-	4422	2139	XP_021776249.1|0.0e+00|KH domain-containing protein HEN4-like [Chenopodium quinoa]
LOC110740066	XM_021920556.1	Known_gene	1	1296769	1302187	NW_018743518.1	-	5419	1559	XP_021776248.1|1.3e-205|GATA transcription factor 24-like [Chenopodium quinoa]
LOC110740065	XM_021920554.1	Known_gene	1	1283948	1296142	NW_018743518.1	+	12195	3188	XP_021776246.1|0.0e+00|dynamin-related protein 3A-like [Chenopodium quinoa]
LOC110740064	XM_021920553.1	Known_gene	1	1276899	1281219	NW_018743518.1	+	4321	1600	XP_021776245.1|1.2e-158|gamma-glutamyl peptidase 5-like [Chenopodium quinoa]
LOC110740062	XM_021920555.1,XM_021920563.1	Known_gene	2	2444446	2451380	NW_018742244.1	+	6935	6830	XP_021776247.1|0.0e+00|putative disease resistance protein RGA1 [Chenopodium quinoa]
LOC110740061	XM_021920552.1	Known_gene	1	1259302	1267221	NW_018743518.1	+	7920	1878	XP_010691445.1|1.4e-286|PREDICTED: methylmalonate-semialdehyde dehydrogenase [acylating], mitochondrial [Beta vulgaris subsp. vulgaris]
LOC110740060	XM_021920551.1	Known_gene	1	1241399	1242802	NW_018743518.1	+	1404	1404	XP_021776243.1|6.2e-199|protein FLOURY 1-like [Chenopodium quinoa]
LOC110740059	XM_021920549.1,XM_021920550.1,BGI_novel_T005859,XM_021920547.1,XM_021920548.1	Known_gene	5	1216362	1224185	NW_018743518.1	-	7824	1678	XP_021776239.1|2.0e-121|MADS-box transcription factor 23-like isoform X1 [Chenopodium quinoa]
LOC110740058	XM_021920546.1	Known_gene	1	1197119	1199826	NW_018743518.1	-	2708	1079	XP_021776238.1|5.2e-129|MADS-box transcription factor 23-like [Chenopodium quinoa]
LOC110740056	XM_021920543.1,XM_021920544.1	Known_gene	2	1164313	1179077	NW_018743518.1	-	14765	1397	XP_021776236.1|1.6e-130|MADS-box transcription factor 23-like isoform X2 [Chenopodium quinoa]
LOC110740055	XM_021920545.1	Known_gene	1	2438738	2442635	NW_018742244.1	-	3898	1053	XP_021776237.1|3.4e-125|uncharacterized protein LOC110740055 [Chenopodium quinoa]
LOC110740054	XM_021920541.1,XM_021920542.1,XM_021920540.1,BGI_novel_T005858	Known_gene	4	1149592	1158020	NW_018743518.1	-	8429	1868	XP_021776232.1|2.1e-214|uncharacterized protein LOC110740054 isoform X1 [Chenopodium quinoa]
LOC110740053	XM_021920539.1	Known_gene	1	1142922	1151854	NW_018743518.1	+	8933	2655	XP_021862485.1|0.0e+00|oligopeptide transporter 4-like [Spinacia oleracea]
LOC110740052	BGI_novel_T005857,BGI_novel_T005856,XM_021920537.1,XM_021920538.1	Known_gene	4	1123561	1126511	NW_018743518.1	+	2951	1882	XP_021776230.1|9.3e-86|uncharacterized protein LOC110740052 isoform X2 [Chenopodium quinoa]
LOC110740051	XM_021920536.1	Known_gene	1	1127801	1131205	NW_018743518.1	+	3405	2624	KNA12697.1|0.0e+00|hypothetical protein SOVF_123590 [Spinacia oleracea]
LOC110740050	XM_021920535.1	Known_gene	1	1117290	1122463	NW_018743518.1	-	5174	1789	XP_021776227.1|1.5e-295|2-(3-amino-3-carboxypropyl)histidine synthase subunit 2-like [Chenopodium quinoa]
LOC110740049	XM_021920533.1	Known_gene	1	1113104	1116654	NW_018743518.1	-	3551	2445	XP_021776225.1|7.3e-264|uncharacterized protein LOC110740049 [Chenopodium quinoa]
LOC110740048	XM_021920532.1	Known_gene	1	1107936	1112082	NW_018743518.1	-	4147	2677	XP_021776224.1|0.0e+00|heat shock 70 kDa protein, mitochondrial [Chenopodium quinoa]
LOC110740047	XM_021920531.1	Known_gene	1	1100701	1106540	NW_018743518.1	+	5840	3884	XP_021776223.1|0.0e+00|uncharacterized protein LOC110740047 [Chenopodium quinoa]
LOC110740046	XM_021920534.1	Known_gene	1	2422282	2424605	NW_018742244.1	-	2324	2107	XP_021753173.1|0.0e+00|MDIS1-interacting receptor like kinase 2-like [Chenopodium quinoa]
LOC110740045	XM_021920530.1	Known_gene	1	1089718	1098274	NW_018743518.1	-	8557	4843	XP_021848318.1|0.0e+00|DNA polymerase V [Spinacia oleracea]
LOC110740044	XM_021920529.1	Known_gene	1	1085160	1088285	NW_018743518.1	-	3126	2890	XP_021776221.1|0.0e+00|transcription factor GTE7-like [Chenopodium quinoa]
LOC110740043	XM_021920528.1	Known_gene	1	1077263	1078346	NW_018743518.1	+	1084	1003	XP_021776220.1|9.3e-173|protein MAIN-LIKE 1-like [Chenopodium quinoa]
LOC110740042	XM_021920527.1	Known_gene	1	1078310	1083489	NW_018743518.1	-	5180	4017	XP_021776219.1|0.0e+00|protein FAR1-RELATED SEQUENCE 5-like [Chenopodium quinoa]
LOC110740039	XM_021920526.1	Known_gene	1	1047685	1049590	NW_018743518.1	+	1906	1906	XP_021717257.1|4.7e-274|transcription activator MSS11-like [Chenopodium quinoa]
LOC110740038	XM_021920524.1	Known_gene	1	1017864	1023158	NW_018743518.1	+	5295	1611	XP_021776216.1|2.1e-195|phosphoglycerate mutase-like protein 1 [Chenopodium quinoa]
LOC110740037	XM_021920522.1,XM_021920523.1	Known_gene	2	1023245	1033517	NW_018743518.1	-	10273	2282	XP_021848321.1|0.0e+00|fatty acid amide hydrolase [Spinacia oleracea]
LOC110740036	XM_021920525.1	Known_gene	1	2417440	2422120	NW_018742244.1	+	4681	1985	XP_021776217.1|4.8e-290|glutamate decarboxylase-like [Chenopodium quinoa]
LOC110740035	XM_021920521.1	Known_gene	1	1012572	1017135	NW_018743518.1	-	4564	1955	XP_021776213.1|2.8e-250|protein trichome birefringence-like 12 [Chenopodium quinoa]
LOC110740034	XM_021920519.1,XM_021920520.1,BGI_novel_T005855	Known_gene	3	1007999	1010838	NW_018743518.1	+	2840	2397	XP_021776211.1|1.2e-224|protein RMD5 homolog A-like [Chenopodium quinoa]
LOC110740033	XM_021920518.1	Known_gene	1	989962	992659	NW_018743518.1	-	2698	980	XP_021776210.1|1.2e-129|peptide methionine sulfoxide reductase B5-like [Chenopodium quinoa]
LOC110740032	XM_021920517.1,XM_021920516.1,XM_021920515.1,BGI_novel_T005852	Known_gene	4	981867	989030	NW_018743518.1	-	7164	2858	XP_021717199.1|0.0e+00|K(+) efflux antiporter 3, chloroplastic-like isoform X1 [Chenopodium quinoa]
LOC110740031	XM_021920514.1	Known_gene	1	964612	970694	NW_018743518.1	+	6083	2348	XP_021776206.1|7.9e-300|nucleobase-ascorbate transporter 1-like [Chenopodium quinoa]
LOC110740030	XM_021920512.1,XM_021920511.1	Known_gene	2	971213	980096	NW_018743518.1	-	8884	2307	XP_021776203.1|1.2e-308|probable sphingolipid transporter spinster homolog 2 [Chenopodium quinoa]
LOC110740029	BGI_novel_T005851,XM_021920510.1	Known_gene	2	943507	951434	NW_018743518.1	-	7928	2658	XP_021287148.1|7.9e-234|probable protein S-acyltransferase 23 [Herrania umbratica]
LOC110740028	XM_021920513.1	Known_gene	1	2401213	2408941	NW_018742244.1	+	7729	1923	XP_021776205.1|8.1e-218|CD2 antigen cytoplasmic tail-binding protein 2 homolog [Chenopodium quinoa]
LOC110740027	XM_021920509.1	Known_gene	1	940606	943146	NW_018743518.1	+	2541	1403	XP_021717195.1|2.6e-189|L-galactose dehydrogenase-like [Chenopodium quinoa]
LOC110740022	BGI_novel_T005847,BGI_novel_T005848,XM_021920507.1,XM_021920506.1,XM_021920503.1,XM_021920508.1,XM_021920504.1,XM_021920502.1	Known_gene	8	825695	834962	NW_018743518.1	-	9268	2028	XP_021776194.1|5.7e-200|proline iminopeptidase-like [Chenopodium quinoa]
LOC110740021	BGI_novel_T005846,XM_021920501.1	Known_gene	2	823445	826920	NW_018743518.1	+	3476	2503	XP_021776193.1|0.0e+00|uncharacterized protein LOC110740021 [Chenopodium quinoa]
LOC110740020	XM_021920505.1	Known_gene	1	2388662	2395337	NW_018742244.1	+	6676	769	XP_021776197.1|2.7e-79|uncharacterized protein LOC110740020 [Chenopodium quinoa]
LOC110740019	XM_021920500.1	Known_gene	1	804583	811686	NW_018743518.1	+	7104	1924	XP_021717182.1|2.3e-236|DUF21 domain-containing protein At2g14520-like isoform X1 [Chenopodium quinoa]
LOC110740018	XM_021920499.1	Known_gene	1	796902	802178	NW_018743518.1	+	5277	1303	XP_021776191.1|3.7e-145|uncharacterized protein At3g49720-like [Chenopodium quinoa]
LOC110740017	XM_021920498.1	Known_gene	1	789461	792331	NW_018743518.1	+	2871	859	XP_021776190.1|2.6e-59|cytochrome c-like [Chenopodium quinoa]
LOC110740016	XM_021920497.1	Known_gene	1	793517	796342	NW_018743518.1	+	2826	874	XP_021717179.1|2.0e-59|cytochrome c-like [Chenopodium quinoa]
LOC110740015	XM_021920496.1	Known_gene	1	766613	769246	NW_018743518.1	+	2634	1921	XP_021776188.1|2.9e-98|uncharacterized protein LOC110740015 [Chenopodium quinoa]
LOC110740013	XM_021920495.1	Known_gene	1	762640	766044	NW_018743518.1	-	3405	2158	XP_021776187.1|1.5e-292|cytochrome P450 76AD1-like [Chenopodium quinoa]
LOC110740012	XM_021920493.1	Known_gene	1	737241	741845	NW_018743518.1	+	4605	872	XP_021776185.1|5.3e-92|pathogenesis-related protein 1A-like [Chenopodium quinoa]
LOC110740010	XM_021920492.1	Known_gene	1	703942	704763	NW_018743518.1	+	822	822	XP_021776184.1|2.0e-93|pathogenesis-related protein 1A-like [Chenopodium quinoa]
LOC110740009	XM_021920494.1	Known_gene	1	2382193	2386725	NW_018742244.1	-	4533	1745	XP_021776186.1|2.9e-230|phosphoribosylformylglycinamidine cyclo-ligase, chloroplastic-like [Chenopodium quinoa]
LOC110740007	XM_021920491.1	Known_gene	1	691081	691987	NW_018743518.1	+	907	907	XP_021776183.1|1.0e-93|pathogenesis-related protein PRB1-3-like [Chenopodium quinoa]
LOC110740006	XM_021920490.1	Known_gene	1	689430	690420	NW_018743518.1	+	991	991	XP_021776182.1|1.3e-94|basic form of pathogenesis-related protein 1-like [Chenopodium quinoa]
LOC110740005	XM_021920488.1	Known_gene	1	684624	685487	NW_018743518.1	+	864	864	XP_021717168.1|1.1e-97|pathogenesis-related protein 1A-like [Chenopodium quinoa]
LOC110740004	XM_021920487.1	Known_gene	1	662843	666771	NW_018743518.1	-	3929	2058	XP_021776179.1|3.7e-293|myb-like protein X [Chenopodium quinoa]
LOC110740003	XM_021920486.1	Known_gene	1	651159	653668	NW_018743518.1	+	2510	1798	XP_021776178.1|1.3e-286|uncharacterized protein LOC110740003 [Chenopodium quinoa]
LOC110740002	XM_021920485.1	Known_gene	1	616161	620575	NW_018743518.1	+	4415	3540	XP_021776177.1|0.0e+00|uncharacterized protein LOC110740002 [Chenopodium quinoa]
LOC110740001	BGI_novel_T005841,XM_021920483.1	Known_gene	2	567267	575368	NW_018743518.1	+	8102	2109	KAA8528417.1|9.1e-138|hypothetical protein F0562_035772 [Nyssa sinensis]
LOC110740000	XM_021920482.1	Known_gene	1	575668	579648	NW_018743518.1	-	3981	2946	XP_021776174.1|1.1e-277|F-box/kelch-repeat protein At1g22040-like [Chenopodium quinoa]
LOC110739999	XM_021920484.1	Known_gene	1	2375281	2379844	NW_018742244.1	-	4564	4049	XP_021776176.1|0.0e+00|LOW QUALITY PROTEIN: receptor protein kinase TMK1-like [Chenopodium quinoa]
LOC110739998	XM_021920481.1	Known_gene	1	579804	610015	NW_018743518.1	-	30212	7839	XP_021717158.1|0.0e+00|serine/threonine-protein kinase TOR-like isoform X2 [Chenopodium quinoa]
LOC110739997	XM_021920480.1	Known_gene	1	561169	565068	NW_018743518.1	-	3900	1274	XP_021776172.1|1.3e-110|uncharacterized protein LOC110739997 [Chenopodium quinoa]
LOC110739996	XM_021920479.1	Known_gene	1	558386	560481	NW_018743518.1	+	2096	1120	XP_010691536.1|4.0e-148|PREDICTED: 60S ribosomal protein L8-1 [Beta vulgaris subsp. vulgaris]
LOC110739995	XM_021920478.1,BGI_novel_T005840	Known_gene	2	548450	556804	NW_018743518.1	+	8355	1941	XP_021839155.1|3.8e-231|amino acid permease 6-like [Spinacia oleracea]
LOC110739994	XM_021920477.1	Known_gene	1	542403	544455	NW_018743518.1	+	2053	2053	XP_021776169.1|0.0e+00|putative F-box protein At1g23770 [Chenopodium quinoa]
LOC110739993	XM_021920476.1	Known_gene	1	536070	540586	NW_018743518.1	-	4517	2428	XP_021776168.1|0.0e+00|probable zinc metallopeptidase EGY3, chloroplastic [Chenopodium quinoa]
LOC110739992	BGI_novel_T005839,XM_021920475.1	Known_gene	2	516526	534471	NW_018743518.1	-	17946	4492	XP_021776167.1|0.0e+00|pre-mRNA-processing protein 40A-like [Chenopodium quinoa]
LOC110739991	BGI_novel_T005838,XM_021920474.1	Known_gene	2	508286	510400	NW_018743518.1	-	2115	2016	XP_021776166.1|1.8e-35|uncharacterized protein LOC110739991 [Chenopodium quinoa]
LOC110739990	XM_021920473.1,XM_021920472.1	Known_gene	2	493706	498115	NW_018743518.1	+	4410	1722	XP_021776164.1|1.4e-285|serine carboxypeptidase-like 18 isoform X1 [Chenopodium quinoa]
LOC110739989	XM_021920471.1	Known_gene	1	486014	492681	NW_018743518.1	-	6668	1857	XP_021776163.1|3.5e-274|magnesium transporter MRS2-3-like [Chenopodium quinoa]
LOC110739988	XM_021920470.1	Known_gene	1	484590	485714	NW_018743518.1	-	1125	718	XP_021776162.1|4.9e-67|uncharacterized protein LOC110739988 [Chenopodium quinoa]
LOC110739987	XM_021920469.1	Known_gene	1	474975	484505	NW_018743518.1	+	9531	1083	XP_021776161.1|7.0e-158|uncharacterized protein LOC110739987 [Chenopodium quinoa]
LOC110739985	XM_021920467.1	Known_gene	1	433620	438080	NW_018743518.1	+	4461	2107	XP_010691555.1|9.7e-273|PREDICTED: nucleobase-ascorbate transporter 4 [Beta vulgaris subsp. vulgaris]
LOC110739984	XM_021920466.1	Known_gene	1	424765	427413	NW_018743518.1	-	2649	608	XP_021717139.1|1.5e-45|cysteine-rich and transmembrane domain-containing protein WIH2-like [Chenopodium quinoa]
LOC110739983	XM_021920465.1	Known_gene	1	403956	407159	NW_018743518.1	-	3204	787	XP_021776157.1|2.8e-55|cysteine-rich and transmembrane domain-containing protein WIH2-like [Chenopodium quinoa]
LOC110739982	XM_021920468.1,BGI_novel_T000576	Known_gene	2	2363228	2370464	NW_018742244.1	-	7237	2670	XP_021776160.1|0.0e+00|protein LNK1-like [Chenopodium quinoa]
LOC110739981	XM_021920463.1,BGI_novel_T005837,XM_021920464.1,BGI_novel_T005836	Known_gene	4	407918	416104	NW_018743518.1	+	8187	2081	XP_021776155.1|8.6e-118|uncharacterized protein LOC110739981 isoform X1 [Chenopodium quinoa]
LOC110739980	XM_021920462.1	Known_gene	1	407918	410555	NW_018743518.1	+	2638	2638	XP_021776154.1|8.7e-287|pentatricopeptide repeat-containing protein At1g74900, mitochondrial-like [Chenopodium quinoa]
LOC110739979	XM_021920461.1	Known_gene	1	387588	388914	NW_018743518.1	-	1327	1327	XP_021717135.1|6.0e-127|uncharacterized protein LOC110684988 [Chenopodium quinoa]
LOC110739978	BGI_novel_T005834,XM_021920460.1,BGI_novel_T005835	Known_gene	3	371762	382064	NW_018743518.1	+	10303	2665	XP_021776152.1|0.0e+00|myosin-9-like [Chenopodium quinoa]
LOC110739977	XM_021920459.1	Known_gene	1	346874	348249	NW_018743518.1	-	1376	1111	XP_021776151.1|7.2e-126|uncharacterized protein LOC110739977 [Chenopodium quinoa]
LOC110739976	XM_021920458.1	Known_gene	1	343237	346904	NW_018743518.1	+	3668	1161	XP_021776150.1|4.7e-152|mitochondrial outer membrane protein porin 2-like [Chenopodium quinoa]
LOC110739975	XM_021920456.1	Known_gene	1	319593	342634	NW_018743518.1	+	23042	5745	XP_021776148.1|0.0e+00|ABC transporter C family member 13-like [Chenopodium quinoa]
LOC110739974	XM_021920455.1	Known_gene	1	309420	313391	NW_018743518.1	+	3972	1456	XP_021776147.1|1.5e-243|probable N-acetyltransferase HLS1 [Chenopodium quinoa]
LOC110739973	XM_021920457.1	Known_gene	1	2359170	2362695	NW_018742244.1	+	3526	1066	XP_021776149.1|8.5e-124|uncharacterized protein LOC110739973 [Chenopodium quinoa]
LOC110739972	XM_021920489.1	Known_gene	1	18157925	18158428	NW_018742204.1	+	504	504	XP_021776181.1|3.4e-91|uncharacterized protein LOC110739972 [Chenopodium quinoa]
LOC110739971	BGI_novel_T005833,XM_021920454.1	Known_gene	2	313396	318931	NW_018743518.1	-	5536	1736	XP_021776146.1|8.6e-243|protein LOW PSII ACCUMULATION 3, chloroplastic-like [Chenopodium quinoa]
LOC110739969	XM_021920453.1	Known_gene	1	293649	296175	NW_018743518.1	+	2527	1699	XP_021776145.1|2.5e-271|photosynthetic NDH subunit of subcomplex B 1, chloroplastic-like [Chenopodium quinoa]
LOC110739968	XM_021920452.1	Known_gene	1	290762	293362	NW_018743518.1	+	2601	1604	XP_021776144.1|3.3e-249|G2/mitotic-specific cyclin S13-7-like [Chenopodium quinoa]
LOC110739967	XM_021920451.1,XM_021920450.1	Known_gene	2	280073	289687	NW_018743518.1	-	9615	1998	XP_021776142.1|2.4e-220|uncharacterized protein LOC110739967 isoform X1 [Chenopodium quinoa]
LOC110739966	XM_021920449.1	Known_gene	1	268478	270992	NW_018743518.1	+	2515	1812	XP_021776141.1|5.3e-203|probable WRKY transcription factor 40 [Chenopodium quinoa]
LOC110739965	XM_021920447.1	Known_gene	1	245599	247521	NW_018743518.1	-	1923	1923	XP_021776139.1|4.0e-257|CBL-interacting serine/threonine-protein kinase 25-like [Chenopodium quinoa]
LOC110739964	XM_021920446.1	Known_gene	1	229681	234080	NW_018743518.1	+	4400	1399	XP_021776138.1|1.2e-199|cinnamoyl-CoA reductase 1-like [Chenopodium quinoa]
LOC110739963	XM_021920445.1	Known_gene	1	234162	239703	NW_018743518.1	-	5542	2690	XP_010691589.1|2.5e-265|PREDICTED: metal transporter Nramp6 isoform X1 [Beta vulgaris subsp. vulgaris]
LOC110739962	XM_021920448.1	Known_gene	1	2350049	2357900	NW_018742244.1	-	7852	1868	XP_021860103.1|6.7e-209|endoplasmic reticulum-Golgi intermediate compartment protein 3-like [Spinacia oleracea]
LOC110739961	XM_021920443.1,BGI_novel_T005831,XM_021920444.1,XM_021920442.1	Known_gene	4	212222	221343	NW_018743518.1	+	9122	2595	XP_021776134.1|0.0e+00|uncharacterized protein LOC110739961 isoform X1 [Chenopodium quinoa]
LOC110739960	XM_021920441.1	Known_gene	1	197406	200186	NW_018743518.1	-	2781	1292	KNA18550.1|3.5e-132|hypothetical protein SOVF_069520, partial [Spinacia oleracea]
LOC110739958	XM_021920440.1	Known_gene	1	188749	190061	NW_018743518.1	-	1313	1223	XP_021776132.1|2.9e-160|probable CCR4-associated factor 1 homolog 7 [Chenopodium quinoa]
LOC110739957	XM_021920439.1	Known_gene	1	133694	141323	NW_018743518.1	-	7630	1278	XP_021776131.1|6.0e-116|Golgi SNAP receptor complex member 1-1-like [Chenopodium quinoa]
LOC110739956	XM_021920438.1	Known_gene	1	95788	97596	NW_018743518.1	+	1809	1115	XP_021776130.1|2.8e-130|uncharacterized protein At2g39795, mitochondrial-like [Chenopodium quinoa]
LOC110739955	XM_021920436.1,XM_021920435.1	Known_gene	2	84685	88647	NW_018743518.1	+	3963	1122	XP_021776127.1|1.1e-129|DCN1-like protein 4 isoform X1 [Chenopodium quinoa]
LOC110739954	XM_021920434.1,XM_021920433.1	Known_gene	2	69951	74008	NW_018743518.1	-	4058	2842	KNA18561.1|0.0e+00|hypothetical protein SOVF_069620 isoform B [Spinacia oleracea]
LOC110739953	XM_021920437.1	Known_gene	1	2345984	2349854	NW_018742244.1	+	3871	1692	XP_021776129.1|7.4e-239|uncharacterized protein LOC110739953 [Chenopodium quinoa]
LOC110739952	XM_021920432.1	Known_gene	1	976884	978554	NW_018745003.1	+	1671	1194	XP_021737972.1|4.3e-193|uncharacterized protein LOC110704494 [Chenopodium quinoa]
LOC110739951	XM_021920431.1,XM_021920429.1,XM_021920428.1,XM_021920430.1	Known_gene	4	48471	52862	NW_018743518.1	+	4392	3302	XP_021722214.1|0.0e+00|protein FAR1-RELATED SEQUENCE 5-like isoform X3 [Chenopodium quinoa]
LOC110739950	BGI_novel_T005830,XM_021920427.1	Known_gene	2	16252	41968	NW_018743518.1	-	25717	3147	XP_021866549.1|0.0e+00|V-type proton ATPase subunit a1 isoform X1 [Spinacia oleracea]
LOC110739949	XM_021920426.1,BGI_novel_T005829,XM_021920424.1,XM_021920425.1	Known_gene	4	3516	9969	NW_018743518.1	+	6454	2653	XP_021776116.1|1.8e-207|dehydrogenase/reductase SDR family member on chromosome X-like isoform X1 [Chenopodium quinoa]
LOC110739948	XM_021920423.1	Known_gene	1	12324	15098	NW_018743518.1	-	2775	1023	XP_021776115.1|6.3e-100|KH domain-containing protein At3g08620-like [Chenopodium quinoa]
LOC110739946	XM_021920422.1	Known_gene	1	1796841	1798568	NW_018743518.1	+	1728	1728	XP_021776114.1|4.2e-197|uncharacterized protein LOC110739946 [Chenopodium quinoa]
LOC110739945	XM_021920421.1	Known_gene	1	1676518	1678415	NW_018743518.1	+	1898	911	XP_021776113.1|3.6e-139|uncharacterized protein LOC110739945 [Chenopodium quinoa]
LOC110739944	XM_021920420.1	Known_gene	1	1629539	1631994	NW_018743518.1	+	2456	1628	XP_021776112.1|3.0e-274|cytochrome P450 87A3-like [Chenopodium quinoa]
LOC110739943	XM_021920419.1	Known_gene	1	1525433	1528094	NW_018743518.1	+	2662	1545	XP_021776111.1|4.0e-191|F-box/FBD/LRR-repeat protein At5g56420-like [Chenopodium quinoa]
LOC110739942	XM_021920418.1	Known_gene	1	1387386	1391725	NW_018743518.1	-	4340	1780	XP_021287420.1|1.7e-230|guanosine nucleotide diphosphate dissociation inhibitor At5g09550 [Herrania umbratica]
LOC110739941	XM_021920417.1	Known_gene	1	919779	927869	NW_018743518.1	-	8091	1841	XP_021776109.1|4.9e-204|transcription factor bHLH18-like [Chenopodium quinoa]
LOC110739938	XM_021920415.1	Known_gene	1	744715	745783	NW_018743518.1	+	1069	1069	XP_021776107.1|3.5e-93|pathogenesis-related protein 1B-like [Chenopodium quinoa]
LOC110739937	XM_021920414.1	Known_gene	1	727541	728460	NW_018743518.1	-	920	920	XP_021776106.1|6.7e-93|pathogenesis-related protein 1-like [Chenopodium quinoa]
LOC110739936	XM_021920413.1	Known_gene	1	723461	724300	NW_018743518.1	+	840	840	XP_021776105.1|6.5e-95|pathogenesis-related protein PRB1-3-like [Chenopodium quinoa]
LOC110739935	XM_021920416.1	Known_gene	1	2319750	2321820	NW_018742244.1	+	2071	1539	XP_021776108.1|2.3e-183|aquaporin-like [Chenopodium quinoa]
LOC110739934	XM_021920412.1	Known_gene	1	687295	688722	NW_018743518.1	+	1428	1428	XP_021776104.1|5.9e-96|basic form of pathogenesis-related protein 1-like, partial [Chenopodium quinoa]
LOC110739933	XM_021920411.1	Known_gene	1	681482	683417	NW_018743518.1	+	1936	1224	XP_021776103.1|4.4e-177|probable xyloglucan endotransglucosylase/hydrolase protein 10 [Chenopodium quinoa]
LOC110739932	XM_021920410.1	Known_gene	1	506854	508019	NW_018743518.1	-	1166	1166	XP_021776102.1|1.8e-26|uncharacterized protein LOC110739932 [Chenopodium quinoa]
LOC110739931	XM_021920409.1	Known_gene	1	468750	470976	NW_018743518.1	+	2227	1528	XP_021776101.1|5.5e-116|uncharacterized protein LOC110739931 [Chenopodium quinoa]
LOC110739930	XM_021920408.1	Known_gene	1	440576	442332	NW_018743518.1	-	1757	1448	XP_021776100.1|2.2e-215|1-aminocyclopropane-1-carboxylate oxidase-like [Chenopodium quinoa]
LOC110739928	XM_021920407.1	Known_gene	1	153050	154743	NW_018743518.1	-	1694	986	XP_021776099.1|3.5e-100|uncharacterized protein LOC110739928 [Chenopodium quinoa]
LOC110739927	BGI_novel_T005828,XM_021920405.1,XM_021920404.1	Known_gene	3	615836	645474	NW_018743516.1	-	29639	1615	XP_021776096.1|1.4e-93|uncharacterized protein LOC110739927 isoform X1 [Chenopodium quinoa]
LOC110739926	XM_021920403.1	Known_gene	1	451618	455775	NW_018743516.1	-	4158	1007	XP_021776095.1|1.1e-104|NEDD8-conjugating enzyme Ubc12-like [Chenopodium quinoa]
LOC110739925	XM_021920402.1	Known_gene	1	424087	431473	NW_018743516.1	-	7387	3291	XP_021776094.1|1.3e-143|late embryogenesis abundant protein D-34-like [Chenopodium quinoa]
LOC110739922	XM_021920400.1	Known_gene	1	182941	188213	NW_018743516.1	+	5273	1007	XP_021776092.1|2.0e-106|NEDD8-conjugating enzyme Ubc12-like [Chenopodium quinoa]
LOC110739921	XM_021920406.1,XM_021920401.1	Known_gene	2	2322153	2338307	NW_018742244.1	-	16155	1747	XP_021776093.1|1.0e-203|uncharacterized protein LOC110739921 isoform X1 [Chenopodium quinoa]
LOC110739920	XM_021920399.1	Known_gene	1	671295	689175	NW_018743516.1	-	17881	2310	XP_021776091.1|0.0e+00|uncharacterized protein LOC110739920 [Chenopodium quinoa]
LOC110739919	XM_021920398.1	Known_gene	1	598551	598943	NW_018743516.1	-	393	393	XP_021776090.1|2.1e-67|uncharacterized protein LOC110739919 [Chenopodium quinoa]
LOC110739916	XM_021920396.1	Known_gene	1	10548	17990	NW_018743515.1	-	7443	1543	XP_021776088.1|8.3e-213|uncharacterized protein LOC110739916 [Chenopodium quinoa]
LOC110739912	XM_021920394.1	Known_gene	1	1551097	1552622	NW_018743514.1	+	1526	1197	XP_021776086.1|8.3e-237|protein MAIN-LIKE 1-like [Chenopodium quinoa]
LOC110739911	XM_021920393.1	Known_gene	1	6240	8649	NW_018743525.1	+	2410	825	XP_021776085.1|1.0e-92|uncharacterized protein LOC110739911 [Chenopodium quinoa]
LOC110739910	XM_021920392.1	Known_gene	1	1531202	1533167	NW_018743514.1	-	1966	795	XP_021769727.1|1.4e-118|uncharacterized protein LOC110733968 [Chenopodium quinoa]
LOC110739909	XM_021920391.1	Known_gene	1	1492304	1507307	NW_018743514.1	-	15004	1108	XP_021776083.1|1.2e-200|uncharacterized protein LOC110739909 [Chenopodium quinoa]
LOC110739908	XM_021920390.1	Known_gene	1	1316232	1332366	NW_018743514.1	+	16135	1514	XP_021776082.1|3.3e-254|uncharacterized protein LOC110739908 [Chenopodium quinoa]
LOC110739907	XM_021920388.1	Known_gene	1	1303331	1304347	NW_018743514.1	-	1017	1017	XP_021776080.1|2.3e-195|uncharacterized protein LOC110739907 [Chenopodium quinoa]
LOC110739906	XM_021920387.1	Known_gene	1	1297237	1297971	NW_018743514.1	-	735	735	XP_021776079.1|3.5e-145|uncharacterized protein LOC110739906 [Chenopodium quinoa]
LOC110739905	XM_021920386.1	Known_gene	1	1143949	1144791	NW_018743514.1	-	843	843	XP_021776078.1|1.4e-158|uncharacterized protein LOC110739905 [Chenopodium quinoa]
LOC110739904	XM_021920385.1	Known_gene	1	1047361	1048017	NW_018743514.1	+	657	657	XP_021776077.1|1.9e-121|uncharacterized protein LOC110739904 [Chenopodium quinoa]
LOC110739903	XM_021920384.1	Known_gene	1	1028659	1030686	NW_018743514.1	-	2028	1116	XP_021776076.1|3.4e-160|putative B3 domain-containing protein Os03g0621600 [Chenopodium quinoa]
LOC110739902	XM_021920383.1,BGI_novel_T005810	Known_gene	2	883240	892529	NW_018743514.1	-	9290	3651	XP_021776075.1|9.3e-231|uncharacterized protein LOC110739902 [Chenopodium quinoa]
LOC110739901	XM_021920382.1	Known_gene	1	800054	801263	NW_018743514.1	-	1210	621	XP_021776074.1|1.4e-118|uncharacterized protein LOC110739901 [Chenopodium quinoa]
LOC110739900	XM_021920380.1	Known_gene	1	791082	793075	NW_018743514.1	+	1994	678	XP_021776072.1|3.5e-123|DNA damage-inducible protein 1-like [Chenopodium quinoa]
LOC110739899	XM_021920379.1	Known_gene	1	752194	753762	NW_018743514.1	+	1569	1569	XP_021776071.1|1.4e-303|F-box/LRR-repeat protein At3g26922-like [Chenopodium quinoa]
LOC110739897	XM_021920378.1	Known_gene	1	651241	652626	NW_018743514.1	+	1386	1386	XP_021776070.1|5.1e-270|F-box/FBD/LRR-repeat protein At1g16930-like [Chenopodium quinoa]
LOC110739896	XM_021920377.1	Known_gene	1	636811	638392	NW_018743514.1	+	1582	879	XP_021776069.1|1.6e-165|uncharacterized protein LOC110739896 [Chenopodium quinoa]
LOC110739895	XM_021920376.1	Known_gene	1	606541	607896	NW_018743514.1	-	1356	1356	XP_021776068.1|1.6e-260|F-box/LRR-repeat protein At3g26922-like [Chenopodium quinoa]
LOC110739894	XM_021920374.1	Known_gene	1	587114	587476	NW_018743514.1	-	363	363	XP_021776066.1|2.7e-66|uncharacterized protein LOC110739894 [Chenopodium quinoa]
LOC110739893	XM_021920373.1	Known_gene	1	570217	572083	NW_018743514.1	-	1867	1059	XP_021776065.1|4.8e-204|putative F-box/FBD/LRR-repeat protein At1g78760 [Chenopodium quinoa]
LOC110739892	XM_021920389.1,XM_021920397.1,XM_021920375.1,XM_021920381.1,BGI_novel_T000573,XM_021920395.1,BGI_novel_T000574	Known_gene	7	2303976	2312348	NW_018742244.1	-	8373	3023	XP_021776067.1|0.0e+00|diphthine--ammonia ligase-like isoform X1 [Chenopodium quinoa]
LOC110739891	XM_021920372.1	Known_gene	1	567970	569433	NW_018743514.1	-	1464	1464	XP_021776064.1|1.0e-284|F-box/LRR-repeat protein 13-like [Chenopodium quinoa]
LOC110739890	XM_021920371.1	Known_gene	1	557428	566238	NW_018743514.1	+	8811	2262	XP_008387148.1|3.4e-255|calcium-dependent protein kinase 20-like [Malus domestica]
LOC110739889	XM_021920370.1	Known_gene	1	173521	195688	NW_018743514.1	+	22168	477	XP_021776062.1|8.3e-87|uncharacterized protein LOC110739889 [Chenopodium quinoa]
LOC110739888	XM_021920369.1	Known_gene	1	148095	149102	NW_018743514.1	+	1008	1008	XP_021776061.1|2.3e-187|uncharacterized protein LOC110739888 [Chenopodium quinoa]
LOC110739887	XM_021920368.1	Known_gene	1	109322	111377	NW_018743514.1	-	2056	408	XP_021776060.1|5.4e-71|universal stress protein A-like protein [Chenopodium quinoa]
LOC110739886	XM_021920367.1	Known_gene	1	97871	98889	NW_018743514.1	-	1019	621	XP_021776059.1|1.8e-113|uncharacterized protein LOC110739886 [Chenopodium quinoa]
LOC110739885	XM_021920366.1	Known_gene	1	50018	50578	NW_018743514.1	+	561	561	XP_021776058.1|2.1e-110|uncharacterized protein LOC110739885 [Chenopodium quinoa]
LOC110739884	XM_021920364.1,BGI_novel_T005817	Known_gene	2	1708994	1715239	NW_018743514.1	-	6246	2347	XP_021714734.1|3.8e-124|protein FAR1-RELATED SEQUENCE 1-like [Chenopodium quinoa]
LOC110739883	XM_021920362.1,XM_021920363.1	Known_gene	2	1695289	1702651	NW_018743514.1	-	7363	1810	XP_021776054.1|1.2e-241|UDP-arabinose 4-epimerase 1-like [Chenopodium quinoa]
LOC110739882	XM_021920361.1	Known_gene	1	1691803	1693371	NW_018743514.1	+	1569	1569	XP_021776053.1|7.8e-227|uncharacterized protein LOC110739882 [Chenopodium quinoa]
LOC110739881	XM_021920360.1	Known_gene	1	1611427	1627936	NW_018743514.1	-	16510	3166	XP_021776052.1|0.0e+00|exocyst complex component SEC3A-like [Chenopodium quinoa]
LOC110739880	XM_021920359.1	Known_gene	1	1590930	1605537	NW_018743514.1	+	14608	1576	XP_021776051.1|1.5e-201|replication factor C subunit 3 [Chenopodium quinoa]
LOC110739879	BGI_novel_T005816,BGI_novel_T005815,BGI_novel_T005814,XM_021920358.1	Known_gene	4	1537782	1546750	NW_018743514.1	+	8969	3220	XP_021776048.1|0.0e+00|cationic amino acid transporter 4, vacuolar-like [Chenopodium quinoa]
LOC110739878	XM_021920356.1	Known_gene	1	1512147	1521012	NW_018743514.1	+	8866	2699	XP_021776048.1|0.0e+00|cationic amino acid transporter 4, vacuolar-like [Chenopodium quinoa]
LOC110739877	XM_021920355.1	Known_gene	1	1397113	1407279	NW_018743514.1	-	10167	1954	XP_021776047.1|1.5e-288|uncharacterized protein LOC110739877 [Chenopodium quinoa]
LOC110739875	XM_021920365.1,XM_021920357.1	Known_gene	2	2289643	2295033	NW_018742244.1	-	5391	1261	XP_021776049.1|1.3e-113|5'-methylthioadenosine/S-adenosylhomocysteine nucleosidase 1-like isoform X1 [Chenopodium quinoa]
LOC110739874	XM_021920354.1	Known_gene	1	1334104	1346103	NW_018743514.1	-	12000	2182	XP_021776046.1|0.0e+00|probable zinc metalloprotease EGY1, chloroplastic [Chenopodium quinoa]
LOC110739873	XM_021920353.1,BGI_novel_T005813	Known_gene	2	1305062	1312847	NW_018743514.1	-	7786	2053	XP_021776045.1|6.9e-158|LOB domain-containing protein 20-like [Chenopodium quinoa]
LOC110739872	XM_021920352.1	Known_gene	1	1308371	1312847	NW_018743514.1	-	4477	1041	XP_021776044.1|2.7e-199|histone-lysine N-methyltransferase SUVR3-like [Chenopodium quinoa]
LOC110739871	XM_021920351.1,BGI_novel_T005812	Known_gene	2	1274599	1279658	NW_018743514.1	+	5060	3330	XP_021776043.1|0.0e+00|probable inactive leucine-rich repeat receptor-like protein kinase At3g03770 [Chenopodium quinoa]
LOC110739869	XM_021920350.1	Known_gene	1	1154569	1169978	NW_018743514.1	+	15410	3293	XP_021776042.1|0.0e+00|protein RRP6-like 2 [Chenopodium quinoa]
LOC110739868	XM_021920348.1	Known_gene	1	1068748	1071490	NW_018743514.1	+	2743	2743	XP_021776040.1|2.6e-100|uncharacterized protein LOC110739868 [Chenopodium quinoa]
LOC110739867	XM_021920346.1,XM_021920347.1	Known_gene	2	1052537	1058207	NW_018743514.1	+	5671	713	XP_021721318.1|2.3e-56|dolichyl-diphosphooligosaccharide--protein glycosyltransferase subunit DAD1 [Chenopodium quinoa]
LOC110739866	XM_021920349.1	Known_gene	1	2286969	2288927	NW_018742244.1	-	1959	1477	XP_021753149.1|4.2e-222|type III polyketide synthase B-like [Chenopodium quinoa]
LOC110739865	XM_021920345.1	Known_gene	1	1030869	1036576	NW_018743514.1	+	5708	1726	XP_021721315.1|4.4e-247|probable sucrose-phosphatase 2 [Chenopodium quinoa]
LOC110739864	XM_021920344.1	Known_gene	1	980615	989189	NW_018743514.1	-	8575	2546	XP_021776036.1|0.0e+00|prolycopene isomerase, chloroplastic-like [Chenopodium quinoa]
LOC110739863	XM_021920343.1,XM_021920342.1	Known_gene	2	971095	980533	NW_018743514.1	+	9439	2619	XP_021858978.1|0.0e+00|ABC transporter G family member 22-like isoform X1 [Spinacia oleracea]
LOC110739861	XM_021920341.1	Known_gene	1	883240	885557	NW_018743514.1	-	2318	1115	XP_021771503.1|1.1e-155|uncharacterized protein LOC110735624 [Chenopodium quinoa]
LOC110739857	XM_021920339.1	Known_gene	1	707885	710406	NW_018743514.1	+	2522	1420	XP_021775120.1|8.7e-193|uncharacterized protein LOC110738988 isoform X1 [Chenopodium quinoa]
LOC110739855	XM_021920340.1	Known_gene	1	2276702	2278263	NW_018742244.1	+	1562	600	XP_021776032.1|9.4e-56|gibberellin-regulated protein 1-like [Chenopodium quinoa]
LOC110739854	XM_021920338.1	Known_gene	1	640318	644125	NW_018743514.1	+	3808	2137	XP_021776030.1|1.1e-295|F-box/LRR-repeat protein At3g26922-like [Chenopodium quinoa]
LOC110739851	XM_021920336.1,XM_021920337.1,XM_021920334.1,XM_021920335.1	Known_gene	4	450255	459431	NW_018743514.1	+	9177	2504	XP_021776026.1|0.0e+00|protein downstream neighbor of son homolog isoform X1 [Chenopodium quinoa]
LOC110739850	XM_021920333.1	Known_gene	1	434391	439752	NW_018743514.1	+	5362	2358	XP_021776025.1|5.5e-293|myosin-binding protein 7-like [Chenopodium quinoa]
LOC110739849	XM_021920331.1	Known_gene	1	414055	421180	NW_018743514.1	-	7126	1125	XP_021776023.1|5.1e-188|probable carboxylesterase 15 [Chenopodium quinoa]
LOC110739848	XM_021920330.1	Known_gene	1	394737	409506	NW_018743514.1	+	14770	2118	XP_010677608.1|1.1e-289|PREDICTED: D-lactate dehydrogenase [cytochrome], mitochondrial [Beta vulgaris subsp. vulgaris]
LOC110739846	XM_021920332.1	Known_gene	1	2267537	2269760	NW_018742244.1	-	2224	795	XP_021776024.1|4.3e-56|gibberellin-regulated protein 1-like [Chenopodium quinoa]
LOC110739845	XM_021920329.1,XM_021920328.1	Known_gene	2	266260	268522	NW_018743514.1	-	2263	1277	XP_021776020.1|3.2e-154|uncharacterized protein LOC110739845 [Chenopodium quinoa]
LOC110739844	XM_021920326.1,XM_021920327.1	Known_gene	2	256658	264139	NW_018743514.1	-	7482	1291	XP_021776018.1|1.9e-159|uncharacterized protein LOC110739844 [Chenopodium quinoa]
LOC110739843	XM_021920324.1,XM_021920325.1	Known_gene	2	225104	252124	NW_018743514.1	+	27021	4204	XP_010677617.1|0.0e+00|PREDICTED: ubiquitin carboxyl-terminal hydrolase 12 [Beta vulgaris subsp. vulgaris]
LOC110739842	XM_021920323.1	Known_gene	1	85703	92638	NW_018743514.1	-	6936	1197	XP_021776015.1|8.7e-194|uncharacterized protein LOC110739842 [Chenopodium quinoa]
LOC110739841	XM_021920322.1	Known_gene	1	75345	85041	NW_018743514.1	+	9697	1825	XP_021776014.1|2.7e-231|rhomboid-like protein 15 [Chenopodium quinoa]
LOC110739839	XM_021920320.1	Known_gene	1	44346	45128	NW_018743514.1	+	783	682	XP_021776012.1|8.3e-40|3-oxoacyl-[acyl-carrier-protein] synthase, mitochondrial-like [Chenopodium quinoa]
LOC110739838	XM_021920319.1	Known_gene	1	45804	48146	NW_018743514.1	-	2343	918	XP_021776011.1|7.7e-49|E3 ubiquitin-protein ligase COP1-like [Chenopodium quinoa]
LOC110739837	XM_021920321.1	Known_gene	1	2260360	2264470	NW_018742244.1	+	4111	2878	XP_021776013.1|0.0e+00|protein CHROMATIN REMODELING 35-like [Chenopodium quinoa]
LOC110739836	XM_021920318.1	Known_gene	1	1058784	1059986	NW_018743514.1	-	1203	967	XP_021776010.1|1.9e-69|uncharacterized protein LOC110739836 [Chenopodium quinoa]
LOC110739835	XM_021920317.1	Known_gene	1	253019	255954	NW_018743514.1	-	2936	1210	XP_021776009.1|9.1e-175|uncharacterized protein LOC110739835 [Chenopodium quinoa]
LOC110739834	XM_021920316.1,BGI_novel_T005808	Known_gene	2	100028	108072	NW_018743514.1	-	8045	1577	XP_021776008.1|1.3e-93|universal stress protein A-like protein [Chenopodium quinoa]
LOC110739831	XM_021920315.1,BGI_novel_T005804	Known_gene	2	5196208	5202330	NW_018743510.1	+	6123	4321	XP_021719683.1|2.2e-248|protein FAR1-RELATED SEQUENCE 5-like [Chenopodium quinoa]
LOC110739830	XM_021920314.1	Known_gene	1	5018276	5018830	NW_018743510.1	+	555	468	XP_021776006.1|2.7e-82|uncharacterized protein LOC110739830 [Chenopodium quinoa]
LOC110739829	XM_021920312.1	Known_gene	1	4909497	4910842	NW_018743510.1	+	1346	918	XP_021776004.1|1.7e-181|uncharacterized protein LOC110739829 [Chenopodium quinoa]
LOC110739828	XM_021920311.1	Known_gene	1	4755851	4757506	NW_018743510.1	-	1656	1221	XP_021776003.1|5.5e-236|uncharacterized protein LOC110739828 [Chenopodium quinoa]
LOC110739827	XM_021920313.1	Known_gene	1	2264608	2267237	NW_018742244.1	-	2630	2630	XP_021776005.1|0.0e+00|pentatricopeptide repeat-containing protein At1g11290, chloroplastic-like [Chenopodium quinoa]
LOC110739826	XM_021920310.1	Known_gene	1	4615911	4616710	NW_018743510.1	-	800	705	XP_021776002.1|3.7e-128|uncharacterized protein LOC110739826 [Chenopodium quinoa]
LOC110739825	XM_021920309.1	Known_gene	1	4371542	4374340	NW_018743510.1	-	2799	459	XP_021776001.1|1.4e-83|uncharacterized protein LOC110739825 [Chenopodium quinoa]
LOC110739824	XM_021920308.1,BGI_novel_T005790	Known_gene	2	4359808	4363334	NW_018743510.1	-	3527	2789	XP_021776000.1|4.4e-213|uncharacterized protein LOC110739824 [Chenopodium quinoa]
LOC110739823	XM_021920307.1	Known_gene	1	4355302	4357455	NW_018743510.1	+	2154	1404	XP_021775999.1|9.7e-269|zinc finger MYM-type protein 1-like [Chenopodium quinoa]
LOC110739822	XM_021920306.1	Known_gene	1	4280584	4281663	NW_018743510.1	-	1080	1080	XP_021775998.1|1.2e-215|uncharacterized protein LOC110739822 [Chenopodium quinoa]
LOC110739821	XM_021920303.1	Known_gene	1	4224122	4226781	NW_018743510.1	+	2660	1403	XP_021775995.1|5.3e-142|uncharacterized protein LOC110739821 [Chenopodium quinoa]
LOC110739820	XM_021920302.1	Known_gene	1	4125044	4128548	NW_018743510.1	-	3505	2313	XP_021775994.1|0.0e+00|uncharacterized protein LOC110739820 [Chenopodium quinoa]
LOC110739819	XM_021920301.1	Known_gene	1	4121897	4124794	NW_018743510.1	+	2898	1902	XP_021775993.1|0.0e+00|protein MAIN-LIKE 1-like [Chenopodium quinoa]
LOC110739818	XM_021920305.1	Known_gene	1	2249616	2254507	NW_018742244.1	+	4892	1501	XP_021753143.1|2.3e-151|putative ER lumen protein-retaining receptor C28H8.4 [Chenopodium quinoa]
LOC110739817	XM_021920300.1	Known_gene	1	4054056	4054604	NW_018743510.1	-	549	549	XP_021775992.1|1.2e-100|uncharacterized protein LOC110739817 [Chenopodium quinoa]
LOC110739816	XM_021920299.1	Known_gene	1	4046633	4047625	NW_018743510.1	+	993	993	XP_021775991.1|3.0e-200|uncharacterized protein LOC110739816 [Chenopodium quinoa]
LOC110739815	XM_021920298.1	Known_gene	1	3826164	3828821	NW_018743510.1	-	2658	2013	XP_021775990.1|0.0e+00|uncharacterized protein LOC110739815 [Chenopodium quinoa]
LOC110739814	XM_021920297.1	Known_gene	1	3623133	3624224	NW_018743510.1	-	1092	966	XP_021775989.1|8.0e-190|uncharacterized protein LOC110739814 [Chenopodium quinoa]
LOC110739813	XM_021920296.1	Known_gene	1	3621097	3622477	NW_018743510.1	-	1381	1290	XP_021775988.1|6.8e-253|uncharacterized protein LOC110739813 [Chenopodium quinoa]
LOC110739812	XM_021920294.1	Known_gene	1	3488352	3488840	NW_018743510.1	-	489	489	XP_021775986.1|3.7e-90|oral cancer-overexpressed protein 1 homolog [Chenopodium quinoa]
LOC110739811	XM_021920293.1	Known_gene	1	3438271	3442029	NW_018743510.1	-	3759	3262	XP_021775985.1|1.8e-140|uncharacterized protein LOC110739811 [Chenopodium quinoa]
LOC110739810	XM_021920292.1	Known_gene	1	3439574	3441201	NW_018743510.1	-	1628	735	XP_021775984.1|2.1e-142|F-box protein At2g32560-like [Chenopodium quinoa]
LOC110739809	XM_021920291.1,XM_021920295.1	Known_gene	2	2243495	2248549	NW_018742244.1	+	5055	2406	XP_021775983.1|0.0e+00|probable alkaline/neutral invertase B [Chenopodium quinoa]
LOC110739808	XM_021920290.1	Known_gene	1	3088233	3089669	NW_018743510.1	-	1437	1437	XP_021775982.1|3.3e-296|uncharacterized protein LOC110739808 [Chenopodium quinoa]
LOC110739807	XM_021920289.1	Known_gene	1	3037797	3038606	NW_018743510.1	+	810	810	XP_021775981.1|5.6e-152|uncharacterized protein LOC110739807 [Chenopodium quinoa]
LOC110739806	XM_021920288.1	Known_gene	1	2730549	2731432	NW_018743510.1	-	884	810	XP_021775980.1|1.4e-158|probable serine/threonine-protein kinase clkA [Chenopodium quinoa]
LOC110739805	XM_021920286.1	Known_gene	1	2711529	2714237	NW_018743510.1	+	2709	940	XP_021775978.1|2.0e-188|probable pectinesterase 66 [Chenopodium quinoa]
LOC110739804	XM_021920285.1	Known_gene	1	2547561	2548499	NW_018743510.1	+	939	939	XP_021775977.1|1.2e-182|glucuronoxylan 4-O-methyltransferase 1-like [Chenopodium quinoa]
LOC110739803	XM_021920287.1	Known_gene	1	2229599	2236097	NW_018742244.1	+	6499	1726	XP_021775979.1|2.1e-204|transcription factor GTE1-like [Chenopodium quinoa]
LOC110739802	XM_021920284.1	Known_gene	1	2510319	2510777	NW_018743510.1	+	459	459	XP_021775976.1|2.7e-87|uncharacterized protein LOC110739802 [Chenopodium quinoa]
LOC110739801	XM_021920283.1,XM_021920282.1	Known_gene	2	5316706	5324613	NW_018743510.1	+	7908	2014	XP_021775974.1|8.2e-311|eukaryotic translation initiation factor 3 subunit L-like isoform X1 [Chenopodium quinoa]
LOC110739800	XM_021920304.1	Known_gene	1	17997067	18017133	NW_018742204.1	-	20067	1281	XP_021775996.1|3.9e-248|F-box/FBD/LRR-repeat protein At1g13570-like [Chenopodium quinoa]
LOC110739797	XM_021920281.1	Known_gene	1	5281806	5291991	NW_018743510.1	-	10186	2837	XP_021775973.1|0.0e+00|TOM1-like protein 9 [Chenopodium quinoa]
LOC110739796	XM_021920280.1	Known_gene	1	5268751	5274667	NW_018743510.1	+	5917	1696	XP_021775972.1|1.3e-256|uncharacterized protein LOC110739796 [Chenopodium quinoa]
LOC110739795	XM_021920278.1	Known_gene	1	5258499	5267575	NW_018743510.1	+	9077	2452	XP_021775970.1|0.0e+00|protein tesmin/TSO1-like CXC 5 [Chenopodium quinoa]
LOC110739794	XM_021920277.1	Known_gene	1	5217495	5219685	NW_018743510.1	+	2191	1096	XP_021775964.1|2.3e-172|uncharacterized protein LOC110739789 [Chenopodium quinoa]
LOC110739793	XM_021920279.1	Known_gene	1	2214797	2226039	NW_018742244.1	-	11243	6888	XP_021775971.1|0.0e+00|LOW QUALITY PROTEIN: uncharacterized protein LOC110739793 [Chenopodium quinoa]
LOC110739792	XM_021920275.1,XM_021920276.1	Known_gene	2	5220473	5223645	NW_018743510.1	-	3173	1852	XP_021775967.1|0.0e+00|protein FAR1-RELATED SEQUENCE 5-like [Chenopodium quinoa]
LOC110739791	XM_021920274.1	Known_gene	1	5211765	5214192	NW_018743510.1	+	2428	1451	XP_021775966.1|1.9e-163|DNA ligase 1-like [Chenopodium quinoa]
LOC110739790	XM_021920273.1	Known_gene	1	5201143	5202330	NW_018743510.1	+	1188	706	XP_021775967.1|7.3e-116|protein FAR1-RELATED SEQUENCE 5-like [Chenopodium quinoa]
LOC110739789	XM_021920272.1	Known_gene	1	5217496	5219683	NW_018743510.1	+	2188	1093	XP_021775964.1|2.3e-172|uncharacterized protein LOC110739789 [Chenopodium quinoa]
LOC110739788	XM_021920268.1,BGI_novel_T005803,XM_021920270.1,XM_021920269.1,XM_021920271.1	Known_gene	5	5184717	5194286	NW_018743510.1	-	9570	2990	XP_021775963.1|0.0e+00|transcription factor GTE10-like isoform X2 [Chenopodium quinoa]
LOC110739786	XM_021920265.1,XM_021920266.1,XM_021920267.1,XM_021920264.1	Known_gene	4	5098779	5110102	NW_018743510.1	-	11324	2447	XP_021775956.1|4.3e-266|uncharacterized protein LOC110739786 [Chenopodium quinoa]
LOC110739785	XM_021920258.1,XM_021920263.1,XM_021920259.1,BGI_novel_T005802,BGI_novel_T005797,BGI_novel_T005801,XM_021920262.1,BGI_novel_T005798,XM_021920261.1,BGI_novel_T005799,XM_021920256.1,BGI_novel_T005800,XM_021920260.1	Known_gene	13	5086626	5091766	NW_018743510.1	+	5141	4681	XP_021775948.1|0.0e+00|cyclin-dependent kinase G-2-like isoform X1 [Chenopodium quinoa]
LOC110739784	XM_021920255.1	Known_gene	1	5053138	5056858	NW_018743510.1	-	3721	2041	XP_021775947.1|0.0e+00|malate synthase, glyoxysomal-like [Chenopodium quinoa]
LOC110739783	XM_021920254.1	Known_gene	1	4978845	4988074	NW_018743510.1	+	9230	2126	XP_021775946.1|0.0e+00|4-coumarate--CoA ligase-like 9 [Chenopodium quinoa]
LOC110739782	XM_021920257.1	Known_gene	1	2148369	2152461	NW_018742244.1	+	4093	774	XP_021775949.1|1.1e-85|uncharacterized protein LOC110739782 [Chenopodium quinoa]
LOC110739780	XM_021920253.1,XM_021920252.1	Known_gene	2	4896888	4901962	NW_018743510.1	-	5075	2002	XP_021775944.1|8.5e-218|enoyl-[acyl-carrier-protein] reductase [NADH] 1, chloroplastic-like [Chenopodium quinoa]
LOC110739779	XM_021920251.1	Known_gene	1	4887824	4891388	NW_018743510.1	+	3565	1825	XP_021775943.1|9.3e-288|7-deoxyloganetic acid glucosyltransferase-like [Chenopodium quinoa]
LOC110739778	XM_021920249.1	Known_gene	1	4870566	4872964	NW_018743510.1	-	2399	2049	XP_021775941.1|3.6e-288|7-deoxyloganetic acid glucosyltransferase-like [Chenopodium quinoa]
LOC110739776	XM_021920248.1	Known_gene	1	4805403	4808296	NW_018743510.1	+	2894	1885	XP_021775940.1|7.0e-299|cytochrome P450 CYP72A219-like [Chenopodium quinoa]
LOC110739775	XM_021920250.1	Known_gene	1	2146748	2148285	NW_018742244.1	+	1538	1538	XP_021775942.1|3.5e-131|uncharacterized protein LOC110739775 [Chenopodium quinoa]
LOC110739774	XM_021920247.1	Known_gene	1	4760829	4770655	NW_018743510.1	-	9827	1956	XP_021775939.1|2.0e-211|probable S-adenosylmethionine-dependent methyltransferase At5g38100 [Chenopodium quinoa]
LOC110739772	XM_021920246.1	Known_gene	1	4517139	4529213	NW_018743510.1	-	12075	2105	XP_021775938.1|2.0e-132|U1 small nuclear ribonucleoprotein C-like [Chenopodium quinoa]
LOC110739770	XM_021920244.1	Known_gene	1	4469649	4472300	NW_018743510.1	-	2652	2000	XP_021775936.1|0.0e+00|uncharacterized protein At1g04910 [Chenopodium quinoa]
LOC110739769	XM_021920243.1	Known_gene	1	4424021	4429805	NW_018743510.1	+	5785	2075	XP_021775935.1|0.0e+00|beta-glucosidase 13-like [Chenopodium quinoa]
LOC110739768	XM_021920245.1	Known_gene	1	2139531	2145860	NW_018742244.1	+	6330	1318	XP_021775937.1|6.7e-179|triosephosphate isomerase, chloroplastic [Chenopodium quinoa]
LOC110739767	XM_021920242.1,BGI_novel_T005791	Known_gene	2	4379913	4390423	NW_018743510.1	+	10511	1994	XP_021775934.1|0.0e+00|beta-glucosidase 13-like [Chenopodium quinoa]
LOC110739766	XM_021920240.1,XM_021920241.1	Known_gene	2	4361229	4363334	NW_018743510.1	-	2106	1725	XP_021760648.1|9.1e-152|uncharacterized protein LOC110725487 [Chenopodium quinoa]
LOC110739765	XM_021920239.1	Known_gene	1	4367309	4369685	NW_018743510.1	-	2377	2077	XP_021760648.1|0.0e+00|uncharacterized protein LOC110725487 [Chenopodium quinoa]
LOC110739763	XM_021920238.1	Known_gene	1	4247581	4272051	NW_018743510.1	-	24471	2031	XP_021775930.1|0.0e+00|beta-glucosidase 13-like [Chenopodium quinoa]
LOC110739761	XM_021920237.1	Known_gene	1	4116974	4121378	NW_018743510.1	-	4405	1698	XP_021775929.1|2.2e-214|probable RNA 3'-terminal phosphate cyclase-like protein [Chenopodium quinoa]
LOC110739760	XM_021920235.1	Known_gene	1	4101733	4109127	NW_018743510.1	+	7395	1910	XP_021775927.1|2.1e-282|probable aspartyl aminopeptidase [Chenopodium quinoa]
LOC110739759	XM_021920234.1	Known_gene	1	4064754	4070741	NW_018743510.1	+	5988	1199	XP_021775926.1|1.7e-133|adenylate kinase 4 [Chenopodium quinoa]
LOC110739758	XM_021920233.1	Known_gene	1	4059588	4063168	NW_018743510.1	+	3581	2091	XP_021775925.1|4.9e-309|nucleolar protein 56-like [Chenopodium quinoa]
LOC110739757	XM_021920236.1	Known_gene	1	2135392	2138691	NW_018742244.1	+	3300	1423	XP_021775928.1|2.6e-160|transcription factor bHLH121-like [Chenopodium quinoa]
LOC110739756	XM_021920232.1	Known_gene	1	3939067	3943718	NW_018743510.1	+	4652	2360	XP_021775924.1|1.5e-218|F-box/kelch-repeat protein At3g23880-like [Chenopodium quinoa]
LOC110739754	XM_021920231.1	Known_gene	1	3858600	3863322	NW_018743510.1	+	4723	1423	XP_021775923.1|3.4e-160|probable adenylate kinase 7, mitochondrial [Chenopodium quinoa]
LOC110739753	XM_021920229.1,XM_021920230.1,BGI_novel_T005789	Known_gene	3	3863271	3868389	NW_018743510.1	-	5119	3810	XP_021775922.1|0.0e+00|probable inactive leucine-rich repeat receptor-like protein kinase At3g03770 isoform X2 [Chenopodium quinoa]
LOC110739752	XM_021920228.1,BGI_novel_T005788,XM_021920227.1,XM_021920226.1	Known_gene	4	3808389	3820026	NW_018743510.1	-	11638	3400	XP_021775918.1|0.0e+00|uncharacterized protein LOC110739752 isoform X1 [Chenopodium quinoa]
LOC110739751	XM_021920224.1,BGI_novel_T005787,XM_021920223.1	Known_gene	3	3738195	3753183	NW_018743510.1	+	14989	4396	XP_021775915.1|0.0e+00|uncharacterized protein LOC110739751 isoform X1 [Chenopodium quinoa]
LOC110739750	XM_021920222.1,XM_021920221.1	Known_gene	2	3660366	3671839	NW_018743510.1	-	11474	1285	XP_021775914.1|3.9e-115|UPF0235 protein At5g63440 isoform X2 [Chenopodium quinoa]
LOC110739749	XM_021920225.1	Known_gene	1	2127907	2134035	NW_018742244.1	-	6129	2334	XP_021775917.1|0.0e+00|U3 small nucleolar ribonucleoprotein protein MPP10-like [Chenopodium quinoa]
LOC110739748	XM_021920220.1	Known_gene	1	3626942	3629959	NW_018743510.1	+	3018	922	XP_021759408.1|2.3e-93|60S ribosomal protein L17-2 [Chenopodium quinoa]
LOC110739747	BGI_novel_T005786,XM_021920213.1,XM_021920214.1,XM_021920217.1,XM_021920218.1,XM_021920212.1,XM_021920215.1,XM_021920219.1	Known_gene	8	3606333	3617849	NW_018743510.1	-	11517	6704	XP_021719084.1|1.9e-265|uncharacterized protein LOC110686804 [Chenopodium quinoa]
LOC110739746	XM_021920210.1	Known_gene	1	3484965	3489437	NW_018743510.1	-	4473	2075	XP_021775902.1|7.1e-167|LOW QUALITY PROTEIN: formimidoyltransferase-cyclodeaminase-like [Chenopodium quinoa]
LOC110739743	XM_021920209.1	Known_gene	1	3454694	3460785	NW_018743510.1	+	6092	2225	XP_021775901.1|4.9e-307|cytochrome P450 94B3-like [Chenopodium quinoa]
LOC110739742	XM_021920211.1	Known_gene	1	2123805	2127240	NW_018742244.1	+	3436	1271	XP_021775903.1|4.9e-110|uncharacterized protein LOC110739742 [Chenopodium quinoa]
LOC110739741	XM_021920208.1	Known_gene	1	3441882	3443288	NW_018743510.1	-	1407	1238	XP_021763883.1|3.1e-85|alanine--glyoxylate aminotransferase 2 homolog 1, mitochondrial-like isoform X2 [Chenopodium quinoa]
LOC110739738	XM_021920207.1	Known_gene	1	3357828	3374001	NW_018743510.1	+	16174	1053	XP_021775899.1|2.4e-94|uncharacterized protein LOC110739738 [Chenopodium quinoa]
LOC110739736	XM_021920206.1	Known_gene	1	3282140	3286450	NW_018743510.1	-	4311	1734	XP_021775898.1|3.7e-246|SNF1-related protein kinase regulatory subunit gamma-1-like [Chenopodium quinoa]
LOC110739733	XM_021920205.1	Known_gene	1	2113367	2120161	NW_018742244.1	-	6795	1476	XP_021775897.1|1.9e-190|protein XAP5 CIRCADIAN TIMEKEEPER-like [Chenopodium quinoa]
LOC110739732	XM_021920203.1,XM_021920204.1,BGI_novel_T005780,BGI_novel_T005781	Known_gene	4	3188417	3194254	NW_018743510.1	-	5838	2001	XP_021775895.1|6.1e-216|uncharacterized protein LOC110739732 [Chenopodium quinoa]
LOC110739730	XM_021920202.1	Known_gene	1	3133148	3137779	NW_018743510.1	-	4632	1542	XP_021741395.1|6.1e-107|probable serine/threonine-protein kinase vps15 [Chenopodium quinoa]
LOC110739729	XM_021920201.1,XM_021920200.1	Known_gene	2	2961240	2985576	NW_018743510.1	-	24337	1913	XP_021775892.1|9.2e-254|snurportin-1-like isoform X1 [Chenopodium quinoa]
LOC110739728	XM_021920199.1	Known_gene	1	2951994	2960590	NW_018743510.1	+	8597	2594	XP_010677881.1|0.0e+00|PREDICTED: probable inactive purple acid phosphatase 27 isoform X1 [Beta vulgaris subsp. vulgaris]
LOC110739726	XM_021920196.1,XM_021920197.1,XM_021920195.1	Known_gene	3	2935976	2941314	NW_018743510.1	+	5339	3606	XP_021775887.1|0.0e+00|nucleotide pyrophosphatase/phosphodiesterase-like isoform X1 [Chenopodium quinoa]
LOC110739725	XM_021920198.1	Known_gene	1	2108094	2112219	NW_018742244.1	-	4126	1191	XP_021775890.1|3.9e-138|translocon-associated protein subunit alpha-like [Chenopodium quinoa]
LOC110739724	XM_021920193.1,XM_021920194.1	Known_gene	2	2931119	2935023	NW_018743510.1	+	3905	884	XP_021775885.1|1.4e-87|uncharacterized protein LOC110739724 isoform X1 [Chenopodium quinoa]
LOC110739723	XM_021920191.1,XM_021920192.1	Known_gene	2	2839294	2844519	NW_018743510.1	-	5226	3658	XP_021737446.1|0.0e+00|leucine--tRNA ligase, cytoplasmic-like [Chenopodium quinoa]
LOC110739722	XM_021920190.1	Known_gene	1	2825101	2835648	NW_018743510.1	-	10548	2400	XP_021775882.1|4.7e-239|ubiquitin-like modifier-activating enzyme 5 [Chenopodium quinoa]
LOC110739719	XM_021920189.1,BGI_novel_T005774,XM_021920188.1	Known_gene	3	2547085	2566361	NW_018743510.1	-	19277	2463	XP_021775880.1|3.1e-262|TITAN-like protein [Chenopodium quinoa]
LOC110739718	XM_021920187.1	Known_gene	1	2544222	2546681	NW_018743510.1	+	2460	2460	XP_021775879.1|0.0e+00|acetolactate synthase 1, chloroplastic-like [Chenopodium quinoa]
LOC110739717	XM_021920185.1	Known_gene	1	2462265	2468205	NW_018743510.1	+	5941	633	XP_021737459.1|6.1e-29|stress-associated endoplasmic reticulum protein 2-like [Chenopodium quinoa]
LOC110739716	XM_021920184.1	Known_gene	1	2395554	2400275	NW_018743510.1	+	4722	723	XP_021744469.1|5.3e-53|uncharacterized protein LOC110710472 [Chenopodium quinoa]
LOC110739715	XM_021920183.1	Known_gene	1	2373432	2378855	NW_018743510.1	+	5424	1467	XP_021775875.1|8.0e-149|nuclear transcription factor Y subunit C-1-like [Chenopodium quinoa]
LOC110739714	XM_021920186.1	Known_gene	1	2104133	2105856	NW_018742244.1	-	1724	1640	XP_021775878.1|2.9e-240|proline-rich protein 4-like [Chenopodium quinoa]
LOC110739713	XM_021920180.1,XM_021920182.1,BGI_novel_T005772,XM_021920181.1,BGI_novel_T005773	Known_gene	5	2287572	2292464	NW_018743510.1	-	4893	2770	XP_021775872.1|1.1e-74|ubiquinol oxidase 2, mitochondrial-like [Chenopodium quinoa]
LOC110739712	XM_021920178.1,XM_021920179.1	Known_gene	2	2262354	2267372	NW_018743510.1	+	5019	3082	XP_021775870.1|0.0e+00|uncharacterized protein LOC110739712 isoform X1 [Chenopodium quinoa]
LOC110739710	XM_021920177.1	Known_gene	1	2238680	2241990	NW_018743510.1	-	3311	1127	XP_021775869.1|5.4e-129|thylakoid lumenal 17.9 kDa protein, chloroplastic-like [Chenopodium quinoa]
LOC110739709	XM_021920176.1	Known_gene	1	2188940	2199017	NW_018743510.1	+	10078	3430	XP_021775868.1|0.0e+00|sec1 family domain-containing protein MIP3-like [Chenopodium quinoa]
LOC110739707	XM_021920175.1	Known_gene	1	2076610	2077510	NW_018742244.1	-	901	901	XP_021775867.1|4.4e-97|peptidyl-prolyl cis-trans isomerase 1 [Chenopodium quinoa]
LOC110739706	XM_021920169.1,XM_021920171.1,XM_021920168.1,XM_021920173.1,XM_021920172.1,XM_021920174.1,XM_021920170.1	Known_gene	7	2104645	2116555	NW_018743510.1	-	11911	1685	XP_021775865.1|4.8e-256|phospholipase A1-IIdelta-like isoform X6 [Chenopodium quinoa]
LOC110739702	BGI_novel_T005767,XM_021920165.1,XM_021920161.1,XM_021920162.1,XM_021920164.1,XM_021920163.1,BGI_novel_T005768,BGI_novel_T005766,XM_021920166.1,XM_021920160.1,XM_021920159.1	Known_gene	11	2011257	2020175	NW_018743510.1	+	8919	4810	XP_021775858.1|2.5e-78|uncharacterized protein LOC110739702 isoform X2 [Chenopodium quinoa]
LOC110739701	XM_021920157.1	Known_gene	1	1996943	2000120	NW_018743510.1	+	3178	2111	XP_021775849.1|1.4e-255|protein ALP1-like [Chenopodium quinoa]
LOC110739700	XM_021920156.1	Known_gene	1	1989842	1994246	NW_018743510.1	+	4405	2065	XP_021775848.1|9.4e-305|non-specific phospholipase C6-like [Chenopodium quinoa]
LOC110739698	XM_021920167.1,XM_021920158.1,BGI_novel_T000569	Known_gene	3	2078601	2103089	NW_018742244.1	-	24489	6739	XP_021775850.1|0.0e+00|uncharacterized protein LOC110739698 isoform X1 [Chenopodium quinoa]
LOC110739697	XM_021920155.1	Known_gene	1	1937076	1937897	NW_018743510.1	-	822	822	XP_021775847.1|1.4e-30|uncharacterized protein LOC110739697 [Chenopodium quinoa]
LOC110739696	XM_021920154.1	Known_gene	1	1887149	1894253	NW_018743510.1	-	7105	1296	XP_021775846.1|5.4e-149|gamma carbonic anhydrase-like 2, mitochondrial [Chenopodium quinoa]
LOC110739693	XM_021920153.1	Known_gene	1	1844533	1845893	NW_018743510.1	-	1361	1271	XP_021775845.1|2.1e-238|uncharacterized protein LOC110739693 [Chenopodium quinoa]
LOC110739692	XM_021920152.1	Known_gene	1	1789641	1810488	NW_018743510.1	+	20848	3002	XP_021775844.1|5.2e-296|F-box/LRR-repeat protein At5g63520-like [Chenopodium quinoa]
LOC110739691	XM_021920151.1	Known_gene	1	1663678	1670628	NW_018743510.1	+	6951	1262	XP_021775843.1|2.8e-110|probable WRKY transcription factor 75 [Chenopodium quinoa]
LOC110739690	XM_021920150.1,BGI_novel_T000568	Known_gene	2	2061807	2069191	NW_018742244.1	-	7385	3930	XP_021775842.1|1.8e-182|uncharacterized protein LOC110739690 [Chenopodium quinoa]
LOC110739689	XM_021920149.1,XM_021920148.1,BGI_novel_T005759,XM_021920147.1	Known_gene	4	1517086	1521157	NW_018743510.1	+	4072	2771	XP_021758425.1|7.1e-122|transcription factor TCP20-like [Chenopodium quinoa]
LOC110739688	XM_021920145.1,XM_021920144.1,XM_021920146.1,BGI_novel_T005760	Known_gene	4	1520966	1526548	NW_018743510.1	-	5583	2145	XP_021775838.1|0.0e+00|SWI/SNF complex subunit SWI3A-like isoform X2 [Chenopodium quinoa]
LOC110739687	BGI_novel_T005757,XM_021920143.1	Known_gene	2	1482785	1487311	NW_018743510.1	+	4527	1802	XP_021775835.1|4.2e-192|11-beta-hydroxysteroid dehydrogenase 1B-like [Chenopodium quinoa]
LOC110739686	XM_021920142.1	Known_gene	1	1487932	1496849	NW_018743510.1	-	8918	2216	XP_021775834.1|0.0e+00|recQ-mediated genome instability protein 1-like [Chenopodium quinoa]
LOC110739685	XM_021920141.1	Known_gene	1	1468710	1478089	NW_018743510.1	+	9380	1312	XP_021775833.1|7.1e-197|11-beta-hydroxysteroid dehydrogenase 1B-like [Chenopodium quinoa]
LOC110739684	XM_021920139.1	Known_gene	1	1446415	1460666	NW_018743510.1	-	14252	2325	XP_021737489.1|6.5e-161|mediator of RNA polymerase II transcription subunit 15-like [Chenopodium quinoa]
LOC110739683	XM_021920138.1	Known_gene	1	1425105	1429300	NW_018743510.1	+	4196	1614	XP_021775830.1|2.3e-197|11-beta-hydroxysteroid dehydrogenase 1B-like [Chenopodium quinoa]
LOC110739682	XM_021920140.1	Known_gene	1	2061989	2064730	NW_018742244.1	-	2742	2742	XP_021775832.1|0.0e+00|berberine bridge enzyme-like 13 [Chenopodium quinoa]
LOC110739681	XM_021920137.1,XM_021920136.1	Known_gene	2	1306042	1308367	NW_018743510.1	+	2326	785	XP_021775828.1|1.8e-64|HVA22-like protein e isoform X1 [Chenopodium quinoa]
LOC110739680	XM_021920135.1	Known_gene	1	1276882	1282192	NW_018743510.1	-	5311	1642	XP_021775827.1|2.5e-220|palmitoyl-acyl carrier protein thioesterase, chloroplastic-like [Chenopodium quinoa]
LOC110739679	XM_021920134.1	Known_gene	1	1265321	1267923	NW_018743510.1	+	2603	1747	XP_021775826.1|4.2e-205|heavy metal-associated isoprenylated plant protein 7-like [Chenopodium quinoa]
LOC110739677	XM_021920133.1,XM_021920132.1	Known_gene	2	1133379	1150071	NW_018743510.1	-	16693	2376	XP_021775824.1|3.1e-299|protein DEK-like isoform X1 [Chenopodium quinoa]
LOC110739676	XM_021920131.1,XM_021920130.1	Known_gene	2	1079291	1081950	NW_018743510.1	-	2660	1905	XP_021846196.1|2.7e-229|omega-hydroxypalmitate O-feruloyl transferase-like [Spinacia oleracea]
LOC110739675	XM_021920128.1	Known_gene	1	1048130	1058982	NW_018743510.1	-	10853	3505	XP_021775820.1|0.0e+00|protein MICRORCHIDIA 7-like [Chenopodium quinoa]
LOC110739673	XM_021920127.1,BGI_novel_T005754	Known_gene	2	947382	977132	NW_018743510.1	-	29751	1867	XP_021775819.1|1.4e-275|glutamate-1-semialdehyde 2,1-aminomutase, chloroplastic-like [Chenopodium quinoa]
LOC110739672	XM_021920129.1	Known_gene	1	2036085	2041612	NW_018742244.1	+	5528	3270	XP_021775821.1|3.7e-263|F-box/LRR-repeat protein At3g59210-like [Chenopodium quinoa]
LOC110739670	XM_021920126.1	Known_gene	1	919880	924596	NW_018743510.1	+	4717	1148	XP_021737440.1|2.4e-60|membrane-anchored ubiquitin-fold protein 3-like isoform X2 [Chenopodium quinoa]
LOC110739669	XM_021920125.1	Known_gene	1	861945	881541	NW_018743510.1	-	19597	1637	XP_021775817.1|4.0e-242|RNA pseudouridine synthase 7-like [Chenopodium quinoa]
LOC110739668	BGI_novel_T005752,XM_021920124.1	Known_gene	2	845581	855669	NW_018743510.1	-	10089	1776	XP_021775816.1|8.3e-217|mRNA cap guanine-N7 methyltransferase 1-like [Chenopodium quinoa]
LOC110739667	XM_021920123.1	Known_gene	1	830265	832576	NW_018743510.1	+	2312	1354	XP_021775815.1|1.4e-171|bidirectional sugar transporter SWEET12-like [Chenopodium quinoa]
LOC110739666	XM_021920122.1	Known_gene	1	756554	759832	NW_018743510.1	+	3279	1430	XP_021775814.1|4.9e-175|bidirectional sugar transporter N3-like [Chenopodium quinoa]
LOC110739665	XM_021920121.1	Known_gene	1	700941	702656	NW_018743510.1	-	1716	1633	XP_021761405.1|6.9e-133|protein ALP1-like [Chenopodium quinoa]
LOC110739664	XM_021920119.1	Known_gene	1	698112	700850	NW_018743510.1	-	2739	1558	XP_021757823.1|6.2e-192|uncharacterized protein LOC110722831 [Chenopodium quinoa]
LOC110739663	XM_021920118.1	Known_gene	1	694826	697334	NW_018743510.1	+	2509	1835	XP_021745708.1|5.6e-293|heat stress transcription factor A-5-like [Chenopodium quinoa]
LOC110739662	XM_021920116.1,BGI_novel_T005749,XM_021920117.1,BGI_novel_T005750	Known_gene	4	677890	687269	NW_018743510.1	-	9380	3658	XP_021775808.1|0.0e+00|CRM-domain containing factor CFM3A, chloroplastic/mitochondrial-like [Chenopodium quinoa]
LOC110739661	XM_021920120.1	Known_gene	1	2031423	2034618	NW_018742244.1	+	3196	1374	XP_021775812.1|4.7e-159|tetraspanin-2-like [Chenopodium quinoa]
LOC110739660	XM_021920115.1	Known_gene	1	631638	635549	NW_018743510.1	+	3912	939	XP_021737427.1|8.5e-35|mitochondrial import inner membrane translocase subunit TIM8-like [Chenopodium quinoa]
LOC110739659	XM_021920114.1	Known_gene	1	423278	424921	NW_018743510.1	+	1644	1108	XP_021775806.1|8.0e-210|sorbitol dehydrogenase-like [Chenopodium quinoa]
LOC110739658	XM_021920113.1	Known_gene	1	430399	432279	NW_018743510.1	-	1881	1363	XP_021775805.1|3.4e-210|sorbitol dehydrogenase-like [Chenopodium quinoa]
LOC110739657	BGI_novel_T005746,XM_021920111.1,XM_021920112.1	Known_gene	3	464985	474198	NW_018743510.1	-	9214	1873	XP_021775803.1|1.7e-205|pyruvate dehydrogenase E1 component subunit beta-1, mitochondrial-like [Chenopodium quinoa]
LOC110739656	XM_021920110.1	Known_gene	1	414467	421780	NW_018743510.1	+	7314	2548	XP_021775802.1|0.0e+00|probable serine/threonine-protein kinase At1g54610 [Chenopodium quinoa]
LOC110739655	XM_021920109.1,XM_021920106.1,BGI_novel_T005747,XM_021920107.1	Known_gene	4	488018	502252	NW_018743510.1	-	14235	3086	XP_021775798.1|0.0e+00|cell division cycle protein 27 homolog B-like isoform X1 [Chenopodium quinoa]
LOC110739654	XM_021920103.1,XM_021920104.1,XM_021920105.1	Known_gene	3	506735	525381	NW_018743510.1	+	18647	7771	XP_021775796.1|0.0e+00|uncharacterized protein LOC110739654 isoform X2 [Chenopodium quinoa]
LOC110739653	BGI_novel_T005745,BGI_novel_T005744,XM_021920101.1,XM_021920102.1,BGI_novel_T005743	Known_gene	5	382953	390701	NW_018743510.1	+	7749	1231	XP_021775793.1|2.4e-106|ubiquitin-conjugating enzyme E2 27-like [Chenopodium quinoa]
LOC110739652	XM_021920100.1	Known_gene	1	340740	349909	NW_018743510.1	-	9170	3438	XP_021775792.1|0.0e+00|uncharacterized protein LOC110739652 [Chenopodium quinoa]
LOC110739651	XM_021920098.1	Known_gene	1	290490	292627	NW_018743510.1	+	2138	2138	XP_021737404.1|2.4e-303|armadillo segment polarity protein-like [Chenopodium quinoa]
LOC110739649	BGI_novel_T005740,XM_021920097.1,BGI_novel_T005741	Known_gene	3	201594	205049	NW_018743510.1	-	3456	1031	XP_021775789.1|8.0e-103|translocon-associated protein subunit beta-like [Chenopodium quinoa]
LOC110739648	XM_021920099.1,XM_021920108.1	Known_gene	2	2024584	2030748	NW_018742244.1	-	6165	2074	XP_021846767.1|1.7e-176|probable magnesium transporter NIPA6 isoform X1 [Spinacia oleracea]
LOC110739647	XM_021920096.1	Known_gene	1	144070	145133	NW_018743510.1	-	1064	626	XP_021775788.1|3.6e-50|putative caffeoyl-CoA O-methyltransferase At1g67980 [Chenopodium quinoa]
LOC110739645	XM_021920095.1	Known_gene	1	36066	44404	NW_018743510.1	-	8339	2201	XP_021775787.1|4.4e-284|long chain base biosynthesis protein 2a-like [Chenopodium quinoa]
LOC110739644	XM_021920093.1,XM_021920094.1	Known_gene	2	25180	32672	NW_018743510.1	-	7493	2061	XP_021775785.1|2.0e-217|sialyltransferase-like protein 2 isoform X1 [Chenopodium quinoa]
LOC110739643	XM_021920092.1	Known_gene	1	20406	21892	NW_018743510.1	-	1487	1399	XP_021714686.1|4.3e-261|PKS-NRPS hybrid synthetase CHGG_01239-like [Chenopodium quinoa]
LOC110739642	XM_021920091.1	Known_gene	1	19345	20333	NW_018743510.1	+	989	826	XP_021739073.1|2.7e-154|protein MAINTENANCE OF MERISTEMS-like [Chenopodium quinoa]
LOC110739641	XM_021920089.1	Known_gene	1	2391046	2392867	NW_018743510.1	+	1822	1335	XP_021775781.1|1.1e-258|zinc finger MYM-type protein 1-like [Chenopodium quinoa]
LOC110739640	XM_021920088.1	Known_gene	1	2328863	2329777	NW_018743510.1	-	915	915	XP_021775780.1|1.7e-181|uncharacterized protein LOC110739640 [Chenopodium quinoa]
LOC110739639	XM_021920090.1	Known_gene	1	1988789	1991842	NW_018742244.1	-	3054	1819	XP_021775782.1|6.7e-238|eukaryotic translation initiation factor 4B3 [Chenopodium quinoa]
LOC110739638	XM_021920087.1	Known_gene	1	2156027	2156838	NW_018743510.1	-	812	666	XP_021775779.1|4.5e-131|protein FAR1-RELATED SEQUENCE 5-like [Chenopodium quinoa]
LOC110739637	XM_021920086.1	Known_gene	1	2131149	2131610	NW_018743510.1	-	462	462	XP_021775778.1|2.0e-82|uncharacterized protein LOC110739637 [Chenopodium quinoa]
LOC110739636	XM_021920085.1	Known_gene	1	2086824	2087514	NW_018743510.1	-	691	573	XP_021775777.1|1.2e-108|phospholipase A1-IIdelta-like [Chenopodium quinoa]
LOC110739635	XM_021920084.1	Known_gene	1	2085571	2086254	NW_018743510.1	+	684	684	XP_021775776.1|4.4e-126|uncharacterized protein LOC110739635 [Chenopodium quinoa]
LOC110739634	XM_021920082.1	Known_gene	1	2027784	2028599	NW_018743510.1	+	816	816	XP_021775774.1|5.3e-158|putative F-box protein At1g32420 [Chenopodium quinoa]
LOC110739633	XM_021920083.1	Known_gene	1	1983245	1986451	NW_018742244.1	-	3207	1302	XP_021775775.1|1.3e-195|uncharacterized protein LOC110739633 [Chenopodium quinoa]
LOC110739631	XM_021920081.1	Known_gene	1	1843735	1844397	NW_018743510.1	-	663	657	XP_021775773.1|6.4e-130|uncharacterized protein LOC110739631 [Chenopodium quinoa]
LOC110739630	XM_021920080.1	Known_gene	1	1824415	1825779	NW_018743510.1	+	1365	1365	XP_021775772.1|7.7e-271|putative nuclease HARBI1 [Chenopodium quinoa]
LOC110739629	XM_021920079.1	Known_gene	1	1816928	1818993	NW_018743510.1	+	2066	1644	XP_021775771.1|0.0e+00|uncharacterized protein LOC110739629 [Chenopodium quinoa]
LOC110739628	XM_021920078.1	Known_gene	1	1816137	1816682	NW_018743510.1	+	546	483	XP_021775770.1|4.0e-89|uncharacterized protein LOC110739628 [Chenopodium quinoa]
LOC110739627	XM_021920076.1	Known_gene	1	1622827	1623777	NW_018743510.1	+	951	951	XP_021775768.1|3.3e-188|uncharacterized protein LOC110739627 [Chenopodium quinoa]
LOC110739626	XM_021920075.1	Known_gene	1	1551557	1554299	NW_018743510.1	-	2743	2601	XP_021775767.1|0.0e+00|uncharacterized protein LOC110739626 [Chenopodium quinoa]
LOC110739625	XM_021920074.1	Known_gene	1	1545204	1547648	NW_018743510.1	-	2445	1710	XP_021775766.1|0.0e+00|uncharacterized protein LOC110739625 [Chenopodium quinoa]
LOC110739624	XM_021920077.1	Known_gene	1	1972666	1978169	NW_018742244.1	-	5504	2211	XP_021775769.1|2.1e-209|NAC domain-containing protein 86-like [Chenopodium quinoa]
LOC110739623	XM_021920073.1	Known_gene	1	1541106	1544311	NW_018743510.1	-	3206	1380	XP_021775765.1|1.3e-270|uncharacterized protein LOC110739623 [Chenopodium quinoa]
LOC110739622	XM_021920072.1	Known_gene	1	1502041	1503394	NW_018743510.1	+	1354	1194	XP_021775764.1|1.0e-239|uncharacterized protein LOC110739622 [Chenopodium quinoa]
LOC110739621	XM_021920071.1	Known_gene	1	1410332	1411041	NW_018743510.1	-	710	710	XP_021775763.1|2.1e-134|uncharacterized protein LOC110739621 [Chenopodium quinoa]
LOC110739620	XM_021920070.1	Known_gene	1	1409477	1409875	NW_018743510.1	-	399	399	XP_021775762.1|4.2e-68|uncharacterized protein LOC110739620 [Chenopodium quinoa]
LOC110739619	XM_021920069.1	Known_gene	1	1364446	1365501	NW_018743510.1	-	1056	963	XP_021775761.1|1.7e-179|DNA damage-inducible protein 1-like [Chenopodium quinoa]
LOC110739618	XM_021920067.1	Known_gene	1	1183636	1185411	NW_018743510.1	+	1776	819	XP_021775759.1|5.8e-157|F-box protein At5g07610-like [Chenopodium quinoa]
LOC110739617	XM_021920068.1	Known_gene	1	1969835	1972668	NW_018742244.1	+	2834	1845	XP_021775760.1|1.6e-300|putative amidase C869.01 [Chenopodium quinoa]
LOC110739616	XM_021920066.1	Known_gene	1	1078088	1078573	NW_018743510.1	+	486	486	XP_021775758.1|1.9e-91|auxin-responsive protein SAUR32-like [Chenopodium quinoa]
LOC110739615	XM_021920065.1	Known_gene	1	995239	996212	NW_018743510.1	-	974	974	XP_021775757.1|7.7e-116|uncharacterized protein LOC110739615, partial [Chenopodium quinoa]
LOC110739614	XM_021920064.1	Known_gene	1	980173	980928	NW_018743510.1	-	756	756	XP_021775756.1|9.9e-143|F-box protein CPR30-like [Chenopodium quinoa]
LOC110739613	XM_021920063.1	Known_gene	1	856888	858311	NW_018743510.1	-	1424	1182	XP_021775755.1|1.6e-224|zinc finger MYM-type protein 1-like [Chenopodium quinoa]
LOC110739611	XM_021920061.1	Known_gene	1	519831	523399	NW_018743510.1	-	3569	2500	XP_021745215.1|0.0e+00|serine/threonine-protein phosphatase 7 long form homolog [Chenopodium quinoa]
LOC110739610	XM_021920060.1	Known_gene	1	370433	371259	NW_018743510.1	-	827	372	XP_021775752.1|3.6e-61|acetyl-CoA acetyltransferase, cytosolic 1-like [Chenopodium quinoa]
LOC110739608	XM_021920062.1	Known_gene	1	1959758	1964603	NW_018742244.1	-	4846	1882	XP_021775754.1|2.2e-183|uncharacterized protein LOC110739608 [Chenopodium quinoa]
LOC110739607	XM_021920059.1	Known_gene	1	158498	159463	NW_018743510.1	-	966	966	XP_021775751.1|1.1e-178|uncharacterized protein LOC110739607 [Chenopodium quinoa]
LOC110739606	XM_021920058.1	Known_gene	1	143112	143429	NW_018743510.1	-	318	318	XP_021775750.1|5.6e-55|flavonoid 3',5'-methyltransferase-like [Chenopodium quinoa]
LOC110739605	XM_021920057.1	Known_gene	1	5275675	5281052	NW_018743510.1	+	5378	626	XP_021775749.1|1.2e-42|uncharacterized protein LOC110739605 [Chenopodium quinoa]
LOC110739603	XM_021920056.1	Known_gene	1	2821401	2824939	NW_018743510.1	+	3539	1133	XP_021775748.1|7.3e-126|deoxycytidylate deaminase-like [Chenopodium quinoa]
LOC110739602	XM_021920055.1	Known_gene	1	2700695	2702571	NW_018743510.1	-	1877	1107	XP_021775747.1|6.5e-103|protein SHOOT GRAVITROPISM 5-like [Chenopodium quinoa]
LOC110739597	XM_021920054.1	Known_gene	1	1945467	1946555	NW_018742244.1	-	1089	1089	XP_021775746.1|5.4e-110|dirigent protein 22-like [Chenopodium quinoa]
LOC110739596	XM_021920053.1	Known_gene	1	2095266	2097588	NW_018743510.1	-	2323	585	XP_021775745.1|2.6e-66|uncharacterized protein LOC110739596 [Chenopodium quinoa]
LOC110739594	XM_021920052.1	Known_gene	1	999134	1002375	NW_018743510.1	-	3242	1444	XP_021775744.1|4.2e-102|TPD1 protein homolog 1-like [Chenopodium quinoa]
LOC110739593	XM_021920051.1	Known_gene	1	546148	548523	NW_018743510.1	-	2376	1743	XP_021775743.1|1.5e-133|NAC domain-containing protein 41-like [Chenopodium quinoa]
LOC110739592	BGI_novel_T005748,XM_021920050.1	Known_gene	2	528231	531246	NW_018743510.1	+	3016	1838	XP_021775742.1|2.0e-157|uncharacterized protein LOC110739592 [Chenopodium quinoa]
LOC110739591	XM_021920049.1	Known_gene	1	329394	331162	NW_018743510.1	-	1769	1198	XP_021775741.1|9.3e-103|CASP-like protein 1F1 [Chenopodium quinoa]
LOC110739590	XM_021920048.1	Known_gene	1	262624	288630	NW_018743509.1	-	26007	1809	XP_021775740.1|4.5e-178|uncharacterized protein LOC110739590 [Chenopodium quinoa]
LOC110739589	XM_021920046.1,XM_021920045.1	Known_gene	2	236523	257792	NW_018743509.1	+	21270	2831	XP_021775737.1|0.0e+00|serine/threonine-protein kinase fray2-like [Chenopodium quinoa]
LOC110739588	XM_021920047.1	Known_gene	1	1931916	1933087	NW_018742244.1	-	1172	1172	XP_021775739.1|4.3e-105|dirigent protein 23-like [Chenopodium quinoa]
LOC110739587	XM_021920044.1	Known_gene	1	30528	31064	NW_018743506.1	+	537	468	XP_021774606.1|7.1e-91|uncharacterized protein LOC110738503 [Chenopodium quinoa]
LOC110739586	XM_021920043.1	Known_gene	1	4029536	4033087	NW_018743389.1	+	3552	1143	XP_021774553.1|1.3e-159|alpha carbonic anhydrase 7-like [Chenopodium quinoa]
LOC110739585	XM_021920042.1	Known_gene	1	8468	9908	NW_018743506.1	-	1441	647	XP_021775734.1|1.0e-79|calcium/calmodulin-regulated receptor-like kinase 1 [Chenopodium quinoa]
LOC110739583	XM_021920040.1,XM_021920041.1	Known_gene	2	13302	17291	NW_018743505.1	+	3990	1194	XP_021775732.1|7.4e-153|transcription initiation factor TFIID subunit 14b-like isoform X1 [Chenopodium quinoa]
LOC110739582	XM_021920038.1,XM_021920039.1,XM_021920037.1	Known_gene	3	5530	10025	NW_018743505.1	-	4496	1593	XP_021730044.1|5.8e-187|uncharacterized protein LOC110697019 [Chenopodium quinoa]
LOC110739580	XM_021920036.1	Known_gene	1	14760	15508	NW_018745481.1	+	749	672	XP_021775728.1|2.0e-86|asparagine--tRNA ligase, chloroplastic/mitochondrial-like [Chenopodium quinoa]
LOC110739578	XM_021920034.1	Known_gene	1	2690603	2691169	NW_018743503.1	+	567	567	XP_021775726.1|6.5e-107|uncharacterized protein LOC110739578 [Chenopodium quinoa]
LOC110739577	XM_021920033.1	Known_gene	1	2687533	2688100	NW_018743503.1	+	568	477	XP_021775725.1|5.3e-86|uncharacterized protein LOC110739577 [Chenopodium quinoa]
LOC110739576	XM_021920032.1	Known_gene	1	2578756	2580304	NW_018743503.1	+	1549	439	XP_021775724.1|4.0e-75|peroxisomal (S)-2-hydroxy-acid oxidase GLO1-like [Chenopodium quinoa]
LOC110739575	XM_021920030.1	Known_gene	1	2523893	2525342	NW_018743503.1	-	1450	663	XP_021775722.1|2.7e-128|uncharacterized protein LOC110739575 [Chenopodium quinoa]
LOC110739574	XM_021920029.1	Known_gene	1	2520495	2521343	NW_018743503.1	+	849	849	XP_021775721.1|1.2e-165|protein MAIN-LIKE 1-like [Chenopodium quinoa]
LOC110739573	XM_021920031.1	Known_gene	1	1922519	1926958	NW_018742244.1	+	4440	4110	XP_021775723.1|0.0e+00|translocase of chloroplast 120, chloroplastic-like [Chenopodium quinoa]
LOC110739572	XM_021920028.1	Known_gene	1	2227172	2228194	NW_018743503.1	+	1023	1023	XP_021775720.1|2.1e-196|uncharacterized protein LOC110739572 [Chenopodium quinoa]
LOC110739571	XM_021920027.1	Known_gene	1	2100984	2101427	NW_018743503.1	+	444	444	XP_021775719.1|1.6e-76|protein FAR-RED IMPAIRED RESPONSE 1-like [Chenopodium quinoa]
LOC110739570	XM_021920026.1	Known_gene	1	2025698	2026354	NW_018743503.1	+	657	657	XP_021775718.1|1.7e-119|zinc finger MYM-type protein 1-like [Chenopodium quinoa]
LOC110739569	XM_021920025.1	Known_gene	1	1987906	1989224	NW_018743503.1	+	1319	1242	XP_021775717.1|1.2e-251|uncharacterized protein LOC110739569 [Chenopodium quinoa]
LOC110739568	XM_021920024.1	Known_gene	1	1967241	1968799	NW_018743503.1	-	1559	1212	XP_021775716.1|8.4e-237|uncharacterized protein LOC110739568 [Chenopodium quinoa]
LOC110739567	XM_021920023.1	Known_gene	1	1811143	1811595	NW_018743503.1	-	453	453	XP_021775715.1|2.1e-79|uncharacterized protein LOC110739567 [Chenopodium quinoa]
LOC110739566	XM_021920021.1	Known_gene	1	1768007	1809278	NW_018743503.1	+	41272	1810	XP_021775713.1|0.0e+00|protein trichome birefringence-like 42 [Chenopodium quinoa]
LOC110739565	XM_021920020.1	Known_gene	1	1585165	1589754	NW_018743503.1	+	4590	3279	XP_021775712.1|0.0e+00|uncharacterized protein LOC110739565 [Chenopodium quinoa]
LOC110739564	XM_021920022.1	Known_gene	1	1909424	1911609	NW_018742244.1	-	2186	2186	XP_021775714.1|0.0e+00|pentatricopeptide repeat-containing protein At2g21090-like [Chenopodium quinoa]
LOC110739563	XM_021920019.1	Known_gene	1	1385431	1386870	NW_018743503.1	+	1440	1440	XP_021775711.1|8.4e-284|uncharacterized protein LOC110739563 [Chenopodium quinoa]
LOC110739562	XM_021920018.1	Known_gene	1	1130076	1149005	NW_018743503.1	+	18930	2076	XP_021775710.1|0.0e+00|uncharacterized protein LOC110739562 [Chenopodium quinoa]
LOC110739561	XM_021920017.1	Known_gene	1	1024545	1025710	NW_018743503.1	+	1166	924	XP_021775709.1|2.9e-173|uncharacterized protein LOC110739561 [Chenopodium quinoa]
LOC110739559	XM_021920016.1	Known_gene	1	973952	975631	NW_018743503.1	-	1680	1278	XP_021775708.1|1.8e-253|uncharacterized protein LOC110739559 [Chenopodium quinoa]
LOC110739558	XM_021920015.1	Known_gene	1	599115	599612	NW_018743503.1	+	498	498	XP_021775707.1|2.4e-97|N66 matrix protein-like [Chenopodium quinoa]
LOC110739557	XM_021920014.1	Known_gene	1	514417	515124	NW_018743503.1	-	708	708	XP_021775706.1|5.3e-130|uncharacterized protein LOC110739557 [Chenopodium quinoa]
LOC110739555	XM_021920013.1,BGI_novel_T005710	Known_gene	2	454527	457071	NW_018743503.1	+	2545	1161	XP_021775705.1|3.2e-233|leucine-rich repeat extensin-like protein 2 [Chenopodium quinoa]
LOC110739554	XM_021920012.1	Known_gene	1	454527	455558	NW_018743503.1	+	1032	1032	XP_021775704.1|5.7e-210|leucine-rich repeat extensin-like protein 1 [Chenopodium quinoa]
LOC110739553	XM_021920035.1	Known_gene	1	17978577	17979967	NW_018742204.1	-	1391	1050	XP_021775727.1|4.3e-197|uncharacterized protein LOC110739553 [Chenopodium quinoa]
LOC110739552	XM_021920011.1	Known_gene	1	249875	252352	NW_018743503.1	+	2478	2100	XP_021775703.1|0.0e+00|uncharacterized protein LOC110739552 [Chenopodium quinoa]
LOC110739551	XM_021920010.1	Known_gene	1	226659	227532	NW_018743503.1	-	874	708	XP_021775702.1|3.2e-135|uncharacterized protein LOC110739551 [Chenopodium quinoa]
LOC110739550	XM_021920009.1	Known_gene	1	147263	149237	NW_018743503.1	+	1975	1308	XP_021745243.1|8.3e-190|LOW QUALITY PROTEIN: uncharacterized protein LOC110711169 [Chenopodium quinoa]
LOC110739548	XM_021920008.1	Known_gene	1	113450	115636	NW_018743503.1	-	2187	2121	XP_021775700.1|0.0e+00|uncharacterized protein LOC110739548 [Chenopodium quinoa]
LOC110739547	XM_021920007.1	Known_gene	1	80761	85122	NW_018743503.1	+	4362	2670	XP_021775699.1|0.0e+00|uncharacterized protein LOC110739547 [Chenopodium quinoa]
LOC110739546	XM_021920006.1	Known_gene	1	3560183	3564042	NW_018743503.1	-	3860	1344	XP_021775698.1|5.4e-144|14-3-3-like protein D [Chenopodium quinoa]
LOC110739545	XM_021920005.1	Known_gene	1	3546579	3557962	NW_018743503.1	-	11384	1136	XP_021775697.1|2.0e-123|bifunctional riboflavin kinase/FMN phosphatase-like [Chenopodium quinoa]
LOC110739544	XM_021920004.1	Known_gene	1	3540235	3542023	NW_018743503.1	-	1789	872	XP_021775696.1|1.6e-117|protein FAR1-RELATED SEQUENCE 5-like [Chenopodium quinoa]
LOC110739543	XM_021920003.1	Known_gene	1	3537517	3540138	NW_018743503.1	-	2622	1763	XP_021719683.1|0.0e+00|protein FAR1-RELATED SEQUENCE 5-like [Chenopodium quinoa]
LOC110739542	XM_021920001.1,XM_021920002.1	Known_gene	2	3533803	3536185	NW_018743503.1	+	2383	1211	XP_021739086.1|5.6e-156|uncharacterized protein LOC110705506 [Chenopodium quinoa]
LOC110739540	XM_021919998.1,XM_021919999.1	Known_gene	2	3351096	3355909	NW_018743503.1	-	4814	775	XP_021775691.1|1.2e-73|ubiquitin-conjugating enzyme E2 36-like isoform X2 [Chenopodium quinoa]
LOC110739539	XM_021919997.1	Known_gene	1	3337165	3341724	NW_018743503.1	+	4560	2246	Q01292.1|0.0e+00|RecName: Full=Ketol-acid reductoisomerase, chloroplastic; AltName: Full=Acetohydroxy-acid reductoisomerase; AltName: Full=Alpha-keto-beta-hydroxylacyl reductoisomerase; Flags: Precursor [Spinacia oleracea]
LOC110739538	XM_021919996.1	Known_gene	1	3238684	3249913	NW_018743503.1	-	11230	859	XP_021775688.1|1.1e-81|uncharacterized protein LOC110739538 [Chenopodium quinoa]
LOC110739537	XM_021919995.1,XM_021919990.1,BGI_novel_T005733,XM_021919991.1,XM_021919992.1,BGI_novel_T005732,XM_021919993.1	Known_gene	7	3221455	3224961	NW_018743503.1	+	3507	2913	XP_021775683.1|0.0e+00|G-type lectin S-receptor-like serine/threonine-protein kinase At1g11330 isoform X2 [Chenopodium quinoa]
LOC110739536	XM_021919988.1,XM_021919989.1	Known_gene	2	3103966	3108980	NW_018743503.1	-	5015	2980	XP_021775680.1|1.1e-127|uncharacterized protein LOC110739536 [Chenopodium quinoa]
LOC110739534	BGI_novel_T005729,BGI_novel_T005728,XM_021919982.1,XM_021919983.1,XM_021919986.1,XM_021919987.1,BGI_novel_T005730,XM_021919984.1	Known_gene	8	3025489	3040610	NW_018743503.1	-	15122	4668	XP_021775674.1|6.0e-216|uncharacterized protein LOC110739534 isoform X1 [Chenopodium quinoa]
LOC110739533	XM_021919981.1	Known_gene	1	2727908	2734684	NW_018743503.1	-	6777	1334	XP_021775673.1|5.5e-165|uncharacterized protein At1g03900-like [Chenopodium quinoa]
LOC110739532	XM_021919980.1	Known_gene	1	2832670	2837467	NW_018743503.1	-	4798	1520	XP_021775672.1|1.1e-209|uncharacterized protein LOC110739532 [Chenopodium quinoa]
LOC110739530	XM_021919979.1	Known_gene	1	2556237	2565887	NW_018743503.1	-	9651	2310	XP_021775671.1|1.4e-243|uncharacterized protein LOC110739530 [Chenopodium quinoa]
LOC110739529	XM_021919978.1	Known_gene	1	2552124	2556122	NW_018743503.1	+	3999	1684	XP_021775670.1|4.8e-283|protein trichome birefringence-like 43 [Chenopodium quinoa]
LOC110739528	XM_021919976.1	Known_gene	1	2508095	2517909	NW_018743503.1	+	9815	2117	XP_021775668.1|0.0e+00|protein trichome birefringence-like 3 [Chenopodium quinoa]
LOC110739526	XM_021919994.1,BGI_novel_T000567,XM_021919977.1,XM_021919985.1,XM_021920000.1,BGI_novel_T000566,BGI_novel_T000565	Known_gene	7	1890713	1905563	NW_018742244.1	+	14851	6013	XP_021775669.1|0.0e+00|methyltransferase-like protein 16 [Chenopodium quinoa]
LOC110739525	XM_021919974.1,XM_021919975.1,XM_021919972.1,XM_021919973.1	Known_gene	4	2240156	2243239	NW_018743503.1	+	3084	2008	XP_021735196.1|8.1e-144|protein FAR-RED IMPAIRED RESPONSE 1-like [Chenopodium quinoa]
LOC110739524	XM_021919971.1	Known_gene	1	2205484	2225562	NW_018743503.1	-	20079	2027	XP_021775663.1|6.2e-285|protein trichome birefringence-like 40 [Chenopodium quinoa]
LOC110739522	BGI_novel_T005720,BGI_novel_T005721,BGI_novel_T005722,BGI_novel_T005723,XM_021919970.1,BGI_novel_T005724	Known_gene	6	2031644	2034662	NW_018743503.1	-	3019	1208	XP_021775662.1|2.2e-43|probable beta-1,3-galactosyltransferase 8 [Chenopodium quinoa]
LOC110739521	XM_021919969.1,XM_021919967.1	Known_gene	2	1948780	1954486	NW_018743503.1	+	5707	1850	XP_021730330.1|2.7e-149|uncharacterized protein LOC110697275 [Chenopodium quinoa]
LOC110739520	XM_021919966.1	Known_gene	1	1942688	1946002	NW_018743503.1	+	3315	1700	XP_021775658.1|1.5e-247|protein trichome birefringence-like 43 [Chenopodium quinoa]
LOC110739519	XM_021919965.1	Known_gene	1	1684431	1697493	NW_018743503.1	+	13063	1884	XP_021775657.1|5.9e-253|protein trichome birefringence-like 42 [Chenopodium quinoa]
LOC110739518	XM_021919964.1	Known_gene	1	1593434	1596271	NW_018743503.1	+	2838	1702	XP_021775656.1|1.3e-272|protein PMR5-like [Chenopodium quinoa]
LOC110739517	XM_021919963.1	Known_gene	1	1377492	1379919	NW_018743503.1	+	2428	2085	XP_021775655.1|1.9e-265|protein trichome birefringence-like 43 [Chenopodium quinoa]
LOC110739515	XM_021919962.1	Known_gene	1	1351866	1368356	NW_018743503.1	+	16491	2079	XP_021775654.1|4.6e-259|F-box protein At5g49610-like [Chenopodium quinoa]
LOC110739514	XM_021919960.1	Known_gene	1	1312279	1319793	NW_018743503.1	-	7515	1696	XP_021775652.1|4.1e-56|uncharacterized protein LOC110739514 [Chenopodium quinoa]
LOC110739511	XM_021919959.1	Known_gene	1	945145	949114	NW_018743503.1	+	3970	1974	XP_021775651.1|3.5e-208|trans-resveratrol di-O-methyltransferase-like [Chenopodium quinoa]
LOC110739510	XM_021919958.1	Known_gene	1	938304	942126	NW_018743503.1	+	3823	1381	XP_021775650.1|1.1e-208|trans-resveratrol di-O-methyltransferase-like [Chenopodium quinoa]
LOC110739507	XM_021919955.1,XM_021919956.1	Known_gene	2	637976	672766	NW_018743503.1	+	34791	2568	XP_021775647.1|0.0e+00|transmembrane E3 ubiquitin-protein ligase 1-like isoform X1 [Chenopodium quinoa]
LOC110739506	XM_021919954.1	Known_gene	1	423693	424675	NW_018743503.1	+	983	778	XP_021775646.1|1.3e-52|uncharacterized protein LOC110739506 [Chenopodium quinoa]
LOC110739505	XM_021919953.1	Known_gene	1	388844	394099	NW_018743503.1	-	5256	1621	XP_021775645.1|4.3e-220|ADP,ATP carrier protein-like [Chenopodium quinoa]
LOC110739504	XM_021919952.1	Known_gene	1	385805	387170	NW_018743503.1	-	1366	1366	XP_010689048.1|5.3e-195|PREDICTED: leucine-rich repeat extensin-like protein 4 [Beta vulgaris subsp. vulgaris]
LOC110739503	XM_021919950.1	Known_gene	1	262519	264385	NW_018743503.1	-	1867	1248	XP_021753552.1|5.1e-189|uncharacterized protein LOC110718917 isoform X2 [Chenopodium quinoa]
LOC110739502	XM_021919949.1	Known_gene	1	260752	262481	NW_018743503.1	+	1730	1639	XP_021745372.1|6.2e-118|protein FAR1-RELATED SEQUENCE 9-like [Chenopodium quinoa]
LOC110739501	XM_021919947.1,XM_021919946.1,XM_021919945.1,XM_021919948.1	Known_gene	4	229800	236641	NW_018743503.1	+	6842	2502	XP_021775637.1|3.8e-292|heterogeneous nuclear ribonucleoprotein Q-like isoform X1 [Chenopodium quinoa]
LOC110739500	XM_021919944.1	Known_gene	1	180807	182227	NW_018743503.1	+	1421	1294	XP_021717473.1|1.4e-109|uncharacterized protein LOC110685290 isoform X1 [Chenopodium quinoa]
LOC110739499	XM_021919942.1	Known_gene	1	93612	100746	NW_018743503.1	-	7135	4215	XP_021775634.1|0.0e+00|mitotic checkpoint serine/threonine-protein kinase BUB1-like [Chenopodium quinoa]
LOC110739498	XM_021919941.1	Known_gene	1	47050	52223	NW_018743503.1	-	5174	3024	XP_021775633.1|0.0e+00|protein TPX2-like [Chenopodium quinoa]
LOC110739497	XM_021919961.1,XM_021919943.1,XM_021919957.1,XM_021919968.1,XM_021919951.1	Known_gene	5	1870802	1885771	NW_018742244.1	-	14970	1366	XP_021775635.1|2.1e-118|MADS-box protein AGL24-like [Chenopodium quinoa]
LOC110739496	XM_021919940.1	Known_gene	1	34870	40581	NW_018743503.1	-	5712	1276	XP_010689059.1|2.0e-143|PREDICTED: probable protein phosphatase 2C 39 [Beta vulgaris subsp. vulgaris]
LOC110739495	BGI_novel_T005734,XM_021919939.1,BGI_novel_T005735	Known_gene	3	3693699	3698403	NW_018743503.1	-	4705	1340	XP_021775631.1|1.8e-92|protein KAKU4-like [Chenopodium quinoa]
LOC110739494	XM_021919938.1	Known_gene	1	3669763	3670155	NW_018743503.1	+	393	393	XP_021775630.1|3.7e-69|uncharacterized protein LOC110739494 [Chenopodium quinoa]
LOC110739493	XM_021919937.1	Known_gene	1	3660661	3661310	NW_018743503.1	+	650	561	XP_021775629.1|6.7e-104|uncharacterized protein LOC110739493 [Chenopodium quinoa]
LOC110739492	XM_021919936.1	Known_gene	1	3637344	3640017	NW_018743503.1	-	2674	1293	XP_021775628.1|1.1e-261|protein FAR1-RELATED SEQUENCE 5-like [Chenopodium quinoa]
LOC110739491	XM_021919934.1	Known_gene	1	3597788	3599872	NW_018743503.1	-	2085	2085	XP_021775626.1|0.0e+00|uncharacterized protein LOC110739491 [Chenopodium quinoa]
LOC110739490	XM_021919933.1	Known_gene	1	3574927	3576499	NW_018743503.1	+	1573	1471	XP_021775625.1|1.6e-293|uncharacterized protein LOC110739490 [Chenopodium quinoa]
LOC110739489	XM_021919932.1	Known_gene	1	3529417	3530631	NW_018743503.1	+	1215	537	XP_021775624.1|5.8e-97|uncharacterized protein LOC110739489 [Chenopodium quinoa]
LOC110739488	XM_021919935.1	Known_gene	1	1865987	1866983	NW_018742244.1	-	997	834	XP_021739073.1|2.0e-152|protein MAINTENANCE OF MERISTEMS-like [Chenopodium quinoa]
LOC110739487	XM_021919931.1	Known_gene	1	3506776	3508518	NW_018743503.1	+	1743	1743	XP_021775623.1|0.0e+00|uncharacterized protein LOC110739487 [Chenopodium quinoa]
LOC110739486	XM_021919930.1	Known_gene	1	3480773	3481264	NW_018743503.1	-	492	492	XP_021775622.1|1.4e-92|uncharacterized protein LOC110739486 [Chenopodium quinoa]
LOC110739484	XM_021919929.1	Known_gene	1	3256488	3257231	NW_018743503.1	-	744	744	XP_021775621.1|4.8e-142|uncharacterized protein LOC110739484 [Chenopodium quinoa]
LOC110739483	XM_021919928.1	Known_gene	1	3157963	3159399	NW_018743503.1	+	1437	1437	XP_021775620.1|1.3e-273|probable leucine-rich repeat receptor-like protein kinase At1g35710 [Chenopodium quinoa]
LOC110739482	XM_021919926.1	Known_gene	1	3082119	3083216	NW_018743503.1	-	1098	1098	XP_021775618.1|1.1e-211|glutathione S-transferase T3-like [Chenopodium quinoa]
LOC110739481	XM_021919925.1	Known_gene	1	3080205	3081569	NW_018743503.1	-	1365	1365	XP_021775617.1|2.6e-271|putative nuclease HARBI1 [Chenopodium quinoa]
LOC110739480	XM_021919927.1	Known_gene	1	1864715	1865903	NW_018742244.1	+	1189	1101	XP_021714686.1|4.2e-203|PKS-NRPS hybrid synthetase CHGG_01239-like [Chenopodium quinoa]
LOC110739479	XM_021919924.1	Known_gene	1	2929392	2932484	NW_018743503.1	-	3093	1674	XP_021775616.1|0.0e+00|uncharacterized protein LOC110739479 [Chenopodium quinoa]
LOC110739478	XM_021919923.1	Known_gene	1	2877663	2879655	NW_018743503.1	-	1993	1512	XP_021775615.1|1.4e-302|uncharacterized protein LOC110739478 [Chenopodium quinoa]
LOC110739476	XM_021919922.1	Known_gene	1	3805451	3807607	NW_018743503.1	+	2157	1723	XP_021775614.1|1.0e-86|heavy metal-associated isoprenylated plant protein 28-like [Chenopodium quinoa]
LOC110739474	XM_021919921.1	Known_gene	1	3343778	3347201	NW_018743503.1	+	3424	2579	XP_021775613.1|4.5e-139|uncharacterized protein LOC110739474 [Chenopodium quinoa]
LOC110739473	XM_021920216.1	Known_gene	1	3482786	3483655	NW_018742204.1	+	870	870	XP_021775908.1|3.4e-163|uncharacterized protein LOC110739473 [Chenopodium quinoa]
LOC110739472	XM_021919920.1,BGI_novel_T005726,XM_021919917.1,XM_021919918.1	Known_gene	4	2390048	2398769	NW_018743503.1	-	8722	3923	XP_021775609.1|1.7e-156|uncharacterized protein LOC110739472 [Chenopodium quinoa]
LOC110739471	XM_021919916.1	Known_gene	1	2337420	2339899	NW_018743503.1	+	2480	1591	XP_021775608.1|1.2e-187|uncharacterized protein LOC110739471 [Chenopodium quinoa]
LOC110739470	XM_021919919.1	Known_gene	1	1852920	1854008	NW_018742244.1	-	1089	1089	CAD22154.1|2.0e-40|pherophorin-dz1 protein [Volvox carteri f. nagariensis]
LOC110739469	XM_021919915.1	Known_gene	1	2017409	2021618	NW_018743503.1	-	4210	1434	XP_021775607.1|6.9e-262|protein trichome birefringence-like [Chenopodium quinoa]
LOC110739468	XM_021919914.1	Known_gene	1	1428340	1431506	NW_018743503.1	+	3167	1431	XP_021775606.1|9.6e-248|protein trichome birefringence-like 40 [Chenopodium quinoa]
LOC110739467	XM_021919913.1	Known_gene	1	1321909	1325436	NW_018743503.1	-	3528	1265	XP_021775605.1|1.1e-61|uncharacterized protein LOC110739467 [Chenopodium quinoa]
LOC110739466	XM_021919912.1,BGI_novel_T005717	Known_gene	2	1173870	1185932	NW_018743503.1	-	12063	2327	XP_021775604.1|1.4e-258|protein trichome birefringence-like 40 [Chenopodium quinoa]
LOC110739461	XM_021919910.1	Known_gene	1	21102	23799	NW_018743501.1	-	2698	1160	XP_021771393.1|2.1e-115|NAD-dependent protein deacetylase SRT1-like [Chenopodium quinoa]
LOC110739460	XM_021919909.1	Known_gene	1	3698	6434	NW_018743501.1	-	2737	2231	XP_021775601.1|0.0e+00|uncharacterized protein LOC110739460 [Chenopodium quinoa]
LOC110739459	XM_021919911.1	Known_gene	1	1834264	1839156	NW_018742244.1	+	4893	2091	XP_021753097.1|4.4e-294|auxin transporter-like protein 2 [Chenopodium quinoa]
LOC110739458	XM_021919908.1	Known_gene	1	785	1158	NW_018743501.1	-	374	299	XP_021771394.1|1.8e-47|uncharacterized protein LOC110735513 [Chenopodium quinoa]
LOC110739453	XM_021919907.1	Known_gene	1	4614520	4615126	NW_018743691.1	+	607	528	XP_021775599.1|5.0e-101|uncharacterized protein LOC110739453 [Chenopodium quinoa]
LOC110739451	XM_021919905.1	Known_gene	1	15183	16911	NW_018743498.1	-	1729	672	XP_021775597.1|3.6e-104|uncharacterized protein LOC110739451 [Chenopodium quinoa]
LOC110739449	XM_021919904.1	Known_gene	1	31659	35117	NW_018743619.1	+	3459	1563	XP_021715183.1|9.7e-177|peroxidase 4-like [Chenopodium quinoa]
LOC110739448	XM_021919906.1	Known_gene	1	1810969	1815506	NW_018742244.1	-	4538	1522	XP_021775598.1|2.2e-173|thaumatin-like protein 1b [Chenopodium quinoa]
LOC110739447	XM_021919903.1	Known_gene	1	16486	17025	NW_018743487.1	+	540	540	XP_021775595.1|1.8e-101|trypsin inhibitor 2-like [Chenopodium quinoa]
LOC110739445	XM_021919902.1	Known_gene	1	81432	89415	NW_018743487.1	+	7984	2247	XP_010691966.1|1.2e-289|PREDICTED: protein ECERIFERUM 1 [Beta vulgaris subsp. vulgaris]
LOC110739444	XM_021919899.1,XM_021919900.1,XM_021919901.1,XM_021919898.1	Known_gene	4	58561	79573	NW_018743487.1	-	21013	1940	XP_021775590.1|1.2e-268|fatty acyl-CoA reductase 3-like isoform X1 [Chenopodium quinoa]
LOC110739441	XM_021919896.1	Known_gene	1	70436	71329	NW_018743487.1	-	894	894	XP_021775588.1|4.4e-174|uncharacterized protein K02A2.6-like [Chenopodium quinoa]
LOC110739440	XM_021919897.1	Known_gene	1	1803268	1805926	NW_018742244.1	-	2659	1572	XP_021775589.1|3.9e-218|thaumatin-like protein 1 [Chenopodium quinoa]
LOC110739437	XM_021919895.1	Known_gene	1	13075	13674	NW_018743486.1	-	600	600	XP_021726609.1|3.3e-101|agamous-like MADS-box protein AGL17 [Chenopodium quinoa]
LOC110739434	BGI_novel_T005691,XM_021919893.1	Known_gene	2	2793670	2815322	NW_018743476.1	+	21653	2637	XP_021775585.1|0.0e+00|uncharacterized protein LOC110739434 [Chenopodium quinoa]
LOC110739433	XM_021919892.1	Known_gene	1	2772204	2774880	NW_018743476.1	+	2677	1543	XP_021775584.1|9.4e-217|replication protein A 70 kDa DNA-binding subunit B-like [Chenopodium quinoa]
LOC110739432	XM_021919891.1	Known_gene	1	2766938	2769382	NW_018743476.1	+	2445	2379	XP_021775583.1|0.0e+00|uncharacterized protein LOC110739432 [Chenopodium quinoa]
LOC110739431	XM_021919894.1	Known_gene	1	1784999	1785957	NW_018742244.1	-	959	959	XP_021775586.1|4.2e-130|photosystem I reaction center subunit III, chloroplastic [Chenopodium quinoa]
LOC110739430	XM_021919890.1	Known_gene	1	2601724	2602119	NW_018743476.1	+	396	396	XP_021775582.1|2.1e-67|uncharacterized protein LOC110739430 [Chenopodium quinoa]
LOC110739429	XM_021919889.1	Known_gene	1	2360652	2361612	NW_018743476.1	-	961	852	XP_021775581.1|7.2e-158|uncharacterized protein LOC110739429 [Chenopodium quinoa]
LOC110739428	XM_021919888.1	Known_gene	1	2351114	2352074	NW_018743476.1	-	961	852	XP_021775580.1|5.5e-158|uncharacterized protein LOC110739428 [Chenopodium quinoa]
LOC110739427	XM_021919886.1	Known_gene	1	2332272	2334235	NW_018743476.1	+	1964	621	XP_021775578.1|1.8e-113|uncharacterized protein LOC110739427 [Chenopodium quinoa]
LOC110739426	XM_021919885.1	Known_gene	1	2294166	2297283	NW_018743476.1	+	3118	2088	XP_021732314.1|7.7e-137|uncharacterized protein LOC110699131 [Chenopodium quinoa]
LOC110739425	XM_021919887.1	Known_gene	1	1779026	1781091	NW_018742244.1	+	2066	1595	XP_021775579.1|9.6e-273|uncharacterized protein LOC110739425 [Chenopodium quinoa]
LOC110739424	XM_021919884.1	Known_gene	1	2244043	2244438	NW_018743476.1	+	396	396	XP_021775576.1|2.6e-70|uncharacterized protein LOC110739424 [Chenopodium quinoa]
LOC110739423	XM_021919883.1	Known_gene	1	1781127	1782668	NW_018743476.1	-	1542	1464	XP_021775575.1|2.0e-285|uncharacterized protein LOC110739423 [Chenopodium quinoa]
LOC110739422	XM_021919882.1	Known_gene	1	1705098	1706327	NW_018743476.1	+	1230	1230	XP_021775574.1|1.6e-243|protein FAR1-RELATED SEQUENCE 5-like [Chenopodium quinoa]
LOC110739421	XM_021919881.1	Known_gene	1	1591104	1592420	NW_018743476.1	-	1317	1317	XP_021775573.1|6.7e-264|uncharacterized protein LOC110739421 [Chenopodium quinoa]
LOC110739420	XM_021919880.1	Known_gene	1	1760138	1764462	NW_018742244.1	+	4325	2528	XP_021775572.1|0.0e+00|protein NUCLEAR FUSION DEFECTIVE 4-like [Chenopodium quinoa]
LOC110739419	XM_021919879.1	Known_gene	1	1434585	1438056	NW_018743476.1	-	3472	1173	XP_021775571.1|2.0e-238|protein FAR1-RELATED SEQUENCE 9-like [Chenopodium quinoa]
LOC110739418	XM_021919878.1	Known_gene	1	1416455	1417279	NW_018743476.1	+	825	825	XP_021775570.1|1.7e-159|uncharacterized protein K02A2.6-like [Chenopodium quinoa]
LOC110739417	XM_021919877.1	Known_gene	1	1375428	1376216	NW_018743476.1	-	789	789	XP_021775569.1|3.2e-144|uncharacterized protein LOC110739417 [Chenopodium quinoa]
LOC110739416	XM_021919875.1	Known_gene	1	787226	788479	NW_018743476.1	+	1254	1080	XP_021775567.1|6.2e-207|uncharacterized protein LOC110739416 [Chenopodium quinoa]
LOC110739415	XM_021919873.1	Known_gene	1	679905	681651	NW_018743476.1	-	1747	1113	XP_021775565.1|4.4e-216|protein FAR1-RELATED SEQUENCE 5-like [Chenopodium quinoa]
LOC110739414	XM_021919872.1	Known_gene	1	471524	475153	NW_018743476.1	-	3630	1668	XP_021775564.1|0.0e+00|protein FAR1-RELATED SEQUENCE 1-like [Chenopodium quinoa]
LOC110739413	XM_021919871.1	Known_gene	1	457156	459080	NW_018743476.1	-	1925	1710	XP_021775563.1|0.0e+00|uncharacterized protein LOC110739413 [Chenopodium quinoa]
LOC110739412	XM_021919874.1	Known_gene	1	1741485	1746379	NW_018742244.1	-	4895	1396	XP_021775566.1|5.7e-128|peptidyl-prolyl cis-trans isomerase CYP21-1-like [Chenopodium quinoa]
LOC110739411	XM_021919870.1	Known_gene	1	436606	440691	NW_018743476.1	+	4086	3459	XP_021775562.1|0.0e+00|uncharacterized protein LOC110739411 [Chenopodium quinoa]
LOC110739410	XM_021919869.1	Known_gene	1	121420	122304	NW_018743476.1	+	885	885	XP_021775561.1|9.1e-172|uncharacterized protein LOC110739410 [Chenopodium quinoa]
LOC110739408	XM_021919868.1	Known_gene	1	3276685	3277312	NW_018743476.1	-	628	628	XP_021775560.1|1.7e-60|uncharacterized protein LOC110739408 [Chenopodium quinoa]
LOC110739405	BGI_novel_T000564,XM_021919867.1	Known_gene	2	1728226	1733657	NW_018742244.1	-	5432	5318	XP_021775559.1|1.1e-101|protein FLOWERING LOCUS T-like [Chenopodium quinoa]
LOC110739404	XM_021919866.1	Known_gene	1	2995570	3010173	NW_018743476.1	+	14604	2346	XP_021775558.1|8.1e-212|transcription factor JUNGBRUNNEN 1-like [Chenopodium quinoa]
LOC110739403	XM_021919865.1	Known_gene	1	3010244	3015280	NW_018743476.1	-	5037	3071	XP_021775557.1|0.0e+00|elongation factor 2 [Chenopodium quinoa]
LOC110739401	XM_021919864.1	Known_gene	1	2775459	2785875	NW_018743476.1	-	10417	1430	XP_021775556.1|4.0e-145|dihydroceramide fatty acyl 2-hydroxylase FAH1-like [Chenopodium quinoa]
LOC110739399	XM_021919861.1,XM_021919863.1,XM_021919862.1,XM_021919859.1	Known_gene	4	2494069	2501806	NW_018743476.1	-	7738	2578	XP_021775551.1|7.1e-57|TBC1 domain family member 15-like isoform X1 [Chenopodium quinoa]
LOC110739398	XM_021919858.1	Known_gene	1	2434925	2463072	NW_018743476.1	+	28148	1638	XP_021775550.1|9.6e-236|uncharacterized protein LOC110739398 [Chenopodium quinoa]
LOC110739397	BGI_novel_T000563,XM_021919860.1	Known_gene	2	1721019	1725072	NW_018742244.1	-	4054	1044	XP_021775552.1|3.5e-117|protein HEADING DATE 3A-like [Chenopodium quinoa]
LOC110739396	XM_021919856.1,XM_021919857.1	Known_gene	2	1735360	1778792	NW_018743476.1	-	43433	2029	XP_021775549.1|3.7e-262|zinc finger CCCH domain-containing protein 37-like isoform X2 [Chenopodium quinoa]
LOC110739394	XM_021919855.1	Known_gene	1	1586799	1588221	NW_018743476.1	-	1423	1423	XP_021775547.1|5.1e-201|protein SLOW GREEN 1, chloroplastic-like [Chenopodium quinoa]
LOC110739393	XM_021919854.1,BGI_novel_T005686,BGI_novel_T005688	Known_gene	3	1564649	1570906	NW_018743476.1	+	6258	1787	XP_021775546.1|2.0e-108|uncharacterized protein LOC110739393 [Chenopodium quinoa]
LOC110739392	XM_021919876.1	Known_gene	1	17869917	17870836	NW_018742204.1	-	920	630	XP_021775568.1|9.8e-120|F-box/FBD/LRR-repeat protein At1g13570-like [Chenopodium quinoa]
LOC110739390	XM_021919851.1,XM_021919852.1	Known_gene	2	1182609	1196536	NW_018743476.1	+	13928	1275	XP_021775543.1|7.4e-145|DCN1-like protein 1 [Chenopodium quinoa]
LOC110739389	XM_021919853.1	Known_gene	1	1711986	1720745	NW_018742244.1	-	8760	2523	XP_021775545.1|0.0e+00|CTL-like protein DDB_G0274487 [Chenopodium quinoa]
LOC110739386	XM_021919846.1,BGI_novel_T005679,XM_021919850.1,BGI_novel_T005678,XM_021919849.1,XM_021919845.1,XM_021919848.1,XM_021919847.1	Known_gene	8	685904	705005	NW_018743476.1	-	19102	5601	XP_021775539.1|0.0e+00|putative cyclin-B3-1 isoform X2 [Chenopodium quinoa]
LOC110739385	XM_021919843.1,XM_021919842.1	Known_gene	2	629119	657293	NW_018743476.1	-	28175	1063	XP_021775535.1|3.5e-156|peroxisomal 2,4-dienoyl-CoA reductase-like isoform X2 [Chenopodium quinoa]
LOC110739383	XM_021919844.1	Known_gene	1	1706443	1708208	NW_018742244.1	-	1766	931	XP_021775536.1|4.0e-77|actin-depolymerizing factor 5-like [Chenopodium quinoa]
LOC110739382	BGI_novel_T005676,XM_021919838.1,XM_021919840.1,XM_021919841.1,XM_021919839.1	Known_gene	5	594567	601418	NW_018743476.1	+	6852	1951	XP_021775530.1|1.3e-143|uncharacterized protein LOC110739382 isoform X1 [Chenopodium quinoa]
LOC110739381	XM_021919837.1	Known_gene	1	524053	539854	NW_018743476.1	-	15802	3498	XP_021729927.1|3.9e-186|protein FAR-RED IMPAIRED RESPONSE 1-like [Chenopodium quinoa]
LOC110739380	XM_021919836.1,XM_021919835.1	Known_gene	2	476393	486341	NW_018743476.1	-	9949	1452	XP_021775527.1|2.4e-185|uncharacterized protein At4g15545-like isoform X1 [Chenopodium quinoa]
LOC110739378	XM_021919833.1	Known_gene	1	149371	172304	NW_018743476.1	-	22934	2505	XP_021775525.1|0.0e+00|peptidyl-prolyl cis-trans isomerase CYP59-like [Chenopodium quinoa]
LOC110739377	XM_021919832.1	Known_gene	1	123301	135896	NW_018743476.1	+	12596	2040	XP_021757340.1|0.0e+00|proline--tRNA ligase, chloroplastic/mitochondrial-like [Chenopodium quinoa]
LOC110739376	XM_021919834.1	Known_gene	1	1647826	1657218	NW_018742244.1	-	9393	3172	XP_021775526.1|0.0e+00|LOW QUALITY PROTEIN: acylamino-acid-releasing enzyme-like [Chenopodium quinoa]
LOC110739375	XM_021919830.1,BGI_novel_T005675,XM_021919831.1,BGI_novel_T005674	Known_gene	4	29886	37200	NW_018743476.1	+	7315	3495	XP_021759089.1|9.5e-142|uncharacterized protein LOC110723984 [Chenopodium quinoa]
LOC110739374	XM_021919829.1	Known_gene	1	15515	27235	NW_018743476.1	+	11721	1254	XP_021775521.1|7.6e-249|uncharacterized protein LOC110739374 [Chenopodium quinoa]
LOC110739373	XM_021919828.1	Known_gene	1	3401980	3402300	NW_018743476.1	-	321	321	XP_021775520.1|8.1e-54|uncharacterized protein LOC110739373 [Chenopodium quinoa]
LOC110739372	XM_021919827.1	Known_gene	1	3310486	3311339	NW_018743476.1	-	854	777	XP_021775519.1|2.5e-149|uncharacterized protein LOC110739372 [Chenopodium quinoa]
LOC110739371	XM_021919826.1	Known_gene	1	3272784	3273884	NW_018743476.1	-	1101	1029	XP_021775518.1|2.8e-193|uncharacterized protein LOC110739371 [Chenopodium quinoa]
LOC110739370	XM_021919825.1	Known_gene	1	3029771	3030580	NW_018743476.1	+	810	734	XP_021775517.1|3.1e-141|zinc finger BED domain-containing protein RICESLEEPER 2-like [Chenopodium quinoa]
LOC110739366	XM_021919824.1	Known_gene	1	1634451	1637323	NW_018742244.1	-	2873	2873	XP_021775516.1|0.0e+00|subtilisin-like protease SBT1.6 [Chenopodium quinoa]
LOC110739363	XM_021919823.1	Known_gene	1	662403	663164	NW_018743476.1	+	762	513	XP_021764255.1|5.4e-84|uncharacterized protein LOC110728896 [Chenopodium quinoa]
LOC110739361	XM_021919822.1	Known_gene	1	146243	147523	NW_018743476.1	-	1281	1281	XP_021775514.1|1.3e-67|auxin-responsive protein SAUR71 [Chenopodium quinoa]
LOC110739360	XM_021919821.1	Known_gene	1	60608	63105	NW_018742581.1	+	2498	2151	XP_021775513.1|0.0e+00|uncharacterized protein LOC110739360, partial [Chenopodium quinoa]
LOC110739358	XM_021919819.1	Known_gene	1	617572	625691	NW_018743466.1	+	8120	2654	XP_021775511.1|5.8e-299|serine/threonine-protein kinase PBL27-like [Chenopodium quinoa]
LOC110739356	XM_021919820.1	Known_gene	1	1630635	1633588	NW_018742244.1	-	2954	2085	XP_021775512.1|1.0e-210|protein EARLY-RESPONSIVE TO DEHYDRATION 7, chloroplastic-like [Chenopodium quinoa]
LOC110739355	XM_021919818.1	Known_gene	1	92131	94335	NW_018743466.1	+	2205	1680	XP_021775510.1|0.0e+00|uncharacterized protein LOC110739355 [Chenopodium quinoa]
LOC110739352	XM_021919816.1	Known_gene	1	2582411	2584471	NW_018743448.1	-	2061	1140	XP_021775508.1|2.8e-226|protein MAIN-LIKE 1-like [Chenopodium quinoa]
LOC110739351	XM_021919815.1	Known_gene	1	2579239	2581310	NW_018743448.1	+	2072	1908	XP_021775507.1|0.0e+00|uncharacterized protein LOC110739351 [Chenopodium quinoa]
LOC110739350	XM_021919817.1	Known_gene	1	1614843	1616593	NW_018742244.1	+	1751	1430	XP_021775509.1|2.3e-169|myb-related protein 308-like [Chenopodium quinoa]
LOC110739349	XM_021919814.1	Known_gene	1	2577879	2579235	NW_018743448.1	+	1357	654	XP_021775506.1|1.0e-124|uncharacterized protein LOC110739349 [Chenopodium quinoa]
LOC110739348	XM_021919813.1	Known_gene	1	2517507	2518541	NW_018743448.1	-	1035	1035	XP_021775505.1|1.2e-199|uncharacterized protein LOC110739348 [Chenopodium quinoa]
LOC110739345	BGI_novel_T005663,XM_021919812.1	Known_gene	2	2355899	2358026	NW_018743448.1	+	2128	1731	XP_021775504.1|1.6e-201|uncharacterized protein LOC110739345 [Chenopodium quinoa]
LOC110739344	BGI_novel_T005662,BGI_novel_T005661,XM_021919810.1,BGI_novel_T005659,BGI_novel_T005660	Known_gene	5	2282848	2287360	NW_018743448.1	-	4513	1569	XP_021775502.1|1.0e-156|uncharacterized protein LOC110739344 [Chenopodium quinoa]
LOC110739343	XM_021919809.1	Known_gene	1	2066520	2067501	NW_018743448.1	-	982	936	XP_021775501.1|3.0e-181|zinc finger BED domain-containing protein RICESLEEPER 2-like [Chenopodium quinoa]
LOC110739342	XM_021919811.1	Known_gene	1	1602172	1608645	NW_018742244.1	+	6474	1232	XP_021775503.1|1.5e-164|L-ascorbate peroxidase 3-like [Chenopodium quinoa]
LOC110739341	XM_021919808.1	Known_gene	1	1998713	1999520	NW_018743448.1	+	808	450	XP_021775500.1|1.1e-80|uncharacterized protein LOC110739341 [Chenopodium quinoa]
LOC110739340	XM_021919807.1	Known_gene	1	1980608	1981663	NW_018743448.1	+	1056	858	XP_021775499.1|7.4e-163|uncharacterized protein LOC110739340 [Chenopodium quinoa]
LOC110739339	XM_021919806.1	Known_gene	1	1949424	1951452	NW_018743448.1	-	2029	1851	XP_021775498.1|0.0e+00|uncharacterized protein LOC110739339 [Chenopodium quinoa]
LOC110739338	XM_021919805.1	Known_gene	1	1910231	1910757	NW_018743448.1	+	527	438	XP_021775497.1|4.5e-79|uncharacterized protein LOC110739338 [Chenopodium quinoa]
LOC110739337	XM_021919803.1	Known_gene	1	1766784	1781482	NW_018743448.1	+	14699	724	XP_021775495.1|1.6e-102|glutathione S-transferase-like [Chenopodium quinoa]
LOC110739336	XM_021919802.1	Known_gene	1	1749377	1751059	NW_018743448.1	-	1683	1380	XP_021775494.1|2.0e-282|uncharacterized protein LOC110739336 [Chenopodium quinoa]
LOC110739335	XM_021919804.1	Known_gene	1	1586347	1595636	NW_018742244.1	+	9290	2461	XP_021775496.1|0.0e+00|synaptotagmin-2-like [Chenopodium quinoa]
LOC110739334	XM_021919801.1	Known_gene	1	1721107	1724189	NW_018743448.1	-	3083	2031	XP_021775493.1|0.0e+00|uncharacterized protein LOC110739334 [Chenopodium quinoa]
LOC110739333	XM_021919800.1	Known_gene	1	1667118	1668704	NW_018743448.1	-	1587	1491	XP_021775492.1|1.3e-284|zinc finger MYM-type protein 1-like [Chenopodium quinoa]
LOC110739332	XM_021919799.1	Known_gene	1	1581178	1585134	NW_018743448.1	-	3957	2367	XP_021775491.1|0.0e+00|protein FAR1-RELATED SEQUENCE 5-like [Chenopodium quinoa]
LOC110739331	XM_021919798.1	Known_gene	1	1574864	1576776	NW_018743448.1	+	1913	1002	XP_021769727.1|5.1e-131|uncharacterized protein LOC110733968 [Chenopodium quinoa]
LOC110739330	XM_021919797.1	Known_gene	1	1443687	1446523	NW_018743448.1	-	2837	972	XP_021775489.1|6.2e-190|uncharacterized protein LOC110739330 [Chenopodium quinoa]
LOC110739329	XM_021919796.1	Known_gene	1	1370623	1372438	NW_018743448.1	+	1816	1581	XP_021775488.1|1.3e-311|uncharacterized protein LOC110739329 [Chenopodium quinoa]
LOC110739328	XM_021919795.1	Known_gene	1	1311497	1313259	NW_018743448.1	+	1763	1680	XP_021775487.1|0.0e+00|uncharacterized protein LOC110739328 [Chenopodium quinoa]
LOC110739327	XM_021919793.1	Known_gene	1	1182219	1184525	NW_018743448.1	-	2307	1068	XP_021775485.1|2.4e-203|uncharacterized protein LOC110739327 [Chenopodium quinoa]
LOC110739326	XM_021919794.1	Known_gene	1	1564314	1569635	NW_018742244.1	+	5322	2558	XP_021775486.1|0.0e+00|beta-galactosidase 14-like [Chenopodium quinoa]
LOC110739325	XM_021919792.1	Known_gene	1	1137310	1141313	NW_018743448.1	+	4004	1785	XP_021775484.1|0.0e+00|uncharacterized protein LOC110739325 [Chenopodium quinoa]
LOC110739323	XM_021919791.1	Known_gene	1	803040	804040	NW_018743448.1	+	1001	751	XP_021775483.1|5.8e-143|uncharacterized protein LOC110739323 [Chenopodium quinoa]
LOC110739322	XM_021919790.1	Known_gene	1	799662	802160	NW_018743448.1	+	2499	1791	XP_021775482.1|0.0e+00|uncharacterized protein LOC110739322 [Chenopodium quinoa]
LOC110739321	XM_021919788.1	Known_gene	1	792552	793037	NW_018743448.1	-	486	486	XP_021775480.1|1.4e-89|uncharacterized protein LOC110739321 [Chenopodium quinoa]
LOC110739320	XM_021919787.1	Known_gene	1	710840	712368	NW_018743448.1	+	1529	762	XP_021775479.1|1.9e-149|uncharacterized protein LOC110739320 [Chenopodium quinoa]
LOC110739318	XM_021919785.1	Known_gene	1	637911	638766	NW_018743448.1	+	856	675	XP_021775477.1|1.8e-127|uncharacterized protein LOC110739318 [Chenopodium quinoa]
LOC110739317	XM_021919784.1	Known_gene	1	621964	622557	NW_018743448.1	+	594	594	XP_021775476.1|1.0e-110|uncharacterized protein LOC110739317 [Chenopodium quinoa]
LOC110739316	XM_021919783.1	Known_gene	1	608752	610127	NW_018743448.1	+	1376	1104	XP_021775475.1|2.8e-215|protein FAR1-RELATED SEQUENCE 5-like [Chenopodium quinoa]
LOC110739315	XM_021919789.1,XM_021919786.1	Known_gene	2	1569039	1581285	NW_018742244.1	-	12247	6790	XP_021775478.1|0.0e+00|E3 ubiquitin-protein ligase UPL3-like [Chenopodium quinoa]
LOC110739314	XM_021919782.1	Known_gene	1	542889	543218	NW_018743448.1	-	330	330	XP_021775474.1|2.0e-52|ferritin-1, chloroplastic-like [Chenopodium quinoa]
LOC110739313	XM_021919781.1	Known_gene	1	533152	535853	NW_018743448.1	-	2702	1104	XP_021775473.1|1.5e-216|beta-glucosidase 3-like [Chenopodium quinoa]
LOC110739312	XM_021919780.1	Known_gene	1	438905	439753	NW_018743448.1	+	849	849	XP_021775472.1|1.7e-167|uncharacterized protein LOC110739312 [Chenopodium quinoa]
LOC110739311	XM_021919779.1	Known_gene	1	312734	333617	NW_018743448.1	+	20884	1449	XP_021775471.1|1.5e-272|protein starmaker-like [Chenopodium quinoa]
LOC110739310	XM_021919778.1	Known_gene	1	22894	25289	NW_018743448.1	-	2396	858	XP_021775470.1|1.4e-137|glutamic acid-rich protein-like [Chenopodium quinoa]
LOC110739309	XM_021919777.1	Known_gene	1	4327	8722	NW_018743448.1	-	4396	779	XP_021775469.1|7.4e-93|uncharacterized protein LOC110739309 [Chenopodium quinoa]
LOC110739308	XM_021919775.1	Known_gene	1	3101287	3104922	NW_018743448.1	+	3636	2340	XP_021719684.1|1.1e-171|uncharacterized protein LOC110687350 [Chenopodium quinoa]
LOC110739307	XM_021919774.1,XM_021919772.1,XM_021919773.1	Known_gene	3	3070864	3080003	NW_018743448.1	+	9140	1829	XP_021775464.1|4.4e-151|uncharacterized protein LOC110739307 isoform X1 [Chenopodium quinoa]
LOC110739306	XM_021919776.1	Known_gene	1	1545539	1549270	NW_018742244.1	-	3732	1671	XP_021775468.1|9.8e-236|protein MCM10 homolog [Chenopodium quinoa]
LOC110739305	BGI_novel_T005670,XM_021919771.1	Known_gene	2	3033541	3046545	NW_018743448.1	+	13005	1805	XP_021775463.1|3.1e-235|peptide chain release factor APG3, chloroplastic-like [Chenopodium quinoa]
LOC110739304	XM_021919770.1	Known_gene	1	3027016	3031803	NW_018743448.1	+	4788	946	XP_021775462.1|3.9e-56|uncharacterized protein LOC110739304 [Chenopodium quinoa]
LOC110739303	XM_021919768.1,XM_021919769.1	Known_gene	2	2931368	2941381	NW_018743448.1	+	10014	3075	XP_021775461.1|0.0e+00|nuclear pore complex protein NUP98A-like isoform X2 [Chenopodium quinoa]
LOC110739302	XM_021919767.1	Known_gene	1	2924507	2928518	NW_018743448.1	-	4012	986	XP_021775459.1|1.3e-115|UPF0664 stress-induced protein C29B12.11c-like [Chenopodium quinoa]
LOC110739301	XM_021919766.1	Known_gene	1	2902357	2915487	NW_018743448.1	-	13131	6198	XP_021775458.1|0.0e+00|uncharacterized protein LOC110739301 [Chenopodium quinoa]
LOC110739300	XM_021919765.1	Known_gene	1	2874411	2883166	NW_018743448.1	+	8756	3607	XP_021775457.1|0.0e+00|homeobox protein LUMINIDEPENDENS-like [Chenopodium quinoa]
LOC110739297	XM_021919763.1	Known_gene	1	2807209	2811375	NW_018743448.1	-	4167	1086	XP_021775455.1|6.7e-52|exonuclease V, chloroplastic-like [Chenopodium quinoa]
LOC110739296	XM_021919764.1	Known_gene	1	1534703	1536887	NW_018742244.1	-	2185	1109	XP_021775456.1|5.8e-83|ubiquitin-conjugating enzyme E2-17 kDa-like [Chenopodium quinoa]
LOC110739294	XM_021919761.1,XM_021919762.1	Known_gene	2	2777260	2779131	NW_018743448.1	-	1872	914	XP_021732975.1|6.3e-88|uncharacterized protein LOC110699766 [Chenopodium quinoa]
LOC110739293	XM_021919760.1	Known_gene	1	2773163	2777251	NW_018743448.1	+	4089	3737	XP_021775452.1|0.0e+00|uncharacterized protein LOC110739293 [Chenopodium quinoa]
LOC110739291	XM_021919759.1,XM_021919757.1	Known_gene	2	2670147	2688327	NW_018743448.1	-	18181	2237	XP_021775449.1|5.8e-292|metal tolerance protein 2-like isoform X1 [Chenopodium quinoa]
LOC110739290	XM_021919756.1	Known_gene	1	2621651	2622491	NW_018743448.1	+	841	841	XP_021775448.1|2.4e-97|nuclear transcription factor Y subunit B-5-like [Chenopodium quinoa]
LOC110739289	XM_021919755.1	Known_gene	1	2546057	2561871	NW_018743448.1	-	15815	1935	XP_021775447.1|4.1e-262|chaperone protein dnaJ GFA2, mitochondrial-like [Chenopodium quinoa]
LOC110739288	XM_021919754.1	Known_gene	1	2538795	2544986	NW_018743448.1	+	6192	2547	XP_021856163.1|0.0e+00|potassium transporter 5-like [Spinacia oleracea]
LOC110739286	XM_021919753.1	Known_gene	1	2488577	2493294	NW_018743448.1	+	4718	2354	XP_021775445.1|6.8e-275|wee1-like protein kinase [Chenopodium quinoa]
LOC110739285	XM_021919752.1	Known_gene	1	2477099	2484662	NW_018743448.1	-	7564	1969	XP_021775444.1|5.1e-292|uncharacterized protein LOC110739285 [Chenopodium quinoa]
LOC110739284	XM_021919750.1	Known_gene	1	2470713	2472172	NW_018743448.1	-	1460	1460	XP_021775442.1|1.6e-194|protein SRC2-like [Chenopodium quinoa]
LOC110739283	XM_021919749.1	Known_gene	1	2408485	2416817	NW_018743448.1	-	8333	1952	XP_021775441.1|2.1e-261|autophagy-related protein 18a-like [Chenopodium quinoa]
LOC110739282	XM_021919748.1	Known_gene	1	2395589	2397285	NW_018743448.1	-	1697	933	XP_021775440.1|7.7e-121|glutathione S-transferase-like [Chenopodium quinoa]
LOC110739281	XM_021919747.1	Known_gene	1	2399930	2402487	NW_018743448.1	-	2558	1073	XP_021775439.1|1.5e-123|glutathione S-transferase F13-like [Chenopodium quinoa]
LOC110739279	XM_021919746.1	Known_gene	1	2374205	2375746	NW_018743448.1	-	1542	1542	XP_021775438.1|2.0e-70|glutathione S-transferase-like [Chenopodium quinoa]
LOC110739278	XM_021919744.1,BGI_novel_T005665,XM_021919742.1,BGI_novel_T005664,XM_021919745.1	Known_gene	5	2364608	2377557	NW_018743448.1	-	12950	1580	XP_021775434.1|2.7e-137|glutathione S-transferase-like isoform X1 [Chenopodium quinoa]
LOC110739276	XM_021919740.1,BGI_novel_T005655,BGI_novel_T005658,BGI_novel_T005657,BGI_novel_T005656,XM_021919739.1,XM_021919741.1	Known_gene	7	1998082	2006535	NW_018743448.1	+	8454	4928	XP_021775431.1|8.1e-187|cell division control protein 2 homolog isoform X1 [Chenopodium quinoa]
LOC110739273	XM_021919738.1	Known_gene	1	1938049	1940870	NW_018743448.1	-	2822	746	XP_021775430.1|9.3e-45|heat shock factor-binding protein 1-like [Chenopodium quinoa]
LOC110739272	XM_021919736.1	Known_gene	1	1924178	1935531	NW_018743448.1	+	11354	4423	XP_021775428.1|8.6e-255|protein LOW PSII ACCUMULATION 1, chloroplastic-like [Chenopodium quinoa]
LOC110739271	XM_021919735.1	Known_gene	1	1914608	1917741	NW_018743448.1	-	3134	2073	XP_021775427.1|0.0e+00|putative indole-3-acetic acid-amido synthetase GH3.9 [Chenopodium quinoa]
LOC110739270	XM_021919737.1,XM_021919751.1,XM_021919758.1,XM_021919743.1	Known_gene	4	1537807	1543702	NW_018742244.1	-	5896	1367	XP_021753069.1|1.6e-108|rac-like GTP-binding protein 5 [Chenopodium quinoa]
LOC110739269	XM_021919733.1,XM_021919734.1	Known_gene	2	1865421	1877261	NW_018743448.1	-	11841	6678	XP_021775425.1|2.6e-239|heavy metal-associated isoprenylated plant protein 36-like [Chenopodium quinoa]
LOC110739268	XM_021919732.1	Known_gene	1	1877360	1881974	NW_018743448.1	-	4615	3182	XP_021775424.1|0.0e+00|pentatricopeptide repeat-containing protein At2g26790, mitochondrial-like [Chenopodium quinoa]
LOC110739265	XM_021919731.1	Known_gene	1	1824343	1827384	NW_018743448.1	+	3042	970	XP_021775423.1|1.7e-118|glutathione S-transferase-like [Chenopodium quinoa]
LOC110739264	XM_021919730.1	Known_gene	1	1742176	1744504	NW_018743448.1	+	2329	971	XP_021775422.1|1.8e-120|glutathione S-transferase-like [Chenopodium quinoa]
LOC110739261	XM_021919728.1	Known_gene	1	1587754	1589655	NW_018743448.1	+	1902	1902	XP_021775420.1|5.1e-273|xyloglucan 6-xylosyltransferase 2-like [Chenopodium quinoa]
LOC110739260	XM_021919726.1,XM_021919727.1	Known_gene	2	1481432	1486618	NW_018743448.1	-	5187	1689	XP_021775418.1|6.0e-241|putative F-box/LRR-repeat protein At5g54820 isoform X1 [Chenopodium quinoa]
LOC110739259	XM_021919725.1,XM_021919724.1	Known_gene	2	1363729	1366926	NW_018743448.1	+	3198	1694	XP_021775416.1|5.6e-198|cell division control protein 2 homolog isoform X1 [Chenopodium quinoa]
LOC110739257	XM_021919721.1,XM_021919723.1	Known_gene	2	1245566	1250956	NW_018743448.1	+	5391	1720	XP_021775415.1|3.8e-203|putative F-box/LRR-repeat protein At3g58880 isoform X2 [Chenopodium quinoa]
LOC110739256	XM_021919719.1,XM_021919720.1	Known_gene	2	1236569	1241132	NW_018743448.1	+	4564	1702	XP_021775412.1|1.0e-203|putative F-box/LRR-repeat protein At5g54820 isoform X2 [Chenopodium quinoa]
LOC110739255	XM_021919718.1	Known_gene	1	1212097	1213796	NW_018743448.1	-	1700	1274	XP_021775410.1|9.6e-66|small nuclear ribonucleoprotein Sm D2-like [Chenopodium quinoa]
LOC110739254	XM_021919729.1,XM_021919722.1,BGI_novel_T000562	Known_gene	3	1513486	1517925	NW_018742244.1	-	4440	2851	XP_021775414.1|0.0e+00|probable serine/threonine-protein kinase PIX7 isoform X1 [Chenopodium quinoa]
LOC110739253	XM_021919717.1	Known_gene	1	1199679	1205115	NW_018743448.1	+	5437	1909	XP_021775409.1|6.1e-258|UDP-glucuronic acid decarboxylase 2-like [Chenopodium quinoa]
LOC110739251	XM_021919716.1	Known_gene	1	1131833	1135533	NW_018743448.1	-	3701	1215	XP_021775408.1|4.1e-50|complex III assembly factor LYRM7-like [Chenopodium quinoa]
LOC110739250	XM_021919714.1,XM_021919715.1	Known_gene	2	1115671	1122281	NW_018743448.1	+	6611	1785	XP_021775407.1|8.3e-182|peter Pan-like protein isoform X2 [Chenopodium quinoa]
LOC110739249	XM_021919712.1,XM_021919713.1	Known_gene	2	984650	989349	NW_018743448.1	+	4700	784	XP_021775404.1|7.0e-83|ubiquitin-conjugating enzyme E2 8-like [Chenopodium quinoa]
LOC110739248	BGI_novel_T005645,BGI_novel_T005644,XM_021919710.1	Known_gene	3	933587	947967	NW_018743448.1	-	14381	4483	XP_021775402.1|1.0e-211|uncharacterized protein LOC110739248 [Chenopodium quinoa]
LOC110739247	XM_021919709.1	Known_gene	1	949289	956351	NW_018743448.1	+	7063	1571	XP_021775401.1|6.0e-235|26S proteasome regulatory subunit 6B homolog [Chenopodium quinoa]
LOC110739246	XM_021919708.1	Known_gene	1	938753	941194	NW_018743448.1	-	2442	2205	XP_021775400.1|0.0e+00|uncharacterized protein LOC110739246 [Chenopodium quinoa]
LOC110739245	XM_021919707.1	Known_gene	1	868226	875102	NW_018743448.1	+	6877	990	XP_021775399.1|7.1e-109|CBS domain-containing protein CBSX3, mitochondrial-like [Chenopodium quinoa]
LOC110739244	XM_021919706.1	Known_gene	1	848465	853439	NW_018743448.1	+	4975	1550	XP_021775398.1|5.4e-172|uncharacterized protein LOC110739244 [Chenopodium quinoa]
LOC110739243	XM_021919705.1	Known_gene	1	825289	837748	NW_018743448.1	+	12460	3589	XP_021775397.1|0.0e+00|DExH-box ATP-dependent RNA helicase DExH8-like [Chenopodium quinoa]
LOC110739242	XM_021919699.1,XM_021919701.1,BGI_novel_T005642,XM_021919702.1,XM_021919700.1,XM_021919703.1,BGI_novel_T005643,BGI_novel_T005640,BGI_novel_T005641	Known_gene	9	780620	788018	NW_018743448.1	-	7399	1952	XP_021775394.1|1.5e-143|serine/arginine-rich splicing factor SR34B-like isoform X4 [Chenopodium quinoa]
LOC110739241	XM_021919711.1,XM_021919704.1	Known_gene	2	1498200	1502864	NW_018742244.1	-	4665	1722	XP_021753063.1|4.6e-164|basic leucine zipper 23-like isoform X1 [Chenopodium quinoa]
LOC110739240	XM_021919698.1	Known_gene	1	771432	772992	NW_018743448.1	-	1561	1561	XP_021775390.1|1.0e-210|phytochrome A-associated F-box protein-like [Chenopodium quinoa]
LOC110739239	XM_021919697.1,BGI_novel_T005638	Known_gene	2	659320	672363	NW_018743448.1	-	13044	2737	XP_021775389.1|0.0e+00|cyanidin 3-O-glucoside 5-O-glucosyltransferase (acyl-glucose)-like [Chenopodium quinoa]
LOC110739238	XM_021919696.1	Known_gene	1	586895	606217	NW_018743448.1	-	19323	2608	XP_021775388.1|2.1e-311|beta-glucosidase 31-like [Chenopodium quinoa]
LOC110739236	XM_021919695.1	Known_gene	1	546584	566547	NW_018743448.1	-	19964	1959	XP_021775387.1|0.0e+00|cyanidin 3-O-glucoside 5-O-glucosyltransferase (acyl-glucose)-like [Chenopodium quinoa]
LOC110739235	XM_021919694.1,XM_021919693.1	Known_gene	2	477072	481990	NW_018743448.1	-	4919	1738	XP_021775385.1|0.0e+00|putative beta-glucosidase 5 [Chenopodium quinoa]
LOC110739234	XM_021919691.1	Known_gene	1	466347	475271	NW_018743448.1	+	8925	1458	XP_021775383.1|2.9e-151|E3 ubiquitin-protein ligase RFI2-like [Chenopodium quinoa]
LOC110739233	XM_021919690.1	Known_gene	1	450870	455002	NW_018743448.1	+	4133	1079	XP_021775382.1|1.2e-88|universal stress protein PHOS34-like [Chenopodium quinoa]
LOC110739232	XM_021919688.1,XM_021919689.1	Known_gene	2	407650	413855	NW_018743448.1	-	6206	3000	XP_021775380.1|1.4e-195|probable E3 ubiquitin-protein ligase BAH1-like 1 isoform X1 [Chenopodium quinoa]
LOC110739231	XM_021919692.1	Known_gene	1	1494929	1497544	NW_018742244.1	+	2616	1535	XP_021775384.1|5.8e-235|WD-40 repeat-containing protein MSI2-like [Chenopodium quinoa]
LOC110739230	XM_021919687.1	Known_gene	1	380348	384272	NW_018743448.1	-	3925	953	XP_021775379.1|2.8e-110|nucleolar protein 16-like [Chenopodium quinoa]
LOC110739228	XM_021919686.1	Known_gene	1	349574	359050	NW_018743448.1	+	9477	1837	XP_021775378.1|4.3e-285|uncharacterized WD repeat-containing protein C17D11.16-like [Chenopodium quinoa]
LOC110739227	XM_021919684.1,XM_021919685.1	Known_gene	2	272252	283683	NW_018743448.1	-	11432	5359	XP_021848908.1|0.0e+00|ABC transporter C family member 14-like [Spinacia oleracea]
LOC110739226	XM_021919683.1	Known_gene	1	265473	271942	NW_018743448.1	+	6470	5021	XP_021763160.1|0.0e+00|ABC transporter C family member 14-like [Chenopodium quinoa]
LOC110739225	XM_021919682.1	Known_gene	1	241050	245985	NW_018743448.1	-	4936	1088	XP_021775374.1|2.9e-111|uncharacterized protein OsI_027940-like [Chenopodium quinoa]
LOC110739224	XM_021919680.1	Known_gene	1	228807	235913	NW_018743448.1	-	7107	1087	XP_021775372.1|8.1e-82|sm-like protein LSM4 [Chenopodium quinoa]
LOC110739223	XM_021919679.1,XM_021919678.1	Known_gene	2	223315	227692	NW_018743448.1	+	4378	1596	XP_021775370.1|3.8e-229|WD repeat-containing protein 89 homolog isoform X1 [Chenopodium quinoa]
LOC110739222	XM_021919681.1	Known_gene	1	1487487	1490216	NW_018742244.1	+	2730	867	XP_021775373.1|4.3e-86|heavy metal-associated isoprenylated plant protein 26-like [Chenopodium quinoa]
LOC110739221	XM_021919677.1	Known_gene	1	181442	215885	NW_018743448.1	+	34444	1034	XP_021775369.1|2.0e-114|uncharacterized protein LOC110739221 [Chenopodium quinoa]
LOC110739219	XM_021919676.1,XM_021919675.1	Known_gene	2	140498	157680	NW_018743448.1	-	17183	3769	XP_021775367.1|0.0e+00|DNA mismatch repair protein PMS1-like isoform X1 [Chenopodium quinoa]
LOC110739218	XM_021919674.1,XM_021919673.1	Known_gene	2	132075	136915	NW_018743448.1	+	4841	1117	XP_021763170.1|2.4e-145|thiamine pyrophosphokinase 2-like isoform X1 [Chenopodium quinoa]
LOC110739217	XM_021919671.1,XM_021919672.1	Known_gene	2	109432	128076	NW_018743448.1	+	18645	4664	XP_021775364.1|0.0e+00|uncharacterized protein LOC110739217 isoform X2 [Chenopodium quinoa]
LOC110739216	XM_021919670.1	Known_gene	1	95837	100848	NW_018743448.1	-	5012	1146	XP_021775362.1|5.0e-130|membrin-11-like [Chenopodium quinoa]
LOC110739215	XM_021919668.1	Known_gene	1	81362	86455	NW_018743448.1	-	5094	5013	XP_021775360.1|0.0e+00|translocase of chloroplast 159, chloroplastic-like [Chenopodium quinoa]
LOC110739214	XM_021919667.1	Known_gene	1	75115	78110	NW_018743448.1	+	2996	1072	XP_021775359.1|7.7e-141|stress-related protein-like [Chenopodium quinoa]
LOC110739213	XM_021919666.1	Known_gene	1	68690	74632	NW_018743448.1	+	5943	1841	XP_021775358.1|2.5e-208|caffeoylshikimate esterase-like [Chenopodium quinoa]
LOC110739212	XM_021919669.1	Known_gene	1	1455568	1457448	NW_018742244.1	-	1881	1763	XP_021743050.1|1.3e-198|probable BOI-related E3 ubiquitin-protein ligase 2 [Chenopodium quinoa]
LOC110739211	XM_021919665.1	Known_gene	1	49276	55297	NW_018743448.1	+	6022	883	XP_021775357.1|7.3e-65|outer envelope pore protein 16-4, chloroplastic-like [Chenopodium quinoa]
LOC110739208	XM_021919664.1	Known_gene	1	927	2737	NW_018743448.1	+	1811	711	XP_021775356.1|4.5e-137|protein FAR-RED IMPAIRED RESPONSE 1-like [Chenopodium quinoa]
LOC110739207	XM_021919663.1	Known_gene	1	3094788	3100931	NW_018743448.1	+	6144	2121	XP_021775355.1|0.0e+00|uncharacterized protein LOC110739207 [Chenopodium quinoa]
LOC110739206	XM_021919661.1	Known_gene	1	2844934	2846681	NW_018743448.1	-	1748	1380	XP_021775353.1|1.9e-277|protein MAIN-LIKE 1-like [Chenopodium quinoa]
LOC110739205	XM_021919660.1	Known_gene	1	2806992	2807575	NW_018743448.1	+	584	306	XP_021775352.1|9.4e-52|uncharacterized protein LOC110739205 [Chenopodium quinoa]
LOC110739204	XM_021919659.1	Known_gene	1	2767261	2768142	NW_018743448.1	-	882	762	XP_021775351.1|8.1e-145|uncharacterized protein LOC110739204 [Chenopodium quinoa]
LOC110739203	XM_021919662.1	Known_gene	1	1439367	1443495	NW_018742244.1	+	4129	2008	XP_021775354.1|4.2e-209|uncharacterized protein LOC110739203 [Chenopodium quinoa]
LOC110739202	XM_021919658.1	Known_gene	1	2757610	2758374	NW_018743448.1	-	765	765	XP_021775350.1|5.6e-146|uncharacterized protein LOC110739202 [Chenopodium quinoa]
LOC110739201	XM_021919657.1	Known_gene	1	2733835	2735390	NW_018743448.1	+	1556	939	XP_021775349.1|9.9e-177|uncharacterized protein LOC110739201 [Chenopodium quinoa]
LOC110739200	XM_021919656.1	Known_gene	1	2728652	2733812	NW_018743448.1	+	5161	2016	XP_021775348.1|0.0e+00|uncharacterized protein LOC110739200 [Chenopodium quinoa]
LOC110739199	XM_021919655.1,BGI_novel_T005669	Known_gene	2	3013151	3015599	NW_018743448.1	-	2449	1037	XP_021775347.1|1.7e-75|heavy metal-associated isoprenylated plant protein 39-like [Chenopodium quinoa]
LOC110739197	XM_021919654.1	Known_gene	1	2356359	2358026	NW_018743448.1	+	1668	1592	XP_021750346.1|1.9e-156|uncharacterized protein LOC110716021 [Chenopodium quinoa]
LOC110739196	XM_021919652.1	Known_gene	1	1974937	1976375	NW_018743448.1	+	1439	1439	XP_021775343.1|1.3e-106|translocator protein homolog [Chenopodium quinoa]
LOC110739193	XM_021919653.1	Known_gene	1	1421301	1423625	NW_018742244.1	-	2325	875	XP_021743046.1|3.0e-87|SKP1-like protein 1A [Chenopodium quinoa]
LOC110739192	XM_021919651.1	Known_gene	1	1590614	1592101	NW_018743448.1	-	1488	1488	XP_021775343.1|1.3e-106|translocator protein homolog [Chenopodium quinoa]
LOC110739191	XM_021919650.1	Known_gene	1	1144137	1145096	NW_018743448.1	+	960	960	XP_021775342.1|4.8e-110|pectinesterase inhibitor 6-like [Chenopodium quinoa]
LOC110739189	XM_021919649.1	Known_gene	1	520167	525580	NW_018743448.1	+	5414	1272	XP_021775341.1|3.4e-156|uncharacterized protein LOC110739189 [Chenopodium quinoa]
LOC110739186	XM_021919648.1	Known_gene	1	1875023	1877434	NW_018743444.1	+	2412	1560	XP_021727371.1|4.6e-219|60S ribosomal protein L4-like isoform X2 [Chenopodium quinoa]
LOC110739185	XM_021919646.1	Known_gene	1	1822958	1831257	NW_018743444.1	-	8300	1870	XP_021775338.1|1.4e-259|probable N-acetyl-gamma-glutamyl-phosphate reductase, chloroplastic [Chenopodium quinoa]
LOC110739184	XM_021919645.1	Known_gene	1	1550474	1557214	NW_018743444.1	+	6741	2562	XP_021775337.1|0.0e+00|endochitinase A-like [Chenopodium quinoa]
LOC110739182	XM_021919647.1	Known_gene	1	1425437	1429047	NW_018742244.1	-	3611	1701	XP_021775339.1|1.3e-219|glycerate dehydrogenase HPR, peroxisomal [Chenopodium quinoa]
LOC110739179	XM_021919644.1	Known_gene	1	1090183	1093692	NW_018743444.1	+	3510	2554	XP_021745215.1|0.0e+00|serine/threonine-protein phosphatase 7 long form homolog [Chenopodium quinoa]
LOC110739178	XM_021919643.1	Known_gene	1	1073527	1075418	NW_018743444.1	+	1892	1892	XP_021775335.1|1.2e-250|DNA topoisomerase 6 subunit A-like [Chenopodium quinoa]
LOC110739177	XM_021919642.1	Known_gene	1	916286	924515	NW_018743444.1	-	8230	1816	XP_021775334.1|1.4e-214|zinc finger CCCH domain-containing protein 11-like [Chenopodium quinoa]
LOC110739176	XM_021919641.1,XM_021919639.1,XM_021919640.1	Known_gene	3	602116	609771	NW_018743444.1	+	7656	1619	XP_021775332.1|8.5e-168|protein REVEILLE 8-like isoform X2 [Chenopodium quinoa]
LOC110739174	XM_021919638.1,BGI_novel_T005630	Known_gene	2	161880	175180	NW_018743444.1	+	13301	5899	XP_021775330.1|7.3e-108|protein MODIFIER OF SNC1 11-like [Chenopodium quinoa]
LOC110739173	XM_021919637.1	Known_gene	1	1794925	1795475	NW_018743444.1	+	551	457	XP_021775329.1|1.1e-53|uncharacterized protein LOC110739173 [Chenopodium quinoa]
LOC110739171	XM_021919636.1	Known_gene	1	1866531	1867345	NW_018743444.1	-	815	612	XP_021775328.1|3.6e-111|uncharacterized protein LOC110739171 [Chenopodium quinoa]
LOC110739170	XM_021919635.1	Known_gene	1	1624279	1657777	NW_018743444.1	-	33499	1617	XP_021775327.1|0.0e+00|protein starmaker-like [Chenopodium quinoa]
LOC110739169	XM_021919634.1	Known_gene	1	1615398	1616319	NW_018743444.1	-	922	798	XP_021775326.1|1.3e-156|uncharacterized protein LOC110739169 [Chenopodium quinoa]
LOC110739168	XM_021919633.1	Known_gene	1	1534384	1534869	NW_018743444.1	-	486	486	XP_021775325.1|9.0e-89|uncharacterized protein LOC110739168 [Chenopodium quinoa]
LOC110739167	XM_021919632.1	Known_gene	1	1531076	1532007	NW_018743444.1	-	932	840	XP_021775324.1|2.1e-162|uncharacterized protein LOC110739167 [Chenopodium quinoa]
LOC110739166	XM_021919631.1	Known_gene	1	1476240	1476719	NW_018743444.1	-	480	480	XP_021775323.1|3.3e-83|uncharacterized protein LOC110739166 [Chenopodium quinoa]
LOC110739164	XM_021919629.1	Known_gene	1	322110	322688	NW_018743444.1	+	579	579	XP_021775321.1|3.4e-103|uncharacterized protein LOC110739164 [Chenopodium quinoa]
LOC110739163	XM_021919628.1	Known_gene	1	212413	213366	NW_018743444.1	+	954	954	XP_021775320.1|2.0e-177|uncharacterized protein LOC110739163 [Chenopodium quinoa]
LOC110739162	XM_021919627.1	Known_gene	1	138575	141823	NW_018743444.1	+	3249	3249	XP_021775319.1|0.0e+00|uncharacterized protein LOC110739162 [Chenopodium quinoa]
LOC110739161	XM_021919625.1	Known_gene	1	20526	21248	NW_018743444.1	-	723	723	XP_021775317.1|3.4e-132|uncharacterized protein LOC110739161 [Chenopodium quinoa]
LOC110739160	XM_021919624.1	Known_gene	1	270	1820	NW_018743440.1	-	1551	1096	XP_021775316.1|5.0e-212|uncharacterized protein LOC110739160, partial [Chenopodium quinoa]
LOC110739159	XM_021919630.1,XM_021919626.1	Known_gene	2	1340076	1345514	NW_018742244.1	+	5439	1627	XP_021775318.1|2.1e-174|pre-mRNA-splicing factor syf2-like [Chenopodium quinoa]
LOC110739158	XM_021919622.1,XM_021919623.1	Known_gene	2	655108	659949	NW_018743434.1	+	4842	1123	XP_021775314.1|2.1e-96|uncharacterized protein LOC110739158 isoform X1 [Chenopodium quinoa]
LOC110739157	XM_021919621.1	Known_gene	1	648492	653951	NW_018743434.1	+	5460	1465	XP_021775303.1|6.8e-132|single-stranded DNA-bindig protein WHY2, mitochondrial-like [Chenopodium quinoa]
LOC110739156	XM_021919619.1,XM_021919620.1	Known_gene	2	638513	645000	NW_018743434.1	+	6488	2587	XP_021775312.1|4.2e-169|RNA-binding protein 24-B-like isoform X2 [Chenopodium quinoa]
LOC110739155	XM_021919618.1	Known_gene	1	631484	634383	NW_018743434.1	+	2900	1170	XP_021775305.1|9.0e-111|DNA repair RAD52-like protein 1, mitochondrial [Chenopodium quinoa]
LOC110739153	XM_021919616.1	Known_gene	1	503425	507002	NW_018743434.1	+	3578	868	XP_021856853.1|4.5e-67|uncharacterized protein LOC110796131 [Spinacia oleracea]
LOC110739152	XM_021919615.1,XM_021919614.1	Known_gene	2	507100	510759	NW_018743434.1	-	3660	1910	XP_021775306.1|2.8e-255|probable beta-1,3-galactosyltransferase 8 isoform X1 [Chenopodium quinoa]
LOC110739151	XM_021919617.1	Known_gene	1	1330248	1331162	NW_018742244.1	-	915	915	XP_021753052.1|6.2e-91|uncharacterized protein LOC110718516 [Chenopodium quinoa]
LOC110739149	XM_021919613.1	Known_gene	1	486039	488898	NW_018743434.1	-	2860	1131	XP_021775305.1|8.7e-111|DNA repair RAD52-like protein 1, mitochondrial [Chenopodium quinoa]
LOC110739148	BGI_novel_T005626,BGI_novel_T005624,BGI_novel_T005625,XM_021919612.1	Known_gene	4	475349	481973	NW_018743434.1	-	6625	4272	XP_021775304.1|3.2e-172|RNA-binding protein 24-B-like [Chenopodium quinoa]
LOC110739147	XM_021919611.1	Known_gene	1	462562	467903	NW_018743434.1	-	5342	1346	XP_021775303.1|6.2e-132|single-stranded DNA-bindig protein WHY2, mitochondrial-like [Chenopodium quinoa]
LOC110739146	XM_021919610.1,XM_021919609.1	Known_gene	2	456465	461401	NW_018743434.1	-	4937	1209	XP_021775301.1|1.0e-96|uncharacterized protein LOC110739146 isoform X1 [Chenopodium quinoa]
LOC110739145	XM_021919608.1	Known_gene	1	428937	436080	NW_018743434.1	-	7144	2216	XP_021775300.1|2.0e-119|RING-H2 finger protein ATL7-like [Chenopodium quinoa]
LOC110739144	XM_021919606.1	Known_gene	1	425064	426762	NW_018743434.1	+	1699	1699	XP_021775298.1|5.6e-154|phytolongin Phyl1.1-like [Chenopodium quinoa]
LOC110739143	XM_021919605.1	Known_gene	1	416051	422502	NW_018743434.1	+	6452	1971	XP_021775297.1|1.1e-193|glycerophosphodiester phosphodiesterase GDPD4-like [Chenopodium quinoa]
LOC110739142	XM_021919604.1	Known_gene	1	404347	410813	NW_018743434.1	+	6467	2342	XP_021775296.1|0.0e+00|LOW QUALITY PROTEIN: eukaryotic translation initiation factor 2D-like [Chenopodium quinoa]
LOC110739141	BGI_novel_T005623,XM_021919603.1	Known_gene	2	386589	401811	NW_018743434.1	-	15223	2241	XP_021775295.1|1.1e-298|eukaryotic peptide chain release factor GTP-binding subunit ERF3A-like [Chenopodium quinoa]
LOC110739140	XM_021919602.1	Known_gene	1	372684	385882	NW_018743434.1	-	13199	3733	XP_021775294.1|0.0e+00|LOW QUALITY PROTEIN: SCY1-like protein 2 [Chenopodium quinoa]
LOC110739139	XM_021919600.1	Known_gene	1	357912	360147	NW_018743434.1	+	2236	907	XP_021775292.1|2.9e-101|spliceosome-associated protein 49-like [Chenopodium quinoa]
LOC110739138	XM_021919599.1,XM_021919598.1,XM_021919597.1,XM_021919596.1	Known_gene	4	347330	353524	NW_018743434.1	-	6195	2272	XP_021775288.1|0.0e+00|uncharacterized protein slp1-like [Chenopodium quinoa]
LOC110739137	XM_021919595.1	Known_gene	1	340836	345176	NW_018743434.1	+	4341	1597	XP_021775287.1|8.4e-160|uncharacterized protein LOC110739137 [Chenopodium quinoa]
LOC110739136	XM_021919594.1	Known_gene	1	303689	312108	NW_018743434.1	+	8420	3448	XP_021775286.1|0.0e+00|histidine--tRNA ligase, cytoplasmic-like [Chenopodium quinoa]
LOC110739135	BGI_novel_T005621,XM_021919593.1	Known_gene	2	297542	301723	NW_018743434.1	+	4182	2595	XP_021775285.1|6.6e-150|probable protein phosphatase 2C 32 [Chenopodium quinoa]
LOC110739134	XM_021919591.1	Known_gene	1	291362	296610	NW_018743434.1	+	5249	2529	XP_021775283.1|4.0e-140|protein PARTING DANCERS [Chenopodium quinoa]
LOC110739133	BGI_novel_T005620,XM_021919590.1	Known_gene	2	285819	290780	NW_018743434.1	-	4962	1456	XP_021775282.1|1.7e-76|uncharacterized protein LOC110739133 [Chenopodium quinoa]
LOC110739132	XM_021919589.1	Known_gene	1	279883	285492	NW_018743434.1	-	5610	1395	XP_021775281.1|4.0e-190|uncharacterized protein LOC110739132 [Chenopodium quinoa]
LOC110739131	XM_021919587.1,XM_021919588.1	Known_gene	2	274558	276347	NW_018743434.1	-	1790	1427	XP_021775279.1|5.8e-128|uncharacterized protein LOC110739131 isoform X1 [Chenopodium quinoa]
LOC110739130	XM_021919586.1	Known_gene	1	256489	258701	NW_018743434.1	+	2213	773	XP_021775278.1|1.9e-69|uncharacterized protein LOC110739130 [Chenopodium quinoa]
LOC110739129	XM_021919585.1	Known_gene	1	261271	266497	NW_018743434.1	+	5227	1710	XP_021775277.1|2.4e-285|LOW QUALITY PROTEIN: probable glucan 1,3-beta-glucosidase A [Chenopodium quinoa]
LOC110739128	XM_021919583.1	Known_gene	1	248245	251308	NW_018743434.1	+	3064	1879	XP_021743448.1|7.5e-309|probable glucan 1,3-beta-glucosidase A [Chenopodium quinoa]
LOC110739126	XM_021919582.1	Known_gene	1	220539	222275	NW_018743434.1	-	1737	894	XP_021775274.1|1.6e-88|major pollen allergen Lol p 11-like [Chenopodium quinoa]
LOC110739125	XM_021919584.1,XM_021919601.1,XM_021919607.1,XM_021919592.1,BGI_novel_T000559	Known_gene	5	1293293	1302084	NW_018742244.1	+	8792	2369	XP_021775284.1|0.0e+00|splicing factor U2af large subunit A-like isoform X2 [Chenopodium quinoa]
LOC110739124	BGI_novel_T005618,XM_021919581.1,BGI_novel_T005619,BGI_novel_T005616,BGI_novel_T005617,XM_021919580.1,BGI_novel_T005615	Known_gene	7	193279	198859	NW_018743434.1	-	5581	4502	XP_021856887.1|7.1e-235|uncharacterized WD repeat-containing protein C2A9.03-like isoform X1 [Spinacia oleracea]
LOC110739123	XM_021919577.1,XM_021919578.1,XM_021919579.1	Known_gene	3	174989	179125	NW_018743434.1	+	4137	2211	XP_021775269.1|6.1e-190|F-box/FBD/LRR-repeat protein At5g56420-like [Chenopodium quinoa]
LOC110739122	XM_021919576.1	Known_gene	1	170960	173698	NW_018743434.1	+	2739	940	XP_021775268.1|1.9e-58|signal peptidase complex-like protein DTM1 [Chenopodium quinoa]
LOC110739120	BGI_novel_T005614,XM_021919575.1,XM_021919572.1,XM_021919574.1	Known_gene	4	162724	168048	NW_018743434.1	+	5325	2236	XP_021775266.1|1.4e-233|uncharacterized protein LOC110739120 isoform X2 [Chenopodium quinoa]
LOC110739117	XM_021919571.1	Known_gene	1	132220	133009	NW_018743434.1	-	790	790	XP_021775263.1|3.3e-80|uncharacterized protein LOC110739117 [Chenopodium quinoa]
LOC110739116	XM_021919573.1	Known_gene	1	1303832	1311482	NW_018742244.1	+	7651	4387	XP_021775265.1|0.0e+00|probable ubiquitin-conjugating enzyme E2 23 [Chenopodium quinoa]
LOC110739115	XM_021919570.1	Known_gene	1	120772	126359	NW_018743434.1	-	5588	974	XP_021775262.1|2.5e-90|monothiol glutaredoxin-S15, mitochondrial-like [Chenopodium quinoa]
LOC110739113	XM_021919568.1,BGI_novel_T005612,XM_021919567.1,BGI_novel_T005611,XM_021919569.1	Known_gene	5	102364	108651	NW_018743434.1	-	6288	2343	XP_021775261.1|9.6e-277|carbon catabolite repressor protein 4 homolog 1-like isoform X3 [Chenopodium quinoa]
LOC110739112	XM_021919566.1	Known_gene	1	90897	91965	NW_018743434.1	+	1069	912	XP_021775258.1|5.7e-137|uncharacterized protein LOC110739112 [Chenopodium quinoa]
LOC110739111	XM_021919564.1	Known_gene	1	93328	101934	NW_018743434.1	-	8607	2537	XP_021775256.1|0.0e+00|carbon catabolite repressor protein 4 homolog 1-like [Chenopodium quinoa]
LOC110739110	XM_021919565.1	Known_gene	1	1289188	1291660	NW_018742244.1	-	2473	944	XP_021775257.1|4.0e-77|trafficking protein particle complex subunit 2-like protein [Chenopodium quinoa]
LOC110739109	XM_021919562.1,XM_021919561.1,XM_021919563.1,XM_021919560.1	Known_gene	4	17992	20565	NW_018743434.1	-	2574	1575	XP_021775252.1|1.2e-67|carbon catabolite repressor protein 4 homolog 1-like isoform X1 [Chenopodium quinoa]
LOC110739108	XM_021919559.1	Known_gene	1	555290	556738	NW_018743434.1	+	1449	1281	XP_021775251.1|4.3e-98|uncharacterized protein LOC110739108 [Chenopodium quinoa]
LOC110739107	XM_021919558.1	Known_gene	1	540386	541781	NW_018743434.1	-	1396	803	XP_021775250.1|4.5e-85|uncharacterized protein LOC110739107 [Chenopodium quinoa]
LOC110739106	XM_021919557.1	Known_gene	1	538347	540137	NW_018743434.1	+	1791	1251	XP_021775249.1|4.1e-218|GDSL esterase/lipase At1g71250 [Chenopodium quinoa]
LOC110739103	XM_021919556.1	Known_gene	1	6533	7376	NW_018743434.1	+	844	685	XP_021775248.1|1.1e-63|uncharacterized protein LOC110739103 [Chenopodium quinoa]
LOC110739102	XM_021919554.1	Known_gene	1	546727	548279	NW_018743434.1	-	1553	1470	XP_021775246.1|7.7e-293|protein MAIN-LIKE 1-like [Chenopodium quinoa]
LOC110739101	XM_021919553.1	Known_gene	1	542897	544502	NW_018743434.1	+	1606	684	XP_021775245.1|1.7e-130|uncharacterized protein LOC110739101 [Chenopodium quinoa]
LOC110739100	BGI_novel_T000558,XM_021919555.1	Known_gene	2	1286456	1289009	NW_018742244.1	+	2554	1445	XP_021753040.1|6.8e-185|uncharacterized protein LOC110718509 [Chenopodium quinoa]
LOC110739099	XM_021919552.1	Known_gene	1	445487	446158	NW_018743434.1	+	672	672	XP_021775244.1|2.3e-127|uncharacterized protein LOC110739099 [Chenopodium quinoa]
LOC110739098	XM_021919551.1	Known_gene	1	439201	440697	NW_018743434.1	-	1497	1107	XP_021775243.1|4.0e-217|uncharacterized protein LOC110739098 [Chenopodium quinoa]
LOC110739097	XM_021919550.1	Known_gene	1	412306	415488	NW_018743434.1	-	3183	810	XP_021775242.1|3.3e-144|centrosomal protein of 128 kDa-like [Chenopodium quinoa]
LOC110739096	XM_021919549.1	Known_gene	1	182608	184080	NW_018743434.1	-	1473	1089	XP_021775241.1|9.6e-216|uncharacterized protein LOC110739096 [Chenopodium quinoa]
LOC110739095	XM_021919548.1	Known_gene	1	142310	143766	NW_018743434.1	+	1457	1369	XP_021775240.1|4.0e-211|uncharacterized protein LOC110739095 [Chenopodium quinoa]
LOC110739094	XM_021919547.1	Known_gene	1	141221	142306	NW_018743434.1	+	1086	984	XP_021775239.1|6.9e-189|uncharacterized protein LOC110739094 [Chenopodium quinoa]
LOC110739090	XM_021919546.1	Known_gene	1	1280115	1282444	NW_018742244.1	+	2330	1479	XP_021775238.1|1.6e-237|uncharacterized protein LOC110739090 [Chenopodium quinoa]
LOC110739089	XM_021919545.1	Known_gene	1	64406	71478	NW_018743433.1	+	7073	1839	XP_021775237.1|0.0e+00|uncharacterized protein LOC110739089 [Chenopodium quinoa]
LOC110739088	XM_021919544.1	Known_gene	1	584471	598597	NW_018743433.1	-	14127	3107	XP_021775236.1|0.0e+00|uncharacterized protein LOC110739088 [Chenopodium quinoa]
LOC110739087	XM_021919543.1,BGI_novel_T005609,XM_021919541.1,XM_021919542.1	Known_gene	4	394722	399746	NW_018743433.1	+	5025	2067	XP_021775234.1|1.2e-81|external alternative NAD(P)H-ubiquinone oxidoreductase B3, mitochondrial-like isoform X2 [Chenopodium quinoa]
LOC110739086	XM_021919539.1,XM_021919540.1,XM_021919538.1	Known_gene	3	346738	371053	NW_018743433.1	-	24316	2606	XP_021775230.1|4.1e-204|uncharacterized protein LOC110739086 isoform X1 [Chenopodium quinoa]
LOC110739085	XM_021919537.1	Known_gene	1	632471	634064	NW_018743433.1	-	1594	687	XP_021775229.1|1.9e-124|brain acid soluble protein 1-like [Chenopodium quinoa]
LOC110739084	XM_021919535.1	Known_gene	1	222503	223486	NW_018743433.1	-	984	807	XP_021775227.1|4.0e-158|uncharacterized protein LOC110739084 [Chenopodium quinoa]
LOC110739083	XM_021919536.1	Known_gene	1	1282554	1285467	NW_018742244.1	+	2914	2086	XP_021775228.1|4.1e-239|uncharacterized protein LOC110739083 [Chenopodium quinoa]
LOC110739082	XM_021919532.1	Known_gene	1	72358	75295	NW_018743433.1	+	2938	1908	XP_021775224.1|0.0e+00|uncharacterized protein LOC110739082 [Chenopodium quinoa]
LOC110739080	XM_021919534.1,BGI_novel_T000556	Known_gene	2	1266800	1276781	NW_018742244.1	+	9982	3690	XP_021775226.1|0.0e+00|RNA-binding protein 39-like [Chenopodium quinoa]
LOC110739078	XM_021919531.1	Known_gene	1	49999	51410	NW_018743431.1	-	1412	1302	XP_021775223.1|1.3e-174|ethylene-responsive transcription factor ERF071-like [Chenopodium quinoa]
LOC110739077	XM_021919530.1	Known_gene	1	8767	10816	NW_018744884.1	+	2050	986	XP_021722287.1|1.3e-115|60S ribosomal protein L19-3-like [Chenopodium quinoa]
LOC110739076	XM_021919529.1	Known_gene	1	26094	36068	NW_018743431.1	+	9975	2360	XP_021775221.1|0.0e+00|probable ethylene response sensor 1 [Chenopodium quinoa]
LOC110739075	XM_021919528.1	Known_gene	1	9299	19056	NW_018743431.1	+	9758	1911	XP_021775220.1|2.2e-191|replication factor C subunit 2-like [Chenopodium quinoa]
LOC110739074	XM_021919526.1	Known_gene	1	66173	67004	NW_018743431.1	+	832	609	XP_021775218.1|5.9e-114|proline-rich protein 1-like [Chenopodium quinoa]
LOC110739073	XM_021919525.1	Known_gene	1	42636	44848	NW_018743431.1	-	2213	2115	XP_021775217.1|0.0e+00|subtilisin-like protease SBT1.5 [Chenopodium quinoa]
LOC110739072	XM_021919527.1	Known_gene	1	1257295	1263189	NW_018742244.1	+	5895	2248	XP_021775219.1|0.0e+00|translation initiation factor IF3-1, mitochondrial-like [Chenopodium quinoa]
LOC110739071	XM_021919522.1,XM_021919521.1,XM_021919523.1,XM_021919524.1	Known_gene	4	1580	7503	NW_018743429.1	-	5924	2416	XP_021775213.1|0.0e+00|protein NRT1/ PTR FAMILY 8.1-like [Chenopodium quinoa]
LOC110739068	XM_021919520.1	Known_gene	1	6840	7481	NW_018743421.1	+	642	642	XP_021725375.1|2.6e-67|uncharacterized protein At5g64816 [Chenopodium quinoa]
LOC110739067	XM_021919519.1	Known_gene	1	7657	9761	NW_018743421.1	-	2105	2105	XP_021725649.1|8.2e-296|probable serine/threonine-protein kinase WNK11 [Chenopodium quinoa]
LOC110739066	XM_021919518.1	Known_gene	1	2446	6900	NW_018743421.1	+	4455	558	XP_021721442.1|4.7e-41|LRR receptor-like serine/threonine-protein kinase ERL1 [Chenopodium quinoa]
LOC110739063	XM_021919516.1	Known_gene	1	17387	18281	NW_018743415.1	+	895	895	XP_021723157.1|1.8e-106|uncharacterized protein LOC110690616 [Chenopodium quinoa]
LOC110739062	XM_021919515.1	Known_gene	1	11031	11710	NW_018745219.1	+	680	516	XP_021745137.1|6.8e-95|zinc finger BED domain-containing protein RICESLEEPER 2-like [Chenopodium quinoa]
LOC110739061	XM_021919514.1	Known_gene	1	12918	14863	NW_018743414.1	+	1946	636	XP_021775206.1|3.4e-120|uncharacterized protein LOC110739061 [Chenopodium quinoa]
LOC110739059	XM_021919513.1	Known_gene	1	771321	774980	NW_018743412.1	+	3660	1103	XP_021775205.1|2.3e-164|myb family transcription factor APL-like [Chenopodium quinoa]
LOC110739058	XM_021919511.1	Known_gene	1	734078	738581	NW_018743412.1	-	4504	2022	XP_021775203.1|3.8e-282|aspartic proteinase CDR1-like [Chenopodium quinoa]
LOC110739057	XM_021919510.1,XM_021919509.1	Known_gene	2	405835	441952	NW_018743412.1	+	36118	4320	XP_021775201.1|0.0e+00|protein FORGETTER 1-like isoform X1 [Chenopodium quinoa]
LOC110739056	XM_021919508.1	Known_gene	1	291694	293151	NW_018743412.1	+	1458	1458	XP_021775200.1|5.3e-201|protein SLOW GREEN 1, chloroplastic-like [Chenopodium quinoa]
LOC110739055	XM_021919517.1,BGI_novel_T000555,XM_021919512.1	Known_gene	3	1248232	1250610	NW_018742244.1	-	2379	1911	XP_021775209.1|6.4e-131|annexin D5-like isoform X2 [Chenopodium quinoa]
LOC110739054	XM_021919507.1,XM_021919505.1,XM_021919506.1	Known_gene	3	163189	167616	NW_018743412.1	-	4428	1157	XP_021775198.1|7.0e-68|uncharacterized protein LOC110739054 isoform X2 [Chenopodium quinoa]
LOC110739053	XM_021919533.1	Known_gene	1	17841424	17848731	NW_018742204.1	-	7308	1750	XP_021775225.1|1.8e-296|F-box/FBD/LRR-repeat protein At1g51370-like [Chenopodium quinoa]
LOC110739052	XM_021919504.1	Known_gene	1	13332	17505	NW_018743412.1	-	4174	1723	XP_021739976.1|1.2e-55|solanesyl-diphosphate synthase 1, mitochondrial-like isoform X1 [Chenopodium quinoa]
LOC110739051	XM_021919503.1	Known_gene	1	918727	919831	NW_018743412.1	-	1105	807	XP_021775195.1|2.0e-149|uncharacterized protein LOC110739051 [Chenopodium quinoa]
LOC110739050	XM_021919502.1	Known_gene	1	898101	899205	NW_018743412.1	-	1105	807	XP_021775194.1|1.5e-149|uncharacterized protein LOC110739050 [Chenopodium quinoa]
LOC110739049	XM_021919500.1	Known_gene	1	764821	767547	NW_018743412.1	-	2727	1167	XP_021775192.1|2.5e-217|RNA polymerase II degradation factor 1-like [Chenopodium quinoa]
LOC110739048	XM_021919499.1	Known_gene	1	190936	191328	NW_018743412.1	+	393	393	XP_021775191.1|6.8e-71|uncharacterized protein LOC110739048 [Chenopodium quinoa]
LOC110739047	XM_021919501.1	Known_gene	1	1250793	1254026	NW_018742244.1	-	3234	1240	XP_021775193.1|1.6e-174|annexin D5-like [Chenopodium quinoa]
LOC110739046	XM_021919498.1	Known_gene	1	174079	175133	NW_018743412.1	+	1055	990	XP_021775190.1|5.0e-187|uncharacterized protein LOC110739046 [Chenopodium quinoa]
LOC110739045	XM_021919497.1	Known_gene	1	160229	160798	NW_018743412.1	-	570	570	XP_021775189.1|5.4e-109|uncharacterized protein LOC110739045 [Chenopodium quinoa]
LOC110739044	XM_021919496.1,BGI_novel_T005606	Known_gene	2	43562	54511	NW_018743412.1	+	10950	1132	XP_021775188.1|6.2e-157|solanesyl-diphosphate synthase 1, mitochondrial-like [Chenopodium quinoa]
LOC110739040	XM_021919494.1	Known_gene	1	3895136	3898253	NW_018743405.1	-	3118	2118	XP_021765790.1|0.0e+00|protein FAR1-RELATED SEQUENCE 5-like [Chenopodium quinoa]
LOC110739039	XM_021919493.1	Known_gene	1	3885362	3887747	NW_018743405.1	+	2386	702	XP_021775185.1|3.2e-127|uncharacterized protein LOC110739039 [Chenopodium quinoa]
LOC110739038	XM_021919492.1	Known_gene	1	3853609	3866949	NW_018743405.1	-	13341	4102	XP_021775184.1|0.0e+00|WD repeat-containing protein 87-like [Chenopodium quinoa]
LOC110739037	XM_021919491.1	Known_gene	1	3852523	3853874	NW_018743405.1	-	1352	696	XP_021775183.1|4.2e-116|uncharacterized protein LOC110739037 [Chenopodium quinoa]
LOC110739036	XM_021919490.1	Known_gene	1	3847654	3850075	NW_018743405.1	+	2422	1572	XP_021775182.1|0.0e+00|protein FAR1-RELATED SEQUENCE 5-like [Chenopodium quinoa]
LOC110739035	XM_021919489.1	Known_gene	1	3469788	3471371	NW_018743405.1	+	1584	1584	XP_021775181.1|3.4e-310|uncharacterized protein LOC110739035 [Chenopodium quinoa]
LOC110739034	XM_021919487.1	Known_gene	1	3083858	3084962	NW_018743405.1	+	1105	1014	XP_021775179.1|4.5e-199|zinc finger MYM-type protein 1-like [Chenopodium quinoa]
LOC110739033	XM_021919486.1	Known_gene	1	2883854	2884467	NW_018743405.1	-	614	558	XP_021775178.1|5.6e-103|uncharacterized protein LOC110739033 [Chenopodium quinoa]
LOC110739032	XM_021919488.1,XM_021919495.1	Known_gene	2	1225571	1231853	NW_018742244.1	-	6283	2666	XP_021853370.1|6.6e-210|probable protein phosphatase 2C 60 [Spinacia oleracea]
LOC110739031	XM_021919485.1	Known_gene	1	2527548	2528180	NW_018743405.1	-	633	633	XP_021775177.1|4.4e-120|protein MAIN-LIKE 1-like [Chenopodium quinoa]
LOC110739030	XM_021919484.1	Known_gene	1	2524783	2526630	NW_018743405.1	+	1848	1668	XP_021775176.1|0.0e+00|uncharacterized protein LOC110739030 [Chenopodium quinoa]
LOC110739029	XM_021919483.1	Known_gene	1	2444563	2447099	NW_018743405.1	+	2537	1842	XP_021775175.1|0.0e+00|uncharacterized protein LOC110739029 [Chenopodium quinoa]
LOC110739028	XM_021919482.1	Known_gene	1	2187446	2189443	NW_018743405.1	+	1998	1851	XP_021775174.1|0.0e+00|uncharacterized protein LOC110739028 [Chenopodium quinoa]
LOC110739027	XM_021919481.1	Known_gene	1	2123817	2124365	NW_018743405.1	-	549	549	XP_021775173.1|1.8e-101|uncharacterized protein LOC110739027 [Chenopodium quinoa]
LOC110739026	XM_021919480.1	Known_gene	1	2109394	2109981	NW_018743405.1	-	588	588	XP_021775172.1|2.8e-105|uncharacterized protein LOC110739026 [Chenopodium quinoa]
LOC110739024	XM_021919479.1	Known_gene	1	1818850	1819389	NW_018743405.1	-	540	540	XP_021775171.1|9.3e-95|uncharacterized protein LOC110739024 [Chenopodium quinoa]
LOC110739023	XM_021919478.1	Known_gene	1	1626213	1629797	NW_018743405.1	+	3585	2807	XP_021775170.1|0.0e+00|uncharacterized protein LOC110739023 [Chenopodium quinoa]
LOC110739022	XM_021919477.1	Known_gene	1	1498387	1500311	NW_018743405.1	-	1925	804	XP_021775169.1|6.3e-156|uncharacterized protein LOC110739022 [Chenopodium quinoa]
LOC110739021	XM_021919476.1	Known_gene	1	1480599	1481213	NW_018743405.1	-	615	615	XP_021775168.1|6.2e-111|uncharacterized protein LOC110739021 [Chenopodium quinoa]
LOC110739020	XM_021919474.1	Known_gene	1	1241628	1243025	NW_018743405.1	-	1398	1152	XP_021775166.1|1.0e-228|uncharacterized protein LOC110739020 [Chenopodium quinoa]
LOC110739019	XM_021919473.1	Known_gene	1	1182441	1183499	NW_018743405.1	+	1059	1059	XP_021775165.1|2.2e-204|uncharacterized protein LOC110739019 [Chenopodium quinoa]
LOC110739018	XM_021919475.1	Known_gene	1	1212789	1217658	NW_018742244.1	-	4870	4265	XP_021775167.1|0.0e+00|uncharacterized protein LOC110739018 [Chenopodium quinoa]
LOC110739017	XM_021919472.1	Known_gene	1	1030309	1032031	NW_018743405.1	-	1723	1074	XP_021775164.1|4.7e-199|uncharacterized protein LOC110739017 [Chenopodium quinoa]
LOC110739016	XM_021919471.1	Known_gene	1	788930	789645	NW_018743405.1	+	716	501	XP_021775163.1|7.3e-94|protein FAR1-RELATED SEQUENCE 5-like [Chenopodium quinoa]
LOC110739015	XM_021919470.1	Known_gene	1	521790	522651	NW_018743405.1	-	862	618	XP_021775162.1|4.9e-116|uncharacterized protein LOC110739015 [Chenopodium quinoa]
LOC110739014	XM_021919469.1	Known_gene	1	355403	357262	NW_018743405.1	+	1860	927	XP_021732314.1|1.3e-120|uncharacterized protein LOC110699131 [Chenopodium quinoa]
LOC110739013	XM_021919466.1,XM_021919467.1	Known_gene	2	5694149	5703439	NW_018743405.1	-	9291	858	XP_021775159.1|1.9e-65|uncharacterized protein LOC110739013 isoform X2 [Chenopodium quinoa]
LOC110739012	XM_021919465.1,BGI_novel_T005605	Known_gene	2	5687634	5703439	NW_018743405.1	-	15806	1996	XP_021775157.1|5.8e-183|uncharacterized protein LOC110739012 [Chenopodium quinoa]
LOC110739011	XM_021919468.1	Known_gene	1	1208270	1211873	NW_018742244.1	+	3604	1310	XP_021775160.1|8.4e-150|protein CHAPERONE-LIKE PROTEIN OF POR1, chloroplastic-like [Chenopodium quinoa]
LOC110739010	XM_021919464.1	Known_gene	1	5666194	5669809	NW_018743405.1	-	3616	3268	XP_021763148.1|6.5e-199|zinc finger MYM-type protein 1-like [Chenopodium quinoa]
LOC110739009	XM_021919463.1	Known_gene	1	5509026	5515178	NW_018743405.1	-	6153	1033	XP_021775155.1|8.3e-100|ADP-ribosylation factor-like protein 8c [Chenopodium quinoa]
LOC110739008	XM_021919462.1	Known_gene	1	5490062	5494036	NW_018743405.1	+	3975	2979	XP_021775154.1|0.0e+00|probable inactive receptor kinase At3g02880 [Chenopodium quinoa]
LOC110739006	XM_021919461.1	Known_gene	1	5327199	5333718	NW_018743405.1	+	6520	1470	XP_021775153.1|6.7e-175|nuclear speckle splicing regulatory protein 1-like [Chenopodium quinoa]
LOC110739005	XM_021919460.1	Known_gene	1	5280732	5292065	NW_018743405.1	+	11334	4873	XP_021775152.1|0.0e+00|condensin complex subunit 3-like [Chenopodium quinoa]
LOC110739004	XM_021919457.1,XM_021919459.1	Known_gene	2	5172170	5175273	NW_018743405.1	+	3104	2586	XP_021775149.1|4.5e-98|uncharacterized protein LOC110739004 [Chenopodium quinoa]
LOC110739003	XM_021919456.1	Known_gene	1	5152761	5154862	NW_018743405.1	-	2102	2102	XP_021775148.1|8.7e-306|protein SLOW WALKER 1-like [Chenopodium quinoa]
LOC110739002	XM_021919455.1	Known_gene	1	5023125	5049917	NW_018743405.1	-	26793	2487	XP_021775147.1|0.0e+00|dihydrolipoyllysine-residue acetyltransferase component 1 of pyruvate dehydrogenase complex, mitochondrial-like [Chenopodium quinoa]
LOC110739001	XM_021919458.1,BGI_novel_T000554	Known_gene	2	1202187	1207173	NW_018742244.1	-	4987	2561	XP_021775150.1|0.0e+00|uncharacterized protein LOC110739001 [Chenopodium quinoa]
LOC110739000	XM_021919454.1	Known_gene	1	4877068	4887816	NW_018743405.1	-	10749	1961	XP_021775146.1|2.4e-249|protein ELC-like [Chenopodium quinoa]
LOC110738999	XM_021919451.1,XM_021919452.1,XM_021919453.1	Known_gene	3	4684910	4690617	NW_018743405.1	-	5708	1653	XP_021734320.1|2.6e-180|mitochondrial proton/calcium exchanger protein-like [Chenopodium quinoa]
LOC110738998	XM_021919450.1	Known_gene	1	4617290	4625239	NW_018743405.1	-	7950	2700	XP_021754957.1|0.0e+00|NADH dehydrogenase [ubiquinone] iron-sulfur protein 1, mitochondrial-like [Chenopodium quinoa]
LOC110738997	XM_021919447.1,XM_021919449.1,XM_021919448.1	Known_gene	3	4612748	4616550	NW_018743405.1	+	3803	3564	XP_021775139.1|0.0e+00|putative pentatricopeptide repeat-containing protein At1g09680 [Chenopodium quinoa]
LOC110738995	XM_021919444.1	Known_gene	1	4498962	4523194	NW_018743405.1	+	24233	2810	XP_021775136.1|0.0e+00|probable inactive serine/threonine-protein kinase scy1 [Chenopodium quinoa]
LOC110738994	XM_021919443.1	Known_gene	1	3950964	3958034	NW_018743405.1	-	7071	1762	XP_021775135.1|8.4e-278|uridine kinase-like protein 1, chloroplastic [Chenopodium quinoa]
LOC110738993	XM_021919442.1,XM_021919441.1	Known_gene	2	15907	3852543	NW_018743405.1	*	3836637	467	XP_021728181.1|1.7e-65|uncharacterized protein LOC110695241 isoform X1 [Chenopodium quinoa]
LOC110738992	XM_021919440.1	Known_gene	1	3888211	3889148	NW_018743405.1	+	938	641	XP_021775132.1|8.2e-90|uncharacterized protein LOC110738992 [Chenopodium quinoa]
LOC110738991	XM_021919438.1	Known_gene	1	1325480	1326960	NW_018743669.1	+	1481	918	XP_021715554.1|2.6e-166|protein FAR1-RELATED SEQUENCE 7-like isoform X4 [Chenopodium quinoa]
LOC110738990	XM_021919434.1,XM_021919436.1,BGI_novel_T005603,BGI_novel_T005602,BGI_novel_T005601,XM_021919435.1,XM_021919437.1,XM_021919433.1	Known_gene	8	3871810	3884329	NW_018743405.1	+	12520	1933	XP_021775125.1|1.6e-258|exosome complex component RRP45A-like isoform X1 [Chenopodium quinoa]
LOC110738989	XM_021919431.1,XM_021919432.1	Known_gene	2	3689455	3699845	NW_018743405.1	-	10391	3980	XP_021775123.1|0.0e+00|uncharacterized protein LOC110738989 [Chenopodium quinoa]
LOC110738988	XM_021919429.1,XM_021919428.1	Known_gene	2	3685412	3688062	NW_018743405.1	-	2651	1561	XP_021775120.1|8.1e-200|uncharacterized protein LOC110738988 isoform X1 [Chenopodium quinoa]
LOC110738987	XM_021919427.1	Known_gene	1	3462931	3469166	NW_018743405.1	-	6236	1680	XP_021775119.1|1.5e-239|isocitrate dehydrogenase [NADP] [Chenopodium quinoa]
LOC110738986	XM_021919426.1,BGI_novel_T005600	Known_gene	2	3372256	3376870	NW_018743405.1	+	4615	1181	XP_021775118.1|5.3e-127|uncharacterized protein LOC110738986 [Chenopodium quinoa]
LOC110738985	XM_021919425.1	Known_gene	1	3216097	3238516	NW_018743405.1	-	22420	3133	XP_021775117.1|0.0e+00|peptidyl serine alpha-galactosyltransferase-like [Chenopodium quinoa]
LOC110738984	XM_021919424.1	Known_gene	1	3204057	3213936	NW_018743405.1	+	9880	1937	XP_021775116.1|3.2e-270|dolichyl-diphosphooligosaccharide--protein glycosyltransferase subunit 1B-like [Chenopodium quinoa]
LOC110738982	BGI_novel_T000552,XM_021919439.1,BGI_novel_T000553,XM_021919423.1,XM_021919430.1,XM_021919446.1	Known_gene	6	1196503	1201665	NW_018742244.1	+	5163	2553	XP_021753028.1|1.6e-253|uncharacterized protein LOC110718500 isoform X2 [Chenopodium quinoa]
LOC110738981	XM_021919422.1,XM_021919421.1	Known_gene	2	2980327	2985104	NW_018743405.1	+	4778	2099	XP_021775113.1|2.8e-280|protein WVD2-like 7 isoform X1 [Chenopodium quinoa]
LOC110738980	XM_021919420.1	Known_gene	1	2596940	2608928	NW_018743405.1	+	11989	2291	XP_021775112.1|3.4e-154|cystinosin homolog [Chenopodium quinoa]
LOC110738978	XM_021919419.1	Known_gene	1	2419034	2422345	NW_018743405.1	+	3312	2652	XP_021775111.1|0.0e+00|auxin response factor 18-like [Chenopodium quinoa]
LOC110738977	XM_021919418.1	Known_gene	1	2339971	2346455	NW_018743405.1	+	6485	1394	XP_021775110.1|1.8e-166|uncharacterized protein LOC110738977 [Chenopodium quinoa]
LOC110738976	XM_021919417.1	Known_gene	1	2326867	2338499	NW_018743405.1	+	11633	1613	XP_021775109.1|4.9e-184|mRNA-decapping enzyme subunit 2-like [Chenopodium quinoa]
LOC110738975	BGI_novel_T005598,XM_021919415.1	Known_gene	2	2260277	2264675	NW_018743405.1	-	4399	989	XP_021775107.1|1.7e-139|chlorophyll a-b binding protein 6A, chloroplastic [Chenopodium quinoa]
LOC110738974	XM_021919414.1	Known_gene	1	2265539	2274324	NW_018743405.1	-	8786	2057	XP_010693397.1|2.0e-262|PREDICTED: probable mitochondrial-processing peptidase subunit beta, mitochondrial [Beta vulgaris subsp. vulgaris]
LOC110738973	XM_021919413.1,BGI_novel_T005597	Known_gene	2	2193736	2207385	NW_018743405.1	+	13650	2311	XP_021775105.1|3.4e-303|protoporphyrinogen oxidase, chloroplastic/mitochondrial-like [Chenopodium quinoa]
LOC110738972	XM_021919416.1,BGI_novel_T000551	Known_gene	2	1192548	1195259	NW_018742244.1	-	2712	991	XP_021775108.1|3.0e-67|INO80 complex subunit C-like [Chenopodium quinoa]
LOC110738971	XM_021919445.1	Known_gene	1	17836843	17838844	NW_018742204.1	-	2002	996	XP_021775137.1|2.1e-193|F-box/FBD/LRR-repeat protein At1g13570-like [Chenopodium quinoa]
LOC110738970	XM_021919412.1	Known_gene	1	2023907	2027420	NW_018743405.1	-	3514	1738	XP_021747497.1|9.6e-117|proteasome subunit beta type-2-A-like [Chenopodium quinoa]
LOC110738969	XM_021919410.1,XM_021919411.1	Known_gene	2	1952254	1971821	NW_018743405.1	-	19568	3363	XP_021754949.1|0.0e+00|potassium channel SKOR-like [Chenopodium quinoa]
LOC110738965	XM_021919409.1	Known_gene	1	1506504	1524142	NW_018743405.1	-	17639	5023	XP_021775101.1|0.0e+00|uncharacterized protein LOC110738965 [Chenopodium quinoa]
LOC110738964	XM_021919407.1,XM_021919406.1,BGI_novel_T005593	Known_gene	3	1446306	1449981	NW_018743405.1	+	3676	3594	XP_021775098.1|3.7e-171|uncharacterized protein LOC110738964 [Chenopodium quinoa]
LOC110738963	XM_021919405.1,BGI_novel_T005592	Known_gene	2	988754	992982	NW_018743405.1	+	4229	1432	XP_021775097.1|1.3e-143|uncharacterized protein LOC110738963 [Chenopodium quinoa]
LOC110738962	XM_021919404.1	Known_gene	1	781022	787150	NW_018743405.1	-	6129	961	XP_021775096.1|3.3e-95|probable NADH dehydrogenase [ubiquinone] 1 alpha subcomplex subunit 5, mitochondrial [Chenopodium quinoa]
LOC110738961	XM_021919408.1	Known_gene	1	1188056	1191153	NW_018742244.1	-	3098	1525	XP_021775100.1|9.8e-158|pre-mRNA-splicing factor cwf23-like [Chenopodium quinoa]
LOC110738958	XM_021919403.1	Known_gene	1	236366	244505	NW_018743405.1	-	8140	1150	XP_021775095.1|3.3e-113|COP9 signalosome complex subunit 8-like [Chenopodium quinoa]
LOC110738956	XM_021919402.1	Known_gene	1	5786117	5786713	NW_018743405.1	+	597	597	XP_021775094.1|1.1e-117|uncharacterized protein LOC110738956 [Chenopodium quinoa]
LOC110738955	XM_021919400.1	Known_gene	1	5729412	5730140	NW_018743405.1	+	729	579	XP_021775092.1|8.7e-107|uncharacterized protein LOC110738955 [Chenopodium quinoa]
LOC110738954	XM_021919399.1	Known_gene	1	5666319	5666783	NW_018743405.1	-	465	465	XP_021775091.1|2.5e-80|uncharacterized protein LOC110738954 [Chenopodium quinoa]
LOC110738953	XM_021919401.1	Known_gene	1	1181772	1184079	NW_018742244.1	+	2308	786	XP_021775093.1|2.8e-84|uncharacterized protein LOC110738953 [Chenopodium quinoa]
LOC110738952	XM_021919398.1	Known_gene	1	5664984	5665484	NW_018743405.1	-	501	501	XP_021775090.1|4.2e-89|uncharacterized protein LOC110738952 [Chenopodium quinoa]
LOC110738951	XM_021919397.1	Known_gene	1	5538216	5539528	NW_018743405.1	-	1313	795	XP_021775089.1|4.2e-152|protein FAR1-RELATED SEQUENCE 5-like [Chenopodium quinoa]
LOC110738950	XM_021919396.1	Known_gene	1	5537024	5537563	NW_018743405.1	-	540	540	XP_021775088.1|1.5e-105|protein FAR1-RELATED SEQUENCE 12-like [Chenopodium quinoa]
LOC110738949	XM_021919395.1	Known_gene	1	5484683	5486114	NW_018743405.1	+	1432	978	XP_021775087.1|1.4e-189|uncharacterized protein LOC110738949 [Chenopodium quinoa]
LOC110738948	XM_021919394.1	Known_gene	1	5481373	5482386	NW_018743405.1	-	1014	1014	XP_021775086.1|1.7e-198|protein FAR1-RELATED SEQUENCE 8-like [Chenopodium quinoa]
LOC110738947	XM_021919393.1	Known_gene	1	5115017	5116222	NW_018743405.1	-	1206	1206	XP_021775085.1|1.8e-231|uncharacterized protein LOC110738947 [Chenopodium quinoa]
LOC110738946	XM_021919391.1	Known_gene	1	5084058	5085678	NW_018743405.1	+	1621	1438	XP_021775083.1|4.0e-92|uncharacterized protein LOC110738946 [Chenopodium quinoa]
LOC110738945	XM_021919390.1	Known_gene	1	5017560	5022563	NW_018743405.1	-	5004	2433	XP_021775082.1|0.0e+00|protein FAR1-RELATED SEQUENCE 5-like [Chenopodium quinoa]
LOC110738944	XM_021919392.1	Known_gene	1	1178418	1179656	NW_018742244.1	-	1239	1239	XP_021775084.1|2.2e-184|stress-response A/B barrel domain-containing protein UP3-like [Chenopodium quinoa]
LOC110738942	XM_021919389.1	Known_gene	1	4494101	4496013	NW_018743405.1	+	1913	1817	XP_021775081.1|0.0e+00|protein FAR1-RELATED SEQUENCE 6-like [Chenopodium quinoa]
LOC110738941	XM_021919388.1	Known_gene	1	4429369	4430124	NW_018743405.1	-	756	756	XP_021775080.1|4.3e-146|uncharacterized protein LOC110738941 [Chenopodium quinoa]
LOC110738940	XM_021919386.1	Known_gene	1	4229291	4230684	NW_018743405.1	+	1394	1311	XP_021775078.1|1.4e-261|uncharacterized protein LOC110738940 [Chenopodium quinoa]
LOC110738939	XM_021919387.1	Known_gene	1	1172172	1174054	NW_018742244.1	+	1883	1008	XP_021775079.1|5.8e-90|uncharacterized protein LOC110738939 [Chenopodium quinoa]
LOC110738938	XM_021919385.1	Known_gene	1	5338641	5340899	NW_018743405.1	+	2259	802	XP_021775077.1|5.8e-77|15.7 kDa heat shock protein, peroxisomal-like [Chenopodium quinoa]
LOC110738928	XM_021919384.1	Known_gene	1	1117641	1120085	NW_018742244.1	+	2445	1173	XP_021775076.1|3.3e-121|uncharacterized protein LOC110738928 [Chenopodium quinoa]
LOC110738926	XM_021919383.1	Known_gene	1	7140	10167	NW_018745252.1	-	3028	1127	XP_021715182.1|6.9e-185|peroxidase 4-like [Chenopodium quinoa]
LOC110738922	XM_021919382.1	Known_gene	1	760264	760728	NW_018743397.1	-	465	465	XP_021775074.1|1.6e-79|uncharacterized protein LOC110738922 [Chenopodium quinoa]
LOC110738921	XM_021919381.1	Known_gene	1	757497	758866	NW_018743397.1	-	1370	918	XP_021775073.1|1.4e-175|uncharacterized protein LOC110738921 [Chenopodium quinoa]
LOC110738920	XM_021919380.1	Known_gene	1	743388	744563	NW_018743397.1	+	1176	1176	XP_021775072.1|5.5e-233|uncharacterized protein LOC110738920 [Chenopodium quinoa]
LOC110738919	XM_021919378.1	Known_gene	1	741558	742775	NW_018743397.1	+	1218	1218	XP_021775070.1|2.4e-247|putative F-box/kelch-repeat protein At1g15680 [Chenopodium quinoa]
LOC110738918	XM_021919377.1	Known_gene	1	728943	731017	NW_018743397.1	+	2075	1152	XP_021775069.1|1.1e-222|probable indole-3-pyruvate monooxygenase YUCCA10 [Chenopodium quinoa]
LOC110738917	XM_021919376.1	Known_gene	1	700832	701140	NW_018743397.1	+	309	309	XP_021775068.1|4.3e-52|transmembrane protein DDB_G0273707/DDB_G0273361-like [Chenopodium quinoa]
LOC110738916	XM_021919379.1	Known_gene	1	1120454	1128655	NW_018742244.1	-	8202	1965	XP_021775071.1|1.8e-241|hippocampus abundant transcript 1 protein-like [Chenopodium quinoa]
LOC110738915	XM_021919375.1,BGI_novel_T005583	Known_gene	2	453318	458758	NW_018743397.1	-	5441	5278	XP_021775067.1|0.0e+00|flocculation protein FLO11-like [Chenopodium quinoa]
LOC110738914	XM_021919374.1	Known_gene	1	433337	433765	NW_018743397.1	+	429	429	XP_021775066.1|2.6e-79|S-protein homolog 1-like [Chenopodium quinoa]
LOC110738913	XM_021919373.1	Known_gene	1	349166	351121	NW_018743397.1	+	1956	1956	XP_021775065.1|0.0e+00|LRR receptor-like serine/threonine-protein kinase GSO1 [Chenopodium quinoa]
LOC110738912	XM_021919372.1	Known_gene	1	348156	349118	NW_018743397.1	+	963	963	XP_021775064.1|3.5e-185|receptor like protein 30-like [Chenopodium quinoa]
LOC110738910	XM_021919371.1	Known_gene	1	268120	269291	NW_018743397.1	+	1172	1041	XP_021775063.1|1.2e-202|uncharacterized protein LOC110738910 [Chenopodium quinoa]
LOC110738909	XM_021919370.1	Known_gene	1	230732	231580	NW_018743397.1	-	849	849	XP_021775062.1|9.0e-153|disease resistance protein RGA2-like [Chenopodium quinoa]
LOC110738908	XM_021919367.1	Known_gene	1	228603	230636	NW_018743397.1	-	2034	2034	XP_021775059.1|0.0e+00|disease resistance protein RGA2-like [Chenopodium quinoa]
LOC110738907	XM_021919366.1	Known_gene	1	126944	128170	NW_018743397.1	-	1227	1128	XP_021775058.1|3.2e-214|glucan endo-1,3-beta-glucosidase-like [Chenopodium quinoa]
LOC110738906	XM_021919365.1	Known_gene	1	48344	51049	NW_018743397.1	+	2706	764	XP_021775057.1|1.9e-141|uncharacterized protein LOC110738906 [Chenopodium quinoa]
LOC110738905	XM_021919364.1	Known_gene	1	751416	754887	NW_018743397.1	-	3472	1944	XP_021775056.1|4.3e-243|uncharacterized protein LOC110738905 [Chenopodium quinoa]
LOC110738904	XM_021919362.1,XM_021919363.1	Known_gene	2	734959	740600	NW_018743397.1	+	5642	4080	XP_021775054.1|3.1e-256|F-box protein At5g49610-like [Chenopodium quinoa]
LOC110738903	XM_021919361.1	Known_gene	1	731586	734281	NW_018743397.1	-	2696	1422	XP_021775053.1|9.7e-168|ribosome-binding factor PSRP1, chloroplastic-like [Chenopodium quinoa]
LOC110738902	XM_021919359.1	Known_gene	1	723250	725483	NW_018743397.1	+	2234	2140	XP_021775051.1|1.3e-285|transcription termination factor MTERF8, chloroplastic-like [Chenopodium quinoa]
LOC110738901	XM_021919358.1	Known_gene	1	718361	722751	NW_018743397.1	+	4391	1508	XP_021775050.1|2.1e-192|uncharacterized protein LOC110738901 [Chenopodium quinoa]
LOC110738900	XM_021919357.1	Known_gene	1	707978	711758	NW_018743397.1	-	3781	2213	XP_021775049.1|8.1e-254|uncharacterized protein LOC110738900 [Chenopodium quinoa]
LOC110738899	XM_021919360.1,XM_021919369.1	Known_gene	2	1064191	1091555	NW_018742244.1	-	27365	2305	XP_021775052.1|1.3e-259|protein DJ-1 homolog C-like [Chenopodium quinoa]
LOC110738898	XM_021919356.1,XM_021919355.1	Known_gene	2	694500	697940	NW_018743397.1	-	3441	2165	XP_021857321.1|1.6e-310|granule-bound starch synthase 1, chloroplastic/amyloplastic-like [Spinacia oleracea]
LOC110738897	XM_021919352.1,XM_021919354.1,XM_021919353.1	Known_gene	3	682981	689950	NW_018743397.1	+	6970	1693	XP_021775044.1|3.5e-140|serine/arginine-rich splicing factor SR34A-like [Chenopodium quinoa]
LOC110738895	XM_021919351.1	Known_gene	1	668545	679209	NW_018743397.1	-	10665	3689	XP_021775043.1|0.0e+00|uncharacterized protein LOC110738895 [Chenopodium quinoa]
LOC110738894	XM_021919349.1,XM_021919350.1	Known_gene	2	654278	660910	NW_018743397.1	-	6633	1668	XP_021775041.1|7.5e-236|polyadenylate-binding protein-interacting protein 11-like [Chenopodium quinoa]
LOC110738893	XM_021919347.1	Known_gene	1	639077	640211	NW_018743397.1	-	1135	1135	XP_021775039.1|7.0e-84|uncharacterized protein LOC110738893 [Chenopodium quinoa]
LOC110738892	XM_021919346.1	Known_gene	1	627801	629477	NW_018743397.1	+	1677	1178	XP_021775038.1|7.4e-129|small heat shock protein, chloroplastic-like [Chenopodium quinoa]
LOC110738891	XM_021919345.1	Known_gene	1	619737	622553	NW_018743397.1	-	2817	1754	XP_021763226.1|1.0e-179|protein IQ-DOMAIN 14-like [Chenopodium quinoa]
LOC110738890	XM_021919344.1	Known_gene	1	616492	619625	NW_018743397.1	+	3134	2081	XP_021775036.1|1.4e-300|growth-regulating factor 7-like [Chenopodium quinoa]
LOC110738889	XM_021919343.1	Known_gene	1	602942	604799	NW_018743397.1	+	1858	1858	XP_021775035.1|7.3e-264|protein GPR107-like [Chenopodium quinoa]
LOC110738888	XM_021919342.1	Known_gene	1	573194	576699	NW_018743397.1	+	3506	644	XP_021775034.1|1.1e-33|uncharacterized protein LOC110738888 [Chenopodium quinoa]
LOC110738887	XM_021919340.1	Known_gene	1	568407	572819	NW_018743397.1	+	4413	1351	XP_021775032.1|1.4e-118|GRF1-interacting factor 2-like [Chenopodium quinoa]
LOC110738886	XM_021919348.1,XM_021919341.1	Known_gene	2	1058526	1063999	NW_018742244.1	+	5474	1976	XP_021775033.1|0.0e+00|DDB1- and CUL4-associated factor 8-like isoform X1 [Chenopodium quinoa]
LOC110738885	XM_021919339.1,XM_021919338.1,XM_021919337.1,XM_021919336.1	Known_gene	4	557307	564343	NW_018743397.1	+	7037	3154	XP_021775029.1|0.0e+00|uncharacterized protein LOC110738885 isoform X2 [Chenopodium quinoa]
LOC110738884	XM_021919334.1,XM_021919335.1	Known_gene	2	546952	553314	NW_018743397.1	-	6363	2581	XP_021858062.1|1.7e-216|CDPK-related kinase 6-like isoform X1 [Spinacia oleracea]
LOC110738883	XM_021919332.1,XM_021919333.1,XM_021919331.1	Known_gene	3	539738	545823	NW_018743397.1	-	6086	3424	XP_021775023.1|0.0e+00|CDPK-related kinase 6-like isoform X1 [Chenopodium quinoa]
LOC110738882	XM_021919330.1	Known_gene	1	533552	534392	NW_018743397.1	+	841	841	XP_021775022.1|8.3e-82|auxin-responsive protein SAUR32-like [Chenopodium quinoa]
LOC110738881	XM_021919329.1	Known_gene	1	505381	507085	NW_018743397.1	+	1705	1330	XP_021775021.1|7.0e-168|syntaxin-related protein KNOLLE-like [Chenopodium quinoa]
LOC110738878	XM_021919328.1	Known_gene	1	475928	477804	NW_018743397.1	+	1877	1609	XP_021775020.1|2.0e-265|uncharacterized protein LOC110738878 [Chenopodium quinoa]
LOC110738876	XM_021919327.1	Known_gene	1	461612	463496	NW_018743397.1	-	1885	1631	XP_021775019.1|4.0e-266|uncharacterized protein LOC110738876 [Chenopodium quinoa]
LOC110738875	BGI_novel_T005582,XM_021919323.1,XM_021919324.1,XM_021919326.1,XM_021919325.1	Known_gene	5	437325	453549	NW_018743397.1	+	16225	1938	XP_021775017.1|3.8e-208|pyridoxal reductase, chloroplastic-like isoform X3 [Chenopodium quinoa]
LOC110738874	XM_021919322.1	Known_gene	1	408780	410015	NW_018743397.1	+	1236	1153	XP_021775014.1|3.0e-135|homeobox-leucine zipper protein ATHB-12-like [Chenopodium quinoa]
LOC110738873	XM_021919321.1	Known_gene	1	393733	396551	NW_018743397.1	+	2819	802	VDC70205.1|9.3e-67|unnamed protein product [Brassica rapa]
LOC110738872	XM_021919320.1	Known_gene	1	388708	392482	NW_018743397.1	-	3775	1225	XP_021775012.1|1.0e-181|probable 6-phosphogluconolactonase 4, chloroplastic [Chenopodium quinoa]
LOC110738871	XM_021919318.1,XM_021919317.1	Known_gene	2	351662	358296	NW_018743397.1	-	6635	2612	XP_021775009.1|0.0e+00|small G protein signaling modulator 2-like isoform X1 [Chenopodium quinoa]
LOC110738870	XM_021919319.1,BGI_novel_T000549	Known_gene	2	1020142	1029769	NW_018742244.1	+	9628	2857	XP_021775011.1|0.0e+00|serine/threonine-protein kinase STY46-like [Chenopodium quinoa]
LOC110738869	XM_021919314.1,XM_021919315.1,XM_021919316.1	Known_gene	3	343857	346691	NW_018743397.1	+	2835	854	XP_021775006.1|3.2e-73|cytochrome b5-like [Chenopodium quinoa]
LOC110738868	XM_021919313.1,XM_021919312.1	Known_gene	2	328818	334377	NW_018743397.1	+	5560	2994	XP_021763493.1|0.0e+00|metal-nicotianamine transporter YSL3-like isoform X1 [Chenopodium quinoa]
LOC110738867	XM_021919311.1	Known_gene	1	323320	328550	NW_018743397.1	+	5231	2852	KNA07123.1|0.0e+00|hypothetical protein SOVF_174830 [Spinacia oleracea]
LOC110738866	XM_021919310.1	Known_gene	1	316222	320671	NW_018743397.1	-	4450	1759	XP_021775002.1|3.3e-218|ATPase family AAA domain-containing protein 1-like [Chenopodium quinoa]
LOC110738865	XM_021919309.1	Known_gene	1	304379	305395	NW_018743397.1	-	1017	890	XP_021775001.1|4.8e-80|centromere protein V-like [Chenopodium quinoa]
LOC110738864	XM_021919308.1	Known_gene	1	289307	304243	NW_018743397.1	+	14937	3574	XP_021775000.1|0.0e+00|nuclear pore complex protein NUP98A-like [Chenopodium quinoa]
LOC110738863	XM_021919306.1	Known_gene	1	284003	287020	NW_018743397.1	-	3018	3018	XP_021774998.1|0.0e+00|pentatricopeptide repeat-containing protein At5g08510-like [Chenopodium quinoa]
LOC110738862	XM_021919305.1	Known_gene	1	280648	283896	NW_018743397.1	+	3249	1767	XP_021774997.1|2.1e-273|RNA demethylase ALKBH5-like [Chenopodium quinoa]
LOC110738861	XM_021919304.1	Known_gene	1	271496	274908	NW_018743397.1	+	3413	1353	XP_021774996.1|2.4e-168|uncharacterized protein LOC110738861 [Chenopodium quinoa]
LOC110738860	XM_021919303.1,XM_021919302.1,XM_021919300.1,XM_021919301.1	Known_gene	4	243008	251974	NW_018743397.1	+	8967	1514	XP_021774992.1|3.8e-156|nuclear speckle RNA-binding protein A-like isoform X1 [Chenopodium quinoa]
LOC110738859	XM_021919298.1	Known_gene	1	253157	266347	NW_018743397.1	+	13191	2449	XP_021763627.1|0.0e+00|oligopeptide transporter 6-like [Chenopodium quinoa]
LOC110738858	XM_021919297.1	Known_gene	1	237054	238437	NW_018743397.1	-	1384	796	XP_021774989.1|3.9e-57|protein yippee-like At4g27745 [Chenopodium quinoa]
LOC110738856	XM_021919296.1	Known_gene	1	233609	235401	NW_018743397.1	+	1793	1369	XP_021774988.1|1.4e-248|disease resistance protein RGA2-like [Chenopodium quinoa]
LOC110738855	XM_021919295.1	Known_gene	1	218944	221865	NW_018743397.1	-	2922	1409	XP_021774987.1|1.7e-87|uncharacterized protein LOC110738855 [Chenopodium quinoa]
LOC110738854	XM_021919294.1	Known_gene	1	212971	218388	NW_018743397.1	+	5418	2234	XP_021774986.1|3.7e-262|molybdate-anion transporter-like [Chenopodium quinoa]
LOC110738853	XM_021919293.1	Known_gene	1	209603	211922	NW_018743397.1	-	2320	1082	XP_021774985.1|6.1e-130|rhodanese-like domain-containing protein 14, chloroplastic [Chenopodium quinoa]
LOC110738852	BGI_novel_T005580,XM_021919291.1	Known_gene	2	199197	209404	NW_018743397.1	+	10208	1587	XP_021774983.1|1.5e-217|UPF0160 protein-like [Chenopodium quinoa]
LOC110738851	XM_021919290.1	Known_gene	1	197126	198790	NW_018743397.1	+	1665	1665	XP_021774982.1|1.0e-277|AAA-ATPase At2g46620-like [Chenopodium quinoa]
LOC110738850	BGI_novel_T005579,XM_021919289.1	Known_gene	2	189473	196197	NW_018743397.1	+	6725	2282	XP_021774981.1|0.0e+00|uncharacterized protein LOC110738850 [Chenopodium quinoa]
LOC110738849	XM_021919307.1,XM_021919292.1,XM_021919299.1	Known_gene	3	1036247	1053294	NW_018742244.1	+	17048	9438	XP_021774984.1|0.0e+00|serine/threonine-protein kinase ATR-like [Chenopodium quinoa]
LOC110738848	XM_021919288.1	Known_gene	1	177280	179528	NW_018743397.1	-	2249	792	XP_021774980.1|7.7e-98|histone-lysine N-methyltransferase ATXR6-like [Chenopodium quinoa]
LOC110738847	XM_021919286.1,XM_021919287.1	Known_gene	2	183273	188127	NW_018743397.1	-	4855	2224	XP_021774978.1|2.2e-267|histone-lysine N-methyltransferase ATXR6-like [Chenopodium quinoa]
LOC110738846	XM_021919285.1	Known_gene	1	179820	183061	NW_018743397.1	-	3242	3139	XP_021774977.1|0.0e+00|putative disease resistance protein At3g14460 [Chenopodium quinoa]
LOC110738845	XM_021919284.1	Known_gene	1	149543	154730	NW_018743397.1	-	5188	3741	XP_021774976.1|0.0e+00|WD repeat-containing protein 44-like [Chenopodium quinoa]
LOC110738844	XM_021919282.1,XM_021919283.1	Known_gene	2	136287	138608	NW_018743397.1	-	2322	2322	XP_021774974.1|1.0e-101|DPH4 homolog isoform X1 [Chenopodium quinoa]
LOC110738843	BGI_novel_T005576,BGI_novel_T005577,XM_021919280.1,BGI_novel_T005578	Known_gene	4	132801	142116	NW_018743397.1	-	9316	5507	XP_021774972.1|1.5e-128|thylakoid lumenal 17.4 kDa protein, chloroplastic-like [Chenopodium quinoa]
LOC110738841	XM_021919279.1	Known_gene	1	119993	124724	NW_018743397.1	-	4732	1953	XP_021774971.1|1.8e-220|acyl-CoA-binding domain-containing protein 1-like [Chenopodium quinoa]
LOC110738840	XM_021919281.1	Known_gene	1	148520	150190	NW_018744062.1	+	1671	1194	XP_021725243.1|7.3e-193|uncharacterized protein LOC110692516 [Chenopodium quinoa]
LOC110738839	XM_021919278.1	Known_gene	1	114940	119053	NW_018743397.1	+	4114	2592	XP_021843141.1|0.0e+00|luminal-binding protein [Spinacia oleracea]
LOC110738838	XM_021919277.1,BGI_novel_T005575,XM_021919276.1	Known_gene	3	92036	111193	NW_018743397.1	-	19158	6868	XP_021774968.1|0.0e+00|separase-like isoform X1 [Chenopodium quinoa]
LOC110738837	XM_021919275.1	Known_gene	1	82120	86984	NW_018743397.1	-	4865	3601	XP_021774967.1|0.0e+00|importin subunit beta-1-like [Chenopodium quinoa]
LOC110738836	XM_021919273.1,XM_021919274.1	Known_gene	2	70725	74628	NW_018743397.1	+	3904	1517	XP_021774965.1|6.9e-220|protein phosphatase 2C 57-like isoform X1 [Chenopodium quinoa]
LOC110738835	XM_021919272.1	Known_gene	1	67367	70090	NW_018743397.1	+	2724	945	XP_021774964.1|2.9e-91|protein PLASTID TRANSCRIPTIONALLY ACTIVE 7-like [Chenopodium quinoa]
LOC110738834	XM_021919271.1	Known_gene	1	57845	59569	NW_018743397.1	-	1725	1725	XP_021774963.1|3.9e-235|protein MITOFERRINLIKE 1, chloroplastic-like [Chenopodium quinoa]
LOC110738833	XM_021919269.1	Known_gene	1	59873	66320	NW_018743397.1	-	6448	3127	XP_010671413.1|0.0e+00|PREDICTED: KH domain-containing protein At4g18375 isoform X1 [Beta vulgaris subsp. vulgaris]
LOC110738832	XM_021919268.1,XM_021919266.1,XM_021919267.1	Known_gene	3	33098	40390	NW_018743397.1	-	7293	3254	XP_021843131.1|1.8e-272|nephrocystin-3 isoform X1 [Spinacia oleracea]
LOC110738831	XM_021919265.1	Known_gene	1	16373	30847	NW_018743397.1	-	14475	1121	XP_021774957.1|2.1e-109|uncharacterized protein LOC110738831 [Chenopodium quinoa]
LOC110738829	XM_021919264.1	Known_gene	1	366602	367409	NW_018744676.1	+	808	485	XP_021735592.1|4.0e-57|abscisic stress-ripening protein 1-like [Chenopodium quinoa]
LOC110738828	XM_021919262.1	Known_gene	1	756393	757290	NW_018743397.1	-	898	898	XP_021761313.1|5.5e-108|uncharacterized protein LOC110726154 [Chenopodium quinoa]
LOC110738827	XM_021919261.1	Known_gene	1	630108	634363	NW_018743397.1	+	4256	2558	XP_021774953.1|0.0e+00|subtilisin-like protease SBT5.3 [Chenopodium quinoa]
LOC110738826	XM_021919260.1	Known_gene	1	598620	599726	NW_018743397.1	-	1107	1028	XP_021745657.1|2.9e-161|uncharacterized protein LOC110711553 [Chenopodium quinoa]
LOC110738825	XM_021919259.1	Known_gene	1	239250	240208	NW_018743397.1	-	959	512	XP_021774951.1|4.1e-52|protein yippee-like At4g27740 [Chenopodium quinoa]
LOC110738824	XM_021919258.1	Known_gene	1	88923	91916	NW_018743397.1	-	2994	1791	XP_021774950.1|5.3e-211|calumenin [Chenopodium quinoa]
LOC110738823	XM_021919257.1	Known_gene	1	56619	57108	NW_018743397.1	-	490	490	XP_021774949.1|2.5e-70|uncharacterized protein LOC110738823 [Chenopodium quinoa]
LOC110738821	XM_021919254.1	Known_gene	1	2254	4148	NW_018743397.1	-	1895	1078	XP_021774946.1|3.8e-196|LOW QUALITY PROTEIN: dihydroflavonol 4-reductase-like [Chenopodium quinoa]
LOC110738820	XM_021919253.1	Known_gene	1	25228	25551	NW_018743394.1	+	324	324	XP_021774945.1|1.1e-55|uncharacterized protein LOC110738820 [Chenopodium quinoa]
LOC110738812	XM_021919251.1	Known_gene	1	3296363	3297570	NW_018743391.1	+	1208	805	XP_021774943.1|6.9e-86|MLP-like protein 31 [Chenopodium quinoa]
LOC110738811	XM_021919250.1	Known_gene	1	3280966	3282536	NW_018743391.1	+	1571	927	XP_021774942.1|2.0e-84|MLP-like protein 31 [Chenopodium quinoa]
LOC110738810	XM_021919263.1,XM_021919252.1,XM_021919256.1,XM_021919270.1	Known_gene	4	990973	995434	NW_018742244.1	+	4462	3372	XP_021722215.1|0.0e+00|protein FAR1-RELATED SEQUENCE 7-like isoform X4 [Chenopodium quinoa]
LOC110738809	XM_021919249.1	Known_gene	1	3271479	3276376	NW_018743391.1	+	4898	4736	XP_021774941.1|0.0e+00|spliceosome-associated protein 130 A-like [Chenopodium quinoa]
LOC110738808	XM_021919248.1	Known_gene	1	3268644	3269782	NW_018743391.1	+	1139	1139	XP_021774940.1|3.8e-122|calmodulin-like protein 3 [Chenopodium quinoa]
LOC110738807	BGI_novel_T005568,XM_021919244.1,XM_021919246.1,XM_021919247.1,XM_021919245.1	Known_gene	5	3229044	3234192	NW_018743391.1	-	5149	3696	XP_021774939.1|0.0e+00|putative disease resistance RPP13-like protein 1 isoform X3 [Chenopodium quinoa]
LOC110738806	XM_021919241.1,XM_021919239.1,BGI_novel_T005569,XM_021919243.1,BGI_novel_T005570,BGI_novel_T005573,XM_021919242.1,BGI_novel_T005572,BGI_novel_T005571	Known_gene	9	3229044	3240626	NW_018743391.1	-	11583	7822	XP_021774935.1|0.0e+00|uncharacterized protein LOC110738806 isoform X3 [Chenopodium quinoa]
LOC110738805	XM_021919238.1,XM_021919237.1	Known_gene	2	3196173	3216691	NW_018743391.1	-	20519	3743	XP_021774929.1|0.0e+00|uncharacterized protein LOC110738805 isoform X1 [Chenopodium quinoa]
LOC110738804	XM_021919240.1,BGI_novel_T000548	Known_gene	2	985200	989937	NW_018742244.1	+	4738	2482	XP_021753005.1|0.0e+00|F-box/LRR-repeat protein 10-like [Chenopodium quinoa]
LOC110738803	XM_021919236.1	Known_gene	1	3192058	3195294	NW_018743391.1	+	3237	1453	XP_021774928.1|2.7e-112|protein FAR1-RELATED SEQUENCE 5-like [Chenopodium quinoa]
LOC110738802	XM_021919235.1	Known_gene	1	3183650	3191541	NW_018743391.1	+	7892	1532	XP_021774927.1|2.8e-136|protein FAR1-RELATED SEQUENCE 5-like [Chenopodium quinoa]
LOC110738801	XM_021919232.1,XM_021919234.1,XM_021919233.1	Known_gene	3	3179835	3182552	NW_018743391.1	+	2718	2340	XP_021774924.1|3.6e-220|F-box protein At3g07870-like isoform X1 [Chenopodium quinoa]
LOC110738799	XM_021919231.1	Known_gene	1	3151829	3156175	NW_018743391.1	-	4347	1633	XP_021752616.1|2.0e-164|probable fructokinase-1 [Chenopodium quinoa]
LOC110738798	XM_021919230.1	Known_gene	1	3144808	3150715	NW_018743391.1	+	5908	1516	XP_021774922.1|3.5e-171|uncharacterized protein LOC110738798 [Chenopodium quinoa]
LOC110738796	XM_021919229.1	Known_gene	1	3127875	3130290	NW_018743391.1	+	2416	1310	XP_021774921.1|1.3e-142|B-box zinc finger protein 24-like [Chenopodium quinoa]
LOC110738795	XM_021919228.1	Known_gene	1	3086367	3095751	NW_018743391.1	-	9385	2336	XP_021774920.1|0.0e+00|lysine--tRNA ligase, cytoplasmic-like [Chenopodium quinoa]
LOC110738794	XM_021919227.1	Known_gene	1	3079722	3081538	NW_018743391.1	-	1817	1817	XP_021774919.1|1.9e-152|RHOMBOID-like protein 13 [Chenopodium quinoa]
LOC110738793	XM_021919226.1	Known_gene	1	3072969	3077816	NW_018743391.1	+	4848	1721	XP_021774918.1|3.5e-180|protein ENHANCED DISEASE RESISTANCE 2-like [Chenopodium quinoa]
LOC110738792	XM_021919255.1	Known_gene	1	17823411	17825023	NW_018742204.1	-	1613	1014	XP_021774947.1|6.9e-192|F-box/FBD/LRR-repeat protein At1g13570-like [Chenopodium quinoa]
LOC110738791	XM_021919225.1	Known_gene	1	3057080	3060543	NW_018743391.1	+	3464	1432	XP_021774917.1|1.9e-232|B3 domain-containing protein REM5-like [Chenopodium quinoa]
LOC110738790	XM_021919224.1	Known_gene	1	3060611	3063137	NW_018743391.1	-	2527	1856	XP_021774916.1|1.6e-242|protein STRICTOSIDINE SYNTHASE-LIKE 13-like [Chenopodium quinoa]
LOC110738789	XM_021919223.1	Known_gene	1	3046709	3051489	NW_018743391.1	+	4781	1131	XP_021774915.1|9.4e-97|ataxin-7-like protein 3 [Chenopodium quinoa]
LOC110738788	XM_021919221.1	Known_gene	1	3009624	3011555	NW_018743391.1	+	1932	1331	XP_021774913.1|2.4e-216|endochitinase-like [Chenopodium quinoa]
LOC110738787	XM_021919220.1	Known_gene	1	3004912	3006977	NW_018743391.1	+	2066	1463	XP_021774912.1|4.4e-216|endochitinase-like [Chenopodium quinoa]
LOC110738786	XM_021919219.1	Known_gene	1	2987387	2997940	NW_018743391.1	-	10554	2345	XP_021863403.1|0.0e+00|electron transfer flavoprotein-ubiquinone oxidoreductase, mitochondrial [Spinacia oleracea]
LOC110738785	XM_021919222.1	Known_gene	1	981056	983750	NW_018742244.1	+	2695	2142	XP_021849661.1|1.2e-225|alpha-amylase-like [Spinacia oleracea]
LOC110738784	XM_021919218.1	Known_gene	1	2972951	2981190	NW_018743391.1	-	8240	2343	XP_021774910.1|2.7e-215|probable transcription factor PosF21 [Chenopodium quinoa]
LOC110738783	XM_021919217.1	Known_gene	1	2940764	2946426	NW_018743391.1	-	5663	1556	XP_021774909.1|2.8e-232|uncharacterized protein LOC110738783 [Chenopodium quinoa]
LOC110738782	XM_021919216.1	Known_gene	1	2921437	2927156	NW_018743391.1	+	5720	1758	XP_021774908.1|3.8e-254|F-box protein SKIP16-like [Chenopodium quinoa]
LOC110738781	XM_021919215.1	Known_gene	1	2927255	2932959	NW_018743391.1	-	5705	2649	XP_021774907.1|0.0e+00|putative wall-associated receptor kinase-like 16 [Chenopodium quinoa]
LOC110738780	XM_021919210.1,XM_021919213.1,XM_021919214.1,XM_021919211.1,XM_021919209.1	Known_gene	5	2884240	2896979	NW_018743391.1	+	12740	3523	XP_021774901.1|0.0e+00|flowering time control protein FPA-like [Chenopodium quinoa]
LOC110738779	XM_021919208.1	Known_gene	1	2870039	2881274	NW_018743391.1	+	11236	2032	XP_021774900.1|0.0e+00|3beta-hydroxysteroid-dehydrogenase/decarboxylase-like [Chenopodium quinoa]
LOC110738778	XM_021919212.1	Known_gene	1	963020	964744	NW_018742244.1	+	1725	1435	XP_021774904.1|8.0e-210|(RS)-norcoclaurine 6-O-methyltransferase-like [Chenopodium quinoa]
LOC110738777	BGI_novel_T005563,XM_021919207.1	Known_gene	2	2865037	2868164	NW_018743391.1	+	3128	2162	XP_021719099.1|4.0e-91|vacuolar-processing enzyme-like [Chenopodium quinoa]
LOC110738776	XM_021919206.1	Known_gene	1	2823797	2830047	NW_018743391.1	-	6251	1318	XP_021774898.1|2.4e-189|hydroxyacylglutathione hydrolase 2, mitochondrial-like [Chenopodium quinoa]
LOC110738775	XM_021919205.1	Known_gene	1	2815532	2823399	NW_018743391.1	+	7868	2038	XP_021774897.1|9.4e-257|calreticulin-3-like [Chenopodium quinoa]
LOC110738773	BGI_novel_T005562,XM_021919204.1	Known_gene	2	2806538	2809806	NW_018743391.1	-	3269	2892	XP_021774896.1|0.0e+00|uncharacterized protein LOC110738773 [Chenopodium quinoa]
LOC110738772	XM_021919203.1	Known_gene	1	2792984	2798072	NW_018743391.1	+	5089	2882	XP_021774895.1|0.0e+00|uncharacterized protein LOC110738772 [Chenopodium quinoa]
LOC110738771	XM_021919202.1,XM_021919199.1,XM_021919200.1	Known_gene	3	2772531	2774321	NW_018743391.1	+	1791	516	XP_008793782.2|5.3e-31|60S ribosomal protein L38 [Phoenix dactylifera]
LOC110738770	BGI_novel_T005559,BGI_novel_T005560,XM_021919198.1	Known_gene	3	2753783	2759571	NW_018743391.1	+	5789	1806	XP_021774890.1|4.0e-237|uncharacterized protein LOC110738770 [Chenopodium quinoa]
LOC110738769	XM_021919201.1	Known_gene	1	950991	961612	NW_018742244.1	+	10622	5520	XP_021774893.1|0.0e+00|transcriptional elongation regulator MINIYO-like [Chenopodium quinoa]
LOC110738767	XM_021919196.1,XM_021919197.1	Known_gene	2	2729680	2733407	NW_018743391.1	+	3728	2501	XP_021774888.1|0.0e+00|uncharacterized protein LOC110738767 [Chenopodium quinoa]
LOC110738766	XM_021919195.1	Known_gene	1	2717315	2723858	NW_018743391.1	+	6544	1682	XP_021774887.1|1.6e-140|uncharacterized protein LOC110738766 [Chenopodium quinoa]
LOC110738765	XM_021919194.1	Known_gene	1	2690960	2694113	NW_018743391.1	-	3154	1310	XP_021774886.1|3.1e-200|probable peroxidase 61 [Chenopodium quinoa]
LOC110738764	XM_021919192.1,BGI_novel_T005558,XM_021919189.1,XM_021919191.1,XM_021919193.1	Known_gene	5	2668329	2680535	NW_018743391.1	+	12207	3385	XP_021774881.1|0.0e+00|small G protein signaling modulator 1-like isoform X1 [Chenopodium quinoa]
LOC110738763	XM_021919187.1,XM_021919188.1,BGI_novel_T005557	Known_gene	3	2647789	2655731	NW_018743391.1	-	7943	1337	XP_021774880.1|9.7e-178|peroxisomal membrane protein 13-like isoform X2 [Chenopodium quinoa]
LOC110738762	XM_021919190.1	Known_gene	1	939294	943548	NW_018742244.1	-	4255	1618	XP_021774882.1|1.5e-228|F-box protein SKIP23-like [Chenopodium quinoa]
LOC110738761	BGI_novel_T005556,XM_021919184.1,XM_021919186.1,XM_021919185.1	Known_gene	4	2640007	2645955	NW_018743391.1	+	5949	2244	XP_021774877.1|8.7e-280|uncharacterized GPI-anchored protein At1g61900-like isoform X2 [Chenopodium quinoa]
LOC110738760	XM_021919183.1	Known_gene	1	2627430	2629788	NW_018743391.1	+	2359	1057	XP_021774875.1|2.9e-140|pentatricopeptide repeat-containing protein At3g46870-like [Chenopodium quinoa]
LOC110738759	BGI_novel_T005555,XM_021919182.1	Known_gene	2	2630324	2637415	NW_018743391.1	-	7092	1768	XP_021774874.1|1.1e-269|TBC1 domain family member 22B-like [Chenopodium quinoa]
LOC110738758	XM_021919181.1	Known_gene	1	2616072	2619142	NW_018743391.1	+	3071	1359	XP_021774873.1|3.4e-125|peptidyl-prolyl cis-trans isomerase FKBP16-3, chloroplastic-like [Chenopodium quinoa]
LOC110738757	XM_021919180.1	Known_gene	1	2609841	2615612	NW_018743391.1	+	5772	2459	XP_021774872.1|0.0e+00|wall-associated receptor kinase 5-like [Chenopodium quinoa]
LOC110738756	BGI_novel_T005552,BGI_novel_T005554,BGI_novel_T005550,XM_021919179.1,BGI_novel_T005551,BGI_novel_T005553	Known_gene	6	2597929	2609171	NW_018743391.1	+	11243	6614	XP_021774871.1|3.0e-308|poly(ADP-ribose) glycohydrolase 1-like [Chenopodium quinoa]
LOC110738753	XM_021919178.1	Known_gene	1	935230	937387	NW_018742244.1	-	2158	2158	XP_021774870.1|1.2e-230|F-box protein SKIP23-like [Chenopodium quinoa]
LOC110738752	XM_021919177.1	Known_gene	1	2490401	2493592	NW_018743391.1	-	3192	3116	XP_021765452.1|3.4e-141|uncharacterized protein LOC110729970 [Chenopodium quinoa]
LOC110738751	XM_021919176.1	Known_gene	1	2476423	2478387	NW_018743391.1	+	1965	1093	XP_021774868.1|1.0e-169|acidic endochitinase SP2-like [Chenopodium quinoa]
LOC110738750	XM_021919175.1	Known_gene	1	2462814	2464280	NW_018743391.1	+	1467	1467	XP_021774867.1|6.9e-209|ribosomal L1 domain-containing protein 1-like [Chenopodium quinoa]
LOC110738749	XM_021919174.1	Known_gene	1	2450765	2454666	NW_018743391.1	-	3902	1191	XP_021774866.1|1.6e-134|uncharacterized protein LOC110738749 [Chenopodium quinoa]
LOC110738748	BGI_novel_T005547,XM_021919171.1,XM_021919173.1,XM_021919170.1,XM_021919172.1	Known_gene	5	2436712	2450420	NW_018743391.1	+	13709	1910	XP_021774862.1|2.2e-247|uncharacterized protein LOC110738748 isoform X1 [Chenopodium quinoa]
LOC110738747	XM_021919168.1	Known_gene	1	2426922	2435494	NW_018743391.1	+	8573	2956	XP_021774860.1|0.0e+00|DNA cross-link repair protein SNM1-like [Chenopodium quinoa]
LOC110738745	XM_021919167.1	Known_gene	1	2421877	2424460	NW_018743391.1	+	2584	2251	XP_021774859.1|0.0e+00|uncharacterized protein LOC110738745 [Chenopodium quinoa]
LOC110738744	XM_021919169.1	Known_gene	1	902200	905770	NW_018742244.1	+	3571	2324	XP_021774861.1|0.0e+00|rop guanine nucleotide exchange factor 1-like [Chenopodium quinoa]
LOC110738743	XM_021919166.1	Known_gene	1	2412122	2415432	NW_018743391.1	-	3311	3311	XP_021774858.1|0.0e+00|putative receptor protein kinase ZmPK1 [Chenopodium quinoa]
LOC110738742	XM_021919165.1	Known_gene	1	2380358	2383365	NW_018743391.1	-	3008	1601	XP_021774857.1|7.1e-167|thioredoxin-like 1-1, chloroplastic [Chenopodium quinoa]
LOC110738741	XM_021919164.1	Known_gene	1	2374968	2379637	NW_018743391.1	+	4670	1214	XP_021774856.1|8.0e-187|(DL)-glycerol-3-phosphatase 2-like [Chenopodium quinoa]
LOC110738740	XM_021919163.1	Known_gene	1	2369670	2373810	NW_018743391.1	-	4141	955	XP_021774855.1|1.7e-62|54S ribosomal protein L51, mitochondrial-like [Chenopodium quinoa]
LOC110738739	XM_021919162.1,XM_021919159.1,XM_021919160.1,XM_021919161.1	Known_gene	4	2356437	2368883	NW_018743391.1	+	12447	2297	XP_021845547.1|3.7e-278|eukaryotic translation initiation factor 2A [Spinacia oleracea]
LOC110738738	XM_021919157.1	Known_gene	1	2345118	2351584	NW_018743391.1	-	6467	1514	XP_021774849.1|8.8e-143|uncharacterized protein LOC110738738 [Chenopodium quinoa]
LOC110738737	XM_021919155.1,XM_021919156.1	Known_gene	2	2307435	2314945	NW_018743391.1	-	7511	1371	XP_021774848.1|8.6e-65|transcription factor bHLH153-like isoform X2 [Chenopodium quinoa]
LOC110738736	XM_021919158.1	Known_gene	1	881388	885294	NW_018742244.1	-	3907	1290	XP_021752993.1|1.5e-127|coiled-coil domain-containing protein 124-like [Chenopodium quinoa]
LOC110738735	XM_021919154.1	Known_gene	1	2298158	2302000	NW_018743391.1	-	3843	844	XP_021774846.1|8.8e-84|selenoprotein F-like [Chenopodium quinoa]
LOC110738734	XM_021919153.1	Known_gene	1	2304029	2306477	NW_018743391.1	+	2449	1490	XP_021774845.1|3.2e-185|protein IRX15-LIKE-like [Chenopodium quinoa]
LOC110738733	XM_021919152.1,XM_021919151.1	Known_gene	2	2221308	2234245	NW_018743391.1	+	12938	2285	XP_021774843.1|0.0e+00|BAG-associated GRAM protein 1-like isoform X1 [Chenopodium quinoa]
LOC110738732	XM_021919149.1,BGI_novel_T005546,XM_021919150.1	Known_gene	3	2234426	2260698	NW_018743391.1	-	26273	6641	XP_021774842.1|0.0e+00|transcription initiation factor TFIID subunit 1-like isoform X2 [Chenopodium quinoa]
LOC110738731	XM_021919148.1	Known_gene	1	2206876	2212345	NW_018743391.1	-	5470	1384	XP_021774840.1|2.0e-218|NADPH-dependent aldo-keto reductase, chloroplastic-like [Chenopodium quinoa]
LOC110738730	XM_021919145.1,XM_021919147.1	Known_gene	2	2195091	2202124	NW_018743391.1	-	7034	2678	XP_021774837.1|2.6e-283|uncharacterized protein LOC110738730 isoform X1 [Chenopodium quinoa]
LOC110738729	XM_021919144.1	Known_gene	1	2190782	2193870	NW_018743391.1	+	3089	1623	XP_021774836.1|1.8e-64|bet1-like protein At4g14600 [Chenopodium quinoa]
LOC110738728	XM_021919143.1	Known_gene	1	2181625	2189374	NW_018743391.1	-	7750	2472	XP_021774835.1|7.6e-285|uncharacterized protein LOC110738728 [Chenopodium quinoa]
LOC110738727	XM_021919146.1	Known_gene	1	889642	892087	NW_018742244.1	-	2446	2446	XP_021774838.1|1.7e-191|glycine-rich cell wall structural protein 1-like [Chenopodium quinoa]
LOC110738726	XM_021919142.1	Known_gene	1	2165591	2169297	NW_018743391.1	-	3707	1188	XP_021774834.1|8.0e-107|uncharacterized protein LOC110738726 [Chenopodium quinoa]
LOC110738725	XM_021919139.1,XM_021919140.1,XM_021919137.1,XM_021919138.1,XM_021919141.1	Known_gene	5	2124452	2135932	NW_018743391.1	+	11481	1740	XP_021774829.1|1.5e-209|stearoyl-[acyl-carrier-protein] 9-desaturase, chloroplastic-like isoform X1 [Chenopodium quinoa]
LOC110738724	XM_021919134.1,XM_021919135.1,XM_021919136.1,XM_021919133.1	Known_gene	4	2135865	2141361	NW_018743391.1	-	5497	2457	XP_021774825.1|0.0e+00|protein IQ-DOMAIN 14-like [Chenopodium quinoa]
LOC110738723	XM_021919130.1,XM_021919131.1	Known_gene	2	2112216	2114880	NW_018743391.1	-	2665	1552	XP_021774823.1|2.5e-225|stearoyl-[acyl-carrier-protein] 9-desaturase, chloroplastic-like isoform X2 [Chenopodium quinoa]
LOC110738722	XM_021919129.1	Known_gene	1	2071911	2078138	NW_018743391.1	+	6228	1707	XP_021774829.1|1.6e-161|stearoyl-[acyl-carrier-protein] 9-desaturase, chloroplastic-like isoform X1 [Chenopodium quinoa]
LOC110738721	XM_021919132.1	Known_gene	1	886598	888272	NW_018742244.1	+	1675	1675	XP_021774824.1|1.9e-295|extensin-like [Chenopodium quinoa]
LOC110738720	XM_021919128.1	Known_gene	1	2044966	2047991	NW_018743391.1	+	3026	1481	XP_021774820.1|2.1e-213|stearoyl-[acyl-carrier-protein] 9-desaturase, chloroplastic-like [Chenopodium quinoa]
LOC110738719	XM_021919127.1	Known_gene	1	2037668	2042957	NW_018743391.1	+	5290	1781	XP_021845521.1|1.9e-216|stearoyl-[acyl-carrier-protein] 9-desaturase, chloroplastic [Spinacia oleracea]
LOC110738718	XM_021919126.1	Known_gene	1	2028783	2029630	NW_018743391.1	+	848	848	XP_021774818.1|2.7e-96|uncharacterized protein LOC110738718 [Chenopodium quinoa]
LOC110738716	XM_021919125.1	Known_gene	1	1988226	1996887	NW_018743391.1	-	8662	1505	P32260.2|7.1e-201|RecName: Full=Cysteine synthase, chloroplastic/chromoplastic; AltName: Full=CSase B; Short=CS-B; AltName: Full=O-acetylserine (thiol)-lyase; AltName: Full=O-acetylserine sulfhydrylase; AltName: Full=OAS-TL B; Flags: Precursor [Spinacia oleracea]
LOC110738715	XM_021919124.1,BGI_novel_T005545	Known_gene	2	1975434	1982702	NW_018743391.1	-	7269	1485	XP_021774816.1|2.1e-165|short-chain dehydrogenase/reductase 2b-like [Chenopodium quinoa]
LOC110738712	XM_021919122.1	Known_gene	1	1951967	1960834	NW_018743391.1	+	8868	2442	XP_021774814.1|0.0e+00|uncharacterized protein LOC110738712 [Chenopodium quinoa]
LOC110738711	XM_021919121.1	Known_gene	1	1938225	1947461	NW_018743391.1	-	9237	2115	XP_010672451.1|3.0e-282|PREDICTED: T-complex protein 1 subunit beta [Beta vulgaris subsp. vulgaris]
LOC110738710	XM_021919123.1	Known_gene	1	874851	880851	NW_018742244.1	+	6001	2300	XP_021848507.1|8.3e-294|L-ascorbate oxidase homolog [Spinacia oleracea]
LOC110738709	XM_021919120.1	Known_gene	1	1918963	1920494	NW_018743391.1	-	1532	873	XP_021774812.1|1.0e-74|uncharacterized protein LOC110738709 [Chenopodium quinoa]
LOC110738708	XM_021919119.1	Known_gene	1	1921110	1936741	NW_018743391.1	-	15632	5375	XP_021774811.1|0.0e+00|probable phosphoinositide phosphatase SAC9 [Chenopodium quinoa]
LOC110738707	XM_021919116.1,XM_021919118.1,XM_021919117.1	Known_gene	3	1913242	1917753	NW_018743391.1	-	4512	1314	XP_021774809.1|1.6e-148|uncharacterized protein LOC110738707 isoform X2 [Chenopodium quinoa]
LOC110738706	XM_021919114.1,XM_021919115.1	Known_gene	2	1905045	1913050	NW_018743391.1	+	8006	2442	XP_021774807.1|0.0e+00|2-isopropylmalate synthase A-like isoform X2 [Chenopodium quinoa]
LOC110738705	XM_021919110.1,XM_021919112.1,XM_021919113.1,BGI_novel_T005542	Known_gene	4	1890056	1899516	NW_018743391.1	+	9461	5970	XP_021849280.1|0.0e+00|pentatricopeptide repeat-containing protein At3g18110, chloroplastic [Spinacia oleracea]
LOC110738704	XM_021919109.1	Known_gene	1	1872977	1883962	NW_018743391.1	-	10986	1730	XP_021774801.1|8.9e-240|mitogen-activated protein kinase homolog MMK1-like [Chenopodium quinoa]
LOC110738703	XM_021919108.1	Known_gene	1	1856034	1863026	NW_018743391.1	+	6993	1263	XP_021774800.1|1.7e-107|zinc finger Ran-binding domain-containing protein 2-like [Chenopodium quinoa]
LOC110738702	XM_021919111.1	Known_gene	1	867642	871290	NW_018742244.1	-	3649	1601	XP_021774803.1|5.1e-189|uncharacterized protein LOC110738702 [Chenopodium quinoa]
LOC110738701	XM_021919107.1,XM_021919106.1	Known_gene	2	1863768	1870648	NW_018743391.1	-	6881	2041	XP_021774798.1|4.2e-265|eukaryotic translation initiation factor 2 subunit gamma-like [Chenopodium quinoa]
LOC110738700	XM_021919104.1,XM_021919105.1	Known_gene	2	1829568	1853796	NW_018743391.1	-	24229	2975	XP_021774796.1|0.0e+00|mRNA-capping enzyme-like [Chenopodium quinoa]
LOC110738699	XM_021919103.1	Known_gene	1	1822515	1826510	NW_018743391.1	-	3996	2523	XP_021751812.1|0.0e+00|formin-like protein 2 [Chenopodium quinoa]
LOC110738697	XM_021919102.1	Known_gene	1	1752238	1756487	NW_018743391.1	+	4250	2953	XP_021774794.1|0.0e+00|putative wall-associated receptor kinase-like 16 [Chenopodium quinoa]
LOC110738696	XM_021919100.1	Known_gene	1	1736984	1742662	NW_018743391.1	-	5679	1492	XP_021774792.1|1.5e-166|high mobility group B protein 10-like [Chenopodium quinoa]
LOC110738695	XM_021919097.1,XM_021919098.1,XM_021919099.1	Known_gene	3	1732028	1736247	NW_018743391.1	+	4220	1846	XP_021774789.1|1.9e-213|transcription elongation factor TFIIS-like [Chenopodium quinoa]
LOC110738694	XM_021919101.1	Known_gene	1	865688	866741	NW_018742244.1	+	1054	955	XP_021774793.1|1.4e-106|dehydrin COR410-like [Chenopodium quinoa]
LOC110738693	XM_021919096.1	Known_gene	1	1725057	1729621	NW_018743391.1	-	4565	799	XP_021774788.1|1.7e-44|sm-like protein LSM36B [Chenopodium quinoa]
LOC110738692	XM_021919093.1,XM_021919094.1,XM_021919095.1	Known_gene	3	1719471	1724107	NW_018743391.1	+	4637	2130	XP_021774785.1|7.0e-244|BTB/POZ and TAZ domain-containing protein 3-like isoform X1 [Chenopodium quinoa]
LOC110738691	XM_021919092.1	Known_gene	1	1698111	1702351	NW_018743391.1	-	4241	2183	XP_021774784.1|1.3e-267|UDP-glycosyltransferase 74F2-like [Chenopodium quinoa]
LOC110738690	XM_021919091.1	Known_gene	1	1686585	1687539	NW_018743391.1	-	955	843	XP_021774783.1|9.6e-139|uncharacterized protein LOC110738690 [Chenopodium quinoa]
LOC110738688	XM_021919090.1	Known_gene	1	1649771	1650585	NW_018743391.1	-	815	815	XP_021774782.1|3.4e-133|UDP-glycosyltransferase 74E1-like [Chenopodium quinoa]
LOC110738687	XM_021919087.1,XM_021919088.1	Known_gene	2	1631947	1639489	NW_018743391.1	-	7543	4782	XP_021774780.1|1.0e-266|UDP-glycosyltransferase 74E2-like isoform X2 [Chenopodium quinoa]
LOC110738686	XM_021919089.1	Known_gene	1	861748	865336	NW_018742244.1	+	3589	1858	XP_021774781.1|0.0e+00|lysine histidine transporter-like 8 [Chenopodium quinoa]
LOC110738685	XM_021919085.1,BGI_novel_T005538,XM_021919086.1	Known_gene	3	1618346	1621991	NW_018743391.1	-	3646	2361	XP_021774777.1|1.6e-125|protein GIGAS CELL1-like isoform X1 [Chenopodium quinoa]
LOC110738684	XM_021919084.1	Known_gene	1	1612147	1616999	NW_018743391.1	-	4853	1155	XP_021774776.1|1.8e-148|peptidyl-prolyl cis-trans isomerase-like [Chenopodium quinoa]
LOC110738682	BGI_novel_T005535,XM_021919083.1,XM_021919082.1	Known_gene	3	1577342	1586191	NW_018743391.1	-	8850	3044	XP_021774774.1|8.7e-288|UDP-glycosyltransferase 74E2-like isoform X1 [Chenopodium quinoa]
LOC110738681	XM_021919081.1	Known_gene	1	1558292	1576924	NW_018743391.1	+	18633	3042	XP_021774773.1|0.0e+00|mitochondrial proton/calcium exchanger protein-like [Chenopodium quinoa]
LOC110738680	XM_021919080.1	Known_gene	1	1543598	1552960	NW_018743391.1	+	9363	2121	XP_021774772.1|4.0e-274|dual specificity protein kinase shkC-like [Chenopodium quinoa]
LOC110738679	XM_021919079.1	Known_gene	1	1486083	1488191	NW_018743391.1	+	2109	1879	XP_021751032.1|2.2e-135|uncharacterized protein LOC110716697 [Chenopodium quinoa]
LOC110738678	XM_021919077.1	Known_gene	1	1523452	1533028	NW_018743391.1	-	9577	1985	XP_021774769.1|2.6e-275|acetolactate synthase small subunit 1, chloroplastic-like [Chenopodium quinoa]
LOC110738677	XM_021919076.1	Known_gene	1	1460537	1472872	NW_018743391.1	+	12336	1573	XP_021751880.1|1.3e-173|2-alkenal reductase (NADP(+)-dependent)-like [Chenopodium quinoa]
LOC110738676	XM_021919075.1	Known_gene	1	1454147	1458830	NW_018743391.1	+	4684	1561	XP_021774768.1|1.3e-173|2-alkenal reductase (NADP(+)-dependent)-like [Chenopodium quinoa]
LOC110738675	XM_021919078.1	Known_gene	1	848434	852383	NW_018742244.1	+	3950	2071	XP_021774770.1|0.0e+00|lysine histidine transporter-like 8 [Chenopodium quinoa]
LOC110738672	XM_021919074.1	Known_gene	1	1385246	1391521	NW_018743391.1	-	6276	1555	XP_021774766.1|1.5e-193|eukaryotic translation initiation factor 3 subunit I-like [Chenopodium quinoa]
LOC110738671	XM_021919073.1,XM_021919072.1	Known_gene	2	1380769	1384068	NW_018743391.1	-	3300	2075	XP_021774764.1|3.8e-269|eukaryotic translation initiation factor 2 subunit gamma-like isoform X1 [Chenopodium quinoa]
LOC110738670	XM_021919071.1	Known_gene	1	1368886	1372848	NW_018743391.1	-	3963	1876	XP_021774763.1|2.2e-236|polygalacturonase-like [Chenopodium quinoa]
LOC110738669	XM_021919070.1	Known_gene	1	1348723	1351383	NW_018743391.1	+	2661	2661	XP_021774762.1|0.0e+00|uncharacterized protein LOC110738669 [Chenopodium quinoa]
LOC110738666	XM_021919068.1,XM_021919067.1,XM_021919069.1	Known_gene	3	1306681	1312053	NW_018743391.1	+	5373	1590	XP_021774761.1|1.0e-189|eukaryotic translation initiation factor 3 subunit I-like isoform X2 [Chenopodium quinoa]
LOC110738665	XM_021919066.1,XM_021919065.1	Known_gene	2	1288883	1295643	NW_018743391.1	+	6761	4661	XP_021774757.1|0.0e+00|type I inositol polyphosphate 5-phosphatase 13-like isoform X1 [Chenopodium quinoa]
LOC110738664	XM_021919064.1,XM_021919063.1	Known_gene	2	1295760	1299471	NW_018743391.1	-	3712	2402	XP_021774755.1|0.0e+00|ankyrin repeat-containing protein At5g02620-like [Chenopodium quinoa]
LOC110738663	BGI_novel_T005533,XM_021919060.1,XM_021919062.1	Known_gene	3	1277984	1282394	NW_018743391.1	+	4411	1400	XP_021774752.1|3.0e-125|probable thiol methyltransferase 2 isoform X1 [Chenopodium quinoa]
LOC110738662	XM_021919059.1	Known_gene	1	1177451	1188284	NW_018743391.1	+	10834	2058	XP_021774751.1|0.0e+00|aspartate--tRNA ligase 2, cytoplasmic-like [Chenopodium quinoa]
LOC110738661	XM_021919058.1	Known_gene	1	1149560	1155886	NW_018743391.1	+	6327	1422	XP_021774750.1|3.4e-152|uncharacterized protein LOC110738661 [Chenopodium quinoa]
LOC110738660	XM_021919061.1	Known_gene	1	818273	818898	NW_018742244.1	+	626	626	XP_021774753.1|2.0e-69|auxin-responsive protein SAUR63-like [Chenopodium quinoa]
LOC110738659	XM_021919056.1,BGI_novel_T005532,XM_021919057.1,XM_021919054.1,XM_021919055.1	Known_gene	5	1158160	1169819	NW_018743391.1	-	11660	2618	XP_021774746.1|0.0e+00|general transcription factor 3C polypeptide 5-like isoform X1 [Chenopodium quinoa]
LOC110738658	XM_021919053.1,XM_021919052.1	Known_gene	2	1095945	1104033	NW_018743391.1	+	8089	1705	XP_021774745.1|1.5e-206|outer envelope pore protein 37, chloroplastic-like isoform X2 [Chenopodium quinoa]
LOC110738657	XM_021919051.1	Known_gene	1	1078453	1092577	NW_018743391.1	+	14125	2236	XP_021774743.1|0.0e+00|la-related protein 6B [Chenopodium quinoa]
LOC110738656	XM_021919049.1,XM_021919050.1	Known_gene	2	1065594	1077182	NW_018743391.1	+	11589	1864	XP_021774742.1|2.8e-284|inositol 1,3,4-trisphosphate 5/6-kinase 4-like isoform X2 [Chenopodium quinoa]
LOC110738655	XM_021919047.1	Known_gene	1	1054041	1056800	NW_018743391.1	-	2760	2760	XP_021774739.1|0.0e+00|uncharacterized protein LOC110738655 [Chenopodium quinoa]
LOC110738654	XM_021919046.1,XM_021919045.1	Known_gene	2	1049267	1053152	NW_018743391.1	-	3886	2024	XP_021774737.1|4.3e-177|tRNA (adenine(58)-N(1))-methyltransferase catalytic subunit TRMT61A-like [Chenopodium quinoa]
LOC110738653	XM_021919048.1	Known_gene	1	817077	817840	NW_018742244.1	-	764	764	XP_021774740.1|1.7e-70|auxin-responsive protein SAUR64-like [Chenopodium quinoa]
LOC110738651	XM_021919043.1,BGI_novel_T005531,XM_021919044.1	Known_gene	3	1035062	1038862	NW_018743391.1	+	3801	1530	XP_021774735.1|4.4e-158|thioredoxin-like fold domain-containing protein MRL7L, chloroplastic isoform X1 [Chenopodium quinoa]
LOC110738650	XM_021919042.1	Known_gene	1	955568	960515	NW_018743391.1	+	4948	1885	XP_021774734.1|6.4e-175|wall-associated receptor kinase 2-like [Chenopodium quinoa]
LOC110738649	XM_021919041.1	Known_gene	1	986910	991378	NW_018743391.1	-	4469	3049	XP_021774733.1|0.0e+00|wall-associated receptor kinase 2-like [Chenopodium quinoa]
LOC110738648	XM_021919040.1	Known_gene	1	937535	944377	NW_018743391.1	+	6843	3435	XP_021774732.1|0.0e+00|wall-associated receptor kinase 2-like [Chenopodium quinoa]
LOC110738647	XM_021919039.1	Known_gene	1	900271	917971	NW_018743391.1	+	17701	2543	XP_021774731.1|0.0e+00|poly(ADP-ribose) glycohydrolase 1-like [Chenopodium quinoa]
LOC110738646	XM_021919038.1	Known_gene	1	891972	897523	NW_018743391.1	-	5552	1300	XP_021774730.1|6.2e-121|6,7-dimethyl-8-ribityllumazine synthase, chloroplastic [Chenopodium quinoa]
LOC110738645	XM_021919037.1	Known_gene	1	887368	890723	NW_018743391.1	-	3356	1469	XP_021774729.1|9.1e-278|inactive glucose-1-phosphate adenylyltransferase small subunit 2, chloroplastic-like [Chenopodium quinoa]
LOC110738644	XM_021919036.1	Known_gene	1	884384	887307	NW_018743391.1	+	2924	2416	XP_021774728.1|3.0e-302|cytochrome P450 84A1-like [Chenopodium quinoa]
LOC110738643	XM_021919035.1	Known_gene	1	861719	865575	NW_018743391.1	-	3857	2478	XP_021774727.1|0.0e+00|RAP domain-containing protein, chloroplastic-like [Chenopodium quinoa]
LOC110738641	XM_021919034.1	Known_gene	1	856863	861184	NW_018743391.1	-	4322	1377	XP_021774726.1|1.1e-187|uncharacterized protein LOC110738641 [Chenopodium quinoa]
LOC110738640	BGI_novel_T005530,XM_021919033.1	Known_gene	2	804723	813402	NW_018743391.1	+	8680	3700	XP_021774725.1|0.0e+00|ankyrin repeat protein SKIP35-like [Chenopodium quinoa]
LOC110738639	XM_021919032.1	Known_gene	1	756825	764530	NW_018743391.1	-	7706	1846	XP_021774724.1|3.1e-259|guanosine nucleotide diphosphate dissociation inhibitor 2-like [Chenopodium quinoa]
LOC110738637	XM_021919031.1	Known_gene	1	728031	730333	NW_018743391.1	+	2303	619	PIA42862.1|1.3e-28|hypothetical protein AQUCO_02000366v1, partial [Aquilegia coerulea]
LOC110738636	XM_021919030.1	Known_gene	1	712084	722748	NW_018743391.1	-	10665	1453	XP_021774722.1|1.0e-180|putative tRNA (cytidine(32)/guanosine(34)-2'-O)-methyltransferase [Chenopodium quinoa]
LOC110738635	XM_021919029.1,BGI_novel_T005528	Known_gene	2	692938	694767	NW_018743391.1	+	1830	1830	XP_021774721.1|8.2e-252|F-box/kelch-repeat protein SKIP20-like [Chenopodium quinoa]
LOC110738634	XM_021919027.1,XM_021919026.1	Known_gene	2	666594	675248	NW_018743391.1	+	8655	2104	XP_021774718.1|2.7e-291|cysteine protease ATG4-like isoform X1 [Chenopodium quinoa]
LOC110738632	XM_021919025.1,BGI_novel_T005527	Known_gene	2	585118	590332	NW_018743391.1	+	5215	2058	XP_021774717.1|1.2e-158|aminoacyl tRNA synthase complex-interacting multifunctional protein 1-like [Chenopodium quinoa]
LOC110738631	XM_021919024.1	Known_gene	1	590903	596497	NW_018743391.1	-	5595	2383	XP_010672546.1|0.0e+00|PREDICTED: methylenetetrahydrofolate reductase 1 [Beta vulgaris subsp. vulgaris]
LOC110738630	XM_021919022.1,XM_021919023.1	Known_gene	2	573826	583019	NW_018743391.1	+	9194	1905	XP_021774714.1|3.2e-259|methionine aminopeptidase 2B-like isoform X1 [Chenopodium quinoa]
LOC110738629	XM_021919020.1	Known_gene	1	561498	569252	NW_018743391.1	-	7755	3239	XP_021774712.1|1.3e-268|ultraviolet-B receptor UVR8-like [Chenopodium quinoa]
LOC110738628	XM_021919019.1	Known_gene	1	549507	552431	NW_018743391.1	+	2925	788	XP_021774711.1|2.7e-87|50S ribosomal protein L18, chloroplastic [Chenopodium quinoa]
LOC110738627	XM_021919018.1	Known_gene	1	552623	556379	NW_018743391.1	-	3757	1517	XP_021774710.1|2.6e-166|uncharacterized protein LOC110738627 [Chenopodium quinoa]
LOC110738625	XM_021919017.1	Known_gene	1	531398	540332	NW_018743391.1	+	8935	2492	XP_021774709.1|0.0e+00|DEAD-box ATP-dependent RNA helicase 50-like [Chenopodium quinoa]
LOC110738624	XM_021919016.1	Known_gene	1	523018	529873	NW_018743391.1	+	6856	2100	XP_010694126.1|8.9e-218|PREDICTED: pectin acetylesterase 10 [Beta vulgaris subsp. vulgaris]
LOC110738622	XM_021919014.1	Known_gene	1	496165	501468	NW_018743391.1	+	5304	750	XP_021774706.1|5.6e-82|transcription factor HY5-like [Chenopodium quinoa]
LOC110738620	XM_021919013.1	Known_gene	1	437241	440904	NW_018743391.1	-	3664	1105	XP_021774705.1|2.2e-111|auxin-responsive protein IAA31-like [Chenopodium quinoa]
LOC110738619	BGI_novel_T005523,XM_021919012.1,XM_021919011.1	Known_gene	3	349859	368094	NW_018743391.1	-	18236	1355	XP_021774703.1|2.9e-134|chromatin structure-remodeling complex protein BSH-like isoform X1 [Chenopodium quinoa]
LOC110738617	XM_021919368.1	Known_gene	1	3377909	3378865	NW_018742204.1	-	957	957	XP_021775060.1|1.5e-175|uncharacterized protein LOC110738617 [Chenopodium quinoa]
LOC110738615	XM_021919009.1,XM_021919008.1	Known_gene	2	138059	144015	NW_018743391.1	-	5957	826	XP_021774700.1|2.8e-74|signal recognition particle 19 kDa protein-like [Chenopodium quinoa]
LOC110738614	XM_021919007.1	Known_gene	1	132095	137921	NW_018743391.1	+	5827	993	XP_021774699.1|2.1e-92|1,4-dihydroxy-2-naphthoyl-CoA thioesterase 1-like [Chenopodium quinoa]
LOC110738613	XM_021919028.1,BGI_novel_T000545,XM_021919010.1,XM_021919021.1,XM_021919015.1	Known_gene	5	789039	795751	NW_018742244.1	-	6713	3213	XP_021774702.1|0.0e+00|alanine--tRNA ligase, chloroplastic/mitochondrial-like isoform X1 [Chenopodium quinoa]
LOC110738611	XM_021919006.1	Known_gene	1	95507	105623	NW_018743391.1	+	10117	1163	XP_021774698.1|1.6e-91|1,4-dihydroxy-2-naphthoyl-CoA thioesterase 1-like [Chenopodium quinoa]
LOC110738610	BGI_novel_T005521,XM_021919003.1,XM_021919005.1,XM_021919004.1	Known_gene	4	81150	93290	NW_018743391.1	+	12141	2709	XP_021774695.1|3.9e-297|aspartic proteinase-like isoform X1 [Chenopodium quinoa]
LOC110738609	XM_021919002.1	Known_gene	1	70509	80369	NW_018743391.1	+	9861	2749	XP_021774694.1|0.0e+00|glutamine--tRNA ligase, cytoplasmic-like [Chenopodium quinoa]
LOC110738608	XM_021919001.1	Known_gene	1	47036	59447	NW_018743391.1	-	12412	2701	XP_021774693.1|0.0e+00|SWI/SNF-related matrix-associated actin-dependent regulator of chromatin subfamily A-like protein 1 [Chenopodium quinoa]
LOC110738607	XM_021919000.1	Known_gene	1	39519	41516	NW_018743391.1	+	1998	1467	XP_021774692.1|1.4e-209|diacylglycerol O-acyltransferase 3, cytosolic-like [Chenopodium quinoa]
LOC110738606	XM_021918998.1	Known_gene	1	24419	35258	NW_018743391.1	-	10840	2704	XP_021774690.1|0.0e+00|5'-nucleotidase domain-containing protein 4-like [Chenopodium quinoa]
LOC110738605	XM_021918997.1	Known_gene	1	3320476	3320924	NW_018743391.1	-	449	390	XP_021774689.1|2.8e-72|uncharacterized protein LOC110738605 [Chenopodium quinoa]
LOC110738604	XM_021918999.1	Known_gene	1	769466	771777	NW_018742244.1	-	2312	1284	XP_021774691.1|1.8e-152|expansin-like A3 [Chenopodium quinoa]
LOC110738603	XM_021918996.1	Known_gene	1	3132660	3133901	NW_018743391.1	+	1242	1242	XP_021774688.1|6.6e-237|leucine-rich repeat receptor-like serine/threonine-protein kinase BAM2 [Chenopodium quinoa]
LOC110738602	XM_021918995.1	Known_gene	1	3038592	3039211	NW_018743391.1	+	620	465	XP_021774687.1|2.1e-87|B3 domain-containing protein REM9-like [Chenopodium quinoa]
LOC110738601	XM_021918994.1	Known_gene	1	2986589	2987353	NW_018743391.1	+	765	471	XP_021774686.1|2.1e-90|uncharacterized protein LOC110738601 [Chenopodium quinoa]
LOC110738600	XM_021918992.1	Known_gene	1	3791812	3793395	NW_018745410.1	+	1584	1584	XP_021727898.1|4.4e-310|uncharacterized protein LOC110695012 [Chenopodium quinoa]
LOC110738599	XM_021918993.1	Known_gene	1	762305	764675	NW_018742244.1	-	2371	1007	XP_021743128.1|3.7e-153|expansin-like A2 [Chenopodium quinoa]
LOC110738598	XM_021918991.1	Known_gene	1	2684362	2689929	NW_018743391.1	+	5568	2098	XP_021774683.1|0.0e+00|coatomer subunit delta-like [Chenopodium quinoa]
LOC110738597	XM_021918990.1	Known_gene	1	2625102	2625932	NW_018743391.1	-	831	606	XP_021774682.1|2.9e-113|uncharacterized protein LOC110738597 [Chenopodium quinoa]
LOC110738596	XM_021918989.1	Known_gene	1	2621090	2624469	NW_018743391.1	+	3380	2829	XP_021774681.1|0.0e+00|uncharacterized protein LOC110738596 [Chenopodium quinoa]
LOC110738595	XM_021918988.1	Known_gene	1	2619760	2620251	NW_018743391.1	-	492	492	XP_021774680.1|3.8e-87|uncharacterized protein LOC110738595 [Chenopodium quinoa]
LOC110738594	XM_021918987.1	Known_gene	1	2535153	2537801	NW_018743391.1	-	2649	1545	XP_021774679.1|2.4e-297|uncharacterized protein LOC110738594 [Chenopodium quinoa]
LOC110738593	XM_021918986.1	Known_gene	1	2527971	2528297	NW_018743391.1	+	327	327	XP_021774678.1|2.3e-56|uncharacterized protein LOC110738593 [Chenopodium quinoa]
LOC110738591	XM_021918984.1	Known_gene	1	2460027	2461171	NW_018743391.1	-	1145	363	NA
LOC110738590	XM_021918985.1	Known_gene	1	752296	754365	NW_018742244.1	-	2070	1236	XP_021774677.1|3.5e-153|expansin-like A2 [Chenopodium quinoa]
LOC110738589	XM_021918983.1	Known_gene	1	2455940	2458613	NW_018743391.1	+	2674	2439	XP_021774675.1|0.0e+00|uncharacterized protein LOC110738589 [Chenopodium quinoa]
LOC110738588	XM_021918982.1	Known_gene	1	2391877	2392662	NW_018743391.1	+	786	786	XP_021774674.1|4.0e-155|collagen alpha-5(IV) chain-like [Chenopodium quinoa]
LOC110738587	XM_021918981.1	Known_gene	1	2094991	2098173	NW_018743391.1	-	3183	2493	XP_021774673.1|0.0e+00|protein FAR1-RELATED SEQUENCE 5-like [Chenopodium quinoa]
LOC110738585	XM_021918979.1	Known_gene	1	1772090	1772620	NW_018743391.1	+	531	531	XP_021774671.1|2.1e-99|uncharacterized protein LOC110738585 [Chenopodium quinoa]
LOC110738584	XM_021918980.1	Known_gene	1	729688	732477	NW_018742244.1	-	2790	1307	XP_021774672.1|2.0e-135|cytokinin riboside 5'-monophosphate phosphoribohydrolase LOG5-like [Chenopodium quinoa]
LOC110738582	XM_021918978.1	Known_gene	1	1652863	1655747	NW_018743391.1	-	2885	2208	XP_021774670.1|0.0e+00|zinc finger MYM-type protein 1-like [Chenopodium quinoa]
LOC110738581	XM_021918977.1	Known_gene	1	1647911	1648462	NW_018743391.1	-	552	552	XP_021774669.1|6.6e-104|uncharacterized protein LOC110738581 [Chenopodium quinoa]
LOC110738580	XM_021918976.1	Known_gene	1	1600451	1602679	NW_018743391.1	-	2229	1680	XP_021774668.1|0.0e+00|disease resistance protein RGA2-like [Chenopodium quinoa]
LOC110738578	XM_021918974.1	Known_gene	1	1450516	1452612	NW_018743391.1	-	2097	1938	XP_021774666.1|0.0e+00|uncharacterized protein LOC110738578 [Chenopodium quinoa]
LOC110738577	XM_021918975.1	Known_gene	1	719065	720910	NW_018742244.1	-	1846	1343	XP_021774667.1|2.8e-185|NAC domain-containing protein 35-like [Chenopodium quinoa]
LOC110738576	XM_021918973.1	Known_gene	1	1417352	1419110	NW_018743391.1	+	1759	1203	XP_021774665.1|1.6e-235|polygalacturonase-like [Chenopodium quinoa]
LOC110738575	XM_021918972.1	Known_gene	1	1409440	1411888	NW_018743391.1	-	2449	1302	XP_021774664.1|2.0e-252|polygalacturonase-like [Chenopodium quinoa]
LOC110738572	XM_021918971.1	Known_gene	1	1332713	1333723	NW_018743391.1	-	1011	1011	XP_021774663.1|1.3e-193|uncharacterized protein LOC110738572 [Chenopodium quinoa]
LOC110738571	XM_021918969.1	Known_gene	1	1317519	1322754	NW_018743391.1	+	5236	3043	XP_021774661.1|0.0e+00|ATPase 11, plasma membrane-type-like [Chenopodium quinoa]
LOC110738570	XM_021918970.1	Known_gene	1	694058	700393	NW_018742244.1	+	6336	2275	XP_021774662.1|2.3e-304|probable serine/threonine-protein kinase At4g35230 [Chenopodium quinoa]
LOC110738569	XM_021918967.1	Known_gene	1	1245196	1245954	NW_018743391.1	+	759	759	XP_021774659.1|1.6e-148|uncharacterized protein LOC110738569 [Chenopodium quinoa]
LOC110738568	XM_021918966.1	Known_gene	1	1212503	1234645	NW_018743391.1	-	22143	606	XP_021774658.1|4.1e-115|serine carboxypeptidase-like 15 [Chenopodium quinoa]
LOC110738567	XM_021918965.1	Known_gene	1	1207324	1210146	NW_018743391.1	+	2823	2676	XP_021774657.1|0.0e+00|uncharacterized protein LOC110738567 [Chenopodium quinoa]
LOC110738566	XM_021918963.1	Known_gene	1	1191457	1199209	NW_018743391.1	-	7753	1698	XP_021774655.1|3.7e-283|serine carboxypeptidase-like 17 [Chenopodium quinoa]
LOC110738565	XM_021918962.1	Known_gene	1	1189512	1190804	NW_018743391.1	+	1293	1293	XP_021774654.1|1.4e-258|uncharacterized protein LOC110738565 [Chenopodium quinoa]
LOC110738564	XM_021918961.1	Known_gene	1	1000293	1002088	NW_018743391.1	+	1796	1579	XP_021774733.1|1.6e-182|wall-associated receptor kinase 2-like [Chenopodium quinoa]
LOC110738563	XM_021918964.1	Known_gene	1	676121	682754	NW_018742244.1	+	6634	3390	XP_021774656.1|0.0e+00|uncharacterized protein LOC110738563 [Chenopodium quinoa]
LOC110738561	XM_021918960.1	Known_gene	1	622891	624698	NW_018743391.1	-	1808	1374	XP_021774652.1|4.0e-275|uncharacterized protein LOC110738561 [Chenopodium quinoa]
LOC110738559	XM_021918958.1	Known_gene	1	454423	455930	NW_018743391.1	-	1508	1122	XP_021774650.1|1.2e-229|protein FAR1-RELATED SEQUENCE 5-like [Chenopodium quinoa]
LOC110738558	XM_021918957.1	Known_gene	1	398180	399881	NW_018743391.1	-	1702	1473	XP_021774649.1|1.2e-293|uncharacterized protein LOC110738558 [Chenopodium quinoa]
LOC110738557	XM_021918956.1	Known_gene	1	392762	397625	NW_018743391.1	-	4864	2081	XP_021774648.1|0.0e+00|uncharacterized protein LOC110738557 [Chenopodium quinoa]
LOC110738556	XM_021918959.1	Known_gene	1	639374	641055	NW_018742244.1	-	1682	1378	XP_021774651.1|5.7e-88|proline--tRNA ligase, cytoplasmic-like [Chenopodium quinoa]
LOC110738555	XM_021918955.1	Known_gene	1	380025	380826	NW_018743391.1	+	802	802	XP_021774647.1|2.9e-116|agamous-like MADS-box protein AGL80 [Chenopodium quinoa]
LOC110738554	XM_021918954.1	Known_gene	1	229080	230246	NW_018743391.1	+	1167	1167	XP_021774646.1|3.5e-232|uncharacterized protein LOC110738554 [Chenopodium quinoa]
LOC110738553	XM_021918953.1	Known_gene	1	192210	193961	NW_018743391.1	+	1752	1752	XP_021774645.1|0.0e+00|uncharacterized protein LOC110738553 [Chenopodium quinoa]
LOC110738552	XM_021918952.1	Known_gene	1	118512	121036	NW_018743391.1	+	2525	1868	XP_021774644.1|0.0e+00|uncharacterized protein LOC110738552 [Chenopodium quinoa]
LOC110738551	XM_021918951.1	Known_gene	1	3219970	3220980	NW_018743391.1	+	1011	932	XP_021734850.1|3.5e-126|tropomyosin-like [Chenopodium quinoa]
LOC110738549	XM_021918950.1	Known_gene	1	3082593	3084771	NW_018743391.1	-	2179	1317	XP_021774642.1|8.3e-206|11S globulin seed storage protein 2-like [Chenopodium quinoa]
LOC110738548	XM_021918948.1	Known_gene	1	3040283	3041785	NW_018743391.1	+	1503	958	XP_021774640.1|2.8e-78|uncharacterized protein LOC110738548 [Chenopodium quinoa]
LOC110738547	XM_021918947.1,XM_021918946.1	Known_gene	2	3024213	3027629	NW_018743391.1	+	3417	1432	XP_021774639.1|1.7e-159|B3 domain-containing protein REM9-like isoform X2 [Chenopodium quinoa]
LOC110738546	XM_021918949.1	Known_gene	1	651248	654622	NW_018742244.1	-	3375	1131	XP_021774641.1|2.7e-176|proline--tRNA ligase, cytoplasmic-like [Chenopodium quinoa]
LOC110738545	XM_021918945.1	Known_gene	1	2984876	2985685	NW_018743391.1	+	810	810	XP_021774637.1|2.2e-95|translationally-controlled tumor protein homolog [Chenopodium quinoa]
LOC110738544	XM_021918944.1	Known_gene	1	2767248	2768973	NW_018743391.1	+	1726	1726	XP_021774636.1|2.1e-257|protein SHORT-ROOT-like [Chenopodium quinoa]
LOC110738542	XM_021918943.1	Known_gene	1	2385035	2386585	NW_018743391.1	+	1551	1551	XP_021774635.1|3.8e-189|collagen alpha-1(IX) chain-like [Chenopodium quinoa]
LOC110738541	XM_021918968.1	Known_gene	1	17804481	17805605	NW_018742204.1	+	1125	1125	XP_021774660.1|7.6e-216|uncharacterized protein LOC110738541 [Chenopodium quinoa]
LOC110738539	XM_021918942.1	Known_gene	1	1678176	1678826	NW_018743391.1	-	651	569	XP_021774634.1|2.6e-95|uncharacterized protein LOC110738539 [Chenopodium quinoa]
LOC110738537	XM_021918941.1	Known_gene	1	1432700	1434969	NW_018743391.1	-	2270	1774	XP_021774633.1|1.0e-307|uncharacterized protein LOC110738537 [Chenopodium quinoa]
LOC110738536	XM_021918939.1	Known_gene	1	1406169	1408402	NW_018743391.1	+	2234	1406	XP_021774631.1|7.5e-229|polygalacturonase-like [Chenopodium quinoa]
LOC110738535	XM_021918938.1	Known_gene	1	1341406	1345055	NW_018743391.1	-	3650	2000	XP_021774630.1|5.5e-233|polygalacturonase-like [Chenopodium quinoa]
LOC110738534	XM_021918937.1	Known_gene	1	1323328	1326917	NW_018743391.1	-	3590	1577	XP_021774629.1|2.7e-227|polygalacturonase-like [Chenopodium quinoa]
LOC110738533	XM_021918940.1	Known_gene	1	634939	639076	NW_018742244.1	+	4138	1505	XP_021774632.1|1.2e-227|uncharacterized protein ycf39-like [Chenopodium quinoa]
LOC110738531	XM_021918936.1	Known_gene	1	469441	477455	NW_018743391.1	-	8015	1071	XP_021774628.1|4.4e-48|CDGSH iron-sulfur domain-containing protein NEET-like [Chenopodium quinoa]
LOC110738530	XM_021918935.1	Known_gene	1	343635	344875	NW_018743391.1	-	1241	1241	XP_021774627.1|1.5e-95|agamous-like MADS-box protein AGL80 [Chenopodium quinoa]
LOC110738529	XM_021918934.1	Known_gene	1	334698	335896	NW_018743391.1	+	1199	1199	XP_021774626.1|2.3e-109|agamous-like MADS-box protein AGL80 [Chenopodium quinoa]
LOC110738525	XM_021918932.1	Known_gene	1	24192	37304	NW_018743390.1	+	13113	1839	XP_021774624.1|0.0e+00|exocyst complex component EXO70A1-like [Chenopodium quinoa]
LOC110738524	XM_021918933.1	Known_gene	1	628764	634296	NW_018742244.1	+	5533	2807	XP_021774625.1|0.0e+00|uncharacterized protein At1g04910-like [Chenopodium quinoa]
LOC110738521	XM_021918931.1	Known_gene	1	5507063	5508235	NW_018743389.1	-	1173	1173	XP_021774623.1|1.2e-224|uncharacterized protein LOC110738521 [Chenopodium quinoa]
LOC110738520	XM_021918930.1	Known_gene	1	5446599	5447210	NW_018743389.1	-	612	612	XP_021774622.1|4.4e-117|RING-H2 finger protein ATL11-like [Chenopodium quinoa]
LOC110738519	XM_021918929.1	Known_gene	1	5324537	5324860	NW_018743389.1	+	324	324	XP_021774621.1|4.8e-54|uncharacterized protein LOC110738519 [Chenopodium quinoa]
LOC110738518	XM_021918928.1	Known_gene	1	5190055	5192058	NW_018743389.1	-	2004	1896	XP_021774620.1|0.0e+00|zinc finger MYM-type protein 1-like [Chenopodium quinoa]
LOC110738517	XM_021918927.1	Known_gene	1	4987681	4989273	NW_018743389.1	+	1593	1593	XP_021774619.1|0.0e+00|uncharacterized protein LOC110738517 [Chenopodium quinoa]
LOC110738516	BGI_novel_T005510,XM_021918926.1,BGI_novel_T005509	Known_gene	3	4970274	4971650	NW_018743389.1	-	1377	960	XP_021774618.1|3.3e-127|endochitinase At2g43590-like [Chenopodium quinoa]
LOC110738515	XM_021918925.1	Known_gene	1	4919145	4920398	NW_018743389.1	-	1254	1104	XP_021774617.1|1.6e-218|protein MAIN-LIKE 1-like [Chenopodium quinoa]
LOC110738513	XM_021918924.1	Known_gene	1	4905870	4906948	NW_018743389.1	+	1079	1005	XP_021774616.1|1.2e-201|uncharacterized protein LOC110738513 [Chenopodium quinoa]
LOC110738511	XM_021918923.1	Known_gene	1	4657375	4658232	NW_018743389.1	+	858	711	XP_021774615.1|1.4e-130|uncharacterized protein LOC110738511 [Chenopodium quinoa]
LOC110738509	XM_021918922.1	Known_gene	1	4576444	4579041	NW_018743389.1	+	2598	1764	XP_021774614.1|0.0e+00|protein FAR1-RELATED SEQUENCE 5-like [Chenopodium quinoa]
LOC110738508	XM_021918920.1	Known_gene	1	4506343	4507462	NW_018743389.1	+	1120	906	XP_021774612.1|4.4e-174|uncharacterized protein LOC110738508 [Chenopodium quinoa]
LOC110738507	XM_021918919.1	Known_gene	1	4401674	4404078	NW_018743389.1	-	2405	1971	XP_021774611.1|0.0e+00|uncharacterized protein LOC110738507 [Chenopodium quinoa]
LOC110738506	XM_021918918.1	Known_gene	1	4174795	4178991	NW_018743389.1	-	4197	726	XP_021774610.1|8.0e-142|uncharacterized protein LOC110738506 [Chenopodium quinoa]
LOC110738505	XM_021918916.1	Known_gene	1	4163838	4164692	NW_018743389.1	+	855	855	XP_021774608.1|2.0e-168|uncharacterized protein LOC110738505 [Chenopodium quinoa]
LOC110738504	XM_021918915.1	Known_gene	1	4054219	4069515	NW_018743389.1	+	15297	791	XP_021774607.1|4.9e-76|calcium/calmodulin-regulated receptor-like kinase 1 [Chenopodium quinoa]
LOC110738503	XM_021918914.1	Known_gene	1	30528	31064	NW_018743506.1	+	537	468	XP_021774606.1|7.1e-91|uncharacterized protein LOC110738503 [Chenopodium quinoa]
LOC110738502	XM_021918912.1	Known_gene	1	3690725	3691237	NW_018743389.1	+	513	513	XP_021774604.1|1.5e-105|myosin heavy chain IB-like [Chenopodium quinoa]
LOC110738501	XM_021918911.1	Known_gene	1	3576652	3577601	NW_018743389.1	+	950	897	XP_021774603.1|6.8e-175|F-box/kelch-repeat protein At3g06240-like [Chenopodium quinoa]
LOC110738500	XM_021918910.1	Known_gene	1	3552914	3560297	NW_018743389.1	-	7384	693	XP_021774602.1|1.0e-125|uncharacterized protein LOC110738500 [Chenopodium quinoa]
LOC110738499	XM_021918921.1,XM_021918917.1,XM_021918913.1	Known_gene	3	614547	623446	NW_018742244.1	-	8900	1989	XP_021774605.1|7.9e-224|glycerol-3-phosphate acyltransferase 3-like [Chenopodium quinoa]
LOC110738498	XM_021918909.1	Known_gene	1	3468311	3470089	NW_018743389.1	+	1779	1359	XP_021774601.1|1.7e-254|uncharacterized protein LOC110738498 [Chenopodium quinoa]
LOC110738497	XM_021918908.1	Known_gene	1	3395413	3398033	NW_018743389.1	-	2621	816	XP_021774600.1|1.6e-151|mediator of RNA polymerase II transcription subunit 1.1-like [Chenopodium quinoa]
LOC110738496	XM_021918907.1	Known_gene	1	3352512	3353006	NW_018743389.1	+	495	495	XP_021774599.1|5.9e-88|uncharacterized protein LOC110738496 [Chenopodium quinoa]
LOC110738495	XM_021918906.1	Known_gene	1	3219041	3220237	NW_018743389.1	+	1197	705	XP_021774598.1|4.9e-104|uncharacterized protein LOC110738495 [Chenopodium quinoa]
LOC110738494	XM_021918904.1	Known_gene	1	2953556	2956176	NW_018743389.1	-	2621	2097	XP_021774596.1|0.0e+00|uncharacterized protein LOC110738494 [Chenopodium quinoa]
LOC110738491	XM_021918905.1	Known_gene	1	602377	608533	NW_018742244.1	-	6157	2478	XP_021774597.1|0.0e+00|protein DETOXIFICATION 45, chloroplastic-like [Chenopodium quinoa]
LOC110738490	XM_021918903.1	Known_gene	1	5406470	5409399	NW_018743389.1	-	2930	2361	XP_021774595.1|1.4e-219|protein DMR6-LIKE OXYGENASE 1-like [Chenopodium quinoa]
LOC110738489	XM_021918902.1	Known_gene	1	5419079	5421113	NW_018743389.1	-	2035	2035	XP_021774594.1|0.0e+00|purine-uracil permease NCS1-like [Chenopodium quinoa]
LOC110738488	XM_021918901.1	Known_gene	1	5392946	5399476	NW_018743389.1	+	6531	983	XP_021774593.1|2.4e-96|N-terminal acetyltransferase B complex catalytic subunit NAA20-like [Chenopodium quinoa]
LOC110738487	XM_021918900.1	Known_gene	1	5385920	5389327	NW_018743389.1	-	3408	2345	XP_021720094.1|0.0e+00|protein MAIN-LIKE 1-like [Chenopodium quinoa]
LOC110738486	XM_021918899.1	Known_gene	1	5372035	5381163	NW_018743389.1	+	9129	5570	XP_021774591.1|2.7e-120|uncharacterized protein LOC110738486 [Chenopodium quinoa]
LOC110738485	XM_021918898.1	Known_gene	1	5233255	5240067	NW_018743389.1	-	6813	1196	XP_021774590.1|5.5e-164|alpha carbonic anhydrase 7-like [Chenopodium quinoa]
LOC110738484	XM_021918895.1	Known_gene	1	5201030	5204504	NW_018743389.1	+	3475	2002	XP_021774587.1|2.7e-216|caffeic acid 3-O-methyltransferase-like [Chenopodium quinoa]
LOC110738483	XM_021918894.1,BGI_novel_T005513	Known_gene	2	5166866	5173371	NW_018743389.1	+	6506	2694	XP_021774586.1|0.0e+00|carotene epsilon-monooxygenase, chloroplastic-like [Chenopodium quinoa]
LOC110738482	XM_021918893.1	Known_gene	1	5130310	5151126	NW_018743389.1	-	20817	5080	XP_021774585.1|0.0e+00|uncharacterized protein LOC110738482 [Chenopodium quinoa]
LOC110738481	XM_021918897.1	Known_gene	1	588146	591425	NW_018742244.1	-	3280	1877	XP_021774589.1|2.0e-306|sodium transporter HKT1-like [Chenopodium quinoa]
LOC110738480	XM_021918892.1	Known_gene	1	5118968	5128350	NW_018743389.1	-	9383	1637	XP_021774584.1|4.6e-246|probable pectinesterase 15 [Chenopodium quinoa]
LOC110738479	BGI_novel_T005511,XM_021918891.1,BGI_novel_T005512	Known_gene	3	5108758	5118960	NW_018743389.1	+	10203	3673	XP_006452377.1|0.0e+00|aconitate hydratase, cytoplasmic [Citrus clementina]
LOC110738478	XM_021918889.1,XM_021918888.1,XM_021918887.1,XM_021918890.1	Known_gene	4	5061253	5072740	NW_018743389.1	+	11488	4036	XP_010671129.1|6.8e-300|PREDICTED: pentatricopeptide repeat-containing protein At5g04780 [Beta vulgaris subsp. vulgaris]
LOC110738477	XM_021918886.1	Known_gene	1	5050249	5059651	NW_018743389.1	-	9403	3653	XP_011095404.1|0.0e+00|putative aconitate hydratase, cytoplasmic [Sesamum indicum]
LOC110738476	XM_021918885.1	Known_gene	1	5023999	5024599	NW_018743389.1	-	601	601	XP_021730030.1|8.3e-68|probable histone H2B.1 [Chenopodium quinoa]
LOC110738475	XM_021918883.1	Known_gene	1	5014370	5016913	NW_018743389.1	-	2544	1325	XP_021774575.1|8.4e-105|uncharacterized protein LOC110738475 [Chenopodium quinoa]
LOC110738474	BGI_novel_T005507,XM_021918882.1,BGI_novel_T005508	Known_gene	3	4941604	4946489	NW_018743389.1	+	4886	3824	XP_021774574.1|4.4e-159|uncharacterized protein LOC110738474 [Chenopodium quinoa]
LOC110738473	XM_021918884.1	Known_gene	1	574398	577855	NW_018742244.1	+	3458	1857	KNA14954.1|1.3e-281|hypothetical protein SOVF_102690 [Spinacia oleracea]
LOC110738472	XM_021918881.1	Known_gene	1	4770668	4783298	NW_018743389.1	-	12631	2916	XP_021774573.1|0.0e+00|protein fluG-like [Chenopodium quinoa]
LOC110738471	XM_021918880.1	Known_gene	1	4745479	4762017	NW_018743389.1	+	16539	7281	XP_021769764.1|0.0e+00|uncharacterized protein LOC110734016 [Chenopodium quinoa]
LOC110738470	XM_021918879.1	Known_gene	1	4669336	4673369	NW_018743389.1	-	4034	989	XP_021774571.1|2.1e-113|tankyrase-2-like [Chenopodium quinoa]
LOC110738469	XM_021918878.1	Known_gene	1	4675376	4692706	NW_018743389.1	-	17331	6192	XP_021774570.1|0.0e+00|rRNA biogenesis protein RRP5-like [Chenopodium quinoa]
LOC110738468	XM_021918877.1	Known_gene	1	4599078	4621542	NW_018743389.1	-	22465	2801	XP_021774569.1|0.0e+00|mRNA-capping enzyme-like [Chenopodium quinoa]
LOC110738467	XM_021918876.1	Known_gene	1	4568833	4575392	NW_018743389.1	+	6560	1529	XP_021774568.1|3.5e-115|ras-related protein RABC2a-like [Chenopodium quinoa]
LOC110738466	XM_021918875.1	Known_gene	1	4549167	4555957	NW_018743389.1	+	6791	1301	XP_010696318.1|4.4e-183|PREDICTED: splicing factor 3A subunit 2 [Beta vulgaris subsp. vulgaris]
LOC110738465	XM_021918873.1,XM_021918872.1,XM_021918871.1,BGI_novel_T005504	Known_gene	4	4518468	4529391	NW_018743389.1	+	10924	3196	XP_021774563.1|0.0e+00|phosphatidylinositol 4-phosphate 5-kinase 9-like isoform X1 [Chenopodium quinoa]
LOC110738464	XM_021918874.1	Known_gene	1	577988	581498	NW_018742244.1	-	3511	1802	XP_021774566.1|8.5e-302|probable cation transporter HKT6 [Chenopodium quinoa]
LOC110738463	XM_021918870.1	Known_gene	1	4489592	4496734	NW_018743389.1	+	7143	1066	XP_021774562.1|9.4e-107|uncharacterized protein LOC110738463 [Chenopodium quinoa]
LOC110738462	BGI_novel_T005499,BGI_novel_T005500,BGI_novel_T005501,BGI_novel_T005502,BGI_novel_T005503,BGI_novel_T005498,XM_021918869.1	Known_gene	7	4446477	4458013	NW_018743389.1	-	11537	3490	XP_021774561.1|1.7e-132|uncharacterized protein LOC110738462 [Chenopodium quinoa]
LOC110738461	XM_021918868.1	Known_gene	1	4449056	4458013	NW_018743389.1	-	8958	1476	XP_021774560.1|3.7e-194|uncharacterized protein LOC110738461 [Chenopodium quinoa]
LOC110738460	XM_021918867.1,BGI_novel_T005496,BGI_novel_T005495	Known_gene	3	4395403	4407773	NW_018743389.1	+	12371	2120	XP_021730235.1|4.0e-125|probable ubiquitin-like-specific protease 2A [Chenopodium quinoa]
LOC110738459	XM_021918866.1	Known_gene	1	4296512	4300177	NW_018743389.1	+	3666	1173	XP_021774558.1|2.1e-139|probable aquaporin TIP1-1 [Chenopodium quinoa]
LOC110738457	XM_021918865.1	Known_gene	1	4219259	4221239	NW_018743389.1	-	1981	1981	XP_021774557.1|2.2e-189|zinc finger protein ZAT5-like [Chenopodium quinoa]
LOC110738456	XM_021918863.1	Known_gene	1	4195026	4197296	NW_018743389.1	-	2271	1207	XP_021774555.1|8.6e-157|expansin-A32-like [Chenopodium quinoa]
LOC110738455	XM_021918862.1	Known_gene	1	4188092	4195145	NW_018743389.1	+	7054	3591	XP_021774554.1|0.0e+00|WD repeat-containing protein 3-like [Chenopodium quinoa]
LOC110738454	XM_021918861.1	Known_gene	1	4029542	4033087	NW_018743389.1	+	3546	1137	XP_021774553.1|1.3e-159|alpha carbonic anhydrase 7-like [Chenopodium quinoa]
LOC110738453	XM_021918864.1	Known_gene	1	561934	566584	NW_018742244.1	+	4651	1665	XP_021774556.1|1.2e-204|isocitrate dehydrogenase [NAD] regulatory subunit 1, mitochondrial-like [Chenopodium quinoa]
LOC110738452	XM_021918896.1	Known_gene	1	17785037	17787283	NW_018742204.1	-	2247	1680	XP_021774588.1|7.0e-274|F-box/FBD/LRR-repeat protein At1g13570-like [Chenopodium quinoa]
LOC110738451	XM_021918860.1	Known_gene	1	3979488	3984947	NW_018743389.1	+	5460	1166	XP_021774552.1|2.3e-162|alpha carbonic anhydrase 7-like [Chenopodium quinoa]
LOC110738450	XM_021918859.1	Known_gene	1	3943464	3944518	NW_018743389.1	+	1055	929	XP_021774551.1|8.8e-101|small heat shock protein, chloroplastic-like [Chenopodium quinoa]
LOC110738449	BGI_novel_T005492,BGI_novel_T005490,BGI_novel_T005491,XM_021918858.1,BGI_novel_T005493	Known_gene	5	3939862	3941578	NW_018743389.1	-	1717	1221	XP_021774550.1|7.8e-49|aldehyde dehydrogenase family 2 member B4, mitochondrial-like [Chenopodium quinoa]
LOC110738448	XM_021918857.1	Known_gene	1	3870471	3881783	NW_018743389.1	-	11313	2703	XP_021753653.1|9.5e-281|probable pectate lyase 12 [Chenopodium quinoa]
LOC110738447	XM_021918856.1	Known_gene	1	3819527	3825826	NW_018743389.1	+	6300	984	XP_021774548.1|5.7e-66|uncharacterized protein LOC110738447 [Chenopodium quinoa]
LOC110738446	XM_021918855.1	Known_gene	1	3806316	3807276	NW_018743389.1	+	961	880	XP_021769738.1|5.1e-151|serine/threonine-protein phosphatase 7 long form homolog [Chenopodium quinoa]
LOC110738445	XM_021918854.1	Known_gene	1	3794525	3802467	NW_018743389.1	+	7943	2803	XP_021753656.1|8.3e-288|serine/threonine protein phosphatase 2A 57 kDa regulatory subunit B' beta isoform-like [Chenopodium quinoa]
LOC110738443	XM_021918852.1	Known_gene	1	3616659	3621279	NW_018743389.1	+	4621	1612	XP_021774544.1|1.2e-182|p21-activated protein kinase-interacting protein 1-like [Chenopodium quinoa]
LOC110738442	XM_021918851.1	Known_gene	1	3589299	3595583	NW_018743389.1	-	6285	2290	XP_021743861.1|5.1e-158|glycine-rich RNA-binding protein RZ1C-like [Chenopodium quinoa]
LOC110738441	BGI_novel_T000542,XM_021918853.1	Known_gene	2	557065	561417	NW_018742244.1	+	4353	4223	XP_021774545.1|0.0e+00|SEC1 family transport protein SLY1-like [Chenopodium quinoa]
LOC110738440	BGI_novel_T005488,XM_021918850.1	Known_gene	2	3583385	3587167	NW_018743389.1	+	3783	2552	XP_021774542.1|2.8e-242|ACT domain-containing protein ACR10-like [Chenopodium quinoa]
LOC110738439	XM_021918849.1	Known_gene	1	3571305	3575660	NW_018743389.1	+	4356	757	XP_021774541.1|7.2e-69|dual specificity phosphatase Cdc25-like [Chenopodium quinoa]
LOC110738438	XM_021918848.1	Known_gene	1	3514643	3538858	NW_018743389.1	-	24216	3898	XP_021774540.1|0.0e+00|E3 ubiquitin-protein ligase RFWD3-like [Chenopodium quinoa]
LOC110738437	XM_021918847.1	Known_gene	1	3494587	3503768	NW_018743389.1	+	9182	1450	XP_021774539.1|3.6e-186|probable xyloglucan endotransglucosylase/hydrolase protein 32 [Chenopodium quinoa]
LOC110738434	BGI_novel_T005487,XM_021918845.1,XM_021918846.1,XM_021918843.1	Known_gene	4	3401933	3413645	NW_018743389.1	-	11713	2145	XP_021774535.1|7.0e-295|FAD synthase-like [Chenopodium quinoa]
LOC110738433	XM_021918841.1,XM_021918842.1,XM_021918840.1	Known_gene	3	3377471	3386289	NW_018743389.1	+	8819	2089	XP_021774533.1|3.0e-274|uncharacterized protein LOC110738433 isoform X2 [Chenopodium quinoa]
LOC110738432	XM_021918844.1	Known_gene	1	549168	551115	NW_018742244.1	+	1948	943	XP_021774536.1|4.6e-105|jasmonate-induced protein homolog [Chenopodium quinoa]
LOC110738430	XM_021918839.1	Known_gene	1	3310840	3333240	NW_018743389.1	+	22401	1217	XP_021774531.1|8.7e-141|exosome complex component RRP41-like [Chenopodium quinoa]
LOC110738429	XM_021918838.1	Known_gene	1	3287127	3294706	NW_018743389.1	+	7580	2780	XP_021774530.1|0.0e+00|cell division cycle protein 48 homolog [Chenopodium quinoa]
LOC110738428	XM_021918835.1,XM_021918837.1,XM_021918834.1,BGI_novel_T005484,BGI_novel_T005485,XM_021918836.1	Known_gene	6	3205714	3214058	NW_018743389.1	+	8345	3150	XP_021774528.1|0.0e+00|TSL-kinase interacting protein 1-like isoform X3 [Chenopodium quinoa]
LOC110738427	XM_021918833.1	Known_gene	1	3134978	3136972	NW_018743389.1	-	1995	946	XP_021774525.1|6.8e-109|DNA polymerase zeta processivity subunit-like [Chenopodium quinoa]
LOC110738426	XM_021918831.1	Known_gene	1	3109040	3113383	NW_018743389.1	+	4344	2985	XP_021717047.1|0.0e+00|elongation factor 2-like [Chenopodium quinoa]
LOC110738424	XM_021918830.1	Known_gene	1	2758272	2767353	NW_018743389.1	-	9082	1707	XP_021774522.1|1.2e-209|transcription factor JUNGBRUNNEN 1-like [Chenopodium quinoa]
LOC110738423	XM_021918832.1,BGI_novel_T000541	Known_gene	2	546253	548728	NW_018742244.1	+	2476	1572	XP_021774524.1|4.3e-116|jasmonate-induced protein homolog [Chenopodium quinoa]
LOC110738422	XM_021918829.1	Known_gene	1	2739795	2744322	NW_018743389.1	+	4528	2985	XP_021717047.1|0.0e+00|elongation factor 2-like [Chenopodium quinoa]
LOC110738421	BGI_novel_T005477,XM_021918821.1,XM_021918824.1,BGI_novel_T005474,BGI_novel_T005478,BGI_novel_T005475,XM_021918828.1,XM_021918823.1,BGI_novel_T005481,BGI_novel_T005476,BGI_novel_T005479,XM_021918826.1,BGI_novel_T005483,XM_021918825.1,BGI_novel_T005480,XM_021918827.1,XM_021918822.1,BGI_novel_T005482	Known_gene	18	2586341	2591156	NW_018743389.1	+	4816	2192	XP_021774513.1|3.3e-119|uncharacterized protein LOC110738421 [Chenopodium quinoa]
LOC110738420	XM_021918818.1,XM_021918820.1	Known_gene	2	2340203	2347710	NW_018743389.1	+	7508	1236	XP_021774512.1|4.7e-121|dihydroceramide fatty acyl 2-hydroxylase FAH1-like isoform X2 [Chenopodium quinoa]
LOC110738419	XM_021918819.1	Known_gene	1	518060	521490	NW_018742244.1	-	3431	1067	XP_021774511.1|1.3e-124|uncharacterized protein LOC110738419 [Chenopodium quinoa]
LOC110738418	XM_021918817.1,XM_021918816.1,XM_021918813.1,BGI_novel_T005473,XM_021918814.1,XM_021918815.1	Known_gene	6	2181600	2208591	NW_018743389.1	-	26992	2356	XP_021774507.1|0.0e+00|zinc finger CCCH domain-containing protein 37-like isoform X3 [Chenopodium quinoa]
LOC110738416	XM_021918812.1	Known_gene	1	2074345	2081718	NW_018743389.1	+	7374	1595	XP_021774504.1|5.8e-185|uncharacterized protein At4g15545-like [Chenopodium quinoa]
LOC110738415	XM_021918809.1,XM_021918811.1,XM_021918810.1	Known_gene	3	2050830	2057285	NW_018743389.1	-	6456	1426	XP_021774501.1|1.1e-176|uncharacterized protein LOC110738415 isoform X1 [Chenopodium quinoa]
LOC110738414	BGI_novel_T005472,XM_021918808.1	Known_gene	2	2045423	2057285	NW_018743389.1	-	11863	3708	XP_021774500.1|0.0e+00|uncharacterized protein LOC110738414 [Chenopodium quinoa]
LOC110738413	XM_021918807.1	Known_gene	1	516179	517453	NW_018742244.1	-	1275	1275	XP_021774499.1|8.5e-171|proteoglycan 4-like [Chenopodium quinoa]
LOC110738412	XM_021918804.1,XM_021918803.1,BGI_novel_T005471,XM_021918802.1,XM_021918805.1,XM_021918801.1,BGI_novel_T005470,XM_021918806.1,BGI_novel_T005469	Known_gene	9	1963158	1969285	NW_018743389.1	+	6128	3215	XP_021867037.1|0.0e+00|probable potassium transporter 13 [Spinacia oleracea]
LOC110738410	XM_021918800.1	Known_gene	1	1691279	1709243	NW_018743389.1	+	17965	2848	XP_021774492.1|0.0e+00|nucleolar complex protein 3 homolog [Chenopodium quinoa]
LOC110738409	XM_021918799.1	Known_gene	1	1679853	1681436	NW_018743389.1	-	1584	699	PON62349.1|1.4e-39|Ribosomal protein [Parasponia andersonii]
LOC110738408	XM_021918798.1	Known_gene	1	1410456	1414407	NW_018743389.1	-	3952	980	XP_021774490.1|2.7e-100|thioredoxin-like protein CITRX, chloroplastic [Chenopodium quinoa]
LOC110738407	XM_021918797.1	Known_gene	1	1354596	1369221	NW_018743389.1	-	14626	2259	XP_021774489.1|2.1e-103|nudix hydrolase 16, mitochondrial-like [Chenopodium quinoa]
LOC110738406	XM_021918796.1	Known_gene	1	1335144	1354430	NW_018743389.1	+	19287	6049	XP_021752899.1|0.0e+00|E3 ubiquitin-protein ligase KEG-like [Chenopodium quinoa]
LOC110738405	XM_021918794.1	Known_gene	1	1300045	1303197	NW_018743389.1	+	3153	2162	XP_021774486.1|8.6e-192|trihelix transcription factor ASIL2-like [Chenopodium quinoa]
LOC110738404	XM_021918793.1	Known_gene	1	1292363	1293970	NW_018743389.1	+	1608	1608	XP_021774485.1|2.6e-177|U-box domain-containing protein 1 [Chenopodium quinoa]
LOC110738403	XM_021918792.1	Known_gene	1	1278143	1280216	NW_018743389.1	+	2074	1514	XP_021774484.1|2.0e-211|putative disease resistance RPP13-like protein 1 [Chenopodium quinoa]
LOC110738402	XM_021918795.1	Known_gene	1	505257	508698	NW_018742244.1	-	3442	1055	XP_021774487.1|2.1e-90|uncharacterized protein LOC110738402 [Chenopodium quinoa]
LOC110738401	XM_021918791.1,BGI_novel_T005462,BGI_novel_T005465,XM_021918783.1,XM_021918782.1,XM_021918780.1,XM_021918789.1,XM_021918785.1,BGI_novel_T005461,BGI_novel_T005464,BGI_novel_T005463,XM_021918790.1,XM_021918788.1,XM_021918784.1,XM_021918786.1	Known_gene	15	1280458	1289541	NW_018743389.1	+	9084	4863	XP_021774476.1|0.0e+00|putative disease resistance protein At3g14460 isoform X2 [Chenopodium quinoa]
LOC110738400	XM_021918779.1	Known_gene	1	1270432	1272660	NW_018743389.1	+	2229	2229	XP_021774471.1|5.3e-168|uncharacterized protein At3g28850-like [Chenopodium quinoa]
LOC110738398	XM_021918778.1,BGI_novel_T005459	Known_gene	2	1251348	1264592	NW_018743389.1	-	13245	2834	XP_021774470.1|0.0e+00|flowering time control protein FY-like [Chenopodium quinoa]
LOC110738397	XM_021918777.1	Known_gene	1	1237216	1241643	NW_018743389.1	+	4428	548	XP_021750496.1|1.9e-34|reactive oxygen species modulator 1-like [Chenopodium quinoa]
LOC110738396	XM_021918776.1	Known_gene	1	1226298	1233307	NW_018743389.1	-	7010	4434	XP_021774468.1|0.0e+00|F-box protein At3g54460-like [Chenopodium quinoa]
LOC110738395	XM_021918775.1	Known_gene	1	1202536	1216185	NW_018743389.1	-	13650	4425	XP_021774467.1|0.0e+00|uncharacterized protein LOC110738395 [Chenopodium quinoa]
LOC110738392	XM_021918773.1	Known_gene	1	1019622	1022126	NW_018743389.1	-	2505	830	XP_021774465.1|7.6e-96|two-component response regulator ORR9-like [Chenopodium quinoa]
LOC110738391	XM_021918781.1,XM_021918774.1	Known_gene	2	497022	501251	NW_018742244.1	-	4230	3138	XP_021774466.1|0.0e+00|protein FAR1-RELATED SEQUENCE 5-like isoform X1 [Chenopodium quinoa]
LOC110738390	XM_021918772.1	Known_gene	1	1010939	1012454	NW_018743389.1	-	1516	1236	XP_021774464.1|9.6e-87|uncharacterized protein LOC110738390 [Chenopodium quinoa]
LOC110738389	XM_021918771.1	Known_gene	1	970105	971382	NW_018743389.1	+	1278	1162	XP_021752926.1|4.8e-88|two-component response regulator ORR10-like [Chenopodium quinoa]
LOC110738388	XM_021918770.1	Known_gene	1	944921	950199	NW_018743389.1	+	5279	1500	XP_021774462.1|6.1e-144|putative B3 domain-containing protein REM15 [Chenopodium quinoa]
LOC110738387	XM_021918769.1	Known_gene	1	930610	944353	NW_018743389.1	+	13744	2827	XP_021774461.1|0.0e+00|protein NRT1/ PTR FAMILY 5.4-like [Chenopodium quinoa]
LOC110738386	XM_021918768.1	Known_gene	1	878708	899938	NW_018743389.1	-	21231	7206	XP_021774460.1|0.0e+00|LOW QUALITY PROTEIN: DNA-directed RNA polymerase V subunit 1-like [Chenopodium quinoa]
LOC110738385	XM_021918767.1	Known_gene	1	850217	864360	NW_018743389.1	-	14144	3884	XP_021774459.1|0.0e+00|uncharacterized protein LOC110738385 [Chenopodium quinoa]
LOC110738383	XM_021918765.1,XM_021918764.1	Known_gene	2	751243	757455	NW_018743389.1	-	6213	1811	XP_021774456.1|1.3e-233|uncharacterized protein LOC110738383 isoform X1 [Chenopodium quinoa]
LOC110738382	XM_021918763.1	Known_gene	1	744208	750715	NW_018743389.1	+	6508	4664	XP_021774455.1|0.0e+00|phosphatidylinositol 4-phosphate 5-kinase 6-like [Chenopodium quinoa]
LOC110738381	XM_021918766.1	Known_gene	1	494850	496890	NW_018742244.1	+	2041	1173	XP_021715703.1|5.7e-198|uncharacterized protein LOC110683621 [Chenopodium quinoa]
LOC110738380	XM_021918762.1	Known_gene	1	740198	742736	NW_018743389.1	-	2539	1631	XP_021774454.1|4.2e-106|NAD(P)H:quinone oxidoreductase-like [Chenopodium quinoa]
LOC110738379	XM_021918761.1,XM_021918760.1	Known_gene	2	736473	740178	NW_018743389.1	+	3706	3303	XP_021774452.1|9.9e-160|uncharacterized protein LOC110738379 [Chenopodium quinoa]
LOC110738378	XM_021918759.1	Known_gene	1	730585	735445	NW_018743389.1	-	4861	940	XP_021774451.1|4.4e-108|NADPH:quinone oxidoreductase [Chenopodium quinoa]
LOC110738377	XM_021918758.1,XM_021918757.1	Known_gene	2	723670	730218	NW_018743389.1	-	6549	2283	XP_021774450.1|1.5e-223|hydroxyproline O-arabinosyltransferase 3-like isoform X2 [Chenopodium quinoa]
LOC110738375	BGI_novel_T005447,XM_021918756.1	Known_gene	2	700313	705178	NW_018743389.1	-	4866	3466	XP_021774448.1|4.2e-254|aspartyl protease AED3-like [Chenopodium quinoa]
LOC110738374	XM_021918753.1,BGI_novel_T005446,XM_021918754.1	Known_gene	3	696776	700756	NW_018743389.1	+	3981	2206	XP_021774445.1|0.0e+00|uncharacterized protein LOC110738374 [Chenopodium quinoa]
LOC110738373	XM_021918752.1,BGI_novel_T005445,XM_021918751.1	Known_gene	3	688719	695169	NW_018743389.1	+	6451	5156	XP_021774443.1|0.0e+00|putative disease resistance protein At3g14460 isoform X1 [Chenopodium quinoa]
LOC110738372	XM_021918755.1	Known_gene	1	477005	484266	NW_018742244.1	+	7262	2376	XP_021774447.1|0.0e+00|ubiquitin domain-containing protein DSK2b-like [Chenopodium quinoa]
LOC110738371	XM_021918787.1	Known_gene	1	17780672	17782440	NW_018742204.1	-	1769	1510	XP_021774479.1|1.7e-223|F-box/FBD/LRR-repeat protein At1g13570-like [Chenopodium quinoa]
LOC110738370	XM_021918749.1,XM_021918750.1	Known_gene	2	675340	683601	NW_018743389.1	+	8262	2675	XP_021774441.1|3.4e-299|probable ADP-ribosylation factor GTPase-activating protein AGD11 [Chenopodium quinoa]
LOC110738369	XM_021918748.1	Known_gene	1	658767	663493	NW_018743389.1	+	4727	1738	XP_021854348.1|7.2e-173|E3 ubiquitin-protein ligase SINAT5-like [Spinacia oleracea]
LOC110738368	XM_021918747.1	Known_gene	1	665402	669547	NW_018743389.1	-	4146	1917	XP_021774439.1|3.7e-271|uridine 5'-monophosphate synthase-like [Chenopodium quinoa]
LOC110738367	XM_021918746.1	Known_gene	1	635377	639811	NW_018743389.1	+	4435	897	XP_021774438.1|4.3e-121|DNA-directed RNA polymerase V subunit 5C-like [Chenopodium quinoa]
LOC110738366	XM_021918745.1	Known_gene	1	623255	627509	NW_018743389.1	-	4255	1331	XP_021774437.1|2.9e-158|F-box protein SKIP5-like [Chenopodium quinoa]
LOC110738365	XM_021918742.1,XM_021918744.1	Known_gene	2	575794	593581	NW_018743389.1	+	17788	2987	XP_021774436.1|0.0e+00|protein LNK2-like isoform X2 [Chenopodium quinoa]
LOC110738364	XM_021918741.1	Known_gene	1	532115	535239	NW_018743389.1	-	3125	1350	XP_021774433.1|3.0e-174|annexin-like protein RJ4 [Chenopodium quinoa]
LOC110738363	XM_021918740.1	Known_gene	1	528578	531020	NW_018743389.1	-	2443	1298	XP_021774432.1|1.0e-176|annexin-like protein RJ4 [Chenopodium quinoa]
LOC110738362	XM_021918743.1	Known_gene	1	473434	474503	NW_018742244.1	+	1070	1070	TYI85866.1|5.0e-76|hypothetical protein E1A91_D04G026100v1, partial [Gossypium mustelinum]
LOC110738361	XM_021918739.1	Known_gene	1	523300	527260	NW_018743389.1	+	3961	1218	XP_021774431.1|2.6e-177|annexin D4-like [Chenopodium quinoa]
LOC110738360	XM_021918738.1,XM_021918737.1	Known_gene	2	507273	512718	NW_018743389.1	-	5446	1406	XP_021774429.1|7.6e-197|annexin D3-like isoform X1 [Chenopodium quinoa]
LOC110738359	XM_021918736.1,BGI_novel_T005444,BGI_novel_T005443	Known_gene	3	500285	506453	NW_018743389.1	+	6169	2799	XP_021774428.1|0.0e+00|integrator complex subunit 9-like [Chenopodium quinoa]
LOC110738358	XM_021918732.1,XM_021918731.1,XM_021918734.1,XM_021918735.1,XM_021918733.1	Known_gene	5	480599	496223	NW_018743389.1	+	15625	3736	XP_021774423.1|0.0e+00|CSC1-like protein At3g54510 isoform X1 [Chenopodium quinoa]
LOC110738357	XM_021918729.1	Known_gene	1	465598	476296	NW_018743389.1	+	10699	5297	XP_021774421.1|0.0e+00|putative disease resistance RPP13-like protein 1 [Chenopodium quinoa]
LOC110738356	XM_021918728.1,XM_021918727.1	Known_gene	2	459354	464125	NW_018743389.1	-	4772	3292	XP_021762210.1|2.2e-223|putative disease resistance protein At3g14460 [Chenopodium quinoa]
LOC110738355	XM_021918730.1	Known_gene	1	467137	470999	NW_018742244.1	+	3863	943	XP_021774422.1|4.1e-90|sorcin-like [Chenopodium quinoa]
LOC110738354	XM_021918726.1,XM_021918725.1	Known_gene	2	444882	451518	NW_018743389.1	+	6637	1599	XP_021774417.1|4.0e-210|diaminopimelate epimerase, chloroplastic-like [Chenopodium quinoa]
LOC110738353	XM_021918724.1	Known_gene	1	441968	443635	NW_018743389.1	+	1668	841	XP_021774416.1|1.1e-94|basic blue protein-like [Chenopodium quinoa]
LOC110738351	XM_021918723.1	Known_gene	1	432690	437158	NW_018743389.1	-	4469	3056	XP_021774415.1|0.0e+00|U-box domain-containing protein 43-like [Chenopodium quinoa]
LOC110738350	XM_021918722.1	Known_gene	1	410958	417575	NW_018743389.1	-	6618	1274	XP_021774414.1|1.9e-167|U3 small nucleolar ribonucleoprotein protein IMP4-like [Chenopodium quinoa]
LOC110738349	BGI_novel_T005442,XM_021918721.1,BGI_novel_T005441	Known_gene	3	360839	365014	NW_018743389.1	+	4176	1460	XP_021774413.1|4.2e-121|uncharacterized protein LOC110738349 [Chenopodium quinoa]
LOC110738348	XM_021918720.1	Known_gene	1	365404	368350	NW_018743389.1	-	2947	2619	XP_021774412.1|0.0e+00|RNA polymerase-associated protein LEO1-like [Chenopodium quinoa]
LOC110738347	XM_021918718.1	Known_gene	1	397947	409772	NW_018743389.1	+	11826	5215	XP_021774410.1|0.0e+00|intron-binding protein aquarius-like [Chenopodium quinoa]
LOC110738346	XM_021918717.1	Known_gene	1	345551	349881	NW_018743389.1	-	4331	1309	XP_021774409.1|8.8e-224|protein trichome birefringence-like 38 [Chenopodium quinoa]
LOC110738345	XM_021918716.1	Known_gene	1	333632	338801	NW_018743389.1	-	5170	1956	XP_021774408.1|1.1e-249|protein trichome birefringence-like 38 [Chenopodium quinoa]
LOC110738344	XM_021918719.1	Known_gene	1	450270	461886	NW_018742244.1	+	11617	5766	XP_021774411.1|0.0e+00|histone-lysine N-methyltransferase ATXR7-like [Chenopodium quinoa]
LOC110738343	XM_021918715.1,BGI_novel_T005440,XM_021918713.1,BGI_novel_T005439,XM_021918714.1	Known_gene	5	307135	314220	NW_018743389.1	-	7086	4069	XP_021774405.1|3.7e-238|probable folate-biopterin transporter 4 isoform X1 [Chenopodium quinoa]
LOC110738342	XM_021918712.1	Known_gene	1	243311	244767	NW_018743389.1	-	1457	1457	XP_021774404.1|1.6e-101|dirigent protein 22-like [Chenopodium quinoa]
LOC110738341	XM_021918710.1,BGI_novel_T005437	Known_gene	2	137234	157020	NW_018743389.1	-	19787	2627	XP_021774402.1|0.0e+00|probable inactive purple acid phosphatase 27 [Chenopodium quinoa]
LOC110738340	XM_021918711.1	Known_gene	1	437772	441084	NW_018742244.1	+	3313	895	XP_021774403.1|4.2e-68|small nuclear ribonucleoprotein SmD3b-like [Chenopodium quinoa]
LOC110738339	BGI_novel_T005435,BGI_novel_T005436,XM_021918709.1,XM_021918705.1,XM_021918708.1,XM_021918707.1,XM_021918706.1,BGI_novel_T005434	Known_gene	8	115170	130082	NW_018743389.1	+	14913	2703	XP_021774398.1|0.0e+00|crossover junction endonuclease MUS81-like isoform X2 [Chenopodium quinoa]
LOC110738338	XM_021918704.1,XM_021918703.1	Known_gene	2	97204	101907	NW_018743389.1	-	4704	913	XP_021774395.1|2.7e-62|uncharacterized protein LOC110738338 isoform X1 [Chenopodium quinoa]
LOC110738337	XM_021918702.1	Known_gene	1	86636	89232	NW_018743389.1	-	2597	2597	XP_021774394.1|1.9e-246|protein JINGUBANG-like [Chenopodium quinoa]
LOC110738336	XM_021918701.1	Known_gene	1	69002	76903	NW_018743389.1	+	7902	2303	XP_021774393.1|1.6e-308|glycosyltransferase-like KOBITO 1 [Chenopodium quinoa]
LOC110738335	XM_021918700.1	Known_gene	1	49213	53249	NW_018743389.1	-	4037	1953	XP_021774392.1|2.7e-67|uncharacterized protein LOC110738335 [Chenopodium quinoa]
LOC110738334	XM_021918699.1,XM_021918697.1,XM_021918696.1	Known_gene	3	44409	49127	NW_018743389.1	+	4719	3275	XP_021774388.1|0.0e+00|pentatricopeptide repeat-containing protein At4g20740-like [Chenopodium quinoa]
LOC110738333	XM_021918694.1,XM_021918695.1	Known_gene	2	23408	27610	NW_018743389.1	-	4203	2239	XP_021774387.1|4.8e-254|uncharacterized protein LOC110738333 isoform X2 [Chenopodium quinoa]
LOC110738332	XM_021918698.1	Known_gene	1	435444	436703	NW_018742244.1	+	1260	1260	XP_021774390.1|6.8e-173|periaxin-like [Chenopodium quinoa]
LOC110738331	XM_021918693.1	Known_gene	1	2912549	2913607	NW_018743389.1	+	1059	1059	XP_021774385.1|1.4e-203|uncharacterized protein LOC110738331 [Chenopodium quinoa]
LOC110738330	XM_021918692.1	Known_gene	1	2711718	2713637	NW_018743389.1	-	1920	1728	XP_021774384.1|0.0e+00|uncharacterized protein LOC110738330 [Chenopodium quinoa]
LOC110738329	XM_021918691.1	Known_gene	1	2631761	2632138	NW_018743389.1	+	378	378	XP_021774383.1|2.9e-66|uncharacterized protein LOC110738329 [Chenopodium quinoa]
LOC110738328	XM_021918690.1	Known_gene	1	2626564	2627052	NW_018743389.1	+	489	489	XP_021774382.1|6.5e-87|uncharacterized protein LOC110738328 [Chenopodium quinoa]
LOC110738327	XM_021918689.1	Known_gene	1	2376585	2377124	NW_018743389.1	+	540	540	XP_021774381.1|6.9e-98|glutamic acid-rich protein-like [Chenopodium quinoa]
LOC110738326	XM_021918687.1	Known_gene	1	1959308	1961368	NW_018743389.1	+	2061	1734	XP_021774379.1|0.0e+00|uncharacterized protein LOC110738326 [Chenopodium quinoa]
LOC110738325	XM_021918688.1	Known_gene	1	441446	448260	NW_018742244.1	-	6815	2304	XP_021774380.1|2.2e-286|protein LAZ1-like [Chenopodium quinoa]
LOC110738323	XM_021918686.1	Known_gene	1	1564042	1564839	NW_018743389.1	+	798	798	XP_021774378.1|7.7e-154|uncharacterized protein LOC110738323 [Chenopodium quinoa]
LOC110738322	XM_021918685.1	Known_gene	1	1199763	1200644	NW_018743389.1	-	882	526	XP_021773035.1|1.8e-90|uncharacterized protein LOC110736998 isoform X2 [Chenopodium quinoa]
LOC110738321	XM_021918684.1	Known_gene	1	1080094	1080669	NW_018743389.1	+	576	576	XP_021774376.1|5.6e-106|uncharacterized protein LOC110738321 [Chenopodium quinoa]
LOC110738320	XM_021918683.1	Known_gene	1	1009804	1010753	NW_018743389.1	+	950	877	XP_021774375.1|3.6e-165|pollen-specific leucine-rich repeat extensin-like protein 1 [Chenopodium quinoa]
LOC110738319	XM_021918681.1,BGI_novel_T005451	Known_gene	2	983762	1001982	NW_018743389.1	+	18221	676	XP_021774373.1|3.1e-119|two-component response regulator ORR5-like [Chenopodium quinoa]
LOC110738318	XM_021918680.1	Known_gene	1	975790	976887	NW_018743389.1	-	1098	930	XP_021774372.1|1.5e-180|uncharacterized protein LOC110738318 [Chenopodium quinoa]
LOC110738317	XM_021918679.1	Known_gene	1	914528	917439	NW_018743389.1	+	2912	408	XP_021774371.1|4.0e-74|uncharacterized protein LOC110738317 [Chenopodium quinoa]
LOC110738316	XM_021918682.1	Known_gene	1	422278	426892	NW_018742244.1	-	4615	1522	XP_021774374.1|1.7e-154|uncharacterized protein LOC110738316 [Chenopodium quinoa]
LOC110738314	XM_021918678.1	Known_gene	1	808445	809861	NW_018743389.1	-	1417	1417	XP_021774370.1|9.6e-200|zinc finger MYM-type protein 5-like [Chenopodium quinoa]
LOC110738313	XM_021918677.1	Known_gene	1	650844	651578	NW_018743389.1	+	735	735	XP_021774369.1|3.6e-142|protein MAIN-LIKE 1-like [Chenopodium quinoa]
LOC110738311	XM_021918675.1	Known_gene	1	424953	425276	NW_018743389.1	-	324	324	XP_021774367.1|7.6e-52|mitochondrial import receptor subunit TOM9-2-like [Chenopodium quinoa]
LOC110738310	XM_021918674.1	Known_gene	1	369225	369605	NW_018743389.1	+	381	381	XP_021774366.1|4.7e-69|uncharacterized protein LOC110738310 [Chenopodium quinoa]
LOC110738309	XM_021918673.1	Known_gene	1	357274	358888	NW_018743389.1	-	1615	1417	XP_021774365.1|2.4e-227|protein MAIN-LIKE 1-like [Chenopodium quinoa]
LOC110738308	XM_021918672.1	Known_gene	1	355006	356235	NW_018743389.1	+	1230	978	XP_021774364.1|7.6e-188|protein FAR1-RELATED SEQUENCE 5-like [Chenopodium quinoa]
LOC110738307	XM_021918671.1	Known_gene	1	353862	354939	NW_018743389.1	+	1078	339	XP_021774363.1|2.3e-59|uncharacterized protein LOC110738307 [Chenopodium quinoa]
LOC110738306	XM_021918670.1	Known_gene	1	341395	342849	NW_018743389.1	+	1455	1455	XP_021774362.1|2.6e-285|uncharacterized protein LOC110738306 [Chenopodium quinoa]
LOC110738304	XM_021918668.1	Known_gene	1	221117	222294	NW_018743389.1	+	1178	657	XP_021774360.1|9.5e-126|uncharacterized protein LOC110738304 [Chenopodium quinoa]
LOC110738303	XM_021918667.1	Known_gene	1	164841	166440	NW_018743389.1	+	1600	1431	XP_021774359.1|5.7e-293|uncharacterized protein LOC110738303 [Chenopodium quinoa]
LOC110738302	XM_021918666.1	Known_gene	1	92184	92830	NW_018743389.1	+	647	528	XP_021774358.1|1.8e-98|uncharacterized protein LOC110738302 [Chenopodium quinoa]
LOC110738300	XM_021918664.1	Known_gene	1	5047533	5048666	NW_018743389.1	+	1134	854	XP_021774356.1|1.6e-101|non-specific lipid-transfer protein-like protein At2g13820 [Chenopodium quinoa]
LOC110738299	XM_021918663.1	Known_gene	1	4990000	4990488	NW_018743389.1	+	489	382	XP_021755724.1|2.2e-58|uncharacterized protein LOC110720934 [Chenopodium quinoa]
LOC110738298	XM_021918662.1	Known_gene	1	4865181	4868764	NW_018743389.1	+	3584	919	XP_021774354.1|3.8e-141|thaumatin-like protein 1b [Chenopodium quinoa]
LOC110738294	XM_021918660.1	Known_gene	1	3968414	3969541	NW_018743389.1	+	1128	812	XP_021774352.1|1.5e-101|small heat shock protein, chloroplastic-like [Chenopodium quinoa]
LOC110738293	XM_021918659.1	Known_gene	1	3833636	3835319	NW_018743389.1	+	1684	1071	XP_021774351.1|8.1e-167|transcription factor MYB59-like [Chenopodium quinoa]
LOC110738290	XM_021918669.1,XM_021918661.1,XM_021918676.1,XM_021918665.1	Known_gene	4	395755	400597	NW_018742244.1	-	4843	3567	XP_021774353.1|0.0e+00|protein NLP2-like [Chenopodium quinoa]
LOC110738289	XM_021918658.1	Known_gene	1	2092159	2095269	NW_018743389.1	+	3111	1067	XP_021774350.1|1.6e-159|zinc finger protein CONSTANS-like [Chenopodium quinoa]
LOC110738287	XM_021918657.1,BGI_novel_T005466	Known_gene	2	1425026	1427032	NW_018743389.1	+	2007	1634	XP_021741699.1|2.5e-141|uncharacterized protein LOC110707925 [Chenopodium quinoa]
LOC110738286	XM_021918656.1	Known_gene	1	1425026	1425673	NW_018743389.1	+	648	556	XP_021774348.1|4.8e-78|uncharacterized protein LOC110738286 [Chenopodium quinoa]
LOC110738285	XM_021918655.1	Known_gene	1	1326983	1327932	NW_018743389.1	+	950	950	XP_021774347.1|1.6e-102|uncharacterized protein LOC110738285 [Chenopodium quinoa]
LOC110738282	XM_021918653.1	Known_gene	1	1131356	1133147	NW_018743389.1	-	1792	1490	XP_021774345.1|3.6e-149|uncharacterized protein LOC110738282 [Chenopodium quinoa]
LOC110738279	XM_021918654.1	Known_gene	1	373317	376772	NW_018742244.1	-	3456	2809	XP_021774346.1|0.0e+00|pentatricopeptide repeat-containing protein At2g17140-like [Chenopodium quinoa]
LOC110738278	XM_021918652.1	Known_gene	1	478198	480204	NW_018743389.1	+	2007	1359	XP_021774344.1|3.0e-206|pectinesterase-like [Chenopodium quinoa]
LOC110738274	XM_021918651.1	Known_gene	1	107591	108824	NW_018743389.1	-	1234	1025	XP_021774343.1|1.1e-96|heavy metal-associated isoprenylated plant protein 16-like [Chenopodium quinoa]
LOC110738273	XM_021918650.1	Known_gene	1	103589	104708	NW_018743389.1	-	1120	782	XP_021774342.1|1.6e-66|uncharacterized protein LOC110738273 [Chenopodium quinoa]
LOC110738272	XM_021918648.1	Known_gene	1	15347	18880	NW_018744910.1	+	3534	2453	XP_021719364.1|0.0e+00|heat shock 70 kDa protein 18-like [Chenopodium quinoa]
LOC110738271	XM_021918647.1	Known_gene	1	60016	62910	NW_018743384.1	-	2895	1965	XP_021774339.1|0.0e+00|uncharacterized protein LOC110738271, partial [Chenopodium quinoa]
LOC110738270	XM_021918646.1	Known_gene	1	1532	2002	NW_018745265.1	+	471	471	XP_021745450.1|9.3e-83|uncharacterized protein LOC110711385 [Chenopodium quinoa]
LOC110738269	XM_021918649.1	Known_gene	1	329797	363208	NW_018742244.1	+	33412	4360	XP_010690227.1|0.0e+00|PREDICTED: Niemann-Pick C1 protein [Beta vulgaris subsp. vulgaris]
LOC110738268	XM_021918645.1	Known_gene	1	157531	159646	NW_018743382.1	-	2116	1168	XP_021715556.1|4.8e-189|DNA ligase 1-like isoform X1 [Chenopodium quinoa]
LOC110738267	XM_021918644.1	Known_gene	1	132601	136475	NW_018743382.1	-	3875	1801	XP_021758400.1|7.7e-178|uncharacterized protein LOC110723357 [Chenopodium quinoa]
LOC110738266	XM_021918643.1	Known_gene	1	146637	149193	NW_018743382.1	+	2557	2134	XP_021745429.1|4.2e-239|probable inactive purple acid phosphatase 29 [Chenopodium quinoa]
LOC110738265	XM_021918642.1,BGI_novel_T005432,BGI_novel_T005433	Known_gene	3	138186	142552	NW_018743382.1	-	4367	3954	XP_021774334.1|1.7e-298|anthocyanin 3'-O-beta-glucosyltransferase-like [Chenopodium quinoa]
LOC110738264	XM_021918641.1	Known_gene	1	127606	130979	NW_018743382.1	-	3374	1919	XP_021774320.1|1.2e-221|uncharacterized protein LOC110738254 [Chenopodium quinoa]
LOC110738263	XM_021918640.1	Known_gene	1	122405	127182	NW_018743382.1	+	4778	4011	XP_021739183.1|0.0e+00|protein FAR1-RELATED SEQUENCE 5-like isoform X4 [Chenopodium quinoa]
LOC110738262	XM_021918638.1	Known_gene	1	113508	118162	NW_018743382.1	+	4655	1615	XP_021774330.1|1.2e-243|uncharacterized protein LOC110738262 [Chenopodium quinoa]
LOC110738261	XM_021918637.1	Known_gene	1	107532	112673	NW_018743382.1	+	5142	2755	XP_021774329.1|0.0e+00|DNA replication licensing factor MCM5-like [Chenopodium quinoa]
LOC110738260	XM_021918636.1,BGI_novel_T005431,XM_021918635.1	Known_gene	3	89852	106889	NW_018743382.1	+	17038	5617	XP_021774327.1|0.0e+00|dicer-like protein 4 isoform X1 [Chenopodium quinoa]
LOC110738259	XM_021918639.1	Known_gene	1	315052	320510	NW_018742244.1	+	5459	2633	XP_021774331.1|0.0e+00|probable galacturonosyltransferase 3 [Chenopodium quinoa]
LOC110738258	XM_021918634.1	Known_gene	1	82477	86132	NW_018743382.1	+	3656	3560	XP_021850563.1|0.0e+00|leucine-rich repeat receptor-like protein kinase TDR [Spinacia oleracea]
LOC110738257	XM_021918633.1	Known_gene	1	65980	67354	NW_018743382.1	+	1375	1108	XP_021774325.1|3.5e-104|uncharacterized protein LOC110738257 [Chenopodium quinoa]
LOC110738256	XM_021918631.1,XM_021918630.1,XM_021918632.1	Known_gene	3	36484	59766	NW_018743382.1	+	23283	2749	XP_021774324.1|0.0e+00|protein ENHANCED DISEASE RESISTANCE 2-like isoform X3 [Chenopodium quinoa]
LOC110738255	XM_021918629.1	Known_gene	1	2	2010	NW_018743382.1	+	2009	1540	XP_010687752.1|2.3e-191|PREDICTED: sugar transport protein 7 isoform X1 [Beta vulgaris subsp. vulgaris]
LOC110738254	XM_021918628.1	Known_gene	1	152950	157603	NW_018743382.1	-	4654	2925	XP_021774320.1|0.0e+00|uncharacterized protein LOC110738254 [Chenopodium quinoa]
LOC110738253	XM_021918626.1	Known_gene	1	149355	152675	NW_018743382.1	+	3321	2553	XP_021746401.1|0.0e+00|protein FAR1-RELATED SEQUENCE 5-like [Chenopodium quinoa]
LOC110738252	XM_021918625.1	Known_gene	1	31412	32196	NW_018745265.1	-	785	486	XP_021745431.1|1.3e-87|uncharacterized protein LOC110711367 [Chenopodium quinoa]
LOC110738251	XM_021918624.1	Known_gene	1	123575	124407	NW_018743382.1	+	833	684	XP_021774316.1|2.5e-129|protein FAR1-RELATED SEQUENCE 5-like [Chenopodium quinoa]
LOC110738250	XM_021918627.1	Known_gene	1	320588	322915	NW_018742244.1	+	2328	2327	XP_021774319.1|0.0e+00|LOW QUALITY PROTEIN: pentatricopeptide repeat-containing protein At2g17210-like [Chenopodium quinoa]
LOC110738249	XM_021918623.1	Known_gene	1	118737	121704	NW_018743382.1	-	2968	2215	XP_021774315.1|0.0e+00|glycerophosphodiester phosphodiesterase GDPDL7-like [Chenopodium quinoa]
LOC110738248	XM_021918622.1	Known_gene	1	60103	62299	NW_018743382.1	-	2197	1885	XP_021774314.1|1.6e-210|two-component response regulator ARR12-like [Chenopodium quinoa]
LOC110738245	XM_021918621.1	Known_gene	1	564424	565532	NW_018743381.1	+	1109	956	XP_021725943.1|6.4e-107|jasmonate-induced protein homolog [Chenopodium quinoa]
LOC110738244	XM_021918620.1	Known_gene	1	564427	565532	NW_018743381.1	+	1106	953	XP_021725943.1|6.4e-107|jasmonate-induced protein homolog [Chenopodium quinoa]
LOC110738243	XM_021918619.1	Known_gene	1	564424	565532	NW_018743381.1	+	1109	956	XP_021725943.1|6.4e-107|jasmonate-induced protein homolog [Chenopodium quinoa]
LOC110738242	XM_021918618.1	Known_gene	1	564427	565532	NW_018743381.1	+	1106	953	XP_021725943.1|6.4e-107|jasmonate-induced protein homolog [Chenopodium quinoa]
LOC110738241	XM_021918616.1,XM_021918617.1	Known_gene	2	490147	493462	NW_018743381.1	+	3316	998	XP_021774309.1|1.5e-53|mitochondrial import inner membrane translocase subunit PAM16 like 2-like isoform X2 [Chenopodium quinoa]
LOC110738240	XM_021918615.1	Known_gene	1	493739	496362	NW_018743381.1	-	2624	951	XP_021774307.1|9.6e-87|universal stress protein A-like protein [Chenopodium quinoa]
LOC110738239	XM_021918614.1	Known_gene	1	477075	479053	NW_018743381.1	-	1979	1597	XP_021774306.1|9.0e-263|putative UPF0481 protein At3g02645 [Chenopodium quinoa]
LOC110738238	XM_021918613.1	Known_gene	1	480077	488103	NW_018743381.1	-	8027	2636	XP_021852296.1|0.0e+00|aldehyde dehydrogenase 22A1 [Spinacia oleracea]
LOC110738237	XM_021918612.1	Known_gene	1	468721	476971	NW_018743381.1	+	8251	2675	XP_021774304.1|0.0e+00|uncharacterized protein LOC110738237 [Chenopodium quinoa]
LOC110738236	XM_021918611.1	Known_gene	1	460023	463121	NW_018743381.1	-	3099	1686	XP_021774303.1|2.8e-89|uncharacterized protein LOC110738236 [Chenopodium quinoa]
LOC110738234	XM_021918610.1,XM_021918609.1	Known_gene	2	441413	445860	NW_018743381.1	+	4448	1073	XP_021730333.1|1.7e-92|actin-related protein 2/3 complex subunit 4 isoform X1 [Chenopodium quinoa]
LOC110738233	XM_021918608.1	Known_gene	1	451395	453545	NW_018743381.1	-	2151	1608	XP_021774300.1|4.6e-113|inactive protein RESTRICTED TEV MOVEMENT 1-like [Chenopodium quinoa]
LOC110738232	XM_021918607.1	Known_gene	1	447323	450934	NW_018743381.1	+	3612	2157	XP_021774299.1|0.0e+00|protein high chlorophyll fluorescent 107-like [Chenopodium quinoa]
LOC110738231	XM_021918606.1	Known_gene	1	429611	440269	NW_018743381.1	+	10659	3968	XP_021774298.1|0.0e+00|FIP1[V]-like protein [Chenopodium quinoa]
LOC110738230	BGI_novel_T005425,XM_021918605.1	Known_gene	2	424637	429039	NW_018743381.1	-	4403	1796	XP_021774297.1|6.5e-243|uncharacterized protein LOC110738230 [Chenopodium quinoa]
LOC110738229	XM_021918604.1	Known_gene	1	409089	416662	NW_018743381.1	-	7574	2473	XP_021774296.1|0.0e+00|ATP-citrate synthase beta chain protein 1 [Chenopodium quinoa]
LOC110738228	XM_021918603.1	Known_gene	1	391334	399732	NW_018743381.1	-	8399	4199	XP_021862546.1|0.0e+00|phytochrome B-like [Spinacia oleracea]
LOC110738227	XM_021918602.1	Known_gene	1	378704	388360	NW_018743381.1	-	9657	3191	XP_021774294.1|0.0e+00|tyrosine-protein kinase receptor UFO-like [Chenopodium quinoa]
LOC110738226	XM_021918600.1	Known_gene	1	374700	378443	NW_018743381.1	+	3744	857	XP_021730343.1|2.0e-51|huntingtin-interacting protein K-like [Chenopodium quinoa]
LOC110738225	XM_021918599.1,BGI_novel_T005422	Known_gene	2	335532	338923	NW_018743381.1	-	3392	2639	XP_021774291.1|5.2e-152|peroxidase 29-like [Chenopodium quinoa]
LOC110738224	XM_021918601.1	Known_gene	1	305509	308923	NW_018742244.1	+	3415	1549	XP_021774293.1|6.5e-234|probable serine/threonine-protein kinase PIX13 [Chenopodium quinoa]
LOC110738223	XM_021918597.1,BGI_novel_T005423,BGI_novel_T005424	Known_gene	3	339016	345402	NW_018743381.1	-	6387	4659	XP_021774289.1|0.0e+00|pentatricopeptide repeat-containing protein At2g37320-like [Chenopodium quinoa]
LOC110738222	BGI_novel_T005421,XM_021918596.1,XM_021918595.1	Known_gene	3	327161	334857	NW_018743381.1	-	7697	1497	XP_021774287.1|1.1e-174|zinc finger protein 830-like [Chenopodium quinoa]
LOC110738221	XM_021918594.1	Known_gene	1	310634	318846	NW_018743381.1	-	8213	2766	XP_021774286.1|0.0e+00|pathogenesis-related homeodomain protein-like [Chenopodium quinoa]
LOC110738220	XM_021918593.1	Known_gene	1	272028	276194	NW_018743381.1	-	4167	1502	XP_021774285.1|1.7e-141|probable enoyl-CoA hydratase 1, peroxisomal [Chenopodium quinoa]
LOC110738218	XM_021918591.1	Known_gene	1	258017	265074	NW_018743381.1	-	7058	2474	XP_021774283.1|5.0e-220|probable protein phosphatase 2C 42 [Chenopodium quinoa]
LOC110738217	XM_021918590.1,XM_021918589.1	Known_gene	2	246147	257309	NW_018743381.1	-	11163	4132	XP_021730361.1|0.0e+00|uncharacterized protein LOC110697296 [Chenopodium quinoa]
LOC110738216	XM_021918588.1	Known_gene	1	226551	227691	NW_018743381.1	-	1141	1141	XP_021774280.1|2.0e-91|calmodulin-like [Chenopodium quinoa]
LOC110738215	XM_021918587.1	Known_gene	1	215198	223416	NW_018743381.1	+	8219	1277	XP_021774279.1|5.4e-117|DNA replication complex GINS protein SLD5-like [Chenopodium quinoa]
LOC110738214	XM_021918586.1	Known_gene	1	201462	203432	NW_018743381.1	-	1971	1457	XP_021774278.1|2.8e-130|transcription factor bHLH147-like [Chenopodium quinoa]
LOC110738213	XM_021918585.1	Known_gene	1	209976	214007	NW_018743381.1	-	4032	1657	XP_021774277.1|6.7e-144|uncharacterized protein LOC110738213 [Chenopodium quinoa]
LOC110738212	XM_021918583.1	Known_gene	1	167899	177087	NW_018743381.1	-	9189	1117	XP_021774275.1|3.1e-100|probable prefoldin subunit 3 [Chenopodium quinoa]
LOC110738211	XM_021918582.1	Known_gene	1	154234	156779	NW_018743381.1	-	2546	2054	XP_021774274.1|3.6e-264|probable WRKY transcription factor 23 [Chenopodium quinoa]
LOC110738210	XM_021918580.1,XM_021918581.1	Known_gene	2	92058	112983	NW_018743381.1	+	20926	3052	XP_021774273.1|0.0e+00|flowering time control protein FCA-like isoform X2 [Chenopodium quinoa]
LOC110738209	XM_021918578.1,XM_021918579.1	Known_gene	2	40662	58075	NW_018743381.1	+	17414	3634	XP_021774270.1|0.0e+00|CSC1-like protein RXW8 isoform X1 [Chenopodium quinoa]
LOC110738208	BGI_novel_T005419,XM_021918577.1	Known_gene	2	12449	19380	NW_018743381.1	-	6932	1697	XP_021859193.1|4.9e-275|galactokinase-like [Spinacia oleracea]
LOC110738207	XM_021918575.1	Known_gene	1	1	2573	NW_018743381.1	-	2573	1287	XP_021774267.1|2.1e-129|uncharacterized protein LOC110738207 [Chenopodium quinoa]
LOC110738206	XM_021918574.1	Known_gene	1	15148	15901	NW_018745209.1	+	754	754	XP_021774266.1|2.8e-113|4-hydroxyphenylpyruvate dioxygenase-like [Chenopodium quinoa]
LOC110738201	XM_021918573.1	Known_gene	1	364419	366864	NW_018743381.1	+	2446	1756	XP_021774265.1|3.7e-209|probable pectinesterase 67 [Chenopodium quinoa]
LOC110738200	XM_021918572.1	Known_gene	1	350188	351366	NW_018743381.1	+	1179	1090	XP_021774264.1|1.1e-118|uncharacterized protein LOC110738200 [Chenopodium quinoa]
LOC110738199	XM_021918570.1	Known_gene	1	289351	291326	NW_018743381.1	-	1976	1567	XP_021774262.1|1.5e-214|1-aminocyclopropane-1-carboxylate oxidase homolog 1-like [Chenopodium quinoa]
LOC110738198	XM_021918569.1	Known_gene	1	113642	115748	NW_018743381.1	-	2107	1258	XP_021774261.1|2.4e-194|peroxidase 40 [Chenopodium quinoa]
LOC110738197	XM_021918568.1	Known_gene	1	65516	67119	NW_018743381.1	+	1604	1604	XP_021774260.1|4.8e-131|Werner Syndrome-like exonuclease [Chenopodium quinoa]
LOC110738196	XM_021918592.1,XM_021918571.1,XM_021918584.1,XM_021918576.1	Known_gene	4	282763	288891	NW_018742244.1	+	6129	2477	XP_021774263.1|3.8e-228|probable serine/threonine-protein kinase PBL21 isoform X1 [Chenopodium quinoa]
LOC110738195	XM_021918567.1	Known_gene	1	566337	567143	NW_018743381.1	-	807	807	XP_021774259.1|5.8e-149|pectinesterase inhibitor 6-like [Chenopodium quinoa]
LOC110738194	XM_021918566.1	Known_gene	1	465610	467346	NW_018743381.1	+	1737	987	XP_021774258.1|4.2e-194|NAC domain-containing protein 41-like [Chenopodium quinoa]
LOC110738193	XM_021918565.1	Known_gene	1	359639	361213	NW_018743381.1	-	1575	1575	XP_021774257.1|0.0e+00|uncharacterized protein LOC110738193 [Chenopodium quinoa]
LOC110738192	XM_021918598.1	Known_gene	1	17738664	17741113	NW_018742204.1	-	2450	1200	XP_021774290.1|9.5e-233|F-box/FBD/LRR-repeat protein At1g13570-like [Chenopodium quinoa]
LOC110738190	XM_021918564.1	Known_gene	1	293783	296027	NW_018743381.1	-	2245	1062	XP_021774256.1|6.1e-207|GDSL esterase/lipase At4g16230-like [Chenopodium quinoa]
LOC110738189	XM_021918563.1	Known_gene	1	182419	184973	NW_018743381.1	+	2555	2028	XP_021774255.1|0.0e+00|zinc finger MYM-type protein 1-like [Chenopodium quinoa]
LOC110738188	XM_021918562.1	Known_gene	1	62082	62741	NW_018743381.1	+	660	660	XP_021774254.1|7.3e-126|uncharacterized protein LOC110738188 [Chenopodium quinoa]
LOC110738187	XM_021918561.1	Known_gene	1	59306	60481	NW_018743381.1	-	1176	1176	XP_021774253.1|3.6e-232|uncharacterized protein LOC110738187 [Chenopodium quinoa]
LOC110738186	XM_021918560.1	Known_gene	1	21097	23228	NW_018743381.1	+	2132	1917	XP_021774252.1|0.0e+00|uncharacterized protein LOC110738186 [Chenopodium quinoa]
LOC110738185	XM_021918559.1	Known_gene	1	2323	5235	NW_018743380.1	+	2913	876	XP_021774251.1|1.3e-125|NEP1-interacting protein-like 2, partial [Chenopodium quinoa]
LOC110738184	XM_021918558.1	Known_gene	1	5969	6863	NW_018743379.1	+	895	895	XP_021723157.1|1.8e-106|uncharacterized protein LOC110690616 [Chenopodium quinoa]
LOC110738183	XM_021918557.1	Known_gene	1	252264	255050	NW_018742244.1	+	2787	1404	XP_021774249.1|9.8e-112|protein-S-isoprenylcysteine O-methyltransferase A-like [Chenopodium quinoa]
LOC110738182	XM_021918556.1	Known_gene	1	13501	21945	NW_018743377.1	-	8445	8445	XP_021713473.1|0.0e+00|uncharacterized protein LOC110681628 [Chenopodium quinoa]
LOC110738180	XM_021918555.1	Known_gene	1	1970985	1974743	NW_018743373.1	-	3759	1560	XP_021774247.1|0.0e+00|uncharacterized protein LOC110738180 [Chenopodium quinoa]
LOC110738179	XM_021918553.1	Known_gene	1	1685251	1686486	NW_018743373.1	-	1236	828	XP_021774245.1|6.3e-159|uncharacterized protein LOC110738179 [Chenopodium quinoa]
LOC110738177	XM_021918554.1	Known_gene	1	250223	251894	NW_018742244.1	+	1672	962	XP_021774246.1|1.0e-123|uncharacterized protein LOC110738177 [Chenopodium quinoa]
LOC110738176	XM_021918552.1	Known_gene	1	1523110	1526669	NW_018743373.1	-	3560	3222	XP_021774244.1|0.0e+00|uncharacterized protein LOC110738176 [Chenopodium quinoa]
LOC110738175	XM_021918551.1	Known_gene	1	1504284	1506489	NW_018743373.1	-	2206	1821	XP_021774243.1|0.0e+00|uncharacterized protein LOC110738175 [Chenopodium quinoa]
LOC110738174	XM_021918550.1	Known_gene	1	1473553	1474266	NW_018743373.1	-	714	714	XP_021774242.1|5.6e-140|uncharacterized protein LOC110738174 [Chenopodium quinoa]
LOC110738173	XM_021918549.1	Known_gene	1	1357947	1360164	NW_018743373.1	-	2218	1512	XP_021774241.1|3.3e-307|protein FAR1-RELATED SEQUENCE 11-like [Chenopodium quinoa]
LOC110738172	XM_021918547.1	Known_gene	1	1353018	1354505	NW_018743373.1	+	1488	1488	XP_021774239.1|1.3e-295|uncharacterized protein LOC110738172 [Chenopodium quinoa]
LOC110738171	XM_021918546.1	Known_gene	1	1250338	1251318	NW_018743373.1	+	981	981	XP_021774238.1|1.4e-194|uncharacterized protein LOC110738171 [Chenopodium quinoa]
LOC110738170	XM_021918545.1	Known_gene	1	1210509	1211532	NW_018743373.1	+	1024	939	XP_021774237.1|2.4e-183|uncharacterized protein LOC110738170 [Chenopodium quinoa]
LOC110738169	XM_021918544.1	Known_gene	1	1173150	1175617	NW_018743373.1	-	2468	2112	XP_021774236.1|0.0e+00|uncharacterized protein LOC110738169 [Chenopodium quinoa]
LOC110738168	XM_021918542.1	Known_gene	1	1078734	1081211	NW_018743373.1	+	2478	1569	XP_021774234.1|3.8e-306|protein FAR1-RELATED SEQUENCE 5-like [Chenopodium quinoa]
LOC110738167	XM_021918541.1	Known_gene	1	1014001	1014890	NW_018743373.1	+	890	504	XP_021774233.1|4.0e-92|uncharacterized protein LOC110738167 [Chenopodium quinoa]
LOC110738166	XM_021918540.1	Known_gene	1	1011511	1012020	NW_018743373.1	+	510	510	XP_021774232.1|6.1e-88|uncharacterized protein LOC110738166 [Chenopodium quinoa]
LOC110738165	XM_021918539.1	Known_gene	1	857574	857999	NW_018743373.1	+	426	426	XP_021774231.1|9.6e-79|uncharacterized protein LOC110738165 [Chenopodium quinoa]
LOC110738164	BGI_novel_T005408,XM_021918537.1	Known_gene	2	849545	854207	NW_018743373.1	-	4663	3921	XP_021774229.1|9.1e-261|formin-like protein 2 [Chenopodium quinoa]
LOC110738163	XM_021918536.1	Known_gene	1	752398	753264	NW_018743373.1	+	867	867	XP_021774228.1|5.8e-163|uncharacterized protein LOC110738163 [Chenopodium quinoa]
LOC110738161	XM_021918534.1	Known_gene	1	451561	452882	NW_018743373.1	-	1322	1059	XP_021774226.1|7.4e-213|uncharacterized protein LOC110738161 [Chenopodium quinoa]
LOC110738160	XM_021918533.1	Known_gene	1	250307	251239	NW_018743373.1	+	933	843	XP_021774225.1|1.7e-159|uncharacterized protein LOC110738160 [Chenopodium quinoa]
LOC110738159	XM_021918531.1	Known_gene	1	1943365	1957272	NW_018743373.1	-	13908	837	XP_021774223.1|2.1e-106|cytochrome P450 83B1-like [Chenopodium quinoa]
LOC110738158	XM_021918530.1	Known_gene	1	1935356	1939973	NW_018743373.1	-	4618	2694	XP_021760181.1|3.4e-222|uncharacterized protein LOC110725010 [Chenopodium quinoa]
LOC110738157	XM_021918529.1	Known_gene	1	1911769	1931044	NW_018743373.1	-	19276	2613	XP_021774221.1|4.6e-288|cytochrome P450 83B1-like [Chenopodium quinoa]
LOC110738156	BGI_novel_T000540,XM_021918538.1,XM_021918543.1,XM_021918548.1,XM_021918535.1,XM_021918532.1	Known_gene	6	238331	242131	NW_018742244.1	+	3801	1969	XP_021774240.1|2.3e-157|dihydroorotase, mitochondrial-like isoform X3 [Chenopodium quinoa]
LOC110738155	XM_021918528.1	Known_gene	1	1905765	1909267	NW_018743373.1	+	3503	3412	XP_021724651.1|2.8e-128|uncharacterized protein LOC110691971 [Chenopodium quinoa]
LOC110738154	XM_021918527.1,XM_021918525.1,XM_021918526.1	Known_gene	3	1840601	1852211	NW_018743373.1	-	11611	2971	XP_021774218.1|0.0e+00|anoctamin-like protein At1g73020 isoform X2 [Chenopodium quinoa]
LOC110738153	XM_021918521.1,XM_021918524.1,XM_021918522.1	Known_gene	3	1810273	1811936	NW_018743373.1	+	1664	1148	XP_021774213.1|2.1e-184|nucleolin-like isoform X1 [Chenopodium quinoa]
LOC110738152	XM_021918520.1	Known_gene	1	1812098	1813884	NW_018743373.1	+	1787	1335	XP_021774212.1|4.8e-209|uncharacterized protein LOC110738152 [Chenopodium quinoa]
LOC110738150	XM_021918518.1	Known_gene	1	1800445	1802884	NW_018743373.1	+	2440	872	XP_021774210.1|4.4e-78|60S ribosomal protein L28-1-like [Chenopodium quinoa]
LOC110738149	XM_021918517.1	Known_gene	1	1803218	1807262	NW_018743373.1	-	4045	1036	XP_021774209.1|4.7e-111|GTP-binding protein YPTM2-like [Chenopodium quinoa]
LOC110738148	XM_021918516.1	Known_gene	1	1784703	1797263	NW_018743373.1	-	12561	1416	XP_021774208.1|5.2e-137|RWD domain-containing protein 1-like [Chenopodium quinoa]
LOC110738147	XM_021918519.1	Known_gene	1	242348	244221	NW_018742244.1	-	1874	1874	XP_021774211.1|5.0e-204|putative RING-H2 finger protein ATL53 [Chenopodium quinoa]
LOC110738146	XM_021918515.1,XM_021918514.1	Known_gene	2	1769251	1780999	NW_018743373.1	+	11749	2811	XP_021774207.1|0.0e+00|NADP-specific glutamate dehydrogenase-like isoform X2 [Chenopodium quinoa]
LOC110738145	XM_021918512.1,XM_021918513.1	Known_gene	2	1731490	1740799	NW_018743373.1	-	9310	2573	XP_021774205.1|1.7e-308|serine/threonine protein phosphatase 2A 55 kDa regulatory subunit B beta isoform-like isoform X2 [Chenopodium quinoa]
LOC110738144	XM_021918511.1	Known_gene	1	1727209	1731039	NW_018743373.1	+	3831	1839	XP_021774203.1|0.0e+00|uncharacterized protein LOC110738144 [Chenopodium quinoa]
LOC110738143	XM_021918510.1	Known_gene	1	1721553	1723901	NW_018743373.1	-	2349	1662	XP_021774202.1|6.0e-169|phosphatidylinositol N-acetylglucosaminyltransferase subunit C-like [Chenopodium quinoa]
LOC110738142	XM_021918509.1	Known_gene	1	1716406	1721370	NW_018743373.1	+	4965	784	XP_021774201.1|1.0e-49|uncharacterized protein LOC110738142 [Chenopodium quinoa]
LOC110738141	XM_021918508.1	Known_gene	1	1651202	1678103	NW_018743373.1	-	26902	5810	XP_021774200.1|0.0e+00|brefeldin A-inhibited guanine nucleotide-exchange protein 5-like [Chenopodium quinoa]
LOC110738140	XM_021918506.1	Known_gene	1	1596270	1597774	NW_018743373.1	-	1505	1505	XP_021774198.1|1.6e-128|dof zinc finger protein DOF3.1-like [Chenopodium quinoa]
LOC110738139	XM_021918505.1,XM_021918504.1	Known_gene	2	1528437	1538407	NW_018743373.1	-	9971	1744	XP_021774196.1|1.2e-166|LAG1 longevity assurance homolog 2-like [Chenopodium quinoa]
LOC110738138	XM_021918507.1	Known_gene	1	245096	248681	NW_018742244.1	-	3586	2837	XP_021774199.1|0.0e+00|uncharacterized protein LOC110738138 [Chenopodium quinoa]
LOC110738137	XM_021918503.1	Known_gene	1	1511256	1520380	NW_018743373.1	-	9125	4527	XP_021774195.1|0.0e+00|uncharacterized protein LOC110738137 [Chenopodium quinoa]
LOC110738136	XM_021918502.1,BGI_novel_T005413	Known_gene	2	1468958	1471896	NW_018743373.1	-	2939	1976	XP_021774194.1|1.2e-195|inorganic pyrophosphatase 2-like [Chenopodium quinoa]
LOC110738135	XM_021918501.1	Known_gene	1	1369494	1374555	NW_018743373.1	-	5062	1277	XP_021774193.1|3.6e-169|inorganic pyrophosphatase 1-like [Chenopodium quinoa]
LOC110738134	XM_021918500.1	Known_gene	1	1338863	1342683	NW_018743373.1	+	3821	3821	XP_021774192.1|2.0e-98|abscisic acid receptor PYL2-like [Chenopodium quinoa]
LOC110738133	XM_021918499.1	Known_gene	1	1294142	1295553	NW_018743373.1	-	1412	693	XP_021774191.1|2.3e-58|stress-response A/B barrel domain-containing protein At5g22580-like [Chenopodium quinoa]
LOC110738132	XM_021918498.1	Known_gene	1	1277279	1278817	NW_018743373.1	+	1539	1539	XP_021774190.1|3.6e-176|uncharacterized protein LOC110738132 [Chenopodium quinoa]
LOC110738131	XM_021918497.1	Known_gene	1	1255795	1262721	NW_018743373.1	+	6927	1084	XP_021774189.1|1.1e-49|uncharacterized protein LOC110738131 [Chenopodium quinoa]
LOC110738130	XM_021918495.1	Known_gene	1	1219055	1222318	NW_018743373.1	-	3264	835	XP_021774187.1|4.6e-93|probable ribosome biogenesis protein RLP24 [Chenopodium quinoa]
LOC110738129	BGI_novel_T005412,XM_021918494.1	Known_gene	2	1197237	1204072	NW_018743373.1	-	6836	2286	XP_021774186.1|2.2e-280|probable 2-carboxy-D-arabinitol-1-phosphatase [Chenopodium quinoa]
LOC110738128	XM_021918493.1	Known_gene	1	1161087	1165636	NW_018743373.1	+	4550	939	XP_021774185.1|1.2e-73|mediator of RNA polymerase II transcription subunit 32-like [Chenopodium quinoa]
LOC110738127	XM_021918496.1	Known_gene	1	231975	237555	NW_018742244.1	-	5581	2511	XP_021774188.1|5.0e-260|uncharacterized CRM domain-containing protein At3g25440, chloroplastic-like [Chenopodium quinoa]
LOC110738126	BGI_novel_T005410,BGI_novel_T005411,XM_021918491.1,XM_021918492.1	Known_gene	4	1146451	1152415	NW_018743373.1	-	5965	3416	XP_021774184.1|3.6e-70|chitinase domain-containing protein 1-like isoform X2 [Chenopodium quinoa]
LOC110738125	XM_021918490.1	Known_gene	1	1121171	1132263	NW_018743373.1	-	11093	2607	XP_021774182.1|0.0e+00|nucleobase-ascorbate transporter 12-like [Chenopodium quinoa]
LOC110738124	XM_021918489.1	Known_gene	1	1082190	1086266	NW_018743373.1	-	4077	3676	XP_021774181.1|1.1e-279|uncharacterized protein LOC110738124 [Chenopodium quinoa]
LOC110738123	XM_021918523.1	Known_gene	1	17691515	17693089	NW_018742204.1	-	1575	741	XP_021774215.1|5.0e-131|F-box/FBD/LRR-repeat protein At1g13570-like [Chenopodium quinoa]
LOC110738121	XM_021918487.1	Known_gene	1	1052039	1055202	NW_018743373.1	-	3164	1954	XP_021774179.1|1.8e-252|arogenate dehydratase/prephenate dehydratase 6, chloroplastic-like [Chenopodium quinoa]
LOC110738120	XM_021918486.1	Known_gene	1	1023449	1025127	NW_018743373.1	+	1679	1418	XP_021774178.1|2.8e-239|uncharacterized protein LOC110738120 [Chenopodium quinoa]
LOC110738118	XM_021918488.1	Known_gene	1	227522	231862	NW_018742244.1	-	4341	1737	XP_021774180.1|1.4e-229|pentatricopeptide repeat-containing protein At5g09450, mitochondrial-like [Chenopodium quinoa]
LOC110738116	XM_021918485.1,XM_021918484.1	Known_gene	2	949000	956998	NW_018743373.1	+	7999	3225	XP_021732997.1|0.0e+00|pentatricopeptide repeat-containing protein At5g40400-like [Chenopodium quinoa]
LOC110738115	XM_021918483.1	Known_gene	1	936366	947914	NW_018743373.1	+	11549	4297	XP_021774175.1|0.0e+00|transcriptional activator DEMETER-like [Chenopodium quinoa]
LOC110738114	XM_021918482.1	Known_gene	1	924715	932338	NW_018743373.1	-	7624	3269	XP_021774174.1|0.0e+00|protein TIC 100-like [Chenopodium quinoa]
LOC110738113	XM_021918481.1	Known_gene	1	919086	923756	NW_018743373.1	-	4671	4425	XP_021774173.1|0.0e+00|pentatricopeptide repeat-containing protein At4g13650-like [Chenopodium quinoa]
LOC110738111	XM_021918480.1	Known_gene	1	841028	844049	NW_018743373.1	-	3022	2829	XP_021745865.1|0.0e+00|uncharacterized protein LOC110711755 [Chenopodium quinoa]
LOC110738110	XM_021918478.1	Known_gene	1	830369	833730	NW_018743373.1	-	3362	1760	XP_021774170.1|1.4e-179|coatomer subunit beta'-3-like [Chenopodium quinoa]
LOC110738109	XM_021918477.1	Known_gene	1	806281	809168	NW_018743373.1	-	2888	1245	XP_021774169.1|1.4e-162|histone deacetylase HDT1-like [Chenopodium quinoa]
LOC110738108	XM_021918479.1	Known_gene	1	221785	226409	NW_018742244.1	-	4625	2286	XP_021774171.1|7.1e-269|serine/threonine-protein kinase PEPKR2-like [Chenopodium quinoa]
LOC110738107	XM_021918475.1,XM_021918476.1	Known_gene	2	801340	805466	NW_018743373.1	+	4127	1725	XP_021774168.1|2.5e-186|splicing factor U2af small subunit B-like isoform X2 [Chenopodium quinoa]
LOC110738105	XM_021918474.1	Known_gene	1	753781	761196	NW_018743373.1	-	7416	3771	XP_021755637.1|6.4e-57|uncharacterized protein LOC110720866 [Chenopodium quinoa]
LOC110738104	XM_021918473.1	Known_gene	1	734432	743205	NW_018743373.1	+	8774	1738	XP_021774165.1|1.7e-278|O-acyltransferase WSD1-like [Chenopodium quinoa]
LOC110738103	XM_021918469.1,XM_021918471.1,XM_021918472.1,XM_021918470.1	Known_gene	4	680529	685489	NW_018743373.1	+	4961	2512	XP_021774161.1|2.4e-158|uncharacterized protein LOC110738103 [Chenopodium quinoa]
LOC110738101	XM_021918467.1	Known_gene	1	592561	601271	NW_018743373.1	+	8711	2713	XP_010690012.1|1.2e-299|PREDICTED: glucomannan 4-beta-mannosyltransferase 2-like [Beta vulgaris subsp. vulgaris]
LOC110738100	XM_021918466.1	Known_gene	1	554661	559697	NW_018743373.1	+	5037	2687	XP_021774158.1|0.0e+00|uncharacterized protein LOC110738100 [Chenopodium quinoa]
LOC110738099	XM_021918468.1	Known_gene	1	203211	206317	NW_018742244.1	-	3107	1750	XP_021774160.1|1.8e-301|uncharacterized protein LOC110738099 [Chenopodium quinoa]
LOC110738097	XM_021918465.1	Known_gene	1	389992	394730	NW_018743373.1	-	4739	1683	XP_021774156.1|8.6e-264|GABA transporter 1-like [Chenopodium quinoa]
LOC110738096	XM_021918464.1	Known_gene	1	375643	380392	NW_018743373.1	-	4750	1691	XP_021774155.1|8.6e-264|GABA transporter 1-like [Chenopodium quinoa]
LOC110738095	XM_021918463.1	Known_gene	1	361275	366023	NW_018743373.1	-	4749	1691	XP_021774156.1|8.6e-264|GABA transporter 1-like [Chenopodium quinoa]
LOC110738094	XM_021918462.1	Known_gene	1	291958	298279	NW_018743373.1	+	6322	1051	XP_021774154.1|2.6e-117|1,2-dihydroxy-3-keto-5-methylthiopentene dioxygenase 2-like [Chenopodium quinoa]
LOC110738093	XM_021918461.1	Known_gene	1	298780	311315	NW_018743373.1	-	12536	1106	XP_021774153.1|5.3e-121|transmembrane emp24 domain-containing protein p24beta3-like [Chenopodium quinoa]
LOC110738092	XM_021918460.1	Known_gene	1	1862866	1864861	NW_018743373.1	-	1996	1859	XP_021774152.1|2.8e-255|girdin-like [Chenopodium quinoa]
LOC110738087	XM_021918458.1	Known_gene	1	1036511	1038859	NW_018743373.1	+	2349	1614	XP_021733018.1|1.9e-223|uncharacterized protein LOC110699810 [Chenopodium quinoa]
LOC110738086	XM_021918459.1	Known_gene	1	187657	191780	NW_018742244.1	-	4124	2684	XP_021774151.1|0.0e+00|root phototropism protein 3-like [Chenopodium quinoa]
LOC110738085	XM_021918457.1	Known_gene	1	720301	725858	NW_018743373.1	+	5558	1024	XP_021774149.1|2.3e-150|O-acyltransferase WSD1-like [Chenopodium quinoa]
LOC110738083	XM_021918456.1,BGI_novel_T005402,BGI_novel_T005403	Known_gene	3	752915	756504	NW_018743369.1	+	3590	1707	XP_021761134.1|4.5e-40|photosystem II stability/assembly factor HCF136, chloroplastic-like isoform X2 [Chenopodium quinoa]
LOC110738082	XM_021918455.1,XM_021918454.1	Known_gene	2	739142	742654	NW_018743369.1	-	3513	2225	XP_021774147.1|6.4e-275|transcription termination factor MTERF5, chloroplastic-like isoform X2 [Chenopodium quinoa]
LOC110738081	BGI_novel_T005401,XM_021918452.1,XM_021918451.1,XM_021918450.1	Known_gene	4	734369	738751	NW_018743369.1	-	4383	2042	XP_021774143.1|1.3e-120|uncharacterized protein LOC110738081 isoform X2 [Chenopodium quinoa]
LOC110738080	XM_021918453.1	Known_gene	1	171920	176071	NW_018742244.1	+	4152	3112	XP_021774145.1|1.6e-226|transcription factor bHLH143-like [Chenopodium quinoa]
LOC110738079	XM_021918449.1,XM_021918448.1	Known_gene	2	506046	509123	NW_018743369.1	+	3078	1510	XP_021774140.1|4.9e-186|uncharacterized protein LOC110738079 isoform X1 [Chenopodium quinoa]
LOC110738078	BGI_novel_T005400,XM_021918447.1	Known_gene	2	473961	502550	NW_018743369.1	-	28590	4477	XP_021751471.1|0.0e+00|cullin-associated NEDD8-dissociated protein 1-like [Chenopodium quinoa]
LOC110738077	XM_021918446.1,XM_021918445.1	Known_gene	2	81269	106174	NW_018743369.1	+	24906	2226	XP_010687227.1|3.0e-264|PREDICTED: NEDD8-activating enzyme E1 regulatory subunit AXR1 [Beta vulgaris subsp. vulgaris]
LOC110738075	XM_021918444.1	Known_gene	1	439815	441845	NW_018743369.1	+	2031	683	XP_021774136.1|1.8e-111|uncharacterized protein LOC110738075 [Chenopodium quinoa]
LOC110738074	XM_021918443.1	Known_gene	1	1021903	1022832	NW_018743369.1	+	930	930	XP_021774135.1|2.1e-171|uncharacterized protein LOC110738074 [Chenopodium quinoa]
LOC110738073	XM_021918441.1	Known_gene	1	708744	709421	NW_018743369.1	+	678	678	XP_021774133.1|1.0e-127|uncharacterized protein LOC110738073 [Chenopodium quinoa]
LOC110738072	XM_021918442.1	Known_gene	1	165339	167604	NW_018742244.1	+	2266	582	XP_021774134.1|2.1e-60|peptidyl-prolyl cis-trans isomerase FKBP12-like [Chenopodium quinoa]
LOC110738071	XM_021918440.1	Known_gene	1	401662	402144	NW_018743369.1	+	483	483	XP_021774132.1|1.4e-86|uncharacterized protein LOC110738071 [Chenopodium quinoa]
LOC110738070	XM_021918438.1	Known_gene	1	199332	203569	NW_018743365.1	-	4238	2101	XP_021774130.1|2.6e-201|uncharacterized protein LOC110738070 [Chenopodium quinoa]
LOC110738069	XM_021918437.1	Known_gene	1	228959	229483	NW_018743365.1	+	525	525	XP_021774129.1|1.1e-92|uncharacterized protein LOC110738069 [Chenopodium quinoa]
LOC110738068	XM_021918439.1	Known_gene	1	147469	152079	NW_018742244.1	+	4611	2014	XP_021774131.1|5.9e-235|pre-mRNA-splicing factor 18-like [Chenopodium quinoa]
LOC110738067	XM_021918436.1	Known_gene	1	112898	113282	NW_018743365.1	+	385	385	XP_021774128.1|1.7e-69|uncharacterized protein LOC110738067 [Chenopodium quinoa]
LOC110738065	XM_021918435.1	Known_gene	1	6	2408	NW_018743363.1	+	2403	1922	KNA17728.1|4.7e-298|hypothetical protein SOVF_077450 [Spinacia oleracea]
LOC110738064	XM_021918433.1	Known_gene	1	280408	286032	NW_018743363.1	+	5625	2103	XP_010094322.1|1.8e-287|acetate/butyrate--CoA ligase AAE7, peroxisomal [Morus notabilis]
LOC110738063	XM_021918431.1,XM_021918432.1	Known_gene	2	258367	271005	NW_018743363.1	-	12639	3374	XP_021774124.1|0.0e+00|calmodulin-binding transcription activator 6-like isoform X2 [Chenopodium quinoa]
LOC110738062	XM_021918430.1	Known_gene	1	251273	255298	NW_018743363.1	+	4026	1091	XP_021730256.1|5.6e-107|GTP-binding protein SAR1A-like [Chenopodium quinoa]
LOC110738061	XM_021918428.1	Known_gene	1	235343	236125	NW_018743363.1	-	783	561	XP_021730250.1|2.7e-28|60S ribosomal protein L29-1-like [Chenopodium quinoa]
LOC110738060	XM_021918427.1	Known_gene	1	223865	232259	NW_018743363.1	+	8395	2546	XP_021774119.1|0.0e+00|dihydrolipoyl dehydrogenase 2, chloroplastic-like [Chenopodium quinoa]
LOC110738059	XM_021918429.1	Known_gene	1	143152	146929	NW_018742244.1	-	3778	1031	XP_021774121.1|1.1e-101|uncharacterized protein LOC110738059 [Chenopodium quinoa]
LOC110738058	XM_021918424.1,XM_021918426.1,XM_021918425.1,BGI_novel_T005399,XM_021918423.1	Known_gene	5	186851	208138	NW_018743363.1	-	21288	3670	XP_021774115.1|0.0e+00|serine/threonine-protein phosphatase 4 regulatory subunit 3-like isoform X1 [Chenopodium quinoa]
LOC110738057	XM_021918422.1	Known_gene	1	156705	175710	NW_018743363.1	-	19006	726	XP_021774114.1|2.3e-64|DNA-directed RNA polymerases II, IV and V subunit 9B-like [Chenopodium quinoa]
LOC110738056	XM_021918421.1	Known_gene	1	151508	154547	NW_018743363.1	-	3040	796	XP_021730245.1|8.7e-65|DNA-directed RNA polymerases II, IV and V subunit 9A [Chenopodium quinoa]
LOC110738055	XM_021918420.1	Known_gene	1	114391	115620	NW_018743363.1	-	1230	1230	XP_021774112.1|2.8e-131|ethylene-responsive transcription factor ERF017-like [Chenopodium quinoa]
LOC110738054	XM_021918417.1,XM_021918418.1,XM_021918419.1	Known_gene	3	123112	141042	NW_018743363.1	+	17931	5761	XP_021774109.1|0.0e+00|PH-interacting protein-like [Chenopodium quinoa]
LOC110738053	XM_021918415.1	Known_gene	1	110184	112304	NW_018743363.1	+	2121	1074	XP_021774107.1|1.7e-63|uncharacterized protein LOC110738053 [Chenopodium quinoa]
LOC110738050	XM_021918416.1	Known_gene	1	135842	139472	NW_018742244.1	+	3631	1317	XP_021774108.1|8.7e-171|beta carbonic anhydrase 5, chloroplastic-like [Chenopodium quinoa]
LOC110738049	XM_021918414.1	Known_gene	1	85321	87193	NW_018743363.1	+	1873	1139	XP_021774106.1|1.0e-122|bifunctional TENA-E protein-like [Chenopodium quinoa]
LOC110738048	XM_021918413.1	Known_gene	1	87270	90498	NW_018743363.1	-	3229	1391	XP_021774105.1|9.2e-187|probable ubiquitin-like-specific protease 2A [Chenopodium quinoa]
LOC110738047	XM_021918412.1	Known_gene	1	80043	81372	NW_018743363.1	+	1330	947	XP_021774104.1|1.3e-99|jasmonate-induced protein homolog [Chenopodium quinoa]
LOC110738046	XM_021918411.1	Known_gene	1	75480	77935	NW_018743363.1	-	2456	1255	XP_021774103.1|6.8e-173|ubiquitin-conjugating enzyme E2 32-like [Chenopodium quinoa]
LOC110738045	XM_021918410.1	Known_gene	1	72018	75335	NW_018743363.1	+	3318	3317	XP_021774102.1|0.0e+00|LOW QUALITY PROTEIN: pentatricopeptide repeat-containing protein At4g39530-like [Chenopodium quinoa]
LOC110738044	XM_021918408.1,XM_021918409.1	Known_gene	2	65629	71387	NW_018743363.1	+	5759	3116	XP_021774101.1|5.9e-247|uncharacterized protein LOC110738044 isoform X2 [Chenopodium quinoa]
LOC110738043	XM_021918406.1	Known_gene	1	42292	43473	NW_018743363.1	-	1182	1182	XP_021774098.1|2.1e-184|probable carboxylesterase 7 [Chenopodium quinoa]
LOC110738041	XM_021918405.1	Known_gene	1	30859	32233	NW_018743363.1	+	1375	1375	XP_021774097.1|6.2e-204|protein EXORDIUM-like 3 [Chenopodium quinoa]
LOC110738040	XM_021918407.1	Known_gene	1	117593	121725	NW_018742244.1	+	4133	3002	XP_021774099.1|0.0e+00|protein SCARECROW 2-like [Chenopodium quinoa]
LOC110738039	XM_021918404.1	Known_gene	1	256504	257993	NW_018743363.1	+	1490	801	XP_021774096.1|6.0e-106|GTP-binding protein SAR1A-like [Chenopodium quinoa]
LOC110738038	XM_021918403.1	Known_gene	1	176431	178846	NW_018743363.1	-	2416	837	XP_021774095.1|4.3e-99|outer envelope pore protein 16-2, chloroplastic-like [Chenopodium quinoa]
LOC110738037	XM_021918402.1	Known_gene	1	23134	24111	NW_018743363.1	+	978	702	XP_021774094.1|7.1e-119|uncharacterized protein LOC110738037 [Chenopodium quinoa]
LOC110738036	XM_021918401.1	Known_gene	1	21218	22386	NW_018743363.1	+	1169	920	XP_021759638.1|3.2e-87|uncharacterized protein LOC110724524 [Chenopodium quinoa]
LOC110738034	XM_021918400.1	Known_gene	1	97534	98031	NW_018743363.1	-	498	498	XP_021774092.1|1.3e-87|bZIP transcription factor 53-like [Chenopodium quinoa]
LOC110738033	XM_021918399.1	Known_gene	1	82297	83938	NW_018743363.1	+	1642	678	OUS43456.1|5.7e-17|patched family-domain-containing protein [Ostreococcus tauri]
LOC110738031	BGI_novel_T005397,XM_021918398.1	Known_gene	2	42292	48986	NW_018743363.1	-	6695	6446	XP_021774090.1|5.6e-150|albumin-2-like [Chenopodium quinoa]
LOC110738030	XM_021918397.1	Known_gene	1	25007	25728	NW_018743363.1	-	722	632	XP_021774089.1|7.0e-102|uncharacterized protein LOC110738030 [Chenopodium quinoa]
LOC110738028	XM_021918396.1	Known_gene	1	665190	673448	NW_018743360.1	-	8259	2569	XP_021774088.1|5.6e-299|serine/threonine-protein kinase PBL27-like [Chenopodium quinoa]
LOC110738027	XM_021918395.1	Known_gene	1	103840	106720	NW_018742244.1	+	2881	2881	XP_021774087.1|0.0e+00|uncharacterized protein LOC110738027 [Chenopodium quinoa]
LOC110738026	BGI_novel_T005395,XM_021918393.1,XM_021918384.1,XM_021918387.1,XM_021918391.1,XM_021918385.1,BGI_novel_T005394,XM_021918392.1,XM_021918390.1,XM_021918394.1,XM_021918389.1,XM_021918386.1,XM_021918388.1	Known_gene	13	250944	294051	NW_018743360.1	-	43108	11209	XP_021774083.1|0.0e+00|chromatin structure-remodeling complex protein SYD-like isoform X8 [Chenopodium quinoa]
LOC110738024	XM_021918383.1	Known_gene	1	8469786	8471137	NW_018743792.1	+	1352	1163	XP_021715669.1|2.9e-133|uncharacterized protein LOC110683575 [Chenopodium quinoa]
LOC110738023	XM_021918381.1	Known_gene	1	21130	37300	NW_018743360.1	-	16171	3109	XP_021774073.1|0.0e+00|LOW QUALITY PROTEIN: squamosa promoter-binding-like protein 7 [Chenopodium quinoa]
LOC110738022	XM_021918380.1,XM_021918379.1	Known_gene	2	798281	3864903	NW_018745650.1	+	3066623	773	XP_021774071.1|4.3e-53|uncharacterized protein LOC110738022 isoform X1 [Chenopodium quinoa]
LOC110738021	XM_021918382.1	Known_gene	1	77165	80929	NW_018742244.1	+	3765	1142	XP_021774074.1|1.7e-109|uncharacterized protein LOC110738021 [Chenopodium quinoa]
LOC110738020	XM_021918378.1	Known_gene	1	734586	735371	NW_018743360.1	-	786	786	XP_021774070.1|6.7e-150|uncharacterized protein LOC110738020 [Chenopodium quinoa]
LOC110738019	XM_021918377.1	Known_gene	1	693858	695631	NW_018743360.1	+	1774	1068	XP_021774069.1|1.7e-209|uncharacterized protein LOC110738019 [Chenopodium quinoa]
LOC110738018	XM_021918376.1	Known_gene	1	691330	693323	NW_018743360.1	+	1994	1443	XP_021774068.1|1.2e-287|uncharacterized protein LOC110738018 [Chenopodium quinoa]
LOC110738017	XM_021918375.1	Known_gene	1	679213	681206	NW_018743360.1	+	1994	1443	XP_021774067.1|1.6e-287|uncharacterized protein LOC110738017 [Chenopodium quinoa]
LOC110738016	XM_021918374.1	Known_gene	1	639860	640510	NW_018743360.1	+	651	651	XP_021774066.1|2.8e-122|uncharacterized protein LOC110738016 [Chenopodium quinoa]
LOC110738015	XM_021918373.1	Known_gene	1	638169	639317	NW_018743360.1	+	1149	1149	XP_021774065.1|1.1e-222|glutathione S-transferase T3-like [Chenopodium quinoa]
LOC110738014	XM_021918371.1	Known_gene	1	481469	482872	NW_018743360.1	-	1404	723	XP_021774063.1|5.0e-136|uncharacterized protein LOC110738014 [Chenopodium quinoa]
LOC110738013	XM_021918370.1	Known_gene	1	330564	331109	NW_018743360.1	+	546	546	XP_021774062.1|7.0e-106|uncharacterized protein LOC110738013 [Chenopodium quinoa]
LOC110738012	XM_021918372.1	Known_gene	1	86204	89007	NW_018742244.1	-	2804	900	XP_021774064.1|6.7e-98|magnesium-dependent phosphatase 1-like [Chenopodium quinoa]
LOC110738010	XM_021918369.1	Known_gene	1	169049	169871	NW_018743360.1	-	823	537	XP_021774061.1|4.6e-102|protein FAR1-RELATED SEQUENCE 5-like [Chenopodium quinoa]
LOC110738008	XM_021918368.1	Known_gene	1	377342	378519	NW_018745247.1	+	1178	1005	XP_021774060.1|2.3e-187|uncharacterized protein LOC110738008 [Chenopodium quinoa]
LOC110738007	XM_021918367.1	Known_gene	1	43800	47277	NW_018743355.1	+	3478	641	XP_021714735.1|1.2e-77|uncharacterized protein LOC110682717 [Chenopodium quinoa]
LOC110738004	XM_021918365.1,XM_021918364.1,XM_021918363.1	Known_gene	3	124114	132555	NW_018743352.1	+	8442	2802	XP_021774055.1|0.0e+00|kinesin-like protein KIN-13B isoform X1 [Chenopodium quinoa]
LOC110738003	XM_021918362.1	Known_gene	1	104545	106077	NW_018743352.1	-	1533	1533	XP_021774054.1|1.1e-167|pyridoxal 5'-phosphate synthase-like subunit PDX1.2 [Chenopodium quinoa]
LOC110738002	XM_021918366.1	Known_gene	1	81044	86006	NW_018742244.1	+	4963	3894	XP_021774058.1|0.0e+00|uncharacterized protein At4g38062-like [Chenopodium quinoa]
LOC110738001	XM_021918361.1	Known_gene	1	97131	99975	NW_018743352.1	+	2845	1933	XP_021774053.1|4.4e-179|mitochondrial arginine transporter BAC2-like [Chenopodium quinoa]
LOC110738000	XM_021918360.1	Known_gene	1	90405	93389	NW_018743352.1	-	2985	963	XP_021774052.1|1.5e-82|protein AF-9-like [Chenopodium quinoa]
LOC110737999	XM_021918357.1,XM_021918359.1,XM_021918358.1,XM_021918356.1,XM_021918355.1	Known_gene	5	81100	84425	NW_018743352.1	-	3326	1337	XP_021774051.1|6.8e-121|MADS-box protein FBP24-like isoform X3 [Chenopodium quinoa]
LOC110737997	XM_021918352.1,XM_021918353.1	Known_gene	2	44159	48903	NW_018743352.1	-	4745	2801	XP_021774044.1|1.2e-294|uncharacterized protein LOC110737997 isoform X1 [Chenopodium quinoa]
LOC110737996	XM_021918351.1	Known_gene	1	36761	43677	NW_018743352.1	-	6917	1363	XP_021774043.1|2.4e-187|methyltransferase-like protein 22 [Chenopodium quinoa]
LOC110737995	XM_021918354.1	Known_gene	1	72748	76091	NW_018742244.1	-	3344	954	XP_021774046.1|3.3e-79|uncharacterized protein LOC110737995 [Chenopodium quinoa]
LOC110737994	XM_021918348.1,XM_021918349.1,XM_021918350.1	Known_gene	3	32720	36372	NW_018743352.1	-	3653	2212	XP_021774040.1|4.3e-231|B3 domain-containing protein Os11g0197600-like [Chenopodium quinoa]
LOC110737993	XM_021918347.1	Known_gene	1	28607	30592	NW_018743352.1	+	1986	831	XP_021714806.1|1.0e-84|protein BUD31 homolog 2 [Chenopodium quinoa]
LOC110737992	XM_021918346.1	Known_gene	1	20788	27886	NW_018743352.1	-	7099	2980	XP_021774038.1|0.0e+00|uncharacterized protein LOC110737992 [Chenopodium quinoa]
LOC110737991	XM_021918345.1	Known_gene	1	16890	19392	NW_018743352.1	-	2503	1184	XP_021774037.1|7.9e-123|uncharacterized protein LOC110737991 [Chenopodium quinoa]
LOC110737989	XM_021918344.1	Known_gene	1	59897	61027	NW_018743352.1	-	1131	1131	XP_021774036.1|7.6e-224|uncharacterized protein LOC110737989 [Chenopodium quinoa]
LOC110737988	XM_021918342.1	Known_gene	1	147916	158928	NW_018743348.1	-	11013	2639	XP_021774034.1|0.0e+00|SWI/SNF complex subunit SWI3C-like [Chenopodium quinoa]
LOC110737987	XM_021918340.1,XM_021918341.1	Known_gene	2	113775	141745	NW_018743348.1	-	27971	2691	XP_021774032.1|0.0e+00|peroxisome biogenesis protein 5-like [Chenopodium quinoa]
LOC110737986	XM_021918343.1	Known_gene	1	68471	72040	NW_018742244.1	-	3570	1746	XP_021774035.1|2.1e-244|beta-ureidopropionase-like [Chenopodium quinoa]
LOC110737985	XM_021918338.1,BGI_novel_T005392,XM_021918339.1	Known_gene	3	65465	96634	NW_018743348.1	-	31170	3923	XP_021774030.1|4.6e-273|chaperone protein dnaJ GFA2, mitochondrial-like [Chenopodium quinoa]
LOC110737984	XM_021918337.1	Known_gene	1	53955	61122	NW_018743348.1	+	7168	2145	XP_021774029.1|0.0e+00|WPP domain-interacting protein 1-like [Chenopodium quinoa]
LOC110737983	XM_021918336.1,BGI_novel_T005391,XM_021918334.1,XM_021918333.1,XM_021918335.1	Known_gene	5	13383	34421	NW_018743348.1	-	21039	2074	XP_028052334.1|2.0e-222|uncharacterized WD repeat-containing protein C2A9.03-like [Camellia sinensis]
LOC110737979	XM_021918330.1	Known_gene	1	1875	14738	NW_018743347.1	+	12864	1716	XP_021774022.1|4.2e-266|uncharacterized protein LOC110737979 [Chenopodium quinoa]
LOC110737978	XM_021918329.1	Known_gene	1	15934	19433	NW_018743345.1	+	3500	1908	XP_021766921.1|2.5e-251|F-box/kelch-repeat protein At3g23880-like [Chenopodium quinoa]
LOC110737976	BGI_novel_T000539,XM_021918332.1	Known_gene	2	60428	63561	NW_018742244.1	-	3134	1907	XP_021774024.1|4.0e-255|IAA-amino acid hydrolase ILR1-like 5 [Chenopodium quinoa]
LOC110737974	XM_021918326.1,XM_021918327.1,XM_021918324.1,XM_021918328.1	Known_gene	4	1751543	1772458	NW_018743332.1	-	20916	3070	XP_021774016.1|0.0e+00|phosphatidylinositol 4-phosphate 5-kinase 7-like [Chenopodium quinoa]
LOC110737970	XM_021918325.1	Known_gene	1	55285	60599	NW_018742244.1	+	5315	3077	XP_021774017.1|0.0e+00|pentatricopeptide repeat-containing protein At1g62590-like [Chenopodium quinoa]
LOC110737969	XM_021918323.1,XM_021918321.1,XM_021918320.1,XM_021918322.1,BGI_novel_T005385,BGI_novel_T005386	Known_gene	6	1065438	1071364	NW_018743332.1	+	5927	2676	XP_021774014.1|2.8e-138|uncharacterized protein At1g10890-like isoform X2 [Chenopodium quinoa]
LOC110737968	XM_021918319.1	Known_gene	1	14856	16043	NW_018745480.1	+	1188	924	XP_021725243.1|2.6e-129|uncharacterized protein LOC110692516 [Chenopodium quinoa]
LOC110737967	XM_021918316.1,XM_021918317.1,XM_021918315.1,XM_021918318.1,XM_021918313.1,XM_021918312.1	Known_gene	6	781581	788749	NW_018743332.1	-	7169	3923	XP_021774004.1|2.0e-290|protein FAR1-RELATED SEQUENCE 5-like isoform X1 [Chenopodium quinoa]
LOC110737966	XM_021918311.1	Known_gene	1	761252	765194	NW_018743332.1	+	3943	3021	XP_021774003.1|0.0e+00|protein FAR1-RELATED SEQUENCE 5-like [Chenopodium quinoa]
LOC110737965	XM_021918314.1,BGI_novel_T000538	Known_gene	2	43850	45863	NW_018742244.1	+	2014	1314	XP_021774006.1|1.0e-138|nicotinamidase 1-like [Chenopodium quinoa]
LOC110737964	XM_021918310.1	Known_gene	1	666123	673992	NW_018743332.1	+	7870	2333	XP_021774002.1|2.1e-305|protein RETICULATA-RELATED 1, chloroplastic-like [Chenopodium quinoa]
LOC110737963	BGI_novel_T005384,XM_021918309.1	Known_gene	2	389889	415723	NW_018743332.1	-	25835	4415	XP_021774001.1|0.0e+00|potassium channel AKT2/3-like [Chenopodium quinoa]
LOC110737962	XM_021918307.1,XM_021918308.1	Known_gene	2	375127	389442	NW_018743332.1	+	14316	2042	XP_021774000.1|7.0e-236|origin of replication complex subunit 4-like isoform X2 [Chenopodium quinoa]
LOC110737961	XM_021918305.1,XM_021918304.1,XM_021918306.1	Known_gene	3	308878	321539	NW_018743332.1	+	12662	1484	XP_021773996.1|3.0e-196|protein EI24 homolog isoform X1 [Chenopodium quinoa]
LOC110737959	XM_021918303.1,BGI_novel_T005383	Known_gene	2	150569	155218	NW_018743332.1	+	4650	1992	XP_021773995.1|2.0e-260|multiple organellar RNA editing factor 1, mitochondrial-like [Chenopodium quinoa]
LOC110737958	XM_021918301.1	Known_gene	1	1290776	1293076	NW_018743332.1	+	2301	1584	XP_021773993.1|6.5e-205|uncharacterized protein LOC110737958 [Chenopodium quinoa]
LOC110737956	XM_021918331.1	Known_gene	1	17669344	17671328	NW_018742204.1	-	1985	747	XP_021774023.1|1.0e-139|uncharacterized protein LOC110737956 [Chenopodium quinoa]
LOC110737955	XM_021918300.1	Known_gene	1	2069891	2070742	NW_018743332.1	-	852	852	XP_021773992.1|6.5e-159|uncharacterized protein LOC110737955 [Chenopodium quinoa]
LOC110737954	XM_021918299.1	Known_gene	1	1949335	1950669	NW_018743332.1	+	1335	1179	XP_021773991.1|1.5e-222|uncharacterized protein LOC110737954 [Chenopodium quinoa]
LOC110737953	XM_021918298.1	Known_gene	1	1946650	1947654	NW_018743332.1	+	1005	1005	XP_021773990.1|3.7e-198|uncharacterized protein LOC110737953 [Chenopodium quinoa]
LOC110737951	XM_021918302.1,XM_021918297.1	Known_gene	2	45812	54176	NW_018742244.1	-	8365	2794	XP_021773989.1|0.0e+00|protein EXECUTER 1, chloroplastic-like [Chenopodium quinoa]
LOC110737950	XM_021918296.1	Known_gene	1	342951	344968	NW_018743332.1	-	2018	1902	XP_021773988.1|0.0e+00|uncharacterized protein LOC110737950 [Chenopodium quinoa]
LOC110737949	XM_021918295.1	Known_gene	1	132687	134897	NW_018743332.1	-	2211	1677	XP_021773987.1|0.0e+00|uncharacterized protein LOC110737949 [Chenopodium quinoa]
LOC110737945	XM_021918293.1	Known_gene	1	1017989	1018873	NW_018743331.1	+	885	885	XP_021773985.1|1.2e-168|uncharacterized protein LOC110737945 [Chenopodium quinoa]
LOC110737944	XM_021918292.1	Known_gene	1	826030	827469	NW_018743331.1	+	1440	1440	XP_021773984.1|1.0e-297|uncharacterized protein LOC110737944 [Chenopodium quinoa]
LOC110737943	XM_021918294.1	Known_gene	1	29063	29922	NW_018742244.1	+	860	860	XP_021773986.1|1.9e-73|VQ motif-containing protein 10 [Chenopodium quinoa]
LOC110737942	XM_021918291.1	Known_gene	1	800257	802255	NW_018743331.1	-	1999	1659	XP_021773983.1|0.0e+00|uncharacterized protein LOC110737942 [Chenopodium quinoa]
LOC110737941	XM_021918290.1	Known_gene	1	756383	758554	NW_018743331.1	+	2172	984	XP_021773982.1|1.4e-184|uncharacterized protein LOC110737941 [Chenopodium quinoa]
LOC110737940	XM_021918289.1	Known_gene	1	701727	702984	NW_018743331.1	-	1258	1074	XP_021773981.1|1.7e-209|uncharacterized protein LOC110737940 [Chenopodium quinoa]
LOC110737939	XM_021918288.1	Known_gene	1	683303	684686	NW_018743331.1	+	1384	1200	XP_021773980.1|6.6e-234|protein ALP1-like [Chenopodium quinoa]
LOC110737938	XM_021918287.1	Known_gene	1	645116	647301	NW_018743331.1	-	2186	1008	XP_021773979.1|1.6e-193|uncharacterized protein LOC110737938 [Chenopodium quinoa]
LOC110737937	XM_021918286.1	Known_gene	1	449530	450420	NW_018743331.1	-	891	891	XP_021773978.1|2.0e-174|uncharacterized protein LOC110737937 [Chenopodium quinoa]
LOC110737936	XM_021918284.1	Known_gene	1	379841	381777	NW_018743331.1	-	1937	1185	XP_021773976.1|1.1e-233|protein FAR1-RELATED SEQUENCE 5-like [Chenopodium quinoa]
LOC110737935	XM_021918283.1	Known_gene	1	379065	379820	NW_018743331.1	+	756	756	XP_021773975.1|2.8e-145|protein MAIN-LIKE 1-like [Chenopodium quinoa]
LOC110737934	XM_021918285.1	Known_gene	1	34355	37206	NW_018742244.1	-	2852	1071	XP_021773977.1|4.8e-159|uncharacterized protein LOC110737934 [Chenopodium quinoa]
LOC110737933	XM_021918282.1	Known_gene	1	251972	253501	NW_018743331.1	+	1530	1404	XP_021773974.1|5.7e-277|uncharacterized protein LOC110737933 [Chenopodium quinoa]
LOC110737932	XM_021918281.1	Known_gene	1	185924	198258	NW_018743331.1	+	12335	948	XP_021773973.1|5.3e-178|peroxidase 57-like [Chenopodium quinoa]
LOC110737931	XM_021918280.1	Known_gene	1	181517	185186	NW_018743331.1	+	3670	1178	XP_021773972.1|3.3e-177|peroxidase 57-like [Chenopodium quinoa]
LOC110737930	XM_021918279.1	Known_gene	1	129889	130956	NW_018743331.1	-	1068	963	XP_021773971.1|4.1e-186|uncharacterized protein LOC110737930 [Chenopodium quinoa]
LOC110737929	XM_021918277.1	Known_gene	1	126668	127507	NW_018743331.1	-	840	840	XP_021773969.1|1.4e-161|uncharacterized protein LOC110737929 [Chenopodium quinoa]
LOC110737928	XM_021918278.1	Known_gene	1	30381	34251	NW_018742244.1	-	3871	2093	XP_021773970.1|3.6e-219|ADP-glucose phosphorylase-like [Chenopodium quinoa]
LOC110737927	XM_021918276.1,BGI_novel_T005382,XM_021918275.1	Known_gene	3	10835849	10852514	NW_018743331.1	+	16666	2576	XP_021773967.1|0.0e+00|phosphoglucan phosphatase LSF1, chloroplastic-like isoform X1 [Chenopodium quinoa]
LOC110737926	XM_021918273.1,XM_021918274.1	Known_gene	2	10670894	10692490	NW_018743331.1	-	21597	1858	XP_021773965.1|7.8e-242|uncharacterized protein LOC110737926 [Chenopodium quinoa]
LOC110737924	XM_021918272.1,XM_021918271.1	Known_gene	2	10470707	10489757	NW_018743331.1	+	19051	1515	XP_021773963.1|7.1e-217|uncharacterized protein LOC110737924 isoform X1 [Chenopodium quinoa]
LOC110737923	XM_021918268.1,XM_021918270.1,BGI_novel_T005381	Known_gene	3	10409911	10417186	NW_018743331.1	+	7276	1858	XP_021773960.1|1.3e-226|monodehydroascorbate reductase 4, peroxisomal-like isoform X1 [Chenopodium quinoa]
LOC110737922	XM_021918267.1	Known_gene	1	10352066	10353176	NW_018743331.1	-	1111	1111	XP_021773959.1|1.6e-101|mitochondrial import inner membrane translocase subunit TIM23-2-like [Chenopodium quinoa]
LOC110737921	XM_021918269.1	Known_gene	1	20005	22982	NW_018742244.1	-	2978	1583	XP_021773961.1|7.4e-225|fructose-1,6-bisphosphatase, chloroplastic-like [Chenopodium quinoa]
LOC110737920	XM_021918266.1	Known_gene	1	10335920	10337148	NW_018743331.1	-	1229	1148	XP_021755870.1|1.0e-143|serine/threonine-protein phosphatase 7 long form homolog [Chenopodium quinoa]
LOC110737919	XM_021918265.1	Known_gene	1	10304243	10324497	NW_018743331.1	+	20255	3917	XP_021773957.1|0.0e+00|probable phospholipid-transporting ATPase 8 [Chenopodium quinoa]
LOC110737917	XM_021918264.1	Known_gene	1	10079763	10092638	NW_018743331.1	-	12876	1799	XP_021773956.1|8.1e-220|magnesium transporter MRS2-I-like [Chenopodium quinoa]
LOC110737916	XM_021918263.1	Known_gene	1	9993978	9994905	NW_018743331.1	-	928	928	XP_021773955.1|1.2e-97|50S ribosomal protein L12, chloroplastic [Chenopodium quinoa]
LOC110737915	XM_021918262.1	Known_gene	1	9923798	9943138	NW_018743331.1	-	19341	2075	XP_021773954.1|0.0e+00|organic cation/carnitine transporter 1-like [Chenopodium quinoa]
LOC110737914	XM_021918261.1	Known_gene	1	9870771	9889034	NW_018743331.1	-	18264	7144	XP_021773953.1|0.0e+00|putative callose synthase 8 [Chenopodium quinoa]
LOC110737913	XM_021918259.1	Known_gene	1	9734206	9741967	NW_018743331.1	+	7762	1442	XP_021773951.1|6.2e-170|persulfide dioxygenase ETHE1 homolog, mitochondrial-like [Chenopodium quinoa]
LOC110737912	XM_021918258.1	Known_gene	1	9672529	9685288	NW_018743331.1	-	12760	2872	XP_021773950.1|0.0e+00|C2 domain-containing protein At1g53590-like [Chenopodium quinoa]
LOC110737911	XM_021918257.1	Known_gene	1	9660293	9669210	NW_018743331.1	-	8918	1880	XP_021773949.1|3.8e-111|uncharacterized protein LOC110737911 [Chenopodium quinoa]
[truncated: 52,624 more rows]
