# Supplementary material for: Transcriptome and Small RNA Sequencing Reveals the Basis of Response to Salinity, Alkalinity and Hypertonia in Quinoa (Chenopodium quinoa Willd.)
Source: Int J Mol Sci. 2023 Jul 22;24(14):11789. doi: 10.3390/ijms241411789 (PMC10380837; doi:10.3390/ijms241411789)
Supplement: Supplementary file 1 [file ijms-24-11789-s001.zip › Tab.S3 Differential expression of quinoa genes.xls]

## Sheet: saline only
gene_id_alias	gene_transcript_id	average_fpkm_saline	average_fpkm_PEG	average_fpkm_alkaline	average_fpkm_CK	diffexp_log2fc_CK-vs-alkaline	diffexp_deseq2_qvalue_CK-vs-alkaline	diffexp_pvalue_CK-vs-alkaline	diffexp_log2fc_CK-vs-PEG	diffexp_deseq2_qvalue_CK-vs-PEG	diffexp_pvalue_CK-vs-PEG	diffexp_log2fc_CK-vs-saline	diffexp_deseq2_qvalue_CK-vs-saline	diffexp_pvalue_CK-vs-saline	desc_tf	desc_kegg	desc_nr	desc_go
LOC110681677	XM_021857816.1	0.193	0.01	0.043	0.01	0.548308	0.783977	0.381618	0.00791717	0.998482	0.984856	2.93088	0.0072152	0.00137103	NA	K20043//clathrin coat assembly protein AP180;K20044//phosphatidylinositol-binding clathrin assembly protein	XP_021713508.1|0.0e+00|putative clathrin assembly protein At4g02650 [Chenopodium quinoa]	GO:0043933//protein-containing complex subunit organization;GO:0048268//clathrin coat assembly;GO:0009987//cellular process;GO:0065003//protein-containing complex assembly;GO:0071840//cellular component organization or biogenesis;GO:0034622//cellular protein-containing complex assembly;GO:0022607//cellular component assembly;GO:0016043//cellular component organization;GO:0044085//cellular compone…
LOC110681715	XM_021857844.1	8.753	0.18	0.193	0.033	0.873529	0.605011	0.204668	1.35784	0.351299	0.0609342	7.1538	5.59347e-31	4.60957e-33	AP2-EREBP	K09286//EREBP-like factor	XP_021713536.1|3.8e-148|ethylene-responsive transcription factor ERF109-like [Chenopodium quinoa]	GO:0043227//membrane-bounded organelle;GO:0110165//cellular anatomical entity;GO:0005622//intracellular;GO:0005634//nucleus;GO:0043226//organelle;GO:0043231//intracellular membrane-bounded organelle;GO:0043229//intracellular organelle;GO:0140110//transcription regulator activity;GO:0097159//organic cyclic compound binding;GO:0003700//DNA-binding transcription factor activity;GO:0003677//DNA bindi…
LOC110681722	XM_021857849.1	1.976	0.393	1.08	0.393	1.09085	0.383979	0.0834993	0.0690765	0.98849	0.919875	2.23239	0.00325393	0.00054718	NA	K01762//1-aminocyclopropane-1-carboxylate synthase [EC:4.4.1.14]+ko01100//Metabolic pathways+ko01110//Biosynthesis of secondary metabolites+ko00270//Cysteine and methionine metabolism	XP_021713541.1|2.6e-274|1-aminocyclopropane-1-carboxylate synthase 9-like [Chenopodium quinoa]	GO:0009058//biosynthetic process;GO:0008152//metabolic process;GO:0030170//pyridoxal phosphate binding;GO:0016829//lyase activity;GO:0016846//carbon-sulfur lyase activity;GO:0097159//organic cyclic compound binding;GO:0043167//ion binding;GO:0036094//small molecule binding;GO:0003824//catalytic activity;GO:0016847//1-aminocyclopropane-1-carboxylate synthase activity;GO:0070279//vitamin B6 binding…
LOC110681733	XM_021857860.1	0.236	0.013	0.066	0	1.03377	0.448203	0.112503	0.121987	0.919583	0.672753	3.06831	0.00853269	0.00166616	NA	K04733//interleukin-1 receptor-associated kinase 4 [EC:2.7.11.1]	XP_021713552.1|1.4e-294|putative wall-associated receptor kinase-like 11 [Chenopodium quinoa]	NA
LOC110681742	XM_021857868.1	1.436	0.556	0.6	0.69	-0.123375	0.918244	0.730657	-0.195545	0.919583	0.567676	1.22933	0.00261775	0.000426233	NA	K19613//leucine-rich repeat protein SHOC2;K15078//structure-specific endonuclease subunit SLX1 [EC:3.6.1.-]	XP_021713560.1|0.0e+00|putative disease resistance protein RGA3 [Chenopodium quinoa]	NA
LOC110681780	XM_021857906.1	1.71	0.323	0.283	0.253	0.148525	0.952786	0.834948	0.282883	0.921997	0.697068	2.4798	0.00480599	0.000858619	NA	K11294//nucleolin;K10406//kinesin family member C2/C3	XP_021713598.1|1.3e-113|uncharacterized protein LOC110681780 [Chenopodium quinoa]	NA
LOC110681825	XM_021857953.1	42.463	6.57	14.546	7.71	0.973503	0.000161576	2.63805e-06	-0.114009	0.919583	0.656345	2.64589	6.90394e-32	5.42002e-34	NA	K00059//3-oxoacyl-[acyl-carrier protein] reductase [EC:1.1.1.100]+ko01100//Metabolic pathways+ko00061//Fatty acid biosynthesis+ko01212//Fatty acid metabolism+ko00780//Biotin metabolism;K13237//peroxisomal 2,4-dienoyl-CoA reductase [EC:1.3.1.34]+ko04146//Peroxisome	XP_021713645.1|3.7e-148|uncharacterized protein LOC110681825 [Chenopodium quinoa]	NA
LOC110681913	XM_021858071.1,XM_021858072.1,XM_021858070.1	44.3	28.286	28.383	16.836	0.802775	0.020391	0.000961432	0.850826	0.000782984	2.26753e-05	1.58805	5.46168e-13	1.68549e-14	NA	K00512//steroid 17alpha-monooxygenase / 17alpha-hydroxyprogesterone deacetylase [EC:1.14.14.19 1.14.14.32]+ko01100//Metabolic pathways;K07409//cytochrome P450 family 1 subfamily A polypeptide 2 [EC:1.14.14.1]+ko00380//Tryptophan metabolism+ko00232//Caffeine metabolism+ko00591//Linoleic acid metabolism+ko01100//Metabolic pathways+ko01110//Biosynthesis of secondary metabolites;K00512//steroid 17alp…	XP_021713762.1|1.0e-300|cytochrome P450 89A2-like [Chenopodium quinoa]	GO:0043169//cation binding;GO:1901363//heterocyclic compound binding;GO:0046906//tetrapyrrole binding;GO:0097159//organic cyclic compound binding;GO:0004497//monooxygenase activity;GO:0046914//transition metal ion binding;GO:0003824//catalytic activity;GO:0043167//ion binding;GO:0046872//metal ion binding;GO:0016491//oxidoreductase activity;GO:0020037//heme binding;GO:0005488//binding;GO:0005506/…
LOC110681915	XM_021858085.1,BGI_novel_T005964,XM_021858083.1,XM_021858084.1,XM_021858074.1,XM_021858077.1,XM_021858076.1,BGI_novel_T005961,XM_021858078.1,BGI_novel_T005963,BGI_novel_T005962,BGI_novel_T005959,BGI_novel_T005966,XM_021858082.1,XM_021858079.1,XM_021858075.1,BGI_novel_T005965,XM_021858081.1,BGI_novel_T005960	3.286	2.003	2.11	1.786	0.328491	0.783977	0.37929	0.27123	0.912728	0.527874	1.06743	0.0114959	0.00235922	NA	K15255//ATP-dependent DNA helicase PIF1 [EC:3.6.4.12];K07466//replication factor A1+ko03420//Nucleotide excision repair+ko03030//DNA replication+ko03440//Homologous recombination+ko03430//Mismatch repair;K15255//ATP-dependent DNA helicase PIF1 [EC:3.6.4.12];K07466//replication factor A1+ko03420//Nucleotide excision repair+ko03030//DNA replication+ko03440//Homologous recombination+ko03430//Mismatc…	XP_021713766.1|0.0e+00|uncharacterized protein LOC110681915 isoform X1 [Chenopodium quinoa]	NA
LOC110681917	XM_021858088.1,XM_021858087.1,XM_021858086.1	0.493	0.193	0.163	0.163	0.016555	0.999966	0.979205	0.316663	0.919583	0.590558	1.7758	0.00413405	0.00072127	NA	K07466//replication factor A1+ko03420//Nucleotide excision repair+ko03030//DNA replication+ko03440//Homologous recombination+ko03430//Mismatch repair;K07466//replication factor A1+ko03420//Nucleotide excision repair+ko03030//DNA replication+ko03440//Homologous recombination+ko03430//Mismatch repair;K07466//replication factor A1+ko03420//Nucleotide excision repair+ko03030//DNA replication+ko03440/…	XP_021713778.1|0.0e+00|replication protein A 70 kDa DNA-binding subunit D-like isoform X1 [Chenopodium quinoa]	NA
LOC110681941	XM_021858123.1	21.703	13.633	16.2	10.716	0.668213	0.00710969	0.000245488	0.457361	0.185076	0.0223831	1.22721	7.32017e-08	4.32438e-09	NA	K22989//integral membrane protein GPR137	XP_021713815.1|3.0e-164|protein TOM THREE HOMOLOG 1 [Chenopodium quinoa]	GO:0031224//intrinsic component of membrane;GO:0110165//cellular anatomical entity;GO:0016021//integral component of membrane;GO:0016020//membrane;
LOC110681944	XM_021858127.1,XM_021858128.1	3.583	1.313	1.11	0.703	0.635155	0.65872	0.249071	0.777241	0.664745	0.209869	2.32122	0.000607403	8.10643e-05	NA	K16871//4-aminobutyrate---pyruvate transaminase [EC:2.6.1.96]+ko00250//Alanine, aspartate and glutamate metabolism+ko01100//Metabolic pathways+ko00650//Butanoate metabolism;K16871//4-aminobutyrate---pyruvate transaminase [EC:2.6.1.96]+ko00250//Alanine, aspartate and glutamate metabolism+ko01100//Metabolic pathways+ko00650//Butanoate metabolism	XP_021843567.1|3.6e-248|probable gamma-aminobutyrate transaminase 3, mitochondrial [Spinacia oleracea]	GO:0016769//transferase activity, transferring nitrogenous groups;GO:0043168//anion binding;GO:0070279//vitamin B6 binding;GO:0019842//vitamin binding;GO:0036094//small molecule binding;GO:0005488//binding;GO:0097159//organic cyclic compound binding;GO:0043167//ion binding;GO:0030170//pyridoxal phosphate binding;GO:0016740//transferase activity;GO:0003824//catalytic activity;GO:0008483//transamin…
LOC110681951	XM_021858137.1	1.916	1.776	1.573	1.003	0.696769	0.262111	0.0422292	0.885817	0.0967733	0.00872357	1.10764	0.0225631	0.00522205	NA	K00423//L-ascorbate oxidase [EC:1.10.3.3]+ko01100//Metabolic pathways+ko00053//Ascorbate and aldarate metabolism	XP_021713829.1|3.1e-274|LOW QUALITY PROTEIN: putative FBD-associated F-box protein At5g38570 [Chenopodium quinoa]	NA
LOC110681990	XM_021858188.1	0.786	0.05	0.773	0.186	1.4636	0.208264	0.0284307	-0.864297	0.699315	0.237229	1.97233	0.015299	0.00329895	NA	K00166//2-oxoisovalerate dehydrogenase E1 component alpha subunit [EC:1.2.4.4]+ko00280//Valine, leucine and isoleucine degradation+ko00640//Propanoate metabolism+ko01100//Metabolic pathways+ko01110//Biosynthesis of secondary metabolites	XP_021713880.1|9.1e-266|2-oxoisovalerate dehydrogenase subunit alpha 2, mitochondrial-like [Chenopodium quinoa]	GO:0016624//oxidoreductase activity, acting on the aldehyde or oxo group of donors, disulfide as acceptor;GO:0016903//oxidoreductase activity, acting on the aldehyde or oxo group of donors;GO:0016491//oxidoreductase activity;GO:0003824//catalytic activity;
LOC110682020	XM_021858225.1	10.26	7.806	6.203	5.546	0.232608	0.763708	0.357074	0.593851	0.107124	0.0100954	1.10101	2.5166e-05	2.38447e-06	NA	K20725//MAP kinase substrate 1+ko04016//MAPK signaling pathway - plant	XP_021713917.1|3.7e-129|protein MKS1-like [Chenopodium quinoa]	NA
LOC110682030	XM_021858237.1	26.116	3.27	3.416	5.466	-0.560024	0.410264	0.0945015	-0.584386	0.453643	0.0942293	2.43611	2.0666e-19	3.53613e-21	NA	K19040//E3 ubiquitin-protein ligase ATL10/75/76/77/78 [EC:2.3.2.27]	XP_021713929.1|1.7e-141|RING-H2 finger protein ATL78-like [Chenopodium quinoa]	NA
LOC110682045	BGI_novel_T005988,XM_021858255.1	4.853	2.146	2.24	1.84	0.348703	0.78997	0.395588	0.306456	0.877185	0.461046	1.55374	0.00253829	0.000411368	NA	K17500//integrin-linked kinase-associated serine/threonine phosphatase 2C [EC:3.1.3.16];K06268//serine/threonine-protein phosphatase 2B regulatory subunit;K17500//integrin-linked kinase-associated serine/threonine phosphatase 2C [EC:3.1.3.16];K06268//serine/threonine-protein phosphatase 2B regulatory subunit	XP_021713947.1|2.1e-205|WAT1-related protein At5g64700-like [Chenopodium quinoa]	GO:0031224//intrinsic component of membrane;GO:0110165//cellular anatomical entity;GO:0016021//integral component of membrane;GO:0016020//membrane;GO:0071944//cell periphery;GO:0005886//plasma membrane;GO:0022857//transmembrane transporter activity;GO:0005215//transporter activity;
LOC110682080	XM_021858315.1	97.323	26.1	31.04	17.39	0.897441	0.00739129	0.000257736	0.684583	0.0962175	0.0086566	2.66999	1.741e-23	2.17479e-25	NA	K02941//large subunit ribosomal protein LP0+ko03010//Ribosome;K22733//magnesium transporter	XP_021714007.1|1.0e-297|uncharacterized protein At1g04910-like [Chenopodium quinoa]	NA
LOC110682095	XM_021858334.1	2.966	1.72	0.973	1.02	0.0347479	0.988593	0.929973	0.820488	0.173252	0.0203087	1.72014	1.59284e-06	1.16999e-07	NA	K21444//poly(rC)-binding protein 3/4	XP_021728202.1|1.2e-252|KH domain-containing protein HEN4-like isoform X1 [Chenopodium quinoa]	GO:0003676//nucleic acid binding;GO:1901363//heterocyclic compound binding;GO:0097159//organic cyclic compound binding;GO:0003723//RNA binding;GO:0005488//binding;
LOC110682096	XM_021858335.1	4.68	1.81	3.483	2.236	0.653496	0.426078	0.101813	-0.183108	0.919583	0.60436	1.23507	0.0032858	0.000553322	NA	K01662//1-deoxy-D-xylulose-5-phosphate synthase [EC:2.2.1.7]+ko00900//Terpenoid backbone biosynthesis+ko01100//Metabolic pathways+ko01110//Biosynthesis of secondary metabolites+ko00730//Thiamine metabolism	XP_021859037.1|0.0e+00|probable 1-deoxy-D-xylulose-5-phosphate synthase 2, chloroplastic [Spinacia oleracea]	GO:0008299//isoprenoid biosynthetic process;GO:0008610//lipid biosynthetic process;GO:0006721//terpenoid metabolic process;GO:0044249//cellular biosynthetic process;GO:0044255//cellular lipid metabolic process;GO:0044237//cellular metabolic process;GO:0008152//metabolic process;GO:0006720//isoprenoid metabolic process;GO:0009058//biosynthetic process;GO:0009987//cellular process;GO:0044238//prima…
LOC110682113	XM_021858356.1,XM_021858355.1,BGI_novel_T006007,BGI_novel_T006008,XM_021858357.1	51.61	27.526	31.343	22.673	0.490166	0.314946	0.058204	0.357738	0.420158	0.0823258	1.35789	6.79107e-10	2.97204e-11	NA	K01381//saccharopepsin [EC:3.4.23.25];K01379//cathepsin D [EC:3.4.23.5];K00924//kinase [EC:2.7.1.-];K01381//saccharopepsin [EC:3.4.23.25];K01379//cathepsin D [EC:3.4.23.5];K00924//kinase [EC:2.7.1.-];K01381//saccharopepsin [EC:3.4.23.25];K01379//cathepsin D [EC:3.4.23.5];K00924//kinase [EC:2.7.1.-];K01381//saccharopepsin [EC:3.4.23.25];K01379//cathepsin D [EC:3.4.23.5];K01381//saccharopepsin [EC:…	XP_021714047.1|0.0e+00|aspartyl protease family protein 1-like isoform X1 [Chenopodium quinoa]	GO:0008152//metabolic process;GO:0044238//primary metabolic process;GO:0009057//macromolecule catabolic process;GO:1901564//organonitrogen compound metabolic process;GO:0009056//catabolic process;GO:1901565//organonitrogen compound catabolic process;GO:0043170//macromolecule metabolic process;GO:0006508//proteolysis;GO:1901575//organic substance catabolic process;GO:0071704//organic substance met…
LOC110682124	XM_021858373.1	85.89	54.173	69.206	44.643	0.684622	0.0820074	0.00663567	0.390173	0.0358339	0.00230916	1.13285	0.00147931	0.000223031	NA	K00021//hydroxymethylglutaryl-CoA reductase (NADPH) [EC:1.1.1.34]+ko00900//Terpenoid backbone biosynthesis+ko01100//Metabolic pathways+ko01110//Biosynthesis of secondary metabolites	XP_021714065.1|0.0e+00|3-hydroxy-3-methylglutaryl-coenzyme A reductase-like [Chenopodium quinoa]	GO:0044249//cellular biosynthetic process;GO:0019637//organophosphate metabolic process;GO:0015936//coenzyme A metabolic process;GO:1901360//organic cyclic compound metabolic process;GO:0008299//isoprenoid biosynthetic process;GO:0006163//purine nucleotide metabolic process;GO:0006629//lipid metabolic process;GO:0009058//biosynthetic process;GO:0009987//cellular process;GO:0044281//small molecule…
LOC110682153	XM_021858410.1	11.483	7.236	7.056	4.58	0.695484	0.0506298	0.00327394	0.754655	0.0371353	0.00242096	1.54377	9.27627e-11	3.64927e-12	NA	K08852//serine/threonine-protein kinase/endoribonuclease IRE1 [EC:2.7.11.1 3.1.26.-]+ko04141//Protein processing in endoplasmic reticulum	XP_021714102.1|0.0e+00|serine/threonine-protein kinase/endoribonuclease IRE1a-like [Chenopodium quinoa]	GO:0006725//cellular aromatic compound metabolic process;GO:0006396//RNA processing;GO:0044238//primary metabolic process;GO:0008152//metabolic process;GO:0046483//heterocycle metabolic process;GO:0034641//cellular nitrogen compound metabolic process;GO:0010467//gene expression;GO:0090304//nucleic acid metabolic process;GO:1901360//organic cyclic compound metabolic process;GO:0043170//macromolecu…
LOC110682157	XM_021858413.1	40.496	15.903	22.406	21.643	0.138515	0.825692	0.449933	-0.323781	0.430098	0.0857011	1.12405	6.75489e-10	2.95474e-11	NA	K14209//solute carrier family 36 (proton-coupled amino acid transporter)	XP_021714105.1|3.4e-243|amino acid transporter AVT3C-like [Chenopodium quinoa]	GO:0110165//cellular anatomical entity;GO:0016020//membrane;GO:0031224//intrinsic component of membrane;GO:0016021//integral component of membrane;
LOC110682165	XM_021858422.1	20.436	12.956	16.273	11.34	0.580377	0.0998633	0.00883804	0.301952	0.751356	0.284194	1.06594	5.69472e-08	3.3061e-09	NA	K18490//homeobox protein OTX2;K09326//homeobox protein OTX1;K14292//trimethylguanosine synthase [EC:2.1.1.-]+ko03013//RNA transport	XP_021714114.1|8.0e-163|WUSCHEL-related homeobox 8-like [Chenopodium quinoa]	GO:0043226//organelle;GO:0005622//intracellular;GO:0110165//cellular anatomical entity;GO:0043231//intracellular membrane-bounded organelle;GO:0043229//intracellular organelle;GO:0043227//membrane-bounded organelle;GO:0005634//nucleus;GO:0003677//DNA binding;GO:0005488//binding;GO:0003676//nucleic acid binding;GO:1901363//heterocyclic compound binding;GO:0097159//organic cyclic compound binding;
LOC110682179	XM_021858444.1	78.613	6.45	7.87	10.976	-0.345066	0.849627	0.484898	-0.579372	0.624294	0.180112	2.93347	3.90202e-10	1.6696e-11	NA	K00423//L-ascorbate oxidase [EC:1.10.3.3]+ko01100//Metabolic pathways+ko00053//Ascorbate and aldarate metabolism	XP_021714136.1|0.0e+00|L-ascorbate oxidase-like [Chenopodium quinoa]	GO:0005576//extracellular region;GO:0110165//cellular anatomical entity;GO:0046914//transition metal ion binding;GO:0003824//catalytic activity;GO:0016491//oxidoreductase activity;GO:0046872//metal ion binding;GO:0005507//copper ion binding;GO:0005488//binding;GO:0043167//ion binding;GO:0043169//cation binding;
LOC110682186	XM_021858454.1	251.966	119.063	106.426	90.426	0.304919	0.709631	0.295903	0.496981	0.43563	0.0876892	1.6709	3.80297e-06	3.01938e-07	NA	K01858//myo-inositol-1-phosphate synthase [EC:5.5.1.4]+ko01100//Metabolic pathways+ko00562//Inositol phosphate metabolism	XP_021714146.1|7.4e-297|inositol-3-phosphate synthase-like [Chenopodium quinoa]	GO:0008152//metabolic process;GO:0006796//phosphate-containing compound metabolic process;GO:0090407//organophosphate biosynthetic process;GO:1901615//organic hydroxy compound metabolic process;GO:1901617//organic hydroxy compound biosynthetic process;GO:0016051//carbohydrate biosynthetic process;GO:0009058//biosynthetic process;GO:0044237//cellular metabolic process;GO:0019637//organophosphate m…
LOC110682188	XM_021858455.1	14.146	10.323	14.593	7.73	0.962373	0.0807462	0.0064861	0.516187	0.419093	0.0819599	1.08172	0.00140584	0.000210521	NA	K00232//acyl-CoA oxidase [EC:1.3.3.6]+ko04146//Peroxisome+ko00592//alpha-Linolenic acid metabolism+ko01100//Metabolic pathways+ko01110//Biosynthesis of secondary metabolites+ko01212//Fatty acid metabolism+ko01040//Biosynthesis of unsaturated fatty acids+ko00071//Fatty acid degradation	XP_021714147.1|0.0e+00|acyl-coenzyme A oxidase 2, peroxisomal-like [Chenopodium quinoa]	GO:0006631//fatty acid metabolic process;GO:0044281//small molecule metabolic process;GO:0044237//cellular metabolic process;GO:0044248//cellular catabolic process;GO:0055114//oxidation-reduction process;GO:0009987//cellular process;GO:0009062//fatty acid catabolic process;GO:0043436//oxoacid metabolic process;GO:0006629//lipid metabolic process;GO:0046395//carboxylic acid catabolic process;GO:00…
LOC110682192	XM_021858459.1	21.75	5.61	17.71	8.366	1.02414	0.257649	0.0410834	-0.396894	0.854231	0.410022	1.52297	0.0070698	0.00133804	AP2-EREBP	K09286//EREBP-like factor	XP_021714151.1|2.4e-161|ethylene-responsive transcription factor ERF060-like [Chenopodium quinoa]	GO:0043231//intracellular membrane-bounded organelle;GO:0043226//organelle;GO:0005622//intracellular;GO:0005634//nucleus;GO:0110165//cellular anatomical entity;GO:0043229//intracellular organelle;GO:0043227//membrane-bounded organelle;GO:1901363//heterocyclic compound binding;GO:0140110//transcription regulator activity;GO:0003677//DNA binding;GO:0097159//organic cyclic compound binding;GO:000370…
LOC110682194	XM_021858460.1	36.403	15.073	19.086	10.463	0.902	0.134379	0.013952	0.614021	0.31362	0.0503089	1.97447	2.59548e-08	1.42802e-09	NA	K01087//trehalose 6-phosphate phosphatase [EC:3.1.3.12]+ko01100//Metabolic pathways+ko00500//Starch and sucrose metabolism	XP_021714152.1|1.6e-203|probable trehalose-phosphate phosphatase I [Chenopodium quinoa]	GO:0005975//carbohydrate metabolic process;GO:0044262//cellular carbohydrate metabolic process;GO:0009987//cellular process;GO:0044238//primary metabolic process;GO:0046351//disaccharide biosynthetic process;GO:0005991//trehalose metabolic process;GO:0016051//carbohydrate biosynthetic process;GO:0044249//cellular biosynthetic process;GO:0009058//biosynthetic process;GO:1901576//organic substance …
LOC110682217	BGI_novel_T006032,XM_021858486.1,XM_021858487.1,BGI_novel_T006031	3.773	2.503	2.823	1.95	0.603219	0.176975	0.0218543	0.484531	0.235262	0.0321952	1.1877	6.22847e-07	4.28595e-08	TIG	K21596//calmodulin-binding transcription activator;K21596//calmodulin-binding transcription activator;K21596//calmodulin-binding transcription activator;K21596//calmodulin-binding transcription activator	XP_021714178.1|0.0e+00|calmodulin-binding transcription activator 3-like isoform X1 [Chenopodium quinoa]	NA
LOC110682301	XM_021858613.1	8.856	5.233	4.42	2.12	1.01029	0.156457	0.0178131	1.27469	0.0541159	0.00398439	2.14442	3.63643e-05	3.57405e-06	NA	K09843//(+)-abscisic acid 8'-hydroxylase [EC:1.14.14.137]+ko00906//Carotenoid biosynthesis	XP_021714305.1|8.7e-282|abscisic acid 8'-hydroxylase 4-like [Chenopodium quinoa]	GO:0046914//transition metal ion binding;GO:0005488//binding;GO:0020037//heme binding;GO:0016705//oxidoreductase activity, acting on paired donors, with incorporation or reduction of molecular oxygen;GO:0043169//cation binding;GO:0016491//oxidoreductase activity;GO:1901363//heterocyclic compound binding;GO:0005506//iron ion binding;GO:0043167//ion binding;GO:0003824//catalytic activity;GO:0004497…
LOC110682320	XM_021858634.1,XM_021858635.1,XM_021858636.1,XM_021858633.1	17.166	11.47	11.406	7.65	0.652318	0.00454375	0.000139006	0.688023	0.000632576	1.77098e-05	1.3769	2.07514e-15	5.04486e-17	NA	K00763//nicotinate phosphoribosyltransferase [EC:6.3.4.21]+ko01100//Metabolic pathways+ko00760//Nicotinate and nicotinamide metabolism;K00763//nicotinate phosphoribosyltransferase [EC:6.3.4.21]+ko01100//Metabolic pathways+ko00760//Nicotinate and nicotinamide metabolism;K00763//nicotinate phosphoribosyltransferase [EC:6.3.4.21]+ko01100//Metabolic pathways+ko00760//Nicotinate and nicotinamide metab…	XP_021835573.1|2.8e-304|nicotinate phosphoribosyltransferase 2-like [Spinacia oleracea]	GO:0009058//biosynthetic process;GO:0072525//pyridine-containing compound biosynthetic process;GO:0046483//heterocycle metabolic process;GO:0072524//pyridine-containing compound metabolic process;GO:0044281//small molecule metabolic process;GO:0006793//phosphorus metabolic process;GO:0043094//cellular metabolic compound salvage;GO:0034355//NAD salvage;GO:0019438//aromatic compound biosynthetic pr…
LOC110682330	BGI_novel_T006068,XM_021858651.1	54.283	21.99	23.056	21.446	0.199082	0.894805	0.560895	0.151059	0.919583	0.597172	1.55169	3.47814e-12	1.16539e-13	NA	K14595//abscisate beta-glucosyltransferase [EC:2.4.1.263]+ko00906//Carotenoid biosynthesis+ko01100//Metabolic pathways+ko01110//Biosynthesis of secondary metabolites;K14595//abscisate beta-glucosyltransferase [EC:2.4.1.263]+ko00906//Carotenoid biosynthesis+ko01100//Metabolic pathways+ko01110//Biosynthesis of secondary metabolites	XP_021714343.1|1.5e-128|CBS domain-containing protein CBSX1, chloroplastic-like [Chenopodium quinoa]	GO:0019725//cellular homeostasis;GO:0045454//cell redox homeostasis;GO:0009987//cellular process;GO:0050794//regulation of cellular process;GO:0065008//regulation of biological quality;GO:0042592//homeostatic process;GO:0065007//biological regulation;GO:0050789//regulation of biological process;GO:0009507//chloroplast;GO:0043227//membrane-bounded organelle;GO:0005622//intracellular;GO:0110165//ce…
LOC110682331	XM_021858653.1	7.236	5.31	4.126	3.68	0.242541	0.763772	0.35712	0.615857	0.406291	0.0781448	1.18316	2.1439e-07	1.37159e-08	AP2-EREBP	K09286//EREBP-like factor	XP_021714345.1|1.5e-97|ethylene-responsive transcription factor ERF010-like [Chenopodium quinoa]	GO:0043229//intracellular organelle;GO:0005622//intracellular;GO:0043231//intracellular membrane-bounded organelle;GO:0043226//organelle;GO:0005634//nucleus;GO:0110165//cellular anatomical entity;GO:0043227//membrane-bounded organelle;GO:0003677//DNA binding;GO:0003700//DNA-binding transcription factor activity;GO:0140110//transcription regulator activity;GO:0097159//organic cyclic compound bindi…
LOC110682334	XM_021858663.1	13.96	8.84	9.176	6.983	0.462294	0.342475	0.0674833	0.442199	0.449005	0.0924532	1.20815	5.83326e-06	4.81983e-07	NA	K14011//UBX domain-containing protein 6+ko04141//Protein processing in endoplasmic reticulum	XP_021714355.1|7.0e-283|plant UBX domain-containing protein 2-like [Chenopodium quinoa]	NA
LOC110682343	XM_021858672.1	34.276	25.04	18.373	14.61	0.395731	0.607499	0.206426	0.873074	0.0013748	4.40307e-05	1.41581	1.73187e-05	1.58272e-06	WRKY	K13425//WRKY transcription factor 22+ko04016//MAPK signaling pathway - plant+ko04626//Plant-pathogen interaction	XP_021714364.1|9.5e-201|probable WRKY transcription factor 15 [Chenopodium quinoa]	NA
LOC110682351	XM_021858681.1	5.11	2.026	2.683	1.793	0.588544	0.531292	0.155884	0.276309	0.910432	0.524381	1.67955	8.91918e-05	9.58825e-06	NA	K07937//ADP-ribosylation factor 1+ko04144//Endocytosis	XP_021714373.1|4.3e-97|ADP-ribosylation factor 1-like [Chenopodium quinoa]	NA
LOC110682357	XM_021858689.1	18.53	7.31	9.586	5.866	0.777405	0.0678796	0.00499239	0.418974	0.687922	0.228097	1.87199	9.05467e-25	1.04664e-26	NA	K00306//sarcosine oxidase / L-pipecolate oxidase [EC:1.5.3.1 1.5.3.7]+ko00310//Lysine degradation+ko04146//Peroxisome+ko01100//Metabolic pathways+ko00260//Glycine, serine and threonine metabolism	XP_021714381.1|1.4e-246|putative oxidoreductase TDA3 [Chenopodium quinoa]	GO:0003824//catalytic activity;GO:0016491//oxidoreductase activity;
LOC110682359	XM_021858691.1	91.09	63.676	49.593	40.296	0.381838	0.284764	0.0486225	0.758694	0.0197407	0.00107809	1.39098	3.1966e-10	1.34835e-11	MYB	K09422//transcription factor MYB, plant	XP_021714383.1|8.5e-185|transcription factor MYB44-like [Chenopodium quinoa]	GO:0005622//intracellular;GO:0005634//nucleus;GO:0043226//organelle;GO:0043231//intracellular membrane-bounded organelle;GO:0043227//membrane-bounded organelle;GO:0110165//cellular anatomical entity;GO:0043229//intracellular organelle;GO:0005488//binding;GO:1901363//heterocyclic compound binding;GO:0097159//organic cyclic compound binding;GO:0003677//DNA binding;GO:0003676//nucleic acid binding;
LOC110682376	XM_021858708.1	12.353	5.67	6.206	2.566	1.21757	0.103321	0.00928372	1.12949	0.141111	0.0148842	2.37381	2.5616e-06	1.96546e-07	NA	K08332//vacuolar protein 8	XP_021714400.1|1.9e-207|U-box domain-containing protein 4-like [Chenopodium quinoa]	NA
LOC110682378	XM_021858710.1	0.503	0.1	0.033	0	0.111604	0.898091	0.681693	0.736327	0.682481	0.222993	2.86352	0.0166006	0.00363182	NA	K03860//phosphatidylinositol glycan, class Q+ko01100//Metabolic pathways+ko00563//Glycosylphosphatidylinositol (GPI)-anchor biosynthesis;K20887//xyloglucan glycosyltransferase 4 [EC:2.4.1.-]	XP_021714402.1|2.6e-52|peamaclein-like [Chenopodium quinoa]	NA
LOC110682384	XM_021858716.1	12.43	7.996	8.69	6.583	0.485333	0.0636944	0.00454712	0.391749	0.0949591	0.00848722	1.13999	1.67098e-11	6.01191e-13	NA	K09553//stress-induced-phosphoprotein 1;K09667//protein O-GlcNAc transferase [EC:2.4.1.255]+ko00514//Other types of O-glycan biosynthesis;K03350//anaphase-promoting complex subunit 3+ko04120//Ubiquitin mediated proteolysis	XP_021714408.1|0.0e+00|suppressor of RPS4-RLD 1-like [Chenopodium quinoa]	NA
LOC110682386	XM_021858718.1	27.003	13.163	18.15	14.223	0.424884	0.473288	0.124804	0.00601882	0.998482	0.980373	1.13109	0.000767615	0.000105576	NA	NA	XP_021735086.1|1.6e-150|probable esterase KAI2 [Chenopodium quinoa]	GO:0050896//response to stimulus;GO:0080167//response to karrikin;GO:0009628//response to abiotic stimulus;
LOC110682412	XM_021858744.1	4.903	2.66	2.95	2.716	0.19962	0.782928	0.377188	0.0789876	0.946226	0.767797	1.06866	7.4489e-05	7.85906e-06	NA	NA	XP_021714436.1|5.0e-217|uncharacterized protein LOC110682412 [Chenopodium quinoa]	GO:0070013//intracellular organelle lumen;GO:0031974//membrane-enclosed lumen;GO:0032991//protein-containing complex;GO:0031248//protein acetyltransferase complex;GO:0005622//intracellular;GO:0005654//nucleoplasm;GO:0110165//cellular anatomical entity;GO:0043226//organelle;GO:1990234//transferase complex;GO:0031981//nuclear lumen;GO:0043231//intracellular membrane-bounded organelle;GO:0043227//me…
LOC110682424	XM_021858758.1,XM_021858757.1	18.07	8.743	10.386	5.926	0.815327	0.414899	0.0965988	0.600731	0.708039	0.244694	1.75932	0.000303141	3.74044e-05	TAZ	K02987//small subunit ribosomal protein S4e+ko03010//Ribosome;K10523//speckle-type POZ protein;K04498//E1A/CREB-binding protein [EC:2.3.1.48];K02987//small subunit ribosomal protein S4e+ko03010//Ribosome;K10523//speckle-type POZ protein;K04498//E1A/CREB-binding protein [EC:2.3.1.48]	XP_021751426.1|2.4e-212|BTB/POZ and TAZ domain-containing protein 4-like [Chenopodium quinoa]	GO:0050789//regulation of biological process;GO:0010556//regulation of macromolecule biosynthetic process;GO:0019219//regulation of nucleobase-containing compound metabolic process;GO:0010468//regulation of gene expression;GO:0031326//regulation of cellular biosynthetic process;GO:0051171//regulation of nitrogen compound metabolic process;GO:0050794//regulation of cellular process;GO:0006355//reg…
LOC110682458	XM_021858797.1	8.223	6.876	7.633	4.66	0.778191	0.0155455	0.000674006	0.658689	0.0830207	0.00708388	1.03519	3.97252e-05	3.94401e-06	NA	NA	XP_021714489.1|1.5e-249|protein PHLOEM PROTEIN 2-LIKE A10-like [Chenopodium quinoa]	GO:0016021//integral component of membrane;GO:0031224//intrinsic component of membrane;GO:0110165//cellular anatomical entity;GO:0016020//membrane;
LOC110682461	XM_021858800.1	133.916	52.16	96.48	50.02	0.909955	0.22431	0.0322127	0.17922	0.919583	0.620506	1.58861	1.45705e-05	1.31387e-06	NA	NA	XP_021714492.1|2.2e-35|phytosulfokines 3-like [Chenopodium quinoa]	GO:0009987//cellular process;GO:0008283//cell population proliferation;GO:0110165//cellular anatomical entity;GO:0005576//extracellular region;GO:0048018//receptor ligand activity;GO:0005102//signaling receptor binding;GO:0030545//receptor regulator activity;GO:0005488//binding;GO:0008083//growth factor activity;GO:0005515//protein binding;GO:0030546//signaling receptor activator activity;GO:0098…
LOC110682497	XM_021858836.1,XM_021858835.1	1.043	0.413	0.41	0.416	0.0410811	0.987437	0.926801	0.0729646	0.971048	0.865078	1.43601	0.0234839	0.00547079	NA	NA	XP_021714528.1|3.8e-79|uncharacterized protein LOC110682497 isoform X2 [Chenopodium quinoa]	NA
LOC110682523	BGI_novel_T006115,XM_021858865.1	2.993	0.866	1.036	0.886	0.0906886	0.954173	0.840546	0.0496156	0.988354	0.919417	1.21615	0.0182279	0.00405111	NA	K07252//dolichyldiphosphatase [EC:3.6.1.43]+ko00510//N-Glycan biosynthesis;K19355//mannan endo-1,4-beta-mannosidase [EC:3.2.1.78]+ko00051//Fructose and mannose metabolism;K07252//dolichyldiphosphatase [EC:3.6.1.43]+ko00510//N-Glycan biosynthesis	XP_021714557.1|3.3e-115|lipid phosphate phosphatase epsilon 2, chloroplastic-like [Chenopodium quinoa]	GO:0044238//primary metabolic process;GO:0008152//metabolic process;GO:0005975//carbohydrate metabolic process;GO:0071704//organic substance metabolic process;GO:0003824//catalytic activity;GO:0016798//hydrolase activity, acting on glycosyl bonds;GO:0016787//hydrolase activity;GO:0004553//hydrolase activity, hydrolyzing O-glycosyl compounds;
LOC110682530	XM_021858873.1	26.163	8.88	14.553	7.813	0.867211	0.343231	0.0677603	0.269921	0.919583	0.558905	1.86827	0.000417324	5.34156e-05	NA	K08900//mitochondrial chaperone BCS1	XP_021714565.1|3.8e-276|AAA-ATPase At3g50940-like [Chenopodium quinoa]	NA
LOC110682604	XM_021858959.1	25.616	11.713	12.493	10.84	0.232574	0.897239	0.576601	0.215284	0.919583	0.574223	1.42659	0.000161481	1.85186e-05	NA	NA	XP_021714651.1|2.0e-76|uncharacterized protein LOC110682604 [Chenopodium quinoa]	NA
LOC110682606	XM_021858960.1	0.803	0.093	0.083	0.03	0.372384	0.885696	0.544214	0.447429	0.890146	0.481414	3.82161	1.96725e-05	1.82386e-06	NA	K08900//mitochondrial chaperone BCS1	XP_021714652.1|1.1e-275|AAA-ATPase At2g18193-like [Chenopodium quinoa]	NA
LOC110682633	XM_021858968.1	0.253	0.003	0.223	0	1.59472	0.174394	0.0213268	NA	NA	NA	2.99066	0.0123727	0.00257324	NA	K17604//zinc finger SWIM domain-containing protein 3	XP_021714660.1|0.0e+00|uncharacterized protein LOC110682633 [Chenopodium quinoa]	NA
LOC110682638	XM_021858974.1,BGI_novel_T006132	1.59	0.666	0.496	0.28	0.736884	0.487792	0.13134	1.22153	0.0820259	0.0069755	2.58343	3.06959e-09	1.4612e-10	NA	K11593//eukaryotic translation initiation factor 2C;K11593//eukaryotic translation initiation factor 2C	TXG48275.1|5.7e-131|hypothetical protein EZV62_027569 [Acer yangbiense]	GO:0060255//regulation of macromolecule metabolic process;GO:0010629//negative regulation of gene expression;GO:0010605//negative regulation of macromolecule metabolic process;GO:0050789//regulation of biological process;GO:0031047//gene silencing by RNA;GO:0010468//regulation of gene expression;GO:0009987//cellular process;GO:0016458//gene silencing;GO:0009892//negative regulation of metabolic p…
LOC110682654	XM_021858986.1	95.243	63.75	66.46	49.453	0.508295	0.0403035	0.00236593	0.475412	0.0625883	0.00483031	1.16678	5.00716e-11	1.90574e-12	EIL	K14514//ethylene-insensitive protein 3+ko04016//MAPK signaling pathway - plant+ko04075//Plant hormone signal transduction	XP_021714678.1|0.0e+00|ETHYLENE INSENSITIVE 3-like 1 protein [Chenopodium quinoa]	GO:0043231//intracellular membrane-bounded organelle;GO:0043226//organelle;GO:0005622//intracellular;GO:0043229//intracellular organelle;GO:0005634//nucleus;GO:0043227//membrane-bounded organelle;GO:0110165//cellular anatomical entity;GO:0140110//transcription regulator activity;GO:0003700//DNA-binding transcription factor activity;
LOC110682655	XM_021858988.1,XM_021858989.1,BGI_novel_T006130,XM_021858987.1	16.443	8.48	6.156	5.496	0.263189	0.843441	0.476387	0.736129	0.0209514	0.00116064	1.78457	1.35721e-17	2.73144e-19	NA	K20279//synaptojanin [EC:3.1.3.36]+ko01100//Metabolic pathways+ko04070//Phosphatidylinositol signaling system+ko00562//Inositol phosphate metabolism;K20279//synaptojanin [EC:3.1.3.36]+ko01100//Metabolic pathways+ko04070//Phosphatidylinositol signaling system+ko00562//Inositol phosphate metabolism;K20279//synaptojanin [EC:3.1.3.36]+ko01100//Metabolic pathways+ko04070//Phosphatidylinositol signalin…	XP_021714679.1|4.7e-299|type I inositol polyphosphate 5-phosphatase 10 isoform X1 [Chenopodium quinoa]	GO:0006629//lipid metabolic process;GO:0071704//organic substance metabolic process;GO:0046839//phospholipid dephosphorylation;GO:0046856//phosphatidylinositol dephosphorylation;GO:0006793//phosphorus metabolic process;GO:0006650//glycerophospholipid metabolic process;GO:0044237//cellular metabolic process;GO:0044238//primary metabolic process;GO:0019637//organophosphate metabolic process;GO:0046…
LOC110682737	XM_021859063.1	25.28	17.036	20.29	12.673	0.70594	0.333324	0.0642016	0.501508	0.660246	0.205787	1.19011	0.00797179	0.0015416	NA	K01674//carbonic anhydrase [EC:4.2.1.1]+ko00910//Nitrogen metabolism	XP_021714755.1|1.1e-159|alpha carbonic anhydrase 7-like [Chenopodium quinoa]	GO:0046872//metal ion binding;GO:0043169//cation binding;GO:0016829//lyase activity;GO:0016836//hydro-lyase activity;GO:0008270//zinc ion binding;GO:0005488//binding;GO:0003824//catalytic activity;GO:0004089//carbonate dehydratase activity;GO:0016835//carbon-oxygen lyase activity;GO:0046914//transition metal ion binding;GO:0043167//ion binding;
LOC110682775	XM_021859112.1	1.483	0.623	1.093	0.766	0.533989	0.600748	0.201806	-0.166919	0.931786	0.724747	1.12096	0.0280571	0.00675339	NA	NA	XP_021714804.1|4.0e-67|uncharacterized protein LOC110682775 [Chenopodium quinoa]	NA
LOC110682884	XM_021859224.1	43.356	28.906	39.213	24.48	0.62062	0.601217	0.20214	0.329045	0.80727	0.343539	1.01491	0.0222458	0.00513654	NA	K03283//heat shock 70kDa protein 1/2/6/8+ko03040//Spliceosome+ko04144//Endocytosis+ko04141//Protein processing in endoplasmic reticulum	XP_016572150.1|0.0e+00|PREDICTED: heat shock cognate 70 kDa protein 2-like [Capsicum annuum]	GO:0034620//cellular response to unfolded protein;GO:0006950//response to stress;GO:0006458//'de novo' protein folding;GO:0042026//protein refolding;GO:0070887//cellular response to chemical stimulus;GO:0009987//cellular process;GO:0061077//chaperone-mediated protein folding;GO:0071310//cellular response to organic substance;GO:0051716//cellular response to stimulus;GO:0051084//'de novo' posttran…
LOC110682886	XM_021859227.1	209.746	130.876	162.166	121.086	0.466441	0.385082	0.0840338	0.217032	0.764784	0.296136	1.00126	0.000159369	1.82591e-05	NA	K03283//heat shock 70kDa protein 1/2/6/8+ko03040//Spliceosome+ko04144//Endocytosis+ko04141//Protein processing in endoplasmic reticulum	KMT17484.1|0.0e+00|hypothetical protein BVRB_2g037660 isoform B [Beta vulgaris subsp. vulgaris]	GO:0006950//response to stress;GO:0006986//response to unfolded protein;GO:0034620//cellular response to unfolded protein;GO:0035967//cellular response to topologically incorrect protein;GO:0051716//cellular response to stimulus;GO:0070887//cellular response to chemical stimulus;GO:0033554//cellular response to stress;GO:0051084//'de novo' posttranslational protein folding;GO:0042221//response to…
LOC110682888	XM_021859228.1	3.9	0.556	0.613	0.55	0.166163	0.945927	0.814162	0.0904544	0.981732	0.897903	2.60188	0.00146325	0.000220229	AP2-EREBP	K09286//EREBP-like factor	XP_021714920.1|1.1e-155|ethylene-responsive transcription factor RAP2-11 [Chenopodium quinoa]	GO:0043226//organelle;GO:0043231//intracellular membrane-bounded organelle;GO:0110165//cellular anatomical entity;GO:0005634//nucleus;GO:0043229//intracellular organelle;GO:0043227//membrane-bounded organelle;GO:0005622//intracellular;GO:0003676//nucleic acid binding;GO:1901363//heterocyclic compound binding;GO:0003677//DNA binding;GO:0097159//organic cyclic compound binding;GO:0003700//DNA-bindi…
LOC110682968	BGI_novel_T006186,XM_021859308.1	17.183	11.36	12.103	7.94	0.677445	0.00287646	7.94436e-05	0.622232	0.0070174	0.000307615	1.32987	2.7525e-14	7.43774e-16	NA	K02941//large subunit ribosomal protein LP0+ko03010//Ribosome;K22733//magnesium transporter;K02941//large subunit ribosomal protein LP0+ko03010//Ribosome;K22733//magnesium transporter	XP_021715000.1|0.0e+00|uncharacterized protein At1g04910-like [Chenopodium quinoa]	GO:0019318//hexose metabolic process;GO:0071704//organic substance metabolic process;GO:0006004//fucose metabolic process;GO:0005996//monosaccharide metabolic process;GO:0044281//small molecule metabolic process;GO:0005975//carbohydrate metabolic process;GO:0044238//primary metabolic process;GO:0008152//metabolic process;GO:0043227//membrane-bounded organelle;GO:0012505//endomembrane system;GO:00…
LOC110682969	XM_021859309.1	7.886	1.783	3.113	0.91	1.50107	0.0813574	0.00655426	0.871873	0.551539	0.139839	3.06731	2.30112e-07	1.48015e-08	NA	NA	XP_021715001.1|1.2e-85|putative uncharacterized protein DDB_G0283051 [Chenopodium quinoa]	NA
LOC110683006	XM_021859342.1	88.916	51.736	47.526	35.85	0.479157	0.32855	0.0625158	0.630028	0.137586	0.0143209	1.52181	1.32858e-09	6.025e-11	NA	K12191//charged multivesicular body protein 2A+ko04144//Endocytosis	XP_021715034.1|2.0e-118|vacuolar protein sorting-associated protein 2 homolog 1-like [Chenopodium quinoa]	NA
LOC110683034	XM_021859371.1,XM_021859372.1	15.196	9.11	12.526	7.633	0.812574	3.03765e-07	2.06594e-09	0.381365	0.32683	0.0540337	1.24546	6.97286e-14	1.97492e-15	NA	K14497//protein phosphatase 2C [EC:3.1.3.16]+ko04016//MAPK signaling pathway - plant+ko04075//Plant hormone signal transduction;K14497//protein phosphatase 2C [EC:3.1.3.16]+ko04016//MAPK signaling pathway - plant+ko04075//Plant hormone signal transduction	XP_021715063.1|0.0e+00|probable protein phosphatase 2C 50 [Chenopodium quinoa]	GO:0043169//cation binding;GO:0046872//metal ion binding;GO:0004722//protein serine/threonine phosphatase activity;GO:0004721//phosphoprotein phosphatase activity;GO:0140096//catalytic activity, acting on a protein;GO:0016787//hydrolase activity;GO:0043167//ion binding;GO:0016788//hydrolase activity, acting on ester bonds;GO:0042578//phosphoric ester hydrolase activity;GO:0003824//catalytic activ…
LOC110683043	XM_021859380.1	3.323	1.516	1.16	0.833	0.511999	0.63556	0.228926	0.911205	0.165488	0.018911	2.15678	1.95666e-08	1.05405e-09	NA	K13459//disease resistance protein RPS2+ko04626//Plant-pathogen interaction	XP_021715072.1|0.0e+00|disease resistance protein RPS2-like [Chenopodium quinoa]	NA
LOC110683047	XM_021859385.1	48.406	18.186	9.74	9.85	0.0778269	0.946119	0.81678	0.939579	0.147238	0.0158327	2.48276	3.25875e-18	6.16965e-20	NA	K04733//interleukin-1 receptor-associated kinase 4 [EC:2.7.11.1];K01214//isoamylase [EC:3.2.1.68]+ko01100//Metabolic pathways+ko00500//Starch and sucrose metabolism+ko01110//Biosynthesis of secondary metabolites;K06892//feruloyl-CoA ortho-hydroxylase [EC:1.14.11.-]+ko01110//Biosynthesis of secondary metabolites+ko00940//Phenylpropanoid biosynthesis	XP_021715077.1|1.4e-310|IQ domain-containing protein IQM1-like [Chenopodium quinoa]	NA
LOC110683068	XM_021859415.1	14.8	10.363	9.97	7.403	0.501593	0.171658	0.020801	0.58425	0.124246	0.0125038	1.21211	2.42259e-07	1.56354e-08	NAC	K00521//ferric-chelate reductase [EC:1.16.1.7];K13126//polyadenylate-binding protein+ko03015//mRNA surveillance pathway+ko03018//RNA degradation+ko03013//RNA transport;K16296//serine carboxypeptidase-like clade I [EC:3.4.16.-];K03094//S-phase kinase-associated protein 1+ko04141//Protein processing in endoplasmic reticulum+ko04120//Ubiquitin mediated proteolysis	XP_021715107.1|2.8e-309|NAC domain-containing protein 17-like [Chenopodium quinoa]	GO:0080090//regulation of primary metabolic process;GO:0010556//regulation of macromolecule biosynthetic process;GO:0031326//regulation of cellular biosynthetic process;GO:0031323//regulation of cellular metabolic process;GO:2000112//regulation of cellular macromolecule biosynthetic process;GO:0065007//biological regulation;GO:0050789//regulation of biological process;GO:0010468//regulation of ge…
LOC110683184	XM_021859532.1	15.3	8.72	8.5	5.943	0.554995	0.47195	0.123926	0.628393	0.405311	0.0778232	1.55137	8.06647e-05	8.58922e-06	NA	K17098//annexin D	XP_021715224.1|4.9e-189|annexin-like protein RJ4 [Chenopodium quinoa]	GO:0046872//metal ion binding;GO:0043168//anion binding;GO:0043169//cation binding;GO:0043167//ion binding;GO:0008289//lipid binding;GO:0005543//phospholipid binding;GO:0005488//binding;GO:0005509//calcium ion binding;GO:0005544//calcium-dependent phospholipid binding;
LOC110683207	XM_021859553.1	0.67	0.316	0.466	0.293	0.672828	0.505293	0.140038	0.207145	0.919583	0.607779	1.36845	0.00293487	0.000486073	NA	K15078//structure-specific endonuclease subunit SLX1 [EC:3.6.1.-];K19613//leucine-rich repeat protein SHOC2	XP_021715245.1|0.0e+00|putative disease resistance protein RGA4 [Chenopodium quinoa]	GO:0031224//intrinsic component of membrane;GO:0110165//cellular anatomical entity;GO:0016021//integral component of membrane;GO:0016020//membrane;GO:0097367//carbohydrate derivative binding;GO:0005488//binding;GO:0036094//small molecule binding;GO:0043168//anion binding;GO:0032555//purine ribonucleotide binding;GO:0043167//ion binding;GO:1901363//heterocyclic compound binding;GO:0032559//adenyl …
LOC110683277	XM_021859624.1	0.386	0	0.053	0	0.31211	0.836744	0.465593	NA	NA	NA	3.75887	0.000492045	6.41214e-05	LFY	NA	XP_021715316.1|2.5e-297|floricaula/leafy homolog [Chenopodium quinoa]	GO:0019222//regulation of metabolic process;GO:0010468//regulation of gene expression;GO:0019219//regulation of nucleobase-containing compound metabolic process;GO:0051171//regulation of nitrogen compound metabolic process;GO:0050794//regulation of cellular process;GO:1903506//regulation of nucleic acid-templated transcription;GO:0051252//regulation of RNA metabolic process;GO:0080090//regulation…
LOC110683317	BGI_novel_T006336,XM_021859663.1	5.673	1.363	2.766	1.386	1.08031	0.0504752	0.00325682	0.0783185	0.963303	0.839334	2.20594	2.81473e-08	1.55536e-09	NA	K17545//serine/threonine-protein kinase ULK4 [EC:2.7.11.1];K11593//eukaryotic translation initiation factor 2C;K03283//heat shock 70kDa protein 1/2/6/8+ko03040//Spliceosome+ko04144//Endocytosis+ko04141//Protein processing in endoplasmic reticulum;K17545//serine/threonine-protein kinase ULK4 [EC:2.7.11.1]	XP_021715355.1|2.8e-187|uncharacterized protein LOC110683317 [Chenopodium quinoa]	NA
LOC110683320	XM_021859666.1	2.236	1.196	1.17	0.846	0.49522	0.78997	0.398041	0.568016	0.808786	0.349176	1.59597	0.033518	0.00834697	NA	NA	XP_021715358.1|1.3e-104|uncharacterized protein LOC110683320 [Chenopodium quinoa]	NA
LOC110683327	XM_021859673.1	2.73	0.913	1.123	1.416	-0.224264	0.898091	0.624951	-0.443553	0.819145	0.360662	1.12794	0.0270178	0.00645401	NA	K20283//golgin subfamily A member 4	XP_021715365.1|7.5e-261|synaptonemal complex protein 1-like [Chenopodium quinoa]	NA
LOC110683344	BGI_novel_T006284,BGI_novel_T006286,BGI_novel_T006281,BGI_novel_T006283,BGI_novel_T006280,XM_021859693.1,XM_021859696.1,BGI_novel_T006279,XM_021859694.1,BGI_novel_T006282,XM_021859695.1,BGI_novel_T006285,BGI_novel_T006277,BGI_novel_T006278	9.463	4.246	4.893	2.95	0.665258	0.229837	0.0336061	0.627707	0.16595	0.0190024	1.93923	5.26585e-15	1.32928e-16	NA	K04733//interleukin-1 receptor-associated kinase 4 [EC:2.7.11.1];K04733//interleukin-1 receptor-associated kinase 4 [EC:2.7.11.1];K04733//interleukin-1 receptor-associated kinase 4 [EC:2.7.11.1];K04733//interleukin-1 receptor-associated kinase 4 [EC:2.7.11.1];K04733//interleukin-1 receptor-associated kinase 4 [EC:2.7.11.1];K04733//interleukin-1 receptor-associated kinase 4 [EC:2.7.11.1];K04733//i…	XP_021715386.1|0.0e+00|L-type lectin-domain containing receptor kinase IV.2-like isoform X2 [Chenopodium quinoa]	GO:0016020//membrane;GO:0110165//cellular anatomical entity;GO:0016021//integral component of membrane;GO:0031224//intrinsic component of membrane;GO:0016773//phosphotransferase activity, alcohol group as acceptor;GO:0000166//nucleotide binding;GO:0003824//catalytic activity;GO:0032555//purine ribonucleotide binding;GO:0016772//transferase activity, transferring phosphorus-containing groups;GO:00…
LOC110683345	XM_021859697.1	0.696	0.283	0.22	0.346	-0.480213	0.771255	0.364805	-0.180344	0.919583	0.680731	1.20847	0.0184133	0.00409868	NA	K04733//interleukin-1 receptor-associated kinase 4 [EC:2.7.11.1]	XP_021715389.1|0.0e+00|L-type lectin-domain containing receptor kinase IV.1-like [Chenopodium quinoa]	GO:0016021//integral component of membrane;GO:0031224//intrinsic component of membrane;GO:0110165//cellular anatomical entity;GO:0016020//membrane;GO:0032559//adenyl ribonucleotide binding;GO:1901363//heterocyclic compound binding;GO:0005488//binding;GO:0043167//ion binding;GO:0016740//transferase activity;GO:0035639//purine ribonucleoside triphosphate binding;GO:0016772//transferase activity, tr…
LOC110683346	XM_021859698.1	33.8	16.563	15.873	10.18	0.707402	0.0493345	0.00314687	0.80561	0.00203538	7.0404e-05	1.94305	1.01005e-24	1.17848e-26	NA	K04733//interleukin-1 receptor-associated kinase 4 [EC:2.7.11.1]	XP_021715390.1|0.0e+00|L-type lectin-domain containing receptor kinase IV.2-like [Chenopodium quinoa]	NA
LOC110683352	XM_021859703.1	1.68	0.733	1.136	0.856	0.483022	0.584607	0.190311	-0.0908763	0.958121	0.813361	1.15068	0.0253963	0.00600608	NA	K04733//interleukin-1 receptor-associated kinase 4 [EC:2.7.11.1]	XP_021715395.1|0.0e+00|L-type lectin-domain containing receptor kinase IV.1-like [Chenopodium quinoa]	NA
LOC110683355	XM_021859705.1	1.226	0.553	0.52	0.273	0.860747	0.423096	0.100399	0.964825	0.386086	0.071705	2.24038	4.56489e-05	4.59449e-06	NA	K04733//interleukin-1 receptor-associated kinase 4 [EC:2.7.11.1]	XP_021715397.1|1.6e-303|receptor like protein kinase S.3-like [Chenopodium quinoa]	NA
LOC110683364	XM_021859717.1	0.27	0.05	0.05	0.03	0.322651	0.898091	0.648353	0.272085	0.919583	0.69039	2.57216	0.0100775	0.00202267	NA	K14497//protein phosphatase 2C [EC:3.1.3.16]+ko04016//MAPK signaling pathway - plant+ko04075//Plant hormone signal transduction	XP_021715409.1|2.0e-233|probable protein phosphatase 2C 24 [Chenopodium quinoa]	GO:0046872//metal ion binding;GO:0004721//phosphoprotein phosphatase activity;GO:0004722//protein serine/threonine phosphatase activity;GO:0043167//ion binding;GO:0016787//hydrolase activity;GO:0016788//hydrolase activity, acting on ester bonds;GO:0003824//catalytic activity;GO:0005488//binding;GO:0016791//phosphatase activity;GO:0042578//phosphoric ester hydrolase activity;GO:0140096//catalytic …
LOC110683392	XM_021859751.1,XM_021859752.1,XM_021859753.1	58.04	31.223	32.856	25.91	0.413107	0.172301	0.0209321	0.383222	0.117038	0.0114425	1.38249	1.87651e-17	3.82944e-19	NA	K12349//neutral ceramidase [EC:3.5.1.23]+ko00600//Sphingolipid metabolism+ko01100//Metabolic pathways;K12349//neutral ceramidase [EC:3.5.1.23]+ko00600//Sphingolipid metabolism+ko01100//Metabolic pathways;K12349//neutral ceramidase [EC:3.5.1.23]+ko00600//Sphingolipid metabolism+ko01100//Metabolic pathways	XP_021715443.1|0.0e+00|neutral ceramidase 2-like [Chenopodium quinoa]	GO:0006665//sphingolipid metabolic process;GO:1901564//organonitrogen compound metabolic process;GO:0008152//metabolic process;GO:0044248//cellular catabolic process;GO:0006629//lipid metabolic process;GO:0006672//ceramide metabolic process;GO:0044242//cellular lipid catabolic process;GO:0030149//sphingolipid catabolic process;GO:0044238//primary metabolic process;GO:0009987//cellular process;GO:…
LOC110683403	XM_021859764.1	118.763	116.9	128.81	63.44	1.04901	0.0628638	0.00445768	0.974846	0.00069186	1.96726e-05	1.10903	2.59383e-06	1.99526e-07	NA	K00799//glutathione S-transferase [EC:2.5.1.18]+ko00480//Glutathione metabolism	XP_021715456.1|1.5e-125|probable glutathione S-transferase [Chenopodium quinoa]	GO:0016740//transferase activity;GO:0003824//catalytic activity;
LOC110683435	XM_021859809.1	10.033	4.72	7.44	4.363	0.775511	0.291571	0.0506174	0.220683	0.919583	0.579248	1.38329	0.00149425	0.000225834	NA	K02941//large subunit ribosomal protein LP0+ko03010//Ribosome	XP_021715501.1|1.9e-176|60S acidic ribosomal protein P0-like [Chenopodium quinoa]	NA
LOC110683436	XM_021859810.1	51.573	21.226	25.073	13.806	0.875143	0.288717	0.0497951	0.707764	0.188879	0.0231128	2.06208	1.83415e-09	8.4844e-11	NA	K01657//anthranilate synthase component I [EC:4.1.3.27]+ko01230//Biosynthesis of amino acids+ko01100//Metabolic pathways+ko01110//Biosynthesis of secondary metabolites+ko00400//Phenylalanine, tyrosine and tryptophan biosynthesis	XP_021720708.1|0.0e+00|anthranilate synthase alpha subunit 2, chloroplastic-like [Chenopodium quinoa]	GO:0008152//metabolic process;GO:0046483//heterocycle metabolic process;GO:0006725//cellular aromatic compound metabolic process;GO:1901566//organonitrogen compound biosynthetic process;GO:0006576//cellular biogenic amine metabolic process;GO:0044106//cellular amine metabolic process;GO:1901576//organic substance biosynthetic process;GO:0009987//cellular process;GO:0042401//cellular biogenic amin…
LOC110683457	XM_021859835.1	1.82	1.376	1.32	0.856	0.687267	0.0816967	0.00659306	0.757707	0.123808	0.012438	1.28704	3.07644e-05	2.96817e-06	NA	K19517//1D-myo-inositol 3-kinase [EC:2.7.1.64]+ko01100//Metabolic pathways+ko00562//Inositol phosphate metabolism	XP_021715527.1|1.3e-223|inositol 3-kinase-like [Chenopodium quinoa]	GO:0033517//myo-inositol hexakisphosphate metabolic process;GO:0008152//metabolic process;GO:1901576//organic substance biosynthetic process;GO:0006796//phosphate-containing compound metabolic process;GO:0019751//polyol metabolic process;GO:0010264//myo-inositol hexakisphosphate biosynthetic process;GO:0009058//biosynthetic process;GO:0044237//cellular metabolic process;GO:0044281//small molecule…
LOC110683466	BGI_novel_T006316,XM_021859844.1,BGI_novel_T006315	3.856	3.05	2.016	1.56	0.432622	0.755862	0.348684	0.944199	0.328523	0.0544504	1.48845	0.00135547	0.000201978	NA	K05857//phosphatidylinositol phospholipase C, delta [EC:3.1.4.11]+ko01100//Metabolic pathways+ko04070//Phosphatidylinositol signaling system+ko00562//Inositol phosphate metabolism;K05857//phosphatidylinositol phospholipase C, delta [EC:3.1.4.11]+ko01100//Metabolic pathways+ko04070//Phosphatidylinositol signaling system+ko00562//Inositol phosphate metabolism;K05857//phosphatidylinositol phospholip…	XP_021715536.1|0.0e+00|phosphoinositide phospholipase C 4-like [Chenopodium quinoa]	GO:0006629//lipid metabolic process;GO:0035556//intracellular signal transduction;GO:0050896//response to stimulus;GO:1901575//organic substance catabolic process;GO:0051716//cellular response to stimulus;GO:0008152//metabolic process;GO:0009056//catabolic process;GO:0044238//primary metabolic process;GO:0071704//organic substance metabolic process;GO:0016042//lipid catabolic process;GO:0050789//…
LOC110683468	XM_021859845.1	23.8	12.146	14.44	10.32	0.477544	0.700456	0.287664	0.317707	0.87676	0.460229	1.34056	0.0105629	0.00213796	NA	K05857//phosphatidylinositol phospholipase C, delta [EC:3.1.4.11]+ko01100//Metabolic pathways+ko04070//Phosphatidylinositol signaling system+ko00562//Inositol phosphate metabolism	XP_021715537.1|0.0e+00|phosphoinositide phospholipase C 4-like [Chenopodium quinoa]	GO:0050896//response to stimulus;GO:0007154//cell communication;GO:0006629//lipid metabolic process;GO:0065007//biological regulation;GO:0051716//cellular response to stimulus;GO:0007165//signal transduction;GO:0008152//metabolic process;GO:0050789//regulation of biological process;GO:0009056//catabolic process;GO:0023052//signaling;GO:0050794//regulation of cellular process;GO:0009987//cellular …
LOC110683470	XM_021859847.1	0.963	0.316	0.493	0.35	0.501045	0.679214	0.269571	-0.0190048	0.998482	0.972079	1.57572	0.00573472	0.0010514	NA	K05857//phosphatidylinositol phospholipase C, delta [EC:3.1.4.11]+ko01100//Metabolic pathways+ko04070//Phosphatidylinositol signaling system+ko00562//Inositol phosphate metabolism	XP_021715539.1|0.0e+00|phosphoinositide phospholipase C 1-like [Chenopodium quinoa]	GO:0050794//regulation of cellular process;GO:0098662//inorganic cation transmembrane transport;GO:0034220//ion transmembrane transport;GO:0032879//regulation of localization;GO:0006874//cellular calcium ion homeostasis;GO:0006811//ion transport;GO:0098660//inorganic ion transmembrane transport;GO:0050896//response to stimulus;GO:0006629//lipid metabolic process;GO:0009987//cellular process;GO:00…
LOC110683481	XM_021859856.1	14.316	5.163	5.643	4.596	0.37106	0.244814	0.0373291	0.276092	0.448782	0.0923734	1.85265	7.51286e-32	5.93065e-34	NA	K08332//vacuolar protein 8	XP_021715548.1|0.0e+00|U-box domain-containing protein 44-like [Chenopodium quinoa]	GO:0004842//ubiquitin-protein transferase activity;GO:0019787//ubiquitin-like protein transferase activity;GO:0016740//transferase activity;GO:0003824//catalytic activity;GO:0140096//catalytic activity, acting on a protein;
LOC110683511	BGI_novel_T006333,XM_021859900.1	1.163	0.6	0.703	0.386	0.901286	0.171575	0.0207835	0.727346	0.462088	0.097644	1.81423	3.94906e-07	2.63008e-08	NA	K00679//phospholipid:diacylglycerol acyltransferase [EC:2.3.1.158]+ko01100//Metabolic pathways+ko00561//Glycerolipid metabolism;K10260//F-box and WD-40 domain protein 7+ko04120//Ubiquitin mediated proteolysis	KMT05013.1|6.2e-170|hypothetical protein BVRB_7g171720 isoform B [Beta vulgaris subsp. vulgaris]	GO:0006807//nitrogen compound metabolic process;GO:0008152//metabolic process;GO:1901360//organic cyclic compound metabolic process;GO:0000460//maturation of 5.8S rRNA;GO:0010467//gene expression;GO:0090304//nucleic acid metabolic process;GO:0000470//maturation of LSU-rRNA;GO:0006396//RNA processing;GO:0022613//ribonucleoprotein complex biogenesis;GO:0006725//cellular aromatic compound metabolic …
LOC110683543	XM_021859943.1,XM_021859942.1	51.613	29.513	35.703	21.68	0.79193	0.000142362	2.28089e-06	0.556197	0.0173824	0.000917687	1.47145	9.33963e-14	2.67767e-15	NA	K19043//E3 ubiquitin-protein ligase RHF [EC:2.3.2.27];K19043//E3 ubiquitin-protein ligase RHF [EC:2.3.2.27]	XP_021715634.1|2.0e-222|E3 ubiquitin-protein ligase RHF2A-like isoform X1 [Chenopodium quinoa]	NA
LOC110683555	XM_021859959.1	135.133	89.486	104.07	60.14	0.813647	0.100314	0.00890198	0.668004	0.100532	0.00919895	1.37359	3.19633e-06	2.50238e-07	NA	K09503//DnaJ homolog subfamily A member 2+ko04141//Protein processing in endoplasmic reticulum	XP_021715651.1|7.6e-248|dnaJ protein homolog ANJ1-like [Chenopodium quinoa]	GO:0009408//response to heat;GO:0006950//response to stress;GO:0009628//response to abiotic stimulus;GO:0006457//protein folding;GO:0009987//cellular process;GO:0009266//response to temperature stimulus;GO:0050896//response to stimulus;GO:0035639//purine ribonucleoside triphosphate binding;GO:0043167//ion binding;GO:0036094//small molecule binding;GO:0017076//purine nucleotide binding;GO:0005515/…
LOC110683564	XM_021859968.1	48.41	23.663	28.576	19.003	0.637331	0.197991	0.0260291	0.416009	0.657697	0.204071	1.54411	5.38245e-06	4.41466e-07	NA	K13161//heterogeneous nuclear ribonucleoprotein R	XP_021715660.1|0.0e+00|protein FAF-like, chloroplastic [Chenopodium quinoa]	NA
LOC110683568	XM_021859972.1,XM_021859971.1,BGI_novel_T006342	51.44	35.523	49.503	27.846	0.857552	0.0515496	0.00336659	0.44045	0.568641	0.148264	1.08032	0.00777108	0.00149503	NA	K16670//homeobox protein Meis2;K15613//homeobox protein Meis1;K16670//homeobox protein Meis2;K15613//homeobox protein Meis1;K16670//homeobox protein Meis2	XP_021715663.1|0.0e+00|BEL1-like homeodomain protein 1 [Chenopodium quinoa]	GO:2000112//regulation of cellular macromolecule biosynthetic process;GO:0080090//regulation of primary metabolic process;GO:0051171//regulation of nitrogen compound metabolic process;GO:0031323//regulation of cellular metabolic process;GO:1903506//regulation of nucleic acid-templated transcription;GO:0050794//regulation of cellular process;GO:0019219//regulation of nucleobase-containing compound…
LOC110683590	XM_021859990.1	0.55	0.21	0.286	0.193	0.485241	0.813986	0.434472	0.173892	0.946346	0.769246	1.59499	0.0119645	0.00247146	NAC	K00521//ferric-chelate reductase [EC:1.16.1.7];K13126//polyadenylate-binding protein+ko03015//mRNA surveillance pathway+ko03018//RNA degradation+ko03013//RNA transport	XP_021715682.1|1.1e-234|NAC domain-containing protein 89-like [Chenopodium quinoa]	GO:0031326//regulation of cellular biosynthetic process;GO:0050789//regulation of biological process;GO:0009889//regulation of biosynthetic process;GO:0006355//regulation of transcription, DNA-templated;GO:1903506//regulation of nucleic acid-templated transcription;GO:0051171//regulation of nitrogen compound metabolic process;GO:0010556//regulation of macromolecule biosynthetic process;GO:0031323…
LOC110683604	XM_021860005.1	1.716	0.546	0.583	0.18	1.36905	0.171338	0.0207249	1.36063	0.183609	0.022114	3.23293	8.79218e-10	3.90692e-11	NAC	K00521//ferric-chelate reductase [EC:1.16.1.7];K13126//polyadenylate-binding protein+ko03015//mRNA surveillance pathway+ko03018//RNA degradation+ko03013//RNA transport	XP_021715697.1|2.1e-152|NAC domain-containing protein 90-like [Chenopodium quinoa]	NA
LOC110683665	XM_021860061.1,XM_021860060.1,XM_021860063.1,XM_021860062.1	12.653	9.283	10.286	5.77	0.836899	0.0401933	0.00235859	0.743847	0.0684588	0.00542133	1.28143	1.35372e-05	1.21336e-06	NA	K19041//E3 ubiquitin-protein ligase RNF38/44 [EC:2.3.2.27];K10635//E3 ubiquitin-protein ligase Arkadia [EC:2.3.2.27];K19041//E3 ubiquitin-protein ligase RNF38/44 [EC:2.3.2.27];K10635//E3 ubiquitin-protein ligase Arkadia [EC:2.3.2.27];K19041//E3 ubiquitin-protein ligase RNF38/44 [EC:2.3.2.27];K10635//E3 ubiquitin-protein ligase Arkadia [EC:2.3.2.27];K19041//E3 ubiquitin-protein ligase RNF38/44 [EC…	XP_021715752.1|0.0e+00|probable E3 ubiquitin-protein ligase ZFP1 isoform X1 [Chenopodium quinoa]	NA
LOC110683698	BGI_novel_T006371,XM_021860089.1,BGI_novel_T006369,XM_021860088.1,BGI_novel_T006370,BGI_novel_T006372,XM_021860086.1,XM_021860091.1,XM_021860090.1,XM_021860087.1	23.23	10.433	16.293	8.833	0.941104	0.0124231	0.000504779	0.344475	0.758184	0.289927	1.59811	1.18645e-11	4.19917e-13	AP2-EREBP	K09284//AP2-like factor, euAP2 lineage;K09284//AP2-like factor, euAP2 lineage;K09284//AP2-like factor, euAP2 lineage;K09284//AP2-like factor, euAP2 lineage;K09284//AP2-like factor, euAP2 lineage;K09284//AP2-like factor, euAP2 lineage;K09284//AP2-like factor, euAP2 lineage;K09284//AP2-like factor, euAP2 lineage;K09284//AP2-like factor, euAP2 lineage;K09284//AP2-like factor, euAP2 lineage	XP_021715779.1|1.3e-304|floral homeotic protein APETALA 2-like isoform X2 [Chenopodium quinoa]	NA
LOC110683700	XM_021860093.1	1.496	0.213	0.966	0.643	0.556244	0.706241	0.293146	-1.20486	0.237268	0.0325581	1.38274	0.00766486	0.00147094	NA	K14638//solute carrier family 15 (peptide/histidine transporter), member 3/4	XP_021715785.1|0.0e+00|protein NRT1/ PTR FAMILY 2.4-like [Chenopodium quinoa]	NA
LOC110683711	XM_021860105.1	2.94	0.696	0.57	0.483	0.257924	0.898091	0.668506	0.513668	0.835767	0.382429	2.63615	7.46355e-06	6.31741e-07	NA	K15502//serine/threonine-protein phosphatase 6 regulatory ankyrin repeat subunit A;K15503//serine/threonine-protein phosphatase 6 regulatory ankyrin repeat subunit B	XP_021744366.1|2.1e-236|ankyrin-3-like [Chenopodium quinoa]	NA
LOC110683712	XM_021860106.1	2.226	0.72	1.796	0.7	1.04047	0.411554	0.0951156	0.1298	0.956491	0.805876	1.76014	0.00220454	0.000350204	LOB	K21994//LOB domain-containing protein 18;K13944//LOB domain-containing protein 16	XP_021715798.1|6.7e-168|LOB domain-containing protein 1-like [Chenopodium quinoa]	NA
LOC110683743	XM_021860142.1,XM_021860141.1	0.206	0.02	0.056	0.01	0.758893	0.678187	0.267695	0.116426	0.954518	0.800393	2.70399	0.0172369	0.00379721	NA	K08286//protein-serine/threonine kinase [EC:2.7.11.-];K08286//protein-serine/threonine kinase [EC:2.7.11.-]	XP_021715833.1|0.0e+00|serine/threonine-protein kinase AGC1-7-like isoform X1 [Chenopodium quinoa]	NA
LOC110683831	XM_021860245.1	2.12	0.46	1.763	0.473	1.59436	0.0680512	0.00501391	0.065869	0.988764	0.920985	2.14524	0.00213063	0.000336845	NA	NA	XP_021715937.1|1.6e-78|pathogenesis-related protein PR-4-like [Chenopodium quinoa]	GO:0009605//response to external stimulus;GO:0044419//interspecies interaction between organisms;GO:0098542//defense response to other organism;GO:0042742//defense response to bacterium;GO:0009607//response to biotic stimulus;GO:0009620//response to fungus;GO:0050832//defense response to fungus;GO:0050896//response to stimulus;GO:0006952//defense response;GO:0006950//response to stress;GO:0009617…
LOC110683857	XM_021860265.1,BGI_novel_T006379	2.096	1.263	1.446	1.076	0.492098	0.357159	0.0729967	0.329955	0.760646	0.293151	1.16826	0.000173895	2.0157e-05	NA	K03232//elongation factor 1-beta;K03232//elongation factor 1-beta	XP_021715957.1|7.3e-68|elongation factor 1-beta 2-like [Chenopodium quinoa]	GO:0005622//intracellular;GO:0032991//protein-containing complex;GO:0110165//cellular anatomical entity;GO:0005737//cytoplasm;GO:0005853//eukaryotic translation elongation factor 1 complex;GO:0097159//organic cyclic compound binding;GO:0003723//RNA binding;GO:0003746//translation elongation factor activity;GO:0090079//translation regulator activity, nucleic acid binding;GO:0005488//binding;GO:004…
LOC110683965	XM_021860361.1	0.123	0.01	0.043	0	0.646184	0.662556	0.252067	0.117662	0.919583	0.678679	2.58159	0.0364342	0.009232	NA	K01381//saccharopepsin [EC:3.4.23.25];K22683//aspartyl protease family protein [EC:3.4.23.-]	XP_021716053.1|3.6e-260|aspartyl protease UND-like [Chenopodium quinoa]	GO:0070011//peptidase activity, acting on L-amino acid peptides;GO:0140096//catalytic activity, acting on a protein;GO:0070001//aspartic-type peptidase activity;GO:0016787//hydrolase activity;GO:0004190//aspartic-type endopeptidase activity;GO:0003824//catalytic activity;GO:0004175//endopeptidase activity;GO:0008233//peptidase activity;
LOC110683969	XM_021860365.1	1.826	0.353	0.71	0.233	0.952461	0.570649	0.18102	0.396688	0.919583	0.585401	2.58881	0.0040896	0.000712183	AP2-EREBP	K09286//EREBP-like factor	XP_021716057.1|2.2e-148|dehydration-responsive element-binding protein 1F-like [Chenopodium quinoa]	NA
LOC110684007	BGI_novel_T006437,XM_021860400.1,XM_021860402.1,BGI_novel_T006438,XM_021860401.1,BGI_novel_T006439	55.093	37.746	39.31	31.966	0.386793	0.324473	0.0612945	0.351125	0.331359	0.0552834	1.01189	2.4851e-07	1.60712e-08	ARF	K14486//auxin response factor+ko04075//Plant hormone signal transduction;K14486//auxin response factor+ko04075//Plant hormone signal transduction;K14486//auxin response factor+ko04075//Plant hormone signal transduction;K14486//auxin response factor+ko04075//Plant hormone signal transduction;K14486//auxin response factor+ko04075//Plant hormone signal transduction;K14486//auxin response factor+ko04…	XP_021716094.1|0.0e+00|auxin response factor 2B-like isoform X2 [Chenopodium quinoa]	NA
LOC110684025	XM_021860417.1	0.853	0.083	0.33	0.156	0.869377	0.591926	0.195222	-0.486557	0.881528	0.469094	2.41517	0.00108512	0.000156399	NA	K09843//(+)-abscisic acid 8'-hydroxylase [EC:1.14.14.137]+ko00906//Carotenoid biosynthesis	XP_021716109.1|2.8e-290|abscisic acid 8'-hydroxylase 2-like [Chenopodium quinoa]	GO:0110165//cellular anatomical entity;GO:0016020//membrane;GO:0031224//intrinsic component of membrane;GO:0016021//integral component of membrane;GO:0005506//iron ion binding;GO:0043169//cation binding;GO:0003824//catalytic activity;GO:0046906//tetrapyrrole binding;GO:0016491//oxidoreductase activity;GO:0046872//metal ion binding;GO:0043167//ion binding;GO:1901363//heterocyclic compound binding;…
LOC110684030	XM_021860423.1,XM_021860422.1	24.193	15.473	14.226	12.293	0.290112	0.681291	0.271857	0.440263	0.534499	0.130522	1.18994	6.89501e-06	5.77787e-07	NA	K07025//putative hydrolase of the HAD superfamily;K07025//putative hydrolase of the HAD superfamily	XP_021716114.1|3.1e-168|uncharacterized protein LOC110684030 isoform X1 [Chenopodium quinoa]	GO:0003824//catalytic activity;GO:0016787//hydrolase activity;
LOC110684032	XM_021860425.1	6.336	1.98	2.733	1.423	0.921826	0.253921	0.0399133	0.541965	0.64707	0.195613	2.2915	8.58669e-07	6.01298e-08	GRAS	K14494//DELLA protein+ko04075//Plant hormone signal transduction	XP_021716117.1|0.0e+00|scarecrow-like protein 33 [Chenopodium quinoa]	NA
LOC110684034	XM_021860426.1	0.693	0.18	0.556	0.15	1.38101	0.232528	0.034228	0.257841	0.919997	0.691873	2.20984	0.000747141	0.000102339	NA	K00695//sucrose synthase [EC:2.4.1.13]+ko01100//Metabolic pathways+ko00500//Starch and sucrose metabolism	XP_010685729.1|0.0e+00|PREDICTED: sucrose synthase-like [Beta vulgaris subsp. vulgaris]	GO:0044262//cellular carbohydrate metabolic process;GO:0044238//primary metabolic process;GO:0005985//sucrose metabolic process;GO:0005975//carbohydrate metabolic process;GO:0071704//organic substance metabolic process;GO:0009311//oligosaccharide metabolic process;GO:0009987//cellular process;GO:0044237//cellular metabolic process;GO:0008152//metabolic process;GO:0005984//disaccharide metabolic p…
LOC110684039	XM_021860432.1	27.1	13.393	12.48	10.953	0.24912	0.718376	0.306961	0.395354	0.282351	0.0422847	1.51903	9.27334e-14	2.65665e-15	GRAS	K14494//DELLA protein+ko04075//Plant hormone signal transduction	XP_021716124.1|0.0e+00|scarecrow-like protein 30 [Chenopodium quinoa]	NA
LOC110684044	XM_021860438.1	5.68	5.11	4.083	3.103	0.439421	0.522738	0.15085	0.816585	0.00627275	0.00026823	1.08314	0.000324555	4.0338e-05	NA	K09510//DnaJ homolog subfamily B member 4	XP_021716130.1|3.9e-205|dnaJ homolog subfamily B member 1-like [Chenopodium quinoa]	GO:0006457//protein folding;GO:0009987//cellular process;GO:0005488//binding;GO:0005515//protein binding;GO:0051082//unfolded protein binding;
LOC110684061	XM_021860456.1	2.43	1.023	0.796	0.95	-0.163609	0.898091	0.644425	0.209145	0.919583	0.5599	1.54378	5.36469e-06	4.3966e-07	NA	K02218//casein kinase 1 [EC:2.7.11.1];K14318//nuclear pore complex protein Nup88+ko03013//RNA transport;K01247//DNA-3-methyladenine glycosylase II [EC:3.2.2.21]+ko03410//Base excision repair	XP_021716148.1|1.1e-246|protein ALP1-like [Chenopodium quinoa]	GO:0016020//membrane;GO:0016021//integral component of membrane;GO:0031224//intrinsic component of membrane;GO:0110165//cellular anatomical entity;
LOC110684063	XM_021860458.1,XM_021860459.1	14.31	8.556	8.463	6.913	0.353473	0.790726	0.400314	0.389725	0.804561	0.340901	1.22656	0.0129828	0.00272208	NA	K03979//GTPase [EC:3.6.5.-];K03979//GTPase [EC:3.6.5.-]	XP_021716150.1|0.0e+00|protein TRM32-like [Chenopodium quinoa]	NA
LOC110684065	XM_021860462.1	18.316	10.243	12.573	10.26	0.351476	0.643087	0.235295	0.110635	0.919583	0.671969	1.05004	0.000230774	2.76613e-05	NA	K01102//pyruvate dehydrogenase phosphatase [EC:3.1.3.43]	XP_021716154.1|0.0e+00|probable protein phosphatase 2C 4 [Chenopodium quinoa]	GO:0016788//hydrolase activity, acting on ester bonds;GO:0140096//catalytic activity, acting on a protein;GO:0004722//protein serine/threonine phosphatase activity;GO:0004721//phosphoprotein phosphatase activity;GO:0016791//phosphatase activity;GO:0004724//magnesium-dependent protein serine/threonine phosphatase activity;GO:0003824//catalytic activity;GO:0016787//hydrolase activity;GO:0042578//ph…
LOC110684082	XM_021860482.1	6.533	5.233	4.033	3.533	0.282084	0.701293	0.28862	0.672562	0.0151168	0.000775229	1.10567	8.48084e-08	5.07074e-09	NA	NA	XP_021716174.1|1.9e-311|uncharacterized protein LOC110684082 [Chenopodium quinoa]	NA
LOC110684083	XM_021860483.1	70.873	23.706	31.073	15.4	0.979101	0.135212	0.0140826	0.69186	0.319648	0.0519611	2.35766	6.27781e-11	2.41931e-12	NA	K03283//heat shock 70kDa protein 1/2/6/8+ko03040//Spliceosome+ko04144//Endocytosis+ko04141//Protein processing in endoplasmic reticulum	XP_021858516.1|0.0e+00|heat shock cognate 70 kDa protein [Spinacia oleracea]	GO:0035967//cellular response to topologically incorrect protein;GO:0051085//chaperone cofactor-dependent protein refolding;GO:0006986//response to unfolded protein;GO:0051084//'de novo' posttranslational protein folding;GO:0042026//protein refolding;GO:0034620//cellular response to unfolded protein;GO:0061077//chaperone-mediated protein folding;GO:0006457//protein folding;GO:0071310//cellular re…
LOC110684099	BGI_novel_T006464,BGI_novel_T006465,XM_021860504.1	12.923	5.006	4.756	3.223	0.623072	0.177562	0.021981	0.714283	0.179008	0.0213481	2.18275	2.18006e-13	6.49608e-15	NA	NA	XP_021716196.1|1.4e-206|uncharacterized protein LOC110684099 [Chenopodium quinoa]	GO:0016021//integral component of membrane;GO:0110165//cellular anatomical entity;GO:0031224//intrinsic component of membrane;GO:0016020//membrane;
LOC110684130	XM_021860539.1	30.98	18.716	15.416	14.676	0.170326	0.898091	0.636699	0.449549	0.60873	0.171488	1.27652	0.000749971	0.000102775	NA	K07213//copper chaperone	XP_021716231.1|5.3e-203|protein SODIUM POTASSIUM ROOT DEFECTIVE 1-like [Chenopodium quinoa]	GO:0006812//cation transport;GO:0030001//metal ion transport;GO:0051179//localization;GO:0006811//ion transport;GO:0051234//establishment of localization;GO:0006810//transport;GO:0043167//ion binding;GO:0043169//cation binding;GO:0005488//binding;GO:0046872//metal ion binding;
LOC110684147	XM_021860558.1	5.706	3.996	4.313	3.306	0.456706	0.118216	0.0114389	0.377604	0.194138	0.0241264	1.00124	4.6997e-09	2.30037e-10	NA	K11671//nuclear factor related to kappa-B-binding protein	XP_021716250.1|0.0e+00|uncharacterized protein LOC110684147 [Chenopodium quinoa]	GO:1902494//catalytic complex;GO:0043226//organelle;GO:0097346//INO80-type complex;GO:0005694//chromosome;GO:0000790//nuclear chromatin;GO:0110165//cellular anatomical entity;GO:0070603//SWI/SNF superfamily-type complex;GO:0033202//DNA helicase complex;GO:0043229//intracellular organelle;GO:0005622//intracellular;GO:0000785//chromatin;GO:0043231//intracellular membrane-bounded organelle;GO:190494…
LOC110684187	XM_021860601.1	16.543	12.793	12.36	8.47	0.608551	0.126063	0.0126709	0.690934	0.0147491	0.000749913	1.17106	6.74627e-07	4.65835e-08	NA	K04733//interleukin-1 receptor-associated kinase 4 [EC:2.7.11.1]	XP_021716293.1|0.0e+00|probable inactive receptor-like protein kinase At3g56050 [Chenopodium quinoa]	GO:0031224//intrinsic component of membrane;GO:0016020//membrane;GO:0110165//cellular anatomical entity;GO:0016021//integral component of membrane;GO:0030554//adenyl nucleotide binding;GO:0032555//purine ribonucleotide binding;GO:0035639//purine ribonucleoside triphosphate binding;GO:1901363//heterocyclic compound binding;GO:0005524//ATP binding;GO:0003824//catalytic activity;GO:1901265//nucleosi…
LOC110684193	XM_021860607.1	8.37	4.42	4.736	3.493	0.506618	0.238956	0.0357692	0.439534	0.522225	0.124399	1.46022	1.32417e-09	5.99899e-11	NA	K07512//mitochondrial trans-2-enoyl-CoA reductase [EC:1.3.1.38]+ko01100//Metabolic pathways+ko00062//Fatty acid elongation+ko01212//Fatty acid metabolism	XP_021716299.1|2.2e-215|enoyl-[acyl-carrier-protein] reductase, mitochondrial-like [Chenopodium quinoa]	GO:0032787//monocarboxylic acid metabolic process;GO:0008152//metabolic process;GO:0044281//small molecule metabolic process;GO:0019752//carboxylic acid metabolic process;GO:0006082//organic acid metabolic process;GO:0071704//organic substance metabolic process;GO:0044237//cellular metabolic process;GO:0043436//oxoacid metabolic process;GO:0009987//cellular process;GO:0044238//primary metabolic p…
LOC110684202	XM_021860618.1	10.826	3.233	2.37	1.78	0.43525	0.800886	0.414199	0.830999	0.519704	0.123195	2.64343	3.77915e-06	2.99965e-07	NA	K09841//xanthoxin dehydrogenase [EC:1.1.1.288]+ko00906//Carotenoid biosynthesis+ko01100//Metabolic pathways+ko01110//Biosynthesis of secondary metabolites	XP_021716310.1|1.6e-176|short-chain dehydrogenase reductase 2a-like [Chenopodium quinoa]	NA
LOC110684204	BGI_novel_T006492,XM_021860620.1	10.18	5.02	5.37	4.82	0.264715	0.666365	0.255913	0.216864	0.816146	0.357345	1.33874	1.01445e-09	4.52982e-11	NA	K11323//histone arginine demethylase JMJD6 [EC:1.14.11.-];K14792//rRNA biogenesis protein RRP5;K11323//histone arginine demethylase JMJD6 [EC:1.14.11.-]	XP_021716312.1|1.0e-206|RNA-directed DNA methylation 4-like [Chenopodium quinoa]	NA
LOC110684216	XM_021860632.1	53.253	22.156	22.896	17.293	0.478036	0.160471	0.0186341	0.463765	0.462105	0.0976869	1.83501	1.27835e-19	2.1541e-21	NA	K12761//carbon catabolite-derepressing protein kinase [EC:2.7.11.1]	XP_021716324.1|3.5e-279|CBL-interacting serine/threonine-protein kinase 11-like [Chenopodium quinoa]	GO:0007154//cell communication;GO:0050896//response to stimulus;GO:0065007//biological regulation;GO:0009987//cellular process;GO:0023052//signaling;GO:0050794//regulation of cellular process;GO:0051716//cellular response to stimulus;GO:0007165//signal transduction;GO:0050789//regulation of biological process;GO:0016773//phosphotransferase activity, alcohol group as acceptor;GO:0097367//carbohydr…
LOC110684226	XM_021860639.1,XM_021860640.1,BGI_novel_T006497	10.756	8.123	6.863	6.123	0.244464	0.795045	0.40681	0.508923	0.406234	0.0780982	1.00224	0.000887414	0.000124535	NA	K10352//myosin heavy chain;K20478//golgin subfamily B member 1;K10352//myosin heavy chain;K20478//golgin subfamily B member 1;K10352//myosin heavy chain;K20478//golgin subfamily B member 1	XP_021716331.1|1.9e-311|protein NETWORKED 4A-like isoform X1 [Chenopodium quinoa]	GO:0008092//cytoskeletal protein binding;GO:0005488//binding;GO:0003779//actin binding;GO:0005515//protein binding;
LOC110684232	XM_021860649.1	79.893	12.47	9.523	6.163	0.681339	0.264036	0.0427292	1.05386	0.0979534	0.00886857	3.86231	7.35292e-53	2.02516e-55	NA	K10747//DNA ligase 1 [EC:6.5.1.1 6.5.1.6 6.5.1.7]+ko03420//Nucleotide excision repair+ko03030//DNA replication+ko03410//Base excision repair+ko03430//Mismatch repair;K05747//Wiskott-Aldrich syndrome protein+ko04144//Endocytosis	CAA69032.1|5.4e-12|pherophorin-S [Volvox carteri f. nagariensis]	NA
LOC110684260	XM_021860697.1	0.2	0.02	0.02	0.006	0.326826	0.897239	0.57817	0.314439	0.919583	0.593946	3.3392	0.00117113	0.000170651	NA	K10798//poly [ADP-ribose] polymerase [EC:2.4.2.30]+ko03410//Base excision repair	XP_021716389.1|0.0e+00|poly [ADP-ribose] polymerase 3-like [Chenopodium quinoa]	GO:0071704//organic substance metabolic process;GO:0006807//nitrogen compound metabolic process;GO:0043412//macromolecule modification;GO:0044267//cellular protein metabolic process;GO:0044237//cellular metabolic process;GO:0006464//cellular protein modification process;GO:0036211//protein modification process;GO:0044238//primary metabolic process;GO:0006471//protein ADP-ribosylation;GO:0009987//…
LOC110684267	XM_021860706.1	16.716	3.31	7.766	4.683	0.765125	0.156165	0.017739	-0.33659	0.843958	0.393387	2.00832	1.24988e-08	6.51631e-10	NA	K16465//centrin-1	XP_021716398.1|1.5e-59|calcium-binding protein PBP1-like [Chenopodium quinoa]	GO:0005509//calcium ion binding;GO:0046872//metal ion binding;GO:0005488//binding;GO:0043167//ion binding;GO:0043169//cation binding;
LOC110684289	XM_021860728.1	5.06	3.683	4.893	2.66	0.942309	0.00103209	2.34428e-05	0.563747	0.282351	0.0422763	1.14238	1.22622e-05	1.0895e-06	NA	K02986//small subunit ribosomal protein S4+ko03010//Ribosome	XP_021716420.1|0.0e+00|neutral/alkaline invertase 3, chloroplastic-like [Chenopodium quinoa]	GO:0004553//hydrolase activity, hydrolyzing O-glycosyl compounds;GO:0016798//hydrolase activity, acting on glycosyl bonds;GO:0016787//hydrolase activity;GO:0140096//catalytic activity, acting on a protein;GO:0003824//catalytic activity;GO:0033926//glycopeptide alpha-N-acetylgalactosaminidase activity;GO:0140103//catalytic activity, acting on a glycoprotein;
LOC110684298	XM_021860738.1	45.38	26.503	29.04	22.403	0.438116	0.253473	0.0397711	0.332544	0.757341	0.288992	1.22561	1.3185e-06	9.55329e-08	NA	K20359//PRA1 family protein 1	XP_021716430.1|1.4e-128|PRA1 family protein F3-like [Chenopodium quinoa]	GO:0016020//membrane;GO:0110165//cellular anatomical entity;GO:0016021//integral component of membrane;GO:0031224//intrinsic component of membrane;
LOC110684342	BGI_novel_T006537,XM_021860789.1,XM_021860788.1	8.49	3.126	3.41	1.876	0.971664	0.00909353	0.00033603	0.948813	0.0485445	0.00342637	2.52593	1.69744e-25	1.88845e-27	NA	K15084//solute carrier family 25 (mitochondrial carrier protein), member 16;K15084//solute carrier family 25 (mitochondrial carrier protein), member 16;K15084//solute carrier family 25 (mitochondrial carrier protein), member 16	XP_021716480.1|2.3e-192|mitochondrial carrier protein CoAc1-like isoform X1 [Chenopodium quinoa]	GO:0006811//ion transport;GO:0009987//cellular process;GO:0071106//adenosine 3',5'-bisphosphate transmembrane transport;GO:0071702//organic substance transport;GO:0015868//purine ribonucleotide transport;GO:0034220//ion transmembrane transport;GO:0006810//transport;GO:0035349//coenzyme A transmembrane transport;GO:0051234//establishment of localization;GO:1901264//carbohydrate derivative transpor…
LOC110684346	XM_021860794.1	15.8	5.88	8.663	5.71	0.654622	0.0653754	0.00472698	0.154095	0.860106	0.421835	1.68457	1.36712e-23	1.68996e-25	NA	K01530//phospholipid-translocating ATPase [EC:7.6.2.1]	XP_021862041.1|0.0e+00|probable phospholipid-transporting ATPase 4 [Spinacia oleracea]	GO:0015711//organic anion transport;GO:0033036//macromolecule localization;GO:0071702//organic substance transport;GO:0010876//lipid localization;GO:0015914//phospholipid transport;GO:0006810//transport;GO:0015748//organophosphate ester transport;GO:0051179//localization;GO:0006820//anion transport;GO:0006811//ion transport;GO:0051234//establishment of localization;GO:0006869//lipid transport;GO:…
LOC110684388	XM_021860844.1	182.533	71.906	92.416	42.486	0.938128	0.40478	0.0920737	0.771681	0.464196	0.098739	2.20233	3.98192e-06	3.16837e-07	NA	K20623//typhasterol/6-deoxotyphasterol 2alpha-hydroxylase+ko00905//Brassinosteroid biosynthesis+ko01100//Metabolic pathways+ko01110//Biosynthesis of secondary metabolites	XP_021716536.1|2.3e-302|cytochrome P450 71A1-like [Chenopodium quinoa]	NA
LOC110684390	XM_021860845.1	0.506	0.323	0.596	0.153	1.11396	0.457709	0.117322	0.774538	0.735695	0.26915	1.70602	0.038883	0.00997646	NA	K20623//typhasterol/6-deoxotyphasterol 2alpha-hydroxylase+ko00905//Brassinosteroid biosynthesis+ko01100//Metabolic pathways+ko01110//Biosynthesis of secondary metabolites	XP_021716537.1|3.3e-304|cytochrome P450 71A1-like [Chenopodium quinoa]	NA
LOC110684404	BGI_novel_T006544,XM_021860857.1	7.016	3.636	3.95	2.983	0.474349	0.0650341	0.00468955	0.383484	0.465671	0.0992467	1.44152	1.68527e-15	4.04587e-17	NA	K13806//sn1-specific diacylglycerol lipase [EC:3.1.1.-];K13806//sn1-specific diacylglycerol lipase [EC:3.1.1.-]	XP_021716549.1|0.0e+00|uncharacterized protein LOC110684404 [Chenopodium quinoa]	GO:1901575//organic substance catabolic process;GO:0044238//primary metabolic process;GO:0008152//metabolic process;GO:0006629//lipid metabolic process;GO:0071704//organic substance metabolic process;GO:0016042//lipid catabolic process;GO:0009056//catabolic process;
LOC110684405	XM_021860858.1,BGI_novel_T006545	15.733	5.676	8.27	6.11	0.4534	0.634543	0.228297	0.00793437	0.998482	0.982238	1.54453	1.12005e-05	9.86509e-07	NA	K00789//S-adenosylmethionine synthetase [EC:2.5.1.6]+ko01230//Biosynthesis of amino acids+ko01100//Metabolic pathways+ko01110//Biosynthesis of secondary metabolites+ko00270//Cysteine and methionine metabolism;K00789//S-adenosylmethionine synthetase [EC:2.5.1.6]+ko01230//Biosynthesis of amino acids+ko01100//Metabolic pathways+ko01110//Biosynthesis of secondary metabolites+ko00270//Cysteine and met…	XP_021716550.1|0.0e+00|uncharacterized protein LOC110684405 [Chenopodium quinoa]	NA
LOC110684452	XM_021860910.1,BGI_novel_T006446	1.3	0.736	1.233	0.75	0.816667	0.173561	0.0211556	0.158849	0.919583	0.688405	1.08613	0.0203959	0.00462272	GRAS	K14494//DELLA protein+ko04075//Plant hormone signal transduction;K14494//DELLA protein+ko04075//Plant hormone signal transduction	XP_021716602.1|0.0e+00|scarecrow-like protein 30 [Chenopodium quinoa]	NA
LOC110684455	BGI_novel_T000658,XM_021860916.1,BGI_novel_T000657	6.293	0.516	1.043	0.49	1.20977	0.118331	0.0114601	0.444491	0.903342	0.502855	4.22608	1.96446e-30	1.67429e-32	NA	NA	XP_021716608.1|5.0e-153|uncharacterized protein LOC110684455 [Chenopodium quinoa]	NA
LOC110684477	XM_021860934.1	18.43	4.183	9.01	3.523	1.21628	0.191383	0.0246638	0.344717	0.854077	0.407101	2.45872	9.10292e-07	6.40014e-08	NA	K13680//beta-mannan synthase [EC:2.4.1.32]	XP_021716626.1|2.1e-111|uncharacterized protein LOC110684477 [Chenopodium quinoa]	GO:0010035//response to inorganic substance;GO:0009414//response to water deprivation;GO:0001101//response to acid chemical;GO:0006950//response to stress;GO:0042221//response to chemical;GO:0009415//response to water;GO:0009269//response to desiccation;GO:0009628//response to abiotic stimulus;GO:1901700//response to oxygen-containing compound;GO:0050896//response to stimulus;GO:0110165//cellular…
LOC110684478	XM_021860935.1	0.41	0.04	0.02	0	0.124653	0.898091	0.663408	0.392487	0.85551	0.414056	3.34862	0.00297464	0.000493762	NA	K01381//saccharopepsin [EC:3.4.23.25];K22683//aspartyl protease family protein [EC:3.4.23.-]	XP_021716627.1|2.9e-209|aspartyl protease UND-like [Chenopodium quinoa]	NA
LOC110684538	BGI_novel_T006564,BGI_novel_T006562,XM_021860980.1,BGI_novel_T006563,XM_021860981.1,BGI_novel_T006561,XM_021860979.1	43.956	16.113	29.63	20.493	0.54929	0.337451	0.0654305	-0.262577	0.752835	0.285341	1.19607	0.00027591	3.36877e-05	NA	K09874//aquaporin NIP;K09874//aquaporin NIP;K09874//aquaporin NIP;K09874//aquaporin NIP;K09874//aquaporin NIP;K09874//aquaporin NIP	XP_021757946.1|2.9e-131|uncharacterized protein LOC110722982 [Chenopodium quinoa]	NA
LOC110684634	XM_021861066.1	4.876	2.02	2.756	1.79	0.617571	0.497194	0.13585	0.256964	0.919583	0.599734	1.58139	0.000736481	0.000100703	NA	K05747//Wiskott-Aldrich syndrome protein+ko04144//Endocytosis	CAA69032.1|1.9e-10|pherophorin-S [Volvox carteri f. nagariensis]	NA
LOC110684641	XM_021861072.1	12.966	7.15	7.573	4.996	0.650752	0.185975	0.0236438	0.611702	0.18159	0.0217714	1.5831	7.71489e-10	3.39642e-11	NA	K10352//myosin heavy chain;K20478//golgin subfamily B member 1	XP_021716764.1|0.0e+00|protein NETWORKED 4A-like [Chenopodium quinoa]	GO:0005515//protein binding;GO:0003779//actin binding;GO:0008092//cytoskeletal protein binding;GO:0005488//binding;
LOC110684652	XM_021861088.1	23.843	10.956	7.906	6.36	0.379363	0.573471	0.183126	0.859735	0.106116	0.00993193	2.09588	2.02063e-13	5.9991e-15	NA	K12761//carbon catabolite-derepressing protein kinase [EC:2.7.11.1]	XP_021716780.1|1.1e-277|CBL-interacting serine/threonine-protein kinase 11-like [Chenopodium quinoa]	GO:0007154//cell communication;GO:0050896//response to stimulus;GO:0023052//signaling;GO:0050794//regulation of cellular process;GO:0050789//regulation of biological process;GO:0009987//cellular process;GO:0065007//biological regulation;GO:0051716//cellular response to stimulus;GO:0007165//signal transduction;GO:1901363//heterocyclic compound binding;GO:0000166//nucleotide binding;GO:0016773//pho…
LOC110684665	XM_021861100.1	4.173	3.91	2.893	2.38	0.365639	0.617295	0.214619	0.813382	0.0220029	0.00123517	1.02097	0.000167212	1.92956e-05	NA	K13424//WRKY transcription factor 33+ko04016//MAPK signaling pathway - plant+ko04626//Plant-pathogen interaction	XP_021716792.1|4.0e-111|protein LURP-one-related 7-like [Chenopodium quinoa]	NA
LOC110684666	XM_021861101.1	28.746	6.856	8.573	4.026	1.01851	0.295294	0.051843	0.759153	0.572978	0.150404	2.86217	2.36144e-07	1.52151e-08	NA	K09841//xanthoxin dehydrogenase [EC:1.1.1.288]+ko00906//Carotenoid biosynthesis+ko01100//Metabolic pathways+ko01110//Biosynthesis of secondary metabolites	XP_021716793.1|1.3e-172|short-chain dehydrogenase reductase 2a-like [Chenopodium quinoa]	NA
LOC110684734	XM_021861174.1	2.573	0.403	1.043	0.273	1.44352	0.178122	0.0221006	0.356349	0.919583	0.625344	3.18648	7.41873e-08	4.39512e-09	NA	K13258//2-hydroxyisoflavanone dehydratase [EC:4.2.1.105]+ko01110//Biosynthesis of secondary metabolites+ko00943//Isoflavonoid biosynthesis	XP_021716866.1|2.0e-178|2-hydroxyisoflavanone dehydratase-like [Chenopodium quinoa]	GO:0003824//catalytic activity;GO:0016787//hydrolase activity;
LOC110684809	XM_021861241.1	6.856	2.703	5.113	2.88	0.845602	0.0929832	0.00790331	0.0221845	0.995356	0.941423	1.45217	3.14516e-08	1.75501e-09	NA	K06630//14-3-3 protein epsilon	XP_021716933.1|5.7e-129|uncharacterized protein LOC110684809 [Chenopodium quinoa]	NA
LOC110684952	XM_021861398.1	7.203	2.66	3.906	1.896	0.846067	0.539889	0.161961	0.499993	0.860106	0.423368	1.98483	0.001314	0.000194659	NA	NA	XP_021717090.1|6.6e-28|uncharacterized protein LOC110684952 [Chenopodium quinoa]	NA
LOC110684956	XM_021861401.1	1.436	0.456	1.413	0.323	1.72416	0.0523633	0.00344485	0.524215	0.798195	0.332406	2.10652	0.00423438	0.000741344	NA	K13449//pathogenesis-related protein 1+ko04016//MAPK signaling pathway - plant+ko04626//Plant-pathogen interaction+ko04075//Plant hormone signal transduction	XP_021717093.1|1.5e-92|pathogenesis-related protein 1B-like [Chenopodium quinoa]	NA
LOC110685041	XM_021861502.1	14.263	0.22	0.36	0.746	-0.77698	0.597526	0.199079	-1.30234	0.211828	0.0274308	4.27412	4.41784e-24	5.31739e-26	bHLH	K14963//COMPASS component SWD3;K13422//transcription factor MYC2+ko04016//MAPK signaling pathway - plant+ko04075//Plant hormone signal transduction	XP_021717194.1|3.1e-208|transcription factor bHLH18-like [Chenopodium quinoa]	GO:0005488//binding;GO:0046983//protein dimerization activity;GO:0005515//protein binding;
LOC110685047	XM_021861513.1	8.423	4.523	7.156	3.953	0.9157	0.0528894	0.00350252	0.304473	0.680024	0.220711	1.29993	9.86161e-06	8.58889e-07	NA	K15718//linoleate 9S-lipoxygenase [EC:1.13.11.58]+ko00591//Linoleic acid metabolism	XP_021860211.1|0.0e+00|probable linoleate 9S-lipoxygenase 5 [Spinacia oleracea]	GO:0008610//lipid biosynthetic process;GO:0006629//lipid metabolic process;GO:0019752//carboxylic acid metabolic process;GO:0006631//fatty acid metabolic process;GO:0009058//biosynthetic process;GO:0043436//oxoacid metabolic process;GO:0031407//oxylipin metabolic process;GO:0046394//carboxylic acid biosynthetic process;GO:0044249//cellular biosynthetic process;GO:0044255//cellular lipid metabolic…
LOC110685075	XM_021861539.1,BGI_novel_T000663,XM_021861546.1	34.5	23.393	25.67	20.056	0.433303	0.0237492	0.00117983	0.334877	0.175631	0.0207606	1.00612	3.80624e-08	2.14617e-09	NA	K03126//transcription initiation factor TFIID subunit 12+ko03022//Basal transcription factors;K11406//histone deacetylase 4/5 [EC:3.5.1.98];K03126//transcription initiation factor TFIID subunit 12+ko03022//Basal transcription factors;K11406//histone deacetylase 4/5 [EC:3.5.1.98];K11406//histone deacetylase 4/5 [EC:3.5.1.98];K14972//PAX-interacting protein 1	XP_021717238.1|0.0e+00|protein TIME FOR COFFEE-like isoform X2 [Chenopodium quinoa]	GO:0050789//regulation of biological process;GO:0065007//biological regulation;GO:0042752//regulation of circadian rhythm;
LOC110685088	BGI_novel_T006688,XM_021861552.1	3.203	0.303	0.453	0.16	1.27176	0.19825	0.0260877	0.810954	0.625722	0.180963	4.29741	4.05983e-20	6.55933e-22	NA	K04733//interleukin-1 receptor-associated kinase 4 [EC:2.7.11.1];K04733//interleukin-1 receptor-associated kinase 4 [EC:2.7.11.1]	XP_021717244.1|0.0e+00|wall-associated receptor kinase-like 6 [Chenopodium quinoa]	GO:0016020//membrane;GO:0016021//integral component of membrane;GO:0031224//intrinsic component of membrane;GO:0110165//cellular anatomical entity;GO:0016788//hydrolase activity, acting on ester bonds;GO:0036094//small molecule binding;GO:0005488//binding;GO:0016773//phosphotransferase activity, alcohol group as acceptor;GO:0016740//transferase activity;GO:0004721//phosphoprotein phosphatase acti…
LOC110685099	XM_021861563.1	2.25	0.07	0.023	0	0.124653	0.898091	0.663408	0.736327	0.682481	0.222993	5.34509	8.00097e-09	4.06563e-10	bHLH	K14963//COMPASS component SWD3;K13422//transcription factor MYC2+ko04016//MAPK signaling pathway - plant+ko04075//Plant hormone signal transduction	XP_021717255.1|1.5e-180|transcription factor bHLH18-like [Chenopodium quinoa]	NA
LOC110685172	XM_021861637.1	13.883	3	3.276	1.92	0.809241	0.103492	0.00930805	0.719787	0.292903	0.0450496	3.03495	9.17606e-35	6.00978e-37	AP2-EREBP	K09286//EREBP-like factor	XP_021717329.1|1.0e-240|ethylene-responsive transcription factor ERF054-like [Chenopodium quinoa]	GO:0043229//intracellular organelle;GO:0005622//intracellular;GO:0005634//nucleus;GO:0043231//intracellular membrane-bounded organelle;GO:0043227//membrane-bounded organelle;GO:0110165//cellular anatomical entity;GO:0043226//organelle;GO:0005488//binding;GO:0097159//organic cyclic compound binding;GO:0140110//transcription regulator activity;GO:0003700//DNA-binding transcription factor activity;G…
LOC110685195	XM_021861674.1	24.903	16.233	16.073	14.413	0.243556	0.832188	0.458794	0.279419	0.820947	0.363059	1.00189	0.00936067	0.00185667	NA	K10666//E3 ubiquitin-protein ligase RNF5 [EC:2.3.2.27]+ko04141//Protein processing in endoplasmic reticulum	XP_021717366.1|6.3e-153|E3 ubiquitin-protein ligase RMA1H1-like [Chenopodium quinoa]	GO:0110165//cellular anatomical entity;GO:0031224//intrinsic component of membrane;GO:0016020//membrane;GO:0016021//integral component of membrane;
LOC110685212	XM_021861694.1,XM_021861693.1	2.763	2.083	2.063	1.34	0.672426	0.256741	0.0408296	0.70951	0.280777	0.0418869	1.2411	0.000918014	0.000129367	NA	K00670//N-alpha-acetyltransferase 30 [EC:2.3.1.256];K00670//N-alpha-acetyltransferase 30 [EC:2.3.1.256]	XP_021717385.1|8.6e-84|N-alpha-acetyltransferase 11 [Chenopodium quinoa]	GO:0003824//catalytic activity;GO:0016747//transferase activity, transferring acyl groups other than amino-acyl groups;GO:0016740//transferase activity;GO:0008080//N-acetyltransferase activity;GO:0016746//transferase activity, transferring acyl groups;GO:0016407//acetyltransferase activity;GO:0016410//N-acyltransferase activity;
LOC110685232	XM_021861721.1,XM_021861720.1	1.76	0.663	0.456	0.186	0.75696	0.582134	0.18884	1.2705	0.192396	0.023813	2.92679	3.40597e-09	1.63536e-10	NA	K13181//ATP-dependent RNA helicase DDX27 [EC:3.6.4.13];K13181//ATP-dependent RNA helicase DDX27 [EC:3.6.4.13]	XP_021717412.1|1.0e-231|uncharacterized protein LOC110685232 [Chenopodium quinoa]	NA
LOC110685243	XM_021861736.1,XM_021861737.1,XM_021861735.1	7.04	4.336	4.98	4.13	0.351192	0.510376	0.143207	0.175306	0.854077	0.406344	1.00117	3.46439e-05	3.38543e-06	NA	NA	XP_021717427.1|0.0e+00|uncharacterized protein LOC110685243 [Chenopodium quinoa]	NA
LOC110685343	XM_021861852.1	2.776	1.346	2.076	1.42	0.56709	0.433607	0.105325	0.0294316	0.994936	0.940535	1.17527	1.49302e-09	6.82868e-11	NA	K10706//senataxin [EC:3.6.4.-]	XP_021717544.1|0.0e+00|uncharacterized protein LOC110685343 [Chenopodium quinoa]	GO:0000166//nucleotide binding;GO:1901265//nucleoside phosphate binding;GO:0005488//binding;GO:0043168//anion binding;GO:0097159//organic cyclic compound binding;GO:0043167//ion binding;GO:0032555//purine ribonucleotide binding;GO:0097367//carbohydrate derivative binding;GO:0036094//small molecule binding;GO:0030554//adenyl nucleotide binding;GO:1901363//heterocyclic compound binding;GO:0032553//…
LOC110685369	XM_021861895.1,XM_021861896.1,BGI_novel_T006773,XM_021861894.1,BGI_novel_T006772	5.666	3.62	4.08	3.023	0.505966	0.346418	0.0687557	0.349495	0.759572	0.291609	1.14506	0.0027296	0.000447169	NA	NA	XP_021717588.1|0.0e+00|SPX domain-containing membrane protein At4g22990-like isoform X3 [Chenopodium quinoa]	GO:0110165//cellular anatomical entity;GO:0016021//integral component of membrane;GO:0031224//intrinsic component of membrane;GO:0016020//membrane;GO:0005215//transporter activity;GO:0022857//transmembrane transporter activity;
LOC110685373	XM_021861900.1,XM_021861901.1,BGI_novel_T006774	12.646	6.11	7.763	4.283	0.924732	2.29618e-05	2.70786e-07	0.620868	0.000784618	2.27398e-05	1.78241	5.59257e-27	5.74891e-29	NA	K01115//phospholipase D1/2 [EC:3.1.4.4]+ko04144//Endocytosis+ko01100//Metabolic pathways+ko01110//Biosynthesis of secondary metabolites+ko00564//Glycerophospholipid metabolism+ko00565//Ether lipid metabolism;K01115//phospholipase D1/2 [EC:3.1.4.4]+ko04144//Endocytosis+ko01100//Metabolic pathways+ko01110//Biosynthesis of secondary metabolites+ko00564//Glycerophospholipid metabolism+ko00565//Ether …	XP_021717593.1|0.0e+00|phospholipase D beta 1-like isoform X2 [Chenopodium quinoa]	GO:0003824//catalytic activity;
LOC110685375	BGI_novel_T006775,XM_021861903.1	3.906	1.023	0.513	0.543	-0.00795836	0.999966	0.987623	0.817915	0.602603	0.167617	2.84309	9.83908e-07	6.96253e-08	NA	K15333//tRNA guanosine-2'-O-methyltransferase [EC:2.1.1.34];K12619//5'-3' exoribonuclease 2 [EC:3.1.13.-]+ko03018//RNA degradation+ko03008//Ribosome biogenesis in eukaryotes;K13199//plasminogen activator inhibitor 1 RNA-binding protein;K14568//rRNA small subunit pseudouridine methyltransferase Nep1 [EC:2.1.1.260]+ko03008//Ribosome biogenesis in eukaryotes;K15333//tRNA guanosine-2'-O-methyltransfe…	XP_021717595.1|0.0e+00|subtilisin-like protease SBT1.1 [Chenopodium quinoa]	GO:0070011//peptidase activity, acting on L-amino acid peptides;GO:0008233//peptidase activity;GO:0008236//serine-type peptidase activity;GO:0017171//serine hydrolase activity;GO:0004252//serine-type endopeptidase activity;GO:0016825//hydrolase activity, acting on acid phosphorus-nitrogen bonds;GO:0016787//hydrolase activity;GO:0140096//catalytic activity, acting on a protein;GO:0004175//endopept…
LOC110685392	BGI_novel_T006755,XM_021861923.1	13.853	7.266	7.1	3.66	0.947785	0.197182	0.0258625	0.939255	0.296163	0.0458819	2.05055	2.21493e-06	1.68121e-07	NA	K15095//(+)-neomenthol dehydrogenase [EC:1.1.1.208]+ko00902//Monoterpenoid biosynthesis+ko01110//Biosynthesis of secondary metabolites;K15095//(+)-neomenthol dehydrogenase [EC:1.1.1.208]+ko00902//Monoterpenoid biosynthesis+ko01110//Biosynthesis of secondary metabolites	XP_021717615.1|2.2e-261|LOW QUALITY PROTEIN: (+)-neomenthol dehydrogenase-like [Chenopodium quinoa]	NA
LOC110685489	XM_021862021.1	247.646	91.13	247.773	77.693	1.46393	0.0595881	0.00413707	0.315232	0.892263	0.484217	1.77915	0.00224973	0.000358163	NA	NA	XP_021717713.1|2.2e-72|uncharacterized protein LOC110685489 [Chenopodium quinoa]	NA
LOC110685498	XM_021862028.1,XM_021862027.1	11.66	5.033	5.663	3.53	0.711086	0.2518	0.039034	0.610238	0.268134	0.038995	1.91685	2.85938e-10	1.19743e-11	NA	K04733//interleukin-1 receptor-associated kinase 4 [EC:2.7.11.1];K04733//interleukin-1 receptor-associated kinase 4 [EC:2.7.11.1]	XP_021717719.1|1.3e-238|probable serine/threonine-protein kinase CST isoform X1 [Chenopodium quinoa]	NA
LOC110685520	XM_021862059.1	15.846	8.03	9.573	7.55	0.422178	0.17464	0.0214034	0.207513	0.792839	0.324688	1.28862	5.85889e-11	2.24897e-12	NA	K14803//protein phosphatase PTC2/3 [EC:3.1.3.16]	XP_021717751.1|7.8e-230|probable protein phosphatase 2C 27 [Chenopodium quinoa]	GO:0016787//hydrolase activity;GO:0004722//protein serine/threonine phosphatase activity;GO:0043167//ion binding;GO:0042578//phosphoric ester hydrolase activity;GO:0046872//metal ion binding;GO:0004721//phosphoprotein phosphatase activity;GO:0016788//hydrolase activity, acting on ester bonds;GO:0043169//cation binding;GO:0140096//catalytic activity, acting on a protein;GO:0016791//phosphatase act…
LOC110685529	XM_021862067.1	0.823	0.356	0.51	0.453	0.249171	0.898091	0.580557	-0.186939	0.923571	0.701909	1.04808	0.0463364	0.0123792	NA	K08472//mlo protein	XP_021717759.1|8.4e-300|MLO-like protein 9 [Chenopodium quinoa]	GO:0006950//response to stress;GO:0006952//defense response;GO:0050896//response to stimulus;GO:0009607//response to biotic stimulus;GO:0016021//integral component of membrane;GO:0016020//membrane;GO:0031224//intrinsic component of membrane;GO:0110165//cellular anatomical entity;GO:0005516//calmodulin binding;GO:0005515//protein binding;GO:0005488//binding;
LOC110685603	XM_021862151.1	0.79	0.213	0.49	0.293	0.589018	0.751036	0.343471	-0.273643	0.919583	0.644249	1.5202	0.0208961	0.0047619	NA	K01762//1-aminocyclopropane-1-carboxylate synthase [EC:4.4.1.14]+ko01100//Metabolic pathways+ko01110//Biosynthesis of secondary metabolites+ko00270//Cysteine and methionine metabolism	XP_021713541.1|1.5e-272|1-aminocyclopropane-1-carboxylate synthase 9-like [Chenopodium quinoa]	GO:0009058//biosynthetic process;GO:0008152//metabolic process;GO:0030170//pyridoxal phosphate binding;GO:0003824//catalytic activity;GO:0016846//carbon-sulfur lyase activity;GO:0070279//vitamin B6 binding;GO:0019842//vitamin binding;GO:0097159//organic cyclic compound binding;GO:0036094//small molecule binding;GO:0043167//ion binding;GO:0005488//binding;GO:0016847//1-aminocyclopropane-1-carboxyl…
LOC110685604	XM_021862152.1	1.836	0.16	0.616	0.133	1.40724	0.258919	0.041367	0.186187	0.95447	0.798762	3.2737	0.000118229	1.31201e-05	NA	NA	XP_021717844.1|1.3e-70|uncharacterized protein LOC110685604 [Chenopodium quinoa]	NA
LOC110685610	XM_021862157.1	14.023	7.8	6.843	7.313	-0.00259146	0.999966	0.993544	0.206441	0.889282	0.47965	1.14398	0.000438926	5.64867e-05	NA	NA	XP_021717849.1|5.3e-82|uncharacterized protein LOC110685610 [Chenopodium quinoa]	NA
LOC110685637	XM_021862175.1	17.206	2.123	3.75	3.093	0.340784	0.788285	0.388876	-0.381557	0.829894	0.375251	2.50963	7.33399e-06	6.18708e-07	NA	K04733//interleukin-1 receptor-associated kinase 4 [EC:2.7.11.1]	XP_021717867.1|7.5e-235|receptor-like protein kinase FERONIA [Chenopodium quinoa]	NA
LOC110685657	XM_021862189.1	0.973	0.13	1.043	0.2	1.70339	0.111061	0.0103531	-0.282559	0.921515	0.696436	2.06557	0.0274921	0.00659593	NA	K15503//serine/threonine-protein phosphatase 6 regulatory ankyrin repeat subunit B;K15502//serine/threonine-protein phosphatase 6 regulatory ankyrin repeat subunit A	XP_021717881.1|1.6e-150|protein ACCELERATED CELL DEATH 6-like [Chenopodium quinoa]	NA
LOC110685729	BGI_novel_T006929,XM_021862252.1	2.556	0.433	0.836	0.3	1.0805	0.426104	0.101828	0.517926	0.854077	0.405986	2.82314	0.000468544	6.07641e-05	NA	K13415//protein brassinosteroid insensitive 1 [EC:2.7.10.1 2.7.11.1]+ko04075//Plant hormone signal transduction;K19613//leucine-rich repeat protein SHOC2;K13415//protein brassinosteroid insensitive 1 [EC:2.7.10.1 2.7.11.1]+ko04075//Plant hormone signal transduction	XP_021717944.1|0.0e+00|receptor-like protein 12 [Chenopodium quinoa]	GO:0016021//integral component of membrane;GO:0110165//cellular anatomical entity;GO:0016020//membrane;GO:0031224//intrinsic component of membrane;
LOC110685756	XM_021862276.1	1.88	1.51	1.123	0.943	0.30876	0.877765	0.532552	0.694343	0.577744	0.15299	1.16341	0.0455902	0.0121146	NA	NA	XP_021717968.1|4.3e-283|ACT domain-containing protein ACR1-like [Chenopodium quinoa]	NA
LOC110685757	XM_021862277.1	7.61	4.24	4.706	3.113	0.673837	0.0088976	0.000326423	0.550502	0.144059	0.0153372	1.50649	8.59268e-15	2.21568e-16	NA	NA	XP_021717969.1|8.0e-251|protein PHLOEM PROTEIN 2-LIKE A10-like [Chenopodium quinoa]	GO:0016021//integral component of membrane;GO:0110165//cellular anatomical entity;GO:0031224//intrinsic component of membrane;GO:0016020//membrane;
LOC110685758	XM_021862278.1	16.05	10.086	6.966	6.873	0.143616	0.938224	0.787638	0.622863	0.48139	0.106179	1.40996	0.000702001	9.5288e-05	NA	K09060//plant G-box-binding factor	XP_021717970.1|1.6e-203|basic leucine zipper 34-like [Chenopodium quinoa]	GO:0140110//transcription regulator activity;GO:0003700//DNA-binding transcription factor activity;
LOC110685827	XM_021862355.1	15.776	5.333	5.09	3.39	0.593503	0.562178	0.175576	0.674502	0.565272	0.146467	2.35297	6.89127e-08	4.05606e-09	NA	NA	XP_021718047.1|7.6e-101|uncharacterized protein LOC110685827 [Chenopodium quinoa]	NA
LOC110685834	XM_021862362.1	6.186	0.57	0.51	0.15	1.33334	0.247488	0.0380027	1.50613	0.156734	0.0174901	5.2627	1.25998e-28	1.1941e-30	NA	K08900//mitochondrial chaperone BCS1	XP_021718054.1|9.5e-299|LOW QUALITY PROTEIN: AAA-ATPase At3g50940-like [Chenopodium quinoa]	GO:1901265//nucleoside phosphate binding;GO:0043167//ion binding;GO:0035639//purine ribonucleoside triphosphate binding;GO:1901363//heterocyclic compound binding;GO:0032555//purine ribonucleotide binding;GO:0043168//anion binding;GO:0017076//purine nucleotide binding;GO:0097367//carbohydrate derivative binding;GO:0036094//small molecule binding;GO:0030554//adenyl nucleotide binding;GO:0000166//nu…
LOC110685901	XM_021862454.1,XM_021862453.1,XM_021862455.1,BGI_novel_T006842	47.166	20.893	29.213	19.163	0.661487	0.301688	0.0538309	0.234671	0.893341	0.485734	1.50448	8.02409e-05	8.52856e-06	NA	K03875//F-box and leucine-rich repeat protein 1 (S-phase kinase-associated protein 2)+ko04120//Ubiquitin mediated proteolysis;K03875//F-box and leucine-rich repeat protein 1 (S-phase kinase-associated protein 2)+ko04120//Ubiquitin mediated proteolysis;K03875//F-box and leucine-rich repeat protein 1 (S-phase kinase-associated protein 2)+ko04120//Ubiquitin mediated proteolysis;K03875//F-box and leu…	XP_021718145.1|5.1e-218|F-box protein SKP2A-like isoform X1 [Chenopodium quinoa]	NA
LOC110685903	XM_021862457.1	5.803	0.906	3.776	1.153	1.46228	0.130664	0.0133384	-0.214141	0.919583	0.565202	2.45708	4.44965e-08	2.54081e-09	NA	K00166//2-oxoisovalerate dehydrogenase E1 component alpha subunit [EC:1.2.4.4]+ko00280//Valine, leucine and isoleucine degradation+ko00640//Propanoate metabolism+ko01100//Metabolic pathways+ko01110//Biosynthesis of secondary metabolites	XP_021841783.1|1.5e-234|2-oxoisovalerate dehydrogenase subunit alpha 2, mitochondrial-like [Spinacia oleracea]	GO:0003824//catalytic activity;GO:0016491//oxidoreductase activity;GO:0016903//oxidoreductase activity, acting on the aldehyde or oxo group of donors;GO:0016624//oxidoreductase activity, acting on the aldehyde or oxo group of donors, disulfide as acceptor;
LOC110685932	XM_021862488.1	18.173	10.226	10.41	9.07	0.278289	0.55109	0.16901	0.285617	0.636381	0.188813	1.21754	1.21538e-10	4.84191e-12	NA	K22077//ganglioside-induced differentiation-associated protein 1	XP_021718180.1|1.2e-151|glutathione S-transferase TCHQD-like [Chenopodium quinoa]	NA
LOC110685944	XM_021862500.1	20.28	4.2	2.98	4.04	-0.30644	0.866242	0.514575	0.142739	0.94575	0.766246	2.45043	2.18678e-08	1.18755e-09	NA	K05933//aminocyclopropanecarboxylate oxidase [EC:1.14.17.4]+ko01100//Metabolic pathways+ko01110//Biosynthesis of secondary metabolites+ko00270//Cysteine and methionine metabolism	XP_021718192.1|3.0e-184|1-aminocyclopropane-1-carboxylate oxidase 5-like [Chenopodium quinoa]	GO:0043169//cation binding;GO:0016491//oxidoreductase activity;GO:0003824//catalytic activity;GO:0043167//ion binding;GO:0046872//metal ion binding;GO:0005488//binding;
LOC110685948	XM_021862504.1	37.67	18.736	21.83	14.493	0.671907	6.60521e-05	9.26264e-07	0.48431	0.0714715	0.00575229	1.59783	6.45853e-33	4.72019e-35	NA	K09526//DnaJ homolog subfamily C member 6+ko04144//Endocytosis;K18626//trichohyalin	XP_021718196.1|0.0e+00|auxilin-related protein 1-like [Chenopodium quinoa]	NA
LOC110685950	XM_021862506.1	4.533	2.233	3.553	1.836	0.755043	0.609712	0.208146	0.341897	0.902466	0.500905	1.45403	0.00110465	0.000159574	NA	K03283//heat shock 70kDa protein 1/2/6/8+ko03040//Spliceosome+ko04144//Endocytosis+ko04141//Protein processing in endoplasmic reticulum	XP_021718198.1|7.8e-135|probable mediator of RNA polymerase II transcription subunit 37c [Chenopodium quinoa]	GO:0016021//integral component of membrane;GO:0016020//membrane;GO:0031224//intrinsic component of membrane;GO:0110165//cellular anatomical entity;
LOC110686068	XM_021862654.1	17.076	2.92	2.083	1.73	0.306388	0.868768	0.517682	0.729202	0.639372	0.190873	3.40671	1.20944e-20	1.85176e-22	NA	NA	XP_021718346.1|1.4e-84|uncharacterized protein LOC110686068 [Chenopodium quinoa]	NA
LOC110686141	XM_021862724.1,XM_021862725.1	12.206	6.496	8.563	6.516	0.415808	0.790326	0.399709	0.103261	0.954518	0.799895	1.06314	0.0347236	0.00871272	NA	K00688//glycogen phosphorylase [EC:2.4.1.1]+ko01100//Metabolic pathways+ko00500//Starch and sucrose metabolism+ko01110//Biosynthesis of secondary metabolites;K00688//glycogen phosphorylase [EC:2.4.1.1]+ko01100//Metabolic pathways+ko00500//Starch and sucrose metabolism+ko01110//Biosynthesis of secondary metabolites	XP_021718417.1|0.0e+00|alpha-1,4 glucan phosphorylase L-2 isozyme, chloroplastic/amyloplastic-like isoform X2 [Chenopodium quinoa]	NA
LOC110686150	XM_021862738.1	570.026	259.213	287.96	213.373	0.461934	0.536499	0.159482	0.385824	0.604483	0.168946	1.60765	2.47314e-07	1.59777e-08	NA	NA	XP_021718430.1|3.6e-64|nodulin-related protein 1-like [Chenopodium quinoa]	GO:0010565//regulation of cellular ketone metabolic process;GO:0019222//regulation of metabolic process;GO:0006950//response to stress;GO:0019216//regulation of lipid metabolic process;GO:0031323//regulation of cellular metabolic process;GO:0009266//response to temperature stimulus;GO:0050794//regulation of cellular process;GO:0046890//regulation of lipid biosynthetic process;GO:0080090//regulati…
LOC110686167	XM_021862758.1	28.866	15.136	10.43	15.426	-0.478673	0.301688	0.0538171	0.0912343	0.919583	0.666614	1.12189	4.11891e-06	3.29245e-07	NA	K09338//homeobox-leucine zipper protein	XP_021718450.1|6.3e-158|homeobox-leucine zipper protein HAT22-like [Chenopodium quinoa]	GO:0051171//regulation of nitrogen compound metabolic process;GO:0010468//regulation of gene expression;GO:0060255//regulation of macromolecule metabolic process;GO:0019219//regulation of nucleobase-containing compound metabolic process;GO:0065007//biological regulation;GO:0006355//regulation of transcription, DNA-templated;GO:2000112//regulation of cellular macromolecule biosynthetic process;GO:…
LOC110686176	XM_021862770.1	0.233	0.066	0.05	0.006	1.02636	0.51323	0.145405	1.08716	0.527781	0.127121	3.37269	0.0010037	0.000142965	NA	K04733//interleukin-1 receptor-associated kinase 4 [EC:2.7.11.1];K04730//interleukin-1 receptor-associated kinase 1 [EC:2.7.11.1]	XP_021718462.1|0.0e+00|proline-rich receptor-like protein kinase PERK4 [Chenopodium quinoa]	NA
LOC110686199	XM_021862798.1	26.58	16.216	20.876	14.58	0.586714	0.0159936	0.000698662	0.261136	0.629255	0.183901	1.08069	5.90648e-06	4.88289e-07	GRAS	K14494//DELLA protein+ko04075//Plant hormone signal transduction	XP_021718490.1|0.0e+00|scarecrow-like protein 15 [Chenopodium quinoa]	GO:0030154//cell differentiation;GO:0051239//regulation of multicellular organismal process;GO:0048869//cellular developmental process;GO:0050789//regulation of biological process;GO:0065007//biological regulation;GO:0048831//regulation of shoot system development;GO:0009987//cellular process;GO:2000026//regulation of multicellular organismal development;GO:0032502//developmental process;GO:00507…
LOC110686211	XM_021862815.1	4.976	3.616	3.53	2.106	0.796585	0.0754021	0.00586945	0.873693	0.00252917	9.10298e-05	1.45095	3.41557e-11	1.27479e-12	NA	K04733//interleukin-1 receptor-associated kinase 4 [EC:2.7.11.1]	XP_021718507.1|1.9e-226|UPF0496 protein At4g34320-like [Chenopodium quinoa]	GO:0110165//cellular anatomical entity;GO:0016021//integral component of membrane;GO:0016020//membrane;GO:0031224//intrinsic component of membrane;
LOC110686217	XM_021862826.1,BGI_novel_T006955	19.51	20.85	19.173	9.713	0.958782	0.138419	0.014634	0.985681	0.093596	0.00831721	1.08193	0.0200442	0.00452866	NA	K20858//calcium uniporter protein, mitochondrial;K20858//calcium uniporter protein, mitochondrial	XP_021718518.1|1.8e-191|calcium uniporter protein 2, mitochondrial-like [Chenopodium quinoa]	GO:0072503//cellular divalent inorganic cation homeostasis;GO:0055082//cellular chemical homeostasis;GO:0050801//ion homeostasis;GO:0006875//cellular metal ion homeostasis;GO:0055080//cation homeostasis;GO:0072507//divalent inorganic cation homeostasis;GO:0006873//cellular ion homeostasis;GO:0065007//biological regulation;GO:0030003//cellular cation homeostasis;GO:0055065//metal ion homeostasis;G…
LOC110686219	XM_021862828.1,XM_021862830.1,XM_021862829.1	4.906	4.066	3.466	2.333	0.622349	0.293491	0.0512045	0.87702	0.145779	0.0155938	1.25322	0.000316654	3.92287e-05	NA	K10666//E3 ubiquitin-protein ligase RNF5 [EC:2.3.2.27]+ko04141//Protein processing in endoplasmic reticulum;K10666//E3 ubiquitin-protein ligase RNF5 [EC:2.3.2.27]+ko04141//Protein processing in endoplasmic reticulum;K10666//E3 ubiquitin-protein ligase RNF5 [EC:2.3.2.27]+ko04141//Protein processing in endoplasmic reticulum	XP_021718520.1|5.2e-152|E3 ubiquitin-protein ligase RNF185-like isoform X1 [Chenopodium quinoa]	NA
LOC110686354	XM_021862946.1	42.253	18.253	24.786	13.803	0.882885	0.0731021	0.00555974	0.493109	0.538876	0.13302	1.80212	6.68523e-09	3.35341e-10	NA	K00924//kinase [EC:2.7.1.-]	XP_021718638.1|0.0e+00|receptor-like protein kinase HAIKU2 [Chenopodium quinoa]	GO:0016020//membrane;GO:0110165//cellular anatomical entity;GO:0031224//intrinsic component of membrane;GO:0016021//integral component of membrane;GO:0043167//ion binding;GO:0140096//catalytic activity, acting on a protein;GO:0016772//transferase activity, transferring phosphorus-containing groups;GO:0003824//catalytic activity;GO:0004672//protein kinase activity;GO:0035639//purine ribonucleoside…
LOC110686376	XM_021862977.1,XM_021862976.1	18.176	7.206	8.516	4.636	0.931727	0.0421202	0.00250288	0.728991	0.178267	0.0211855	2.17063	2.82565e-16	6.30565e-18	NA	K22522//cytokinin riboside 5'-monophosphate phosphoribohydrolase [EC:3.2.2.-];K22522//cytokinin riboside 5'-monophosphate phosphoribohydrolase [EC:3.2.2.-]	XP_021718668.1|1.7e-126|probable cytokinin riboside 5'-monophosphate phosphoribohydrolase LOGL10 isoform X1 [Chenopodium quinoa]	GO:0042446//hormone biosynthetic process;GO:0010817//regulation of hormone levels;GO:0009987//cellular process;GO:0044249//cellular biosynthetic process;GO:0065008//regulation of biological quality;GO:0009691//cytokinin biosynthetic process;GO:1901564//organonitrogen compound metabolic process;GO:0006807//nitrogen compound metabolic process;GO:0009308//amine metabolic process;GO:0044237//cellular…
LOC110686407	XM_021863019.1,BGI_novel_T006984	5.623	3.973	3.97	2.616	0.677014	0.0173684	0.000775847	0.70412	0.00457628	0.000183456	1.32283	7.4774e-14	2.12431e-15	NA	K04733//interleukin-1 receptor-associated kinase 4 [EC:2.7.11.1];K04733//interleukin-1 receptor-associated kinase 4 [EC:2.7.11.1]	XP_021718711.1|0.0e+00|inactive protein kinase SELMODRAFT_444075-like [Chenopodium quinoa]	GO:0016772//transferase activity, transferring phosphorus-containing groups;GO:0016740//transferase activity;GO:0035639//purine ribonucleoside triphosphate binding;GO:0003824//catalytic activity;GO:0005524//ATP binding;GO:0097159//organic cyclic compound binding;GO:0005488//binding;GO:0016773//phosphotransferase activity, alcohol group as acceptor;GO:0140096//catalytic activity, acting on a prote…
LOC110686424	XM_021863037.1	23.423	16.283	19.74	11.87	0.783431	0.0456357	0.00281333	0.555772	0.217897	0.0285921	1.19182	2.84819e-05	2.73023e-06	NA	K13963//serpin B	XP_021726663.1|1.9e-207|serpin-ZX-like [Chenopodium quinoa]	GO:0005576//extracellular region;GO:0005615//extracellular space;GO:0110165//cellular anatomical entity;
LOC110686432	XM_021863051.1	32.63	16.57	16.46	10.443	0.722149	0.0700502	0.00521978	0.761661	0.0327394	0.00205221	1.84994	1.89667e-13	5.62285e-15	NA	K12812//ATP-dependent RNA helicase UAP56/SUB2 [EC:3.6.4.13]+ko03040//Spliceosome+ko03015//mRNA surveillance pathway+ko03013//RNA transport;K04733//interleukin-1 receptor-associated kinase 4 [EC:2.7.11.1];K19307//25S rRNA (uracil2634-N3)-methyltransferase [EC:2.1.1.313];K18081//myotubularin-related protein 1/2 [EC:3.1.3.64 3.1.3.95]+ko01100//Metabolic pathways+ko04070//Phosphatidylinositol signali…	XP_021718743.1|0.0e+00|uncharacterized protein LOC110686432 [Chenopodium quinoa]	NA
LOC110686436	XM_021863056.1	4.253	3.57	2.463	2.236	0.214762	0.898091	0.602335	0.735728	0.311246	0.0496232	1.10972	0.0089462	0.00175855	NA	NA	XP_021718748.1|4.7e-198|uncharacterized protein LOC110686436 [Chenopodium quinoa]	NA
LOC110686667	XM_021863275.1,XM_021863277.1	22.713	8.556	16.01	12.593	0.419378	0.573471	0.183027	-0.423415	0.539884	0.133755	1.06461	0.00615806	0.00114104	NA	K16055//trehalose 6-phosphate synthase/phosphatase [EC:2.4.1.15 3.1.3.12]+ko01100//Metabolic pathways+ko00500//Starch and sucrose metabolism;K16055//trehalose 6-phosphate synthase/phosphatase [EC:2.4.1.15 3.1.3.12]+ko01100//Metabolic pathways+ko00500//Starch and sucrose metabolism	XP_021850595.1|0.0e+00|probable alpha,alpha-trehalose-phosphate synthase [UDP-forming] 10 [Spinacia oleracea]	GO:0046351//disaccharide biosynthetic process;GO:0005975//carbohydrate metabolic process;GO:0009311//oligosaccharide metabolic process;GO:0044249//cellular biosynthetic process;GO:0034637//cellular carbohydrate biosynthetic process;GO:0016051//carbohydrate biosynthetic process;GO:1901576//organic substance biosynthetic process;GO:0071704//organic substance metabolic process;GO:0005992//trehalose …
LOC110686692	BGI_novel_T007044,XM_021863297.1	23.776	16.523	18.18	13.24	0.532753	0.000663174	1.38634e-05	0.424767	0.0781346	0.00651279	1.07296	5.76691e-09	2.87344e-10	NA	K04733//interleukin-1 receptor-associated kinase 4 [EC:2.7.11.1];K03145//transcription elongation factor S-II;K04733//interleukin-1 receptor-associated kinase 4 [EC:2.7.11.1];K03145//transcription elongation factor S-II	XP_021718989.1|0.0e+00|uncharacterized protein LOC110686692 [Chenopodium quinoa]	NA
LOC110686704	XM_021863308.1	18.43	7.956	8.586	6.956	0.382362	0.509532	0.142325	0.309075	0.774141	0.30505	1.61291	1.19587e-08	6.21653e-10	NA	K21989//calcium permeable stress-gated cation channel	XP_021719000.1|0.0e+00|calmodulin-binding protein 60 A-like [Chenopodium quinoa]	GO:0005488//binding;GO:0005516//calmodulin binding;GO:0005515//protein binding;
LOC110686705	XM_021863309.1	9.436	6.76	8.556	4.526	0.962732	0.055069	0.00372248	0.650026	0.471976	0.102014	1.26572	1.26477e-05	1.12623e-06	NA	NA	XP_021719001.1|7.0e-123|uncharacterized protein At5g50100, mitochondrial-like [Chenopodium quinoa]	NA
LOC110686708	XM_021863312.1,XM_021863313.1	2.543	1.313	1.67	1.21	0.507565	0.414455	0.096298	0.201942	0.919583	0.580255	1.26648	0.000162812	1.86889e-05	NA	NA	XP_021719004.1|1.6e-124|F-box protein CPR30-like isoform X1 [Chenopodium quinoa]	NA
LOC110686771	BGI_novel_T007043,XM_021863375.1,BGI_novel_T007042	2.21	0.93	1.463	1.113	0.447377	0.630453	0.224764	-0.140081	0.929881	0.719345	1.17427	0.0032783	0.000551846	NA	K11338//RuvB-like protein 2 [EC:3.6.4.12];K12614//ATP-dependent RNA helicase DDX6/DHH1 [EC:3.6.4.13]+ko03018//RNA degradation;K08669//HtrA serine peptidase 2 [EC:3.4.21.108];K11338//RuvB-like protein 2 [EC:3.6.4.12];K12614//ATP-dependent RNA helicase DDX6/DHH1 [EC:3.6.4.13]+ko03018//RNA degradation;K08669//HtrA serine peptidase 2 [EC:3.4.21.108];K11338//RuvB-like protein 2 [EC:3.6.4.12];K12614//A…	XP_021719067.1|2.2e-263|protease Do-like 9 [Chenopodium quinoa]	GO:0008236//serine-type peptidase activity;GO:0016787//hydrolase activity;GO:0140096//catalytic activity, acting on a protein;GO:0008233//peptidase activity;GO:0003824//catalytic activity;GO:0004252//serine-type endopeptidase activity;GO:0017171//serine hydrolase activity;GO:0016825//hydrolase activity, acting on acid phosphorus-nitrogen bonds;GO:0070011//peptidase activity, acting on L-amino aci…
LOC110686774	XM_021863377.1	0.183	0.036	0.043	0.04	0.116156	0.964673	0.866765	-0.0486048	0.996484	0.9464	1.9928	0.0195516	0.00438936	NA	K05666//ATP-binding cassette, subfamily C (CFTR/MRP), member 2+ko02010//ABC transporters	XP_021719069.1|0.0e+00|ABC transporter C family member 3-like [Chenopodium quinoa]	GO:0031224//intrinsic component of membrane;GO:0016021//integral component of membrane;GO:0110165//cellular anatomical entity;GO:0016020//membrane;GO:0017076//purine nucleotide binding;GO:0097367//carbohydrate derivative binding;GO:0000166//nucleotide binding;GO:0043167//ion binding;GO:1901265//nucleoside phosphate binding;GO:0016817//hydrolase activity, acting on acid anhydrides;GO:0022857//tran…
LOC110686869	XM_021863488.1,XM_021863479.1	2.15	1.17	1.62	1.113	0.61337	0.25262	0.0392462	0.182205	0.914528	0.53045	1.16065	0.000177148	2.05842e-05	NA	K12489//Arf-GAP with coiled-coil, ANK repeat and PH domain-containing protein+ko04144//Endocytosis;K12489//Arf-GAP with coiled-coil, ANK repeat and PH domain-containing protein+ko04144//Endocytosis	XP_021719171.1|0.0e+00|ADP-ribosylation factor GTPase-activating protein AGD3-like [Chenopodium quinoa]	GO:0110165//cellular anatomical entity;GO:0005622//intracellular;GO:0005737//cytoplasm;GO:0030695//GTPase regulator activity;GO:0005488//binding;GO:0030234//enzyme regulator activity;GO:0005096//GTPase activator activity;GO:0060589//nucleoside-triphosphatase regulator activity;GO:0043169//cation binding;GO:0008047//enzyme activator activity;GO:0043167//ion binding;GO:0098772//molecular function r…
LOC110686888	XM_021863500.1	6.07	0.286	0.086	0.09	0.00849296	0.999966	0.990095	0.740208	0.774141	0.30491	5.60913	4.34488e-19	7.62293e-21	NA	NA	XP_021719192.1|8.3e-175|EID1-like F-box protein 3 [Chenopodium quinoa]	NA
LOC110686899	XM_021863511.1,XM_021863508.1,XM_021863510.1,XM_021863507.1,BGI_novel_T007081,XM_021863509.1	1.456	1.296	0.92	0.816	0.280358	0.67763	0.267042	0.789913	0.0070174	0.000307311	1.08503	1.76866e-06	1.31333e-07	NA	K00012//UDPglucose 6-dehydrogenase [EC:1.1.1.22]+ko00520//Amino sugar and nucleotide sugar metabolism+ko00040//Pentose and glucuronate interconversions+ko01100//Metabolic pathways+ko00053//Ascorbate and aldarate metabolism;K00012//UDPglucose 6-dehydrogenase [EC:1.1.1.22]+ko00520//Amino sugar and nucleotide sugar metabolism+ko00040//Pentose and glucuronate interconversions+ko01100//Metabolic pathw…	XP_021719199.1|1.3e-259|UDP-glucose 6-dehydrogenase 3-like [Chenopodium quinoa]	NA
LOC110686911	XM_021863525.1,XM_021863526.1,BGI_novel_T007085	9.846	6.636	6.393	4.836	0.481115	0.348732	0.0695184	0.555156	0.202113	0.0256975	1.239	3.14629e-06	2.45707e-07	NA	K04733//interleukin-1 receptor-associated kinase 4 [EC:2.7.11.1];K04733//interleukin-1 receptor-associated kinase 4 [EC:2.7.11.1];K04733//interleukin-1 receptor-associated kinase 4 [EC:2.7.11.1]	XP_021719217.1|5.7e-218|cold-responsive protein kinase 1-like [Chenopodium quinoa]	NA
LOC110687064	XM_021863692.1	7.696	1.6	1.8	1.09	0.745309	0.284981	0.0486782	0.595502	0.694801	0.232478	2.98789	1.69795e-24	2.00686e-26	AP2-EREBP	K09286//EREBP-like factor	XP_021719384.1|1.5e-236|ethylene-responsive transcription factor ERF054-like [Chenopodium quinoa]	GO:0005622//intracellular;GO:0043227//membrane-bounded organelle;GO:0110165//cellular anatomical entity;GO:0043226//organelle;GO:0043231//intracellular membrane-bounded organelle;GO:0043229//intracellular organelle;GO:0005634//nucleus;GO:0140110//transcription regulator activity;GO:0097159//organic cyclic compound binding;GO:0003677//DNA binding;GO:0003700//DNA-binding transcription factor activi…
LOC110687068	XM_021863695.1	0.9	0.353	0.983	0.176	1.7951	0.0750331	0.00582397	0.782457	0.70907	0.245951	2.24456	0.00543046	0.000986525	MYB	K09422//transcription factor MYB, plant	XP_021719387.1|4.7e-171|transcription factor MYB41-like [Chenopodium quinoa]	NA
LOC110687082	XM_021863709.1	0.62	0.046	0.1	0	1.19284	0.365079	0.0760479	0.284604	0.899635	0.49774	3.99661	0.000163999	1.88536e-05	NA	K08486//syntaxin 1B/2/3+ko04130//SNARE interactions in vesicular transport	XP_021719401.1|2.0e-167|syntaxin-125-like [Chenopodium quinoa]	GO:0006886//intracellular protein transport;GO:0046907//intracellular transport;GO:0015031//protein transport;GO:0051179//localization;GO:0051649//establishment of localization in cell;GO:0015833//peptide transport;GO:0071705//nitrogen compound transport;GO:0045184//establishment of protein localization;GO:0006810//transport;GO:0051641//cellular localization;GO:0071702//organic substance transpor…
LOC110687152	XM_021863769.1	1.093	0.363	0.33	0.256	0.390358	0.791903	0.402742	0.527749	0.767336	0.298417	2.18941	9.74065e-06	8.46875e-07	NA	K00924//kinase [EC:2.7.1.-]	XP_021719461.1|0.0e+00|receptor protein kinase CLAVATA1-like [Chenopodium quinoa]	GO:0003824//catalytic activity;
LOC110687176	XM_021863789.1	15.673	3.89	3.046	1.293	0.970384	0.486611	0.130799	1.26575	0.307098	0.0487269	3.40392	1.19584e-06	8.57634e-08	NA	K04733//interleukin-1 receptor-associated kinase 4 [EC:2.7.11.1]	XP_021719481.1|1.0e-156|putative cysteine-rich repeat secretory protein 5 [Chenopodium quinoa]	NA
LOC110687210	XM_021863824.1	4.63	1.006	1.383	0.416	1.24028	0.331528	0.0636317	0.880589	0.671898	0.215215	3.3551	1.84864e-07	1.17066e-08	NA	K16223//protein FLOWERING LOCUS T+ko04712//Circadian rhythm - plant	XP_021719516.1|4.2e-101|protein MOTHER of FT and TFL1-like [Chenopodium quinoa]	NA
LOC110687228	XM_021863846.1	1.006	0.59	0.753	0.546	0.524095	0.417107	0.0977671	0.199071	0.919583	0.616935	1.07743	0.00277608	0.000456007	NA	K04733//interleukin-1 receptor-associated kinase 4 [EC:2.7.11.1]	XP_021719538.1|0.0e+00|G-type lectin S-receptor-like serine/threonine-protein kinase At1g11330 [Chenopodium quinoa]	NA
LOC110687233	XM_021863848.1	2.433	2.71	2.313	1.116	0.991582	0.254913	0.0402931	1.22496	0.109243	0.0103789	1.27423	0.0306027	0.00748226	NA	K04733//interleukin-1 receptor-associated kinase 4 [EC:2.7.11.1]	XP_021719540.1|0.0e+00|G-type lectin S-receptor-like serine/threonine-protein kinase B120 [Chenopodium quinoa]	GO:0008037//cell recognition;GO:0022414//reproductive process;GO:0051704//multi-organism process;GO:0009875//pollen-pistil interaction;GO:0032501//multicellular organismal process;GO:0009987//cellular process;GO:0048544//recognition of pollen;GO:0044706//multi-multicellular organism process;GO:0007154//cell communication;GO:0000003//reproduction;GO:0009856//pollination;GO:0110165//cellular anatom…
LOC110687265	XM_021863894.1	16.353	8.636	13.273	7.593	0.849888	0.0620935	0.00438816	0.29426	0.796765	0.329857	1.31021	4.55135e-05	4.57804e-06	NA	K01176//alpha-amylase [EC:3.2.1.1]+ko01100//Metabolic pathways+ko00500//Starch and sucrose metabolism	XP_021719586.1|2.5e-261|alpha-amylase-like [Chenopodium quinoa]	GO:0071704//organic substance metabolic process;GO:0008152//metabolic process;GO:0044238//primary metabolic process;GO:0005975//carbohydrate metabolic process;GO:0016787//hydrolase activity;GO:0005488//binding;GO:0005509//calcium ion binding;GO:0043169//cation binding;GO:0046872//metal ion binding;GO:0004556//alpha-amylase activity;GO:0004553//hydrolase activity, hydrolyzing O-glycosyl compounds;…
LOC110687278	XM_021863906.1,BGI_novel_T007129	2.836	2.15	1.913	1.483	0.423438	0.718801	0.307498	0.605864	0.532202	0.129294	1.13316	0.0212632	0.00486032	bHLH	NA	XP_021719598.1|6.1e-137|transcription factor ILR3-like [Chenopodium quinoa]	GO:0005515//protein binding;GO:0046983//protein dimerization activity;GO:0005488//binding;
LOC110687279	XM_021863908.1,XM_021863909.1,BGI_novel_T007131	5.686	1.88	4.483	2.416	0.885646	0.176231	0.0217083	-0.210765	0.919583	0.632738	1.45614	0.000181193	2.10935e-05	NA	K04733//interleukin-1 receptor-associated kinase 4 [EC:2.7.11.1];K04733//interleukin-1 receptor-associated kinase 4 [EC:2.7.11.1];K04733//interleukin-1 receptor-associated kinase 4 [EC:2.7.11.1]	XP_021719601.1|0.0e+00|cysteine-rich receptor-like protein kinase 6 isoform X2 [Chenopodium quinoa]	NA
LOC110687282	XM_021863915.1,BGI_novel_T007136	11.933	2.893	5.363	3.27	0.671685	0.62638	0.221572	-0.0562215	0.983982	0.904566	1.97301	0.000131948	1.48371e-05	NA	K04733//interleukin-1 receptor-associated kinase 4 [EC:2.7.11.1];K04733//interleukin-1 receptor-associated kinase 4 [EC:2.7.11.1]	XP_021719607.1|0.0e+00|putative receptor-like protein kinase At4g00960 [Chenopodium quinoa]	NA
LOC110687297	XM_021863928.1,BGI_novel_T007142,XM_021863927.1	8.17	2.623	4.563	1.956	1.12655	0.139691	0.0148628	0.48659	0.7149	0.250751	2.19816	4.44798e-07	2.98937e-08	NA	K04733//interleukin-1 receptor-associated kinase 4 [EC:2.7.11.1];K04733//interleukin-1 receptor-associated kinase 4 [EC:2.7.11.1];K04733//interleukin-1 receptor-associated kinase 4 [EC:2.7.11.1]	XP_021719619.1|0.0e+00|cysteine-rich receptor-like protein kinase 25 isoform X1 [Chenopodium quinoa]	NA
LOC110687299	BGI_novel_T007143,XM_021863931.1,XM_021863932.1	3.46	1.173	1.02	1.21	0.115807	0.956593	0.847597	0.358981	0.899618	0.497333	2.16314	3.1709e-06	2.47904e-07	NA	K04733//interleukin-1 receptor-associated kinase 4 [EC:2.7.11.1];K04733//interleukin-1 receptor-associated kinase 4 [EC:2.7.11.1];K04733//interleukin-1 receptor-associated kinase 4 [EC:2.7.11.1]	XP_021719623.1|0.0e+00|cysteine-rich receptor-like protein kinase 5 isoform X1 [Chenopodium quinoa]	GO:0110165//cellular anatomical entity;GO:0016021//integral component of membrane;GO:0031224//intrinsic component of membrane;GO:0016020//membrane;GO:0043168//anion binding;GO:0032553//ribonucleotide binding;GO:0030554//adenyl nucleotide binding;GO:0016301//kinase activity;GO:0032555//purine ribonucleotide binding;GO:0017076//purine nucleotide binding;GO:1901265//nucleoside phosphate binding;GO:0…
LOC110687300	XM_021863933.1	10.973	6.093	5.386	3.63	0.599	0.530336	0.155211	0.826771	0.0916713	0.00807689	1.78736	2.79591e-13	8.4403e-15	NA	K04733//interleukin-1 receptor-associated kinase 4 [EC:2.7.11.1]	XP_021719625.1|0.0e+00|cysteine-rich receptor-like protein kinase 25 [Chenopodium quinoa]	GO:0044237//cellular metabolic process;GO:0043207//response to external biotic stimulus;GO:0009607//response to biotic stimulus;GO:0044260//cellular macromolecule metabolic process;GO:0043412//macromolecule modification;GO:0006952//defense response;GO:0009987//cellular process;GO:1901564//organonitrogen compound metabolic process;GO:0098542//defense response to other organism;GO:0043170//macromol…
LOC110687304	XM_021863937.1	12.306	3.813	5.803	3.283	0.832514	0.157991	0.0181135	0.31331	0.865899	0.438835	2.10616	1.10703e-20	1.68296e-22	NA	K04733//interleukin-1 receptor-associated kinase 4 [EC:2.7.11.1]	XP_021719629.1|0.0e+00|putative receptor-like protein kinase At4g00960 [Chenopodium quinoa]	NA
LOC110687309	XM_021863942.1	1.236	0.266	0.35	0.093	1.15404	0.424718	0.101229	1.23008	0.3068	0.0486656	3.61265	5.61995e-10	2.43514e-11	NA	K04733//interleukin-1 receptor-associated kinase 4 [EC:2.7.11.1]	XP_021719634.1|0.0e+00|cysteine-rich receptor-like protein kinase 15 [Chenopodium quinoa]	NA
LOC110687318	XM_021863951.1,BGI_novel_T007153	30.49	7.086	8.406	6.27	0.484175	0.599184	0.200432	0.259977	0.796387	0.329291	2.41464	3.74174e-21	5.53418e-23	NA	K15503//serine/threonine-protein phosphatase 6 regulatory ankyrin repeat subunit B;K09420//transcriptional activator Myb;K15503//serine/threonine-protein phosphatase 6 regulatory ankyrin repeat subunit B;K09420//transcriptional activator Myb	XP_021719643.1|0.0e+00|ankyrin repeat-containing protein ITN1-like [Chenopodium quinoa]	GO:0016021//integral component of membrane;GO:0031224//intrinsic component of membrane;GO:0110165//cellular anatomical entity;GO:0016020//membrane;
LOC110687320	XM_021863952.1,BGI_novel_T007155,BGI_novel_T007156	5.476	2.05	1.893	1.743	0.356037	0.507626	0.141139	0.429106	0.500561	0.114424	2.07339	7.45346e-30	6.56265e-32	NA	K15503//serine/threonine-protein phosphatase 6 regulatory ankyrin repeat subunit B;K09420//transcriptional activator Myb;K15503//serine/threonine-protein phosphatase 6 regulatory ankyrin repeat subunit B;K15503//serine/threonine-protein phosphatase 6 regulatory ankyrin repeat subunit B	XP_021719644.1|0.0e+00|ankyrin repeat-containing protein ITN1-like [Chenopodium quinoa]	GO:0016021//integral component of membrane;GO:0031224//intrinsic component of membrane;GO:0110165//cellular anatomical entity;GO:0016020//membrane;
LOC110687327	XM_021863963.1	21.763	11.096	12.933	11.403	0.268955	0.791328	0.400857	0.0750461	0.943235	0.759963	1.13801	0.00173404	0.000266513	NA	K19613//leucine-rich repeat protein SHOC2;K03188//urease accessory protein	XP_021719655.1|5.8e-104|protein PHLOEM PROTEIN 2-LIKE A1-like [Chenopodium quinoa]	NA
LOC110687336	XM_021863972.1,XM_021863971.1	5.373	1.36	1.77	1.11	0.702677	0.341822	0.0671796	0.362668	0.871981	0.451866	2.25674	0.000464403	6.01667e-05	NA	K05350//beta-glucosidase [EC:3.2.1.21]+ko01100//Metabolic pathways+ko00500//Starch and sucrose metabolism+ko01110//Biosynthesis of secondary metabolites+ko00460//Cyanoamino acid metabolism+ko00940//Phenylpropanoid biosynthesis;K05350//beta-glucosidase [EC:3.2.1.21]+ko01100//Metabolic pathways+ko00500//Starch and sucrose metabolism+ko01110//Biosynthesis of secondary metabolites+ko00460//Cyanoamino…	XP_021867449.1|4.2e-270|beta-glucosidase 46-like [Spinacia oleracea]	GO:0008152//metabolic process;GO:0044238//primary metabolic process;GO:0071704//organic substance metabolic process;GO:0005975//carbohydrate metabolic process;GO:0003824//catalytic activity;GO:0016787//hydrolase activity;GO:0016798//hydrolase activity, acting on glycosyl bonds;GO:0004553//hydrolase activity, hydrolyzing O-glycosyl compounds;
LOC110687341	XM_021863982.1	3.946	2.946	2.6	1.99	0.463776	0.253974	0.0399529	0.659656	0.100081	0.00913797	1.20733	9.85442e-08	5.93902e-09	NA	K16815//calcium-independent phospholipase A2-gamma	XP_021719674.1|0.0e+00|phospholipase A I-like [Chenopodium quinoa]	GO:0044238//primary metabolic process;GO:0071704//organic substance metabolic process;GO:1901575//organic substance catabolic process;GO:0009056//catabolic process;GO:0008152//metabolic process;GO:0016042//lipid catabolic process;GO:0006629//lipid metabolic process;GO:0016787//hydrolase activity;GO:0003824//catalytic activity;
LOC110687368	XM_021864012.1,BGI_novel_T007167,XM_021864013.1	21.63	14.513	14.523	11.16	0.424986	0.113879	0.0107809	0.452847	0.170748	0.0198394	1.12982	4.66487e-11	1.76737e-12	NA	K13412//calcium-dependent protein kinase [EC:2.7.11.1]+ko04626//Plant-pathogen interaction;K13412//calcium-dependent protein kinase [EC:2.7.11.1]+ko04626//Plant-pathogen interaction;K13412//calcium-dependent protein kinase [EC:2.7.11.1]+ko04626//Plant-pathogen interaction	KNA20599.1|1.6e-250|hypothetical protein SOVF_050880 [Spinacia oleracea]	GO:0036094//small molecule binding;GO:0043169//cation binding;GO:0043168//anion binding;GO:0097159//organic cyclic compound binding;GO:0032555//purine ribonucleotide binding;GO:0016301//kinase activity;GO:0005509//calcium ion binding;GO:0005488//binding;GO:0004672//protein kinase activity;GO:0140096//catalytic activity, acting on a protein;GO:0043167//ion binding;GO:0000166//nucleotide binding;GO…
LOC110687397	XM_021864043.1	10.476	8.753	7.123	5.506	0.443875	0.3515	0.0705069	0.759258	0.0695368	0.00553717	1.10488	0.010879	0.00221515	NA	K09775//uncharacterized protein;K07466//replication factor A1+ko03420//Nucleotide excision repair+ko03030//DNA replication+ko03440//Homologous recombination+ko03430//Mismatch repair	XP_021719735.1|3.1e-216|uncharacterized protein LOC110687397 [Chenopodium quinoa]	GO:0110165//cellular anatomical entity;GO:0016020//membrane;
LOC110687417	XM_021864065.1	173.86	97.47	99.633	98.153	0.127557	0.898091	0.683428	0.112584	0.919583	0.607914	1.04553	0.000457582	5.91043e-05	NA	K05933//aminocyclopropanecarboxylate oxidase [EC:1.14.17.4]+ko01100//Metabolic pathways+ko01110//Biosynthesis of secondary metabolites+ko00270//Cysteine and methionine metabolism	XP_021719757.1|1.2e-183|1-aminocyclopropane-1-carboxylate oxidase-like [Chenopodium quinoa]	GO:0046872//metal ion binding;GO:0043167//ion binding;GO:0043169//cation binding;GO:0003824//catalytic activity;GO:0005488//binding;GO:0016491//oxidoreductase activity;
LOC110687421	XM_021864069.1,XM_021864068.1	3.43	2.406	3.043	1.786	0.788102	0.203881	0.0274256	0.496147	0.674391	0.216903	1.11673	0.0144326	0.00308019	NA	K18045//tyrosine-protein phosphatase SIW14 [EC:3.1.3.48];K18045//tyrosine-protein phosphatase SIW14 [EC:3.1.3.48]	XP_021719760.1|9.4e-104|probable tyrosine-protein phosphatase At1g05000 isoform X1 [Chenopodium quinoa]	NA
LOC110687438	XM_021864086.1,BGI_novel_T007179,XM_021864088.1,BGI_novel_T007178,XM_021864087.1	3.32	2.45	2.453	1.36	0.923163	0.126908	0.0127891	0.964137	0.0261534	0.00154174	1.55502	4.7229e-05	4.77094e-06	NA	K01555//fumarylacetoacetase [EC:3.7.1.2]+ko00350//Tyrosine metabolism+ko01100//Metabolic pathways;K01555//fumarylacetoacetase [EC:3.7.1.2]+ko00350//Tyrosine metabolism+ko01100//Metabolic pathways;K01555//fumarylacetoacetase [EC:3.7.1.2]+ko00350//Tyrosine metabolism+ko01100//Metabolic pathways;K01555//fumarylacetoacetase [EC:3.7.1.2]+ko00350//Tyrosine metabolism+ko01100//Metabolic pathways;K01555/…	XP_021719780.1|7.5e-240|fumarylacetoacetase-like isoform X3 [Chenopodium quinoa]	GO:0044238//primary metabolic process;GO:0009072//aromatic amino acid family metabolic process;GO:0006558//L-phenylalanine metabolic process;GO:1901575//organic substance catabolic process;GO:0019439//aromatic compound catabolic process;GO:1901606//alpha-amino acid catabolic process;GO:0044282//small molecule catabolic process;GO:0019752//carboxylic acid metabolic process;GO:0006082//organic acid…
LOC110687453	XM_021864106.1	149.916	118.663	141.11	86.26	0.757298	0.0206792	0.000985392	0.566486	0.1099	0.0104654	1.00093	0.000392735	4.99088e-05	NA	K13899//cystatin-C	XP_021719798.1|1.1e-58|cysteine proteinase inhibitor 1-like [Chenopodium quinoa]	GO:0004857//enzyme inhibitor activity;GO:0061135//endopeptidase regulator activity;GO:0004869//cysteine-type endopeptidase inhibitor activity;GO:0061134//peptidase regulator activity;GO:0030234//enzyme regulator activity;GO:0004866//endopeptidase inhibitor activity;GO:0098772//molecular function regulator;GO:0030414//peptidase inhibitor activity;
LOC110687504	BGI_novel_T007189,XM_021864159.1	18.323	10.86	14.173	9.066	0.701156	0.207772	0.0283195	0.351297	0.804561	0.340919	1.2232	0.0001814	2.11255e-05	NA	K12486//stromal membrane-associated protein+ko04144//Endocytosis;K12486//stromal membrane-associated protein+ko04144//Endocytosis	XP_021766732.1|4.5e-99|protein C2-DOMAIN ABA-RELATED 11-like isoform X1 [Chenopodium quinoa]	NA
LOC110687512	XM_021864171.1	13.843	6.553	7.93	5.493	0.602914	0.065948	0.00479139	0.364569	0.144204	0.015359	1.55111	6.41804e-20	1.05086e-21	NA	K13457//disease resistance protein RPM1+ko04626//Plant-pathogen interaction	XP_021719863.1|0.0e+00|disease resistance RPP13-like protein 4 [Chenopodium quinoa]	GO:0050896//response to stimulus;GO:0006950//response to stress;GO:0006952//defense response;GO:0043531//ADP binding;GO:0017076//purine nucleotide binding;GO:0032553//ribonucleotide binding;GO:0032555//purine ribonucleotide binding;GO:0097367//carbohydrate derivative binding;GO:0030554//adenyl nucleotide binding;GO:0000166//nucleotide binding;GO:0005524//ATP binding;GO:0032559//adenyl ribonucleot…
LOC110687541	BGI_novel_T007182,BGI_novel_T007181,XM_021864200.1	33.933	20.523	13.073	10.476	0.365571	0.586244	0.191463	0.999514	0.00196496	6.75374e-05	1.82338	1.32133e-10	5.29554e-12	NA	K17275//plastin-1;K17275//plastin-1;K17275//plastin-1	XP_021719890.1|1.2e-76|acyl-CoA--sterol O-acyltransferase 1-like [Chenopodium quinoa]	GO:0016020//membrane;GO:0031224//intrinsic component of membrane;GO:0016021//integral component of membrane;GO:0110165//cellular anatomical entity;GO:0008374//O-acyltransferase activity;GO:0016740//transferase activity;GO:0016747//transferase activity, transferring acyl groups other than amino-acyl groups;GO:0016746//transferase activity, transferring acyl groups;GO:0003824//catalytic activity;
LOC110687627	XM_021864265.1	1.806	0.31	0.603	0.426	0.484514	0.784527	0.385021	-0.248769	0.919583	0.690073	2.15094	0.000154226	1.7613e-05	NA	K11267//sister chromatid cohesion protein PDS5;K17046//protein DEK	XP_021719957.1|1.8e-163|acidic leucine-rich nuclear phosphoprotein 32 family member A-like [Chenopodium quinoa]	NA
LOC110687756	XM_021864385.1	0.72	0.296	0.196	0.2	0.0137655	0.999966	0.983323	0.49621	0.866288	0.439829	1.78943	0.0331987	0.00825161	NA	K01193//beta-fructofuranosidase [EC:3.2.1.26]+ko01100//Metabolic pathways+ko00052//Galactose metabolism+ko00500//Starch and sucrose metabolism	XP_021720077.1|9.8e-285|UPF0481 protein At3g47200-like [Chenopodium quinoa]	GO:0110165//cellular anatomical entity;GO:0016021//integral component of membrane;GO:0016020//membrane;GO:0031224//intrinsic component of membrane;
LOC110687760	XM_021864389.1,XM_021864388.1,XM_021864390.1	43.38	28.126	24.386	18.713	0.46038	0.0456058	0.00280564	0.698448	0.00099401	2.98101e-05	1.43127	1.99245e-17	4.07469e-19	NA	K22651//E3 ubiquitin-protein ligase RNF4 [EC:2.3.2.27];K22651//E3 ubiquitin-protein ligase RNF4 [EC:2.3.2.27];K22651//E3 ubiquitin-protein ligase RNF4 [EC:2.3.2.27]	NA	NA
LOC110687766	XM_021864399.1,XM_021864400.1	2.023	0.5	0.863	0.37	0.966492	0.457461	0.117179	0.422798	0.876049	0.458958	2.4561	3.14334e-06	2.45408e-07	AP2-EREBP	NA	XP_021720091.1|2.9e-134|ethylene-responsive transcription factor-like protein At4g13040 [Chenopodium quinoa]	GO:0005634//nucleus;GO:0043226//organelle;GO:0005622//intracellular;GO:0043229//intracellular organelle;GO:0043227//membrane-bounded organelle;GO:0043231//intracellular membrane-bounded organelle;GO:0110165//cellular anatomical entity;GO:0005488//binding;GO:0003677//DNA binding;GO:0097159//organic cyclic compound binding;GO:1901363//heterocyclic compound binding;GO:0003676//nucleic acid binding;G…
LOC110687775	XM_021864409.1	0.233	0.06	0.126	0.026	1.37755	0.276939	0.0462481	0.55147	0.870359	0.448727	2.59871	0.00553712	0.00100941	NA	K10949//ER lumen protein retaining receptor	XP_021720101.1|5.7e-159|ER lumen protein-retaining receptor-like [Chenopodium quinoa]	GO:0008104//protein localization;GO:0070727//cellular macromolecule localization;GO:0035437//maintenance of protein localization in endoplasmic reticulum;GO:0051641//cellular localization;GO:0065008//regulation of biological quality;GO:0033365//protein localization to organelle;GO:0045185//maintenance of protein location;GO:0033036//macromolecule localization;GO:0070972//protein localization to e…
LOC110687794	XM_021864435.1	27.256	21.143	25.12	13.893	0.922948	0.000279057	4.99413e-06	0.706356	0.0438856	0.0030014	1.18646	7.69741e-07	5.34684e-08	NA	K00224//chloroplastic oxoene reductase [EC:1.3.1.-]+ko00592//alpha-Linolenic acid metabolism+ko01110//Biosynthesis of secondary metabolites	XP_021720127.1|1.1e-184|quinone-oxidoreductase homolog, chloroplastic-like [Chenopodium quinoa]	GO:0009507//chloroplast;GO:0042170//plastid membrane;GO:0005622//intracellular;GO:0016020//membrane;GO:0110165//cellular anatomical entity;GO:0019866//organelle inner membrane;GO:0043229//intracellular organelle;GO:0009706//chloroplast inner membrane;GO:0031969//chloroplast membrane;GO:0005737//cytoplasm;GO:0043226//organelle;GO:0031090//organelle membrane;GO:0009941//chloroplast envelope;GO:0009…
LOC110687806	XM_021864450.1,XM_021864449.1	781.836	448.156	716.273	394.23	0.889761	0.0776393	0.00614853	0.294038	0.831693	0.377605	1.18012	0.010226	0.00205636	NA	NA	XP_021720141.1|1.1e-106|jasmonate-induced protein homolog [Chenopodium quinoa]	NA
LOC110687811	XM_021864455.1	6.996	3.166	2.196	1.876	0.311745	0.826463	0.451157	0.792071	0.371047	0.0668196	2.03481	6.97262e-06	5.85349e-07	NA	NA	XP_021749869.1|4.3e-187|uncharacterized protein LOC110715588 [Chenopodium quinoa]	NA
LOC110687825	XM_021864500.1	0.4	0.073	0.14	0.04	1.10946	0.450943	0.114046	0.433364	0.919583	0.551743	3.00186	0.000134242	1.51153e-05	NA	K04730//interleukin-1 receptor-associated kinase 1 [EC:2.7.11.1]	XP_021720192.1|0.0e+00|probable LRR receptor-like serine/threonine-protein kinase At3g47570 [Chenopodium quinoa]	NA
LOC110687828	XM_021864472.1	10.613	6.316	6.67	5.336	0.3962	0.514297	0.146128	0.344176	0.641796	0.192437	1.19384	0.000106726	1.17023e-05	NA	K03517//quinolinate synthase [EC:2.5.1.72]+ko01100//Metabolic pathways+ko00760//Nicotinate and nicotinamide metabolism	XP_021720164.1|0.0e+00|quinolinate synthase, chloroplastic-like [Chenopodium quinoa]	GO:0048518//positive regulation of biological process;GO:0009165//nucleotide biosynthetic process;GO:0019363//pyridine nucleotide biosynthetic process;GO:0044281//small molecule metabolic process;GO:0019637//organophosphate metabolic process;GO:0042762//regulation of sulfur metabolic process;GO:0019222//regulation of metabolic process;GO:1901360//organic cyclic compound metabolic process;GO:00442…
LOC110687861	XM_021864505.1	71.33	22.91	36.876	10.08	1.58061	0.0582187	0.00400773	1.13413	0.151663	0.0165919	2.85642	1.00388e-08	5.17058e-10	NA	K04733//interleukin-1 receptor-associated kinase 4 [EC:2.7.11.1]	XP_021720197.1|0.0e+00|leucine-rich repeat receptor-like serine/threonine/tyrosine-protein kinase SOBIR1 [Chenopodium quinoa]	GO:0016021//integral component of membrane;GO:0016020//membrane;GO:0031224//intrinsic component of membrane;GO:0110165//cellular anatomical entity;GO:0097159//organic cyclic compound binding;GO:1901265//nucleoside phosphate binding;GO:0016301//kinase activity;GO:0000166//nucleotide binding;GO:0140096//catalytic activity, acting on a protein;GO:0005524//ATP binding;GO:0004672//protein kinase activ…
LOC110687870	XM_021864512.1	73.426	28.15	21.653	29.223	-0.274123	0.888034	0.547336	0.0738374	0.970957	0.864552	1.50395	0.00262648	0.000427768	TAZ	K10523//speckle-type POZ protein;K02987//small subunit ribosomal protein S4e+ko03010//Ribosome;K04498//E1A/CREB-binding protein [EC:2.3.1.48]	XP_021720204.1|2.6e-211|BTB/POZ and TAZ domain-containing protein 1-like [Chenopodium quinoa]	GO:0050789//regulation of biological process;GO:1903506//regulation of nucleic acid-templated transcription;GO:2001141//regulation of RNA biosynthetic process;GO:0060255//regulation of macromolecule metabolic process;GO:0031323//regulation of cellular metabolic process;GO:0019222//regulation of metabolic process;GO:0031326//regulation of cellular biosynthetic process;GO:0080090//regulation of pri…
LOC110687878	XM_021864520.1	75.06	33.266	32.28	19.773	0.789187	5.18309e-06	4.82437e-08	0.855188	0.000201599	4.72541e-06	2.13442	3.3668e-23	4.3152e-25	NA	K16865//programmed cell death protein 4	XP_021720212.1|0.0e+00|uncharacterized protein LOC110687878 [Chenopodium quinoa]	GO:0051171//regulation of nitrogen compound metabolic process;GO:0031324//negative regulation of cellular metabolic process;GO:0010558//negative regulation of macromolecule biosynthetic process;GO:0009890//negative regulation of biosynthetic process;GO:0010605//negative regulation of macromolecule metabolic process;GO:0009889//regulation of biosynthetic process;GO:0019219//regulation of nucleobas…
LOC110687938	XM_021864588.1	1.63	0.123	0.05	0.05	0.0215205	0.999966	0.975802	0.68581	0.80727	0.347443	4.44647	2.77119e-09	1.30954e-10	NA	NA	XP_021720280.1|5.6e-189|uncharacterized protein LOC110687938 [Chenopodium quinoa]	NA
LOC110688014	XM_021864717.1	0.326	0.016	0.033	0	0.412323	0.78997	0.392254	0.114652	0.919583	0.682868	3.34862	0.00297464	0.000493762	NA	K04730//interleukin-1 receptor-associated kinase 1 [EC:2.7.11.1]	XP_021720409.1|2.4e-245|probable LRR receptor-like serine/threonine-protein kinase At3g47570 [Chenopodium quinoa]	GO:0016021//integral component of membrane;GO:0016020//membrane;GO:0031224//intrinsic component of membrane;GO:0110165//cellular anatomical entity;GO:0032553//ribonucleotide binding;GO:0005488//binding;GO:0043167//ion binding;GO:0016772//transferase activity, transferring phosphorus-containing groups;GO:0043168//anion binding;GO:0035639//purine ribonucleoside triphosphate binding;GO:0032555//puri…
LOC110688016	XM_021864680.1	498.633	34.1	67.313	38.393	0.859117	0.137505	0.0144803	-0.0383177	0.988764	0.921173	3.82684	8.94942e-32	7.16171e-34	NA	K03860//phosphatidylinositol glycan, class Q+ko01100//Metabolic pathways+ko00563//Glycosylphosphatidylinositol (GPI)-anchor biosynthesis;K20887//xyloglucan glycosyltransferase 4 [EC:2.4.1.-]	XP_021720372.1|7.3e-58|peamaclein-like [Chenopodium quinoa]	NA
LOC110688024	XM_021864688.1	43.923	27.856	24.606	20.52	0.331756	0.254541	0.0401862	0.544516	0.0358339	0.00230981	1.31766	3.27889e-10	1.38662e-11	NA	K00814//alanine transaminase [EC:2.6.1.2]+ko00250//Alanine, aspartate and glutamate metabolism+ko00220//Arginine biosynthesis+ko01230//Biosynthesis of amino acids+ko01100//Metabolic pathways+ko00710//Carbon fixation in photosynthetic organisms+ko01210//2-Oxocarboxylic acid metabolism+ko01200//Carbon metabolism	XP_021761871.1|2.6e-300|alanine aminotransferase 2-like [Chenopodium quinoa]	GO:0009058//biosynthetic process;GO:0008152//metabolic process;GO:0043167//ion binding;GO:0036094//small molecule binding;GO:0070279//vitamin B6 binding;GO:0019842//vitamin binding;GO:0097159//organic cyclic compound binding;GO:0016740//transferase activity;GO:0003824//catalytic activity;GO:0030170//pyridoxal phosphate binding;GO:0008483//transaminase activity;GO:1901363//heterocyclic compound bi…
LOC110688071	XM_021864750.1	2.52	0.336	18.503	0.036	1.55335	0.185149	0.023473	1.76274	0.141574	0.014964	2.94908	0.0136711	0.00288982	NA	K15333//tRNA guanosine-2'-O-methyltransferase [EC:2.1.1.34];K12619//5'-3' exoribonuclease 2 [EC:3.1.13.-]+ko03018//RNA degradation+ko03008//Ribosome biogenesis in eukaryotes;K13199//plasminogen activator inhibitor 1 RNA-binding protein;K14568//rRNA small subunit pseudouridine methyltransferase Nep1 [EC:2.1.1.260]+ko03008//Ribosome biogenesis in eukaryotes	XP_021720442.1|0.0e+00|subtilisin-like protease SBT1.4 [Chenopodium quinoa]	GO:0017171//serine hydrolase activity;GO:0004175//endopeptidase activity;GO:0008236//serine-type peptidase activity;GO:0003824//catalytic activity;GO:0004252//serine-type endopeptidase activity;GO:0016787//hydrolase activity;GO:0016825//hydrolase activity, acting on acid phosphorus-nitrogen bonds;GO:0070011//peptidase activity, acting on L-amino acid peptides;GO:0140096//catalytic activity, actin…
LOC110688075	XM_021864755.1	31.473	24.466	27.626	17.476	0.732401	0.0018992	4.84374e-05	0.587753	0.0493722	0.00350426	1.07288	7.00546e-10	3.06738e-11	NA	K14085//aldehyde dehydrogenase family 7 member A1 [EC:1.2.1.31 1.2.1.8 1.2.1.3]+ko00410//beta-Alanine metabolism+ko00310//Lysine degradation+ko00010//Glycolysis / Gluconeogenesis+ko00380//Tryptophan metabolism+ko00330//Arginine and proline metabolism+ko00280//Valine, leucine and isoleucine degradation+ko01100//Metabolic pathways+ko00053//Ascorbate and aldarate metabolism+ko00340//Histidine metabo…	XP_021716541.1|1.2e-290|aldehyde dehydrogenase family 7 member B4 [Chenopodium quinoa]	GO:0003824//catalytic activity;GO:0016620//oxidoreductase activity, acting on the aldehyde or oxo group of donors, NAD or NADP as acceptor;GO:0016491//oxidoreductase activity;GO:0016903//oxidoreductase activity, acting on the aldehyde or oxo group of donors;
LOC110688076	XM_021864756.1,BGI_novel_T007288,BGI_novel_T007287	7.096	4.8	2.576	2.64	-0.138491	0.897239	0.565819	0.784657	0.0350507	0.00223899	1.07943	8.59688e-06	7.37552e-07	NA	K03452//magnesium/proton exchanger;K15271//ATP-dependent DNA helicase HFM1/MER3 [EC:3.6.4.12];K22733//magnesium transporter;K03798//cell division protease FtsH [EC:3.4.24.-];K19090//CRISPR-associated protein Cas5t	XP_021753609.1|1.8e-140|pentatricopeptide repeat-containing protein At3g26630, chloroplastic-like [Chenopodium quinoa]	NA
LOC110688083	XM_021864763.1	6.55	4.44	4.543	2.726	0.710061	0.516689	0.147444	0.740616	0.46371	0.0984857	1.4172	0.00943873	0.00187471	NA	K04733//interleukin-1 receptor-associated kinase 4 [EC:2.7.11.1]	XP_021720455.1|1.2e-248|serine/threonine-protein kinase RIPK-like [Chenopodium quinoa]	GO:0032555//purine ribonucleotide binding;GO:1901363//heterocyclic compound binding;GO:0005488//binding;GO:0000166//nucleotide binding;GO:0016772//transferase activity, transferring phosphorus-containing groups;GO:0035639//purine ribonucleoside triphosphate binding;GO:0097159//organic cyclic compound binding;GO:0032559//adenyl ribonucleotide binding;GO:0030554//adenyl nucleotide binding;GO:190126…
LOC110688086	XM_021864766.1	69.436	32.306	38.74	20.746	0.966482	6.55966e-05	9.16566e-07	0.73875	0.0328965	0.00206464	1.95195	1.55255e-23	1.93492e-25	NA	K00951//GTP pyrophosphokinase [EC:2.7.6.5]+ko00230//Purine metabolism	XP_021720458.1|0.0e+00|probable GTP diphosphokinase RSH2, chloroplastic [Chenopodium quinoa]	GO:0044281//small molecule metabolic process;GO:1901564//organonitrogen compound metabolic process;GO:0044238//primary metabolic process;GO:0006139//nucleobase-containing compound metabolic process;GO:0006807//nitrogen compound metabolic process;GO:0046128//purine ribonucleoside metabolic process;GO:0034032//purine nucleoside bisphosphate metabolic process;GO:0034641//cellular nitrogen compound m…
LOC110688091	XM_021864769.1	20.64	18.876	27.16	10.58	1.10024	0.337886	0.0655886	0.881772	0.241143	0.0333646	1.14664	0.0367821	0.00934249	NA	NA	XP_021720461.1|2.7e-134|transcription factor bHLH47-like [Chenopodium quinoa]	GO:0005488//binding;GO:0046983//protein dimerization activity;GO:0005515//protein binding;
LOC110688166	XM_021864874.1	4.993	3.83	4	2.213	0.870179	0.104122	0.00938512	0.849154	0.139718	0.0146516	1.36386	7.06712e-05	7.42254e-06	NA	K08332//vacuolar protein 8;K10260//F-box and WD-40 domain protein 7+ko04120//Ubiquitin mediated proteolysis	XP_021720566.1|2.5e-249|E3 ubiquitin-protein ligase PUB24-like [Chenopodium quinoa]	GO:0016740//transferase activity;GO:0140096//catalytic activity, acting on a protein;GO:0004842//ubiquitin-protein transferase activity;GO:0019787//ubiquitin-like protein transferase activity;GO:0003824//catalytic activity;
LOC110688190	XM_021864901.1,XM_021864902.1	44.936	30.506	35.54	22.773	0.716137	0.00407182	0.000121333	0.530638	0.0734865	0.00599947	1.20047	8.00097e-09	4.06795e-10	NA	K19043//E3 ubiquitin-protein ligase RHF [EC:2.3.2.27];K19043//E3 ubiquitin-protein ligase RHF [EC:2.3.2.27]	XP_021720594.1|1.4e-222|E3 ubiquitin-protein ligase RHF2A-like isoform X2 [Chenopodium quinoa]	NA
LOC110688236	XM_021864956.1	17.843	5.99	4.666	3.413	0.515508	0.310929	0.0568111	0.900724	0.0157725	0.000817606	2.58664	4.8112e-36	2.89021e-38	NA	K17506//protein phosphatase 1L [EC:3.1.3.16]	XP_021720648.1|1.8e-200|probable protein phosphatase 2C 25 [Chenopodium quinoa]	GO:0004722//protein serine/threonine phosphatase activity;GO:0005488//binding;GO:0016788//hydrolase activity, acting on ester bonds;GO:0003824//catalytic activity;GO:0042578//phosphoric ester hydrolase activity;GO:0043169//cation binding;GO:0016791//phosphatase activity;GO:0046872//metal ion binding;GO:0140096//catalytic activity, acting on a protein;GO:0004721//phosphoprotein phosphatase activit…
LOC110688287	XM_021865017.1,BGI_novel_T007334	2.653	1.396	1.84	0.93	0.947279	0.292193	0.0507917	0.614375	0.728103	0.261836	1.64818	0.00674605	0.00126813	NA	K02941//large subunit ribosomal protein LP0+ko03010//Ribosome;K02941//large subunit ribosomal protein LP0+ko03010//Ribosome	XP_021720709.1|2.3e-176|60S acidic ribosomal protein P0-3-like [Chenopodium quinoa]	NA
LOC110688371	XM_021865112.1	7.893	5.64	5.003	4.516	0.20749	0.896505	0.56419	0.420999	0.574948	0.151404	1.0159	0.001019	0.000145366	NA	K04733//interleukin-1 receptor-associated kinase 4 [EC:2.7.11.1]	XP_021720804.1|0.0e+00|L-type lectin-domain containing receptor kinase IV.2-like [Chenopodium quinoa]	NA
LOC110688394	XM_021865135.1	4.343	2.026	2.263	0.873	1.25055	0.140039	0.0149624	1.21812	0.0510073	0.00368177	2.47135	1.74343e-09	8.03829e-11	GRAS	K14494//DELLA protein+ko04075//Plant hormone signal transduction	XP_021720827.1|0.0e+00|scarecrow-like protein 30 [Chenopodium quinoa]	NA
LOC110688397	XM_021865137.1	46.44	20.433	22.083	11.503	0.923021	0.231013	0.0339054	0.856182	0.296051	0.0458064	2.14811	4.77792e-06	3.8753e-07	GRAS	K14494//DELLA protein+ko04075//Plant hormone signal transduction	XP_021720829.1|0.0e+00|scarecrow-like protein 30 [Chenopodium quinoa]	NA
LOC110688398	XM_021865138.1	14.206	8.18	10.303	7.723	0.475024	0.396069	0.0885726	0.187219	0.89666	0.492811	1.09134	0.00011432	1.26316e-05	GRAS	K14494//DELLA protein+ko04075//Plant hormone signal transduction	XP_021720830.1|0.0e+00|scarecrow-like protein 30 [Chenopodium quinoa]	NA
LOC110688401	XM_021865139.1	15.396	11.33	9.683	7.876	0.363007	0.312912	0.0573643	0.621541	0.0222217	0.00125252	1.18052	2.76929e-12	9.1467e-14	GRAS	K14494//DELLA protein+ko04075//Plant hormone signal transduction	XP_021720831.1|0.0e+00|scarecrow-like protein 33 [Chenopodium quinoa]	NA
LOC110688418	XM_021865156.1	16.95	10.326	9.866	7.49	0.465206	0.309184	0.0562026	0.564345	0.242341	0.0336152	1.39478	6.19481e-11	2.38463e-12	NA	K11588//methyl CpG binding protein 2	XP_021720848.1|2.9e-130|methyl-CpG-binding domain-containing protein 6-like [Chenopodium quinoa]	GO:0043657//host cell;GO:0033648//host intracellular membrane-bounded organelle;GO:0033643//host cell part;GO:0018995//host cellular component;GO:0033646//host intracellular part;GO:0033647//host intracellular organelle;GO:0042025//host cell nucleus;GO:0043656//host intracellular region;GO:0110165//cellular anatomical entity;GO:0003677//DNA binding;GO:0003676//nucleic acid binding;GO:0097159//org…
LOC110688421	XM_021865169.1,BGI_novel_T007373,XM_021865168.1	4.05	1.873	1.613	1.88	-0.0844136	0.943457	0.803047	0.107615	0.942867	0.75856	1.44291	8.66193e-05	9.27601e-06	NA	K01807//ribose 5-phosphate isomerase A [EC:5.3.1.6]+ko00030//Pentose phosphate pathway+ko01230//Biosynthesis of amino acids+ko01100//Metabolic pathways+ko01110//Biosynthesis of secondary metabolites+ko00710//Carbon fixation in photosynthetic organisms+ko01200//Carbon metabolism;K07478//putative ATPase;K01807//ribose 5-phosphate isomerase A [EC:5.3.1.6]+ko00030//Pentose phosphate pathway+ko01230//…	XP_021720860.1|1.1e-179|uncharacterized protein LOC110688421 [Chenopodium quinoa]	GO:0110165//cellular anatomical entity;GO:0016021//integral component of membrane;GO:0031224//intrinsic component of membrane;GO:0016020//membrane;
LOC110688423	XM_021865171.1,XM_021865172.1	16.5	6.943	4.683	3.6	0.43372	0.700506	0.2877	0.980377	0.128039	0.0129977	2.30877	6.36629e-08	3.72498e-09	NA	K03979//GTPase [EC:3.6.5.-];K03979//GTPase [EC:3.6.5.-]	XP_021720863.1|0.0e+00|protein TRM32-like [Chenopodium quinoa]	NA
LOC110688479	XM_021865236.1	4.283	2.786	3.14	2.27	0.535688	0.195407	0.0255226	0.403797	0.481425	0.106261	1.13061	0.000130392	1.46394e-05	NA	NA	XP_021720928.1|3.0e-266|protein UPSTREAM OF FLC-like [Chenopodium quinoa]	NA
LOC110688501	XM_021865263.1	6.09	4.313	4.133	3.366	0.368794	0.217212	0.030497	0.464816	0.095504	0.00857358	1.074	1.61498e-09	7.42155e-11	NA	K11671//nuclear factor related to kappa-B-binding protein	XP_021720955.1|0.0e+00|uncharacterized protein LOC110688501 [Chenopodium quinoa]	GO:0032991//protein-containing complex;GO:0005634//nucleus;GO:0043233//organelle lumen;GO:0110165//cellular anatomical entity;GO:1902494//catalytic complex;GO:0000228//nuclear chromosome;GO:0097346//INO80-type complex;GO:0031981//nuclear lumen;GO:0031974//membrane-enclosed lumen;GO:1904949//ATPase complex;GO:0070013//intracellular organelle lumen;GO:0000790//nuclear chromatin;GO:0005622//intracel…
LOC110688502	XM_021865265.1,XM_021865264.1	0.806	0.45	0.536	0.273	0.887464	0.402724	0.0911556	0.699593	0.672042	0.215411	1.64453	0.0143356	0.00305702	NA	K21421//NADPH oxidase 2 [EC:1.-.-.-]+ko04145//Phagosome;K13411//dual oxidase [EC:1.6.3.1 1.11.1.-];K21421//NADPH oxidase 2 [EC:1.-.-.-]+ko04145//Phagosome;K13411//dual oxidase [EC:1.6.3.1 1.11.1.-]	XP_021720956.1|1.2e-239|putative respiratory burst oxidase homolog protein J isoform X1 [Chenopodium quinoa]	NA
LOC110688517	XM_021865285.1	20.823	10.363	16.456	11.746	0.547122	0.288114	0.049634	-0.0750382	0.955048	0.801573	1.03167	0.00187094	0.000290384	NA	K04733//interleukin-1 receptor-associated kinase 4 [EC:2.7.11.1];K13415//protein brassinosteroid insensitive 1 [EC:2.7.10.1 2.7.11.1]+ko04075//Plant hormone signal transduction	XP_021720977.1|0.0e+00|probable leucine-rich repeat receptor-like protein kinase At5g49770 [Chenopodium quinoa]	NA
LOC110688604	XM_021865370.1,BGI_novel_T000739	10.293	5.35	6.54	4.003	0.756426	0.0555607	0.00376662	0.519833	0.29282	0.0450094	1.57101	5.19423e-11	1.97919e-12	NA	K14638//solute carrier family 15 (peptide/histidine transporter), member 3/4	XP_021721062.1|2.3e-186|transmembrane protein 41 homolog [Chenopodium quinoa]	GO:0016020//membrane;GO:0110165//cellular anatomical entity;GO:0031224//intrinsic component of membrane;GO:0016021//integral component of membrane;
LOC110688690	XM_021865432.1,BGI_novel_T007424,XM_021865431.1	8.463	4.986	5.773	3.89	0.642542	0.241351	0.0364119	0.488577	0.559285	0.143845	1.34254	8.63525e-08	5.17617e-09	NA	NA	XP_021721123.1|1.8e-178|phosphoglycerate mutase-like protein 1 [Chenopodium quinoa]	NA
LOC110688695	XM_021865436.1	18.243	16.443	17.786	10.583	0.812529	0.00640163	0.000212946	0.731666	0.0131617	0.000654497	1.00316	9.57425e-06	8.3054e-07	NA	K13416//brassinosteroid insensitive 1-associated receptor kinase 1 [EC:2.7.10.1 2.7.11.1]+ko04016//MAPK signaling pathway - plant+ko04626//Plant-pathogen interaction+ko04075//Plant hormone signal transduction	XP_021722539.1|0.0e+00|BRASSINOSTEROID INSENSITIVE 1-associated receptor kinase 1-like [Chenopodium quinoa]	GO:0016021//integral component of membrane;GO:0031224//intrinsic component of membrane;GO:0110165//cellular anatomical entity;GO:0016020//membrane;GO:0036094//small molecule binding;GO:1901265//nucleoside phosphate binding;GO:0030554//adenyl nucleotide binding;GO:0005102//signaling receptor binding;GO:0035639//purine ribonucleoside triphosphate binding;GO:0043168//anion binding;GO:1901363//hetero…
LOC110688720	XM_021865481.1	5.85	2.686	1.97	1.513	0.428437	0.78997	0.394738	0.87509	0.226871	0.0303512	2.11607	4.68288e-10	2.01793e-11	NA	K22522//cytokinin riboside 5'-monophosphate phosphoribohydrolase [EC:3.2.2.-]	XP_021721173.1|8.1e-124|probable cytokinin riboside 5'-monophosphate phosphoribohydrolase LOGL10 [Chenopodium quinoa]	GO:0065008//regulation of biological quality;GO:0042446//hormone biosynthetic process;GO:0010817//regulation of hormone levels;GO:0065007//biological regulation;GO:0009308//amine metabolic process;GO:0009987//cellular process;GO:0034754//cellular hormone metabolic process;GO:0046483//heterocycle metabolic process;GO:0006807//nitrogen compound metabolic process;GO:0071704//organic substance metabo…
LOC110688728	XM_021865488.1,XM_021865487.1,BGI_novel_T007436,XM_021865489.1,XM_021865490.1,BGI_novel_T007437,BGI_novel_T007439,BGI_novel_T007438	10.276	4.486	3.926	4.46	-0.0608204	0.93886	0.789312	0.139389	0.919583	0.585554	1.40499	2.37673e-12	7.8037e-14	NA	NA	XP_021721180.1|0.0e+00|uncharacterized protein LOC110688728 isoform X2 [Chenopodium quinoa]	NA
LOC110688737	XM_021865498.1	4.306	1.433	2.223	1.156	0.874052	0.302547	0.0541122	0.360312	0.900341	0.498562	2.01626	1.13239e-05	9.99016e-07	NA	K03327//multidrug resistance protein, MATE family	XP_021721190.1|0.0e+00|protein DETOXIFICATION 48-like [Chenopodium quinoa]	NA
LOC110688739	XM_021865509.1,XM_021865502.1,XM_021865517.1	21.236	14.83	10.33	8.713	0.32985	0.305732	0.0551006	0.881745	9.03796e-05	1.89673e-06	1.53536	2.60204e-18	4.89811e-20	NA	K12655//OTU domain-containing protein 5 [EC:3.4.19.12];K16743//abnormal spindle-like microcephaly-associated protein;K13717//OTU domain-containing protein 3 [EC:3.4.19.12];K12655//OTU domain-containing protein 5 [EC:3.4.19.12];K16743//abnormal spindle-like microcephaly-associated protein;K13717//OTU domain-containing protein 3 [EC:3.4.19.12];K12655//OTU domain-containing protein 5 [EC:3.4.19.12];…	XP_021721194.1|3.6e-129|OTU domain-containing protein DDB_G0284757-like [Chenopodium quinoa]	NA
LOC110688740	XM_021865499.1	4.366	2.713	2.056	1.88	0.189335	0.865873	0.511126	0.615615	0.185077	0.0223882	1.40046	1.15677e-05	1.02228e-06	FAR1	K17604//zinc finger SWIM domain-containing protein 3	XP_021721191.1|0.0e+00|protein FAR1-RELATED SEQUENCE 8-like [Chenopodium quinoa]	NA
LOC110688742	BGI_novel_T007442,XM_021865500.1	60.843	28.92	34.76	23.243	0.619761	0.315591	0.0584066	0.408142	0.634799	0.187552	1.57908	2.24235e-07	1.43992e-08	NA	K00924//kinase [EC:2.7.1.-];K00924//kinase [EC:2.7.1.-]	XP_021718638.1|0.0e+00|receptor-like protein kinase HAIKU2 [Chenopodium quinoa]	GO:0016021//integral component of membrane;GO:0031224//intrinsic component of membrane;GO:0110165//cellular anatomical entity;GO:0016020//membrane;GO:0016301//kinase activity;GO:0003824//catalytic activity;GO:0005524//ATP binding;GO:0016772//transferase activity, transferring phosphorus-containing groups;GO:0017076//purine nucleotide binding;GO:0016773//phosphotransferase activity, alcohol group …
LOC110688804	XM_021865558.1	7.16	5.05	4.92	3.12	0.723804	0.00450112	0.000137364	0.785027	0.00948084	0.00043781	1.41013	7.14834e-13	2.2277e-14	NA	K13863//solute carrier family 7 (cationic amino acid transporter), member 1;K00967//ethanolamine-phosphate cytidylyltransferase [EC:2.7.7.14]+ko00440//Phosphonate and phosphinate metabolism+ko01100//Metabolic pathways+ko00564//Glycerophospholipid metabolism	XP_021721250.1|1.5e-288|uncharacterized protein LOC110688804 [Chenopodium quinoa]	NA
LOC110688823	XM_021865577.1	8.803	4.99	6.656	5.063	0.45274	0.463923	0.120462	0.0956275	0.936869	0.742392	1.01036	0.00152969	0.000231787	NA	K00549//5-methyltetrahydropteroyltriglutamate--homocysteine methyltransferase [EC:2.1.1.14]+ko01230//Biosynthesis of amino acids+ko00450//Selenocompound metabolism+ko01100//Metabolic pathways+ko01110//Biosynthesis of secondary metabolites+ko00270//Cysteine and methionine metabolism;K04733//interleukin-1 receptor-associated kinase 4 [EC:2.7.11.1]	XP_021721269.1|0.0e+00|protein QUIRKY-like [Chenopodium quinoa]	NA
LOC110688943	XM_021865692.1	0.383	0.28	0.383	0.186	1.00767	0.217996	0.0306586	0.626015	0.562483	0.145141	1.21001	0.0107192	0.0021761	NA	K15078//structure-specific endonuclease subunit SLX1 [EC:3.6.1.-]	XP_021721384.1|0.0e+00|putative disease resistance protein RGA1 [Chenopodium quinoa]	NA
LOC110688965	XM_021865711.1	1.946	0.47	12.873	0.093	1.45273	0.227084	0.0329674	1.34399	0.362417	0.0640139	3.7756	4.69423e-06	3.80132e-07	NA	K15015//solute carrier family 32 (vesicular inhibitory amino acid transporter)	XP_021865727.1|5.6e-188|amino acid transporter AVT1I-like isoform X1 [Spinacia oleracea]	GO:0016020//membrane;GO:0031224//intrinsic component of membrane;GO:0016021//integral component of membrane;GO:0110165//cellular anatomical entity;
LOC110688966	XM_021865712.1	0.546	0.07	0.2	0.096	0.777545	0.655833	0.246533	-0.181092	0.955879	0.803204	2.32795	0.00514368	0.000927092	NA	K15015//solute carrier family 32 (vesicular inhibitory amino acid transporter)	KNA23576.1|4.8e-201|hypothetical protein SOVF_023890 [Spinacia oleracea]	GO:0016020//membrane;GO:0110165//cellular anatomical entity;GO:0016021//integral component of membrane;GO:0031224//intrinsic component of membrane;
LOC110688976	XM_021865720.1	10.213	6.1	7.42	4.433	0.803291	0.031607	0.00171349	0.564922	0.278256	0.0412551	1.41174	5.47291e-07	3.73399e-08	NA	NA	XP_021721412.1|9.9e-125|uncharacterized protein At5g19025-like [Chenopodium quinoa]	NA
LOC110688978	XM_021865722.1	51.846	8.593	8.416	3.14	1.26069	0.175913	0.0216579	1.2821	0.210066	0.0271229	3.94594	7.117e-12	2.46952e-13	NA	K02183//calmodulin+ko04016//MAPK signaling pathway - plant+ko04626//Plant-pathogen interaction+ko04070//Phosphatidylinositol signaling system	XP_021721414.1|8.6e-113|probable calcium-binding protein CML45 [Chenopodium quinoa]	GO:0043167//ion binding;GO:0046872//metal ion binding;GO:0005488//binding;GO:0043169//cation binding;GO:0005509//calcium ion binding;
LOC110689125	XM_021865854.1	3.81	2.803	3.543	2.073	0.835054	0.0322278	0.00175946	0.532767	0.377717	0.0690543	1.08649	0.00151109	0.000228674	NA	NA	XP_021721546.1|1.3e-204|uncharacterized protein LOC110689125 [Chenopodium quinoa]	GO:0008152//metabolic process;GO:0006807//nitrogen compound metabolic process;GO:0006139//nucleobase-containing compound metabolic process;GO:1901360//organic cyclic compound metabolic process;GO:0006396//RNA processing;GO:0046483//heterocycle metabolic process;GO:0009987//cellular process;GO:0034641//cellular nitrogen compound metabolic process;GO:0044237//cellular metabolic process;GO:0043170//…
LOC110689156	XM_021865885.1	13.083	6.846	4.333	3	0.565016	0.531391	0.155939	1.18683	0.0700913	0.00559782	2.26424	3.9132e-08	2.20988e-09	NA	K19041//E3 ubiquitin-protein ligase RNF38/44 [EC:2.3.2.27];K19038//E3 ubiquitin-protein ligase ATL41 [EC:2.3.2.27];K15692//E3 ubiquitin-protein ligase RNF13 [EC:2.3.2.27]	XP_021721577.1|1.1e-176|RING-H2 finger protein ATL2-like [Chenopodium quinoa]	GO:0031224//intrinsic component of membrane;GO:0016020//membrane;GO:0110165//cellular anatomical entity;GO:0016021//integral component of membrane;
LOC110689229	XM_021865958.1,BGI_novel_T007570	7.033	4.55	5.903	3.856	0.690482	0.0218936	0.00106044	0.35288	0.504621	0.116292	1.08693	5.12713e-07	3.48584e-08	NA	K14692//solute carrier family 30 (zinc transporter), member 5/7;K14692//solute carrier family 30 (zinc transporter), member 5/7	XP_021721650.1|5.0e-229|metal tolerance protein C2-like [Chenopodium quinoa]	GO:0016021//integral component of membrane;GO:0031224//intrinsic component of membrane;GO:0016020//membrane;GO:0110165//cellular anatomical entity;GO:0005215//transporter activity;GO:0015075//ion transmembrane transporter activity;GO:0008324//cation transmembrane transporter activity;GO:0022857//transmembrane transporter activity;
LOC110689254	XM_021865995.1	8.28	5.163	6.016	3.106	0.661598	0.730847	0.323387	0.674719	0.703548	0.24046	1.50184	0.0174157	0.00384224	NA	K13466//EIX receptor 1/2+ko04626//Plant-pathogen interaction;K03021//DNA-directed RNA polymerase III subunit RPC2 [EC:2.7.7.6]+ko03020//RNA polymerase;K19613//leucine-rich repeat protein SHOC2	XP_021721687.1|0.0e+00|LRR receptor-like serine/threonine-protein kinase FLS2 [Chenopodium quinoa]	NA
LOC110689279	XM_021866030.1	271.17	88.626	104.906	57.123	0.938576	0.000153261	2.48224e-06	0.730415	0.121541	0.0120931	2.45281	2.4974e-41	1.16445e-43	NA	NA	XP_021721722.1|4.9e-108|uncharacterized protein LOC110689279 [Chenopodium quinoa]	NA
LOC110689293	XM_021866041.1	0.433	0.05	0.17	0.033	1.41724	0.267849	0.0437024	0.341585	0.919583	0.635839	3.10519	0.000623067	8.34551e-05	NA	NA	XP_021721733.1|3.1e-270|QWRF motif-containing protein 7-like [Chenopodium quinoa]	NA
LOC110689306	XM_021866062.1,BGI_novel_T007607,XM_021866063.1,XM_021866058.1,BGI_novel_T007606,BGI_novel_T007609,XM_021866060.1,XM_021866061.1,XM_021866059.1,BGI_novel_T007608	9.143	4.68	5.26	2.883	0.923997	0.000507603	1.01355e-05	0.804241	0.0025462	9.19218e-05	1.86673	6.58455e-16	1.51509e-17	NA	K04715//ceramide kinase [EC:2.7.1.138]+ko00600//Sphingolipid metabolism;K04715//ceramide kinase [EC:2.7.1.138]+ko00600//Sphingolipid metabolism;K04715//ceramide kinase [EC:2.7.1.138]+ko00600//Sphingolipid metabolism;K04715//ceramide kinase [EC:2.7.1.138]+ko00600//Sphingolipid metabolism;K04715//ceramide kinase [EC:2.7.1.138]+ko00600//Sphingolipid metabolism;K04715//ceramide kinase [EC:2.7.1.138]+…	XP_021721752.1|0.0e+00|ceramide kinase-like isoform X3 [Chenopodium quinoa]	NA
LOC110689312	XM_021866069.1	20.853	7.136	7.386	4.823	0.69041	0.0272545	0.00141396	0.670452	0.0131206	0.000651876	2.28788	3.13505e-15	7.76437e-17	NA	K01805//xylose isomerase [EC:5.3.1.5]+ko00040//Pentose and glucuronate interconversions+ko01100//Metabolic pathways+ko00051//Fructose and mannose metabolism	XP_021721761.1|7.0e-211|putative lipase ROG1 [Chenopodium quinoa]	NA
LOC110689325	XM_021866091.1	75.873	54.226	51.103	39.753	0.434121	0.36115	0.0744002	0.551082	0.0811022	0.00687208	1.14117	8.91542e-06	7.67587e-07	NA	K20604//mitogen-activated protein kinase kinase 9 [EC:2.7.12.2]+ko04016//MAPK signaling pathway - plant	XP_021721783.1|1.2e-193|mitogen-activated protein kinase kinase 9-like [Chenopodium quinoa]	GO:0032559//adenyl ribonucleotide binding;GO:0032555//purine ribonucleotide binding;GO:0035639//purine ribonucleoside triphosphate binding;GO:0005488//binding;GO:0097367//carbohydrate derivative binding;GO:0140096//catalytic activity, acting on a protein;GO:0016301//kinase activity;GO:1901363//heterocyclic compound binding;GO:0097159//organic cyclic compound binding;GO:0004672//protein kinase act…
LOC110689337	XM_021866109.1	22.143	11.206	9.22	6.22	0.622841	0.178083	0.0220804	0.917053	0.0329293	0.0020703	2.01631	4.97848e-13	1.532e-14	NA	K14509//ethylene receptor [EC:2.7.13.-]+ko04016//MAPK signaling pathway - plant+ko04075//Plant hormone signal transduction	XP_021721801.1|0.0e+00|ethylene receptor 2-like [Chenopodium quinoa]	GO:0042175//nuclear outer membrane-endoplasmic reticulum membrane network;GO:0043227//membrane-bounded organelle;GO:0031090//organelle membrane;GO:0016021//integral component of membrane;GO:0012505//endomembrane system;GO:0016020//membrane;GO:0005789//endoplasmic reticulum membrane;GO:0110165//cellular anatomical entity;GO:0031224//intrinsic component of membrane;GO:0043226//organelle;GO:0043169/…
LOC110689390	XM_021866171.1	100.896	48.346	55.486	45.686	0.364049	0.492885	0.133484	0.200506	0.673102	0.216164	1.36094	5.63924e-16	1.28656e-17	NA	K01725//cyanate lyase [EC:4.2.1.104]+ko00910//Nitrogen metabolism	XP_021721863.1|7.3e-87|cyanate hydratase-like [Chenopodium quinoa]	GO:0034641//cellular nitrogen compound metabolic process;GO:0006082//organic acid metabolic process;GO:0044281//small molecule metabolic process;GO:0006807//nitrogen compound metabolic process;GO:0044237//cellular metabolic process;GO:0009987//cellular process;GO:1901564//organonitrogen compound metabolic process;GO:0009439//cyanate metabolic process;GO:0071704//organic substance metabolic proces…
LOC110689396	XM_021866181.1	37.386	25.18	21.533	21.31	0.103099	0.898091	0.639395	0.356066	0.487814	0.109095	1.03013	1.25928e-06	9.07227e-08	NA	NA	XP_021721873.1|1.6e-85|uncharacterized protein LOC110689396 [Chenopodium quinoa]	NA
LOC110689420	XM_021866210.1,XM_021866211.1	28.693	17.22	20.856	13.923	0.652149	0.0269655	0.00139368	0.413537	0.174141	0.0204981	1.2642	9.38345e-20	1.55472e-21	NA	K19626//inversin;K15503//serine/threonine-protein phosphatase 6 regulatory ankyrin repeat subunit B;K12489//Arf-GAP with coiled-coil, ANK repeat and PH domain-containing protein+ko04144//Endocytosis;K21440//ankyrin repeat domain-containing protein 50;K19626//inversin;K15503//serine/threonine-protein phosphatase 6 regulatory ankyrin repeat subunit B;K12489//Arf-GAP with coiled-coil, ANK repeat and…	XP_021721903.1|2.9e-274|putative E3 ubiquitin-protein ligase XBAT34 isoform X2 [Chenopodium quinoa]	NA
LOC110689432	XM_021866221.1	70.793	16.763	15.973	8.836	0.897567	0.0343288	0.00190371	0.977943	0.0522733	0.00381563	3.17293	5.77215e-31	4.76934e-33	MYB	K09422//transcription factor MYB, plant	XP_021721913.1|2.3e-181|transcription factor MYB4-like [Chenopodium quinoa]	GO:0009056//catabolic process;GO:0044248//cellular catabolic process;GO:0008152//metabolic process;GO:0006950//response to stress;GO:0006979//response to oxidative stress;GO:0009987//cellular process;GO:0050896//response to stimulus;GO:0042743//hydrogen peroxide metabolic process;GO:0072593//reactive oxygen species metabolic process;GO:0042744//hydrogen peroxide catabolic process;GO:0044237//cell…
LOC110689461	XM_021866250.1	0.76	0.183	0.226	0.04	1.61062	0.170974	0.0206436	1.35821	0.344653	0.0589283	3.73293	4.2927e-06	3.44823e-07	NA	K07456//DNA mismatch repair protein MutS2+ko03430//Mismatch repair	XP_021721942.1|0.0e+00|uncharacterized protein LOC110689461 [Chenopodium quinoa]	NA
LOC110689503	XM_021866287.1	11.746	5.026	8.476	5.4	0.70505	0.150687	0.0167428	0.0319741	0.991791	0.930633	1.31147	0.00642095	0.00119741	NA	K20222//importin-5;K10999//cellulose synthase A [EC:2.4.1.12];K20924//cellulose synthase-like protein [EC:2.4.1.-]	XP_021721979.1|1.7e-136|cellulose synthase-like protein E6 [Chenopodium quinoa]	GO:0005976//polysaccharide metabolic process;GO:0034637//cellular carbohydrate biosynthetic process;GO:0005975//carbohydrate metabolic process;GO:0006073//cellular glucan metabolic process;GO:0033692//cellular polysaccharide biosynthetic process;GO:0030243//cellulose metabolic process;GO:0071554//cell wall organization or biogenesis;GO:0045229//external encapsulating structure organization;GO:005…
LOC110689510	BGI_novel_T007630,XM_021866294.1	1.873	0.903	1.326	0.52	1.18559	0.138062	0.014552	0.874776	0.482878	0.106969	2.36094	9.00883e-06	7.76215e-07	NA	K13420//LRR receptor-like serine/threonine-protein kinase FLS2 [EC:2.7.11.1]+ko04016//MAPK signaling pathway - plant+ko04626//Plant-pathogen interaction;K20718//LRR receptor-like serine/threonine-protein kinase ERECTA [EC:2.7.11.1]+ko04016//MAPK signaling pathway - plant	XP_021721986.1|0.0e+00|receptor-like protein kinase 5 [Chenopodium quinoa]	NA
LOC110689527	BGI_novel_T007643,XM_021866307.1	0.896	0.063	0.146	0.053	1.2455	0.379137	0.0811168	0.260564	0.923744	0.702839	4.31987	2.23173e-08	1.21482e-09	NA	K15255//ATP-dependent DNA helicase PIF1 [EC:3.6.4.12];K15255//ATP-dependent DNA helicase PIF1 [EC:3.6.4.12]	XP_021721999.1|5.1e-153|ATP-dependent DNA helicase PIF2-like [Chenopodium quinoa]	NA
LOC110689558	XM_021866331.1	18.583	0.266	0.21	0	1.10598	0.399612	0.0898529	1.20262	0.39604	0.0748843	8.28338	6.83653e-28	6.76077e-30	NA	NA	XP_021722023.1|2.6e-99|11 kDa late embryogenesis abundant protein-like [Chenopodium quinoa]	GO:0009791//post-embryonic development;GO:0048316//seed development;GO:0032502//developmental process;GO:0000003//reproduction;GO:0048731//system development;GO:0061458//reproductive system development;GO:0022414//reproductive process;GO:0009793//embryo development ending in seed dormancy;GO:0003006//developmental process involved in reproduction;GO:0048856//anatomical structure development;GO:00…
LOC110689559	XM_021866332.1	0.436	0.143	0.036	0.023	0.12871	0.950522	0.82763	1.03429	0.575558	0.151729	3.21086	0.000986787	0.000140193	NA	K13412//calcium-dependent protein kinase [EC:2.7.11.1]+ko04626//Plant-pathogen interaction	XP_010671825.1|6.8e-272|PREDICTED: calcium-dependent protein kinase 24 [Beta vulgaris subsp. vulgaris]	GO:0006796//phosphate-containing compound metabolic process;GO:0008152//metabolic process;GO:0009987//cellular process;GO:0043170//macromolecule metabolic process;GO:0050794//regulation of cellular process;GO:0007165//signal transduction;GO:0006807//nitrogen compound metabolic process;GO:0019538//protein metabolic process;GO:0016310//phosphorylation;GO:0050896//response to stimulus;GO:0044267//ce…
LOC110689592	XM_021866354.1	0.676	0.25	0.316	0.13	0.873338	0.614908	0.212856	0.747703	0.734308	0.267913	2.32714	0.00319346	0.000535556	NA	K01051//pectinesterase [EC:3.1.1.11]+ko00040//Pentose and glucuronate interconversions+ko01100//Metabolic pathways	XP_021722046.1|1.5e-244|probable pectinesterase 15 [Chenopodium quinoa]	NA
LOC110689612	XM_021866377.1	27.146	16.053	14.57	12.16	0.282238	0.87805	0.533108	0.473004	0.716931	0.252588	1.32606	0.00211361	0.000333742	C2H2	K22410//PR domain zinc finger protein 16;K12309//beta-galactosidase [EC:3.2.1.23]+ko00600//Sphingolipid metabolism+ko00604//Glycosphingolipid biosynthesis - ganglio series+ko00531//Glycosaminoglycan degradation+ko00511//Other glycan degradation+ko01100//Metabolic pathways+ko00052//Galactose metabolism;K14794//ribosomal RNA-processing protein 12	XP_021722069.1|2.2e-221|zinc finger protein WIP3-like [Chenopodium quinoa]	GO:0005488//binding;GO:0003676//nucleic acid binding;GO:1901363//heterocyclic compound binding;GO:0097159//organic cyclic compound binding;
LOC110689699	XM_021866478.1	7.586	2.513	3.803	2.376	0.744215	0.00664826	0.000224338	0.192319	0.829034	0.373737	1.8895	5.56748e-33	4.04482e-35	NA	K05665//ATP-binding cassette, subfamily C (CFTR/MRP), member 1 [EC:7.6.2.3]+ko02010//ABC transporters	XP_021848338.1|0.0e+00|ABC transporter C family member 5-like [Spinacia oleracea]	GO:0031224//intrinsic component of membrane;GO:0110165//cellular anatomical entity;GO:0016020//membrane;GO:0016021//integral component of membrane;GO:0016787//hydrolase activity;GO:0017111//nucleoside-triphosphatase activity;GO:1901265//nucleoside phosphate binding;GO:0003824//catalytic activity;GO:1901363//heterocyclic compound binding;GO:0015399//primary active transmembrane transporter activit…
LOC110689701	XM_021866480.1	17.48	16.973	13.28	9.793	0.491998	0.263781	0.0426706	0.879384	0.00272395	9.92937e-05	1.04591	2.06417e-06	1.5547e-07	NA	K20888//xyloglucan galactosyltransferase MUR3 [EC:2.4.1.-]	XP_021722172.1|0.0e+00|xyloglucan galactosyltransferase MUR3-like [Chenopodium quinoa]	GO:1901576//organic substance biosynthetic process;GO:0043412//macromolecule modification;GO:0006464//cellular protein modification process;GO:0009058//biosynthetic process;GO:0009059//macromolecule biosynthetic process;GO:0044237//cellular metabolic process;GO:1901566//organonitrogen compound biosynthetic process;GO:0008152//metabolic process;GO:0070085//glycosylation;GO:0071704//organic substan…
LOC110689730	XM_021866512.1	49.22	34.043	44.236	27.693	0.754415	0.00212109	5.50213e-05	0.411343	0.289293	0.0440826	1.05111	1.90278e-07	1.20907e-08	NA	K15631//molybdenum cofactor sulfurtransferase [EC:2.8.1.9]+ko00790//Folate biosynthesis	XP_021722204.1|4.4e-175|mitochondrial amidoxime-reducing component 1-like [Chenopodium quinoa]	GO:0003824//catalytic activity;GO:0005488//binding;GO:0043167//ion binding;GO:0019842//vitamin binding;GO:0046914//transition metal ion binding;GO:1901363//heterocyclic compound binding;GO:0036094//small molecule binding;GO:0046872//metal ion binding;GO:0097159//organic cyclic compound binding;GO:0030151//molybdenum ion binding;GO:0030170//pyridoxal phosphate binding;GO:0043168//anion binding;GO:…
LOC110689762	XM_021866564.1	0.91	0.15	0.343	0.21	0.373396	0.898091	0.60209	-0.223266	0.942546	0.757497	1.90014	0.0485958	0.013123	NA	NA	XP_021722256.1|4.1e-116|uncharacterized protein LOC110689762 [Chenopodium quinoa]	NA
LOC110689780	BGI_novel_T007708,XM_021866584.1	313.16	333.143	405.91	115.793	1.56462	0.0607298	0.00425533	1.40719	0.0795261	0.00669038	1.52656	0.0285862	0.00690865	NA	K05387//glutamate receptor, ionotropic, plant;K05387//glutamate receptor, ionotropic, plant	XP_021722276.1|3.5e-88|pathogenesis-related protein STH-21-like [Chenopodium quinoa]	NA
LOC110689798	XM_021866605.1	0.373	0.073	0.326	0.17	0.935321	0.282029	0.0478666	-0.634273	0.824419	0.367481	1.31548	0.0357245	0.00901654	NA	K17604//zinc finger SWIM domain-containing protein 3	XP_021714388.1|0.0e+00|uncharacterized protein LOC110682364 [Chenopodium quinoa]	NA
LOC110689825	XM_021866652.1	2181.9	453.353	397.113	247.433	0.707316	0.388353	0.0852975	0.926913	0.197981	0.0248078	3.24282	3.08021e-14	8.34998e-16	NA	NA	XP_021722344.1|1.4e-43|late embryogenesis abundant protein Lea5-like [Chenopodium quinoa]	NA
LOC110689844	XM_021866677.1	0.31	0.02	0.05	0	0.715479	0.622847	0.218794	0.217491	0.919583	0.561414	3.92395	0.000204651	2.41794e-05	NA	K10955//mucin-2	XP_021722369.1|0.0e+00|basic proline-rich protein-like, partial [Chenopodium quinoa]	GO:0016020//membrane;GO:0016021//integral component of membrane;GO:0031224//intrinsic component of membrane;GO:0110165//cellular anatomical entity;GO:0015075//ion transmembrane transporter activity;GO:0046873//metal ion transmembrane transporter activity;GO:0022890//inorganic cation transmembrane transporter activity;GO:0005215//transporter activity;GO:0015318//inorganic molecular entity transmem…
LOC110689863	XM_021866696.1	1.136	0.73	0.646	0.44	0.55429	0.614314	0.211984	0.782106	0.310222	0.0493885	1.54161	0.000261832	3.17473e-05	NA	K13415//protein brassinosteroid insensitive 1 [EC:2.7.10.1 2.7.11.1]+ko04075//Plant hormone signal transduction	XP_021722388.1|0.0e+00|MDIS1-interacting receptor like kinase 2-like [Chenopodium quinoa]	GO:0110165//cellular anatomical entity;GO:0031224//intrinsic component of membrane;GO:0016020//membrane;GO:0016021//integral component of membrane;GO:0097367//carbohydrate derivative binding;GO:1901265//nucleoside phosphate binding;GO:0032559//adenyl ribonucleotide binding;GO:0035639//purine ribonucleoside triphosphate binding;GO:0016301//kinase activity;GO:0032553//ribonucleotide binding;GO:0003…
LOC110690027	XM_021866853.1	8.776	4.356	4.886	2.886	0.834649	0.0035059	0.000100955	0.69837	0.0259854	0.00152899	1.81947	6.50065e-16	1.49296e-17	NA	K17616//CTD small phosphatase-like protein 2 [EC:3.1.3.-]	XP_021722545.1|1.9e-275|CTD small phosphatase-like protein 2 [Chenopodium quinoa]	GO:0003824//catalytic activity;GO:0042578//phosphoric ester hydrolase activity;GO:0016788//hydrolase activity, acting on ester bonds;GO:0016791//phosphatase activity;GO:0016787//hydrolase activity;
LOC110690031	XM_021866857.1	14.413	7.963	5.27	4.406	0.308471	0.784118	0.38441	0.915948	0.0961816	0.00865127	1.88273	2.84212e-08	1.57235e-09	NA	K14488//SAUR family protein+ko04075//Plant hormone signal transduction	XP_021722549.1|9.6e-83|auxin-induced protein 10A5-like [Chenopodium quinoa]	GO:0009725//response to hormone;GO:0010033//response to organic substance;GO:0042221//response to chemical;GO:0009733//response to auxin;GO:0009719//response to endogenous stimulus;GO:0050896//response to stimulus;
LOC110690063	XM_021866901.1,XM_021866907.1,XM_021866912.1,BGI_novel_T000771,BGI_novel_T000772,XM_021866917.1,XM_021866891.1,XM_021866896.1	24.126	15.156	19.163	12.1	0.82304	0.00856309	0.000310011	0.530606	0.107458	0.0101505	1.39789	8.96149e-12	3.13286e-13	NA	K15255//ATP-dependent DNA helicase PIF1 [EC:3.6.4.12];K15255//ATP-dependent DNA helicase PIF1 [EC:3.6.4.12];K15255//ATP-dependent DNA helicase PIF1 [EC:3.6.4.12]	XP_021722583.1|3.2e-197|uncharacterized protein LOC110690063 isoform X1 [Chenopodium quinoa]	NA
LOC110690105	XM_021866931.1	0.43	0.116	0.206	0.096	0.822282	0.630259	0.224542	0.250399	0.932332	0.725654	2.07503	0.0102909	0.00207332	NA	K07466//replication factor A1+ko03420//Nucleotide excision repair+ko03030//DNA replication+ko03440//Homologous recombination+ko03430//Mismatch repair	XP_021722623.1|6.5e-137|uncharacterized protein LOC110690105 [Chenopodium quinoa]	NA
LOC110690145	BGI_novel_T007801,XM_021866970.1	4.823	2.41	2.736	2.373	0.277402	0.679214	0.269742	0.131664	0.919583	0.6099	1.23838	6.54242e-06	5.45828e-07	NA	K04733//interleukin-1 receptor-associated kinase 4 [EC:2.7.11.1];K04733//interleukin-1 receptor-associated kinase 4 [EC:2.7.11.1]	XP_021722662.1|0.0e+00|inactive protein kinase SELMODRAFT_444075-like [Chenopodium quinoa]	GO:0003824//catalytic activity;GO:0043167//ion binding;GO:0005524//ATP binding;GO:0097159//organic cyclic compound binding;GO:0004713//protein tyrosine kinase activity;GO:0036094//small molecule binding;GO:0032559//adenyl ribonucleotide binding;GO:0016773//phosphotransferase activity, alcohol group as acceptor;GO:0032553//ribonucleotide binding;GO:1901363//heterocyclic compound binding;GO:0097367…
LOC110690314	XM_021867136.1	15.89	7.643	10.39	8.096	0.422358	0.31851	0.0592643	0.0321225	0.975877	0.879442	1.18584	2.44252e-08	1.3391e-09	NA	K20891//beta-glucuronosyltransferase [EC:2.4.1.-]	XP_021722828.1|4.7e-254|beta-glucuronosyltransferase GlcAT14B-like [Chenopodium quinoa]	GO:0031224//intrinsic component of membrane;GO:0110165//cellular anatomical entity;GO:0016021//integral component of membrane;GO:0016020//membrane;
LOC110690337	XM_021867165.1	1.77	0.733	0.98	0.516	0.673243	0.726099	0.316223	0.463318	0.887526	0.477001	1.86076	0.00106952	0.000153878	WRKY	K12835//ATP-dependent RNA helicase DDX42 [EC:3.6.4.13]+ko03040//Spliceosome;K13424//WRKY transcription factor 33+ko04016//MAPK signaling pathway - plant+ko04626//Plant-pathogen interaction	XP_021722857.1|1.6e-212|probable WRKY transcription factor 28 [Chenopodium quinoa]	GO:0005634//nucleus;GO:0043226//organelle;GO:0043229//intracellular organelle;GO:0005622//intracellular;GO:0110165//cellular anatomical entity;GO:0043227//membrane-bounded organelle;GO:0043231//intracellular membrane-bounded organelle;GO:0005488//binding;GO:0003677//DNA binding;GO:0140110//transcription regulator activity;GO:0003676//nucleic acid binding;GO:0043565//sequence-specific DNA binding;…
LOC110690389	XM_021867206.1	1.83	0.426	0.666	0.293	1.15477	0.083014	0.00675513	0.560484	0.796387	0.329268	2.74371	8.09778e-10	3.5843e-11	NA	K01183//chitinase [EC:3.2.1.14]+ko00520//Amino sugar and nucleotide sugar metabolism+ko01100//Metabolic pathways;K12447//UDP-sugar pyrophosphorylase [EC:2.7.7.64]+ko00520//Amino sugar and nucleotide sugar metabolism+ko00040//Pentose and glucuronate interconversions+ko01100//Metabolic pathways+ko00052//Galactose metabolism+ko00053//Ascorbate and aldarate metabolism;K03515//DNA repair protein REV1 …	XP_021722898.1|1.4e-224|uncharacterized protein LOC110690389 [Chenopodium quinoa]	NA
LOC110690412	XM_021867236.1	98.31	54.746	66.42	50.696	0.469638	0.157991	0.0181151	0.225223	0.684543	0.225177	1.16985	5.22625e-06	4.27407e-07	NA	NA	XP_021722928.1|2.6e-96|uncharacterized protein LOC110690412 [Chenopodium quinoa]	NA
LOC110690415	XM_021867239.1	41.723	25.59	27.233	17.226	0.73747	0.0123635	0.000501279	0.671619	0.00761253	0.000338694	1.48229	2.00874e-11	7.29248e-13	NA	K04733//interleukin-1 receptor-associated kinase 4 [EC:2.7.11.1];K10443//kelch-like protein 2/3;K06027//vesicle-fusing ATPase [EC:3.6.4.6];K01213//galacturan 1,4-alpha-galacturonidase [EC:3.2.1.67]+ko00040//Pentose and glucuronate interconversions+ko01100//Metabolic pathways	XP_021844600.1|3.0e-227|F-box/kelch-repeat protein SKIP11-like [Spinacia oleracea]	NA
LOC110690429	XM_021867260.1,XM_021867259.1	30.693	13.02	10.653	6.996	0.622792	0.149472	0.0165421	0.962653	0.0181886	0.00097101	2.31641	1.10364e-21	1.56771e-23	NA	K04733//interleukin-1 receptor-associated kinase 4 [EC:2.7.11.1];K04733//interleukin-1 receptor-associated kinase 4 [EC:2.7.11.1]	XP_021722951.1|8.1e-241|probable serine/threonine-protein kinase PBL3 [Chenopodium quinoa]	GO:0005488//binding;GO:1901265//nucleoside phosphate binding;GO:0016773//phosphotransferase activity, alcohol group as acceptor;GO:0032553//ribonucleotide binding;GO:0016301//kinase activity;GO:0004674//protein serine/threonine kinase activity;GO:0003824//catalytic activity;GO:0035639//purine ribonucleoside triphosphate binding;GO:0000166//nucleotide binding;GO:0140096//catalytic activity, acting…
LOC110690443	XM_021867275.1	17.903	11.44	12.51	9.8	0.429769	0.485606	0.130232	0.328701	0.555191	0.141716	1.07906	3.97094e-06	3.15877e-07	NA	K01176//alpha-amylase [EC:3.2.1.1]+ko01100//Metabolic pathways+ko00500//Starch and sucrose metabolism	XP_021722967.1|0.0e+00|alpha-amylase 3, chloroplastic-like [Chenopodium quinoa]	GO:0071704//organic substance metabolic process;GO:0044238//primary metabolic process;GO:0005975//carbohydrate metabolic process;GO:0008152//metabolic process;GO:0004553//hydrolase activity, hydrolyzing O-glycosyl compounds;GO:0005488//binding;GO:0043169//cation binding;GO:0004556//alpha-amylase activity;GO:0016798//hydrolase activity, acting on glycosyl bonds;GO:0016787//hydrolase activity;GO:00…
LOC110690456	XM_021867293.1	41.433	30.89	35.983	23.84	0.663672	0.218572	0.0308026	0.481315	0.266168	0.0385866	1.01321	4.61864e-07	3.11709e-08	NA	K19589//release factor glutamine methyltransferase [EC:2.1.1.297]	XP_021722985.1|2.3e-176|uncharacterized protein LOC110690456 [Chenopodium quinoa]	GO:0016021//integral component of membrane;GO:0110165//cellular anatomical entity;GO:0016020//membrane;GO:0031224//intrinsic component of membrane;
LOC110690462	XM_021867300.1	0.446	0.073	0.233	0.086	1.15925	0.279	0.0469024	-0.0976271	0.979063	0.888726	2.31833	0.000677489	9.15934e-05	NA	K17545//serine/threonine-protein kinase ULK4 [EC:2.7.11.1];K04733//interleukin-1 receptor-associated kinase 4 [EC:2.7.11.1];K15376//gephyrin [EC:2.10.1.1 2.7.7.75]+ko01100//Metabolic pathways+ko00790//Folate biosynthesis	PNX86311.1|2.1e-135|hypothetical protein L195_g042389 [Trifolium pratense]	NA
LOC110690492	XM_021867340.1	104.053	40.583	55.476	54.333	0.119677	0.898091	0.583222	-0.285967	0.713523	0.249668	1.15647	2.92677e-06	2.27358e-07	NAC	K00521//ferric-chelate reductase [EC:1.16.1.7];K13126//polyadenylate-binding protein+ko03015//mRNA surveillance pathway+ko03018//RNA degradation+ko03013//RNA transport;K16296//serine carboxypeptidase-like clade I [EC:3.4.16.-]	XP_021723032.1|5.0e-173|NAC domain-containing protein 83-like [Chenopodium quinoa]	GO:0065007//biological regulation;GO:0051252//regulation of RNA metabolic process;GO:0019222//regulation of metabolic process;GO:0019219//regulation of nucleobase-containing compound metabolic process;GO:2000112//regulation of cellular macromolecule biosynthetic process;GO:0051171//regulation of nitrogen compound metabolic process;GO:0006355//regulation of transcription, DNA-templated;GO:0050789/…
LOC110690493	XM_021867342.1	1.9	0.806	1.333	0.916	0.567729	0.540581	0.16238	-0.0730815	0.970767	0.863461	1.2064	0.0340575	0.00851234	NA	K04733//interleukin-1 receptor-associated kinase 4 [EC:2.7.11.1]	XP_021723034.1|0.0e+00|putative receptor-like protein kinase At4g00960 [Chenopodium quinoa]	NA
LOC110690518	XM_021867370.1	25.52	11.74	11.033	10.74	0.116656	0.805958	0.422083	0.240595	0.708214	0.245028	1.46561	1.83434e-22	2.45846e-24	NA	NA	XP_021723062.1|4.1e-198|uncharacterized protein LOC110690518 [Chenopodium quinoa]	NA
LOC110690528	XM_021867386.1,BGI_novel_T007882,BGI_novel_T007881	3.843	2.176	2.77	1.503	0.890246	0.224123	0.032163	0.685737	0.500079	0.114196	1.43009	0.000430694	5.53044e-05	MADS	K09264//MADS-box transcription factor, plant;K09264//MADS-box transcription factor, plant;K09264//MADS-box transcription factor, plant	XP_021723078.1|8.0e-162|agamous-like MADS-box protein AGL27 [Chenopodium quinoa]	GO:0010628//positive regulation of gene expression;GO:0048518//positive regulation of biological process;GO:0010604//positive regulation of macromolecule metabolic process;GO:0045935//positive regulation of nucleobase-containing compound metabolic process;GO:0006355//regulation of transcription, DNA-templated;GO:0051254//positive regulation of RNA metabolic process;GO:0080090//regulation of prima…
LOC110690537	XM_021867396.1	24.92	22.926	21.926	13.06	0.822452	1.11054e-06	8.59383e-09	0.913149	5.73187e-07	6.69256e-09	1.15282	2.22819e-19	3.83197e-21	NA	K14489//arabidopsis histidine kinase 2/3/4 (cytokinin receptor) [EC:2.7.13.3]+ko04075//Plant hormone signal transduction	XP_021723088.1|0.0e+00|histidine kinase 3-like [Chenopodium quinoa]	GO:0016021//integral component of membrane;GO:0016020//membrane;GO:0031224//intrinsic component of membrane;GO:0110165//cellular anatomical entity;GO:0016772//transferase activity, transferring phosphorus-containing groups;GO:0000155//phosphorelay sensor kinase activity;GO:0140299//small molecule sensor activity;GO:0016301//kinase activity;GO:0016740//transferase activity;GO:0003824//catalytic ac…
LOC110690548	XM_021867409.1	4.263	3.78	5.566	2.393	1.12355	0.144556	0.0156852	0.715579	0.383111	0.070842	1.02058	0.0312712	0.00767894	NA	K18801//glucuronoxylan 4-O-methyltransferase [EC:2.1.1.112]	XP_021723101.1|6.0e-165|probable methyltransferase At1g27930 [Chenopodium quinoa]	GO:0044238//primary metabolic process;GO:0042546//cell wall biogenesis;GO:0044260//cellular macromolecule metabolic process;GO:0044036//cell wall macromolecule metabolic process;GO:1901576//organic substance biosynthetic process;GO:0071840//cellular component organization or biogenesis;GO:0005975//carbohydrate metabolic process;GO:0071554//cell wall organization or biogenesis;GO:0016051//carbohyd…
LOC110690556	XM_021867420.1	9.133	1.18	2.696	0.893	1.36212	0.118516	0.0114938	0.373046	0.919583	0.580007	2.9803	0.000280249	3.42843e-05	NA	NA	XP_021723112.1|4.6e-114|factor Xa inhibitor BuXI-like [Chenopodium quinoa]	NA
LOC110690571	BGI_novel_T007873,XM_021867434.1	11.503	4.506	5.66	4.106	0.470099	0.587255	0.192351	0.167895	0.919583	0.659853	1.65432	1.86743e-07	1.18337e-08	NA	K17545//serine/threonine-protein kinase ULK4 [EC:2.7.11.1];K09874//aquaporin NIP;K17545//serine/threonine-protein kinase ULK4 [EC:2.7.11.1];K14561//U3 small nucleolar ribonucleoprotein protein IMP4+ko03008//Ribosome biogenesis in eukaryotes;K03283//heat shock 70kDa protein 1/2/6/8+ko03040//Spliceosome+ko04144//Endocytosis+ko04141//Protein processing in endoplasmic reticulum;K03517//quinolinate sy…	XP_021723126.1|2.6e-157|uncharacterized protein LOC110690571 [Chenopodium quinoa]	NA
LOC110690582	BGI_novel_T007883,XM_021867443.1,BGI_novel_T007884,BGI_novel_T007885	1.92	1.1	1.393	0.663	0.574342	0.546204	0.165505	0.512254	0.630026	0.184637	1.33222	0.00319866	0.000536636	NA	K19730//autophagy-related protein 101+ko04136//Autophagy - other;K19730//autophagy-related protein 101+ko04136//Autophagy - other;K19730//autophagy-related protein 101+ko04136//Autophagy - other;K19730//autophagy-related protein 101+ko04136//Autophagy - other	XP_021723135.1|4.9e-83|autophagy-related protein 101-like [Chenopodium quinoa]	GO:0044237//cellular metabolic process;GO:0008152//metabolic process;GO:0044248//cellular catabolic process;GO:0009056//catabolic process;GO:0006914//autophagy;GO:0061919//process utilizing autophagic mechanism;GO:0009987//cellular process;
LOC110690610	XM_021867462.1,BGI_novel_T007888,XM_021867461.1	55.973	41.81	50.3	29.95	0.769283	0.388464	0.0853646	0.615626	0.274646	0.0404849	1.20675	1.60875e-05	1.46044e-06	NA	K15503//serine/threonine-protein phosphatase 6 regulatory ankyrin repeat subunit B;K21952//CASK-interacting protein;K21435//ankyrin repeat domain-containing protein 6;K15503//serine/threonine-protein phosphatase 6 regulatory ankyrin repeat subunit B;K21952//CASK-interacting protein;K21435//ankyrin repeat domain-containing protein 6;K15503//serine/threonine-protein phosphatase 6 regulatory ankyrin…	XP_021723153.1|1.0e-243|ankyrin repeat-containing protein At2g01680-like isoform X1 [Chenopodium quinoa]	NA
LOC110690623	XM_021867471.1,BGI_novel_T007891	20.643	4.486	6.763	2.6	1.32804	0.0694084	0.00515778	0.875277	0.015738	0.000814672	3.09722	2.67437e-11	9.85393e-13	NA	NA	XP_021723163.1|5.3e-286|uncharacterized protein LOC110690623 [Chenopodium quinoa]	NA
LOC110690653	XM_021867508.1	4.28	1.52	3.473	1.806	0.846034	0.406615	0.0928721	-0.102358	0.961978	0.832419	1.38157	0.0113644	0.00232706	NA	K01206//alpha-L-fucosidase [EC:3.2.1.51]+ko00511//Other glycan degradation	XP_021723200.1|2.7e-223|acetylajmalan esterase-like [Chenopodium quinoa]	NA
LOC110690671	XM_021867527.1	466.743	256.23	274.836	174.073	0.648681	0.460074	0.11827	0.594734	0.6696	0.213211	1.56287	0.00124351	0.000182922	NA	NA	XP_021723219.1|8.8e-61|non-specific lipid-transfer protein-like [Chenopodium quinoa]	GO:0010876//lipid localization;GO:0006810//transport;GO:0071702//organic substance transport;GO:0051179//localization;GO:0051234//establishment of localization;GO:0033036//macromolecule localization;GO:0006869//lipid transport;GO:0005488//binding;GO:0008289//lipid binding;
LOC110690672	XM_021867528.1	1105.21	517.393	664.826	524.21	0.406961	0.611617	0.209351	0.0912722	0.952004	0.791878	1.27036	0.000107171	1.17558e-05	NA	NA	XP_021723220.1|1.5e-62|non-specific lipid-transfer protein-like [Chenopodium quinoa]	GO:0071702//organic substance transport;GO:0010876//lipid localization;GO:0051234//establishment of localization;GO:0006869//lipid transport;GO:0033036//macromolecule localization;GO:0006810//transport;GO:0051179//localization;GO:0005488//binding;GO:0008289//lipid binding;
LOC110690674	XM_021867531.1	6.763	1.076	1.583	0.396	1.41469	0.238721	0.0357028	1.03157	0.546159	0.136692	3.70316	1.01453e-06	7.19284e-08	NA	NA	XP_021723223.1|9.8e-62|non-specific lipid-transfer protein-like [Chenopodium quinoa]	NA
LOC110690711	XM_021867585.1	9.086	5.726	6.6	5.223	0.396066	0.441611	0.109058	0.241259	0.697948	0.235226	1.01555	1.98069e-06	1.48624e-07	NA	K01859//chalcone isomerase [EC:5.5.1.6]+ko01100//Metabolic pathways+ko01110//Biosynthesis of secondary metabolites+ko00941//Flavonoid biosynthesis;K04733//interleukin-1 receptor-associated kinase 4 [EC:2.7.11.1];K09597//signal peptide peptidase-like 2B [EC:3.4.23.-]	XP_021867473.1|0.0e+00|vacuolar-sorting receptor 1-like [Spinacia oleracea]	GO:0016021//integral component of membrane;GO:0031224//intrinsic component of membrane;GO:0110165//cellular anatomical entity;GO:0016020//membrane;GO:0005509//calcium ion binding;GO:0046872//metal ion binding;GO:0005488//binding;GO:0043169//cation binding;GO:0043167//ion binding;
LOC110690718	XM_021867591.1	119.833	36.116	44.553	28.426	0.701417	0.150683	0.0167287	0.443984	0.521779	0.124237	2.26103	5.24028e-15	1.31942e-16	WRKY	K13459//disease resistance protein RPS2+ko04626//Plant-pathogen interaction	XP_021723283.1|2.6e-201|probable WRKY transcription factor 30 [Chenopodium quinoa]	GO:0043231//intracellular membrane-bounded organelle;GO:0110165//cellular anatomical entity;GO:0005622//intracellular;GO:0043227//membrane-bounded organelle;GO:0005634//nucleus;GO:0043226//organelle;GO:0043229//intracellular organelle;GO:0005488//binding;GO:0140110//transcription regulator activity;GO:0003676//nucleic acid binding;GO:0003677//DNA binding;GO:0003700//DNA-binding transcription fact…
LOC110690724	XM_021867599.1,XM_021867602.1,BGI_novel_T007920,BGI_novel_T007921,XM_021867600.1,XM_021867598.1,BGI_novel_T007922,XM_021867601.1	2.93	0.93	0.936	0.763	0.355288	0.65872	0.249072	0.371799	0.797025	0.331136	2.10587	3.74183e-12	1.26014e-13	NA	NA	XP_021723293.1|6.2e-253|uncharacterized protein LOC110690724 isoform X2 [Chenopodium quinoa]	NA
LOC110690732	XM_021867612.1	69.123	36.286	38.576	23.236	0.800233	0.0110766	0.000436061	0.751599	0.000371996	9.5018e-06	1.76615	7.9694e-11	3.11441e-12	NA	K03671//thioredoxin 1	XP_021865623.1|1.5e-79|thioredoxin H-type-like isoform X1 [Spinacia oleracea]	GO:0045454//cell redox homeostasis;GO:0065008//regulation of biological quality;GO:0009987//cellular process;GO:0065007//biological regulation;GO:0050789//regulation of biological process;GO:0050794//regulation of cellular process;GO:0019725//cellular homeostasis;GO:0042592//homeostatic process;
LOC110690747	BGI_novel_T007928,BGI_novel_T007929,XM_021867639.1,XM_021867638.1	13.143	5.886	7.563	5.316	0.575005	0.240146	0.0360752	0.240263	0.835945	0.382771	1.56251	3.04633e-08	1.69457e-09	NA	NA	XP_021723331.1|1.6e-223|uncharacterized protein LOC110690747 isoform X2 [Chenopodium quinoa]	NA
LOC110690757	XM_021867650.1	35.76	17.26	19.923	13.053	0.624083	0.464078	0.120524	0.479087	0.666648	0.211254	1.62471	8.587e-05	9.18459e-06	NA	K13448//calcium-binding protein CML+ko04626//Plant-pathogen interaction	XP_021723342.1|3.5e-126|probable calcium-binding protein CML43 [Chenopodium quinoa]	NA
LOC110690801	XM_021867688.1	10.566	3.456	4.926	2.86	0.795255	0.202471	0.0270683	0.356025	0.863032	0.433864	2.03803	1.6542e-06	1.22045e-07	NA	NA	XP_021723380.1|3.1e-113|uncharacterized protein LOC110690801 [Chenopodium quinoa]	GO:0016020//membrane;GO:0016021//integral component of membrane;GO:0031224//intrinsic component of membrane;GO:0110165//cellular anatomical entity;
LOC110690810	BGI_novel_T007896,XM_021867695.1	0.643	0.24	0.51	0.3	0.759709	0.378138	0.0807217	-0.222342	0.92476	0.705583	1.2721	0.0232127	0.00539906	NA	K01206//alpha-L-fucosidase [EC:3.2.1.51]+ko00511//Other glycan degradation;K01206//alpha-L-fucosidase [EC:3.2.1.51]+ko00511//Other glycan degradation	XP_021723387.1|5.1e-205|GDSL esterase/lipase At1g31550-like [Chenopodium quinoa]	NA
LOC110690832	XM_021867713.1	66.046	53.826	55.283	33.506	0.786352	0.00161395	3.94385e-05	0.783509	0.0061248	0.000259354	1.19578	4.6776e-10	2.01464e-11	NA	K00327//NADPH-ferrihemoprotein reductase [EC:1.6.2.4]	XP_021859658.1|0.0e+00|NADPH--cytochrome P450 reductase [Spinacia oleracea]	GO:0110165//cellular anatomical entity;GO:0005829//cytosol;GO:0016021//integral component of membrane;GO:0043226//organelle;GO:0005737//cytoplasm;GO:0031090//organelle membrane;GO:0043227//membrane-bounded organelle;GO:0031224//intrinsic component of membrane;GO:0016020//membrane;GO:0005622//intracellular;GO:0012505//endomembrane system;GO:0005789//endoplasmic reticulum membrane;GO:0042175//nucle…
LOC110690878	XM_021867775.1	7.55	4.91	4.93	3.7	0.459305	0.665191	0.254186	0.483323	0.694855	0.232516	1.20636	0.0123182	0.00255923	NA	K22285//oxysterol-binding protein-related protein 8	XP_021723467.1|8.8e-226|oxysterol-binding protein-related protein 4C-like [Chenopodium quinoa]	NA
LOC110690880	XM_021867780.1	47.056	23.003	25.033	16.393	0.686866	0.0272406	0.00141248	0.593807	0.0654786	0.00513082	1.72219	2.64303e-08	1.45705e-09	NA	K18469//TBC1 domain family member 5	XP_021723472.1|0.0e+00|uncharacterized protein LOC110690880 [Chenopodium quinoa]	NA
LOC110690889	XM_021867792.1	45.05	30.903	35.13	24.946	0.567307	0.0972332	0.00848022	0.415631	0.307527	0.048808	1.06796	3.88585e-06	3.08687e-07	NA	K17535//serine/threonine-protein kinase TNNI3K [EC:2.7.11.1]	XP_021723484.1|7.3e-279|serine/threonine-protein kinase STY8-like [Chenopodium quinoa]	GO:0043168//anion binding;GO:0030554//adenyl nucleotide binding;GO:1901265//nucleoside phosphate binding;GO:0005524//ATP binding;GO:0000166//nucleotide binding;GO:0032553//ribonucleotide binding;GO:0097367//carbohydrate derivative binding;GO:0032555//purine ribonucleotide binding;GO:0097159//organic cyclic compound binding;GO:0004672//protein kinase activity;GO:0036094//small molecule binding;GO:…
LOC110690891	XM_021867791.1	32.196	13.486	13.616	8.04	0.82834	0.0102531	0.000392021	0.841773	0.0120266	0.000583822	2.20206	6.90704e-21	1.03356e-22	NA	K23048//RING finger protein unkempt	XP_021723483.1|1.1e-217|zinc finger CCCH domain-containing protein 23-like [Chenopodium quinoa]	GO:0043169//cation binding;GO:0005488//binding;GO:0046872//metal ion binding;GO:0043167//ion binding;
LOC110690893	XM_021867795.1,BGI_novel_T007954,XM_021867794.1	9.456	4.556	5.866	3.853	0.686089	0.000305156	5.56099e-06	0.352082	0.595453	0.163269	1.50782	3.57985e-09	1.72584e-10	NA	K02184//formin 2;K02184//formin 2;K02184//formin 2	XP_021725013.1|0.0e+00|uncharacterized protein LOC110692314 isoform X1 [Chenopodium quinoa]	GO:0110165//cellular anatomical entity;GO:0031224//intrinsic component of membrane;GO:0016020//membrane;GO:0016021//integral component of membrane;
LOC110690897	XM_021867799.1	50.85	52.766	44.026	28.15	0.710032	0.0433094	0.00259829	0.999814	0.00039233	1.00641e-05	1.07352	1.24278e-05	1.10476e-06	NA	K00850//6-phosphofructokinase 1 [EC:2.7.1.11]+ko00010//Glycolysis / Gluconeogenesis+ko00030//Pentose phosphate pathway+ko01230//Biosynthesis of amino acids+ko03018//RNA degradation+ko01100//Metabolic pathways+ko00052//Galactose metabolism+ko00051//Fructose and mannose metabolism+ko01110//Biosynthesis of secondary metabolites+ko01200//Carbon metabolism	XP_021723491.1|6.9e-295|ATP-dependent 6-phosphofructokinase 6-like [Chenopodium quinoa]	GO:1901135//carbohydrate derivative metabolic process;GO:0071704//organic substance metabolic process;GO:0008152//metabolic process;GO:0044237//cellular metabolic process;GO:0009987//cellular process;GO:0006002//fructose 6-phosphate metabolic process;GO:0006796//phosphate-containing compound metabolic process;GO:0019637//organophosphate metabolic process;GO:0006793//phosphorus metabolic process;G…
LOC110690898	XM_021867811.1,XM_021867802.1	2.31	1.166	1.413	1.35	0.186386	0.898091	0.590254	-0.0896205	0.948743	0.780257	1.01668	0.00286723	0.000473074	NA	K15030//translation initiation factor 3 subunit M;K15030//translation initiation factor 3 subunit M	XP_021723494.1|4.2e-238|F-box protein CPR30-like [Chenopodium quinoa]	NA
LOC110690922	XM_021867828.1	14.48	4.85	9.366	6.48	0.577269	0.510613	0.143433	-0.280764	0.866288	0.439706	1.34238	0.00734251	0.00140032	NA	NA	XP_021723520.1|1.7e-99|uncharacterized protein LOC110690922 [Chenopodium quinoa]	NA
LOC110690975	XM_021867898.1	27.263	15.09	16.756	10.19	0.789048	0.0777825	0.00617852	0.670836	0.00313999	0.000117211	1.58639	3.4898e-05	3.41177e-06	NA	K05747//Wiskott-Aldrich syndrome protein+ko04144//Endocytosis	XP_021723590.1|1.1e-252|ninja-family protein mc410-like [Chenopodium quinoa]	GO:0050896//response to stimulus;GO:0009987//cellular process;GO:0065007//biological regulation;GO:0050789//regulation of biological process;GO:0050794//regulation of cellular process;GO:0007154//cell communication;GO:0007165//signal transduction;GO:0023052//signaling;GO:0051716//cellular response to stimulus;
LOC110690994	XM_021867921.1,XM_021867920.1,XM_021867922.1	10.836	7.403	7.773	4.323	0.916129	0.0021215	5.5078e-05	0.875465	0.00372209	0.000143016	1.53976	1.37129e-09	6.23625e-11	NA	K08145//MFS transporter, SP family, solute carrier family 2 (facilitated glucose transporter), member 8;K08145//MFS transporter, SP family, solute carrier family 2 (facilitated glucose transporter), member 8;K08145//MFS transporter, SP family, solute carrier family 2 (facilitated glucose transporter), member 8	XP_021723612.1|2.6e-273|probable plastidic glucose transporter 2 [Chenopodium quinoa]	NA
LOC110691027	XM_021867963.1	23.47	14.79	10.356	12.833	-0.217977	0.7251	0.315251	0.313053	0.594883	0.162726	1.07469	1.44067e-05	1.2966e-06	NA	K06694//26S proteasome non-ATPase regulatory subunit 10	XP_021723655.1|2.4e-276|uncharacterized protein LOC110691027 [Chenopodium quinoa]	GO:0005622//intracellular;GO:1905368//peptidase complex;GO:0032991//protein-containing complex;GO:0000502//proteasome complex;GO:1905369//endopeptidase complex;GO:1902494//catalytic complex;GO:0032553//ribonucleotide binding;GO:0005524//ATP binding;GO:0097367//carbohydrate derivative binding;GO:0043167//ion binding;GO:0043168//anion binding;GO:1901265//nucleoside phosphate binding;GO:0097159//org…
LOC110691051	XM_021867986.1	93.043	29.436	36.15	34.526	0.161091	0.913484	0.716066	-0.105225	0.936869	0.73956	1.62155	4.77879e-09	2.34426e-10	NA	K17471//sulfate transporter 3	XP_021861731.1|0.0e+00|probable sulfate transporter 3.5 [Spinacia oleracea]	GO:0016021//integral component of membrane;GO:0110165//cellular anatomical entity;GO:0016020//membrane;GO:0031224//intrinsic component of membrane;GO:0015116//sulfate transmembrane transporter activity;GO:0015291//secondary active transmembrane transporter activity;GO:0022804//active transmembrane transporter activity;GO:0015075//ion transmembrane transporter activity;GO:0015318//inorganic molecu…
LOC110691076	BGI_novel_T007960,XM_021868011.1	2.693	0.626	0.796	0.506	0.570579	0.750618	0.342949	0.347772	0.919583	0.54022	2.48778	5.71982e-06	4.71865e-07	NA	K13065//shikimate O-hydroxycinnamoyltransferase [EC:2.3.1.133]+ko01100//Metabolic pathways+ko01110//Biosynthesis of secondary metabolites+ko00940//Phenylpropanoid biosynthesis+ko00941//Flavonoid biosynthesis+ko00945//Stilbenoid, diarylheptanoid and gingerol biosynthesis;K13065//shikimate O-hydroxycinnamoyltransferase [EC:2.3.1.133]+ko01100//Metabolic pathways+ko01110//Biosynthesis of secondary me…	XP_021723703.1|2.1e-279|vinorine synthase-like [Chenopodium quinoa]	NA
LOC110691103	XM_021868037.1	5.63	1.233	1	0.44	1.01433	0.37106	0.0782643	1.31045	0.181479	0.0217541	3.69306	3.22386e-14	8.79532e-16	MYB	K09422//transcription factor MYB, plant	XP_021723729.1|1.5e-146|transcription factor MYB87-like [Chenopodium quinoa]	NA
LOC110691116	XM_021868047.1	6.846	4.493	6.93	3.59	0.928011	0.243359	0.0369588	0.42017	0.735834	0.269321	1.12139	0.0121433	0.00251841	OFP	K01870//isoleucyl-tRNA synthetase [EC:6.1.1.5]+ko00970//Aminoacyl-tRNA biosynthesis;K14834//nucleolar complex protein 3	XP_021723739.1|6.7e-197|transcription repressor OFP8-like [Chenopodium quinoa]	GO:0009892//negative regulation of metabolic process;GO:1903506//regulation of nucleic acid-templated transcription;GO:0050794//regulation of cellular process;GO:0019219//regulation of nucleobase-containing compound metabolic process;GO:0050789//regulation of biological process;GO:0051253//negative regulation of RNA metabolic process;GO:0048523//negative regulation of cellular process;GO:0031323/…
LOC110691177	XM_021868098.1,XM_021868097.1	7.203	4.873	4.766	4.143	0.291768	0.78519	0.385943	0.338253	0.573952	0.1509	1.01328	3.65222e-06	2.89335e-07	NA	NA	XP_021723789.1|7.9e-118|uncharacterized protein LOC110691177 isoform X1 [Chenopodium quinoa]	NA
LOC110691207	XM_021868118.1	110.936	72.77	72.32	44.92	0.745836	0.125035	0.0125267	0.7844	0.0608053	0.0046333	1.4948	3.35521e-05	3.2671e-06	C2C2-CO-like	K12135//zinc finger protein CONSTANS+ko04712//Circadian rhythm - plant	XP_021723810.1|5.6e-220|zinc finger protein CONSTANS-LIKE 4-like [Chenopodium quinoa]	GO:0005622//intracellular;GO:0043229//intracellular organelle;GO:0005634//nucleus;GO:0043231//intracellular membrane-bounded organelle;GO:0110165//cellular anatomical entity;GO:0043226//organelle;GO:0043227//membrane-bounded organelle;GO:0046872//metal ion binding;GO:0008270//zinc ion binding;GO:0046914//transition metal ion binding;GO:0043169//cation binding;GO:0043167//ion binding;GO:0005488//b…
LOC110691220	XM_021868130.1,BGI_novel_T008012	6.266	4.153	4.883	3.5	0.543754	0.0952523	0.00821194	0.325841	0.688068	0.228311	1.043	2.8612e-06	2.21829e-07	NA	K13863//solute carrier family 7 (cationic amino acid transporter), member 1;K03294//basic amino acid/polyamine antiporter, APA family	XP_010681723.1|1.8e-277|PREDICTED: amino-acid permease BAT1 homolog isoform X1 [Beta vulgaris subsp. vulgaris]	GO:0051234//establishment of localization;GO:0071702//organic substance transport;GO:0071705//nitrogen compound transport;GO:0006811//ion transport;GO:0015711//organic anion transport;GO:0046942//carboxylic acid transport;GO:0051179//localization;GO:0006820//anion transport;GO:0006810//transport;GO:0015849//organic acid transport;GO:0006865//amino acid transport;GO:0016021//integral component of …
LOC110691235	XM_021868149.1,XM_021868147.1,XM_021868148.1	7.333	1.376	0.943	0.256	1.21426	0.120289	0.0117575	1.47782	0.0505609	0.00363072	3.64793	3.97137e-11	1.49343e-12	NA	K19476//vacuolar protein sorting-associated protein IST1+ko04144//Endocytosis;K19476//vacuolar protein sorting-associated protein IST1+ko04144//Endocytosis;K19476//vacuolar protein sorting-associated protein IST1+ko04144//Endocytosis	XP_021723839.1|1.9e-243|uncharacterized protein LOC110691235 isoform X1 [Chenopodium quinoa]	NA
LOC110691242	XM_021868154.1	7.866	2.936	3.426	2.833	0.354875	0.441875	0.10918	0.166594	0.905669	0.51536	1.68151	3.11247e-13	9.43644e-15	NA	K03695//ATP-dependent Clp protease ATP-binding subunit ClpB	XP_021723846.1|0.0e+00|aluminum-activated malate transporter 4-like [Chenopodium quinoa]	GO:0015711//organic anion transport;GO:0006811//ion transport;GO:0006810//transport;GO:0046942//carboxylic acid transport;GO:0015740//C4-dicarboxylate transport;GO:0051234//establishment of localization;GO:0006835//dicarboxylic acid transport;GO:0071702//organic substance transport;GO:0015743//malate transport;GO:0006820//anion transport;GO:0015849//organic acid transport;GO:0051179//localization…
LOC110691255	XM_021868169.1	9.143	4.453	4.56	3.693	0.377044	0.293584	0.0512488	0.376223	0.567782	0.147826	1.52217	7.64173e-16	1.76165e-17	NA	NA	XP_021723861.1|3.2e-206|uncharacterized protein LOC110691255 [Chenopodium quinoa]	NA
LOC110691321	XM_021868265.1	46.373	24.79	27.306	18.94	0.580397	0.438015	0.107431	0.514677	0.541267	0.134365	1.49331	3.45435e-05	3.37412e-06	NA	K13993//HSP20 family protein+ko04141//Protein processing in endoplasmic reticulum	XP_021723957.1|4.3e-58|17.9 kDa class I heat shock protein-like [Chenopodium quinoa]	NA
LOC110691327	XM_021868246.1	46.536	4.483	2.363	1.36	0.823664	0.386756	0.0847363	1.49368	0.105357	0.00982124	3.93953	5.51767e-05	5.65636e-06	NA	NA	XP_021723157.1|1.8e-106|uncharacterized protein LOC110690616 [Chenopodium quinoa]	NA
LOC110691364	XM_021868282.1	0.266	0.09	0.033	0.013	0.319914	0.898091	0.58538	1.04824	0.555322	0.14182	2.90919	0.00850053	0.00165896	NA	K13065//shikimate O-hydroxycinnamoyltransferase [EC:2.3.1.133]+ko01100//Metabolic pathways+ko01110//Biosynthesis of secondary metabolites+ko00940//Phenylpropanoid biosynthesis+ko00941//Flavonoid biosynthesis+ko00945//Stilbenoid, diarylheptanoid and gingerol biosynthesis	XP_021723974.1|4.8e-172|shikimate O-hydroxycinnamoyltransferase-like [Chenopodium quinoa]	NA
LOC110691402	XM_021868329.1	9.43	4.516	5.273	4.533	0.305727	0.767797	0.361095	0.111131	0.92476	0.70549	1.25079	0.0001915	2.24305e-05	NA	K00549//5-methyltetrahydropteroyltriglutamate--homocysteine methyltransferase [EC:2.1.1.14]+ko01230//Biosynthesis of amino acids+ko00450//Selenocompound metabolism+ko01100//Metabolic pathways+ko01110//Biosynthesis of secondary metabolites+ko00270//Cysteine and methionine metabolism;K04733//interleukin-1 receptor-associated kinase 4 [EC:2.7.11.1];K12486//stromal membrane-associated protein+ko04144…	XP_021724021.1|0.0e+00|FT-interacting protein 1-like [Chenopodium quinoa]	GO:0007275//multicellular organism development;GO:0009416//response to light stimulus;GO:2000241//regulation of reproductive process;GO:0050793//regulation of developmental process;GO:0051239//regulation of multicellular organismal process;GO:0009314//response to radiation;GO:0048608//reproductive structure development;GO:0048518//positive regulation of biological process;GO:0051094//positive reg…
LOC110691409	XM_021868335.1	115.756	32.806	58.183	26.353	0.995703	0.380275	0.0819569	0.376853	0.885977	0.47539	2.17346	0.000212747	2.52744e-05	NA	K13420//LRR receptor-like serine/threonine-protein kinase FLS2 [EC:2.7.11.1]+ko04016//MAPK signaling pathway - plant+ko04626//Plant-pathogen interaction	XP_021724027.1|1.0e-209|polygalacturonase inhibitor-like [Chenopodium quinoa]	NA
LOC110691466	XM_021868406.1	11.686	7.46	7.583	6.596	0.281503	0.330702	0.0633939	0.287055	0.333633	0.05605	1.04361	1.05272e-10	4.16876e-12	C3H	K23048//RING finger protein unkempt	XP_021724098.1|0.0e+00|zinc finger CCCH domain-containing protein 30-like [Chenopodium quinoa]	GO:0043167//ion binding;GO:0005488//binding;GO:0043169//cation binding;GO:0046872//metal ion binding;
LOC110691489	XM_021868427.1	6.156	4.413	3.163	2.953	0.188559	0.898091	0.613219	0.654417	0.357863	0.0628489	1.24707	0.0023335	0.000373372	C2H2	NA	XP_021724119.1|6.0e-171|zinc finger AN1 and C2H2 domain-containing stress-associated protein 11-like [Chenopodium quinoa]	GO:0003676//nucleic acid binding;GO:0043169//cation binding;GO:0046914//transition metal ion binding;GO:0005488//binding;GO:0043167//ion binding;GO:0008270//zinc ion binding;GO:1901363//heterocyclic compound binding;GO:0046872//metal ion binding;GO:0097159//organic cyclic compound binding;
LOC110691516	XM_021868453.1,XM_021868454.1,BGI_novel_T008075	8.87	4.153	5.553	4.12	0.498832	0.376591	0.080219	0.129974	0.919583	0.565271	1.33072	7.78526e-08	4.63459e-09	NA	K05643//ATP-binding cassette, subfamily A (ABC1), member 3+ko02010//ABC transporters;K05643//ATP-binding cassette, subfamily A (ABC1), member 3+ko02010//ABC transporters;K05643//ATP-binding cassette, subfamily A (ABC1), member 3+ko02010//ABC transporters	XP_021724145.1|0.0e+00|ABC transporter A family member 1-like isoform X1 [Chenopodium quinoa]	GO:0031224//intrinsic component of membrane;GO:0110165//cellular anatomical entity;GO:0016020//membrane;GO:0016021//integral component of membrane;GO:0032555//purine ribonucleotide binding;GO:0016787//hydrolase activity;GO:0005488//binding;GO:0022857//transmembrane transporter activity;GO:0000166//nucleotide binding;GO:0036094//small molecule binding;GO:0017076//purine nucleotide binding;GO:00305…
LOC110691524	XM_021868461.1	262.26	170.826	253.88	149.27	0.807389	0.104802	0.00946705	0.306087	0.825132	0.368471	1.01655	0.0298265	0.00726339	NA	K04733//interleukin-1 receptor-associated kinase 4 [EC:2.7.11.1]	XP_021724153.1|5.6e-99|horcolin-like [Chenopodium quinoa]	NA
LOC110691557	XM_021868495.1,XM_021868494.1	2.87	2.84	2.67	1.566	0.794235	0.133205	0.0137459	0.904648	0.154832	0.0171515	1.06164	0.00438299	0.000771926	NA	NA	XP_021724186.1|0.0e+00|uncharacterized protein LOC110691557 [Chenopodium quinoa]	NA
LOC110691619	BGI_novel_T008081,XM_021868575.1	1.013	0.303	0.436	0.176	0.685473	0.746909	0.339105	0.412867	0.919583	0.570301	2.08312	0.0454617	0.0120598	NA	K19893//glucan endo-1,3-beta-glucosidase 5/6 [EC:3.2.1.39]+ko00500//Starch and sucrose metabolism;K19893//glucan endo-1,3-beta-glucosidase 5/6 [EC:3.2.1.39]+ko00500//Starch and sucrose metabolism	XP_021724267.1|4.0e-107|glucan endo-1,3-beta-glucosidase, acidic-like [Chenopodium quinoa]	GO:0071704//organic substance metabolic process;GO:0008152//metabolic process;GO:0005975//carbohydrate metabolic process;GO:0044238//primary metabolic process;GO:0016021//integral component of membrane;GO:0031224//intrinsic component of membrane;GO:0110165//cellular anatomical entity;GO:0016020//membrane;GO:0016787//hydrolase activity;GO:0003824//catalytic activity;GO:0016798//hydrolase activity,…
LOC110691654	XM_021868607.1	14.266	4.193	5.93	1.846	1.48112	0.0827688	0.00673337	1.11606	0.255311	0.0362589	3.01825	3.19126e-10	1.34541e-11	NA	NA	XP_021724299.1|5.8e-79|uncharacterized protein LOC110691654 [Chenopodium quinoa]	NA
LOC110691686	XM_021868624.1	4.713	1.803	2.256	1.56	0.512974	0.759243	0.351923	0.273756	0.919583	0.638431	1.68291	0.014319	0.00305284	NA	K08235//xyloglucan:xyloglucosyl transferase [EC:2.4.1.207]	XP_021724316.1|4.6e-117|xyloglucan endotransglucosylase/hydrolase protein 31-like, partial [Chenopodium quinoa]	GO:0010411//xyloglucan metabolic process;GO:0045229//external encapsulating structure organization;GO:0010383//cell wall polysaccharide metabolic process;GO:0044260//cellular macromolecule metabolic process;GO:0006073//cellular glucan metabolic process;GO:0044085//cellular component biogenesis;GO:0071554//cell wall organization or biogenesis;GO:0044237//cellular metabolic process;GO:0008152//meta…
LOC110691732	XM_021868664.1	5.356	2.493	3.37	2.73	0.37664	0.365253	0.0761001	-0.0184798	0.991749	0.930375	1.18146	5.29334e-05	5.41491e-06	NA	K01206//alpha-L-fucosidase [EC:3.2.1.51]+ko00511//Other glycan degradation	XP_021724356.1|0.0e+00|LOW QUALITY PROTEIN: alpha-L-fucosidase 1-like [Chenopodium quinoa]	GO:0044238//primary metabolic process;GO:0008152//metabolic process;GO:0071704//organic substance metabolic process;GO:0005975//carbohydrate metabolic process;GO:0004553//hydrolase activity, hydrolyzing O-glycosyl compounds;GO:0016787//hydrolase activity;GO:0003824//catalytic activity;GO:0015928//fucosidase activity;GO:0004560//alpha-L-fucosidase activity;GO:0016798//hydrolase activity, acting on…
LOC110691778	XM_021868726.1	28.416	13.41	20.506	13.016	0.706651	0.128049	0.0129459	0.150805	0.919583	0.569774	1.32786	4.56248e-07	3.07325e-08	NA	K13071//pheophorbide a oxygenase [EC:1.14.15.17]+ko00860//Porphyrin and chlorophyll metabolism+ko01110//Biosynthesis of secondary metabolites	XP_021724418.1|0.0e+00|pheophorbide a oxygenase, chloroplastic-like [Chenopodium quinoa]	GO:0042440//pigment metabolic process;GO:0009908//flower development;GO:0042742//defense response to bacterium;GO:0048608//reproductive structure development;GO:0071704//organic substance metabolic process;GO:0033015//tetrapyrrole catabolic process;GO:0090567//reproductive shoot system development;GO:0034641//cellular nitrogen compound metabolic process;GO:0009816//defense response to bacterium, …
LOC110691823	XM_021868779.1	17.946	8.966	5.623	9.6	-0.650438	0.409114	0.0940316	0.011868	0.998482	0.97551	1.07571	0.0134739	0.00284169	NA	K19891//glucan endo-1,3-beta-glucosidase 1/2/3 [EC:3.2.1.39]+ko00500//Starch and sucrose metabolism;K19892//glucan endo-1,3-beta-glucosidase 4 [EC:3.2.1.39]+ko00500//Starch and sucrose metabolism	XP_021724471.1|1.6e-70|glucan endo-1,3-beta-glucosidase 4-like [Chenopodium quinoa]	NA
LOC110691855	XM_021868822.1	8.546	5.266	7.003	4.033	0.851499	0.0271225	0.00140434	0.487579	0.209402	0.0270003	1.2991	1.49692e-10	6.04143e-12	NA	K13118//protein DGCR14	XP_021724514.1|4.6e-293|protein DGCR14-like [Chenopodium quinoa]	NA
LOC110691903	XM_021868880.1,XM_021868878.1,XM_021868879.1	19.21	13.99	13.353	10.453	0.411278	0.723091	0.31143	0.492608	0.674391	0.216912	1.06512	0.0355657	0.00897029	NA	K18045//tyrosine-protein phosphatase SIW14 [EC:3.1.3.48];K18045//tyrosine-protein phosphatase SIW14 [EC:3.1.3.48];K18045//tyrosine-protein phosphatase SIW14 [EC:3.1.3.48]	XP_021724570.1|6.3e-164|probable tyrosine-protein phosphatase At1g05000 isoform X1 [Chenopodium quinoa]	GO:0140096//catalytic activity, acting on a protein;GO:0004725//protein tyrosine phosphatase activity;GO:0016787//hydrolase activity;GO:0042578//phosphoric ester hydrolase activity;GO:0016788//hydrolase activity, acting on ester bonds;GO:0004721//phosphoprotein phosphatase activity;GO:0016791//phosphatase activity;GO:0003824//catalytic activity;
LOC110691910	XM_021868889.1	18.54	5.31	5.733	2.873	1.01618	0.0766761	0.00602672	0.936473	0.117458	0.0114862	2.8372	1.11033e-15	2.61985e-17	NA	K22683//aspartyl protease family protein [EC:3.4.23.-]	XP_021724581.1|0.0e+00|aspartic proteinase nepenthesin-2-like [Chenopodium quinoa]	GO:0140096//catalytic activity, acting on a protein;GO:0004190//aspartic-type endopeptidase activity;GO:0070001//aspartic-type peptidase activity;GO:0008233//peptidase activity;GO:0070011//peptidase activity, acting on L-amino acid peptides;GO:0003824//catalytic activity;GO:0004175//endopeptidase activity;GO:0016787//hydrolase activity;
LOC110691922	XM_021868906.1	9.773	2.15	2.223	1.123	1.00861	0.0702895	0.0052608	0.949645	0.265386	0.0383699	3.23138	1.00855e-15	2.36876e-17	NA	K05389//potassium channel subfamily K, other eukaryote	XP_021724598.1|6.0e-248|two-pore potassium channel 5-like [Chenopodium quinoa]	GO:0110165//cellular anatomical entity;GO:0016020//membrane;GO:0031224//intrinsic component of membrane;GO:0016021//integral component of membrane;GO:0008324//cation transmembrane transporter activity;GO:0005216//ion channel activity;GO:0015077//monovalent inorganic cation transmembrane transporter activity;GO:0022803//passive transmembrane transporter activity;GO:0005261//cation channel activity…
LOC110691981	XM_021868967.1	69.36	27.74	50.376	30.513	0.772967	0.20856	0.0285005	-0.0139146	0.998482	0.96483	1.38785	0.000117983	1.30902e-05	NA	NA	XP_021724659.1|7.6e-151|probable strigolactone esterase DAD2 [Chenopodium quinoa]	NA
LOC110691998	XM_021868988.1,XM_021868989.1,XM_021868987.1	4.923	1.82	2.326	1.24	0.957477	0.0233742	0.0011561	0.643151	0.200458	0.0253553	2.14564	1.15488e-09	5.19695e-11	NA	K14306//nuclear pore complex protein Nup62+ko03013//RNA transport;K17046//protein DEK;K14572//midasin+ko03008//Ribosome biogenesis in eukaryotes;K14306//nuclear pore complex protein Nup62+ko03013//RNA transport;K17046//protein DEK;K14306//nuclear pore complex protein Nup62+ko03013//RNA transport;K17046//protein DEK;K14572//midasin+ko03008//Ribosome biogenesis in eukaryotes	XP_021724679.1|0.0e+00|uncharacterized protein LOC110691998 isoform X1 [Chenopodium quinoa]	NA
LOC110692011	XM_021869003.1	15.73	8.97	11.083	8.27	0.498577	0.0104963	0.000404064	0.229309	0.612292	0.173538	1.14842	1.73868e-13	5.13561e-15	NA	NA	XP_021724695.1|3.5e-229|uncharacterized protein LOC110692011 [Chenopodium quinoa]	NA
LOC110692084	XM_021869068.1	2.36	0.033	0.506	0.053	1.77003	0.125675	0.0126182	-0.157093	0.948003	0.777696	4.60159	1.06542e-08	5.4991e-10	NA	K17604//zinc finger SWIM domain-containing protein 3	XP_021724760.1|4.3e-188|uncharacterized protein LOC110692084 [Chenopodium quinoa]	NA
LOC110692105	XM_021869185.1,XM_021869122.1	3.553	0.206	0.32	0.07	0.858317	0.625305	0.220688	0.806451	0.736612	0.270106	4.09242	2.714e-05	2.59387e-06	Tify	K13464//jasmonate ZIM domain-containing protein+ko04075//Plant hormone signal transduction;K13464//jasmonate ZIM domain-containing protein+ko04075//Plant hormone signal transduction	XP_021724814.1|7.6e-77|protein TIFY 5A-like isoform X1 [Chenopodium quinoa]	NA
LOC110692140	XM_021869142.1	23.683	11.756	10.983	8.706	0.406849	0.24841	0.0382131	0.539198	0.114956	0.0111482	1.63387	8.53071e-08	5.10426e-09	NA	NA	XP_021724834.1|7.5e-43|uncharacterized protein LOC110692140 [Chenopodium quinoa]	GO:0110165//cellular anatomical entity;GO:0031224//intrinsic component of membrane;GO:0016021//integral component of membrane;GO:0016020//membrane;
LOC110692247	XM_021869240.1	86.256	70.53	72.4	45.38	0.751328	0.00029128	5.25732e-06	0.742221	0.00149919	4.89997e-05	1.14676	2.05979e-12	6.70053e-14	NA	K00327//NADPH-ferrihemoprotein reductase [EC:1.6.2.4]	XP_021859658.1|0.0e+00|NADPH--cytochrome P450 reductase [Spinacia oleracea]	GO:0043227//membrane-bounded organelle;GO:0005829//cytosol;GO:0031224//intrinsic component of membrane;GO:0005789//endoplasmic reticulum membrane;GO:0016020//membrane;GO:0005737//cytoplasm;GO:0110165//cellular anatomical entity;GO:0005622//intracellular;GO:0031090//organelle membrane;GO:0042175//nuclear outer membrane-endoplasmic reticulum membrane network;GO:0016021//integral component of membra…
LOC110692258	XM_021869257.1	37.146	19.68	15.536	15.826	0.0611269	0.958337	0.852176	0.42304	0.566719	0.147238	1.43797	2.34186e-06	1.78536e-07	NA	NA	XP_021724949.1|9.9e-143|uncharacterized protein LOC110692258 [Chenopodium quinoa]	NA
LOC110692274	XM_021869275.1	5.906	3.526	3.613	2.843	0.416258	0.432436	0.104726	0.416521	0.491349	0.110521	1.26517	9.49062e-06	8.2205e-07	NA	NA	XP_021724967.1|1.0e-282|uncharacterized protein LOC110692274 [Chenopodium quinoa]	NA
LOC110692295	XM_021869296.1,BGI_novel_T008268	5.466	3.27	2.933	2.403	0.350759	0.66158	0.251371	0.548523	0.370222	0.0663819	1.36577	3.28934e-05	3.19725e-06	NA	NA	XP_021724988.1|5.2e-136|uncharacterized protein LOC110692295 [Chenopodium quinoa]	NA
LOC110692303	XM_021869307.1	25.26	14.456	17.743	12.976	0.53704	0.22423	0.032188	0.270625	0.626983	0.182289	1.18145	1.24425e-06	8.95324e-08	NA	K18469//TBC1 domain family member 5	XP_021724999.1|0.0e+00|uncharacterized protein LOC110692303 [Chenopodium quinoa]	NA
LOC110692332	XM_021869344.1	2.173	0.876	0.776	0.283	0.946457	0.559327	0.173766	1.29226	0.288137	0.0437875	2.7363	0.000379431	4.80224e-05	NA	K20728//vegetative storage protein 2+ko04016//MAPK signaling pathway - plant;K02866//large subunit ribosomal protein L10e+ko03010//Ribosome	XP_021725036.1|3.0e-154|acid phosphatase 1-like [Chenopodium quinoa]	NA
LOC110692341	XM_021869350.1	25.42	16.856	19.863	11.093	0.837436	0.240134	0.036063	0.702459	0.0776497	0.00644685	1.39759	1.87862e-07	1.19127e-08	NA	K01183//chitinase [EC:3.2.1.14]+ko00520//Amino sugar and nucleotide sugar metabolism+ko01100//Metabolic pathways	XP_021725042.1|8.3e-236|acidic mammalian chitinase-like [Chenopodium quinoa]	NA
LOC110692352	XM_021869362.1	0.883	0	0	0	NA	NA	NA	NA	NA	NA	4.30763	2.4359e-05	2.29956e-06	NA	K17991//peroxygenase [EC:1.11.2.3]+ko00073//Cutin, suberine and wax biosynthesis	XP_021725054.1|4.0e-145|peroxygenase-like [Chenopodium quinoa]	NA
LOC110692414	XM_021869410.1	19.496	5.466	6.33	3.423	0.951134	0.000114739	1.7883e-06	0.773793	0.0254583	0.00148905	2.70694	6.39649e-35	4.16158e-37	NA	K01054//acylglycerol lipase [EC:3.1.1.23]+ko01100//Metabolic pathways+ko00561//Glycerolipid metabolism	XP_021725102.1|1.0e-218|uncharacterized protein LOC110692414 [Chenopodium quinoa]	GO:0031224//intrinsic component of membrane;GO:0016020//membrane;GO:0016021//integral component of membrane;GO:0110165//cellular anatomical entity;GO:0016787//hydrolase activity;GO:0016788//hydrolase activity, acting on ester bonds;GO:0016298//lipase activity;GO:0003824//catalytic activity;
LOC110692425	XM_021869428.1,XM_021869435.1,XM_021869424.1,XM_021869441.1	3.32	0.833	1.273	1.006	0.356821	0.818415	0.440241	-0.102498	0.966164	0.84925	1.85143	0.000122283	1.36203e-05	NA	K16812//targeting protein for Xklp2;K16812//targeting protein for Xklp2;K16812//targeting protein for Xklp2;K16812//targeting protein for Xklp2	XP_021725127.1|5.1e-245|protein TPX2-like isoform X3 [Chenopodium quinoa]	NA
LOC110692456	XM_021869450.1	17.95	3.85	5.74	5.166	0.237221	0.743158	0.335009	-0.304481	0.541461	0.134466	1.93451	2.67186e-06	2.06049e-07	NA	K15429//tRNA (guanine37-N1)-methyltransferase [EC:2.1.1.228];K19893//glucan endo-1,3-beta-glucosidase 5/6 [EC:3.2.1.39]+ko00500//Starch and sucrose metabolism	XP_021725142.1|3.0e-287|glucan endo-1,3-beta-glucosidase 8-like [Chenopodium quinoa]	NA
LOC110692476	XM_021869483.1	4.726	2.523	3.176	2.54	0.397963	0.542263	0.163235	0.109068	0.928406	0.714695	1.10388	0.000216845	2.58411e-05	NA	K00878//hydroxyethylthiazole kinase [EC:2.7.1.50]+ko01100//Metabolic pathways+ko00730//Thiamine metabolism	XP_021725175.1|5.4e-149|hydroxyethylthiazole kinase-like [Chenopodium quinoa]	GO:0044237//cellular metabolic process;GO:0008152//metabolic process;GO:1901576//organic substance biosynthetic process;GO:0009228//thiamine biosynthetic process;GO:0072527//pyrimidine-containing compound metabolic process;GO:0034654//nucleobase-containing compound biosynthetic process;GO:1901566//organonitrogen compound biosynthetic process;GO:0006807//nitrogen compound metabolic process;GO:1901…
LOC110692485	XM_021869494.1	64.24	36.443	55.686	33.363	0.803178	0.110256	0.010224	0.245178	0.583402	0.156327	1.16528	3.28551e-12	1.09657e-13	NA	K03676//glutaredoxin 3	XP_021725186.1|6.0e-52|monothiol glutaredoxin-S11-like [Chenopodium quinoa]	GO:0042592//homeostatic process;GO:0065007//biological regulation;GO:0050789//regulation of biological process;GO:0050794//regulation of cellular process;GO:0009987//cellular process;GO:0065008//regulation of biological quality;GO:0045454//cell redox homeostasis;GO:0019725//cellular homeostasis;GO:0003824//catalytic activity;GO:0016491//oxidoreductase activity;GO:0015036//disulfide oxidoreductase…
LOC110692490	XM_021869499.1	7.023	1.753	1.6	1	0.71189	0.279129	0.0469484	0.807356	0.489941	0.10992	2.97397	1.72354e-21	2.48939e-23	NA	NA	XP_021725191.1|1.4e-149|uncharacterized protein LOC110692490 [Chenopodium quinoa]	NA
LOC110692519	XM_021869554.1	10.856	3.096	3.086	2.37	0.43301	0.690919	0.279775	0.45478	0.777908	0.307847	2.32761	2.19006e-07	1.40302e-08	NA	K17545//serine/threonine-protein kinase ULK4 [EC:2.7.11.1];K14561//U3 small nucleolar ribonucleoprotein protein IMP4+ko03008//Ribosome biogenesis in eukaryotes;K03517//quinolinate synthase [EC:2.5.1.72]+ko01100//Metabolic pathways+ko00760//Nicotinate and nicotinamide metabolism	XP_021725246.1|2.1e-158|DNA-binding protein K10-like [Chenopodium quinoa]	GO:0006807//nitrogen compound metabolic process;GO:0071704//organic substance metabolic process;GO:0006259//DNA metabolic process;GO:0044238//primary metabolic process;GO:1901360//organic cyclic compound metabolic process;GO:0043170//macromolecule metabolic process;GO:0009987//cellular process;GO:0006725//cellular aromatic compound metabolic process;GO:0015074//DNA integration;GO:0034641//cellula…
LOC110692521	XM_021869556.1	1.356	0.21	0.46	0.17	0.856166	0.6344	0.228163	0.263849	0.928807	0.715919	2.72489	0.00104753	0.000150118	NA	K03327//multidrug resistance protein, MATE family	XP_021725248.1|6.6e-284|protein DETOXIFICATION 55-like [Chenopodium quinoa]	GO:0016021//integral component of membrane;GO:0016020//membrane;GO:0110165//cellular anatomical entity;GO:0031224//intrinsic component of membrane;GO:0005215//transporter activity;GO:0015291//secondary active transmembrane transporter activity;GO:0022857//transmembrane transporter activity;GO:0015297//antiporter activity;GO:0042910//xenobiotic transmembrane transporter activity;GO:0022804//active…
LOC110692530	XM_021869565.1	0.37	0.07	0.256	0.12	0.942004	0.457461	0.11722	-0.496565	0.869018	0.445815	1.74082	0.0113183	0.00231688	NA	K13459//disease resistance protein RPS2+ko04626//Plant-pathogen interaction	XP_021725257.1|0.0e+00|LOW QUALITY PROTEIN: probable disease resistance protein At1g12280 [Chenopodium quinoa]	NA
LOC110692683	XM_021869719.1	1.04	0.296	0.27	0.163	0.476697	0.861029	0.503535	0.50685	0.89491	0.488021	2.30226	0.0188143	0.00420345	NA	K04730//interleukin-1 receptor-associated kinase 1 [EC:2.7.11.1]	XP_021725411.1|2.3e-273|receptor kinase-like protein Xa21 [Chenopodium quinoa]	NA
LOC110692727	XM_021869772.1	1.376	1.043	1.213	0.763	0.700076	0.332248	0.0638047	0.495727	0.785919	0.316406	1.02904	0.0336627	0.00839177	NA	NA	XP_021725464.1|2.6e-79|CASP-like protein 5C1 [Chenopodium quinoa]	GO:0110165//cellular anatomical entity;GO:0005886//plasma membrane;GO:0031224//intrinsic component of membrane;GO:0071944//cell periphery;GO:0016020//membrane;GO:0016021//integral component of membrane;
LOC110692739	XM_021869783.1	9.793	9.19	8.223	5.22	0.725814	0.0142784	0.00060225	0.902519	0.00642441	0.0002757	1.12447	2.05762e-05	1.91567e-06	NA	K22378//E3 ubiquitin-protein ligase RNF181 [EC:2.3.2.27]	XP_021725475.1|2.9e-123|probable E3 ubiquitin-protein ligase RHB1A [Chenopodium quinoa]	GO:0008270//zinc ion binding;GO:0043169//cation binding;GO:0046872//metal ion binding;GO:0043167//ion binding;GO:0046914//transition metal ion binding;GO:0005488//binding;
LOC110692762	XM_021869826.1	0.906	0.483	0.62	0.046	1.91097	0.0896789	0.00750078	1.08093	0.519878	0.123356	3.46381	0.00014876	1.69242e-05	NA	K14985//26-hydroxylase [EC:1.14.-.-];K00512//steroid 17alpha-monooxygenase / 17alpha-hydroxyprogesterone deacetylase [EC:1.14.14.19 1.14.14.32]+ko01100//Metabolic pathways	XP_021725518.1|5.9e-309|flavonoid 3'-monooxygenase-like [Chenopodium quinoa]	NA
LOC110692823	XM_021869903.1,XM_021869904.1	15.506	11	12.56	8.673	0.60804	0.0104499	0.00040205	0.449437	0.140403	0.0147695	1.06112	3.28974e-07	2.17028e-08	NA	NA	XP_021725595.1|0.0e+00|protein ENHANCED DISEASE RESISTANCE 2-like isoform X1 [Chenopodium quinoa]	NA
LOC110692868	XM_021869950.1	0.293	0.056	0.223	0.06	1.23882	0.348181	0.0692738	0.0394076	0.998482	0.957022	2.03001	0.0354973	0.00894682	NA	K20989//urea-proton symporter	XP_010677499.1|2.0e-303|PREDICTED: urea-proton symporter DUR3 isoform X1 [Beta vulgaris subsp. vulgaris]	GO:0016020//membrane;GO:0031224//intrinsic component of membrane;GO:0110165//cellular anatomical entity;GO:0016021//integral component of membrane;GO:0042887//amide transmembrane transporter activity;GO:0022857//transmembrane transporter activity;GO:0015204//urea transmembrane transporter activity;GO:0005215//transporter activity;
LOC110692881	XM_021869961.1	0.26	0.03	0.026	0	0.424566	0.783977	0.383657	0.206462	0.919583	0.572801	3.1603	0.00617575	0.00114512	NA	K22950//acylphloroglucinol glucosyltransferase [EC:2.4.1.358];K08237//hydroquinone glucosyltransferase [EC:2.4.1.218];K14709//solute carrier family 39 (zinc transporter), member 1/2/3	XP_021725653.1|4.6e-282|anthocyanidin 3-O-glucosyltransferase 2-like [Chenopodium quinoa]	GO:0003824//catalytic activity;GO:0016740//transferase activity;GO:0016757//transferase activity, transferring glycosyl groups;GO:0016758//transferase activity, transferring hexosyl groups;
LOC110692910	XM_021869983.1,XM_021869985.1,XM_021869986.1	21.486	12.74	15.206	10.68	0.58141	0.314626	0.0581149	0.359807	0.348099	0.0598987	1.22177	8.19046e-10	3.62888e-11	NA	K12130//pseudo-response regulator 5+ko04712//Circadian rhythm - plant;K12130//pseudo-response regulator 5+ko04712//Circadian rhythm - plant;K12130//pseudo-response regulator 5+ko04712//Circadian rhythm - plant	XP_021725675.1|0.0e+00|two-component response regulator-like APRR5 isoform X1 [Chenopodium quinoa]	NA
LOC110692917	XM_021869994.1	10.353	6.383	8.16	5.163	0.726027	0.0278789	0.0014531	0.416343	0.378064	0.0691877	1.21759	1.34313e-06	9.74627e-08	NA	K11805//WD repeat-containing protein 68	XP_021725686.1|1.8e-195|protein TRANSPARENT TESTA GLABRA 1-like [Chenopodium quinoa]	GO:0042221//response to chemical;GO:0065007//biological regulation;GO:0009725//response to hormone;GO:0009723//response to ethylene;GO:0032880//regulation of protein localization;GO:0010033//response to organic substance;GO:0048856//anatomical structure development;GO:0032879//regulation of localization;GO:0030154//cell differentiation;GO:0009733//response to auxin;GO:0050789//regulation of biolo…
LOC110692928	XM_021870008.1,XM_021870009.1	21.256	12.16	15.536	9.743	0.743375	0.00317944	8.98214e-05	0.425674	0.234615	0.0320605	1.34155	2.98245e-10	1.25156e-11	NA	NA	XP_021725700.1|0.0e+00|uncharacterized protein LOC110692928 [Chenopodium quinoa]	NA
LOC110692935	XM_021870019.1	88.233	37.486	31.64	20.206	0.725815	6.60521e-05	9.31178e-07	0.989027	0.000517931	1.39895e-05	2.3426	2.43818e-70	3.54271e-73	VOZ	K00521//ferric-chelate reductase [EC:1.16.1.7];K13126//polyadenylate-binding protein+ko03015//mRNA surveillance pathway+ko03018//RNA degradation+ko03013//RNA transport;K16296//serine carboxypeptidase-like clade I [EC:3.4.16.-]	XP_021725711.1|0.0e+00|NAC domain-containing protein 14-like [Chenopodium quinoa]	GO:0031323//regulation of cellular metabolic process;GO:0080090//regulation of primary metabolic process;GO:0031326//regulation of cellular biosynthetic process;GO:0019219//regulation of nucleobase-containing compound metabolic process;GO:0019222//regulation of metabolic process;GO:0010468//regulation of gene expression;GO:0050794//regulation of cellular process;GO:0051171//regulation of nitrogen…
LOC110692936	XM_021870021.1,XM_021870020.1,XM_021870022.1	42.22	13.916	18.703	20.73	-0.044002	0.935992	0.783275	-0.423562	0.510871	0.119355	1.23795	6.61326e-05	6.89996e-06	NA	K18729//protein angel;K21777//G2/mitotic-specific cyclin-B, other;K12603//CCR4-NOT transcription complex subunit 6 [EC:3.1.13.4]+ko03018//RNA degradation;K18729//protein angel;K21777//G2/mitotic-specific cyclin-B, other;K12603//CCR4-NOT transcription complex subunit 6 [EC:3.1.13.4]+ko03018//RNA degradation;K18729//protein angel;K21777//G2/mitotic-specific cyclin-B, other;K12603//CCR4-NOT transcri…	XP_021725712.1|1.5e-279|uncharacterized calcium-binding protein At1g02270-like isoform X1 [Chenopodium quinoa]	NA
LOC110692950	BGI_novel_T008358,XM_021870037.1	96.733	43.643	50.536	35.23	0.600104	0.122812	0.0121621	0.422714	0.341642	0.0580318	1.6623	4.12714e-12	1.39717e-13	NA	NA	XP_021725729.1|6.6e-83|uncharacterized protein LOC110692950 [Chenopodium quinoa]	NA
LOC110692958	XM_021870048.1	0.98	0.35	0.49	0.186	0.965513	0.520758	0.149571	0.668272	0.799327	0.333729	2.11901	0.0238626	0.00557402	NA	K01051//pectinesterase [EC:3.1.1.11]+ko00040//Pentose and glucuronate interconversions+ko01100//Metabolic pathways	XP_021725740.1|3.2e-107|21 kDa protein-like [Chenopodium quinoa]	GO:0009639//response to red or far red light;GO:0009314//response to radiation;GO:0009641//shade avoidance;GO:0050896//response to stimulus;GO:0009628//response to abiotic stimulus;GO:0009416//response to light stimulus;GO:0004857//enzyme inhibitor activity;GO:0098772//molecular function regulator;GO:0030234//enzyme regulator activity;
LOC110693001	XM_021870108.1	3.523	0.44	0.86	0.073	1.62563	0.184489	0.0233684	1.68522	0.150736	0.0164476	4.71197	5.68739e-09	2.82945e-10	NA	K12930//anthocyanidin 3-O-glucosyltransferase [EC:2.4.1.115]+ko01100//Metabolic pathways+ko01110//Biosynthesis of secondary metabolites+ko00942//Anthocyanin biosynthesis;K10757//flavonol 3-O-glucosyltransferase [EC:2.4.1.91]+ko01100//Metabolic pathways+ko01110//Biosynthesis of secondary metabolites+ko00944//Flavone and flavonol biosynthesis	XP_021725800.1|9.3e-274|anthocyanidin 3-O-glucosyltransferase 7-like [Chenopodium quinoa]	NA
LOC110693039	BGI_novel_T008400,XM_021870159.1	3.313	1.743	2.18	1.01	1.13902	0.0767808	0.00604037	0.855842	0.241168	0.0333733	1.98129	9.09257e-07	6.39089e-08	NA	K09753//cinnamoyl-CoA reductase [EC:1.2.1.44]+ko01100//Metabolic pathways+ko01110//Biosynthesis of secondary metabolites+ko00940//Phenylpropanoid biosynthesis;K09753//cinnamoyl-CoA reductase [EC:1.2.1.44]+ko01100//Metabolic pathways+ko01110//Biosynthesis of secondary metabolites+ko00940//Phenylpropanoid biosynthesis	XP_021725851.1|9.9e-200|cinnamoyl-CoA reductase 2-like [Chenopodium quinoa]	GO:1901576//organic substance biosynthetic process;GO:0008152//metabolic process;GO:0008610//lipid biosynthetic process;GO:0009058//biosynthetic process;GO:0071704//organic substance metabolic process;GO:0006629//lipid metabolic process;GO:1901360//organic cyclic compound metabolic process;GO:0044238//primary metabolic process;GO:0008202//steroid metabolic process;GO:0006694//steroid biosynthetic…
LOC110693044	XM_021870165.1	22.813	10.6	16.766	8.82	0.97266	0.013309	0.000550926	0.367758	0.746282	0.279	1.57236	5.01116e-08	2.88429e-09	NA	K19761//gamma-glutamylaminecyclotransferase [EC:2.3.2.-]	XP_021725857.1|1.6e-104|putative gamma-glutamylcyclotransferase At3g02910 [Chenopodium quinoa]	GO:0016842//amidine-lyase activity;GO:0003824//catalytic activity;GO:0061929//gamma-glutamylaminecyclotransferase activity;GO:0016840//carbon-nitrogen lyase activity;GO:0016829//lyase activity;
LOC110693056	XM_021870181.1	14.116	10.856	12.22	6.546	0.96392	0.00542698	0.000172599	0.826934	0.00290389	0.000106452	1.32032	1.85852e-08	9.95943e-10	NA	K19036//ATP-dependent RNA/DNA helicase IGHMBP2 [EC:3.6.4.12 3.6.4.13]	KNA13086.1|0.0e+00|hypothetical protein SOVF_119860 [Spinacia oleracea]	GO:0043229//intracellular organelle;GO:0009536//plastid;GO:0005622//intracellular;GO:0043226//organelle;GO:0031967//organelle envelope;GO:0009570//chloroplast stroma;GO:0043231//intracellular membrane-bounded organelle;GO:0009532//plastid stroma;GO:0031975//envelope;GO:0009526//plastid envelope;GO:0110165//cellular anatomical entity;GO:0009507//chloroplast;GO:0009941//chloroplast envelope;GO:0043…
LOC110693092	XM_021870219.1	4.533	4.216	3.563	2.563	0.501808	0.635814	0.229045	0.770945	0.306127	0.0484717	1.00597	0.0403471	0.0104309	NA	K11649//SWI/SNF related-matrix-associated actin-dependent regulator of chromatin subfamily C	XP_021725911.1|5.1e-192|F-box protein At3g07870-like [Chenopodium quinoa]	NA
LOC110693176	XM_021870300.1	33.023	22.273	22.806	15.856	0.557035	0.648607	0.239608	0.55828	0.577744	0.153026	1.22423	0.0132128	0.00277774	NA	K15803//(-)-germacrene D synthase [EC:4.2.3.75]+ko00909//Sesquiterpenoid and triterpenoid biosynthesis	XP_021725992.1|0.0e+00|probable sesquiterpene synthase [Chenopodium quinoa]	NA
LOC110693213	XM_021870353.1,XM_021870352.1	2.47	1.42	1.696	1.316	0.411881	0.720987	0.309423	0.183158	0.919583	0.663077	1.08072	0.0240763	0.00563282	NA	NA	XP_021726045.1|2.0e-58|uncharacterized protein LOC110693213 isoform X2 [Chenopodium quinoa]	NA
LOC110693217	XM_021870356.1	2.256	0.613	1.24	0.28	1.52611	0.168435	0.0202049	0.997334	0.434394	0.087225	2.80827	0.00013987	1.57916e-05	NA	NA	XP_021726048.1|4.6e-207|uncharacterized protein LOC110693217 [Chenopodium quinoa]	NA
LOC110693218	XM_021870357.1	37.81	16.923	18.8	14.603	0.426889	0.356408	0.072581	0.317597	0.536258	0.131415	1.57376	2.72698e-11	1.00537e-12	NA	K13459//disease resistance protein RPS2+ko04626//Plant-pathogen interaction	XP_021726049.1|1.2e-226|putative disease resistance protein At3g15700 [Chenopodium quinoa]	NA
LOC110693228	XM_021870369.1,XM_021870372.1,XM_021870367.1,XM_021870368.1	79.216	25.623	37.886	28.033	0.497428	0.251146	0.0388421	-0.00736619	0.998482	0.975885	1.7157	1.04313e-14	2.71239e-16	NA	K13459//disease resistance protein RPS2+ko04626//Plant-pathogen interaction;K13459//disease resistance protein RPS2+ko04626//Plant-pathogen interaction;K13459//disease resistance protein RPS2+ko04626//Plant-pathogen interaction;K13459//disease resistance protein RPS2+ko04626//Plant-pathogen interaction	XP_021726059.1|1.1e-218|probable disease resistance protein At1g12290 [Chenopodium quinoa]	GO:1901363//heterocyclic compound binding;GO:0097367//carbohydrate derivative binding;GO:0043168//anion binding;GO:0005488//binding;GO:1901265//nucleoside phosphate binding;GO:0097159//organic cyclic compound binding;GO:0032553//ribonucleotide binding;GO:0032559//adenyl ribonucleotide binding;GO:0043167//ion binding;GO:0000166//nucleotide binding;GO:0036094//small molecule binding;GO:0043531//ADP…
LOC110693238	XM_021870390.1,BGI_novel_T008434,XM_021870393.1,XM_021870391.1,XM_021870388.1,BGI_novel_T008433,XM_021870389.1,XM_021870387.1,BGI_novel_T008435,XM_021870392.1,XM_021870386.1	11.37	3.78	3.866	2.193	0.858104	0.0391061	0.00227092	0.849442	0.18905	0.0231666	2.57178	1.47625e-49	4.70623e-52	NA	K13459//disease resistance protein RPS2+ko04626//Plant-pathogen interaction;K13459//disease resistance protein RPS2+ko04626//Plant-pathogen interaction;K13459//disease resistance protein RPS2+ko04626//Plant-pathogen interaction;K13459//disease resistance protein RPS2+ko04626//Plant-pathogen interaction;K13459//disease resistance protein RPS2+ko04626//Plant-pathogen interaction;K13459//disease res…	XP_021726078.1|0.0e+00|uncharacterized protein LOC110693238 isoform X1 [Chenopodium quinoa]	NA
LOC110693248	XM_021870402.1	0.21	0.05	0.22	0.063	1.50652	0.112337	0.0105345	-0.0962243	0.977717	0.884815	1.80213	0.0115901	0.0023843	NA	K17604//zinc finger SWIM domain-containing protein 3	XP_021726094.1|5.1e-130|uncharacterized protein LOC110693248 [Chenopodium quinoa]	NA
LOC110693289	XM_021870447.1	0.586	0.106	0.106	0.08	0.138465	0.949728	0.825704	0.256979	0.931129	0.722441	2.79904	0.000175845	2.04099e-05	NA	K02925//large subunit ribosomal protein L3e+ko03010//Ribosome;K12524//bifunctional aspartokinase / homoserine dehydrogenase 1 [EC:2.7.2.4 1.1.1.3]+ko00300//Lysine biosynthesis+ko01230//Biosynthesis of amino acids+ko01100//Metabolic pathways+ko01110//Biosynthesis of secondary metabolites+ko00261//Monobactam biosynthesis+ko00260//Glycine, serine and threonine metabolism+ko00270//Cysteine and methio…	XP_021726139.1|0.0e+00|zinc finger MYM-type protein 1-like [Chenopodium quinoa]	NA
LOC110693300	XM_021870456.1	0.68	0.163	0.046	0.023	0.197025	0.916587	0.725203	1.00054	0.592036	0.161064	3.22653	0.00228925	0.000365449	NA	K04733//interleukin-1 receptor-associated kinase 4 [EC:2.7.11.1];K12447//UDP-sugar pyrophosphorylase [EC:2.7.7.64]+ko00520//Amino sugar and nucleotide sugar metabolism+ko00040//Pentose and glucuronate interconversions+ko01100//Metabolic pathways+ko00052//Galactose metabolism+ko00053//Ascorbate and aldarate metabolism;K20855//beta-1,3-galactosyltransferase 1/2/3/4/5/7/8 [EC:2.4.1.-];K03260//transl…	XP_021726148.1|1.8e-186|uncharacterized protein LOC110693300 [Chenopodium quinoa]	NA
LOC110693353	XM_021870490.1	4.95	1.413	1.683	1.243	0.477876	0.558531	0.173266	0.286037	0.895693	0.490237	2.16343	8.99559e-10	3.99925e-11	NA	K00924//kinase [EC:2.7.1.-]	XP_021726182.1|0.0e+00|receptor protein kinase CLAVATA1-like [Chenopodium quinoa]	GO:0003824//catalytic activity;
LOC110693368	BGI_novel_T008470,BGI_novel_T008469,XM_021870501.1	3.89	1.78	2.51	1.333	0.62148	0.463739	0.120375	0.307291	0.833511	0.37926	1.4047	9.44154e-05	1.02133e-05	NA	K04733//interleukin-1 receptor-associated kinase 4 [EC:2.7.11.1];K04733//interleukin-1 receptor-associated kinase 4 [EC:2.7.11.1];K04733//interleukin-1 receptor-associated kinase 4 [EC:2.7.11.1]	XP_021726193.1|0.0e+00|LOW QUALITY PROTEIN: uncharacterized protein LOC110693368 [Chenopodium quinoa]	NA
LOC110693390	XM_021870514.1	0.246	0.04	0.096	0.006	1.94903	0.0796495	0.00637022	0.879675	0.661037	0.206646	3.93455	3.73047e-05	3.67618e-06	NA	K22804//structural maintenance of chromosomes protein 6;K18195//rhamnogalacturonan endolyase [EC:4.2.2.23];K19026//spatacsin;K01188//beta-glucosidase [EC:3.2.1.21]+ko01100//Metabolic pathways+ko00500//Starch and sucrose metabolism+ko01110//Biosynthesis of secondary metabolites+ko00460//Cyanoamino acid metabolism+ko00940//Phenylpropanoid biosynthesis	XP_021726206.1|0.0e+00|uncharacterized protein LOC110693390 [Chenopodium quinoa]	GO:0016891//endoribonuclease activity, producing 5'-phosphomonoesters;GO:0003676//nucleic acid binding;GO:1901363//heterocyclic compound binding;GO:0005488//binding;GO:0004518//nuclease activity;GO:0140098//catalytic activity, acting on RNA;GO:0016893//endonuclease activity, active with either ribo- or deoxyribonucleic acids and producing 5'-phosphomonoesters;GO:0097159//organic cyclic compound b…
LOC110693415	XM_021870535.1,BGI_novel_T008503	21.023	1.97	1.706	0.753	1.09761	0.198341	0.0261184	1.24503	0.203963	0.02604	4.86169	4.47479e-39	2.32905e-41	NA	K20254//perilipin-4	XP_021726227.1|1.2e-255|late embryogenesis abundant protein D-29-like [Chenopodium quinoa]	NA
LOC110693422	XM_021870541.1,XM_021870542.1	3.296	1.323	1.09	1.483	-0.34067	0.854483	0.491338	-0.0551069	0.982403	0.900904	1.29709	0.00883531	0.00173294	NA	K04733//interleukin-1 receptor-associated kinase 4 [EC:2.7.11.1];K04733//interleukin-1 receptor-associated kinase 4 [EC:2.7.11.1]	XP_021726234.1|0.0e+00|putative receptor-like protein kinase At4g00960 isoform X2 [Chenopodium quinoa]	NA
LOC110693446	XM_021870557.1	0.303	0	0.08	0	0.632583	0.668899	0.259057	NA	NA	NA	2.78109	0.0218029	0.00500544	NA	K04733//interleukin-1 receptor-associated kinase 4 [EC:2.7.11.1]	XP_021726249.1|2.9e-163|cysteine-rich repeat secretory protein 38-like [Chenopodium quinoa]	NA
LOC110693460	XM_021870571.1	0.716	0.44	0.636	0.293	0.93228	0.423775	0.10069	0.55416	0.788396	0.319196	1.38905	0.0284824	0.00687677	NA	NA	XP_021726263.1|0.0e+00|BTB/POZ domain-containing protein At3g22104-like [Chenopodium quinoa]	NA
LOC110693467	XM_021870580.1	1.2	1.086	1.346	0.616	1.08589	0.111064	0.0103596	0.838546	0.31632	0.0511181	1.13746	0.0107601	0.00218743	NA	K04733//interleukin-1 receptor-associated kinase 4 [EC:2.7.11.1]	XP_021726272.1|0.0e+00|putative receptor-like protein kinase At4g00960 [Chenopodium quinoa]	NA
LOC110693480	XM_021870595.1	36.683	16.916	21.73	12.916	0.813299	0.0609243	0.00427404	0.489663	0.444493	0.0908612	1.70319	1.18121e-09	5.31801e-11	NA	K05765//cofilin;K16189//phytochrome-interacting factor 4+ko04075//Plant hormone signal transduction;K12126//phytochrome-interacting factor 3+ko04712//Circadian rhythm - plant+ko04075//Plant hormone signal transduction	XP_021726287.1|1.5e-277|transcription factor bHLH112-like [Chenopodium quinoa]	GO:0005515//protein binding;GO:0046983//protein dimerization activity;GO:0005488//binding;
LOC110693484	XM_021870598.1	16.546	11.05	9.41	7.573	0.375554	0.567052	0.178272	0.642584	0.107414	0.0101298	1.33931	7.50217e-07	5.20796e-08	NA	K04733//interleukin-1 receptor-associated kinase 4 [EC:2.7.11.1]	XP_021726290.1|0.0e+00|receptor-like serine/threonine-protein kinase SD1-8 [Chenopodium quinoa]	NA
LOC110693485	XM_021870600.1	1.623	0.79	0.946	0.706	0.488286	0.610404	0.208608	0.267831	0.860106	0.421848	1.39755	6.02455e-05	6.22661e-06	NA	K04733//interleukin-1 receptor-associated kinase 4 [EC:2.7.11.1]	XP_021726292.1|0.0e+00|G-type lectin S-receptor-like serine/threonine-protein kinase At1g11410 [Chenopodium quinoa]	NA
LOC110693487	XM_021870602.1	3.82	2.94	2.553	2.036	0.394486	0.42126	0.0996974	0.62272	0.0989799	0.00899403	1.11913	4.93538e-06	4.02122e-07	NA	K04733//interleukin-1 receptor-associated kinase 4 [EC:2.7.11.1]	XP_021726294.1|0.0e+00|G-type lectin S-receptor-like serine/threonine-protein kinase B120 [Chenopodium quinoa]	NA
LOC110693490	XM_021870603.1,BGI_novel_T008477	0.946	0.516	0.756	0.473	0.758443	0.0775063	0.00613293	0.270654	0.85551	0.413068	1.28602	2.00417e-05	1.862e-06	NA	K04733//interleukin-1 receptor-associated kinase 4 [EC:2.7.11.1];K04733//interleukin-1 receptor-associated kinase 4 [EC:2.7.11.1]	XP_021726295.1|0.0e+00|G-type lectin S-receptor-like serine/threonine-protein kinase At1g11330 [Chenopodium quinoa]	NA
LOC110693503	XM_021870619.1	5.216	3.846	4.25	2.893	0.604756	0.250615	0.0386617	0.507492	0.456216	0.0952627	1.0552	0.00078796	0.000108767	NA	K13691//pathogen-inducible salicylic acid glucosyltransferase [EC:2.4.1.-]	XP_021726311.1|1.1e-288|UDP-glycosyltransferase 86A2-like [Chenopodium quinoa]	GO:0016740//transferase activity;GO:0016758//transferase activity, transferring hexosyl groups;GO:0016757//transferase activity, transferring glycosyl groups;GO:0003824//catalytic activity;
LOC110693510	XM_021870627.1	13.466	3.176	1.9	1.14	0.795242	0.0714857	0.00538694	1.39294	0.0706283	0.00565503	3.74917	2.10151e-75	2.46105e-78	MYB	K09422//transcription factor MYB, plant	XP_021726319.1|2.3e-232|transcription factor MYB102-like [Chenopodium quinoa]	GO:0003676//nucleic acid binding;GO:0005488//binding;GO:0003677//DNA binding;GO:1901363//heterocyclic compound binding;GO:0097159//organic cyclic compound binding;
LOC110693512	XM_021870629.1,XM_021870628.1	9.976	0.753	0.803	0.27	1.25486	0.276551	0.0461532	1.12314	0.456199	0.0952293	5.157	1.08294e-31	8.71311e-34	MYB	K09422//transcription factor MYB, plant;K09422//transcription factor MYB, plant	XP_021726321.1|3.1e-231|transcription factor MYB41-like isoform X2 [Chenopodium quinoa]	NA
LOC110693526	XM_021870645.1,XM_021870646.1	3.346	2.036	2.53	1.51	0.797574	0.155589	0.0175888	0.526203	0.3447	0.0589665	1.35448	2.34186e-06	1.78569e-07	NA	K15047//heterogeneous nuclear ribonucleoprotein U-like protein 1;K15047//heterogeneous nuclear ribonucleoprotein U-like protein 1	XP_021726337.1|0.0e+00|heterogeneous nuclear ribonucleoprotein U-like protein 1 isoform X1 [Chenopodium quinoa]	NA
LOC110693531	XM_021870653.1,XM_021870652.1	35.526	21.223	22.273	13.913	0.758939	0.000413234	7.96291e-06	0.716512	0.00482742	0.000195533	1.57898	1.15004e-29	1.01758e-31	NA	K21989//calcium permeable stress-gated cation channel;K21989//calcium permeable stress-gated cation channel	XP_021726344.1|0.0e+00|calmodulin-binding protein 60 B-like [Chenopodium quinoa]	GO:0005516//calmodulin binding;GO:0005515//protein binding;GO:0005488//binding;
LOC110693538	XM_021870663.1	25.09	5.73	3.986	2.286	0.821282	0.339067	0.0659945	1.24698	0.152215	0.0166904	3.57633	1.5391e-22	2.0465e-24	NA	K12486//stromal membrane-associated protein+ko04144//Endocytosis	XP_021726355.1|2.7e-285|probable ADP-ribosylation factor GTPase-activating protein AGD5 [Chenopodium quinoa]	GO:0030695//GTPase regulator activity;GO:0043167//ion binding;GO:0060589//nucleoside-triphosphatase regulator activity;GO:0043169//cation binding;GO:0098772//molecular function regulator;GO:0046872//metal ion binding;GO:0008047//enzyme activator activity;GO:0030234//enzyme regulator activity;GO:0005096//GTPase activator activity;GO:0005488//binding;
LOC110693580	XM_021870713.1	24.653	8.603	9.746	11.073	-0.101491	0.898091	0.616188	-0.240348	0.742143	0.274818	1.3715	1.61002e-11	5.78562e-13	C2C2-Dof	K20043//clathrin coat assembly protein AP180;K09326//homeobox protein OTX1;K04733//interleukin-1 receptor-associated kinase 4 [EC:2.7.11.1];K16222//Dof zinc finger protein DOF5.5+ko04712//Circadian rhythm - plant	XP_021726405.1|1.5e-188|dof zinc finger protein DOF4.7-like [Chenopodium quinoa]	GO:2000112//regulation of cellular macromolecule biosynthetic process;GO:0010556//regulation of macromolecule biosynthetic process;GO:0060255//regulation of macromolecule metabolic process;GO:0031323//regulation of cellular metabolic process;GO:1903506//regulation of nucleic acid-templated transcription;GO:0019219//regulation of nucleobase-containing compound metabolic process;GO:0051252//regulat…
LOC110693586	XM_021870719.1	2.87	0.116	0.17	0.033	1.40411	0.277086	0.0462967	0.727573	0.777075	0.307237	5.46391	6.37249e-13	1.97763e-14	NA	K20254//perilipin-4	XP_021726411.1|1.4e-286|late embryogenesis abundant protein At3g53040-like [Chenopodium quinoa]	NA
LOC110693625	XM_021870768.1	0.546	0.026	0.026	0.026	0.0142271	0.999966	0.972826	0.00791717	0.998482	0.984856	2.62117	0.0261165	0.0062104	bHLH	NA	XP_021726460.1|2.0e-91|transcription factor bHLH162-like [Chenopodium quinoa]	NA
LOC110693628	XM_021870770.1	81.356	55.116	56.466	40.083	0.544568	0.305732	0.0551239	0.568616	0.0632455	0.00490552	1.23272	2.00008e-10	8.19795e-12	NA	K04733//interleukin-1 receptor-associated kinase 4 [EC:2.7.11.1]	XP_021726462.1|7.4e-115|VQ motif-containing protein 4-like [Chenopodium quinoa]	NA
LOC110693629	XM_021870772.1,XM_021870775.1,BGI_novel_T008499,XM_021870771.1,BGI_novel_T008501,BGI_novel_T008500,XM_021870774.1,XM_021870773.1,BGI_novel_T008498	3.55	1.763	1.603	0.97	0.77677	0.0225471	0.00110234	0.949044	0.00299853	0.000110868	2.06208	5.06746e-09	2.49246e-10	NA	K14409//protein SMG7+ko03015//mRNA surveillance pathway;K14409//protein SMG7+ko03015//mRNA surveillance pathway;K14409//protein SMG7+ko03015//mRNA surveillance pathway;K14409//protein SMG7+ko03015//mRNA surveillance pathway;K14409//protein SMG7+ko03015//mRNA surveillance pathway;K14409//protein SMG7+ko03015//mRNA surveillance pathway;K14409//protein SMG7+ko03015//mRNA surveillance pathway;K14409/…	XP_021726463.1|0.0e+00|protein SMG7L-like [Chenopodium quinoa]	NA
LOC110693653	BGI_novel_T008509,XM_021870800.1	9.616	6.066	4.84	3.46	0.542617	0.421976	0.0999405	0.973662	0.0136965	0.000686489	1.69614	1.67452e-08	8.90441e-10	NA	NA	XP_021726492.1|8.0e-69|protein yippee-like At5g53940 [Chenopodium quinoa]	GO:0043167//ion binding;GO:0046872//metal ion binding;GO:0005488//binding;GO:0043169//cation binding;
LOC110693660	XM_021870810.1,XM_021870809.1	25.816	7.28	7.28	3.816	0.956388	0.0301447	0.00161254	0.994215	0.0365799	0.00237034	2.92168	2.96877e-28	2.86505e-30	NA	K01183//chitinase [EC:3.2.1.14]+ko00520//Amino sugar and nucleotide sugar metabolism+ko01100//Metabolic pathways;K14638//solute carrier family 15 (peptide/histidine transporter), member 3/4;K14638//solute carrier family 15 (peptide/histidine transporter), member 3/4;K01183//chitinase [EC:3.2.1.14]+ko00520//Amino sugar and nucleotide sugar metabolism+ko01100//Metabolic pathways	XP_021726501.1|0.0e+00|MACPF domain-containing protein NSL1-like isoform X1 [Chenopodium quinoa]	NA
LOC110693662	XM_021870811.1,XM_021870812.1,XM_021870813.1	25.886	21.11	20.163	13.746	0.62602	0.0226077	0.00110587	0.71479	0.0256672	0.0015052	1.13102	4.71089e-08	2.70531e-09	NA	K22376//E3 ubiquitin-protein ligase KCMF1 [EC:2.3.2.27];K22376//E3 ubiquitin-protein ligase KCMF1 [EC:2.3.2.27];K22376//E3 ubiquitin-protein ligase KCMF1 [EC:2.3.2.27]	XP_021726503.1|1.1e-134|protein DEHYDRATION-INDUCED 19 homolog 4-like [Chenopodium quinoa]	NA
LOC110693676	XM_021870836.1	1.206	0.636	0.743	0.59	0.40895	0.613145	0.211047	0.200446	0.919583	0.631131	1.23216	0.000186567	2.18042e-05	NA	K13103//tuftelin-interacting protein 11	XP_021726528.1|0.0e+00|septin and tuftelin-interacting protein 1 homolog 1-like [Chenopodium quinoa]	GO:0034641//cellular nitrogen compound metabolic process;GO:0046483//heterocycle metabolic process;GO:0006139//nucleobase-containing compound metabolic process;GO:0090304//nucleic acid metabolic process;GO:1901360//organic cyclic compound metabolic process;GO:0008152//metabolic process;GO:0016070//RNA metabolic process;GO:0044237//cellular metabolic process;GO:0006397//mRNA processing;GO:0006807/…
LOC110693699	XM_021870868.1	0.54	0.14	0.206	0.113	0.643064	0.742991	0.334641	0.262278	0.926092	0.708835	2.11353	0.0111124	0.00226968	NA	K07976//Rab family, other;K07904//Ras-related protein Rab-11A+ko04144//Endocytosis	XP_021726560.1|2.9e-117|ras-related protein RABA1f-like [Chenopodium quinoa]	GO:0019001//guanyl nucleotide binding;GO:0003924//GTPase activity;GO:0043167//ion binding;GO:0017111//nucleoside-triphosphatase activity;GO:0001883//purine nucleoside binding;GO:1901363//heterocyclic compound binding;GO:0036094//small molecule binding;GO:0032550//purine ribonucleoside binding;GO:0032549//ribonucleoside binding;GO:0016787//hydrolase activity;GO:0000166//nucleotide binding;GO:00325…
LOC110693767	XM_021870937.1	0.533	0	0	0	NA	NA	NA	NA	NA	NA	3.48708	0.00166298	0.000254461	bHLH	NA	XP_021726629.1|9.3e-95|transcription factor bHLH162-like [Chenopodium quinoa]	NA
LOC110693795	XM_021870946.1	2.523	2.69	1.733	1.01	0.754311	0.415664	0.0971441	1.35562	0.0517994	0.00376277	1.48703	0.00335909	0.000567486	NA	K01805//xylose isomerase [EC:5.3.1.5]+ko00040//Pentose and glucuronate interconversions+ko01100//Metabolic pathways+ko00051//Fructose and mannose metabolism	XP_021726638.1|1.1e-247|putative lipase C4A8.10 [Chenopodium quinoa]	NA
LOC110693801	XM_021870950.1	6.313	1.206	1.2	0.75	0.643715	0.60708	0.206091	0.730528	0.449848	0.0927013	3.21585	1.51077e-23	1.87736e-25	NA	K00512//steroid 17alpha-monooxygenase / 17alpha-hydroxyprogesterone deacetylase [EC:1.14.14.19 1.14.14.32]+ko01100//Metabolic pathways;K13260//isoflavone/4'-methoxyisoflavone 2'-hydroxylase [EC:1.14.14.90 1.14.14.89]+ko01110//Biosynthesis of secondary metabolites+ko00943//Isoflavonoid biosynthesis	XP_021726642.1|9.2e-301|isoflavone 3'-hydroxylase-like [Chenopodium quinoa]	NA
LOC110693822	XM_021870973.1	23.87	14.236	16.1	9.966	0.755543	0.0578871	0.00397292	0.614843	0.0647886	0.00506682	1.46987	1.43472e-07	8.86763e-09	NA	K19613//leucine-rich repeat protein SHOC2;K13457//disease resistance protein RPM1+ko04626//Plant-pathogen interaction	XP_021726665.1|0.0e+00|probable disease resistance protein At4g33300 [Chenopodium quinoa]	GO:0043167//ion binding;GO:0017076//purine nucleotide binding;GO:0030554//adenyl nucleotide binding;GO:0036094//small molecule binding;GO:0000166//nucleotide binding;GO:0032559//adenyl ribonucleotide binding;GO:0005488//binding;GO:0043168//anion binding;GO:0097367//carbohydrate derivative binding;GO:1901363//heterocyclic compound binding;GO:0097159//organic cyclic compound binding;GO:1901265//nuc…
LOC110693842	XM_021871002.1	3.23	1.276	1.453	1.023	0.549114	0.532018	0.156364	0.403717	0.79408	0.326583	1.82655	7.96173e-07	5.54598e-08	NA	NA	XP_021726694.1|8.2e-207|UPF0496 protein At3g49070-like [Chenopodium quinoa]	NA
LOC110693899	XM_021871073.1	98.223	52.48	66.763	38.293	0.858347	0.000208856	3.55112e-06	0.563591	0.0290875	0.00176568	1.5714	1.01335e-14	2.63055e-16	NA	K20721//reticulon-1	XP_021764987.1|3.5e-162|reticulon-like protein B4 [Chenopodium quinoa]	GO:0031090//organelle membrane;GO:0005789//endoplasmic reticulum membrane;GO:0016021//integral component of membrane;GO:0042175//nuclear outer membrane-endoplasmic reticulum membrane network;GO:0012505//endomembrane system;GO:0016020//membrane;GO:0043226//organelle;GO:0031224//intrinsic component of membrane;GO:0043227//membrane-bounded organelle;GO:0110165//cellular anatomical entity;
LOC110693903	XM_021871076.1,XM_021871077.1	18.94	4.64	7.213	7.236	0.083589	0.954761	0.842291	-0.448909	0.80727	0.346349	1.56037	0.00137862	0.000205757	NA	NA	XP_021726768.1|0.0e+00|S-type anion channel SLAH2-like [Chenopodium quinoa]	GO:0009987//cellular process;GO:0050801//ion homeostasis;GO:0055082//cellular chemical homeostasis;GO:0006873//cellular ion homeostasis;GO:0042592//homeostatic process;GO:0065008//regulation of biological quality;GO:0065007//biological regulation;GO:0019725//cellular homeostasis;GO:0048878//chemical homeostasis;GO:0016020//membrane;GO:0031224//intrinsic component of membrane;GO:0110165//cellular …
LOC110693905	XM_021871079.1	1.346	0.08	0.12	0.04	0.836145	0.652069	0.242827	0.586385	0.860106	0.422323	4.5141	2.13844e-09	9.98475e-11	NA	K04733//interleukin-1 receptor-associated kinase 4 [EC:2.7.11.1]	XP_021726771.1|0.0e+00|G-type lectin S-receptor-like serine/threonine-protein kinase At5g24080 [Chenopodium quinoa]	NA
LOC110693923	XM_021871098.1	6.44	3.346	3.156	3.66	-0.132746	0.91106	0.711431	-0.0144319	0.998482	0.95926	1.02711	0.0002736	3.3382e-05	NA	K04733//interleukin-1 receptor-associated kinase 4 [EC:2.7.11.1]	XP_021726790.1|0.0e+00|G-type lectin S-receptor-like serine/threonine-protein kinase At2g19130 [Chenopodium quinoa]	NA
LOC110693928	XM_021871107.1,XM_021871102.1,XM_021871106.1,BGI_novel_T008579,XM_021871103.1,BGI_novel_T008577,XM_021871105.1,XM_021871101.1,XM_021871104.1,BGI_novel_T008578	3.64	2	2.313	1.8	0.419213	0.577405	0.185751	0.218178	0.903999	0.506639	1.19302	0.0050337	0.000904977	NA	K09060//plant G-box-binding factor;K09060//plant G-box-binding factor;K09060//plant G-box-binding factor;K09060//plant G-box-binding factor;K09060//plant G-box-binding factor;K09060//plant G-box-binding factor;K09060//plant G-box-binding factor;K09060//plant G-box-binding factor;K09060//plant G-box-binding factor;K09060//plant G-box-binding factor	XP_021726793.1|3.9e-196|G-box-binding factor 3-like isoform X1 [Chenopodium quinoa]	NA
LOC110693935	XM_021871116.1	7.183	3.62	3.573	3.48	0.0978463	0.924869	0.752706	0.161683	0.900428	0.498825	1.25805	4.38099e-08	2.49686e-09	AP2-EREBP	K13434//pathogenesis-related genes transcriptional activator PTI6+ko04626//Plant-pathogen interaction	XP_021726808.1|6.4e-231|ethylene-responsive transcription factor CRF4-like [Chenopodium quinoa]	GO:0005622//intracellular;GO:0043229//intracellular organelle;GO:0005634//nucleus;GO:0110165//cellular anatomical entity;GO:0043227//membrane-bounded organelle;GO:0043231//intracellular membrane-bounded organelle;GO:0043226//organelle;GO:0097159//organic cyclic compound binding;GO:0003677//DNA binding;GO:0140110//transcription regulator activity;GO:0003676//nucleic acid binding;GO:0003700//DNA-bi…
LOC110693950	XM_021871134.1	0.54	0.273	0.403	0	2.10764	0.0506298	0.00327796	1.40392	0.290479	0.044416	3.4838	0.0017703	0.000272853	NA	K19747//BAHD acyltransferase [EC:2.3.1.-];K05747//Wiskott-Aldrich syndrome protein+ko04144//Endocytosis	XP_021726826.1|1.6e-156|protein SRC2-like [Chenopodium quinoa]	NA
LOC110693961	XM_021871142.1	1.23	0.266	0.863	0.266	1.48183	0.0745215	0.00576354	0.0847206	0.980678	0.89524	2.29021	2.6899e-05	2.56681e-06	NA	K13466//EIX receptor 1/2+ko04626//Plant-pathogen interaction;K13420//LRR receptor-like serine/threonine-protein kinase FLS2 [EC:2.7.11.1]+ko04016//MAPK signaling pathway - plant+ko04626//Plant-pathogen interaction	XP_021726834.1|0.0e+00|LRR receptor-like serine/threonine-protein kinase FLS2 [Chenopodium quinoa]	GO:0016021//integral component of membrane;GO:0110165//cellular anatomical entity;GO:0016020//membrane;GO:0031224//intrinsic component of membrane;
LOC110693964	XM_021871144.1	0.913	0.056	0.213	0.03	1.49422	0.240994	0.0363316	0.511384	0.892112	0.484044	4.34785	5.18664e-09	2.55671e-10	NA	K13466//EIX receptor 1/2+ko04626//Plant-pathogen interaction	XP_021726836.1|0.0e+00|LRR receptor-like serine/threonine-protein kinase FLS2 [Chenopodium quinoa]	GO:0110165//cellular anatomical entity;GO:0016021//integral component of membrane;GO:0016020//membrane;GO:0031224//intrinsic component of membrane;
LOC110693965	XM_021871145.1	0.453	0.15	0.793	0.023	1.45537	0.24059	0.0362024	0.714321	0.745952	0.278589	2.83078	0.0109824	0.00224001	MYB	K09422//transcription factor MYB, plant	XP_021726837.1|5.2e-171|transcription factor MYB13-like [Chenopodium quinoa]	GO:0048869//cellular developmental process;GO:0032502//developmental process;GO:0030154//cell differentiation;GO:0009987//cellular process;GO:0005622//intracellular;GO:0005634//nucleus;GO:0043231//intracellular membrane-bounded organelle;GO:0043229//intracellular organelle;GO:0043226//organelle;GO:0043227//membrane-bounded organelle;GO:0110165//cellular anatomical entity;GO:0003676//nucleic acid …
LOC110693993	XM_021871156.1	11.32	4.293	5.49	5.486	0.0865539	0.906006	0.699545	-0.221642	0.879024	0.464901	1.2601	7.04216e-05	7.39326e-06	NA	NA	XP_021726848.1|4.0e-83|uncharacterized protein LOC110693993 [Chenopodium quinoa]	NA
LOC110694013	XM_021871172.1	1.946	1.05	0.9	0.863	0.128437	0.94469	0.805617	0.347048	0.900914	0.499569	1.3377	0.0232089	0.00539667	NA	K19984//exocyst complex component 5;K03283//heat shock 70kDa protein 1/2/6/8+ko03040//Spliceosome+ko04144//Endocytosis+ko04141//Protein processing in endoplasmic reticulum;K20890//xylan alpha-glucuronosyltransferase [EC:2.4.1.-]	XP_021726864.1|7.9e-246|zinc finger BED domain-containing protein RICESLEEPER 2-like [Chenopodium quinoa]	NA
LOC110694088	XM_021871245.1,XM_021871246.1	183.186	94.423	67.956	59.716	0.255673	0.572206	0.182177	0.761735	0.00573193	0.000238574	1.82322	2.23835e-22	3.01936e-24	NA	K12450//UDP-glucose 4,6-dehydratase [EC:4.2.1.76]+ko00520//Amino sugar and nucleotide sugar metabolism;K12450//UDP-glucose 4,6-dehydratase [EC:4.2.1.76]+ko00520//Amino sugar and nucleotide sugar metabolism	XP_021726937.1|0.0e+00|trifunctional UDP-glucose 4,6-dehydratase/UDP-4-keto-6-deoxy-D-glucose 3,5-epimerase/UDP-4-keto-L-rhamnose-reductase RHM1-like [Chenopodium quinoa]	GO:0071704//organic substance metabolic process;GO:0044281//small molecule metabolic process;GO:0044238//primary metabolic process;GO:1901135//carbohydrate derivative metabolic process;GO:0009225//nucleotide-sugar metabolic process;GO:0044237//cellular metabolic process;GO:0055086//nucleobase-containing small molecule metabolic process;GO:0046483//heterocycle metabolic process;GO:0034641//cellula…
LOC110694094	XM_021871253.1	11.556	9.616	4.766	4.583	0.10378	0.945568	0.809163	1.05444	0.143586	0.0152602	1.489	0.00118659	0.000173262	NA	K08286//protein-serine/threonine kinase [EC:2.7.11.-]	XP_021726945.1|5.9e-278|serine/threonine-protein kinase WAG1-like [Chenopodium quinoa]	GO:0004672//protein kinase activity;GO:0005488//binding;GO:0016301//kinase activity;GO:0032555//purine ribonucleotide binding;GO:0030554//adenyl nucleotide binding;GO:0003824//catalytic activity;GO:1901265//nucleoside phosphate binding;GO:0032559//adenyl ribonucleotide binding;GO:0097159//organic cyclic compound binding;GO:1901363//heterocyclic compound binding;GO:0016740//transferase activity;GO…
LOC110694120	XM_021871283.1	18.886	9.85	14.176	5.76	0.958451	0.494879	0.134478	0.717924	0.654621	0.201172	1.76405	0.00665695	0.0012482	NA	K01381//saccharopepsin [EC:3.4.23.25]	XP_021726975.1|2.0e-274|aspartic proteinase CDR1-like [Chenopodium quinoa]	NA
LOC110694126	XM_021871292.1	16.946	9.423	11.706	9.19	0.432475	0.526884	0.153086	0.14999	0.919583	0.590659	1.09908	0.000556853	7.34122e-05	NA	K03549//KUP system potassium uptake protein	XP_021686906.1|0.0e+00|potassium transporter 6-like [Hevea brasiliensis]	GO:0071944//cell periphery;GO:0005886//plasma membrane;GO:0031224//intrinsic component of membrane;GO:0016021//integral component of membrane;GO:0110165//cellular anatomical entity;GO:0016020//membrane;GO:0046873//metal ion transmembrane transporter activity;GO:0022857//transmembrane transporter activity;GO:0015079//potassium ion transmembrane transporter activity;GO:0005215//transporter activity…
LOC110694190	XM_021871366.1,XM_021871367.1,XM_021871365.1,BGI_novel_T008645	16.98	8.936	10.293	6.736	0.611082	0.0479096	0.00301818	0.492267	0.335901	0.056615	1.49585	4.71148e-09	2.30715e-10	NA	K09648//mitochondrial inner membrane protease subunit 2 [EC:3.4.21.-]+ko03060//Protein export;K09648//mitochondrial inner membrane protease subunit 2 [EC:3.4.21.-]+ko03060//Protein export;K09648//mitochondrial inner membrane protease subunit 2 [EC:3.4.21.-]+ko03060//Protein export;K09648//mitochondrial inner membrane protease subunit 2 [EC:3.4.21.-]+ko03060//Protein export	XP_021727057.1|4.8e-194|uncharacterized protein LOC110694190 isoform X1 [Chenopodium quinoa]	GO:0016020//membrane;GO:0031224//intrinsic component of membrane;GO:0016021//integral component of membrane;GO:0110165//cellular anatomical entity;GO:0003676//nucleic acid binding;GO:0005488//binding;GO:0097159//organic cyclic compound binding;GO:1901363//heterocyclic compound binding;GO:0003723//RNA binding;
LOC110694207	XM_021871387.1	16.063	11.41	12.776	8.16	0.666312	0.444503	0.110745	0.554881	0.603344	0.168028	1.16334	0.0160848	0.00349909	NA	NA	XP_021727079.1|1.0e-93|uncharacterized protein LOC110694207 [Chenopodium quinoa]	NA
LOC110694216	BGI_novel_T008662,XM_021871399.1,XM_021871400.1,XM_021871398.1	12.25	7.906	6.476	6.353	0.11638	0.930129	0.76629	0.412398	0.708281	0.245146	1.15059	0.0050337	0.000904975	NA	K18693//diacylglycerol diphosphate phosphatase / phosphatidate phosphatase [EC:3.1.3.81 3.1.3.4]+ko01110//Biosynthesis of secondary metabolites+ko00564//Glycerophospholipid metabolism+ko00561//Glycerolipid metabolism;K18693//diacylglycerol diphosphate phosphatase / phosphatidate phosphatase [EC:3.1.3.81 3.1.3.4]+ko01110//Biosynthesis of secondary metabolites+ko00564//Glycerophospholipid metabolis…	XP_021727090.1|1.8e-176|putative lipid phosphate phosphatase 3, chloroplastic isoform X1 [Chenopodium quinoa]	GO:0071704//organic substance metabolic process;GO:0006629//lipid metabolic process;GO:0019637//organophosphate metabolic process;GO:0006793//phosphorus metabolic process;GO:0008152//metabolic process;GO:0006644//phospholipid metabolic process;GO:0006796//phosphate-containing compound metabolic process;GO:0009987//cellular process;GO:0044237//cellular metabolic process;GO:0044238//primary metabol…
LOC110694248	XM_021871428.1	2.146	0.51	0.843	0.583	0.526397	0.719526	0.308028	-0.051044	0.990247	0.925408	1.93835	0.00393792	0.000681329	NA	K03327//multidrug resistance protein, MATE family	XP_021727120.1|9.7e-255|protein DETOXIFICATION 16-like [Chenopodium quinoa]	GO:0031224//intrinsic component of membrane;GO:0110165//cellular anatomical entity;GO:0016020//membrane;GO:0016021//integral component of membrane;GO:0015297//antiporter activity;GO:0022804//active transmembrane transporter activity;GO:0042910//xenobiotic transmembrane transporter activity;GO:0005215//transporter activity;GO:0015291//secondary active transmembrane transporter activity;GO:0022857/…
LOC110694254	XM_021871433.1	61.46	20.983	19.906	17.883	0.245485	0.781409	0.375843	0.339581	0.682898	0.223499	1.98722	1.78927e-20	2.78998e-22	NA	K01177//beta-amylase [EC:3.2.1.2]+ko00500//Starch and sucrose metabolism	XP_021727125.1|0.0e+00|inactive beta-amylase 9-like [Chenopodium quinoa]	GO:0005975//carbohydrate metabolic process;GO:0043170//macromolecule metabolic process;GO:0005976//polysaccharide metabolic process;GO:0044238//primary metabolic process;GO:0009056//catabolic process;GO:1901575//organic substance catabolic process;GO:0000272//polysaccharide catabolic process;GO:0009057//macromolecule catabolic process;GO:0071704//organic substance metabolic process;GO:0016052//ca…
LOC110694312	XM_021871486.1	49.58	30.82	36.953	27.29	0.490801	0.24006	0.0360301	0.290998	0.637481	0.189601	1.07363	6.17663e-05	6.40019e-06	NA	NA	XP_021727178.1|5.3e-67|uncharacterized protein LOC110694312 [Chenopodium quinoa]	GO:0034613//cellular protein localization;GO:0046907//intracellular transport;GO:0009987//cellular process;GO:0051179//localization;GO:0051234//establishment of localization;GO:0071705//nitrogen compound transport;GO:0015833//peptide transport;GO:0008104//protein localization;GO:0006886//intracellular protein transport;GO:0033036//macromolecule localization;GO:0015031//protein transport;GO:004288…
LOC110694314	BGI_novel_T008680,BGI_novel_T008681,XM_021871488.1	3.606	1.986	2.506	1.69	0.607955	0.400139	0.0900673	0.327467	0.847618	0.398566	1.26313	0.0076255	0.00146206	NA	K07893//Ras-related protein Rab-6A;K07893//Ras-related protein Rab-6A;K07893//Ras-related protein Rab-6A	XP_021727180.1|3.3e-100|GTP-binding protein ypt1-like [Chenopodium quinoa]	GO:0032553//ribonucleotide binding;GO:0017076//purine nucleotide binding;GO:0043168//anion binding;GO:0032550//purine ribonucleoside binding;GO:0003924//GTPase activity;GO:1901363//heterocyclic compound binding;GO:0016818//hydrolase activity, acting on acid anhydrides, in phosphorus-containing anhydrides;GO:0032561//guanyl ribonucleotide binding;GO:1901265//nucleoside phosphate binding;GO:0005488…
LOC110694423	XM_021871594.1,XM_021871595.1	5.333	0.56	1.4	0.513	1.33006	0.0722825	0.00547693	0.211168	0.919583	0.624442	3.51778	2.67004e-31	2.18301e-33	NA	K01128//sphingomyelin phosphodiesterase acid-like 3 [EC:3.1.4.-];K01128//sphingomyelin phosphodiesterase acid-like 3 [EC:3.1.4.-]	XP_021727287.1|1.9e-229|uncharacterized protein LOC110694423 isoform X2 [Chenopodium quinoa]	NA
LOC110694444	XM_021871612.1	16.87	10.11	12.113	6.653	0.883076	0.0986362	0.00866708	0.67102	0.321577	0.0526533	1.51198	0.000104648	1.14441e-05	NA	K15255//ATP-dependent DNA helicase PIF1 [EC:3.6.4.12]	XP_021727304.1|1.2e-135|uncharacterized protein At1g66480-like [Chenopodium quinoa]	NA
LOC110694451	XM_021871623.1	1.823	0.443	1.1	0.543	0.948813	0.283623	0.0482418	-0.15538	0.947774	0.774245	1.83286	0.00112481	0.000163143	NA	K09509//DnaJ homolog subfamily B member 3;K09514//DnaJ homolog subfamily B member 8;K09512//DnaJ homolog subfamily B member 6	XP_021727315.1|3.8e-95|uncharacterized protein LOC110694451 [Chenopodium quinoa]	NA
LOC110694464	XM_021871639.1,XM_021871647.1	20.996	9.256	14.956	8.303	0.894217	0.0222144	0.00107945	0.249961	0.804561	0.34069	1.54607	6.83287e-15	1.74412e-16	NA	K03327//multidrug resistance protein, MATE family;K03327//multidrug resistance protein, MATE family	XP_021857962.1|2.9e-198|protein DETOXIFICATION 16-like [Spinacia oleracea]	GO:0110165//cellular anatomical entity;GO:0031224//intrinsic component of membrane;GO:0016021//integral component of membrane;GO:0016020//membrane;GO:0015297//antiporter activity;GO:0005215//transporter activity;GO:0042910//xenobiotic transmembrane transporter activity;GO:0022804//active transmembrane transporter activity;GO:0015291//secondary active transmembrane transporter activity;GO:0022857/…
LOC110694488	XM_021871664.1	15.063	9.253	8.53	5.726	0.640524	0.0952175	0.00820686	0.790326	0.00782604	0.000349565	1.60671	3.15991e-12	1.05259e-13	NA	K15503//serine/threonine-protein phosphatase 6 regulatory ankyrin repeat subunit B;K10380//ankyrin	XP_021727356.1|1.2e-295|ankyrin repeat-containing protein At2g01680-like [Chenopodium quinoa]	GO:0071944//cell periphery;GO:0016021//integral component of membrane;GO:0005886//plasma membrane;GO:0110165//cellular anatomical entity;GO:0016020//membrane;GO:0031224//intrinsic component of membrane;
LOC110694537	XM_021871718.1	271.373	92.7	260.013	124.13	1.06593	0.0518167	0.00339294	-0.262892	0.911556	0.526038	1.30754	0.007222	0.00137295	NA	NA	XP_021727410.1|3.9e-71|60 kDa jasmonate-induced protein-like [Chenopodium quinoa]	NA
LOC110694543	XM_021871724.1	3.62	0.776	1.18	0.546	0.960482	0.425267	0.101499	0.52419	0.845952	0.395873	2.70944	0.00010331	1.1274e-05	NA	K11423//histone-lysine N-methyltransferase SETD2 [EC:2.1.1.43]+ko00310//Lysine degradation	XP_021737242.1|3.8e-196|PKS-NRPS hybrid synthetase CHGG_01239-like [Chenopodium quinoa]	NA
LOC110694544	XM_021871729.1	0.976	0.393	0.376	0.503	-0.318434	0.842024	0.473626	-0.223132	0.919583	0.600115	1.14415	0.00578235	0.00106139	NA	K04733//interleukin-1 receptor-associated kinase 4 [EC:2.7.11.1];K12447//UDP-sugar pyrophosphorylase [EC:2.7.7.64]+ko00520//Amino sugar and nucleotide sugar metabolism+ko00040//Pentose and glucuronate interconversions+ko01100//Metabolic pathways+ko00052//Galactose metabolism+ko00053//Ascorbate and aldarate metabolism;K03260//translation initiation factor 4G+ko03013//RNA transport	XP_021727421.1|3.0e-132|uncharacterized protein LOC110694544 [Chenopodium quinoa]	GO:0031224//intrinsic component of membrane;GO:0110165//cellular anatomical entity;GO:0016020//membrane;GO:0016021//integral component of membrane;
LOC110694634	XM_021871791.1,XM_021871790.1	53.38	20.75	20.103	16.536	0.373449	0.551282	0.169404	0.422759	0.733259	0.266864	1.88424	1.51732e-38	8.02904e-41	NA	K14794//ribosomal RNA-processing protein 12;K14794//ribosomal RNA-processing protein 12	XP_021727482.1|0.0e+00|protein NUCLEAR FUSION DEFECTIVE 4-like isoform X1 [Chenopodium quinoa]	GO:0016020//membrane;GO:0110165//cellular anatomical entity;GO:0031224//intrinsic component of membrane;GO:0016021//integral component of membrane;
LOC110694658	XM_021871818.1	10.576	4.433	6.36	3.436	0.924225	0.0979294	0.00856869	0.462091	0.661573	0.207095	1.80752	9.68952e-07	6.83989e-08	NA	K00688//glycogen phosphorylase [EC:2.4.1.1]+ko01100//Metabolic pathways+ko00500//Starch and sucrose metabolism+ko01110//Biosynthesis of secondary metabolites	XP_021727510.1|7.3e-256|ACT domain-containing protein ACR6-like [Chenopodium quinoa]	NA
LOC110694666	BGI_novel_T008752,XM_021871828.1,BGI_novel_T008751	2.293	1.013	0.816	0.86	0.00582748	0.999966	0.987344	0.343614	0.797517	0.331562	1.61792	3.09054e-06	2.40817e-07	NA	NA	XP_021727520.1|0.0e+00|uncharacterized protein LOC110694666 [Chenopodium quinoa]	GO:0003676//nucleic acid binding;GO:1901363//heterocyclic compound binding;GO:0016893//endonuclease activity, active with either ribo- or deoxyribonucleic acids and producing 5'-phosphomonoesters;GO:0016787//hydrolase activity;GO:0004518//nuclease activity;GO:0004519//endonuclease activity;GO:0003824//catalytic activity;GO:0005488//binding;GO:0016891//endoribonuclease activity, producing 5'-phosp…
LOC110694676	XM_021871838.1	26.126	15.736	18.28	12.62	0.599396	0.159997	0.0185494	0.419499	0.603342	0.167998	1.25786	0.000125803	1.40615e-05	NA	K14686//solute carrier family 31 (copper transporter), member 1;K13993//HSP20 family protein+ko04141//Protein processing in endoplasmic reticulum	XP_021727530.1|5.0e-97|copper transporter 6-like [Chenopodium quinoa]	GO:0110165//cellular anatomical entity;GO:0016020//membrane;GO:0016021//integral component of membrane;GO:0031224//intrinsic component of membrane;GO:0005215//transporter activity;GO:0046873//metal ion transmembrane transporter activity;GO:0022890//inorganic cation transmembrane transporter activity;GO:0005375//copper ion transmembrane transporter activity;GO:0008324//cation transmembrane transpo…
LOC110694685	XM_021871852.1,XM_021871858.1,XM_021871866.1	4.543	1.47	2.54	1.203	1.06419	0.165333	0.0195372	0.357872	0.826167	0.369494	2.03946	3.37267e-05	3.28483e-06	NA	NA	XP_021727544.1|1.0e-217|uncharacterized protein LOC110694685 isoform X1 [Chenopodium quinoa]	NA
LOC110694698	XM_021871868.1,XM_021871867.1	28.513	20.206	19.153	12.49	0.679451	0.0996924	0.0088164	0.769693	0.171885	0.0200411	1.2925	1.04019e-19	1.73474e-21	NA	K13412//calcium-dependent protein kinase [EC:2.7.11.1]+ko04626//Plant-pathogen interaction;K13412//calcium-dependent protein kinase [EC:2.7.11.1]+ko04626//Plant-pathogen interaction	XP_021727559.1|0.0e+00|calcium-dependent protein kinase 28-like isoform X1 [Chenopodium quinoa]	GO:0005488//binding;GO:0017076//purine nucleotide binding;GO:0036094//small molecule binding;GO:0016301//kinase activity;GO:1901265//nucleoside phosphate binding;GO:0032555//purine ribonucleotide binding;GO:1901363//heterocyclic compound binding;GO:0016772//transferase activity, transferring phosphorus-containing groups;GO:0016773//phosphotransferase activity, alcohol group as acceptor;GO:0030554…
LOC110694699	BGI_novel_T008768,XM_021871869.1	6.206	6.873	5.946	5.536	0.2603	0.710483	0.296663	0.513587	0.16825	0.0194164	1.10482	1.87121e-06	1.398e-07	bHLH	NA	XP_021727561.1|1.4e-175|transcription factor bHLH121-like [Chenopodium quinoa]	NA
LOC110694715	XM_021871889.1	20.826	3.623	4.486	3.766	0.345498	0.781129	0.375489	0.0638818	0.952471	0.792859	2.66346	3.32774e-33	2.34546e-35	NA	K04733//interleukin-1 receptor-associated kinase 4 [EC:2.7.11.1]	XP_021727581.1|2.1e-201|thaumatin-like protein 1b [Chenopodium quinoa]	NA
LOC110694723	XM_021871898.1	29.8	13.653	17.903	11.193	0.733177	0.053576	0.00357835	0.397068	0.450807	0.0930272	1.61054	1.7705e-09	8.17844e-11	NA	K19366//spartin+ko04144//Endocytosis	XP_021727590.1|2.0e-270|protein EARLY-RESPONSIVE TO DEHYDRATION 7, chloroplastic-like [Chenopodium quinoa]	NA
LOC110694742	XM_021871915.1	52.7	36.433	26.13	23.073	0.255844	0.518565	0.148456	0.757986	0.00339479	0.000128209	1.40872	9.61296e-14	2.75811e-15	NA	K00921//1-phosphatidylinositol-3-phosphate 5-kinase [EC:2.7.1.150]+ko04145//Phagosome+ko01100//Metabolic pathways+ko04070//Phosphatidylinositol signaling system+ko00562//Inositol phosphate metabolism	XP_021727607.1|0.0e+00|protein FREE1-like [Chenopodium quinoa]	GO:0046872//metal ion binding;GO:0005488//binding;GO:0043167//ion binding;GO:0043169//cation binding;
LOC110694751	XM_021871925.1	2.833	0.42	0.99	0.523	0.897562	0.24891	0.0383335	-0.152171	0.946873	0.772122	2.5749	4.40067e-10	1.89155e-11	NA	K07088//uncharacterized protein	XP_021727617.1|8.2e-217|protein PIN-LIKES 1-like [Chenopodium quinoa]	GO:0051234//establishment of localization;GO:0055085//transmembrane transport;GO:0006810//transport;GO:0009987//cellular process;GO:0051179//localization;GO:0016021//integral component of membrane;GO:0031224//intrinsic component of membrane;GO:0016020//membrane;GO:0110165//cellular anatomical entity;
LOC110694752	XM_021871926.1	4.45	1.306	3.626	1.513	1.00723	0.390223	0.0860859	-0.0890142	0.971571	0.86775	1.66881	0.00272499	0.000446355	NA	K07088//uncharacterized protein	XP_021727618.1|1.3e-225|protein PIN-LIKES 3-like [Chenopodium quinoa]	NA
LOC110694764	XM_021871935.1	0.96	0.823	0.53	0.423	0.350379	0.866242	0.512921	0.929589	0.379035	0.0695665	1.30405	0.0467566	0.0125167	NA	K17604//zinc finger SWIM domain-containing protein 3	XP_021727627.1|5.1e-245|protein FAR-RED IMPAIRED RESPONSE 1-like [Chenopodium quinoa]	NA
LOC110694768	XM_021871939.1	60.31	35.336	43.886	31.23	0.521522	0.610404	0.208581	0.291256	0.895018	0.488957	1.12771	0.0389734	0.010003	NA	K13993//HSP20 family protein+ko04141//Protein processing in endoplasmic reticulum	XP_021727631.1|6.1e-93|18.1 kDa class I heat shock protein-like [Chenopodium quinoa]	NA
LOC110694802	XM_021871970.1	0.15	0	0.07	0.01	0.958807	0.550985	0.168941	-0.111501	0.919583	0.688571	2.42024	0.041559	0.0108163	NA	NA	XP_021727662.1|7.1e-305|uncharacterized protein LOC110694802 [Chenopodium quinoa]	NA
LOC110694803	XM_021871971.1	3.35	0.863	1.23	1.223	0.0889573	0.96061	0.856646	-0.328631	0.904834	0.510663	1.59124	0.00237907	0.000381592	NA	NA	XP_021727663.1|1.3e-60|uncharacterized protein LOC110694803 [Chenopodium quinoa]	NA
LOC110694887	XM_021872087.1	6.603	2.293	1.746	1.39	0.406588	0.535027	0.158566	0.777665	0.323698	0.0531803	2.43756	4.25834e-22	5.89192e-24	NA	K19613//leucine-rich repeat protein SHOC2;K15078//structure-specific endonuclease subunit SLX1 [EC:3.6.1.-]	XP_021727779.1|0.0e+00|putative disease resistance protein RGA3 [Chenopodium quinoa]	NA
LOC110694950	BGI_novel_T008821,XM_021872139.1	34.53	22.183	16.82	12.866	0.472142	0.438041	0.107477	0.871063	0.0358173	0.00230601	1.63531	1.85233e-14	4.92095e-16	NA	K10767//mRNA N6-methyladenine demethylase [EC:1.14.11.53];K10767//mRNA N6-methyladenine demethylase [EC:1.14.11.53]	XP_021727831.1|0.0e+00|uncharacterized protein LOC110694950 [Chenopodium quinoa]	NA
LOC110694980	XM_021872169.1,XM_021872168.1,BGI_novel_T008832,XM_021872167.1	17.336	11.336	14.08	9.003	0.713507	0.0177904	0.00080164	0.444567	0.1939	0.0240926	1.16824	1.44109e-08	7.61625e-10	NA	K16302//metal transporter CNNM;K16302//metal transporter CNNM;K16302//metal transporter CNNM;K16302//metal transporter CNNM	XP_021727859.1|0.0e+00|uncharacterized protein LOC110694980 isoform X1 [Chenopodium quinoa]	NA
LOC110695063	XM_021872257.1	4.816	0.99	2.1	0.553	1.44622	0.184455	0.023357	0.873483	0.255563	0.0363506	3.16458	9.21894e-12	3.22886e-13	NA	K01580//glutamate decarboxylase [EC:4.1.1.15]+ko00410//beta-Alanine metabolism+ko00250//Alanine, aspartate and glutamate metabolism+ko00430//Taurine and hypotaurine metabolism+ko01100//Metabolic pathways+ko00650//Butanoate metabolism+ko01110//Biosynthesis of secondary metabolites	XP_021727949.1|2.6e-290|glutamate decarboxylase 4-like [Chenopodium quinoa]	GO:0044237//cellular metabolic process;GO:0043648//dicarboxylic acid metabolic process;GO:0044238//primary metabolic process;GO:0071704//organic substance metabolic process;GO:0019752//carboxylic acid metabolic process;GO:0043436//oxoacid metabolic process;GO:1901605//alpha-amino acid metabolic process;GO:0044281//small molecule metabolic process;GO:1901564//organonitrogen compound metabolic proc…
LOC110695103	XM_021872315.1	22.92	15.34	17.96	12.826	0.563642	0.0157472	0.000684466	0.372967	0.305844	0.0483982	1.05864	4.83056e-08	2.77612e-09	NA	K22989//integral membrane protein GPR137	XP_021728007.1|3.5e-164|protein TOM THREE HOMOLOG 1-like [Chenopodium quinoa]	GO:0016021//integral component of membrane;GO:0031224//intrinsic component of membrane;GO:0110165//cellular anatomical entity;GO:0016020//membrane;
LOC110695108	XM_021872323.1	12.416	7.976	6.706	6.723	0.0742422	0.898091	0.682158	0.355916	0.664494	0.209624	1.10589	1.24257e-13	3.61633e-15	NA	K20027//palmitoyltransferase ZDHHC1/11 [EC:2.3.1.225]	XP_021728015.1|0.0e+00|probable protein S-acyltransferase 19 [Chenopodium quinoa]	GO:0051641//cellular localization;GO:0018193//peptidyl-amino acid modification;GO:0006464//cellular protein modification process;GO:0042158//lipoprotein biosynthetic process;GO:0006605//protein targeting;GO:0090150//establishment of protein localization to membrane;GO:1901566//organonitrogen compound biosynthetic process;GO:0033036//macromolecule localization;GO:1901576//organic substance biosynt…
LOC110695183	XM_021872402.1	8.846	5.146	3.336	2.71	0.361554	0.654784	0.245576	0.995785	0.0288141	0.00174088	1.89933	1.43627e-10	5.77173e-12	NA	K20725//MAP kinase substrate 1+ko04016//MAPK signaling pathway - plant	XP_021728094.1|1.3e-128|protein MKS1-like [Chenopodium quinoa]	NA
LOC110695185	XM_021872403.1	0.87	0.34	0.496	0.226	1.01219	0.309415	0.0563929	0.599781	0.722433	0.257249	2.0179	0.000340791	4.2585e-05	NA	K20241//WD repeat-containing protein 44	XP_021728095.1|0.0e+00|F-box/WD repeat-containing protein 1A-like [Chenopodium quinoa]	NA
LOC110695186	XM_021872404.1	10.303	6.54	7.22	5.526	0.423982	0.673689	0.26341	0.341501	0.792091	0.32394	1.09603	0.00561682	0.00102613	NA	K08332//vacuolar protein 8;K04733//interleukin-1 receptor-associated kinase 4 [EC:2.7.11.1]	XP_021728096.1|7.5e-241|U-box domain-containing protein 27-like [Chenopodium quinoa]	GO:0019787//ubiquitin-like protein transferase activity;GO:0003824//catalytic activity;GO:0140096//catalytic activity, acting on a protein;GO:0016740//transferase activity;GO:0004842//ubiquitin-protein transferase activity;
LOC110695192	XM_021872411.1	26.066	1.623	3.306	3.843	-0.101927	0.943322	0.802754	-0.993479	0.205322	0.0262944	2.90031	2.18769e-14	5.87357e-16	NA	K19040//E3 ubiquitin-protein ligase ATL10/75/76/77/78 [EC:2.3.2.27]	XP_021728103.1|1.2e-145|RING-H2 finger protein ATL78-like [Chenopodium quinoa]	NA
LOC110695207	XM_021872430.1	10.36	5.08	4.11	5.163	-0.224928	0.898091	0.603026	0.0905154	0.960184	0.819193	1.1807	0.0251889	0.0059472	NA	K17500//integrin-linked kinase-associated serine/threonine phosphatase 2C [EC:3.1.3.16];K06268//serine/threonine-protein phosphatase 2B regulatory subunit	XP_021728122.1|2.1e-205|WAT1-related protein At5g64700-like [Chenopodium quinoa]	GO:0016020//membrane;GO:0005886//plasma membrane;GO:0071944//cell periphery;GO:0031224//intrinsic component of membrane;GO:0016021//integral component of membrane;GO:0110165//cellular anatomical entity;GO:0005215//transporter activity;GO:0022857//transmembrane transporter activity;
LOC110695245	XM_021872494.1	125.903	37.18	36.003	20.39	0.878584	0.00813309	0.000288802	0.945197	0.0266245	0.00157943	2.80829	1.33072e-28	1.26403e-30	NA	K02941//large subunit ribosomal protein LP0+ko03010//Ribosome;K22733//magnesium transporter	XP_021728186.1|1.3e-297|uncharacterized protein At1g04910-like [Chenopodium quinoa]	GO:0005996//monosaccharide metabolic process;GO:0008152//metabolic process;GO:0044238//primary metabolic process;GO:0006004//fucose metabolic process;GO:0071704//organic substance metabolic process;GO:0044281//small molecule metabolic process;GO:0005975//carbohydrate metabolic process;GO:0019318//hexose metabolic process;GO:0016740//transferase activity;GO:0003824//catalytic activity;GO:0016757//…
LOC110695249	XM_021872497.1	1.05	0.44	0.666	0.266	1.21673	0.136724	0.0143385	0.740392	0.463895	0.098604	2.06251	4.95165e-05	5.03209e-06	NA	K20478//golgin subfamily B member 1	XP_021728189.1|0.0e+00|protein NETWORKED 2D-like [Chenopodium quinoa]	GO:0008092//cytoskeletal protein binding;GO:0003779//actin binding;GO:0005515//protein binding;GO:0005488//binding;
LOC110695262	XM_021872512.1,XM_021872510.1,XM_021872513.1	5.133	3.246	3.15	2.42	0.458272	0.527967	0.153585	0.529299	0.222312	0.0294344	1.28682	1.45703e-06	1.06297e-07	NA	K21444//poly(rC)-binding protein 3/4;K21444//poly(rC)-binding protein 3/4;K21444//poly(rC)-binding protein 3/4	XP_021728202.1|1.7e-310|KH domain-containing protein HEN4-like isoform X1 [Chenopodium quinoa]	NA
LOC110695265	XM_021872518.1	2.633	0.28	0.576	0.18	1.16034	0.395343	0.0882678	0.501432	0.875057	0.457327	3.14445	0.000786597	0.000108511	NA	K01662//1-deoxy-D-xylulose-5-phosphate synthase [EC:2.2.1.7]+ko00900//Terpenoid backbone biosynthesis+ko01100//Metabolic pathways+ko01110//Biosynthesis of secondary metabolites+ko00730//Thiamine metabolism	XP_021859037.1|0.0e+00|probable 1-deoxy-D-xylulose-5-phosphate synthase 2, chloroplastic [Spinacia oleracea]	GO:0006629//lipid metabolic process;GO:0016114//terpenoid biosynthetic process;GO:0071704//organic substance metabolic process;GO:1901576//organic substance biosynthetic process;GO:0044238//primary metabolic process;GO:0008610//lipid biosynthetic process;GO:0044255//cellular lipid metabolic process;GO:0009058//biosynthetic process;GO:0008152//metabolic process;GO:0006721//terpenoid metabolic proc…
LOC110695281	XM_021872535.1	26.766	14.06	16.603	12.116	0.491897	0.505555	0.140156	0.318554	0.722433	0.257213	1.35035	3.12872e-06	2.43928e-07	NA	K01381//saccharopepsin [EC:3.4.23.25];K01379//cathepsin D [EC:3.4.23.5];K00924//kinase [EC:2.7.1.-]	XP_021728227.1|0.0e+00|aspartyl protease family protein 1-like [Chenopodium quinoa]	GO:0140096//catalytic activity, acting on a protein;GO:0016787//hydrolase activity;GO:0004190//aspartic-type endopeptidase activity;GO:0070011//peptidase activity, acting on L-amino acid peptides;GO:0004175//endopeptidase activity;GO:0008233//peptidase activity;GO:0070001//aspartic-type peptidase activity;GO:0003824//catalytic activity;
LOC110695565	XM_021872781.1	15.17	11.913	12.476	7.263	0.841507	0.0193011	0.000889848	0.803223	0.0343644	0.00217784	1.27084	4.34658e-05	4.35685e-06	NA	K08332//vacuolar protein 8;K05857//phosphatidylinositol phospholipase C, delta [EC:3.1.4.11]+ko01100//Metabolic pathways+ko04070//Phosphatidylinositol signaling system+ko00562//Inositol phosphate metabolism	XP_021728473.1|8.5e-191|U-box domain-containing protein 4-like [Chenopodium quinoa]	NA
LOC110695577	XM_021872791.1	0.39	0.093	0.083	0.086	0.0407824	0.996754	0.953712	0.147754	0.963194	0.83805	2.01683	0.0218029	0.00500508	NA	K12153//phenylalanine N-monooxygenase [EC:1.14.14.40]+ko00966//Glucosinolate biosynthesis+ko01110//Biosynthesis of secondary metabolites+ko00460//Cyanoamino acid metabolism+ko01210//2-Oxocarboxylic acid metabolism;K14300//nuclear pore complex protein Nup133+ko03013//RNA transport	XP_021728483.1|0.0e+00|uncharacterized protein LOC110695577 [Chenopodium quinoa]	NA
LOC110695690	XM_021872923.1	0.83	0.266	0.48	0.15	1.29393	0.268264	0.0438282	0.707867	0.745574	0.278202	2.38514	0.00132644	0.000196819	NA	K14664//IAA-amino acid hydrolase [EC:3.5.1.-]	XP_021728615.1|5.7e-245|LOW QUALITY PROTEIN: IAA-amino acid hydrolase ILR1-like [Chenopodium quinoa]	GO:0003824//catalytic activity;GO:0016787//hydrolase activity;
LOC110695786	XM_021873019.1,BGI_novel_T000902,BGI_novel_T000901	51.84	26.563	39.656	27.9	0.507352	0.148601	0.0163971	-0.00313409	0.998482	0.989394	1.10351	0.000242078	2.91579e-05	NA	K13229//2,4-dihydroxy-1,4-benzoxazin-3-one-glucoside dioxygenase [EC:1.14.11.59]+ko00402//Benzoxazinoid biosynthesis;K06892//feruloyl-CoA ortho-hydroxylase [EC:1.14.11.-]+ko01110//Biosynthesis of secondary metabolites+ko00940//Phenylpropanoid biosynthesis;K13229//2,4-dihydroxy-1,4-benzoxazin-3-one-glucoside dioxygenase [EC:1.14.11.59]+ko00402//Benzoxazinoid biosynthesis;K13229//2,4-dihydroxy-1,4-…	XP_021728711.1|1.2e-226|1-aminocyclopropane-1-carboxylate oxidase homolog 4-like [Chenopodium quinoa]	GO:0043167//ion binding;GO:0003824//catalytic activity;GO:0005488//binding;GO:0016491//oxidoreductase activity;GO:0043169//cation binding;GO:0046872//metal ion binding;
LOC110695816	XM_021873042.1	0.55	0.026	0.076	0.04	0.387364	0.897239	0.572087	-0.098884	0.977346	0.884086	3.04559	0.0016224	0.000247665	NA	K22390//acid phosphatase type 7	XP_021728734.1|1.8e-258|probable purple acid phosphatase 20 [Chenopodium quinoa]	NA
LOC110695857	XM_021873082.1	2.433	0.88	0.78	0.796	0.0375082	0.995621	0.949667	0.200463	0.938411	0.747543	1.68112	0.0115704	0.00237809	NA	NA	XP_021728774.1|1.0e-130|uncharacterized protein LOC110695857 [Chenopodium quinoa]	NA
LOC110695881	XM_021873106.1	31.073	22.71	23.023	12.023	0.969437	0.0853623	0.00700203	0.968295	0.109056	0.0103511	1.5594	2.66666e-06	2.05533e-07	NA	K15104//solute carrier family 25 (mitochondrial oxoglutarate transporter), member 11	XP_021728798.1|1.3e-165|mitochondrial dicarboxylate/tricarboxylate transporter DTC-like [Chenopodium quinoa]	GO:0016020//membrane;GO:0031224//intrinsic component of membrane;GO:0110165//cellular anatomical entity;GO:0016021//integral component of membrane;GO:0022857//transmembrane transporter activity;GO:0015075//ion transmembrane transporter activity;GO:0015216//purine nucleotide transmembrane transporter activity;GO:0008509//anion transmembrane transporter activity;GO:0005215//transporter activity;GO:…
LOC110695906	XM_021873137.1	4.636	1.13	1.663	1.31	0.373699	0.782083	0.37632	-0.0973692	0.960785	0.822596	1.96203	2.28167e-06	1.73583e-07	NA	K11584//serine/threonine-protein phosphatase 2A regulatory subunit B'+ko03015//mRNA surveillance pathway;K13863//solute carrier family 7 (cationic amino acid transporter), member 1	XP_010673501.1|2.8e-244|PREDICTED: probable polyamine transporter At3g13620 [Beta vulgaris subsp. vulgaris]	GO:0110165//cellular anatomical entity;GO:0031224//intrinsic component of membrane;GO:0016020//membrane;GO:0016021//integral component of membrane;GO:0022857//transmembrane transporter activity;GO:0005215//transporter activity;
LOC110695936	XM_021873171.1,XM_021873170.1	11.353	8.26	7.463	5.443	0.535567	0.00422022	0.000126952	0.710873	0.000411163	1.06193e-05	1.27882	1.95185e-13	5.79066e-15	NA	NA	XP_021728862.1|0.0e+00|uncharacterized protein LOC110695936 [Chenopodium quinoa]	NA
LOC110695961	XM_021873204.1	0.286	0.176	0.223	0.076	1.40224	0.136019	0.0142112	1.06574	0.456269	0.0953941	2.03569	0.0044644	0.000789072	NA	K04733//interleukin-1 receptor-associated kinase 4 [EC:2.7.11.1]	XP_021728896.1|0.0e+00|G-type lectin S-receptor-like serine/threonine-protein kinase LECRK3 [Chenopodium quinoa]	NA
LOC110695975	XM_021873224.1	39.856	8.976	10.51	6.126	0.773941	0.339325	0.0662179	0.621524	0.464908	0.0989822	2.84129	4.08087e-18	7.8235e-20	NA	K00454//lipoxygenase [EC:1.13.11.12]+ko00591//Linoleic acid metabolism+ko00592//alpha-Linolenic acid metabolism+ko01100//Metabolic pathways+ko01110//Biosynthesis of secondary metabolites	XP_021728916.1|0.0e+00|linoleate 13S-lipoxygenase 2-1, chloroplastic-like [Chenopodium quinoa]	GO:0072330//monocarboxylic acid biosynthetic process;GO:0044249//cellular biosynthetic process;GO:0044238//primary metabolic process;GO:0044281//small molecule metabolic process;GO:0046394//carboxylic acid biosynthetic process;GO:0019752//carboxylic acid metabolic process;GO:0044255//cellular lipid metabolic process;GO:0032787//monocarboxylic acid metabolic process;GO:0044237//cellular metabolic …
LOC110695983	XM_021873237.1	1.016	0.31	0.58	0.25	1.19664	0.189698	0.0242855	0.375538	0.909644	0.523477	2.20371	3.92541e-05	3.89383e-06	NA	K10277//lysine-specific demethylase 8 [EC:1.14.11.27]	XP_021718898.1|2.5e-242|lysine-specific demethylase JMJ30-like [Chenopodium quinoa]	GO:0032259//methylation;GO:0008152//metabolic process;GO:0016740//transferase activity;GO:0003824//catalytic activity;GO:0008168//methyltransferase activity;GO:0016741//transferase activity, transferring one-carbon groups;
LOC110696011	XM_021873270.1,BGI_novel_T009068,XM_021873271.1	3.413	2.226	2.323	1.906	0.360713	0.448442	0.112634	0.346295	0.557649	0.142805	1.07386	1.71575e-06	1.27032e-07	NA	K17686//Cu+-exporting ATPase [EC:3.6.3.54]+ko04016//MAPK signaling pathway - plant;K17686//Cu+-exporting ATPase [EC:3.6.3.54]+ko04016//MAPK signaling pathway - plant;K17686//Cu+-exporting ATPase [EC:3.6.3.54]+ko04016//MAPK signaling pathway - plant	KNA19925.1|0.0e+00|hypothetical protein SOVF_057020 isoform B [Spinacia oleracea]	GO:0030001//metal ion transport;GO:0006811//ion transport;GO:0006810//transport;GO:0051179//localization;GO:0006812//cation transport;GO:0051234//establishment of localization;GO:0110165//cellular anatomical entity;GO:0016021//integral component of membrane;GO:0031224//intrinsic component of membrane;GO:0016020//membrane;GO:0097367//carbohydrate derivative binding;GO:0032553//ribonucleotide bindi…
LOC110696035	XM_021873299.1	44.26	22.736	28.7	15.35	0.953775	0.0513396	0.00334645	0.658743	0.245329	0.0342394	1.73476	3.34087e-15	8.31034e-17	NA	NA	XP_021728991.1|8.9e-124|chaperonin-like RbcX protein 2, chloroplastic [Chenopodium quinoa]	NA
LOC110696037	XM_021873301.1,XM_021873302.1,XM_021873303.1	13.303	8.52	9.846	6.203	0.735708	0.00961246	0.00036103	0.560952	0.201327	0.0255477	1.31979	5.51517e-11	2.11105e-12	NA	K08064//nuclear transcription factor Y, alpha;K08064//nuclear transcription factor Y, alpha;K08064//nuclear transcription factor Y, alpha	XP_021728993.1|5.8e-177|nuclear transcription factor Y subunit A-1-like isoform X1 [Chenopodium quinoa]	NA
LOC110696050	XM_021873318.1,XM_021873317.1	4.976	4.2	3.956	2.576	0.63835	0.577511	0.185828	0.719462	0.589454	0.159744	1.15552	0.000426378	5.46669e-05	NA	K09753//cinnamoyl-CoA reductase [EC:1.2.1.44]+ko01100//Metabolic pathways+ko01110//Biosynthesis of secondary metabolites+ko00940//Phenylpropanoid biosynthesis;K09753//cinnamoyl-CoA reductase [EC:1.2.1.44]+ko01100//Metabolic pathways+ko01110//Biosynthesis of secondary metabolites+ko00940//Phenylpropanoid biosynthesis	XP_021729009.1|2.1e-186|tetraketide alpha-pyrone reductase 1-like isoform X1 [Chenopodium quinoa]	GO:0003824//catalytic activity;
LOC110696056	XM_021873325.1,XM_021873324.1	28.756	11.943	8.86	6.68	0.46722	0.556078	0.171849	0.901974	0.107936	0.0102098	2.26057	6.43194e-08	3.77037e-09	NA	K00858//NAD+ kinase [EC:2.7.1.23]+ko01100//Metabolic pathways+ko00760//Nicotinate and nicotinamide metabolism;K00858//NAD+ kinase [EC:2.7.1.23]+ko01100//Metabolic pathways+ko00760//Nicotinate and nicotinamide metabolism	XP_021729016.1|9.5e-310|NAD(H) kinase 1-like isoform X1 [Chenopodium quinoa]	GO:0044281//small molecule metabolic process;GO:0009058//biosynthetic process;GO:0046496//nicotinamide nucleotide metabolic process;GO:0008152//metabolic process;GO:0006796//phosphate-containing compound metabolic process;GO:0034641//cellular nitrogen compound metabolic process;GO:0044271//cellular nitrogen compound biosynthetic process;GO:0009117//nucleotide metabolic process;GO:0009987//cellula…
LOC110696070	XM_021873341.1	0.62	0	0.08	0.026	0.573212	0.795505	0.407559	-0.198361	0.919583	0.582757	3.49947	0.000165978	1.91171e-05	NA	K14948//polypyrimidine tract-binding protein 2;K15382//solute carrier family 50 (sugar transporter)	XP_021729033.1|5.0e-162|uncharacterized protein LOC110696070 [Chenopodium quinoa]	GO:0110165//cellular anatomical entity;GO:0016021//integral component of membrane;GO:0016020//membrane;GO:0031224//intrinsic component of membrane;
LOC110696071	BGI_novel_T009086,XM_021873342.1,BGI_novel_T009087	2.31	0.583	0.746	0.403	0.718395	0.499633	0.137007	0.46491	0.835312	0.381202	2.52433	1.53559e-10	6.20751e-12	NA	NA	XP_021729034.1|7.8e-74|uncharacterized protein LOC110696071 [Chenopodium quinoa]	NA
LOC110696084	XM_021873363.1	12.126	6.106	7.766	6.28	0.374459	0.411688	0.0951796	0.0684291	0.948003	0.777013	1.16627	1.01154e-07	6.1073e-09	NA	K05391//cyclic nucleotide gated channel, plant+ko04626//Plant-pathogen interaction	XP_021729055.1|0.0e+00|cyclic nucleotide-gated ion channel 1-like [Chenopodium quinoa]	GO:0031224//intrinsic component of membrane;GO:0016021//integral component of membrane;GO:0016020//membrane;GO:0110165//cellular anatomical entity;GO:0015077//monovalent inorganic cation transmembrane transporter activity;GO:0005215//transporter activity;GO:0022890//inorganic cation transmembrane transporter activity;GO:0022803//passive transmembrane transporter activity;GO:0022832//voltage-gated…
LOC110696085	XM_021873364.1	0.47	0.186	0.31	0.153	0.982858	0.38445	0.0837535	0.370194	0.894186	0.486847	1.81933	0.000619016	8.28155e-05	NA	K06180//23S rRNA pseudouridine1911/1915/1917 synthase [EC:5.4.99.23];K17710//pentatricopeptide repeat domain-containing protein 1	XP_021729056.1|0.0e+00|pentatricopeptide repeat-containing protein At4g02750-like [Chenopodium quinoa]	GO:0090304//nucleic acid metabolic process;GO:0006139//nucleobase-containing compound metabolic process;GO:0034641//cellular nitrogen compound metabolic process;GO:0046483//heterocycle metabolic process;GO:0043412//macromolecule modification;GO:0006725//cellular aromatic compound metabolic process;GO:0044237//cellular metabolic process;GO:0006807//nitrogen compound metabolic process;GO:0009451//R…
LOC110696086	XM_021873365.1	42.983	16.773	25.033	14.803	0.81083	0.141863	0.0152374	0.289952	0.709362	0.246161	1.7213	2.53729e-08	1.39325e-09	NA	K00797//spermidine synthase [EC:2.5.1.16]+ko00410//beta-Alanine metabolism+ko00330//Arginine and proline metabolism+ko01100//Metabolic pathways+ko00270//Cysteine and methionine metabolism+ko00480//Glutathione metabolism	XP_021729057.1|3.7e-211|spermine synthase-like [Chenopodium quinoa]	GO:0006596//polyamine biosynthetic process;GO:0044271//cellular nitrogen compound biosynthetic process;GO:0006807//nitrogen compound metabolic process;GO:0044106//cellular amine metabolic process;GO:0008152//metabolic process;GO:0034641//cellular nitrogen compound metabolic process;GO:0006595//polyamine metabolic process;GO:0009987//cellular process;GO:1901566//organonitrogen compound biosyntheti…
LOC110696092	XM_021873370.1	8.633	0.463	1.89	0.393	1.17096	0.426375	0.101997	0.141271	0.964475	0.844479	3.79721	7.5156e-06	6.36799e-07	NA	NA	XP_021729062.1|3.4e-183|bark storage protein A-like [Chenopodium quinoa]	NA
LOC110696112	BGI_novel_T000912,XM_021873397.1	4.2	2.58	2.663	2.07	0.432453	0.406978	0.0930051	0.414929	0.685268	0.22594	1.22633	1.38543e-05	1.24359e-06	NA	K05747//Wiskott-Aldrich syndrome protein+ko04144//Endocytosis;K05747//Wiskott-Aldrich syndrome protein+ko04144//Endocytosis	XP_021729089.1|4.5e-236|protein CHUP1, chloroplastic-like [Chenopodium quinoa]	NA
LOC110696122	XM_021873408.1	9.343	3.85	3.91	2.98	0.442802	0.734297	0.32642	0.445516	0.78682	0.317449	1.77093	0.00096216	0.000136235	NA	NA	XP_021729100.1|1.8e-212|GDSL esterase/lipase At4g10955-like [Chenopodium quinoa]	GO:0071704//organic substance metabolic process;GO:0044238//primary metabolic process;GO:0008152//metabolic process;GO:0006629//lipid metabolic process;
LOC110696132	XM_021873420.1	0.556	0.346	0.316	0.256	0.348209	0.751657	0.344164	0.496866	0.626147	0.181539	1.2954	0.00359829	0.000613671	NA	K23113//structural maintenance of chromosomes flexible hinge domain-containing protein 1	XP_021729112.1|0.0e+00|uncharacterized protein LOC110696132 [Chenopodium quinoa]	NA
LOC110696241	XM_021873521.1	11.656	2.633	2.86	2.26	0.389517	0.717936	0.306118	0.313238	0.839132	0.386358	2.54371	4.20731e-13	1.28653e-14	NA	K15503//serine/threonine-protein phosphatase 6 regulatory ankyrin repeat subunit B	XP_021729213.1|3.1e-127|ankyrin repeat-containing protein BDA1-like [Chenopodium quinoa]	NA
LOC110696287	BGI_novel_T009128,XM_021873572.1,XM_021873571.1	50.516	31.743	43.346	29.96	0.606683	0.253539	0.0398202	0.238535	0.859219	0.419858	1.02245	0.00280776	0.000462287	NA	K04450//cyclic AMP-dependent transcription factor ATF-2;K09060//plant G-box-binding factor;K04450//cyclic AMP-dependent transcription factor ATF-2;K09060//plant G-box-binding factor;K04450//cyclic AMP-dependent transcription factor ATF-2;K09060//plant G-box-binding factor	XP_021729263.1|3.3e-208|basic leucine zipper 9-like isoform X1 [Chenopodium quinoa]	NA
LOC110696405	XM_021873693.1	10.3	1.603	1.666	0.703	0.704623	0.730768	0.32321	0.750253	0.76954	0.300658	3.48406	4.34842e-06	3.49677e-07	NA	K14488//SAUR family protein+ko04075//Plant hormone signal transduction	XP_021729385.1|4.1e-49|auxin-responsive protein SAUR41-like, partial [Chenopodium quinoa]	NA
LOC110696408	XM_021873696.1	5.55	0.966	0.383	0.1	0.42148	0.848987	0.484003	1.21638	0.445992	0.0913497	4.26866	2.81629e-06	2.18043e-07	NA	K14488//SAUR family protein+ko04075//Plant hormone signal transduction	XP_021729388.1|4.7e-63|auxin-responsive protein SAUR71-like [Chenopodium quinoa]	NA
LOC110696440	BGI_novel_T009181,XM_021873726.1,BGI_novel_T009179	4.553	1.933	2.553	1.54	0.792992	0.136403	0.0142721	0.419382	0.728365	0.261978	1.75155	1.29427e-06	9.36368e-08	NA	K05894//12-oxophytodienoic acid reductase [EC:1.3.1.42]+ko00592//alpha-Linolenic acid metabolism+ko01100//Metabolic pathways+ko01110//Biosynthesis of secondary metabolites;K05894//12-oxophytodienoic acid reductase [EC:1.3.1.42]+ko00592//alpha-Linolenic acid metabolism+ko01100//Metabolic pathways+ko01110//Biosynthesis of secondary metabolites;K05894//12-oxophytodienoic acid reductase [EC:1.3.1.42]…	XP_021729418.1|2.9e-119|12-oxophytodienoate reductase 1-like [Chenopodium quinoa]	NA
LOC110696491	XM_021873785.1	22.123	16.57	21.48	8.66	1.22433	0.153472	0.0172123	0.93149	0.371047	0.0668529	1.48479	0.0294635	0.00715964	NA	K10752//histone-binding protein RBBP4;K07213//copper chaperone	XP_021729477.1|6.7e-78|heavy metal-associated isoprenylated plant protein 24-like [Chenopodium quinoa]	GO:0051234//establishment of localization;GO:0030001//metal ion transport;GO:0051179//localization;GO:0006812//cation transport;GO:0006811//ion transport;GO:0006810//transport;GO:0043167//ion binding;GO:0046872//metal ion binding;GO:0005488//binding;GO:0043169//cation binding;
LOC110696584	XM_021873917.1,XM_021873918.1	20.573	1.016	2.746	1.03	1.21251	0.273044	0.0451653	0.0908901	0.970159	0.861967	4.28873	7.01093e-18	1.37743e-19	NA	NA	XP_021729609.1|4.0e-237|patatin-like protein 2 isoform X1 [Chenopodium quinoa]	NA
LOC110696616	XM_021873953.1,XM_021873954.1	17.863	7.69	8.87	5.856	0.670021	0.00866022	0.000314694	0.498747	0.143586	0.0152648	1.82267	2.39585e-22	3.2422e-24	NAC	K13126//polyadenylate-binding protein+ko03015//mRNA surveillance pathway+ko03018//RNA degradation+ko03013//RNA transport;K13126//polyadenylate-binding protein+ko03015//mRNA surveillance pathway+ko03018//RNA degradation+ko03013//RNA transport	XP_021729645.1|4.7e-163|NAC transcription factor 29-like [Chenopodium quinoa]	GO:0031326//regulation of cellular biosynthetic process;GO:0006355//regulation of transcription, DNA-templated;GO:0051252//regulation of RNA metabolic process;GO:0060255//regulation of macromolecule metabolic process;GO:0080090//regulation of primary metabolic process;GO:2000112//regulation of cellular macromolecule biosynthetic process;GO:0009889//regulation of biosynthetic process;GO:0031323//r…
LOC110696944	XM_021874282.1,XM_021874283.1	11.42	8.1	9.766	6.24	0.728597	0.000594696	1.20819e-05	0.486914	0.00449539	0.000179721	1.09492	3.89479e-07	2.59056e-08	NA	K15176//RNA polymerase-associated protein CTR9;K15176//RNA polymerase-associated protein CTR9	XP_021729974.1|0.0e+00|protein PLASTID MOVEMENT IMPAIRED 1-RELATED 1-like [Chenopodium quinoa]	GO:0006996//organelle organization;GO:0009987//cellular process;GO:0051656//establishment of organelle localization;GO:0051640//organelle localization;GO:0009658//chloroplast organization;GO:0016043//cellular component organization;GO:0009657//plastid organization;GO:0051234//establishment of localization;GO:0019750//chloroplast localization;GO:0051667//establishment of plastid localization;GO:00…
LOC110697003	XM_021874368.1	7.03	0.833	3.496	1.006	1.55324	0.0644441	0.00462861	-0.112793	0.96652	0.850584	2.73499	3.8448e-05	3.80553e-06	NA	K15502//serine/threonine-protein phosphatase 6 regulatory ankyrin repeat subunit A;K15503//serine/threonine-protein phosphatase 6 regulatory ankyrin repeat subunit B	XP_021730060.1|2.0e-183|alpha-latroinsectotoxin-Lt1a-like [Chenopodium quinoa]	NA
LOC110697036	XM_021874370.1,XM_021874367.1,XM_021874366.1,BGI_novel_T009307	4.593	2.663	2.686	1.686	0.741108	0.0471675	0.0029632	0.746591	0.14786	0.0159481	1.62792	1.86808e-06	1.39526e-07	NA	K01309//ubiquitin carboxyl-terminal hydrolase MINDY-1/2 [EC:3.4.19.12];K01309//ubiquitin carboxyl-terminal hydrolase MINDY-1/2 [EC:3.4.19.12];K01309//ubiquitin carboxyl-terminal hydrolase MINDY-1/2 [EC:3.4.19.12];K01309//ubiquitin carboxyl-terminal hydrolase MINDY-1/2 [EC:3.4.19.12]	XP_021730058.1|0.0e+00|uncharacterized protein LOC110697036 isoform X1 [Chenopodium quinoa]	GO:0097159//organic cyclic compound binding;GO:0003676//nucleic acid binding;GO:1901363//heterocyclic compound binding;GO:0005488//binding;
LOC110697065	XM_021874408.1	10.226	2.583	2.64	2.856	-0.0412374	0.965606	0.869508	-0.0286879	0.988313	0.918994	1.97071	0.000131532	1.47817e-05	NA	K21110//cingulin-like protein 1;K20478//golgin subfamily B member 1;K20283//golgin subfamily A member 4	XP_021730100.1|0.0e+00|uncharacterized protein PFB0145c-like [Chenopodium quinoa]	NA
LOC110697067	XM_021874410.1	57.02	30.076	41.39	25.216	0.789221	0.00120005	2.78072e-05	0.365624	0.447423	0.091878	1.39124	2.06329e-07	1.31688e-08	NA	K08360//cytochrome b-561 [EC:7.2.1.3]	XP_021730102.1|6.3e-128|transmembrane ascorbate ferrireductase 1-like [Chenopodium quinoa]	GO:0016020//membrane;GO:0110165//cellular anatomical entity;GO:0016021//integral component of membrane;GO:0031224//intrinsic component of membrane;GO:0016491//oxidoreductase activity;GO:0003824//catalytic activity;
LOC110697078	XM_021874419.1,XM_021874420.1	26.043	18.316	22.236	13.8	0.754032	0.0301996	0.00161745	0.512401	0.282663	0.042354	1.13375	3.16404e-05	3.06379e-06	NA	K16833//protein phosphatase inhibitor 2;K16833//protein phosphatase inhibitor 2	XP_021730111.1|1.5e-93|protein GLC8-like [Chenopodium quinoa]	GO:0009966//regulation of signal transduction;GO:0050794//regulation of cellular process;GO:0010646//regulation of cell communication;GO:0050789//regulation of biological process;GO:0048583//regulation of response to stimulus;GO:0065007//biological regulation;GO:0023051//regulation of signaling;GO:0019212//phosphatase inhibitor activity;GO:0004857//enzyme inhibitor activity;GO:0004864//protein ph…
LOC110697098	XM_021874472.1	1.343	0.163	0.67	0.31	0.872408	0.558611	0.173333	-0.491275	0.895018	0.488465	2.04997	0.0115901	0.00238432	NA	K15502//serine/threonine-protein phosphatase 6 regulatory ankyrin repeat subunit A;K15503//serine/threonine-protein phosphatase 6 regulatory ankyrin repeat subunit B;K00889//1-phosphatidylinositol-4-phosphate 5-kinase [EC:2.7.1.68]+ko04144//Endocytosis+ko01100//Metabolic pathways+ko04070//Phosphatidylinositol signaling system+ko00562//Inositol phosphate metabolism	XP_021730164.1|5.9e-149|uncharacterized protein LOC110697098 [Chenopodium quinoa]	NA
LOC110697103	XM_021874446.1	25.253	15.64	20.84	10.93	0.93029	0.162608	0.0190664	0.585128	0.564022	0.145834	1.39082	0.00161415	0.000246161	NA	K11968//ariadne-1 [EC:2.3.2.31]	XP_021730138.1|0.0e+00|probable E3 ubiquitin-protein ligase ARI8 [Chenopodium quinoa]	GO:0016740//transferase activity;GO:0019787//ubiquitin-like protein transferase activity;GO:0005488//binding;GO:0043169//cation binding;GO:0043167//ion binding;GO:0003824//catalytic activity;GO:0004842//ubiquitin-protein transferase activity;GO:0140096//catalytic activity, acting on a protein;GO:0046872//metal ion binding;
LOC110697155	XM_021874498.1	10.73	3.863	4.936	4.196	0.291614	0.759947	0.352566	-0.00104728	0.999292	0.996807	1.56811	3.08764e-09	1.47046e-10	NA	K04733//interleukin-1 receptor-associated kinase 4 [EC:2.7.11.1];K04730//interleukin-1 receptor-associated kinase 1 [EC:2.7.11.1]	XP_021730190.1|0.0e+00|receptor-like serine/threonine-protein kinase At4g25390 [Chenopodium quinoa]	GO:0016020//membrane;GO:0110165//cellular anatomical entity;GO:0016021//integral component of membrane;GO:0031224//intrinsic component of membrane;GO:0030554//adenyl nucleotide binding;GO:0043168//anion binding;GO:0000166//nucleotide binding;GO:0032555//purine ribonucleotide binding;GO:0036094//small molecule binding;GO:0017076//purine nucleotide binding;GO:0004672//protein kinase activity;GO:004…
LOC110697162	XM_021874506.1	31.983	10.663	11.036	8.026	0.477894	0.573471	0.183053	0.502171	0.33226	0.0555647	2.15581	1.15436e-10	4.59381e-12	NA	K20888//xyloglucan galactosyltransferase MUR3 [EC:2.4.1.-]	XP_021730198.1|1.1e-304|xyloglucan galactosyltransferase XLT2-like [Chenopodium quinoa]	GO:0044042//glucan metabolic process;GO:0043170//macromolecule metabolic process;GO:0043413//macromolecule glycosylation;GO:0044237//cellular metabolic process;GO:0009101//glycoprotein biosynthetic process;GO:0044238//primary metabolic process;GO:0071704//organic substance metabolic process;GO:0070589//cellular component macromolecule biosynthetic process;GO:1901135//carbohydrate derivative metab…
LOC110697170	XM_021874517.1	0.63	0.36	0.363	0.36	0.0894228	0.946518	0.81864	0.110936	0.956017	0.803916	1.00528	0.021001	0.00478946	NA	K15078//structure-specific endonuclease subunit SLX1 [EC:3.6.1.-]	XP_021730209.1|0.0e+00|putative disease resistance protein RGA1 [Chenopodium quinoa]	GO:0097159//organic cyclic compound binding;GO:1901265//nucleoside phosphate binding;GO:0030554//adenyl nucleotide binding;GO:0097367//carbohydrate derivative binding;GO:0032553//ribonucleotide binding;GO:0043167//ion binding;GO:0032555//purine ribonucleotide binding;GO:0036094//small molecule binding;GO:0000166//nucleotide binding;GO:0017076//purine nucleotide binding;GO:0005488//binding;GO:0032…
LOC110697190	XM_021874536.1	0.906	0.373	0.56	0.233	1.06235	0.355206	0.072118	0.616293	0.792091	0.323975	1.95269	0.00945445	0.00187987	NA	K20506//tuliposide A-converting enzyme [EC:4.2.99.22];K13258//2-hydroxyisoflavanone dehydratase [EC:4.2.1.105]+ko01110//Biosynthesis of secondary metabolites+ko00943//Isoflavonoid biosynthesis	XP_021730228.1|1.8e-178|probable carboxylesterase 5 [Chenopodium quinoa]	GO:0003824//catalytic activity;GO:0016787//hydrolase activity;
LOC110697195	XM_021874542.1	79.433	47.51	56.42	39.153	0.600254	0.054303	0.0036565	0.391637	0.348167	0.0599181	1.23858	5.36322e-08	3.10318e-09	NA	K10578//ubiquitin-conjugating enzyme E2 J1 [EC:2.3.2.23]+ko04141//Protein processing in endoplasmic reticulum+ko04120//Ubiquitin mediated proteolysis	XP_021730234.1|6.4e-172|ubiquitin-conjugating enzyme E2 32-like [Chenopodium quinoa]	GO:0110165//cellular anatomical entity;GO:0016021//integral component of membrane;GO:0031224//intrinsic component of membrane;GO:0016020//membrane;
LOC110697203	XM_021874552.1,XM_021874551.1	0.336	0.046	0.093	0	0.55408	0.714503	0.301756	0.117662	0.919583	0.678679	2.79091	0.0204035	0.00462506	NA	NA	XP_021730243.1|2.3e-99|outer envelope pore protein 16-2, chloroplastic-like isoform X1 [Chenopodium quinoa]	NA
LOC110697210	XM_021874562.1,XM_021874563.1,BGI_novel_T009340,BGI_novel_T009339,XM_021874561.1,XM_021874560.1	13.89	8.686	10.85	7.726	0.564535	0.00273191	7.50345e-05	0.279591	0.391916	0.0735255	1.06692	1.85776e-12	6.02317e-14	CAMTA	K21596//calmodulin-binding transcription activator;K21596//calmodulin-binding transcription activator;K21596//calmodulin-binding transcription activator;K21596//calmodulin-binding transcription activator;K21596//calmodulin-binding transcription activator;K21596//calmodulin-binding transcription activator	XP_021730253.1|0.0e+00|calmodulin-binding transcription activator 5-like isoform X2 [Chenopodium quinoa]	GO:0005488//binding;GO:1901363//heterocyclic compound binding;GO:0003677//DNA binding;GO:0003676//nucleic acid binding;GO:0097159//organic cyclic compound binding;
LOC110697217	XM_021874569.1,XM_021874568.1	2.59	1.426	1.76	1.413	0.396121	0.559328	0.173779	0.130346	0.919583	0.60594	1.08027	7.95367e-05	8.4456e-06	NA	K17964//leucine-rich PPR motif-containing protein, mitochondrial;K17964//leucine-rich PPR motif-containing protein, mitochondrial	XP_021730260.1|0.0e+00|putative pentatricopeptide repeat-containing protein At3g16890, mitochondrial [Chenopodium quinoa]	NA
LOC110697255	XM_021874618.1	119.87	75.656	79.686	48.726	0.77532	0.0839812	0.00685213	0.724046	0.283713	0.0426386	1.51096	3.62138e-12	1.21652e-13	NA	NA	XP_021730310.1|5.7e-60|protein PROTON GRADIENT REGULATION 5, chloroplastic-like [Chenopodium quinoa]	GO:0055114//oxidation-reduction process;GO:0009642//response to light intensity;GO:0009644//response to high light intensity;GO:0009416//response to light stimulus;GO:0019684//photosynthesis, light reaction;GO:0009628//response to abiotic stimulus;GO:0008152//metabolic process;GO:0009987//cellular process;GO:0050896//response to stimulus;GO:0022900//electron transport chain;GO:0015979//photosynth…
LOC110697266	BGI_novel_T009352,XM_021874631.1	184	108.276	151.603	101.496	0.626132	0.344625	0.0682263	0.205667	0.919583	0.553785	1.05498	0.037627	0.00959301	NA	NA	XP_021730323.1|1.7e-96|uncharacterized protein LOC110697266 [Chenopodium quinoa]	NA
LOC110697269	XM_021874634.1	55.896	39.876	37.246	27.383	0.47433	0.513724	0.145772	0.638046	0.084706	0.00729805	1.22161	0.000183516	2.14077e-05	NA	NA	XP_021730326.1|1.5e-87|universal stress protein PHOS32 [Chenopodium quinoa]	NA
LOC110697304	XM_021874678.1	8.3	2.133	1.736	1.733	0.0597804	0.967707	0.8752	0.379548	0.860106	0.422404	2.42564	5.46679e-13	1.68825e-14	WRKY	K12835//ATP-dependent RNA helicase DDX42 [EC:3.6.4.13]+ko03040//Spliceosome;K13424//WRKY transcription factor 33+ko04016//MAPK signaling pathway - plant+ko04626//Plant-pathogen interaction	XP_021730370.1|2.9e-258|probable WRKY transcription factor 23 [Chenopodium quinoa]	GO:0043226//organelle;GO:0005634//nucleus;GO:0043231//intracellular membrane-bounded organelle;GO:0005622//intracellular;GO:0043229//intracellular organelle;GO:0043227//membrane-bounded organelle;GO:0110165//cellular anatomical entity;GO:0097159//organic cyclic compound binding;GO:0003700//DNA-binding transcription factor activity;GO:0003676//nucleic acid binding;GO:0043565//sequence-specific DNA…
LOC110697362	XM_021874743.1	1.696	1.056	0.406	0.233	0.603918	0.783779	0.378244	1.496	0.231876	0.0313889	2.80575	8.38914e-06	7.1882e-07	NA	K18626//trichohyalin	XP_021730435.1|1.9e-263|vicilin-like antimicrobial peptides 2-2 [Chenopodium quinoa]	NA
LOC110697374	XM_021874756.1	3.076	0.606	0.61	0.1	1.27601	0.363195	0.0752517	1.50898	0.25244	0.0357129	4.24582	2.62893e-08	1.4487e-09	NA	K07953//GTP-binding protein SAR1 [EC:3.6.5.-]+ko04141//Protein processing in endoplasmic reticulum	XP_021730448.1|1.2e-121|GTP-binding protein SAR1A-like, partial [Chenopodium quinoa]	GO:0006886//intracellular protein transport;GO:0051234//establishment of localization;GO:0008104//protein localization;GO:0015833//peptide transport;GO:0051179//localization;GO:0071705//nitrogen compound transport;GO:0042886//amide transport;GO:0070727//cellular macromolecule localization;GO:0045184//establishment of protein localization;GO:0051649//establishment of localization in cell;GO:001503…
LOC110697411	XM_021874788.1	9.426	0.08	0.02	0	0.124653	0.898091	0.663408	0.886978	0.596541	0.163977	7.32875	1.07796e-19	1.80241e-21	AP2-EREBP	K09286//EREBP-like factor	XP_021730480.1|2.8e-133|dehydration-responsive element-binding protein 1A-like [Chenopodium quinoa]	GO:0043226//organelle;GO:0043231//intracellular membrane-bounded organelle;GO:0110165//cellular anatomical entity;GO:0043229//intracellular organelle;GO:0005634//nucleus;GO:0043227//membrane-bounded organelle;GO:0005622//intracellular;GO:0140110//transcription regulator activity;GO:0003677//DNA binding;GO:1901363//heterocyclic compound binding;GO:0097159//organic cyclic compound binding;GO:000370…
LOC110697417	XM_021874794.1	9.346	3.786	3.166	2.713	0.272392	0.881945	0.538651	0.545123	0.664811	0.209937	1.90561	0.000155819	1.78186e-05	NA	NA	XP_021730486.1|1.5e-102|jasmonate-induced protein homolog [Chenopodium quinoa]	NA
LOC110697420	XM_021874796.1	1.406	0.59	0.93	0.49	0.702	0.679214	0.269387	0.287514	0.919583	0.639855	1.56728	0.0302271	0.00737536	NA	K01051//pectinesterase [EC:3.1.1.11]+ko00040//Pentose and glucuronate interconversions+ko01100//Metabolic pathways	XP_021730488.1|3.2e-107|pectinesterase inhibitor 11-like [Chenopodium quinoa]	GO:0009641//shade avoidance;GO:0009314//response to radiation;GO:0009628//response to abiotic stimulus;GO:0050896//response to stimulus;GO:0009639//response to red or far red light;GO:0009416//response to light stimulus;GO:0004857//enzyme inhibitor activity;GO:0098772//molecular function regulator;GO:0030234//enzyme regulator activity;
LOC110697552	XM_021874918.1,XM_021874917.1	11.06	7.233	7.126	4.58	0.706977	0.00254223	6.84394e-05	0.760798	0.00106211	3.22245e-05	1.48557	6.29433e-14	1.77864e-15	NA	K19041//E3 ubiquitin-protein ligase RNF38/44 [EC:2.3.2.27];K10635//E3 ubiquitin-protein ligase Arkadia [EC:2.3.2.27];K19041//E3 ubiquitin-protein ligase RNF38/44 [EC:2.3.2.27];K10635//E3 ubiquitin-protein ligase Arkadia [EC:2.3.2.27]	XP_021730609.1|0.0e+00|probable E3 ubiquitin-protein ligase ZFP1 [Chenopodium quinoa]	NA
LOC110697682	XM_021875065.1	14.716	7.753	6.726	5.086	0.469291	0.301126	0.0536809	0.712051	0.017653	0.000933908	1.74173	1.55091e-14	4.08711e-16	NA	K04733//interleukin-1 receptor-associated kinase 4 [EC:2.7.11.1]	XP_021730757.1|6.7e-245|probable serine/threonine-protein kinase PBL19 [Chenopodium quinoa]	GO:0032555//purine ribonucleotide binding;GO:0036094//small molecule binding;GO:1901363//heterocyclic compound binding;GO:0032559//adenyl ribonucleotide binding;GO:1901265//nucleoside phosphate binding;GO:0016301//kinase activity;GO:0016772//transferase activity, transferring phosphorus-containing groups;GO:0043167//ion binding;GO:0005524//ATP binding;GO:0016773//phosphotransferase activity, alco…
LOC110697749	BGI_novel_T009426,XM_021875130.1,XM_021875127.1,XM_021875129.1,BGI_novel_T009425,XM_021875128.1	3.67	2.216	2.913	2.136	0.587084	0.352384	0.0709069	0.25207	0.871981	0.452141	1.1768	0.00149043	0.000225128	NA	K18626//trichohyalin	XP_021730819.1|1.7e-70|uncharacterized protein LOC110697749 isoform X1 [Chenopodium quinoa]	NA
LOC110697763	XM_021875142.1	4.763	3.266	3.22	1.696	0.907499	0.253097	0.0395694	0.937198	0.371848	0.0671704	1.63725	0.0015471	0.000234662	NA	K04733//interleukin-1 receptor-associated kinase 4 [EC:2.7.11.1]	XP_021730834.1|3.8e-113|GEM-like protein 1 [Chenopodium quinoa]	NA
LOC110697796	XM_021875175.1	67.373	46.4	56.296	23.743	1.21142	0.0568602	0.00388323	1.00446	0.1137	0.0109718	1.66611	0.000309213	3.82367e-05	NA	K14493//gibberellin receptor GID1 [EC:3.-.-.-]+ko04075//Plant hormone signal transduction	XP_021730867.1|2.2e-205|gibberellin receptor GID1B-like [Chenopodium quinoa]	GO:0003824//catalytic activity;GO:0016787//hydrolase activity;
LOC110697873	XM_021875283.1	1.516	0.666	1.37	0.256	1.71596	0.100786	0.00896143	1.03499	0.527302	0.126636	2.35787	0.00602016	0.00111275	MADS	K09264//MADS-box transcription factor, plant	XP_021730975.1|9.5e-142|MADS-box protein CMB1-like [Chenopodium quinoa]	GO:0080090//regulation of primary metabolic process;GO:0045935//positive regulation of nucleobase-containing compound metabolic process;GO:0031325//positive regulation of cellular metabolic process;GO:0019222//regulation of metabolic process;GO:0051171//regulation of nitrogen compound metabolic process;GO:0060255//regulation of macromolecule metabolic process;GO:1903506//regulation of nucleic aci…
LOC110697877	XM_021875284.1	1.19	0.013	0.3	0.1	1.03587	0.498333	0.136307	-0.924209	0.644118	0.194126	3.0607	0.000392735	4.99106e-05	NA	K03676//glutaredoxin 3	XP_021763016.1|1.6e-51|monothiol glutaredoxin-S1-like [Chenopodium quinoa]	NA
LOC110697883	XM_021875290.1	1.986	0.096	0.353	0.17	0.607603	0.78997	0.396917	-0.464116	0.90426	0.507191	3.22824	1.32298e-05	1.18151e-06	NA	K03676//glutaredoxin 3	XP_021730977.1|7.8e-47|monothiol glutaredoxin-S1-like [Chenopodium quinoa]	NA
LOC110697959	BGI_novel_T009469,XM_021875355.1	65.65	53.033	60.213	38.26	0.72801	0.137006	0.0143949	0.553608	0.385485	0.0714915	1.00139	3.64543e-08	2.05155e-09	NA	K14651//transcription initiation factor TFIID subunit 15+ko03022//Basal transcription factors;K12741//heterogeneous nuclear ribonucleoprotein A1/A3+ko03040//Spliceosome;K14651//transcription initiation factor TFIID subunit 15+ko03022//Basal transcription factors;K12741//heterogeneous nuclear ribonucleoprotein A1/A3+ko03040//Spliceosome	XP_021731047.1|1.5e-115|cold and drought-regulated protein CORA-like [Chenopodium quinoa]	NA
LOC110697981	BGI_novel_T009484,XM_021875379.1	12.43	4.72	4.986	4.136	0.339056	0.496919	0.135612	0.301933	0.754687	0.286841	1.77641	3.53601e-09	1.70317e-10	NA	K08999//uncharacterized protein;K08999//uncharacterized protein	XP_021731071.1|2.0e-198|bifunctional nuclease 2-like [Chenopodium quinoa]	GO:0016788//hydrolase activity, acting on ester bonds;GO:0004518//nuclease activity;GO:0016787//hydrolase activity;GO:0003824//catalytic activity;
LOC110697982	XM_021875381.1,XM_021875380.1	62.236	53.966	65.88	33.976	1.00427	0.0510737	0.00331881	0.775615	0.00195492	6.71495e-05	1.09241	2.47673e-07	1.60117e-08	NA	K01013//thiosulfate:glutathione sulfurtransferase [EC:2.8.1.-];K22547//arsenate reductase [EC:1.20.4.1];K01013//thiosulfate:glutathione sulfurtransferase [EC:2.8.1.-];K22547//arsenate reductase [EC:1.20.4.1]	XP_021731073.1|1.2e-82|thiosulfate sulfurtransferase 16, chloroplastic-like isoform X2 [Chenopodium quinoa]	NA
LOC110697996	XM_021875396.1	0.55	0.253	0.31	0.176	0.684165	0.682235	0.272805	0.473609	0.883309	0.471986	1.66122	0.0407102	0.0105397	NA	NA	XP_021731088.1|4.2e-65|uncharacterized protein LOC110697996 [Chenopodium quinoa]	NA
LOC110698016	XM_021875418.1	29.47	9.783	13.146	7.366	0.866726	0.171179	0.0207019	0.497633	0.621945	0.178972	2.11945	7.22098e-06	6.07921e-07	NA	K14638//solute carrier family 15 (peptide/histidine transporter), member 3/4	XP_021731110.1|0.0e+00|protein NRT1/ PTR FAMILY 4.6-like [Chenopodium quinoa]	GO:0016021//integral component of membrane;GO:0016020//membrane;GO:0110165//cellular anatomical entity;GO:0031224//intrinsic component of membrane;GO:0005215//transporter activity;GO:0022857//transmembrane transporter activity;
LOC110698031	XM_021875437.1	1.77	1.356	1.45	0.996	0.593372	0.34243	0.067456	0.518731	0.645804	0.194934	1.02897	0.0137358	0.00290646	NA	K14638//solute carrier family 15 (peptide/histidine transporter), member 3/4	XP_021731129.1|0.0e+00|protein NRT1/ PTR FAMILY 2.12-like [Chenopodium quinoa]	GO:0031224//intrinsic component of membrane;GO:0110165//cellular anatomical entity;GO:0016020//membrane;GO:0016021//integral component of membrane;GO:0005215//transporter activity;GO:0022857//transmembrane transporter activity;
LOC110698033	XM_021875439.1	5.776	3.34	4.216	2.726	0.669997	0.352042	0.0707767	0.381065	0.670659	0.214076	1.26081	0.000513518	6.7198e-05	NA	K12116//flavin-binding kelch repeat F-box protein 1+ko04712//Circadian rhythm - plant	XP_021731131.1|0.0e+00|adagio protein 3-like [Chenopodium quinoa]	NA
LOC110698040	XM_021875447.1	64.636	35.87	38.943	26.79	0.615503	0.159997	0.0185411	0.527512	0.1765	0.0208875	1.49085	2.56249e-15	6.30744e-17	NA	K09510//DnaJ homolog subfamily B member 4	XP_021731139.1|1.5e-190|dnaJ homolog subfamily B member 1-like [Chenopodium quinoa]	GO:0009987//cellular process;GO:0006457//protein folding;GO:0005488//binding;GO:0051082//unfolded protein binding;GO:0005515//protein binding;
LOC110698043	XM_021875449.1	21.953	7.963	8.45	6.403	0.444941	0.566021	0.177832	0.412637	0.608075	0.171184	1.96135	1.65441e-10	6.70933e-12	NA	K13122//protein FRG1	XP_021731141.1|1.3e-301|uncharacterized protein LOC110698043 [Chenopodium quinoa]	NA
LOC110698048	BGI_novel_T009507,XM_021875453.1,XM_021875452.1,BGI_novel_T009506	3.35	1.42	1.283	1.44	-0.10149	0.945927	0.814207	0.0546805	0.978291	0.886262	1.32555	0.000407777	5.20521e-05	NA	NA	XP_021773757.1|1.4e-108|uncharacterized protein LOC110737733 isoform X1 [Chenopodium quinoa]	NA
LOC110698063	XM_021875466.1,XM_021875467.1	90.043	27.906	27.073	18.966	0.586557	0.00455302	0.000139543	0.658356	0.0718174	0.00579616	2.45741	2.85146e-50	8.78114e-53	NA	NA	XP_021731159.1|3.6e-291|uncharacterized protein LOC110698063 isoform X2 [Chenopodium quinoa]	NA
LOC110698064	XM_021875470.1	11.793	8.08	7.896	5.416	0.613539	0.0593919	0.00411735	0.677409	0.0439133	0.00300618	1.3343	2.80156e-09	1.32572e-10	NA	K11274//chromosome transmission fidelity protein 4;K11982//E3 ubiquitin-protein ligase RNF115/126 [EC:2.3.2.27];K22378//E3 ubiquitin-protein ligase RNF181 [EC:2.3.2.27]	XP_021731162.1|4.9e-277|uncharacterized protein LOC110698064 [Chenopodium quinoa]	NA
LOC110698065	XM_021875468.1	4.583	2.563	2.293	2.44	-0.0129306	0.999966	0.970218	0.172162	0.919583	0.600464	1.10059	0.00401789	0.000697605	bHLH	K16190//glucuronokinase [EC:2.7.1.43]+ko00520//Amino sugar and nucleotide sugar metabolism+ko00040//Pentose and glucuronate interconversions+ko01100//Metabolic pathways+ko00053//Ascorbate and aldarate metabolism;K13422//transcription factor MYC2+ko04016//MAPK signaling pathway - plant+ko04075//Plant hormone signal transduction	XP_021731160.1|7.6e-290|transcription factor ICE1-like [Chenopodium quinoa]	GO:0005488//binding;GO:0046983//protein dimerization activity;GO:0005515//protein binding;
LOC110698092	XM_021875495.1	35.91	15.98	12.686	12.453	0.11114	0.829085	0.454619	0.462954	0.20866	0.0268865	1.74821	1.62906e-30	1.37784e-32	NA	K20893//probable galacturonosyltransferase-like 1 [EC:2.4.1.-]	XP_021731187.1|2.7e-234|probable galacturonosyltransferase-like 8 [Chenopodium quinoa]	GO:0016757//transferase activity, transferring glycosyl groups;GO:0003824//catalytic activity;GO:0016740//transferase activity;
LOC110698113	XM_021875515.1	253.47	134.383	180.91	112.5	0.715329	0.113186	0.0106869	0.362897	0.717165	0.252824	1.36524	9.07286e-05	9.77707e-06	NA	NA	XP_021731207.1|3.2e-107|PLAT domain-containing protein 3-like [Chenopodium quinoa]	NA
LOC110698121	XM_021875532.1	2.94	0.78	1.473	0.653	1.04012	0.313863	0.0577167	0.308743	0.919583	0.600091	2.20844	0.000434823	5.58818e-05	NA	K15296//alpha-soluble NSF attachment protein	XP_021731224.1|2.6e-158|alpha-soluble NSF attachment protein 2-like [Chenopodium quinoa]	GO:0006810//transport;GO:0008104//protein localization;GO:0015031//protein transport;GO:0034613//cellular protein localization;GO:0051641//cellular localization;GO:0009987//cellular process;GO:0046907//intracellular transport;GO:0051179//localization;GO:0071705//nitrogen compound transport;GO:0033036//macromolecule localization;GO:0045184//establishment of protein localization;GO:0071702//organic…
LOC110698126	XM_021875537.1	48.243	33.903	31.68	20.64	0.684982	0.0916037	0.00774763	0.808925	0.0218759	0.0012268	1.43527	1.74397e-07	1.09946e-08	NA	K12182//hepatocyte growth factor-regulated tyrosine kinase substrate+ko04144//Endocytosis+ko04145//Phagosome;K13141//integrator complex subunit 4	XP_021731229.1|0.0e+00|TOM1-like protein 6 [Chenopodium quinoa]	GO:0033036//macromolecule localization;GO:0051179//localization;GO:0051649//establishment of localization in cell;GO:0015031//protein transport;GO:0051641//cellular localization;GO:0051234//establishment of localization;GO:0008104//protein localization;GO:0042886//amide transport;GO:0046907//intracellular transport;GO:0034613//cellular protein localization;GO:0070727//cellular macromolecule local…
LOC110698161	XM_021875567.1	0.72	0.406	0.426	0.18	1.21466	0.157602	0.018027	1.10899	0.366878	0.0654689	2.06838	0.00723632	0.00137583	NA	K01537//Ca2+-transporting ATPase [EC:3.6.3.8];K04125//gibberellin 2beta-dioxygenase [EC:1.14.11.13]+ko00904//Diterpenoid biosynthesis+ko01110//Biosynthesis of secondary metabolites;K05666//ATP-binding cassette, subfamily C (CFTR/MRP), member 2+ko02010//ABC transporters;K03686//molecular chaperone DnaJ	XP_021731259.1|0.0e+00|uncharacterized protein LOC110698161 [Chenopodium quinoa]	GO:0006139//nucleobase-containing compound metabolic process;GO:0015074//DNA integration;GO:0043170//macromolecule metabolic process;GO:0044260//cellular macromolecule metabolic process;GO:0046483//heterocycle metabolic process;GO:0006807//nitrogen compound metabolic process;GO:0009987//cellular process;GO:0006259//DNA metabolic process;GO:0044237//cellular metabolic process;GO:0071704//organic s…
LOC110698253	XM_021875652.1	6.786	3.073	3.86	2.883	0.463093	0.600396	0.20143	0.200252	0.919583	0.596212	1.42024	0.000203715	2.40424e-05	NA	K13448//calcium-binding protein CML+ko04626//Plant-pathogen interaction	XP_021731344.1|6.8e-79|probable calcium-binding protein CML15 [Chenopodium quinoa]	GO:0043169//cation binding;GO:0005509//calcium ion binding;GO:0005488//binding;GO:0046872//metal ion binding;GO:0043167//ion binding;
LOC110698273	XM_021875666.1	306.45	207.26	196.7	153.316	0.381718	0.746256	0.338373	0.529597	0.486674	0.108616	1.19771	1.50103e-05	1.35614e-06	NA	K03098//apolipoprotein D and lipocalin family protein	XP_021731358.1|1.6e-110|temperature-induced lipocalin-1-like [Chenopodium quinoa]	NA
LOC110698285	XM_021875686.1,XM_021875684.1	12.21	6.8	7.893	6.13	0.449318	0.306732	0.055369	0.26222	0.708548	0.245464	1.21512	1.22037e-06	8.76816e-08	NA	K19044//E3 ubiquitin-protein ligase XBAT32/33 [EC:2.3.2.27];K19044//E3 ubiquitin-protein ligase XBAT32/33 [EC:2.3.2.27]	XP_021731376.1|4.6e-302|E3 ubiquitin-protein ligase XBAT32-like [Chenopodium quinoa]	NA
LOC110698290	BGI_novel_T009535,XM_021875695.1	1.323	0.386	0.303	0.226	0.251608	0.902611	0.69234	0.549255	0.844075	0.393641	2.47557	0.000121818	1.35633e-05	NA	K17500//integrin-linked kinase-associated serine/threonine phosphatase 2C [EC:3.1.3.16];K17500//integrin-linked kinase-associated serine/threonine phosphatase 2C [EC:3.1.3.16]	XP_021731387.1|8.6e-176|WAT1-related protein At4g30420-like [Chenopodium quinoa]	GO:0031224//intrinsic component of membrane;GO:0016021//integral component of membrane;GO:0016020//membrane;GO:0110165//cellular anatomical entity;GO:0022857//transmembrane transporter activity;GO:0005215//transporter activity;
LOC110698296	XM_021875702.1	71.596	25.043	37.72	36.016	0.140999	0.898091	0.671348	-0.384812	0.644188	0.194196	1.18718	0.00194897	0.000303815	NA	K12121//phytochrome B+ko04712//Circadian rhythm - plant	XP_026400747.1|4.6e-40|glycine-rich cell wall structural protein 2-like [Papaver somniferum]	NA
LOC110698299	XM_021875705.1	43.55	11.323	16.083	11.803	0.518521	0.586957	0.192164	0.0622534	0.954036	0.797705	2.0703	2.3248e-12	7.62815e-14	NA	K01674//carbonic anhydrase [EC:4.2.1.1]+ko00910//Nitrogen metabolism;K01179//endoglucanase [EC:3.2.1.4]+ko01100//Metabolic pathways+ko00500//Starch and sucrose metabolism	XP_024965700.1|3.0e-34|putative glycine-rich cell wall structural protein 1 [Cynara cardunculus var. scolymus]	NA
LOC110698322	XM_021875735.1	1.303	0.113	0.06	0.02	0.182248	0.905939	0.6992	0.368663	0.897564	0.494443	4.47023	4.97869e-07	3.37412e-08	NA	NA	XP_021731427.1|1.7e-111|uncharacterized protein LOC110698322 [Chenopodium quinoa]	NA
LOC110698432	XM_021875854.1	39.91	23.756	26.65	17.75	0.642331	0.184077	0.023297	0.517839	0.345885	0.0592525	1.37649	5.63201e-06	4.63767e-07	NA	NA	XP_021731546.1|5.2e-257|uncharacterized protein LOC110698432 [Chenopodium quinoa]	NA
LOC110698453	XM_021875885.1,BGI_novel_T009587,BGI_novel_T009586	26.543	25.356	25.613	13.906	0.932326	0.117023	0.0112705	0.979095	0.0031875	0.000119054	1.15329	0.000186837	2.18438e-05	NA	NA	XP_021731577.1|1.2e-94|uncharacterized protein LOC110698453 [Chenopodium quinoa]	NA
LOC110698466	XM_021875904.1,XM_021875903.1	23.656	10.06	14.313	10.226	0.595289	0.0994392	0.00878316	0.134371	0.899523	0.497202	1.44995	2.33289e-17	4.78103e-19	NA	NA	XP_021731595.1|2.4e-168|uncharacterized protein At1g01500-like [Chenopodium quinoa]	GO:0031224//intrinsic component of membrane;GO:0016020//membrane;GO:0016021//integral component of membrane;GO:0110165//cellular anatomical entity;
LOC110698467	XM_021875905.1	24	19.54	17.64	13.373	0.471608	0.259587	0.0415735	0.647283	0.0525211	0.00384051	1.05385	0.00022726	2.71955e-05	NA	K18422//helicase MOV-10 [EC:3.6.4.13];K04733//interleukin-1 receptor-associated kinase 4 [EC:2.7.11.1]	XP_021731597.1|4.8e-270|BTB/POZ domain-containing protein At3g05675-like [Chenopodium quinoa]	NA
LOC110698469	XM_021875906.1	26.586	11.17	15.906	11.063	0.557858	0.297194	0.0523386	0.127186	0.919583	0.655194	1.44723	0.000774978	0.000106752	NA	K04733//interleukin-1 receptor-associated kinase 4 [EC:2.7.11.1]	XP_021731598.1|1.0e-263|probable receptor-like serine/threonine-protein kinase At4g34500 [Chenopodium quinoa]	GO:0016020//membrane;GO:0031224//intrinsic component of membrane;GO:0110165//cellular anatomical entity;GO:0016021//integral component of membrane;GO:0000166//nucleotide binding;GO:0097367//carbohydrate derivative binding;GO:0043167//ion binding;GO:0016773//phosphotransferase activity, alcohol group as acceptor;GO:1901363//heterocyclic compound binding;GO:0017076//purine nucleotide binding;GO:003…
LOC110698470	XM_021875907.1,XM_021875908.1	39.843	15.043	18.81	11.42	0.775057	0.0401216	0.00235176	0.501414	0.189468	0.0232744	2.00966	1.87139e-18	3.49432e-20	NA	K19891//glucan endo-1,3-beta-glucosidase 1/2/3 [EC:3.2.1.39]+ko00500//Starch and sucrose metabolism;K19891//glucan endo-1,3-beta-glucosidase 1/2/3 [EC:3.2.1.39]+ko00500//Starch and sucrose metabolism	XP_021731599.1|0.0e+00|glucan endo-1,3-beta-D-glucosidase-like [Chenopodium quinoa]	NA
LOC110698498	XM_021875939.1	3.353	0.85	0.746	0.886	-0.180403	0.898091	0.643704	0.058044	0.981661	0.897531	2.08115	2.69302e-09	1.27026e-10	NA	K04733//interleukin-1 receptor-associated kinase 4 [EC:2.7.11.1]	XP_021731631.1|1.7e-204|UPF0496 protein At4g34320-like [Chenopodium quinoa]	GO:0031224//intrinsic component of membrane;GO:0016020//membrane;GO:0016021//integral component of membrane;GO:0110165//cellular anatomical entity;
LOC110698519	XM_021875962.1	16.386	0.9	1.223	0.26	1.59333	0.153262	0.0171801	1.3631	0.268736	0.0391074	5.78362	5.02436e-30	4.36939e-32	NA	K10395//kinesin family member 4/21/27;K14439//SWI/SNF-related matrix-associated actin-dependent regulator of chromatin subfamily A containing DEAD/H box 1 [EC:3.6.4.12]	XP_021731654.1|9.7e-125|late embryogenesis abundant protein 76-like [Chenopodium quinoa]	NA
LOC110698522	XM_021875966.1	4.11	3.316	2.81	2.006	0.539754	0.56564	0.177616	0.778668	0.304456	0.048007	1.21296	0.0249218	0.00586738	NA	K03283//heat shock 70kDa protein 1/2/6/8+ko03040//Spliceosome+ko04144//Endocytosis+ko04141//Protein processing in endoplasmic reticulum	XP_021731658.1|9.8e-152|uncharacterized protein LOC110698522 [Chenopodium quinoa]	GO:0050896//response to stimulus;GO:0065007//biological regulation;GO:0009987//cellular process;GO:0007165//signal transduction;GO:0035556//intracellular signal transduction;GO:0007154//cell communication;GO:0050789//regulation of biological process;GO:0051716//cellular response to stimulus;GO:0050794//regulation of cellular process;GO:0023052//signaling;
LOC110698531	XM_021875973.1,XM_021875974.1,XM_021875975.1,XM_021875976.1	43.36	21.036	22.19	23.4	0.00774859	0.999966	0.971153	-0.036721	0.961962	0.832384	1.10952	3.3622e-07	2.221e-08	NA	K12189//ESCRT-II complex subunit VPS25+ko04144//Endocytosis;K03251//translation initiation factor 3 subunit D+ko03013//RNA transport;K12189//ESCRT-II complex subunit VPS25+ko04144//Endocytosis;K03251//translation initiation factor 3 subunit D+ko03013//RNA transport;K12189//ESCRT-II complex subunit VPS25+ko04144//Endocytosis;K03251//translation initiation factor 3 subunit D+ko03013//RNA transport;…	XP_021731665.1|5.4e-111|cold-regulated 413 plasma membrane protein 2-like [Chenopodium quinoa]	GO:0031224//intrinsic component of membrane;GO:0110165//cellular anatomical entity;GO:0016020//membrane;GO:0016021//integral component of membrane;
LOC110698532	XM_021875977.1	2.586	0.683	0.623	0.456	0.519517	0.702479	0.289999	0.649644	0.668756	0.212585	2.70404	5.98975e-12	2.06019e-13	NA	K01723//hydroperoxide dehydratase [EC:4.2.1.92]+ko00592//alpha-Linolenic acid metabolism+ko01100//Metabolic pathways+ko01110//Biosynthesis of secondary metabolites	XP_021731669.1|2.7e-296|allene oxide synthase 3-like [Chenopodium quinoa]	GO:0005488//binding;GO:0005506//iron ion binding;GO:0004497//monooxygenase activity;GO:0003824//catalytic activity;GO:1901363//heterocyclic compound binding;GO:0046914//transition metal ion binding;GO:0046906//tetrapyrrole binding;GO:0043169//cation binding;GO:0046872//metal ion binding;GO:0097159//organic cyclic compound binding;GO:0016491//oxidoreductase activity;GO:0043167//ion binding;GO:0020…
LOC110698548	XM_021875992.1	49.196	21.763	20.153	13.793	0.554047	0.533566	0.157249	0.725699	0.254425	0.0360885	1.98974	6.13884e-08	3.58657e-09	NA	K20893//probable galacturonosyltransferase-like 1 [EC:2.4.1.-]	XP_021731684.1|2.4e-207|probable galacturonosyltransferase-like 1 [Chenopodium quinoa]	GO:0003824//catalytic activity;GO:0016757//transferase activity, transferring glycosyl groups;GO:0016740//transferase activity;
LOC110698561	XM_021876006.1	0.87	0.376	0.24	0.22	0.131237	0.955528	0.844658	0.674154	0.746991	0.279564	1.9785	0.00437624	0.000770452	NA	K06892//feruloyl-CoA ortho-hydroxylase [EC:1.14.11.-]+ko01110//Biosynthesis of secondary metabolites+ko00940//Phenylpropanoid biosynthesis;K05278//flavonol synthase [EC:1.14.20.6]+ko01100//Metabolic pathways+ko01110//Biosynthesis of secondary metabolites+ko00941//Flavonoid biosynthesis	XP_021731698.1|2.9e-209|protein DMR6-LIKE OXYGENASE 2-like [Chenopodium quinoa]	GO:0016491//oxidoreductase activity;GO:0046872//metal ion binding;GO:0043169//cation binding;GO:0043167//ion binding;GO:0003824//catalytic activity;GO:0005488//binding;
LOC110698571	XM_021876020.1	15.19	6.293	7.803	6.306	0.359332	0.546995	0.166406	0.109852	0.919583	0.630598	1.47938	1.37012e-12	4.3649e-14	G2-like	K14491//two-component response regulator ARR-B family+ko04075//Plant hormone signal transduction	XP_021731712.1|2.0e-232|transcription factor HHO6-like [Chenopodium quinoa]	GO:0043229//intracellular organelle;GO:0005622//intracellular;GO:0005634//nucleus;GO:0043226//organelle;GO:0043227//membrane-bounded organelle;GO:0043231//intracellular membrane-bounded organelle;GO:0110165//cellular anatomical entity;GO:1901363//heterocyclic compound binding;GO:0097159//organic cyclic compound binding;GO:0003677//DNA binding;GO:0005488//binding;GO:0003676//nucleic acid binding;
LOC110698577	XM_021876031.1	20.886	9.486	13.006	4.856	1.10122	0.355109	0.0720822	0.969187	0.203535	0.0259496	2.07398	0.00254755	0.000413201	NA	K12875//apoptotic chromatin condensation inducer in the nucleus+ko03040//Spliceosome+ko03015//mRNA surveillance pathway+ko03013//RNA transport;K01179//endoglucanase [EC:3.2.1.4]+ko01100//Metabolic pathways+ko00500//Starch and sucrose metabolism	XP_021731723.1|1.4e-183|fibrinogen alpha-1 chain-like [Chenopodium quinoa]	GO:0003824//catalytic activity;GO:0009055//electron transfer activity;GO:0016491//oxidoreductase activity;
LOC110698591	XM_021876051.1	6.773	0.033	6.55	0.016	0.666948	0.643087	0.235039	0.123978	0.9512	0.788814	5.86528	1.11093e-10	4.41377e-12	NA	NA	XP_021731743.1|2.1e-182|uncharacterized protein LOC110698591 [Chenopodium quinoa]	NA
LOC110698602	XM_021876062.1	3.223	0.09	1.746	0.053	1.89667	0.0930743	0.00792273	0.278863	0.919583	0.687148	3.98147	0.000112347	1.23821e-05	NA	NA	XP_021731754.1|6.1e-179|uncharacterized protein LOC110698602 [Chenopodium quinoa]	NA
LOC110698605	BGI_novel_T009626,XM_021876065.1	23.87	15.223	11.89	11.97	0.0899158	0.898091	0.677125	0.469441	0.419427	0.0820469	1.21481	8.48575e-06	7.27466e-07	NA	NA	XP_021731757.1|1.8e-107|uncharacterized protein LOC110698605 [Chenopodium quinoa]	NA
LOC110698643	XM_021876122.1	33.216	18.54	20.523	15.9	0.45262	0.176231	0.0217017	0.339169	0.284554	0.0428141	1.28634	4.08663e-16	9.24368e-18	NA	NA	XP_021731814.1|2.7e-148|uncharacterized protein LOC110698643 [Chenopodium quinoa]	NA
LOC110698653	XM_021876133.1	18.456	9.456	12.696	7.28	0.867922	0.00154996	3.7672e-05	0.485652	0.405859	0.0779817	1.55351	3.64653e-16	8.21658e-18	NA	K03239//translation initiation factor eIF-2B subunit alpha+ko03013//RNA transport	XP_021731825.1|4.3e-116|protein LURP-one-related 12-like [Chenopodium quinoa]	NA
LOC110698656	XM_021876137.1	0.496	0.08	0.393	0.043	1.69919	0.151827	0.0169417	0.239058	0.921419	0.696264	2.43623	0.0350972	0.00882321	NA	K13993//HSP20 family protein+ko04141//Protein processing in endoplasmic reticulum	XP_021731829.1|3.3e-136|26.5 kDa heat shock protein, mitochondrial-like [Chenopodium quinoa]	NA
LOC110698660	XM_021876152.1,XM_021876151.1	78.333	36.15	45.723	28.17	0.718991	0.273865	0.0453944	0.456337	0.553213	0.14053	1.66591	5.06426e-07	3.4398e-08	NA	K01115//phospholipase D1/2 [EC:3.1.4.4]+ko04144//Endocytosis+ko01100//Metabolic pathways+ko01110//Biosynthesis of secondary metabolites+ko00564//Glycerophospholipid metabolism+ko00565//Ether lipid metabolism;K01115//phospholipase D1/2 [EC:3.1.4.4]+ko04144//Endocytosis+ko01100//Metabolic pathways+ko01110//Biosynthesis of secondary metabolites+ko00564//Glycerophospholipid metabolism+ko00565//Ether …	XP_021731843.1|0.0e+00|phospholipase D alpha 1-like [Chenopodium quinoa]	GO:0016042//lipid catabolic process;GO:0008152//metabolic process;GO:1901564//organonitrogen compound metabolic process;GO:0044255//cellular lipid metabolic process;GO:0006629//lipid metabolic process;GO:0009056//catabolic process;GO:0006644//phospholipid metabolic process;GO:1901575//organic substance catabolic process;GO:0009987//cellular process;GO:0046486//glycerolipid metabolic process;GO:00…
LOC110698661	XM_021876153.1	1.63	0.72	0.85	0.39	0.941276	0.426322	0.101974	0.750701	0.704399	0.240982	2.08358	0.00144938	0.000217889	AP2-EREBP	K13434//pathogenesis-related genes transcriptional activator PTI6+ko04626//Plant-pathogen interaction;K09286//EREBP-like factor	XP_021731845.1|1.3e-97|ethylene-responsive transcription factor WIN1-like [Chenopodium quinoa]	GO:0043231//intracellular membrane-bounded organelle;GO:0110165//cellular anatomical entity;GO:0043227//membrane-bounded organelle;GO:0005634//nucleus;GO:0043229//intracellular organelle;GO:0005622//intracellular;GO:0043226//organelle;GO:1901363//heterocyclic compound binding;GO:0005488//binding;GO:0003677//DNA binding;GO:0003676//nucleic acid binding;GO:0003700//DNA-binding transcription factor …
LOC110698688	XM_021876191.1	2.163	0.023	0.206	0	1.27894	0.317384	0.058959	0.117662	0.919583	0.678679	5.2612	1.86793e-08	1.0018e-09	NA	K07889//Ras-related protein Rab-5C+ko04144//Endocytosis+ko04145//Phagosome;K10395//kinesin family member 4/21/27;K20254//perilipin-4	XP_021731883.1|3.0e-99|late embryogenesis abundant protein Dc3-like [Chenopodium quinoa]	NA
LOC110698713	XM_021876222.1	72.79	36	37.503	39.793	0.00974918	0.999966	0.976225	-0.0313608	0.979258	0.889929	1.03471	0.029531	0.00717989	NA	K03301//ATP:ADP antiporter, AAA family	XP_021731914.1|0.0e+00|plastidic ATP/ADP-transporter-like [Chenopodium quinoa]	GO:0031975//envelope;GO:0042170//plastid membrane;GO:0009941//chloroplast envelope;GO:0005737//cytoplasm;GO:0031969//chloroplast membrane;GO:0043226//organelle;GO:0016021//integral component of membrane;GO:0009526//plastid envelope;GO:0031967//organelle envelope;GO:0005622//intracellular;GO:0009507//chloroplast;GO:0031090//organelle membrane;GO:0031224//intrinsic component of membrane;GO:0016020/…
LOC110698729	XM_021876235.1	105.616	31.02	21.163	16.576	0.399612	0.551229	0.169209	0.977136	0.0405549	0.00271373	2.88053	1.18303e-58	2.71954e-61	NA	K14484//auxin-responsive protein IAA+ko04075//Plant hormone signal transduction	XP_021731927.1|1.2e-114|auxin-responsive protein IAA1-like [Chenopodium quinoa]	GO:0007154//cell communication;GO:0006355//regulation of transcription, DNA-templated;GO:2001141//regulation of RNA biosynthetic process;GO:0010556//regulation of macromolecule biosynthetic process;GO:0051716//cellular response to stimulus;GO:0009987//cellular process;GO:0051252//regulation of RNA metabolic process;GO:0010033//response to organic substance;GO:0050896//response to stimulus;GO:0009…
LOC110698733	XM_021876243.1	1.586	0.47	0.62	0.173	1.05469	0.502932	0.138771	1.13749	0.419551	0.0821248	3.01377	3.7675e-05	3.71512e-06	NA	K04730//interleukin-1 receptor-associated kinase 1 [EC:2.7.11.1]	XP_021731935.1|0.0e+00|putative receptor-like protein kinase At3g47110 [Chenopodium quinoa]	NA
LOC110698737	XM_021876251.1	0.65	0.053	0.476	0.053	1.8115	0.111189	0.0103809	0.0372622	0.998482	0.959238	2.99254	0.00101535	0.000144779	AP2-EREBP	K12900//FUS-interacting serine-arginine-rich protein 1+ko03040//Spliceosome;K09286//EREBP-like factor	XP_021731943.1|1.2e-179|ethylene-responsive transcription factor ERF114-like [Chenopodium quinoa]	GO:0005634//nucleus;GO:0110165//cellular anatomical entity;GO:0043226//organelle;GO:0043231//intracellular membrane-bounded organelle;GO:0043227//membrane-bounded organelle;GO:0043229//intracellular organelle;GO:0005622//intracellular;GO:0097159//organic cyclic compound binding;GO:0005488//binding;GO:1901363//heterocyclic compound binding;GO:0140110//transcription regulator activity;GO:0003677//D…
LOC110698765	XM_021876288.1	2.963	0.72	2.043	0.896	1.05585	0.341599	0.0671209	-0.149581	0.953658	0.796075	1.79945	0.00445198	0.00078649	NA	K22312//hydroxyjasmonate sulfotransferase [EC:2.8.2.39]	XP_021731980.1|9.9e-188|cytosolic sulfotransferase 15-like [Chenopodium quinoa]	NA
LOC110698794	XM_021876318.1	1.41	0.046	0.463	0.036	1.81662	0.116238	0.0111488	0.0835613	0.973747	0.873183	4.2278	1.57977e-06	1.15971e-07	NA	K17500//integrin-linked kinase-associated serine/threonine phosphatase 2C [EC:3.1.3.16]	XP_021732010.1|1.9e-205|WAT1-related protein At2g39510-like [Chenopodium quinoa]	GO:0110165//cellular anatomical entity;GO:0016021//integral component of membrane;GO:0016020//membrane;GO:0031224//intrinsic component of membrane;GO:0022857//transmembrane transporter activity;GO:0005215//transporter activity;
LOC110698797	XM_021876317.1	5.16	4.37	5.073	1.823	1.3752	0.0504733	0.00325494	1.22248	0.0751707	0.0061834	1.60121	0.0119085	0.0024585	NA	K14709//solute carrier family 39 (zinc transporter), member 1/2/3	XP_021732009.1|1.0e-204|zinc transporter 1-like [Chenopodium quinoa]	GO:0031224//intrinsic component of membrane;GO:0016021//integral component of membrane;GO:0110165//cellular anatomical entity;GO:0016020//membrane;GO:0022857//transmembrane transporter activity;GO:0072509//divalent inorganic cation transmembrane transporter activity;GO:0046915//transition metal ion transmembrane transporter activity;GO:0015318//inorganic molecular entity transmembrane transporter…
LOC110698807	XM_021876325.1	16.813	12.023	14.316	9.373	0.677095	0.247501	0.0380139	0.462594	0.399638	0.0760511	1.05545	4.97856e-06	4.06179e-07	NA	K18660//malonyl-CoA/methylmalonyl-CoA synthetase [EC:6.2.1.-]+ko00280//Valine, leucine and isoleucine degradation	XP_021732017.1|0.0e+00|malonate--CoA ligase-like [Chenopodium quinoa]	NA
LOC110698882	XM_021876392.1	1.206	0.373	0.266	0.25	0.0730058	0.984752	0.918641	0.429703	0.919583	0.548355	2.07218	0.0243155	0.00569881	bHLH	K14963//COMPASS component SWD3;K13422//transcription factor MYC2+ko04016//MAPK signaling pathway - plant+ko04075//Plant hormone signal transduction	XP_021732084.1|5.5e-150|transcription factor bHLH25-like [Chenopodium quinoa]	NA
LOC110698899	XM_021876404.1	16.296	7.17	9.966	7.896	0.333261	0.826972	0.452202	-0.0253525	0.994964	0.940643	1.19587	0.0237567	0.00554362	NA	K14484//auxin-responsive protein IAA+ko04075//Plant hormone signal transduction	XP_021732096.1|5.4e-104|auxin-induced protein IAA6-like [Chenopodium quinoa]	GO:0019219//regulation of nucleobase-containing compound metabolic process;GO:0051716//cellular response to stimulus;GO:0051252//regulation of RNA metabolic process;GO:0010468//regulation of gene expression;GO:0010556//regulation of macromolecule biosynthetic process;GO:0071365//cellular response to auxin stimulus;GO:0009987//cellular process;GO:0009755//hormone-mediated signaling pathway;GO:0070…
LOC110698923	BGI_novel_T000978,XM_021876429.1	1.846	1.726	1.57	1.016	0.676755	0.365079	0.0760441	0.803156	0.258663	0.0370574	1.05236	0.0314788	0.00774425	NA	NA	XP_021732121.1|2.5e-66|uncharacterized protein LOC110698923 [Chenopodium quinoa]	GO:0009987//cellular process;GO:0016043//cellular component organization;GO:0006997//nucleus organization;GO:0071840//cellular component organization or biogenesis;GO:0006996//organelle organization;GO:0043231//intracellular membrane-bounded organelle;GO:0110165//cellular anatomical entity;GO:0043226//organelle;GO:0043227//membrane-bounded organelle;GO:0005622//intracellular;GO:0005634//nucleus;G…
LOC110698945	XM_021876449.1	2.26	0.19	0.263	0.183	0.425637	0.874793	0.52863	0.0990902	0.979214	0.889535	3.49031	4.61877e-08	2.6484e-09	NA	K10268//F-box and leucine-rich repeat protein 2/20;K03360//F-box and leucine-rich repeat protein GRR1+ko04120//Ubiquitin mediated proteolysis	XP_021732141.1|0.0e+00|F-box/LRR-repeat protein 2-like [Chenopodium quinoa]	NA
LOC110699044	XM_021876534.1	8.783	4.41	5.33	5.023	0.171277	0.898091	0.661793	-0.0655379	0.958821	0.815271	1.01099	0.00697654	0.0013166	NA	K16251//DNA-directed RNA polymerase V subunit 1 [EC:2.7.7.6]	XP_021732226.1|2.7e-283|uncharacterized protein LOC110699044 [Chenopodium quinoa]	NA
LOC110699050	XM_021876541.1	19.443	11.276	13.123	8.766	0.645856	0.0454818	0.00279139	0.467367	0.261369	0.0376126	1.36121	1.93072e-10	7.90108e-12	NA	K14500//BR-signaling kinase [EC:2.7.11.1]+ko04075//Plant hormone signal transduction	XP_021732233.1|2.1e-288|probable serine/threonine-protein kinase At4g35230 [Chenopodium quinoa]	GO:0097159//organic cyclic compound binding;GO:0016773//phosphotransferase activity, alcohol group as acceptor;GO:0004672//protein kinase activity;GO:0016301//kinase activity;GO:0043168//anion binding;GO:0032555//purine ribonucleotide binding;GO:0030554//adenyl nucleotide binding;GO:0036094//small molecule binding;GO:0043167//ion binding;GO:0017076//purine nucleotide binding;GO:1901363//heterocyc…
LOC110699054	XM_021876546.1,XM_021876548.1,XM_021876547.1	8.69	4.166	5.503	4.81	0.277886	0.373294	0.0790524	-0.0835578	0.919583	0.659979	1.07948	1.10568e-09	4.96839e-11	NA	K18626//trichohyalin;K18626//trichohyalin;K18626//trichohyalin	XP_021732238.1|0.0e+00|uncharacterized protein LOC110699054 [Chenopodium quinoa]	NA
LOC110699070	XM_021876564.1	3.25	0.39	1.166	0.503	0.933671	0.532898	0.156877	-0.160334	0.960426	0.819961	2.52677	0.00157347	0.000239035	NA	K00384//thioredoxin reductase (NADPH) [EC:1.8.1.9]+ko00450//Selenocompound metabolism	XP_021732256.1|1.5e-121|putative germin-like protein 2-1 [Chenopodium quinoa]	NA
LOC110699084	XM_021876579.1	4.443	1.41	1.65	0.78	0.91815	0.455974	0.116491	0.774352	0.635882	0.188383	2.54617	6.1345e-06	5.08992e-07	NA	NA	XP_021732271.1|1.5e-127|uncharacterized protein LOC110699084 [Chenopodium quinoa]	NA
LOC110699102	XM_021876589.1	22.78	16.603	13.183	12.88	0.095822	0.92341	0.74503	0.461969	0.431884	0.0863501	1.03336	0.000140869	1.59226e-05	NA	K14209//solute carrier family 36 (proton-coupled amino acid transporter)	XP_023515413.1|8.7e-234|amino acid permease 3-like [Cucurbita pepo subsp. pepo]	GO:0016020//membrane;GO:0016021//integral component of membrane;GO:0110165//cellular anatomical entity;GO:0031224//intrinsic component of membrane;
LOC110699161	XM_021876647.1	8.73	5.133	5.2	3.256	0.676066	0.410453	0.0946193	0.712494	0.354322	0.0618855	1.58833	0.000140527	1.58779e-05	NA	K04733//interleukin-1 receptor-associated kinase 4 [EC:2.7.11.1]	XP_021732339.1|1.6e-259|protein LYK5-like [Chenopodium quinoa]	GO:0043168//anion binding;GO:0097159//organic cyclic compound binding;GO:0005524//ATP binding;GO:1901363//heterocyclic compound binding;GO:0140096//catalytic activity, acting on a protein;GO:0016772//transferase activity, transferring phosphorus-containing groups;GO:0016773//phosphotransferase activity, alcohol group as acceptor;GO:0017076//purine nucleotide binding;GO:0004672//protein kinase act…
LOC110699188	XM_021876679.1	3.273	0.296	0.823	0.286	1.28234	0.198341	0.0261148	0.129581	0.964245	0.843273	3.39851	4.20798e-08	2.39369e-09	NA	NA	XP_021732371.1|2.5e-81|uncharacterized protein LOC110699188 [Chenopodium quinoa]	NA
LOC110699211	XM_021876704.1	8.103	6.47	6.316	4.18	0.649793	0.0871789	0.00720616	0.731973	0.00982188	0.000455926	1.16887	1.81985e-06	1.35371e-07	MYB	K09422//transcription factor MYB, plant	XP_021732396.1|2.8e-252|transcription factor MYB1-like [Chenopodium quinoa]	GO:0110165//cellular anatomical entity;GO:0043231//intracellular membrane-bounded organelle;GO:0043226//organelle;GO:0043227//membrane-bounded organelle;GO:0005622//intracellular;GO:0043229//intracellular organelle;GO:0005634//nucleus;GO:0003677//DNA binding;GO:0003676//nucleic acid binding;GO:0005488//binding;GO:0097159//organic cyclic compound binding;GO:1901363//heterocyclic compound binding;
LOC110699214	XM_021876706.1,BGI_novel_T009702	127.37	54.373	65.756	49.683	0.373321	0.696739	0.284725	0.238536	0.878086	0.463663	1.35579	1.44067e-05	1.29661e-06	NA	K14209//solute carrier family 36 (proton-coupled amino acid transporter);K14209//solute carrier family 36 (proton-coupled amino acid transporter);K15015//solute carrier family 32 (vesicular inhibitory amino acid transporter)	XP_021732398.1|6.8e-302|proline transporter 1-like [Chenopodium quinoa]	GO:0016020//membrane;GO:0016021//integral component of membrane;GO:0110165//cellular anatomical entity;GO:0031224//intrinsic component of membrane;
LOC110699216	XM_021876707.1	20.92	10.89	12.88	10.326	0.374927	0.537069	0.160026	0.187659	0.864555	0.436473	1.2244	1.84768e-06	1.37842e-07	NA	K15286//solute carrier family 35, member E4;K15285//solute carrier family 35, member E3	XP_021866984.1|1.9e-164|probable sugar phosphate/phosphate translocator At3g11320 [Spinacia oleracea]	GO:0008643//carbohydrate transport;GO:0006810//transport;GO:0051234//establishment of localization;GO:0051179//localization;GO:0071702//organic substance transport;GO:0005737//cytoplasm;GO:0043229//intracellular organelle;GO:0043231//intracellular membrane-bounded organelle;GO:0016020//membrane;GO:0043226//organelle;GO:0043227//membrane-bounded organelle;GO:0005794//Golgi apparatus;GO:0110165//ce…
LOC110699220	XM_021876711.1	0.706	0.053	0.1	0.13	-0.110365	0.968213	0.8767	-0.465042	0.904872	0.513443	2.12882	0.0291363	0.00705928	NA	K08770//ubiquitin C	XP_021765178.1|1.2e-54|ubiquitin-like [Chenopodium quinoa]	GO:0019538//protein metabolic process;GO:0043604//amide biosynthetic process;GO:0034641//cellular nitrogen compound metabolic process;GO:0043043//peptide biosynthetic process;GO:0009059//macromolecule biosynthetic process;GO:0043170//macromolecule metabolic process;GO:1901566//organonitrogen compound biosynthetic process;GO:0044271//cellular nitrogen compound biosynthetic process;GO:0009058//bios…
LOC110699237	XM_021876728.1	105.12	71.45	70.586	53.496	0.465824	0.621971	0.218228	0.500303	0.543433	0.135558	1.1501	0.014707	0.00315184	NA	K19747//BAHD acyltransferase [EC:2.3.1.-];K22889//trichothecene 3-O-acetyltransferase [EC:2.3.1.-]	XP_021732420.1|8.6e-285|uncharacterized acetyltransferase At3g50280-like [Chenopodium quinoa]	GO:0016740//transferase activity;GO:0016747//transferase activity, transferring acyl groups other than amino-acyl groups;GO:0016746//transferase activity, transferring acyl groups;GO:0003824//catalytic activity;
LOC110699249	XM_021876740.1	1221.75	586.786	723.57	684.22	0.170607	0.798081	0.410604	-0.0925465	0.930531	0.721198	1.05505	6.79755e-08	3.99786e-09	NA	K09872//aquaporin PIP	XP_021732432.1|7.5e-165|probable aquaporin PIP1-4 [Chenopodium quinoa]	GO:0110165//cellular anatomical entity;GO:0016020//membrane;GO:0016021//integral component of membrane;GO:0031224//intrinsic component of membrane;GO:0015267//channel activity;GO:0022857//transmembrane transporter activity;GO:0005215//transporter activity;GO:0022803//passive transmembrane transporter activity;
LOC110699252	XM_021876743.1	104.58	60.603	34.543	37.69	-0.0124087	0.999966	0.969919	0.775769	0.102951	0.00950597	1.67463	4.5668e-07	3.07715e-08	NA	NA	XP_021732435.1|6.4e-281|nematode resistance protein-like HSPRO2 [Chenopodium quinoa]	GO:0044237//cellular metabolic process;GO:0009310//amine catabolic process;GO:1901564//organonitrogen compound metabolic process;GO:0019752//carboxylic acid metabolic process;GO:0006950//response to stress;GO:0006082//organic acid metabolic process;GO:0009074//aromatic amino acid family catabolic process;GO:1901575//organic substance catabolic process;GO:0046700//heterocycle catabolic process;GO:…
LOC110699262	XM_021876756.1,XM_021876755.1	15.01	11.006	11.15	7.71	0.606264	0.185533	0.0235542	0.61773	0.126344	0.0127869	1.17724	1.75905e-05	1.61138e-06	NA	K00685//arginyl-tRNA---protein transferase [EC:2.3.2.8];K00685//arginyl-tRNA---protein transferase [EC:2.3.2.8]	XP_021732447.1|0.0e+00|arginyl-tRNA--protein transferase 1-like [Chenopodium quinoa]	GO:0140096//catalytic activity, acting on a protein;GO:0016755//transferase activity, transferring amino-acyl groups;GO:0016740//transferase activity;GO:0003824//catalytic activity;GO:0016746//transferase activity, transferring acyl groups;
LOC110699314	XM_021876825.1	1.326	1.463	0.69	0.586	0.278727	0.898091	0.599518	1.23306	0.156338	0.0174356	1.31786	0.0410167	0.0106396	NA	K08332//vacuolar protein 8	XP_021732517.1|0.0e+00|U-box domain-containing protein 1-like [Chenopodium quinoa]	GO:0003824//catalytic activity;GO:0140096//catalytic activity, acting on a protein;GO:0004842//ubiquitin-protein transferase activity;GO:0019787//ubiquitin-like protein transferase activity;GO:0016740//transferase activity;
LOC110699320	XM_021876829.1,BGI_novel_T009723	14.773	5.693	7.816	6.173	0.386572	0.652345	0.24305	0.00187998	0.998538	0.994425	1.46858	3.64206e-09	1.76057e-10	NA	K04733//interleukin-1 receptor-associated kinase 4 [EC:2.7.11.1];K04733//interleukin-1 receptor-associated kinase 4 [EC:2.7.11.1]	XP_021732521.1|0.0e+00|probable inactive receptor-like protein kinase At3g56050 [Chenopodium quinoa]	GO:0110165//cellular anatomical entity;GO:0016021//integral component of membrane;GO:0016020//membrane;GO:0031224//intrinsic component of membrane;GO:0140096//catalytic activity, acting on a protein;GO:0005488//binding;GO:0097159//organic cyclic compound binding;GO:0016301//kinase activity;GO:0097367//carbohydrate derivative binding;GO:0032553//ribonucleotide binding;GO:0003824//catalytic activit…
LOC110699356	BGI_novel_T009729,XM_021876879.1,XM_021876878.1	13.823	10.133	12.926	7.696	0.809059	0.0105824	0.000408763	0.498102	0.274758	0.0405255	1.05049	9.90045e-05	1.07548e-05	NA	NA	XP_021732571.1|2.6e-131|staphylococcal-like nuclease CAN2 isoform X2 [Chenopodium quinoa]	GO:0003824//catalytic activity;GO:0043169//cation binding;GO:0097159//organic cyclic compound binding;GO:1901363//heterocyclic compound binding;GO:0043167//ion binding;GO:0003676//nucleic acid binding;GO:0046872//metal ion binding;GO:0016787//hydrolase activity;GO:0005488//binding;GO:0016788//hydrolase activity, acting on ester bonds;GO:0004518//nuclease activity;
LOC110699434	XM_021876946.1	1.33	0.34	0.736	0.346	0.889661	0.496919	0.135646	0.0490944	0.994916	0.940401	1.96074	0.00372146	0.000637986	NA	K01599//uroporphyrinogen decarboxylase [EC:4.1.1.37]+ko00860//Porphyrin and chlorophyll metabolism+ko01100//Metabolic pathways+ko01110//Biosynthesis of secondary metabolites	XP_021732638.1|1.7e-205|peptide-N4-(N-acetyl-beta-glucosaminyl)asparagine amidase A-like [Chenopodium quinoa]	GO:0043227//membrane-bounded organelle;GO:0005622//intracellular;GO:0005737//cytoplasm;GO:0043226//organelle;GO:0005773//vacuole;GO:0043231//intracellular membrane-bounded organelle;GO:0043229//intracellular organelle;GO:0110165//cellular anatomical entity;
LOC110699453	XM_021876958.1	1.51	0.026	0.056	0.053	-0.000705767	0.999966	0.999017	-0.157911	0.948003	0.776639	3.56534	0.000223618	2.67016e-05	NA	NA	XP_021732650.1|8.2e-98|oleosin 18.2 kDa-like [Chenopodium quinoa]	GO:0043228//non-membrane-bounded organelle;GO:0110165//cellular anatomical entity;GO:0005811//lipid droplet;GO:0012511//monolayer-surrounded lipid storage body;GO:0016020//membrane;GO:0043229//intracellular organelle;GO:0005622//intracellular;GO:0016021//integral component of membrane;GO:0031224//intrinsic component of membrane;GO:0043226//organelle;GO:0043232//intracellular non-membrane-bounded …
LOC110699570	XM_021877067.1	14.93	6.326	8.186	6.036	0.51425	0.365647	0.076238	0.185785	0.903342	0.503524	1.51566	9.31231e-09	4.77218e-10	NA	K12197//charged multivesicular body protein 1+ko04144//Endocytosis	XP_021732759.1|1.0e-106|ESCRT-related protein CHMP1B-like [Chenopodium quinoa]	GO:0007034//vacuolar transport;GO:0051179//localization;GO:0051234//establishment of localization;GO:0006810//transport;GO:0009987//cellular process;
LOC110699588	XM_021877091.1	10.78	2.61	2.446	1.376	0.851913	0.0930743	0.00792154	0.968803	0.109008	0.0103422	3.11421	7.51958e-25	8.67563e-27	C2C2-Dof	K20043//clathrin coat assembly protein AP180;K09326//homeobox protein OTX1;K04733//interleukin-1 receptor-associated kinase 4 [EC:2.7.11.1];K16222//Dof zinc finger protein DOF5.5+ko04712//Circadian rhythm - plant	XP_021732783.1|1.1e-126|dof zinc finger protein DOF3.1-like [Chenopodium quinoa]	GO:0006355//regulation of transcription, DNA-templated;GO:0010556//regulation of macromolecule biosynthetic process;GO:0051171//regulation of nitrogen compound metabolic process;GO:0080090//regulation of primary metabolic process;GO:0019219//regulation of nucleobase-containing compound metabolic process;GO:0050789//regulation of biological process;GO:0031323//regulation of cellular metabolic proc…
LOC110699592	XM_021877094.1	307.36	112.936	185.316	77.716	1.19048	0.0523714	0.00344652	0.611625	0.544246	0.135939	2.13671	2.24088e-07	1.43849e-08	NA	K13248//pyridoxal phosphate phosphatase PHOSPHO2 [EC:3.1.3.74]+ko00750//Vitamin B6 metabolism+ko01100//Metabolic pathways	XP_021732786.1|1.7e-169|inorganic pyrophosphatase 1-like [Chenopodium quinoa]	GO:0046872//metal ion binding;GO:0003824//catalytic activity;GO:0016791//phosphatase activity;GO:0042578//phosphoric ester hydrolase activity;GO:0043167//ion binding;GO:0016788//hydrolase activity, acting on ester bonds;GO:0043169//cation binding;GO:0016787//hydrolase activity;GO:0005488//binding;
LOC110699606	XM_021877112.1	139.14	115.716	80.756	73.613	0.194752	0.837205	0.466589	0.752173	0.00707823	0.000310891	1.12761	8.70499e-06	7.48149e-07	NA	K05359//arogenate/prephenate dehydratase [EC:4.2.1.91 4.2.1.51]+ko01230//Biosynthesis of amino acids+ko01100//Metabolic pathways+ko01110//Biosynthesis of secondary metabolites+ko00400//Phenylalanine, tyrosine and tryptophan biosynthesis	XP_021732804.1|2.2e-252|arogenate dehydratase/prephenate dehydratase 6, chloroplastic-like [Chenopodium quinoa]	GO:0006082//organic acid metabolic process;GO:0044281//small molecule metabolic process;GO:0044249//cellular biosynthetic process;GO:1901564//organonitrogen compound metabolic process;GO:0044237//cellular metabolic process;GO:1901362//organic cyclic compound biosynthetic process;GO:1902223//erythrose 4-phosphate/phosphoenolpyruvate family amino acid biosynthetic process;GO:0008152//metabolic proc…
LOC110699625	XM_021877134.1,BGI_novel_T009776	3.98	2.773	2.423	1.386	0.776732	0.268975	0.0440562	1.04055	0.115613	0.0112475	1.68537	5.01309e-05	5.10213e-06	NA	K14209//solute carrier family 36 (proton-coupled amino acid transporter);K15015//solute carrier family 32 (vesicular inhibitory amino acid transporter);K14209//solute carrier family 36 (proton-coupled amino acid transporter);K15015//solute carrier family 32 (vesicular inhibitory amino acid transporter)	XP_021732826.1|1.9e-259|GABA transporter 1-like [Chenopodium quinoa]	GO:0110165//cellular anatomical entity;GO:0016020//membrane;GO:0031224//intrinsic component of membrane;GO:0016021//integral component of membrane;
LOC110699626	XM_021877135.1	29.413	5.466	4.543	3.723	0.363	0.513054	0.145254	0.646916	0.220506	0.0290262	3.17213	2.06774e-44	8.38558e-47	NA	K14209//solute carrier family 36 (proton-coupled amino acid transporter);K15015//solute carrier family 32 (vesicular inhibitory amino acid transporter)	XP_021732827.1|2.1e-279|GABA transporter 1-like [Chenopodium quinoa]	GO:0031224//intrinsic component of membrane;GO:0110165//cellular anatomical entity;GO:0016021//integral component of membrane;GO:0016020//membrane;
LOC110699650	XM_021877161.1	4.38	1.186	1.186	0.61	0.908955	0.339346	0.066235	0.933079	0.361707	0.0638567	2.93492	1.33679e-10	5.36327e-12	NA	K12761//carbon catabolite-derepressing protein kinase [EC:2.7.11.1]	XP_021732853.1|2.1e-285|CBL-interacting serine/threonine-protein kinase 11-like [Chenopodium quinoa]	GO:0065007//biological regulation;GO:0051716//cellular response to stimulus;GO:0050896//response to stimulus;GO:0023052//signaling;GO:0050789//regulation of biological process;GO:0009987//cellular process;GO:0050794//regulation of cellular process;GO:0007165//signal transduction;GO:0007154//cell communication;GO:0032555//purine ribonucleotide binding;GO:0017076//purine nucleotide binding;GO:01400…
LOC110699790	XM_021877306.1	1.44	0.933	0.656	0.343	0.538052	0.823019	0.446179	0.992492	0.571857	0.149949	1.90478	0.037917	0.00968668	NA	K19984//exocyst complex component 5	XP_021732998.1|1.3e-124|zinc finger BED domain-containing protein DAYSLEEPER-like [Chenopodium quinoa]	NA
LOC110699814	XM_021877328.1	0.493	0.14	0.166	0.116	0.417305	0.862587	0.505443	0.309683	0.919583	0.613907	2.13505	0.000558568	7.36746e-05	NA	K15078//structure-specific endonuclease subunit SLX1 [EC:3.6.1.-]	XP_021733020.1|0.0e+00|putative disease resistance protein RGA4 [Chenopodium quinoa]	NA
LOC110699866	XM_021877383.1,XM_021877377.1	5.41	5.373	4.986	2.766	0.872843	0.138926	0.0147148	1.0073	0.0621151	0.00477337	1.16352	0.00462971	0.000823109	NA	K04733//interleukin-1 receptor-associated kinase 4 [EC:2.7.11.1];K04733//interleukin-1 receptor-associated kinase 4 [EC:2.7.11.1]	XP_021733075.1|2.2e-223|cold-responsive protein kinase 1-like isoform X2 [Chenopodium quinoa]	NA
LOC110699906	XM_021877400.1	4.526	2.7	3.183	1.38	1.11148	0.284998	0.0486919	0.937686	0.462957	0.0981611	1.82751	0.00771634	0.00148366	NA	NA	XP_021733092.1|9.2e-67|major latex protein 146-like [Chenopodium quinoa]	NA
LOC110699907	XM_021877401.1	0.733	0.273	0.433	0.09	1.41239	0.2594	0.0415107	0.922713	0.656769	0.203337	2.37705	0.0257986	0.00612082	NA	NA	XP_021733093.1|4.7e-55|MLP-like protein 43 [Chenopodium quinoa]	GO:0006950//response to stress;GO:0006952//defense response;GO:0050896//response to stimulus;
LOC110699935	XM_021877427.1	72.236	53.16	44.046	35.26	0.391568	0.102635	0.00917508	0.701581	3.06632e-05	5.56853e-07	1.25389	3.98352e-19	6.96302e-21	NA	K18171//COX assembly mitochondrial protein 1	XP_021733119.1|0.0e+00|uncharacterized protein LOC110699935 [Chenopodium quinoa]	NA
LOC110699956	XM_021877448.1	29.85	9.86	11.653	9.593	0.359556	0.419569	0.0990719	0.157402	0.872226	0.452345	1.84248	2.53736e-15	6.23459e-17	NA	K20891//beta-glucuronosyltransferase [EC:2.4.1.-]	XP_021733140.1|7.2e-239|beta-glucuronosyltransferase GlcAT14A-like [Chenopodium quinoa]	GO:0110165//cellular anatomical entity;GO:0016020//membrane;
LOC110700012	XM_021877495.1	1.923	0.74	1.4	0.58	1.21114	0.0659246	0.00478681	0.432612	0.792091	0.323952	1.86095	0.000124441	1.38849e-05	MYB	K09422//transcription factor MYB, plant	XP_021733187.1|8.6e-233|transcription factor MYB56-like [Chenopodium quinoa]	GO:0110165//cellular anatomical entity;GO:0043226//organelle;GO:0043231//intracellular membrane-bounded organelle;GO:0005634//nucleus;GO:0005622//intracellular;GO:0043229//intracellular organelle;GO:0043227//membrane-bounded organelle;GO:0003677//DNA binding;GO:0003676//nucleic acid binding;GO:1901363//heterocyclic compound binding;GO:0097159//organic cyclic compound binding;GO:0005488//binding;
LOC110700029	XM_021877522.1	1.666	0.23	0.166	0	1.44168	0.243594	0.0370429	1.751	0.143463	0.0152265	5.46305	1.83415e-09	8.48193e-11	MYB	K09422//transcription factor MYB, plant	XP_021733214.1|2.9e-131|myb-related protein 305-like [Chenopodium quinoa]	GO:0003676//nucleic acid binding;GO:0005488//binding;GO:1901363//heterocyclic compound binding;GO:0003677//DNA binding;GO:0097159//organic cyclic compound binding;
LOC110700084	XM_021877584.1	0.143	0.01	0.056	0	1.03317	0.448442	0.112675	0.117662	0.919583	0.678679	2.58655	0.0361773	0.0091575	NA	K01426//amidase [EC:3.5.1.4]+ko00380//Tryptophan metabolism+ko00330//Arginine and proline metabolism+ko00360//Phenylalanine metabolism;K06630//14-3-3 protein epsilon;K03006//DNA-directed RNA polymerase II subunit RPB1 [EC:2.7.7.6]+ko03020//RNA polymerase;K16040//trans-resveratrol di-O-methyltransferase [EC:2.1.1.240]+ko00945//Stilbenoid, diarylheptanoid and gingerol biosynthesis;K01051//pectinest…	XP_021733276.1|0.0e+00|uncharacterized protein LOC110700084 [Chenopodium quinoa]	NA
LOC110700257	XM_021877767.1,BGI_novel_T009907,BGI_novel_T009906,XM_021877768.1,XM_021877770.1,XM_021877769.1	20.96	8.88	12.23	8.356	0.59302	0.240602	0.0362148	0.209485	0.813162	0.35378	1.5633	4.29556e-14	1.18868e-15	NA	K04733//interleukin-1 receptor-associated kinase 4 [EC:2.7.11.1];K04733//interleukin-1 receptor-associated kinase 4 [EC:2.7.11.1];K04733//interleukin-1 receptor-associated kinase 4 [EC:2.7.11.1];K04733//interleukin-1 receptor-associated kinase 4 [EC:2.7.11.1];K04733//interleukin-1 receptor-associated kinase 4 [EC:2.7.11.1];K04733//interleukin-1 receptor-associated kinase 4 [EC:2.7.11.1]	XP_021733459.1|0.0e+00|probably inactive leucine-rich repeat receptor-like protein kinase At5g48380 [Chenopodium quinoa]	GO:0031224//intrinsic component of membrane;GO:0016020//membrane;GO:0016021//integral component of membrane;GO:0110165//cellular anatomical entity;GO:0043167//ion binding;GO:0016772//transferase activity, transferring phosphorus-containing groups;GO:0032559//adenyl ribonucleotide binding;GO:0032555//purine ribonucleotide binding;GO:0016740//transferase activity;GO:0030554//adenyl nucleotide bindi…
LOC110700330	XM_021877855.1	13.563	8.35	8.01	5.853	0.524194	0.418212	0.0982612	0.604896	0.318189	0.0516014	1.41627	1.84736e-05	1.70149e-06	NA	K04422//mitogen-activated protein kinase kinase kinase 13 [EC:2.7.11.25]	XP_021733547.1|7.5e-116|uncharacterized protein LOC110700330 [Chenopodium quinoa]	NA
LOC110700358	XM_021877884.1	5.683	1.913	3.043	1.826	0.768578	0.204003	0.0274509	0.168299	0.919583	0.624145	1.80955	9.31488e-08	5.60174e-09	NA	K04733//interleukin-1 receptor-associated kinase 4 [EC:2.7.11.1]	XP_021733576.1|0.0e+00|G-type lectin S-receptor-like serine/threonine-protein kinase At4g03230 [Chenopodium quinoa]	NA
LOC110700414	XM_021877954.1,XM_021877955.1	34.38	16.633	26.043	18.033	0.590702	0.419395	0.0989427	0.00250215	0.998482	0.993979	1.13796	0.0105135	0.00212546	NA	K16055//trehalose 6-phosphate synthase/phosphatase [EC:2.4.1.15 3.1.3.12]+ko01100//Metabolic pathways+ko00500//Starch and sucrose metabolism;K16055//trehalose 6-phosphate synthase/phosphatase [EC:2.4.1.15 3.1.3.12]+ko01100//Metabolic pathways+ko00500//Starch and sucrose metabolism	XP_021850595.1|0.0e+00|probable alpha,alpha-trehalose-phosphate synthase [UDP-forming] 10 [Spinacia oleracea]	GO:0044262//cellular carbohydrate metabolic process;GO:0009311//oligosaccharide metabolic process;GO:0009058//biosynthetic process;GO:0046351//disaccharide biosynthetic process;GO:0071704//organic substance metabolic process;GO:0044249//cellular biosynthetic process;GO:0016051//carbohydrate biosynthetic process;GO:0005991//trehalose metabolic process;GO:0044238//primary metabolic process;GO:00442…
LOC110700417	XM_021877958.1	10.103	4.516	3.996	4.793	-0.148612	0.898091	0.65185	0.033732	0.993479	0.934696	1.28354	0.000136694	1.53973e-05	NA	NA	XP_021733650.1|5.2e-112|uncharacterized protein LOC110700417 [Chenopodium quinoa]	NA
LOC110700440	XM_021877980.1	13.543	10.67	8.313	7.733	0.195257	0.824989	0.448974	0.565818	0.153778	0.0169615	1.02429	4.47072e-08	2.55575e-09	NA	K04392//Ras-related C3 botulinum toxin substrate 1+ko04145//Phagosome	XP_021718988.1|6.6e-118|rac-like GTP-binding protein 3 [Chenopodium quinoa]	GO:0007154//cell communication;GO:0050789//regulation of biological process;GO:0007165//signal transduction;GO:0009987//cellular process;GO:0050794//regulation of cellular process;GO:0051716//cellular response to stimulus;GO:0007264//small GTPase mediated signal transduction;GO:0023052//signaling;GO:0035556//intracellular signal transduction;GO:0050896//response to stimulus;GO:0065007//biological…
LOC110700451	XM_021877991.1,XM_021877992.1,BGI_novel_T009967	28.603	12.86	13.103	11.683	0.291058	0.562795	0.176192	0.271215	0.796688	0.329634	1.51541	3.75723e-13	1.14564e-14	NA	K21989//calcium permeable stress-gated cation channel;K21989//calcium permeable stress-gated cation channel;K11820//N-hydroxythioamide S-beta-glucosyltransferase [EC:2.4.1.195]+ko00380//Tryptophan metabolism+ko00966//Glucosinolate biosynthesis+ko01110//Biosynthesis of secondary metabolites+ko01210//2-Oxocarboxylic acid metabolism	XP_021733684.1|6.3e-213|calmodulin-binding protein 60 A-like isoform X2 [Chenopodium quinoa]	GO:0005515//protein binding;GO:0005516//calmodulin binding;GO:0005488//binding;
LOC110700452	XM_021877993.1	2.553	1.626	1.66	0.92	0.860258	0.206477	0.0279872	0.880266	0.166088	0.0190469	1.64037	0.000228627	2.73791e-05	NA	K11820//N-hydroxythioamide S-beta-glucosyltransferase [EC:2.4.1.195]+ko00380//Tryptophan metabolism+ko00966//Glucosinolate biosynthesis+ko01110//Biosynthesis of secondary metabolites+ko01210//2-Oxocarboxylic acid metabolism	XP_021733685.1|1.4e-269|UDP-glycosyltransferase 74B1-like [Chenopodium quinoa]	GO:0016757//transferase activity, transferring glycosyl groups;GO:0016740//transferase activity;GO:0003824//catalytic activity;GO:0016758//transferase activity, transferring hexosyl groups;
LOC110700461	XM_021878003.1,BGI_novel_T009968	86.416	66.85	72.533	44.276	0.776961	0.00173231	4.30859e-05	0.683267	0.291158	0.0445835	1.1868	4.29082e-09	2.08907e-10	NA	K00130//betaine-aldehyde dehydrogenase [EC:1.2.1.8]+ko01100//Metabolic pathways+ko00260//Glycine, serine and threonine metabolism;K00130//betaine-aldehyde dehydrogenase [EC:1.2.1.8]+ko01100//Metabolic pathways+ko00260//Glycine, serine and threonine metabolism	AAB41696.1|5.6e-275|betaine aldehyde dehydrogenase [Spinacia oleracea]	GO:0044237//cellular metabolic process;GO:0006577//amino-acid betaine metabolic process;GO:1901564//organonitrogen compound metabolic process;GO:1901566//organonitrogen compound biosynthetic process;GO:0031455//glycine betaine metabolic process;GO:0097164//ammonium ion metabolic process;GO:0019695//choline metabolic process;GO:0044271//cellular nitrogen compound biosynthetic process;GO:0008152//m…
LOC110700474	XM_021878017.1	3.573	2.933	3.9	1.926	0.959311	0.223823	0.0320402	0.661023	0.374146	0.0679494	1.07563	0.00583411	0.00107228	NA	K18875//enhanced disease susceptibility 1 protein+ko04626//Plant-pathogen interaction	XP_021733709.1|0.0e+00|LOW QUALITY PROTEIN: protein EDS1L-like [Chenopodium quinoa]	GO:0008152//metabolic process;GO:0044238//primary metabolic process;GO:0006629//lipid metabolic process;GO:0071704//organic substance metabolic process;
LOC110700510	XM_021878055.1	0.836	0.453	0.586	0.25	1.01861	0.381685	0.0824689	0.730141	0.708807	0.245642	1.70715	0.0373997	0.00952612	NA	NA	XP_021733747.1|4.7e-96|uncharacterized protein LOC110700510 [Chenopodium quinoa]	NA
LOC110700527	XM_021878078.1,BGI_novel_T009979	5.33	2.733	4.223	1.723	1.24975	0.0630477	0.00448171	0.724783	0.330986	0.0551921	1.80284	4.3983e-08	2.50767e-09	NA	K14638//solute carrier family 15 (peptide/histidine transporter), member 3/4;K14638//solute carrier family 15 (peptide/histidine transporter), member 3/4	XP_021733770.1|0.0e+00|protein NRT1/ PTR FAMILY 2.11-like [Chenopodium quinoa]	GO:0016020//membrane;GO:0110165//cellular anatomical entity;GO:0016021//integral component of membrane;GO:0031224//intrinsic component of membrane;GO:0005215//transporter activity;GO:0022857//transmembrane transporter activity;
LOC110700538	XM_021878091.1,XM_021878090.1,BGI_novel_T009982	1.22	0.693	0.79	0.583	0.482121	0.627509	0.222477	0.337843	0.878998	0.464708	1.25865	0.009185	0.00181445	NA	K03188//urease accessory protein;K18626//trichohyalin;K18626//trichohyalin;K18626//trichohyalin	XP_021733782.1|4.5e-169|putative F-box protein PP2-B12 isoform X1 [Chenopodium quinoa]	NA
LOC110700544	XM_021878097.1	3.046	1.283	1.853	0.853	1.02753	0.286635	0.0492175	0.588348	0.748692	0.28207	1.89891	0.00310169	0.000517677	NA	K13993//HSP20 family protein+ko04141//Protein processing in endoplasmic reticulum	XP_021733789.1|1.6e-85|18.1 kDa class I heat shock protein-like [Chenopodium quinoa]	NA
LOC110700547	XM_021878100.1	5.956	3.243	2.483	2.3	0.203225	0.865928	0.51178	0.598053	0.344361	0.058834	1.57541	1.52124e-07	9.46839e-09	NA	K00784//ribonuclease Z [EC:3.1.26.11]+ko03013//RNA transport	XP_021733792.1|7.6e-167|tRNase Z TRZ1-like [Chenopodium quinoa]	NA
LOC110700548	XM_021878101.1	5.55	3.04	1.98	1.856	0.0986376	0.967114	0.873615	0.732776	0.518233	0.122375	1.70792	0.000375076	4.73781e-05	NA	NA	XP_021733793.1|3.9e-118|germin-like protein subfamily T member 2 [Chenopodium quinoa]	GO:0030312//external encapsulating structure;GO:0048046//apoplast;GO:0110165//cellular anatomical entity;GO:0005618//cell wall;GO:0071944//cell periphery;GO:0005576//extracellular region;GO:0045735//nutrient reservoir activity;GO:0030145//manganese ion binding;GO:0005488//binding;GO:0046914//transition metal ion binding;GO:0043167//ion binding;GO:0046872//metal ion binding;GO:0043169//cation bind…
LOC110700570	XM_021878123.1,BGI_novel_T009988,BGI_novel_T009987,XM_021878124.1	5.433	2.596	3.53	3.023	0.344419	0.667137	0.256705	-0.110941	0.919583	0.672133	1.21842	6.92423e-06	5.80385e-07	NA	NA	XP_021733816.1|2.2e-168|uncharacterized protein LOC110700570 isoform X2 [Chenopodium quinoa]	NA
LOC110700605	XM_021878164.1	56.093	37.55	42.043	30.85	0.525017	0.0196466	0.000910488	0.397954	0.301999	0.0473285	1.08605	9.46076e-07	6.66814e-08	C2C2-Dof	K16222//Dof zinc finger protein DOF5.5+ko04712//Circadian rhythm - plant	XP_021733856.1|3.3e-275|cyclic dof factor 3-like [Chenopodium quinoa]	GO:0010468//regulation of gene expression;GO:0065007//biological regulation;GO:0009889//regulation of biosynthetic process;GO:1903506//regulation of nucleic acid-templated transcription;GO:0031326//regulation of cellular biosynthetic process;GO:0031323//regulation of cellular metabolic process;GO:0080090//regulation of primary metabolic process;GO:2000112//regulation of cellular macromolecule bio…
LOC110700627	XM_021878184.1	8.39	5.223	4.16	4.553	-0.0400233	0.960621	0.856738	0.3079	0.636552	0.188971	1.09795	1.29096e-07	7.92869e-09	NA	NA	XP_021733876.1|4.7e-299|protein NEN1-like [Chenopodium quinoa]	GO:1901363//heterocyclic compound binding;GO:0005488//binding;GO:0003676//nucleic acid binding;GO:0097159//organic cyclic compound binding;
LOC110700633	XM_021878196.1,BGI_novel_T010002	19.776	7.84	10.24	6.816	0.655083	0.212462	0.0294506	0.304069	0.547222	0.137668	1.74187	3.27607e-15	8.13494e-17	NA	K12127//pseudo-response regulator 1+ko04712//Circadian rhythm - plant;K12127//pseudo-response regulator 1+ko04712//Circadian rhythm - plant	XP_021733888.1|0.0e+00|two-component response regulator-like APRR1 [Chenopodium quinoa]	GO:0051716//cellular response to stimulus;GO:0007165//signal transduction;GO:0050789//regulation of biological process;GO:0007154//cell communication;GO:0050794//regulation of cellular process;GO:0009987//cellular process;GO:0035556//intracellular signal transduction;GO:0023052//signaling;GO:0000160//phosphorelay signal transduction system;GO:0050896//response to stimulus;GO:0065007//biological r…
LOC110700656	XM_021878229.1,XM_021878228.1	12.963	8.803	8.35	6.786	0.387023	0.570649	0.181029	0.431425	0.486168	0.10822	1.13944	8.66846e-05	9.28676e-06	NA	K09566//peptidyl-prolyl isomerase G (cyclophilin G) [EC:5.2.1.8];K20478//golgin subfamily B member 1;K09566//peptidyl-prolyl isomerase G (cyclophilin G) [EC:5.2.1.8];K20478//golgin subfamily B member 1	XP_021733920.1|0.0e+00|uncharacterized protein LOC110700656 [Chenopodium quinoa]	GO:0005488//binding;GO:0005516//calmodulin binding;GO:0005515//protein binding;
LOC110700669	XM_021878247.1	62.546	68.566	53.833	33.636	0.706457	0.323275	0.0607511	1.05961	0.0712904	0.00572333	1.09632	0.0084864	0.00165565	NA	K18211//synaptosomal-associated protein 25	XP_021733939.1|2.6e-177|SNAP25 homologous protein SNAP33-like [Chenopodium quinoa]	GO:0006810//transport;GO:0008104//protein localization;GO:0006886//intracellular protein transport;GO:0071702//organic substance transport;GO:0045184//establishment of protein localization;GO:0071705//nitrogen compound transport;GO:0051641//cellular localization;GO:0033036//macromolecule localization;GO:0046907//intracellular transport;GO:0034613//cellular protein localization;GO:0051179//localiz…
LOC110700730	XM_021878330.1,XM_021878331.1,XM_021878329.1	11.603	5.23	6.623	4.133	0.71879	0.344921	0.0683301	0.429734	0.71846	0.253989	1.66419	1.20447e-05	1.06783e-06	TCP	NA	XP_021734021.1|3.2e-231|transcription factor TCP17-like [Chenopodium quinoa]	GO:0003700//DNA-binding transcription factor activity;GO:0140110//transcription regulator activity;
LOC110700829	XM_021878414.1	3.8	1.696	2.913	1.136	1.17084	0.227602	0.0330752	0.56646	0.802945	0.339032	1.77787	0.0117281	0.00241781	NA	K04733//interleukin-1 receptor-associated kinase 4 [EC:2.7.11.1]	XP_021734106.1|9.8e-117|inactive LRR receptor-like serine/threonine-protein kinase BIR2 [Chenopodium quinoa]	GO:0030554//adenyl nucleotide binding;GO:0043168//anion binding;GO:0032559//adenyl ribonucleotide binding;GO:0097367//carbohydrate derivative binding;GO:0140096//catalytic activity, acting on a protein;GO:0097159//organic cyclic compound binding;GO:0032553//ribonucleotide binding;GO:0043167//ion binding;GO:0036094//small molecule binding;GO:0005488//binding;GO:0003824//catalytic activity;GO:00167…
LOC110700850	XM_021878434.1,BGI_novel_T009921	5.786	2.973	3.03	2.203	0.513928	0.389241	0.0857479	0.524694	0.405859	0.0779807	1.59075	7.07986e-09	3.56519e-10	NA	K00276//primary-amine oxidase [EC:1.4.3.21]+ko00410//beta-Alanine metabolism+ko00960//Tropane, piperidine and pyridine alkaloid biosynthesis+ko00350//Tyrosine metabolism+ko01100//Metabolic pathways+ko00950//Isoquinoline alkaloid biosynthesis+ko01110//Biosynthesis of secondary metabolites+ko00260//Glycine, serine and threonine metabolism+ko00360//Phenylalanine metabolism;K04733//interleukin-1 rece…	XP_021734126.1|0.0e+00|uncharacterized protein LOC110700850 [Chenopodium quinoa]	NA
LOC110700853	XM_021878437.1	0.986	0.463	0.64	0.29	0.703008	0.723727	0.313551	0.579044	0.82317	0.366249	1.70499	0.0423149	0.0110589	NA	K12393//AP-1 complex subunit mu	XP_021734129.1|1.2e-244|AP-1 complex subunit mu-2-like [Chenopodium quinoa]	GO:0051649//establishment of localization in cell;GO:0034613//cellular protein localization;GO:0071702//organic substance transport;GO:0033036//macromolecule localization;GO:0070727//cellular macromolecule localization;GO:0016192//vesicle-mediated transport;GO:0042886//amide transport;GO:0015031//protein transport;GO:0015833//peptide transport;GO:0051641//cellular localization;GO:0071705//nitroge…
LOC110700948	XM_021878513.1,XM_021878512.1	13.363	7.473	9.02	5.46	0.801108	2.48692e-05	2.99243e-07	0.560878	0.00868771	0.000396427	1.51035	3.74086e-24	4.49445e-26	NA	K22403//zinc finger MIZ domain-containing protein;K22403//zinc finger MIZ domain-containing protein	XP_021734204.1|0.0e+00|E3 SUMO-protein ligase SIZ1-like [Chenopodium quinoa]	GO:0043227//membrane-bounded organelle;GO:0043226//organelle;GO:0043231//intracellular membrane-bounded organelle;GO:0110165//cellular anatomical entity;GO:0005634//nucleus;GO:0005622//intracellular;GO:0043229//intracellular organelle;GO:0043169//cation binding;GO:0019789//SUMO transferase activity;GO:0016740//transferase activity;GO:0003824//catalytic activity;GO:0019787//ubiquitin-like protein …
LOC110700961	XM_021878520.1,XM_021878521.1	15.796	6.666	8.266	5.843	0.578594	0.0353514	0.00198045	0.300244	0.434995	0.0874239	1.64881	3.25048e-17	6.76023e-19	NA	K09312//homeobox protein CDX1/4;K18730//PERQ amino acid-rich with GYF domain-containing protein;K21951//homeobox protein Hox-A11;K09312//homeobox protein CDX1/4;K18730//PERQ amino acid-rich with GYF domain-containing protein;K21951//homeobox protein Hox-A11	XP_021734213.1|3.4e-293|homeobox-DDT domain protein RLT1-like isoform X2 [Chenopodium quinoa]	GO:0005634//nucleus;GO:0043229//intracellular organelle;GO:0043231//intracellular membrane-bounded organelle;GO:0005622//intracellular;GO:0043226//organelle;GO:0043227//membrane-bounded organelle;GO:0110165//cellular anatomical entity;GO:1901363//heterocyclic compound binding;GO:0003677//DNA binding;GO:0003676//nucleic acid binding;GO:0005488//binding;GO:0097159//organic cyclic compound binding;
LOC110700965	XM_021878530.1	13.463	5.316	6.043	5.266	0.259063	0.897239	0.56656	0.120679	0.953165	0.7946	1.5162	0.00239703	0.000384786	NA	NA	XP_021734222.1|3.3e-145|uncharacterized protein DDB_G0286175-like [Chenopodium quinoa]	NA
LOC110701016	XM_021878594.1,XM_021878593.1	11.136	2.56	3.993	2.753	0.612572	0.29311	0.0510699	0.0244601	0.995653	0.943574	2.22784	5.24385e-15	1.32145e-16	NA	K04733//interleukin-1 receptor-associated kinase 4 [EC:2.7.11.1];K04733//interleukin-1 receptor-associated kinase 4 [EC:2.7.11.1]	XP_021734285.1|0.0e+00|G-type lectin S-receptor-like serine/threonine-protein kinase SD2-5 isoform X1 [Chenopodium quinoa]	NA
LOC110701037	XM_021878622.1	0.636	0.243	0.606	0.203	1.39844	0.103053	0.00924004	0.318354	0.919583	0.577603	1.69474	0.0191884	0.00429644	NA	K01184//polygalacturonase [EC:3.2.1.15]+ko00040//Pentose and glucuronate interconversions+ko01100//Metabolic pathways	XP_021734314.1|5.1e-245|polygalacturonase-like [Chenopodium quinoa]	NA
LOC110701059	XM_021878647.1	2.393	0.736	0.776	0.553	0.551273	0.392302	0.0869349	0.490688	0.552368	0.140219	2.26357	4.55868e-10	1.96046e-11	NA	K17422//large subunit ribosomal protein L41;K13420//LRR receptor-like serine/threonine-protein kinase FLS2 [EC:2.7.11.1]+ko04016//MAPK signaling pathway - plant+ko04626//Plant-pathogen interaction	XP_021734339.1|0.0e+00|receptor-like protein kinase [Chenopodium quinoa]	GO:0110165//cellular anatomical entity;GO:0031224//intrinsic component of membrane;GO:0016020//membrane;GO:0016021//integral component of membrane;GO:0036094//small molecule binding;GO:0003824//catalytic activity;GO:0004672//protein kinase activity;GO:0005488//binding;GO:0004674//protein serine/threonine kinase activity;GO:0005524//ATP binding;GO:0097159//organic cyclic compound binding;GO:004316…
LOC110701060	XM_021878648.1	4.253	1.533	2.586	1.276	1.02912	0.0734898	0.00563249	0.342563	0.854077	0.406566	1.90276	2.37569e-06	1.81355e-07	NA	K17422//large subunit ribosomal protein L41;K13420//LRR receptor-like serine/threonine-protein kinase FLS2 [EC:2.7.11.1]+ko04016//MAPK signaling pathway - plant+ko04626//Plant-pathogen interaction	XP_021734340.1|0.0e+00|receptor-like protein kinase [Chenopodium quinoa]	GO:0110165//cellular anatomical entity;GO:0031224//intrinsic component of membrane;GO:0016021//integral component of membrane;GO:0016020//membrane;GO:0030554//adenyl nucleotide binding;GO:0000166//nucleotide binding;GO:0043168//anion binding;GO:0035639//purine ribonucleoside triphosphate binding;GO:0017076//purine nucleotide binding;GO:0016301//kinase activity;GO:0016772//transferase activity, tr…
LOC110701071	XM_021878662.1	57.146	19.123	27.073	10.633	1.24417	0.0914352	0.00772288	0.895608	0.129679	0.013276	2.55981	1.78528e-12	5.76498e-14	NA	K08057//calreticulin+ko04145//Phagosome+ko04141//Protein processing in endoplasmic reticulum	XP_021734354.1|8.4e-268|calreticulin-3-like [Chenopodium quinoa]	NA
[truncated: 4,733 more rows]

## Sheet: alkaline only
gene_id_alias	gene_transcript_id	average_fpkm_saline	average_fpkm_PEG	average_fpkm_alkaline	average_fpkm_CK	diffexp_log2fc_CK-vs-alkaline	diffexp_deseq2_qvalue_CK-vs-alkaline	diffexp_pvalue_CK-vs-alkaline	diffexp_log2fc_CK-vs-PEG	diffexp_deseq2_qvalue_CK-vs-PEG	diffexp_pvalue_CK-vs-PEG	diffexp_log2fc_CK-vs-saline	diffexp_deseq2_qvalue_CK-vs-saline	diffexp_pvalue_CK-vs-saline	desc_tf	desc_kegg	desc_nr	desc_go
[truncated: 261 more rows]

[truncated: 5 more sheets: hyperosmotic only, saline&hyperosmotic, alkaline&hyperosmotic, saline&alkaline, saline&alkaline&hyperosmotic]
