# Supplementary material for: Transcriptome and Small RNA Sequencing Reveals the Basis of Response to Salinity, Alkalinity and Hypertonia in Quinoa (Chenopodium quinoa Willd.)
Source: Int J Mol Sci. 2023 Jul 22;24(14):11789. doi: 10.3390/ijms241411789 (PMC10380837; doi:10.3390/ijms241411789)
Supplement: Supplementary file 1 [file ijms-24-11789-s001.zip › Tab.S4 GO and KEGG annotation of quinoa genes.xls]

## Sheet: Sheet1
gene_id	description_kegg	description_go
BGI_novel_G003065	K00847//fructokinase [EC:2.7.1.4]+ko00520//Amino sugar and nucleotide sugar metabolism+ko01100//Metabolic pathways+ko00051//Fructose and mannose metabolism+ko00500//Starch and sucrose metabolism	NA
LOC110707776	K10781//fatty acyl-ACP thioesterase B [EC:3.1.2.14 3.1.2.21]+ko01100//Metabolic pathways+ko00061//Fatty acid biosynthesis+ko01212//Fatty acid metabolism	NA
BGI_novel_G001638	K04733//interleukin-1 receptor-associated kinase 4 [EC:2.7.11.1]	NA
LOC110737462	K15718//linoleate 9S-lipoxygenase [EC:1.13.11.58]+ko00591//Linoleic acid metabolism;K11322//enhancer of polycomb-like protein;K09533//DnaJ homolog subfamily C member 13	NA
LOC110705052	K12670//oligosaccharyltransferase complex subunit beta+ko04141//Protein processing in endoplasmic reticulum+ko00510//N-Glycan biosynthesis+ko01100//Metabolic pathways	GO:1901137//carbohydrate derivative biosynthetic process;GO:0009101//glycoprotein biosynthetic process;GO:0009059//macromolecule biosynthetic process;GO:0044267//cellular protein metabolic process;GO:1901135//carbohydrate derivative metabolic process;GO:0043170//macromolecule metabolic process;GO:0009987//cellular process;GO:0070085//glycosylation;GO:0018279//protein N-linked glycosylation via as…
LOC110716308	K06950//uncharacterized protein;K06950//uncharacterized protein	NA
LOC110729432	K22072//iron-sulfur cluster assembly 2;K22072//iron-sulfur cluster assembly 2	GO:0008152//metabolic process;GO:0097428//protein maturation by iron-sulfur cluster transfer;GO:0043170//macromolecule metabolic process;GO:1901564//organonitrogen compound metabolic process;GO:0071704//organic substance metabolic process;GO:0010467//gene expression;GO:0019538//protein metabolic process;GO:0006807//nitrogen compound metabolic process;GO:0051604//protein maturation;GO:0044238//pri…
LOC110734860	K20363//protein YIPF5/7	GO:0016787//hydrolase activity;GO:0003824//catalytic activity;
LOC110729417	K09260//MADS-box transcription enhancer factor 2A;K12412//pheromone receptor transcription factor;K04733//interleukin-1 receptor-associated kinase 4 [EC:2.7.11.1]	GO:0110165//cellular anatomical entity;GO:0005634//nucleus;GO:0043227//membrane-bounded organelle;GO:0005622//intracellular;GO:0043229//intracellular organelle;GO:0043226//organelle;GO:0043231//intracellular membrane-bounded organelle;GO:0046983//protein dimerization activity;GO:0003676//nucleic acid binding;GO:0005488//binding;GO:0003677//DNA binding;GO:0005515//protein binding;GO:1901363//heter…
LOC110694016	K17964//leucine-rich PPR motif-containing protein, mitochondrial;K17964//leucine-rich PPR motif-containing protein, mitochondrial	NA
LOC110714596	K21626//cyclin-D1-binding protein 1	GO:0065007//biological regulation;GO:0051726//regulation of cell cycle;GO:0050794//regulation of cellular process;GO:0050789//regulation of biological process;
LOC110728291	K15718//linoleate 9S-lipoxygenase [EC:1.13.11.58]+ko00591//Linoleic acid metabolism;K08176//MFS transporter, PHS family, inorganic phosphate transporter;K09754//5-O-(4-coumaroyl)-D-quinate 3'-monooxygenase [EC:1.14.14.96]+ko01100//Metabolic pathways+ko01110//Biosynthesis of secondary metabolites+ko00940//Phenylpropanoid biosynthesis+ko00941//Flavonoid biosynthesis+ko00945//Stilbenoid, diarylhepta…	NA
LOC110729613	K03327//multidrug resistance protein, MATE family	GO:0031224//intrinsic component of membrane;GO:0110165//cellular anatomical entity;GO:0016021//integral component of membrane;GO:0016020//membrane;GO:0042910//xenobiotic transmembrane transporter activity;GO:0015297//antiporter activity;GO:0005215//transporter activity;GO:0022857//transmembrane transporter activity;GO:0015291//secondary active transmembrane transporter activity;GO:0022804//active…
BGI_novel_G002648	K20642//Rho GTPase-activating protein 22/24/25	GO:0065007//biological regulation;GO:0009987//cellular process;GO:0050794//regulation of cellular process;GO:0023052//signaling;GO:0050896//response to stimulus;GO:0007154//cell communication;GO:0051716//cellular response to stimulus;GO:0007165//signal transduction;GO:0050789//regulation of biological process;
LOC110693536	NA	GO:0110165//cellular anatomical entity;GO:0031224//intrinsic component of membrane;GO:0016020//membrane;GO:0016021//integral component of membrane;
LOC110686046	K00053//ketol-acid reductoisomerase [EC:1.1.1.86]+ko00290//Valine, leucine and isoleucine biosynthesis+ko00770//Pantothenate and CoA biosynthesis+ko01230//Biosynthesis of amino acids+ko01100//Metabolic pathways+ko01110//Biosynthesis of secondary metabolites+ko01210//2-Oxocarboxylic acid metabolism	GO:0006520//cellular amino acid metabolic process;GO:0009987//cellular process;GO:0044283//small molecule biosynthetic process;GO:0016053//organic acid biosynthetic process;GO:0009082//branched-chain amino acid biosynthetic process;GO:0009058//biosynthetic process;GO:0044281//small molecule metabolic process;GO:0006573//valine metabolic process;GO:0071704//organic substance metabolic process;GO:1…
LOC110716169	K16296//serine carboxypeptidase-like clade I [EC:3.4.16.-];K18195//rhamnogalacturonan endolyase [EC:4.2.2.23]	NA
LOC110702960	K15901//EKC/KEOPS complex subunit CGI121/TPRKB	GO:0043226//organelle;GO:0005737//cytoplasm;GO:0110165//cellular anatomical entity;GO:0043231//intracellular membrane-bounded organelle;GO:0043229//intracellular organelle;GO:0043227//membrane-bounded organelle;GO:0005634//nucleus;GO:0005622//intracellular;GO:0005829//cytosol;
LOC110740153	K02218//casein kinase 1 [EC:2.7.11.1];K05291//phosphatidylinositol glycan, class S+ko01100//Metabolic pathways+ko00563//Glycosylphosphatidylinositol (GPI)-anchor biosynthesis;K00430//peroxidase [EC:1.11.1.7]+ko01100//Metabolic pathways+ko01110//Biosynthesis of secondary metabolites+ko00940//Phenylpropanoid biosynthesis;K14318//nuclear pore complex protein Nup88+ko03013//RNA transport;K07904//Ras-…	NA
LOC110706348	K00521//ferric-chelate reductase [EC:1.16.1.7];K13126//polyadenylate-binding protein+ko03015//mRNA surveillance pathway+ko03018//RNA degradation+ko03013//RNA transport;K16296//serine carboxypeptidase-like clade I [EC:3.4.16.-];K12862//pleiotropic regulator 1+ko03040//Spliceosome	GO:0019222//regulation of metabolic process;GO:0080090//regulation of primary metabolic process;GO:0010556//regulation of macromolecule biosynthetic process;GO:0031323//regulation of cellular metabolic process;GO:0050794//regulation of cellular process;GO:0051171//regulation of nitrogen compound metabolic process;GO:0065007//biological regulation;GO:0031326//regulation of cellular biosynthetic pr…
LOC110686613	K17086//transmembrane 9 superfamily member 2/4;K04733//interleukin-1 receptor-associated kinase 4 [EC:2.7.11.1];K17604//zinc finger SWIM domain-containing protein 3	NA
LOC110711560	K20777//exonuclease 3'-5' domain-containing protein 2 [EC:3.1.11.1]	GO:0003676//nucleic acid binding;GO:1901363//heterocyclic compound binding;GO:0005488//binding;GO:0097159//organic cyclic compound binding;GO:0004518//nuclease activity;GO:0008408//3'-5' exonuclease activity;GO:0004527//exonuclease activity;GO:0016787//hydrolase activity;GO:0016788//hydrolase activity, acting on ester bonds;GO:0003824//catalytic activity;
LOC110701814	K08202//MFS transporter, OCT family, solute carrier family 22 (organic cation transporter), member 4/5	NA
LOC110711503	K00030//isocitrate dehydrogenase (NAD+) [EC:1.1.1.41]+ko00020//Citrate cycle (TCA cycle)+ko01230//Biosynthesis of amino acids+ko01100//Metabolic pathways+ko01110//Biosynthesis of secondary metabolites+ko01210//2-Oxocarboxylic acid metabolism+ko01200//Carbon metabolism;K11844//ubiquitin carboxyl-terminal hydrolase 16/45 [EC:3.4.19.12];K10406//kinesin family member C2/C3	GO:0005829//cytosol;GO:0005622//intracellular;GO:0005737//cytoplasm;GO:0110165//cellular anatomical entity;GO:0097159//organic cyclic compound binding;GO:0003676//nucleic acid binding;GO:0005488//binding;GO:1901363//heterocyclic compound binding;
LOC110702627	K11420//euchromatic histone-lysine N-methyltransferase [EC:2.1.1.43]+ko00310//Lysine degradation	GO:0005622//intracellular;GO:0005634//nucleus;GO:0043226//organelle;GO:0043228//non-membrane-bounded organelle;GO:0043227//membrane-bounded organelle;GO:0043231//intracellular membrane-bounded organelle;GO:0110165//cellular anatomical entity;GO:0043229//intracellular organelle;GO:0043232//intracellular non-membrane-bounded organelle;GO:0005694//chromosome;GO:0008276//protein methyltransferase act…
LOC110699686	K04460//serine/threonine-protein phosphatase 5 [EC:3.1.3.16];K00134//glyceraldehyde 3-phosphate dehydrogenase [EC:1.2.1.12]+ko00010//Glycolysis / Gluconeogenesis+ko01230//Biosynthesis of amino acids+ko01100//Metabolic pathways+ko01110//Biosynthesis of secondary metabolites+ko00710//Carbon fixation in photosynthetic organisms+ko01200//Carbon metabolism;K12448//UDP-arabinose 4-epimerase [EC:5.1.3.5…	NA
LOC110685697	K01426//amidase [EC:3.5.1.4]+ko00380//Tryptophan metabolism+ko00330//Arginine and proline metabolism+ko00360//Phenylalanine metabolism;K06630//14-3-3 protein epsilon;K03006//DNA-directed RNA polymerase II subunit RPB1 [EC:2.7.7.6]+ko03020//RNA polymerase;K16040//trans-resveratrol di-O-methyltransferase [EC:2.1.1.240]+ko00945//Stilbenoid, diarylheptanoid and gingerol biosynthesis;K01051//pectinest…	NA
LOC110718225	K11968//ariadne-1 [EC:2.3.2.31]	GO:0004842//ubiquitin-protein transferase activity;GO:0005488//binding;GO:0043167//ion binding;GO:0140096//catalytic activity, acting on a protein;GO:0043169//cation binding;GO:0046872//metal ion binding;GO:0016740//transferase activity;GO:0019787//ubiquitin-like protein transferase activity;GO:0003824//catalytic activity;
LOC110728973	K00797//spermidine synthase [EC:2.5.1.16]+ko00410//beta-Alanine metabolism+ko00330//Arginine and proline metabolism+ko01100//Metabolic pathways+ko00270//Cysteine and methionine metabolism+ko00480//Glutathione metabolism;K00797//spermidine synthase [EC:2.5.1.16]+ko00410//beta-Alanine metabolism+ko00330//Arginine and proline metabolism+ko01100//Metabolic pathways+ko00270//Cysteine and methionine me…	GO:0006576//cellular biogenic amine metabolic process;GO:0042401//cellular biogenic amine biosynthetic process;GO:1901564//organonitrogen compound metabolic process;GO:0009987//cellular process;GO:0044249//cellular biosynthetic process;GO:0034641//cellular nitrogen compound metabolic process;GO:0071704//organic substance metabolic process;GO:0008152//metabolic process;GO:0006807//nitrogen compoun…
LOC110721984	K22503//aspartyl-tRNA synthetase [EC:6.1.1.12]+ko00970//Aminoacyl-tRNA biosynthesis;K20290//conserved oligomeric Golgi complex subunit 3;K21919//BTB/POZ domain-containing protein KCTD9;K02575//MFS transporter, NNP family, nitrate/nitrite transporter+ko00910//Nitrogen metabolism	NA
BGI_novel_G004521	K03006//DNA-directed RNA polymerase II subunit RPB1 [EC:2.7.7.6]+ko03020//RNA polymerase;K03549//KUP system potassium uptake protein;K22686//pro-apoptotic serine protease NMA111 [EC:3.4.21.-]	GO:0046483//heterocycle metabolic process;GO:0006139//nucleobase-containing compound metabolic process;GO:0006259//DNA metabolic process;GO:0006725//cellular aromatic compound metabolic process;GO:0043170//macromolecule metabolic process;GO:0044238//primary metabolic process;GO:0006807//nitrogen compound metabolic process;GO:0071704//organic substance metabolic process;GO:0044260//cellular macrom…
LOC110689144	K09286//EREBP-like factor	GO:0043229//intracellular organelle;GO:0110165//cellular anatomical entity;GO:0005622//intracellular;GO:0043231//intracellular membrane-bounded organelle;GO:0043226//organelle;GO:0005634//nucleus;GO:0043227//membrane-bounded organelle;GO:0003700//DNA-binding transcription factor activity;GO:0140110//transcription regulator activity;GO:1901363//heterocyclic compound binding;GO:0003677//DNA binding…
BGI_novel_G003262	NA	GO:0015833//peptide transport;GO:0061024//membrane organization;GO:0015031//protein transport;GO:0051649//establishment of localization in cell;GO:0007006//mitochondrial membrane organization;GO:0072594//establishment of protein localization to organelle;GO:0033365//protein localization to organelle;GO:0017038//protein import;GO:0072657//protein localization to membrane;GO:0051179//localization;G…
LOC110738867	K15363//fanconi-associated nuclease 1 [EC:3.1.21.- 3.1.4.1];K01807//ribose 5-phosphate isomerase A [EC:5.3.1.6]+ko00030//Pentose phosphate pathway+ko01230//Biosynthesis of amino acids+ko01100//Metabolic pathways+ko01110//Biosynthesis of secondary metabolites+ko00710//Carbon fixation in photosynthetic organisms+ko01200//Carbon metabolism;K03687//molecular chaperone GrpE	GO:0006810//transport;GO:0055085//transmembrane transport;GO:0051234//establishment of localization;GO:0009987//cellular process;GO:0051179//localization;GO:0031224//intrinsic component of membrane;GO:0110165//cellular anatomical entity;GO:0016021//integral component of membrane;GO:0016020//membrane;
LOC110727907	K02885//large subunit ribosomal protein L19e+ko03010//Ribosome	GO:0008152//metabolic process;GO:0032259//methylation;GO:0016740//transferase activity;GO:0003824//catalytic activity;GO:0008168//methyltransferase activity;GO:0016741//transferase activity, transferring one-carbon groups;
LOC110686726	K10643//CCR4-NOT transcription complex subunit 4 [EC:2.3.2.27]+ko03018//RNA degradation	GO:0032991//protein-containing complex;GO:0005622//intracellular;GO:0030014//CCR4-NOT complex;GO:0004842//ubiquitin-protein transferase activity;GO:0016740//transferase activity;GO:0003824//catalytic activity;GO:0140096//catalytic activity, acting on a protein;GO:0019787//ubiquitin-like protein transferase activity;
LOC110733629	K17768//mitochondrial import receptor subunit TOM70;K21991//protein unc-45	NA
LOC110701388	K17964//leucine-rich PPR motif-containing protein, mitochondrial	NA
LOC110714443	K00679//phospholipid:diacylglycerol acyltransferase [EC:2.3.1.158]+ko01100//Metabolic pathways+ko00561//Glycerolipid metabolism;K01188//beta-glucosidase [EC:3.2.1.21]+ko01100//Metabolic pathways+ko00500//Starch and sucrose metabolism+ko01110//Biosynthesis of secondary metabolites+ko00460//Cyanoamino acid metabolism+ko00940//Phenylpropanoid biosynthesis;K16280//E3 ubiquitin-protein ligase RGLG [EC…	NA
LOC110688606	K11423//histone-lysine N-methyltransferase SETD2 [EC:2.1.1.43]+ko00310//Lysine degradation	NA
LOC110739571	K17604//zinc finger SWIM domain-containing protein 3	NA
LOC110692698	K20283//golgin subfamily A member 4	NA
LOC110702943	K17413//small subunit ribosomal protein S35	NA
LOC110713969	K20496//laurate 7-monooxygenase [EC:1.14.14.130];K20496//laurate 7-monooxygenase [EC:1.14.14.130]	GO:0046872//metal ion binding;GO:0003824//catalytic activity;GO:0005488//binding;GO:0097159//organic cyclic compound binding;GO:0016491//oxidoreductase activity;GO:0004497//monooxygenase activity;GO:0005506//iron ion binding;GO:0020037//heme binding;GO:0016705//oxidoreductase activity, acting on paired donors, with incorporation or reduction of molecular oxygen;GO:0046906//tetrapyrrole binding;GO…
LOC110684402	K01951//GMP synthase (glutamine-hydrolysing) [EC:6.3.5.2]+ko00230//Purine metabolism+ko01100//Metabolic pathways	GO:1901564//organonitrogen compound metabolic process;GO:0044238//primary metabolic process;GO:0008152//metabolic process;GO:0009064//glutamine family amino acid metabolic process;GO:0043436//oxoacid metabolic process;GO:0071704//organic substance metabolic process;GO:1901605//alpha-amino acid metabolic process;GO:0006807//nitrogen compound metabolic process;GO:0019752//carboxylic acid metabolic …
LOC110725477	K20478//golgin subfamily B member 1;K18626//trichohyalin	NA
LOC110684350	K02218//casein kinase 1 [EC:2.7.11.1];K05291//phosphatidylinositol glycan, class S+ko01100//Metabolic pathways+ko00563//Glycosylphosphatidylinositol (GPI)-anchor biosynthesis;K07904//Ras-related protein Rab-11A+ko04144//Endocytosis;K14318//nuclear pore complex protein Nup88+ko03013//RNA transport;K15334//multisite-specific tRNA:(cytosine-C5)-methyltransferase [EC:2.1.1.202];K13484//5-hydroxyisour…	NA
LOC110698106	NA	GO:0071944//cell periphery;GO:0031224//intrinsic component of membrane;GO:0005886//plasma membrane;GO:0016021//integral component of membrane;GO:0016020//membrane;GO:0110165//cellular anatomical entity;
BGI_novel_G002851	K18156//mitochondrial inner membrane protease ATP23 [EC:3.4.24.-]	GO:0016787//hydrolase activity;GO:0070011//peptidase activity, acting on L-amino acid peptides;GO:0046872//metal ion binding;GO:0004222//metalloendopeptidase activity;GO:0003824//catalytic activity;GO:0004175//endopeptidase activity;GO:0140096//catalytic activity, acting on a protein;GO:0005488//binding;GO:0043167//ion binding;GO:0008237//metallopeptidase activity;GO:0043169//cation binding;GO:00…
LOC110712808	K11294//nucleolin	GO:0019222//regulation of metabolic process;GO:1903506//regulation of nucleic acid-templated transcription;GO:2000112//regulation of cellular macromolecule biosynthetic process;GO:0010556//regulation of macromolecule biosynthetic process;GO:0051171//regulation of nitrogen compound metabolic process;GO:0050789//regulation of biological process;GO:0050794//regulation of cellular process;GO:0065007/…
LOC110704768	K00261//glutamate dehydrogenase (NAD(P)+) [EC:1.4.1.3]+ko00250//Alanine, aspartate and glutamate metabolism+ko00910//Nitrogen metabolism+ko00220//Arginine biosynthesis+ko01100//Metabolic pathways+ko01200//Carbon metabolism	GO:0046395//carboxylic acid catabolic process;GO:0006807//nitrogen compound metabolic process;GO:0007154//cell communication;GO:1901565//organonitrogen compound catabolic process;GO:0009056//catabolic process;GO:1901606//alpha-amino acid catabolic process;GO:0006082//organic acid metabolic process;GO:0009987//cellular process;GO:0009063//cellular amino acid catabolic process;GO:0006995//cellular …
LOC110691324	K14209//solute carrier family 36 (proton-coupled amino acid transporter);K15015//solute carrier family 32 (vesicular inhibitory amino acid transporter)	NA
BGI_novel_G002029	K08332//vacuolar protein 8;K04733//interleukin-1 receptor-associated kinase 4 [EC:2.7.11.1];K10260//F-box and WD-40 domain protein 7+ko04120//Ubiquitin mediated proteolysis	GO:0019787//ubiquitin-like protein transferase activity;GO:0003824//catalytic activity;GO:0004842//ubiquitin-protein transferase activity;GO:0140096//catalytic activity, acting on a protein;GO:0016740//transferase activity;
LOC110736378	K13093//HIV Tat-specific factor 1;K13093//HIV Tat-specific factor 1	NA
LOC110722138	K14638//solute carrier family 15 (peptide/histidine transporter), member 3/4;K14638//solute carrier family 15 (peptide/histidine transporter), member 3/4	GO:0031224//intrinsic component of membrane;GO:0016020//membrane;GO:0016021//integral component of membrane;GO:0110165//cellular anatomical entity;
LOC110722860	K17964//leucine-rich PPR motif-containing protein, mitochondrial	NA
LOC110727406	K03283//heat shock 70kDa protein 1/2/6/8+ko03040//Spliceosome+ko04144//Endocytosis+ko04141//Protein processing in endoplasmic reticulum	NA
LOC110725959	K08150//MFS transporter, SP family, solute carrier family 2 (myo-inositol transporter), member 13	GO:0016020//membrane;GO:0031224//intrinsic component of membrane;GO:0110165//cellular anatomical entity;GO:0016021//integral component of membrane;GO:0022857//transmembrane transporter activity;GO:0005215//transporter activity;
LOC110734442	K02875//large subunit ribosomal protein L14e+ko03010//Ribosome;K13783//MFS transporter, OPA family, solute carrier family 37 (glycerol-3-phosphate transporter), member 1/2;K22733//magnesium transporter	NA
LOC110685723	K22683//aspartyl protease family protein [EC:3.4.23.-]	NA
LOC110725960	K03126//transcription initiation factor TFIID subunit 12+ko03022//Basal transcription factors;K03126//transcription initiation factor TFIID subunit 12+ko03022//Basal transcription factors	NA
LOC110713748	K17086//transmembrane 9 superfamily member 2/4;K17604//zinc finger SWIM domain-containing protein 3	NA
BGI_novel_G002805	K09287//RAV-like factor	GO:0110165//cellular anatomical entity;GO:0005634//nucleus;GO:0005622//intracellular;GO:0043229//intracellular organelle;GO:0043226//organelle;GO:0043227//membrane-bounded organelle;GO:0043231//intracellular membrane-bounded organelle;GO:0003677//DNA binding;GO:1901363//heterocyclic compound binding;GO:0003700//DNA-binding transcription factor activity;GO:0140110//transcription regulator activity…
LOC110683079	K01537//Ca2+-transporting ATPase [EC:3.6.3.8]	NA
LOC110734789	NA	GO:0006807//nitrogen compound metabolic process;GO:0043043//peptide biosynthetic process;GO:0044238//primary metabolic process;GO:1901564//organonitrogen compound metabolic process;GO:0043170//macromolecule metabolic process;GO:0034641//cellular nitrogen compound metabolic process;GO:0034645//cellular macromolecule biosynthetic process;GO:0044271//cellular nitrogen compound biosynthetic process;G…
LOC110702756	K00326//cytochrome-b5 reductase [EC:1.6.2.2]+ko00520//Amino sugar and nucleotide sugar metabolism;K00326//cytochrome-b5 reductase [EC:1.6.2.2]+ko00520//Amino sugar and nucleotide sugar metabolism	GO:0046872//metal ion binding;GO:0097159//organic cyclic compound binding;GO:0043169//cation binding;GO:0020037//heme binding;GO:0043167//ion binding;GO:0046906//tetrapyrrole binding;GO:1901363//heterocyclic compound binding;GO:0005488//binding;
LOC110711268	K10393//kinesin family member 2/24;K17604//zinc finger SWIM domain-containing protein 3	NA
LOC110702582	NA	GO:0016021//integral component of membrane;GO:0110165//cellular anatomical entity;GO:0031224//intrinsic component of membrane;GO:0016020//membrane;
LOC110711914	K03364//cell division cycle 20-like protein 1, cofactor of APC complex+ko04120//Ubiquitin mediated proteolysis;K13963//serpin B	NA
LOC110712598	K22503//aspartyl-tRNA synthetase [EC:6.1.1.12]+ko00970//Aminoacyl-tRNA biosynthesis;K20290//conserved oligomeric Golgi complex subunit 3;K21919//BTB/POZ domain-containing protein KCTD9;K02575//MFS transporter, NNP family, nitrate/nitrite transporter+ko00910//Nitrogen metabolism	NA
LOC110695821	K22804//structural maintenance of chromosomes protein 6;K01188//beta-glucosidase [EC:3.2.1.21]+ko01100//Metabolic pathways+ko00500//Starch and sucrose metabolism+ko01110//Biosynthesis of secondary metabolites+ko00460//Cyanoamino acid metabolism+ko00940//Phenylpropanoid biosynthesis;K01213//galacturan 1,4-alpha-galacturonidase [EC:3.2.1.67]+ko00040//Pentose and glucuronate interconversions+ko01100…	NA
BGI_novel_G000738	K17675//ATP-dependent RNA helicase SUPV3L1/SUV3 [EC:3.6.4.13]	GO:0009628//response to abiotic stimulus;GO:0009555//pollen development;GO:0032502//developmental process;GO:0009939//positive regulation of gibberellic acid mediated signaling pathway;GO:0050794//regulation of cellular process;GO:0048856//anatomical structure development;GO:0034641//cellular nitrogen compound metabolic process;GO:0009967//positive regulation of signal transduction;GO:0009553//em…
LOC110730856	K08507//unconventional SNARE in the endoplasmic reticulum protein 1+ko04130//SNARE interactions in vesicular transport;K08507//unconventional SNARE in the endoplasmic reticulum protein 1+ko04130//SNARE interactions in vesicular transport;K08507//unconventional SNARE in the endoplasmic reticulum protein 1+ko04130//SNARE interactions in vesicular transport	NA
LOC110708008	NA	GO:0003676//nucleic acid binding;GO:0097159//organic cyclic compound binding;GO:1901363//heterocyclic compound binding;GO:0005488//binding;GO:0003677//DNA binding;
LOC110694709	K09250//cellular nucleic acid-binding protein	GO:0097159//organic cyclic compound binding;GO:0046872//metal ion binding;GO:0043167//ion binding;GO:0046914//transition metal ion binding;GO:0003676//nucleic acid binding;GO:0008270//zinc ion binding;GO:0043169//cation binding;GO:1901363//heterocyclic compound binding;GO:0005488//binding;
BGI_novel_G004202	K00215//4-hydroxy-tetrahydrodipicolinate reductase [EC:1.17.1.8]+ko00300//Lysine biosynthesis+ko01230//Biosynthesis of amino acids+ko01100//Metabolic pathways+ko01110//Biosynthesis of secondary metabolites+ko00261//Monobactam biosynthesis	NA
LOC110739169	K00799//glutathione S-transferase [EC:2.5.1.18]+ko00480//Glutathione metabolism	NA
LOC110686186	K11426//SET and MYND domain-containing protein;K17710//pentatricopeptide repeat domain-containing protein 1	NA
LOC110701421	K17604//zinc finger SWIM domain-containing protein 3	NA
LOC110695993	K02716//photosystem II oxygen-evolving enhancer protein 1+ko01100//Metabolic pathways+ko00195//Photosynthesis	GO:0050789//regulation of biological process;GO:0009987//cellular process;GO:0006091//generation of precursor metabolites and energy;GO:0019684//photosynthesis, light reaction;GO:0042548//regulation of photosynthesis, light reaction;GO:0010207//photosystem II assembly;GO:0055114//oxidation-reduction process;GO:0019222//regulation of metabolic process;GO:0022607//cellular component assembly;GO:004…
LOC110703730	K04733//interleukin-1 receptor-associated kinase 4 [EC:2.7.11.1];K04733//interleukin-1 receptor-associated kinase 4 [EC:2.7.11.1];K04733//interleukin-1 receptor-associated kinase 4 [EC:2.7.11.1];K04733//interleukin-1 receptor-associated kinase 4 [EC:2.7.11.1]	GO:0016020//membrane;GO:0110165//cellular anatomical entity;GO:0016021//integral component of membrane;GO:0031224//intrinsic component of membrane;GO:0016773//phosphotransferase activity, alcohol group as acceptor;GO:1901363//heterocyclic compound binding;GO:0043167//ion binding;GO:0017076//purine nucleotide binding;GO:0097159//organic cyclic compound binding;GO:0004672//protein kinase activity;G…
BGI_novel_G001318	K09486//hypoxia up-regulated 1+ko04141//Protein processing in endoplasmic reticulum	NA
LOC110682080	K02941//large subunit ribosomal protein LP0+ko03010//Ribosome;K22733//magnesium transporter	NA
LOC110701777	NA	GO:0016787//hydrolase activity;GO:0016788//hydrolase activity, acting on ester bonds;GO:0003824//catalytic activity;
LOC110739113	K12603//CCR4-NOT transcription complex subunit 6 [EC:3.1.13.4]+ko03018//RNA degradation;K12603//CCR4-NOT transcription complex subunit 6 [EC:3.1.13.4]+ko03018//RNA degradation;K12603//CCR4-NOT transcription complex subunit 6 [EC:3.1.13.4]+ko03018//RNA degradation;K12603//CCR4-NOT transcription complex subunit 6 [EC:3.1.13.4]+ko03018//RNA degradation;K12603//CCR4-NOT transcription complex subunit …	NA
LOC110728034	K15718//linoleate 9S-lipoxygenase [EC:1.13.11.58]+ko00591//Linoleic acid metabolism;K09754//5-O-(4-coumaroyl)-D-quinate 3'-monooxygenase [EC:1.14.14.96]+ko01100//Metabolic pathways+ko01110//Biosynthesis of secondary metabolites+ko00940//Phenylpropanoid biosynthesis+ko00941//Flavonoid biosynthesis+ko00945//Stilbenoid, diarylheptanoid and gingerol biosynthesis;K08176//MFS transporter, PHS family, i…	NA
LOC110728073	K16578//CLIP-associating protein 1/2;K16578//CLIP-associating protein 1/2	NA
LOC110717188	K01647//citrate synthase [EC:2.3.3.1]+ko00020//Citrate cycle (TCA cycle)+ko01230//Biosynthesis of amino acids+ko01100//Metabolic pathways+ko01110//Biosynthesis of secondary metabolites+ko01210//2-Oxocarboxylic acid metabolism+ko01200//Carbon metabolism+ko00630//Glyoxylate and dicarboxylate metabolism;K01647//citrate synthase [EC:2.3.3.1]+ko00020//Citrate cycle (TCA cycle)+ko01230//Biosynthesis of…	GO:0044238//primary metabolic process;GO:0009060//aerobic respiration;GO:0008152//metabolic process;GO:0043436//oxoacid metabolic process;GO:0045333//cellular respiration;GO:0071704//organic substance metabolic process;GO:0009987//cellular process;GO:0072350//tricarboxylic acid metabolic process;GO:0006091//generation of precursor metabolites and energy;GO:0044237//cellular metabolic process;GO:0…
LOC110684696	K08867//WNK lysine deficient protein kinase [EC:2.7.11.1];K11838//ubiquitin carboxyl-terminal hydrolase 7 [EC:3.4.19.12]	NA
LOC110714512	K14684//solute carrier family 25 (mitochondrial phosphate transporter), member 23/24/25/41;K14684//solute carrier family 25 (mitochondrial phosphate transporter), member 23/24/25/41	GO:0110165//cellular anatomical entity;GO:0031224//intrinsic component of membrane;GO:0016021//integral component of membrane;GO:0016020//membrane;GO:0000295//adenine nucleotide transmembrane transporter activity;GO:0015932//nucleobase-containing compound transmembrane transporter activity;GO:0015075//ion transmembrane transporter activity;GO:0005347//ATP transmembrane transporter activity;GO:000…
LOC110694881	K00815//tyrosine aminotransferase [EC:2.6.1.5]+ko00130//Ubiquinone and other terpenoid-quinone biosynthesis+ko01230//Biosynthesis of amino acids+ko00960//Tropane, piperidine and pyridine alkaloid biosynthesis+ko00350//Tyrosine metabolism+ko01100//Metabolic pathways+ko00950//Isoquinoline alkaloid biosynthesis+ko01110//Biosynthesis of secondary metabolites+ko00270//Cysteine and methionine metabolis…	NA
LOC110703404	K14484//auxin-responsive protein IAA+ko04075//Plant hormone signal transduction	GO:0050794//regulation of cellular process;GO:0007165//signal transduction;GO:0080090//regulation of primary metabolic process;GO:1903506//regulation of nucleic acid-templated transcription;GO:0009987//cellular process;GO:0019222//regulation of metabolic process;GO:0010556//regulation of macromolecule biosynthetic process;GO:0051252//regulation of RNA metabolic process;GO:0009889//regulation of b…
LOC110696645	K00700//1,4-alpha-glucan branching enzyme [EC:2.4.1.18]+ko01100//Metabolic pathways+ko00500//Starch and sucrose metabolism+ko01110//Biosynthesis of secondary metabolites;K00700//1,4-alpha-glucan branching enzyme [EC:2.4.1.18]+ko01100//Metabolic pathways+ko00500//Starch and sucrose metabolism+ko01110//Biosynthesis of secondary metabolites;K00700//1,4-alpha-glucan branching enzyme [EC:2.4.1.18]+ko0…	GO:0044237//cellular metabolic process;GO:0000271//polysaccharide biosynthetic process;GO:1901576//organic substance biosynthetic process;GO:0044042//glucan metabolic process;GO:0009250//glucan biosynthetic process;GO:0043170//macromolecule metabolic process;GO:0044262//cellular carbohydrate metabolic process;GO:0015980//energy derivation by oxidation of organic compounds;GO:0009058//biosynthetic…
LOC110736552	K00430//peroxidase [EC:1.11.1.7]+ko01100//Metabolic pathways+ko01110//Biosynthesis of secondary metabolites+ko00940//Phenylpropanoid biosynthesis	NA
LOC110736796	K01807//ribose 5-phosphate isomerase A [EC:5.3.1.6]+ko00030//Pentose phosphate pathway+ko01230//Biosynthesis of amino acids+ko01100//Metabolic pathways+ko01110//Biosynthesis of secondary metabolites+ko00710//Carbon fixation in photosynthetic organisms+ko01200//Carbon metabolism	GO:0009987//cellular process;GO:0044237//cellular metabolic process;GO:0055114//oxidation-reduction process;GO:0006793//phosphorus metabolic process;GO:0006091//generation of precursor metabolites and energy;GO:1901135//carbohydrate derivative metabolic process;GO:0019637//organophosphate metabolic process;GO:0006098//pentose-phosphate shunt;GO:0006739//NADP metabolic process;GO:0006740//NADPH re…
LOC110693524	K17871//NADH:ubiquinone reductase (non-electrogenic) [EC:1.6.5.9]	GO:0016491//oxidoreductase activity;GO:0003824//catalytic activity;GO:0005509//calcium ion binding;GO:0043169//cation binding;GO:0005488//binding;GO:0043167//ion binding;GO:0046872//metal ion binding;
LOC110730881	K08597//sentrin-specific protease 8 [EC:3.4.22.68];K08597//sentrin-specific protease 8 [EC:3.4.22.68]	NA
LOC110684713	K00966//mannose-1-phosphate guanylyltransferase [EC:2.7.7.13]+ko00520//Amino sugar and nucleotide sugar metabolism+ko01100//Metabolic pathways+ko00051//Fructose and mannose metabolism+ko01110//Biosynthesis of secondary metabolites;K00966//mannose-1-phosphate guanylyltransferase [EC:2.7.7.13]+ko00520//Amino sugar and nucleotide sugar metabolism+ko01100//Metabolic pathways+ko00051//Fructose and man…	GO:0008152//metabolic process;GO:0009058//biosynthetic process;GO:0016779//nucleotidyltransferase activity;GO:0016740//transferase activity;GO:0016772//transferase activity, transferring phosphorus-containing groups;GO:0003824//catalytic activity;
LOC110698561	K06892//feruloyl-CoA ortho-hydroxylase [EC:1.14.11.-]+ko01110//Biosynthesis of secondary metabolites+ko00940//Phenylpropanoid biosynthesis;K05278//flavonol synthase [EC:1.14.20.6]+ko01100//Metabolic pathways+ko01110//Biosynthesis of secondary metabolites+ko00941//Flavonoid biosynthesis	GO:0016491//oxidoreductase activity;GO:0046872//metal ion binding;GO:0043169//cation binding;GO:0043167//ion binding;GO:0003824//catalytic activity;GO:0005488//binding;
LOC110681935	K15272//solute carrier family 35 (UDP-sugar transporter), member A1/2/3;K15272//solute carrier family 35 (UDP-sugar transporter), member A1/2/3	GO:0031224//intrinsic component of membrane;GO:0016021//integral component of membrane;GO:0043231//intracellular membrane-bounded organelle;GO:0043229//intracellular organelle;GO:0043227//membrane-bounded organelle;GO:0016020//membrane;GO:0005622//intracellular;GO:0098588//bounding membrane of organelle;GO:0005737//cytoplasm;GO:0031090//organelle membrane;GO:0000139//Golgi membrane;GO:0043226//or…
LOC110718426	K09838//zeaxanthin epoxidase [EC:1.14.15.21]+ko00906//Carotenoid biosynthesis+ko01100//Metabolic pathways+ko01110//Biosynthesis of secondary metabolites	NA
LOC110719838	K12823//ATP-dependent RNA helicase DDX5/DBP2 [EC:3.6.4.13]+ko03040//Spliceosome;K12823//ATP-dependent RNA helicase DDX5/DBP2 [EC:3.6.4.13]+ko03040//Spliceosome	GO:0016787//hydrolase activity;GO:0032555//purine ribonucleotide binding;GO:0005524//ATP binding;GO:0017076//purine nucleotide binding;GO:0035639//purine ribonucleoside triphosphate binding;GO:0016818//hydrolase activity, acting on acid anhydrides, in phosphorus-containing anhydrides;GO:0003824//catalytic activity;GO:1901363//heterocyclic compound binding;GO:0043167//ion binding;GO:0016817//hydro…
LOC110722601	K01770//2-C-methyl-D-erythritol 2,4-cyclodiphosphate synthase [EC:4.6.1.12]+ko00900//Terpenoid backbone biosynthesis+ko01100//Metabolic pathways+ko01110//Biosynthesis of secondary metabolites	GO:0008299//isoprenoid biosynthetic process;GO:0044255//cellular lipid metabolic process;GO:0071704//organic substance metabolic process;GO:0006629//lipid metabolic process;GO:0008152//metabolic process;GO:0044249//cellular biosynthetic process;GO:0044238//primary metabolic process;GO:0008610//lipid biosynthetic process;GO:0044237//cellular metabolic process;GO:0009058//biosynthetic process;GO:19…
LOC110697016	NA	GO:0046872//metal ion binding;GO:0043167//ion binding;GO:0043169//cation binding;GO:0005488//binding;
LOC110689117	K01303//acylaminoacyl-peptidase [EC:3.4.19.1];K00799//glutathione S-transferase [EC:2.5.1.18]+ko00480//Glutathione metabolism;K08176//MFS transporter, PHS family, inorganic phosphate transporter	NA
LOC110737915	K08202//MFS transporter, OCT family, solute carrier family 22 (organic cation transporter), member 4/5	GO:0016021//integral component of membrane;GO:0016020//membrane;GO:0031224//intrinsic component of membrane;GO:0110165//cellular anatomical entity;GO:0005215//transporter activity;GO:0022857//transmembrane transporter activity;
LOC110681844	K00430//peroxidase [EC:1.11.1.7]+ko01100//Metabolic pathways+ko01110//Biosynthesis of secondary metabolites+ko00940//Phenylpropanoid biosynthesis	GO:0044248//cellular catabolic process;GO:0009987//cellular process;GO:0044237//cellular metabolic process;GO:0008152//metabolic process;GO:0050896//response to stimulus;GO:0042744//hydrogen peroxide catabolic process;GO:0042743//hydrogen peroxide metabolic process;GO:0006979//response to oxidative stress;GO:0072593//reactive oxygen species metabolic process;GO:0006950//response to stress;GO:0009…
LOC110711026	K19996//phosphatidylinositol transfer protein SFH5	NA
LOC110732699	K11294//nucleolin;K11294//nucleolin	NA
LOC110695869	K05391//cyclic nucleotide gated channel, plant+ko04626//Plant-pathogen interaction;K20352//p24 family protein delta-1;K08738//cytochrome c	NA
LOC110728327	K11253//histone H3;K17604//zinc finger SWIM domain-containing protein 3	NA
LOC110717474	NA	GO:0016020//membrane;GO:0016021//integral component of membrane;GO:0110165//cellular anatomical entity;GO:0031224//intrinsic component of membrane;
LOC110717735	K06180//23S rRNA pseudouridine1911/1915/1917 synthase [EC:5.4.99.23];K22733//magnesium transporter	GO:0046872//metal ion binding;GO:0043169//cation binding;GO:0046914//transition metal ion binding;GO:0043167//ion binding;GO:0008270//zinc ion binding;GO:0005488//binding;
LOC110740268	K17604//zinc finger SWIM domain-containing protein 3	NA
LOC110738978	K14486//auxin response factor+ko04075//Plant hormone signal transduction	GO:0032870//cellular response to hormone stimulus;GO:0071495//cellular response to endogenous stimulus;GO:0050794//regulation of cellular process;GO:0050789//regulation of biological process;GO:0010556//regulation of macromolecule biosynthetic process;GO:0031326//regulation of cellular biosynthetic process;GO:0071365//cellular response to auxin stimulus;GO:0051171//regulation of nitrogen compound…
LOC110722989	K10523//speckle-type POZ protein;K04077//chaperonin GroEL+ko03018//RNA degradation;K12355//coniferyl-aldehyde dehydrogenase [EC:1.2.1.68]+ko00940//Phenylpropanoid biosynthesis	NA
LOC110700444	K14611//solute carrier family 23 (nucleobase transporter), member 1/2;K14611//solute carrier family 23 (nucleobase transporter), member 1/2	GO:0016020//membrane;GO:0031224//intrinsic component of membrane;GO:0016021//integral component of membrane;GO:0110165//cellular anatomical entity;GO:0005215//transporter activity;GO:0022857//transmembrane transporter activity;
BGI_novel_G003834	K06066//CBF1 interacting corepressor;K08867//WNK lysine deficient protein kinase [EC:2.7.11.1]	NA
LOC110710204	K02925//large subunit ribosomal protein L3e+ko03010//Ribosome;K12524//bifunctional aspartokinase / homoserine dehydrogenase 1 [EC:2.7.2.4 1.1.1.3]+ko00300//Lysine biosynthesis+ko01230//Biosynthesis of amino acids+ko01100//Metabolic pathways+ko01110//Biosynthesis of secondary metabolites+ko00261//Monobactam biosynthesis+ko00260//Glycine, serine and threonine metabolism+ko00270//Cysteine and methio…	NA
BGI_novel_G002988	K15400//omega-hydroxypalmitate O-feruloyl transferase [EC:2.3.1.188]+ko00073//Cutin, suberine and wax biosynthesis;K03544//ATP-dependent Clp protease ATP-binding subunit ClpX	GO:1901135//carbohydrate derivative metabolic process;GO:0044237//cellular metabolic process;GO:0019637//organophosphate metabolic process;GO:0009987//cellular process;GO:0006793//phosphorus metabolic process;GO:0008152//metabolic process;GO:0006002//fructose 6-phosphate metabolic process;GO:0006796//phosphate-containing compound metabolic process;GO:0071704//organic substance metabolic process;G…
LOC110681678	NA	GO:0060255//regulation of macromolecule metabolic process;GO:0031327//negative regulation of cellular biosynthetic process;GO:0019222//regulation of metabolic process;GO:0065007//biological regulation;GO:0010558//negative regulation of macromolecule biosynthetic process;GO:0031326//regulation of cellular biosynthetic process;GO:0009892//negative regulation of metabolic process;GO:2000113//negativ…
LOC110712703	K08360//cytochrome b-561 [EC:7.2.1.3]	GO:0016020//membrane;GO:0031224//intrinsic component of membrane;GO:0110165//cellular anatomical entity;GO:0016021//integral component of membrane;GO:0016491//oxidoreductase activity;GO:0003824//catalytic activity;
LOC110731406	K04733//interleukin-1 receptor-associated kinase 4 [EC:2.7.11.1]	NA
BGI_novel_G004969	K02937//large subunit ribosomal protein L7e+ko03010//Ribosome;K22804//structural maintenance of chromosomes protein 6	GO:0004519//endonuclease activity;GO:0004518//nuclease activity;GO:0004523//RNA-DNA hybrid ribonuclease activity;GO:0003676//nucleic acid binding;GO:1901363//heterocyclic compound binding;GO:0016893//endonuclease activity, active with either ribo- or deoxyribonucleic acids and producing 5'-phosphomonoesters;GO:0097159//organic cyclic compound binding;GO:0003824//catalytic activity;GO:0016787//hyd…
LOC110708578	K10664//E3 ubiquitin-protein ligase ATL6/9/15/31/42/55 [EC:2.3.2.27]	GO:0016021//integral component of membrane;GO:0016020//membrane;GO:0031224//intrinsic component of membrane;GO:0110165//cellular anatomical entity;
LOC110717921	K02987//small subunit ribosomal protein S4e+ko03010//Ribosome	NA
LOC110694024	K00279//cytokinin dehydrogenase [EC:1.5.99.12]+ko00908//Zeatin biosynthesis	NA
LOC110694137	K08235//xyloglucan:xyloglucosyl transferase [EC:2.4.1.207]	GO:0071555//cell wall organization;GO:0010411//xyloglucan metabolic process;GO:0044042//glucan metabolic process;GO:0005975//carbohydrate metabolic process;GO:0006073//cellular glucan metabolic process;GO:0005976//polysaccharide metabolic process;GO:0044262//cellular carbohydrate metabolic process;GO:0010383//cell wall polysaccharide metabolic process;GO:0044238//primary metabolic process;GO:0010…
LOC110714989	K21626//cyclin-D1-binding protein 1	GO:0050794//regulation of cellular process;GO:0051726//regulation of cell cycle;GO:0065007//biological regulation;GO:0050789//regulation of biological process;
LOC110731289	K00895//diphosphate-dependent phosphofructokinase [EC:2.7.1.90]+ko00010//Glycolysis / Gluconeogenesis+ko00030//Pentose phosphate pathway+ko01100//Metabolic pathways+ko00051//Fructose and mannose metabolism+ko01110//Biosynthesis of secondary metabolites	GO:0071704//organic substance metabolic process;GO:0006796//phosphate-containing compound metabolic process;GO:1901135//carbohydrate derivative metabolic process;GO:0044237//cellular metabolic process;GO:0009987//cellular process;GO:0019637//organophosphate metabolic process;GO:0006793//phosphorus metabolic process;GO:0006002//fructose 6-phosphate metabolic process;GO:0008152//metabolic process;G…
LOC110713927	K14500//BR-signaling kinase [EC:2.7.11.1]+ko04075//Plant hormone signal transduction	GO:0016773//phosphotransferase activity, alcohol group as acceptor;GO:1901363//heterocyclic compound binding;GO:0003824//catalytic activity;GO:0043168//anion binding;GO:0016772//transferase activity, transferring phosphorus-containing groups;GO:0097367//carbohydrate derivative binding;GO:0000166//nucleotide binding;GO:0030554//adenyl nucleotide binding;GO:0043167//ion binding;GO:0032559//adenyl r…
LOC110696864	K18195//rhamnogalacturonan endolyase [EC:4.2.2.23];K04733//interleukin-1 receptor-associated kinase 4 [EC:2.7.11.1];K14857//AdoMet-dependent rRNA methyltransferase SPB1 [EC:2.1.1.-]	NA
LOC110689799	K13201//nucleolysin TIA-1/TIAR	NA
LOC110698338	K13832//3-dehydroquinate dehydratase / shikimate dehydrogenase [EC:4.2.1.10 1.1.1.25]+ko01230//Biosynthesis of amino acids+ko01100//Metabolic pathways+ko01110//Biosynthesis of secondary metabolites+ko00400//Phenylalanine, tyrosine and tryptophan biosynthesis;K23048//RING finger protein unkempt;K13832//3-dehydroquinate dehydratase / shikimate dehydrogenase [EC:4.2.1.10 1.1.1.25]+ko01230//Biosynthe…	GO:0043169//cation binding;GO:0046872//metal ion binding;GO:0005488//binding;GO:0043167//ion binding;
LOC110727635	K08857//NIMA (never in mitosis gene a)-related kinase 1/4/5 [EC:2.7.11.1];K22696//protein-lysine N-methyltransferase EEF2KMT [EC:2.1.1.-]	NA
LOC110696947	K17604//zinc finger SWIM domain-containing protein 3	NA
LOC110685532	K19040//E3 ubiquitin-protein ligase ATL10/75/76/77/78 [EC:2.3.2.27];K15706//E3 ubiquitin-protein ligase RNF167 [EC:2.3.2.27]	GO:0016020//membrane;GO:0031224//intrinsic component of membrane;GO:0110165//cellular anatomical entity;GO:0016021//integral component of membrane;
LOC110709070	K14499//BRI1 kinase inhibitor 1+ko04075//Plant hormone signal transduction	GO:0016020//membrane;GO:0071944//cell periphery;GO:0110165//cellular anatomical entity;GO:0005886//plasma membrane;GO:0004857//enzyme inhibitor activity;GO:0019207//kinase regulator activity;GO:0030234//enzyme regulator activity;GO:0019210//kinase inhibitor activity;GO:0098772//molecular function regulator;
LOC110713888	K04733//interleukin-1 receptor-associated kinase 4 [EC:2.7.11.1]	GO:0016020//membrane;GO:0110165//cellular anatomical entity;GO:0031224//intrinsic component of membrane;GO:0016021//integral component of membrane;GO:0140096//catalytic activity, acting on a protein;GO:0005488//binding;GO:0097367//carbohydrate derivative binding;GO:0032555//purine ribonucleotide binding;GO:0032553//ribonucleotide binding;GO:0016740//transferase activity;GO:0017076//purine nucleot…
LOC110713373	K10579//ubiquitin-conjugating enzyme E2 M+ko04120//Ubiquitin mediated proteolysis;K10579//ubiquitin-conjugating enzyme E2 M+ko04120//Ubiquitin mediated proteolysis	GO:0000166//nucleotide binding;GO:0036094//small molecule binding;GO:0097367//carbohydrate derivative binding;GO:0032559//adenyl ribonucleotide binding;GO:0005524//ATP binding;GO:1901363//heterocyclic compound binding;GO:0043167//ion binding;GO:0005488//binding;GO:0030554//adenyl nucleotide binding;GO:0043168//anion binding;GO:0016740//transferase activity;GO:0017076//purine nucleotide binding;GO…
LOC110683390	K11644//paired amphipathic helix protein Sin3a;K14486//auxin response factor+ko04075//Plant hormone signal transduction;K11644//paired amphipathic helix protein Sin3a;K14486//auxin response factor+ko04075//Plant hormone signal transduction	GO:0043169//cation binding;GO:0046872//metal ion binding;GO:0005488//binding;GO:0043167//ion binding;
BGI_novel_G000004	K03046//DNA-directed RNA polymerase subunit beta' [EC:2.7.7.6]+ko03020//RNA polymerase	GO:0110165//cellular anatomical entity;GO:0043231//intracellular membrane-bounded organelle;GO:0043227//membrane-bounded organelle;GO:0043229//intracellular organelle;GO:0009570//chloroplast stroma;GO:0005737//cytoplasm;GO:0031224//intrinsic component of membrane;GO:0043226//organelle;GO:0009507//chloroplast;GO:0016021//integral component of membrane;GO:0009536//plastid;GO:0005622//intracellular;…
LOC110698826	K06573//solute carrier family 4 (anion exchanger), member 1;K04733//interleukin-1 receptor-associated kinase 4 [EC:2.7.11.1];K13862//solute carrier family 4 (sodium borate transporter), member 11	GO:0016021//integral component of membrane;GO:0016020//membrane;GO:0031224//intrinsic component of membrane;GO:0110165//cellular anatomical entity;GO:0022857//transmembrane transporter activity;GO:0005452//inorganic anion exchanger activity;GO:0022853//active ion transmembrane transporter activity;GO:0015103//inorganic anion transmembrane transporter activity;GO:0015318//inorganic molecular entit…
LOC110683452	K10140//DNA damage-binding protein 2+ko03420//Nucleotide excision repair+ko04120//Ubiquitin mediated proteolysis	GO:0044238//primary metabolic process;GO:0006139//nucleobase-containing compound metabolic process;GO:0051716//cellular response to stimulus;GO:0008152//metabolic process;GO:0006259//DNA metabolic process;GO:0044237//cellular metabolic process;GO:0050896//response to stimulus;GO:0033554//cellular response to stress;GO:0090304//nucleic acid metabolic process;GO:0043170//macromolecule metabolic pro…
LOC110690028	NA	GO:0110165//cellular anatomical entity;GO:0016021//integral component of membrane;GO:0031224//intrinsic component of membrane;GO:0016020//membrane;GO:0016740//transferase activity;GO:0003824//catalytic activity;GO:0008168//methyltransferase activity;GO:0016741//transferase activity, transferring one-carbon groups;
LOC110734001	K18195//rhamnogalacturonan endolyase [EC:4.2.2.23];K14297//nuclear pore complex protein Nup98-Nup96+ko03013//RNA transport;K20178//vacuolar protein sorting-associated protein 8	NA
LOC110731768	K17795//mitochondrial import inner membrane translocase subunit TIM17	NA
LOC110708002	K18789//xylogalacturonan beta-1,3-xylosyltransferase [EC:2.4.2.41]	NA
LOC110681936	K07342//protein transport protein SEC61 subunit gamma and related proteins+ko04145//Phagosome+ko04141//Protein processing in endoplasmic reticulum+ko03060//Protein export	GO:0051179//localization;GO:0006605//protein targeting;GO:0051234//establishment of localization;GO:0046907//intracellular transport;GO:0006810//transport;GO:0042886//amide transport;GO:0045184//establishment of protein localization;GO:0071705//nitrogen compound transport;GO:0033036//macromolecule localization;GO:0071702//organic substance transport;GO:0008104//protein localization;GO:0070727//ce…
LOC110709931	K17545//serine/threonine-protein kinase ULK4 [EC:2.7.11.1];K14561//U3 small nucleolar ribonucleoprotein protein IMP4+ko03008//Ribosome biogenesis in eukaryotes;K11593//eukaryotic translation initiation factor 2C;K03517//quinolinate synthase [EC:2.5.1.72]+ko01100//Metabolic pathways+ko00760//Nicotinate and nicotinamide metabolism	NA
LOC110723085	K17583//nucleolar MIF4G domain-containing protein 1;K02326//DNA polymerase epsilon subunit 3 [EC:2.7.7.7]+ko03420//Nucleotide excision repair+ko03030//DNA replication+ko03410//Base excision repair;K13181//ATP-dependent RNA helicase DDX27 [EC:3.6.4.13];K11279//nucleosome assembly protein 1-like 1	NA
LOC110711094	K04733//interleukin-1 receptor-associated kinase 4 [EC:2.7.11.1];K04733//interleukin-1 receptor-associated kinase 4 [EC:2.7.11.1]	NA
LOC110738821	K13082//bifunctional dihydroflavonol 4-reductase/flavanone 4-reductase [EC:1.1.1.219 1.1.1.234]+ko01100//Metabolic pathways+ko01110//Biosynthesis of secondary metabolites+ko00941//Flavonoid biosynthesis	GO:0003824//catalytic activity;
LOC110687424	K22138//mitochondrial pyruvate carrier 1	GO:0051234//establishment of localization;GO:0034220//ion transmembrane transport;GO:0071702//organic substance transport;GO:1903825//organic acid transmembrane transport;GO:0051179//localization;GO:0046942//carboxylic acid transport;GO:0006820//anion transport;GO:0006810//transport;GO:0015711//organic anion transport;GO:0055085//transmembrane transport;GO:1905039//carboxylic acid transmembrane t…
LOC110738672	K03246//translation initiation factor 3 subunit I+ko03013//RNA transport	GO:0044271//cellular nitrogen compound biosynthetic process;GO:0006807//nitrogen compound metabolic process;GO:0022613//ribonucleoprotein complex biogenesis;GO:0044249//cellular biosynthetic process;GO:0001732//formation of cytoplasmic translation initiation complex;GO:0034641//cellular nitrogen compound metabolic process;GO:0008152//metabolic process;GO:1901566//organonitrogen compound biosynthe…
LOC110733852	K19984//exocyst complex component 5	GO:0009987//cellular process;GO:0032940//secretion by cell;GO:0051179//localization;GO:0140352//export from cell;GO:0051234//establishment of localization;GO:0006887//exocytosis;GO:0046903//secretion;GO:0016192//vesicle-mediated transport;GO:0006810//transport;GO:0032991//protein-containing complex;GO:0099023//vesicle tethering complex;GO:0005737//cytoplasm;GO:0000145//exocyst;GO:0110165//cellula…
LOC110734593	K14489//arabidopsis histidine kinase 2/3/4 (cytokinin receptor) [EC:2.7.13.3]+ko04075//Plant hormone signal transduction	NA
LOC110715243	K03283//heat shock 70kDa protein 1/2/6/8+ko03040//Spliceosome+ko04144//Endocytosis+ko04141//Protein processing in endoplasmic reticulum	NA
LOC110737015	K14485//transport inhibitor response 1+ko04075//Plant hormone signal transduction	NA
LOC110716146	K14442//ATP-dependent RNA helicase DHX36 [EC:3.6.4.13]+ko03018//RNA degradation	NA
LOC110719561	K22696//protein-lysine N-methyltransferase EEF2KMT [EC:2.1.1.-]	GO:0110165//cellular anatomical entity;GO:0016020//membrane;GO:0016021//integral component of membrane;GO:0031224//intrinsic component of membrane;
LOC110698086	K17193//anthocyanidin 3-O-glucoside 2'''-O-xylosyltransferase [EC:2.4.2.51]+ko00942//Anthocyanin biosynthesis	GO:0016758//transferase activity, transferring hexosyl groups;GO:0016757//transferase activity, transferring glycosyl groups;GO:0003824//catalytic activity;GO:0016740//transferase activity;
LOC110723459	K06630//14-3-3 protein epsilon;K06630//14-3-3 protein epsilon	GO:0016491//oxidoreductase activity;GO:0003824//catalytic activity;GO:0004497//monooxygenase activity;
LOC110692724	K03453//bile acid:Na+ symporter, BASS family	NA
LOC110721836	K00512//steroid 17alpha-monooxygenase / 17alpha-hydroxyprogesterone deacetylase [EC:1.14.14.19 1.14.14.32]+ko01100//Metabolic pathways	NA
LOC110726527	K14794//ribosomal RNA-processing protein 12	NA
LOC110701076	K03969//phage shock protein A	NA
LOC110719262	K09753//cinnamoyl-CoA reductase [EC:1.2.1.44]+ko01100//Metabolic pathways+ko01110//Biosynthesis of secondary metabolites+ko00940//Phenylpropanoid biosynthesis	NA
LOC110690660	K20858//calcium uniporter protein, mitochondrial;K15255//ATP-dependent DNA helicase PIF1 [EC:3.6.4.12];K20858//calcium uniporter protein, mitochondrial;K15255//ATP-dependent DNA helicase PIF1 [EC:3.6.4.12];K20858//calcium uniporter protein, mitochondrial;K15255//ATP-dependent DNA helicase PIF1 [EC:3.6.4.12];K20858//calcium uniporter protein, mitochondrial;K15255//ATP-dependent DNA helicase PIF1 […	NA
LOC110733049	K11797//PH-interacting protein;K11797//PH-interacting protein;K11797//PH-interacting protein	NA
LOC110715042	K03549//KUP system potassium uptake protein;K12153//phenylalanine N-monooxygenase [EC:1.14.14.40]+ko00966//Glucosinolate biosynthesis+ko01110//Biosynthesis of secondary metabolites+ko00460//Cyanoamino acid metabolism+ko01210//2-Oxocarboxylic acid metabolism;K14300//nuclear pore complex protein Nup133+ko03013//RNA transport	NA
LOC110727951	K05387//glutamate receptor, ionotropic, plant	NA
LOC110702868	K03686//molecular chaperone DnaJ;K03686//molecular chaperone DnaJ	GO:0009314//response to radiation;GO:0050896//response to stimulus;GO:0009628//response to abiotic stimulus;GO:0009416//response to light stimulus;GO:0009532//plastid stroma;GO:0005622//intracellular;GO:0043226//organelle;GO:0009570//chloroplast stroma;GO:0043227//membrane-bounded organelle;GO:0043229//intracellular organelle;GO:0043231//intracellular membrane-bounded organelle;GO:0005737//cytopl…
LOC110733912	K04733//interleukin-1 receptor-associated kinase 4 [EC:2.7.11.1]	GO:0043227//membrane-bounded organelle;GO:0043229//intracellular organelle;GO:0005634//nucleus;GO:0110165//cellular anatomical entity;GO:0043226//organelle;GO:0043231//intracellular membrane-bounded organelle;GO:0005622//intracellular;GO:0003676//nucleic acid binding;GO:1901363//heterocyclic compound binding;GO:0043565//sequence-specific DNA binding;GO:0003700//DNA-binding transcription factor ac…
LOC110734546	K15188//cyclin T;K15188//cyclin T	GO:0006357//regulation of transcription by RNA polymerase II;GO:0051171//regulation of nitrogen compound metabolic process;GO:0080090//regulation of primary metabolic process;GO:1903506//regulation of nucleic acid-templated transcription;GO:0065007//biological regulation;GO:0050794//regulation of cellular process;GO:0009889//regulation of biosynthetic process;GO:0010556//regulation of macromolecu…
LOC110694739	K18468//vacuolar protein sorting-associated protein 35+ko04144//Endocytosis	GO:0016482//cytosolic transport;GO:0051649//establishment of localization in cell;GO:0042147//retrograde transport, endosome to Golgi;GO:0051179//localization;GO:0015833//peptide transport;GO:0008104//protein localization;GO:0071702//organic substance transport;GO:0016197//endosomal transport;GO:0070727//cellular macromolecule localization;GO:0034613//cellular protein localization;GO:0045184//est…
BGI_novel_G005097	K01465//dihydroorotase [EC:3.5.2.3]+ko01100//Metabolic pathways+ko00240//Pyrimidine metabolism	NA
BGI_novel_G004328	K01193//beta-fructofuranosidase [EC:3.2.1.26]+ko01100//Metabolic pathways+ko00052//Galactose metabolism+ko00500//Starch and sucrose metabolism	NA
LOC110720640	K03062//26S proteasome regulatory subunit T2+ko03050//Proteasome	GO:0006807//nitrogen compound metabolic process;GO:0044238//primary metabolic process;GO:0009057//macromolecule catabolic process;GO:0071704//organic substance metabolic process;GO:0043170//macromolecule metabolic process;GO:0008152//metabolic process;GO:0009056//catabolic process;GO:0019538//protein metabolic process;GO:1901564//organonitrogen compound metabolic process;GO:1901565//organonitroge…
LOC110729818	K20728//vegetative storage protein 2+ko04016//MAPK signaling pathway - plant	GO:0042578//phosphoric ester hydrolase activity;GO:0016788//hydrolase activity, acting on ester bonds;GO:0016787//hydrolase activity;GO:0003824//catalytic activity;GO:0003993//acid phosphatase activity;GO:0016791//phosphatase activity;
BGI_novel_G002546	K03809//NAD(P)H dehydrogenase (quinone) [EC:1.6.5.2]+ko00130//Ubiquinone and other terpenoid-quinone biosynthesis+ko01100//Metabolic pathways+ko01110//Biosynthesis of secondary metabolites	GO:0043167//ion binding;GO:0000166//nucleotide binding;GO:0003955//NAD(P)H dehydrogenase (quinone) activity;GO:0043168//anion binding;GO:0010181//FMN binding;GO:0097159//organic cyclic compound binding;GO:0036094//small molecule binding;GO:1901265//nucleoside phosphate binding;GO:0097367//carbohydrate derivative binding;GO:0016655//oxidoreductase activity, acting on NAD(P)H, quinone or similar co…
LOC110722159	K17604//zinc finger SWIM domain-containing protein 3;K17604//zinc finger SWIM domain-containing protein 3;K17604//zinc finger SWIM domain-containing protein 3;K17604//zinc finger SWIM domain-containing protein 3	NA
LOC110693099	NA	GO:0005548//phospholipid transporter activity;GO:0017128//phospholipid scramblase activity;GO:0005215//transporter activity;GO:0140303//intramembrane lipid transporter activity;GO:0005319//lipid transporter activity;
LOC110726434	K03671//thioredoxin 1;K03671//thioredoxin 1	GO:0065007//biological regulation;GO:0042592//homeostatic process;GO:0050789//regulation of biological process;GO:0045454//cell redox homeostasis;GO:0050794//regulation of cellular process;GO:0065008//regulation of biological quality;GO:0019725//cellular homeostasis;GO:0009987//cellular process;
LOC110703351	K19476//vacuolar protein sorting-associated protein IST1+ko04144//Endocytosis;K19476//vacuolar protein sorting-associated protein IST1+ko04144//Endocytosis	NA
LOC110702673	K20368//protein cornichon;K00384//thioredoxin reductase (NADPH) [EC:1.8.1.9]+ko00450//Selenocompound metabolism;K00799//glutathione S-transferase [EC:2.5.1.18]+ko00480//Glutathione metabolism;K13484//5-hydroxyisourate hydrolase / 2-oxo-4-hydroxy-4-carboxy-5-ureidoimidazoline decarboxylase [EC:3.5.2.17 4.1.1.97]+ko00230//Purine metabolism+ko01100//Metabolic pathways	NA
LOC110705315	K11423//histone-lysine N-methyltransferase SETD2 [EC:2.1.1.43]+ko00310//Lysine degradation	NA
LOC110700513	K14794//ribosomal RNA-processing protein 12	NA
LOC110719444	K00432//glutathione peroxidase [EC:1.11.1.9]+ko00590//Arachidonic acid metabolism+ko00480//Glutathione metabolism;K00432//glutathione peroxidase [EC:1.11.1.9]+ko00590//Arachidonic acid metabolism+ko00480//Glutathione metabolism	GO:0050896//response to stimulus;GO:0006979//response to oxidative stress;GO:0006950//response to stress;GO:0110165//cellular anatomical entity;GO:0005737//cytoplasm;GO:0005622//intracellular;GO:0003824//catalytic activity;GO:0016684//oxidoreductase activity, acting on peroxide as acceptor;GO:0047066//phospholipid-hydroperoxide glutathione peroxidase activity;GO:0016209//antioxidant activity;GO:0…
LOC110705925	K13207//CUG-BP- and ETR3-like factor;K03257//translation initiation factor 4A+ko03013//RNA transport;K00161//pyruvate dehydrogenase E1 component alpha subunit [EC:1.2.4.1]+ko00010//Glycolysis / Gluconeogenesis+ko00020//Citrate cycle (TCA cycle)+ko01100//Metabolic pathways+ko01110//Biosynthesis of secondary metabolites+ko00620//Pyruvate metabolism+ko01200//Carbon metabolism	NA
LOC110698439	K13998//dihydrofolate reductase / thymidylate synthase [EC:1.5.1.3 2.1.1.45]+ko00670//One carbon pool by folate+ko01100//Metabolic pathways+ko00790//Folate biosynthesis+ko00240//Pyrimidine metabolism;K13998//dihydrofolate reductase / thymidylate synthase [EC:1.5.1.3 2.1.1.45]+ko00670//One carbon pool by folate+ko01100//Metabolic pathways+ko00790//Folate biosynthesis+ko00240//Pyrimidine metabolism…	GO:0006082//organic acid metabolic process;GO:0044271//cellular nitrogen compound biosynthetic process;GO:0009129//pyrimidine nucleoside monophosphate metabolic process;GO:0042558//pteridine-containing compound metabolic process;GO:0034641//cellular nitrogen compound metabolic process;GO:0009265//2'-deoxyribonucleotide biosynthetic process;GO:0009394//2'-deoxyribonucleotide metabolic process;GO:0…
BGI_novel_G004183	K02350//DNA polymerase zeta [EC:2.7.7.7];K21867//potassium channel;K04733//interleukin-1 receptor-associated kinase 4 [EC:2.7.11.1]	NA
LOC110733403	K13354//solute carrier family 25 (peroxisomal adenine nucleotide transporter), member 17+ko04146//Peroxisome	GO:0016020//membrane;GO:0031224//intrinsic component of membrane;GO:0110165//cellular anatomical entity;GO:0016021//integral component of membrane;
LOC110682010	K10751//chromatin assembly factor 1 subunit B	NA
BGI_novel_G004233	K02325//DNA polymerase epsilon subunit 2 [EC:2.7.7.7]+ko03420//Nucleotide excision repair+ko03030//DNA replication+ko03410//Base excision repair	NA
LOC110684330	K01193//beta-fructofuranosidase [EC:3.2.1.26]+ko01100//Metabolic pathways+ko00052//Galactose metabolism+ko00500//Starch and sucrose metabolism;K20849//fructan beta-(2,6)-fructosidase [EC:3.2.1.154];K01193//beta-fructofuranosidase [EC:3.2.1.26]+ko01100//Metabolic pathways+ko00052//Galactose metabolism+ko00500//Starch and sucrose metabolism	GO:0044238//primary metabolic process;GO:0008152//metabolic process;GO:0005975//carbohydrate metabolic process;GO:0071704//organic substance metabolic process;GO:0033949//fructan beta-(2,6)-fructosidase activity;GO:0004553//hydrolase activity, hydrolyzing O-glycosyl compounds;GO:0003824//catalytic activity;GO:0016798//hydrolase activity, acting on glycosyl bonds;GO:0016787//hydrolase activity;
LOC110708731	K11323//histone arginine demethylase JMJD6 [EC:1.14.11.-];K01414//oligopeptidase A [EC:3.4.24.70];K11323//histone arginine demethylase JMJD6 [EC:1.14.11.-];K01414//oligopeptidase A [EC:3.4.24.70];K11323//histone arginine demethylase JMJD6 [EC:1.14.11.-];K01414//oligopeptidase A [EC:3.4.24.70];K11323//histone arginine demethylase JMJD6 [EC:1.14.11.-];K01414//oligopeptidase A [EC:3.4.24.70]	GO:0043169//cation binding;GO:0046872//metal ion binding;GO:0043167//ion binding;GO:0005488//binding;
LOC110738496	K12355//coniferyl-aldehyde dehydrogenase [EC:1.2.1.68]+ko00940//Phenylpropanoid biosynthesis	NA
LOC110686084	NA	GO:0003824//catalytic activity;GO:0005488//binding;GO:0016893//endonuclease activity, active with either ribo- or deoxyribonucleic acids and producing 5'-phosphomonoesters;GO:0016788//hydrolase activity, acting on ester bonds;GO:1901363//heterocyclic compound binding;GO:0097159//organic cyclic compound binding;GO:0004521//endoribonuclease activity;GO:0004523//RNA-DNA hybrid ribonuclease activity;…
BGI_novel_G004683	NA	GO:0032259//methylation;GO:0008152//metabolic process;GO:0043226//organelle;GO:0043231//intracellular membrane-bounded organelle;GO:0005737//cytoplasm;GO:0043227//membrane-bounded organelle;GO:0009532//plastid stroma;GO:0010287//plastoglobule;GO:0110165//cellular anatomical entity;GO:0043229//intracellular organelle;GO:0005622//intracellular;GO:0009507//chloroplast;GO:0009570//chloroplast stroma;…
LOC110726574	K22794//flavonol-3-O-glucoside/galactoside glucosyltransferase [EC:2.4.1.239 2.4.1.-]+ko00944//Flavone and flavonol biosynthesis;K14326//regulator of nonsense transcripts 1 [EC:3.6.4.-]+ko03015//mRNA surveillance pathway+ko03013//RNA transport;K01230//mannosyl-oligosaccharide alpha-1,2-mannosidase [EC:3.2.1.113]+ko04141//Protein processing in endoplasmic reticulum+ko00510//N-Glycan biosynthesis+k…	NA
LOC110683518	K06955//uncharacterized protein	GO:0003824//catalytic activity;GO:0016491//oxidoreductase activity;
LOC110717063	K02898//large subunit ribosomal protein L26e+ko03010//Ribosome	GO:0044260//cellular macromolecule metabolic process;GO:0034641//cellular nitrogen compound metabolic process;GO:0034645//cellular macromolecule biosynthetic process;GO:1901576//organic substance biosynthetic process;GO:0044271//cellular nitrogen compound biosynthetic process;GO:0009059//macromolecule biosynthetic process;GO:0071704//organic substance metabolic process;GO:1901564//organonitrogen …
LOC110685708	K17604//zinc finger SWIM domain-containing protein 3	NA
LOC110688004	K20359//PRA1 family protein 1	GO:0031224//intrinsic component of membrane;GO:0016021//integral component of membrane;GO:0110165//cellular anatomical entity;GO:0016020//membrane;
LOC110710406	K06911//uncharacterized protein;K04733//interleukin-1 receptor-associated kinase 4 [EC:2.7.11.1]	GO:0016021//integral component of membrane;GO:0110165//cellular anatomical entity;GO:0016020//membrane;GO:0031224//intrinsic component of membrane;
BGI_novel_G004640	K22772//flavonol-3-O-glucoside L-rhamnosyltransferase [EC:2.4.1.159]+ko01110//Biosynthesis of secondary metabolites+ko00944//Flavone and flavonol biosynthesis	NA
LOC110716632	K00565//mRNA (guanine-N7-)-methyltransferase [EC:2.1.1.56]+ko03015//mRNA surveillance pathway	GO:0016740//transferase activity;GO:0008173//RNA methyltransferase activity;GO:0008168//methyltransferase activity;GO:0008757//S-adenosylmethionine-dependent methyltransferase activity;GO:0003824//catalytic activity;GO:0004482//mRNA (guanine-N7-)-methyltransferase activity;GO:0008174//mRNA methyltransferase activity;GO:0016741//transferase activity, transferring one-carbon groups;GO:0008170//N-me…
LOC110721457	NA	GO:0009987//cellular process;GO:0050896//response to stimulus;GO:0071496//cellular response to external stimulus;GO:0009605//response to external stimulus;GO:0033554//cellular response to stress;GO:0051716//cellular response to stimulus;GO:0042594//response to starvation;GO:0016036//cellular response to phosphate starvation;GO:0031669//cellular response to nutrient levels;GO:0031667//response to …
BGI_novel_G005195	K14638//solute carrier family 15 (peptide/histidine transporter), member 3/4	GO:0051179//localization;GO:0051234//establishment of localization;GO:0006810//transport;GO:0071705//nitrogen compound transport;GO:0015833//peptide transport;GO:0042886//amide transport;GO:0071702//organic substance transport;GO:0006857//oligopeptide transport;GO:0016020//membrane;GO:0016021//integral component of membrane;GO:0031224//intrinsic component of membrane;GO:0110165//cellular anatomic…
LOC110713280	K17604//zinc finger SWIM domain-containing protein 3	NA
LOC110701959	K20286//TATA element modulatory factor;K20478//golgin subfamily B member 1;K10406//kinesin family member C2/C3;K20286//TATA element modulatory factor;K20478//golgin subfamily B member 1;K10406//kinesin family member C2/C3	NA
LOC110704700	K00799//glutathione S-transferase [EC:2.5.1.18]+ko00480//Glutathione metabolism	NA
LOC110709461	K03327//multidrug resistance protein, MATE family;K03327//multidrug resistance protein, MATE family	GO:0110165//cellular anatomical entity;GO:0016021//integral component of membrane;GO:0016020//membrane;GO:0031224//intrinsic component of membrane;GO:0005215//transporter activity;GO:0022857//transmembrane transporter activity;GO:0015291//secondary active transmembrane transporter activity;GO:0042910//xenobiotic transmembrane transporter activity;GO:0015297//antiporter activity;GO:0022804//active…
LOC110705128	K18649//inositol-phosphate phosphatase / L-galactose 1-phosphate phosphatase / histidinol-phosphatase [EC:3.1.3.25 3.1.3.93 3.1.3.15]+ko01230//Biosynthesis of amino acids+ko01100//Metabolic pathways+ko00053//Ascorbate and aldarate metabolism+ko00340//Histidine metabolism+ko01110//Biosynthesis of secondary metabolites+ko04070//Phosphatidylinositol signaling system+ko00562//Inositol phosphate metab…	GO:0019751//polyol metabolic process;GO:1901616//organic hydroxy compound catabolic process;GO:0005975//carbohydrate metabolic process;GO:0044262//cellular carbohydrate metabolic process;GO:0046174//polyol catabolic process;GO:0046838//phosphorylated carbohydrate dephosphorylation;GO:0006066//alcohol metabolic process;GO:0008152//metabolic process;GO:1901575//organic substance catabolic process;G…
LOC110716400	K01303//acylaminoacyl-peptidase [EC:3.4.19.1];K10706//senataxin [EC:3.6.4.-];K01601//ribulose-bisphosphate carboxylase large chain [EC:4.1.1.39]+ko01100//Metabolic pathways+ko00710//Carbon fixation in photosynthetic organisms+ko01200//Carbon metabolism+ko00630//Glyoxylate and dicarboxylate metabolism;K00799//glutathione S-transferase [EC:2.5.1.18]+ko00480//Glutathione metabolism	NA
LOC110723049	NA	GO:0044238//primary metabolic process;GO:0009247//glycolipid biosynthetic process;GO:0071704//organic substance metabolic process;GO:0044249//cellular biosynthetic process;GO:0044237//cellular metabolic process;GO:0044255//cellular lipid metabolic process;GO:1903509//liposaccharide metabolic process;GO:1901576//organic substance biosynthetic process;GO:0009058//biosynthetic process;GO:0009987//ce…
LOC110708662	K12812//ATP-dependent RNA helicase UAP56/SUB2 [EC:3.6.4.13]+ko03040//Spliceosome+ko03015//mRNA surveillance pathway+ko03013//RNA transport;K04733//interleukin-1 receptor-associated kinase 4 [EC:2.7.11.1]	NA
LOC110692363	K07893//Ras-related protein Rab-6A	GO:0007264//small GTPase mediated signal transduction;GO:0016197//endosomal transport;GO:0051179//localization;GO:0035556//intracellular signal transduction;GO:0023052//signaling;GO:0050789//regulation of biological process;GO:0032482//Rab protein signal transduction;GO:0008104//protein localization;GO:0016482//cytosolic transport;GO:0051649//establishment of localization in cell;GO:0042886//amid…
LOC110698810	NA	GO:0003824//catalytic activity;
LOC110712491	K00108//choline dehydrogenase [EC:1.1.99.1]+ko01100//Metabolic pathways+ko00260//Glycine, serine and threonine metabolism;K07478//putative ATPase	NA
LOC110710071	K17604//zinc finger SWIM domain-containing protein 3	NA
LOC110740229	K01807//ribose 5-phosphate isomerase A [EC:5.3.1.6]+ko00030//Pentose phosphate pathway+ko01230//Biosynthesis of amino acids+ko01100//Metabolic pathways+ko01110//Biosynthesis of secondary metabolites+ko00710//Carbon fixation in photosynthetic organisms+ko01200//Carbon metabolism;K07478//putative ATPase;K02218//casein kinase 1 [EC:2.7.11.1];K14318//nuclear pore complex protein Nup88+ko03013//RNA tr…	NA
LOC110724871	K01772//protoporphyrin/coproporphyrin ferrochelatase [EC:4.99.1.1 4.99.1.9]+ko00860//Porphyrin and chlorophyll metabolism+ko01100//Metabolic pathways+ko01110//Biosynthesis of secondary metabolites;K00134//glyceraldehyde 3-phosphate dehydrogenase [EC:1.2.1.12]+ko00010//Glycolysis / Gluconeogenesis+ko01230//Biosynthesis of amino acids+ko01100//Metabolic pathways+ko01110//Biosynthesis of secondary m…	NA
LOC110693816	K16251//DNA-directed RNA polymerase V subunit 1 [EC:2.7.7.6]	NA
LOC110683103	K04460//serine/threonine-protein phosphatase 5 [EC:3.1.3.16];K15803//(-)-germacrene D synthase [EC:4.2.3.75]+ko00909//Sesquiterpenoid and triterpenoid biosynthesis	NA
LOC110729956	K18328//lariat debranching enzyme [EC:3.1.-.-];K07442//tRNA (adenine57-N1/adenine58-N1)-methyltransferase catalytic subunit [EC:2.1.1.219 2.1.1.220];K13342//peroxin-5+ko04146//Peroxisome;K18328//lariat debranching enzyme [EC:3.1.-.-];K07442//tRNA (adenine57-N1/adenine58-N1)-methyltransferase catalytic subunit [EC:2.1.1.219 2.1.1.220];K13342//peroxin-5+ko04146//Peroxisome;K18328//lariat debranchin…	NA
LOC110711713	K01365//cathepsin L [EC:3.4.22.15]+ko04145//Phagosome	GO:0016020//membrane;GO:0031224//intrinsic component of membrane;GO:0016021//integral component of membrane;GO:0110165//cellular anatomical entity;
LOC110691690	K10393//kinesin family member 2/24;K18195//rhamnogalacturonan endolyase [EC:4.2.2.23];K01867//tryptophanyl-tRNA synthetase [EC:6.1.1.2]+ko00970//Aminoacyl-tRNA biosynthesis;K11600//exosome complex component RRP41+ko03018//RNA degradation	NA
LOC110708236	K01913//acetate---CoA ligase [EC:6.2.1.1]+ko00010//Glycolysis / Gluconeogenesis+ko01100//Metabolic pathways+ko01110//Biosynthesis of secondary metabolites+ko00620//Pyruvate metabolism+ko01200//Carbon metabolism+ko00630//Glyoxylate and dicarboxylate metabolism;K01913//acetate---CoA ligase [EC:6.2.1.1]+ko00010//Glycolysis / Gluconeogenesis+ko01100//Metabolic pathways+ko01110//Biosynthesis of second…	GO:0003824//catalytic activity;
LOC110737453	K04733//interleukin-1 receptor-associated kinase 4 [EC:2.7.11.1];K18485//myogenic factor 6;K20558//transcription factor SPEECHLESS+ko04016//MAPK signaling pathway - plant;K13422//transcription factor MYC2+ko04016//MAPK signaling pathway - plant+ko04075//Plant hormone signal transduction	NA
LOC110738026	K11786//ATP-dependent helicase STH1/SNF2 [EC:3.6.4.-];K11786//ATP-dependent helicase STH1/SNF2 [EC:3.6.4.-];K11786//ATP-dependent helicase STH1/SNF2 [EC:3.6.4.-];K11786//ATP-dependent helicase STH1/SNF2 [EC:3.6.4.-];K11786//ATP-dependent helicase STH1/SNF2 [EC:3.6.4.-];K11786//ATP-dependent helicase STH1/SNF2 [EC:3.6.4.-];K11786//ATP-dependent helicase STH1/SNF2 [EC:3.6.4.-];K11786//ATP-dependent…	NA
LOC110688252	K05857//phosphatidylinositol phospholipase C, delta [EC:3.1.4.11]+ko01100//Metabolic pathways+ko04070//Phosphatidylinositol signaling system+ko00562//Inositol phosphate metabolism	GO:0023052//signaling;GO:0050896//response to stimulus;GO:0050789//regulation of biological process;GO:0016042//lipid catabolic process;GO:1901575//organic substance catabolic process;GO:0007165//signal transduction;GO:0009987//cellular process;GO:0044238//primary metabolic process;GO:0050794//regulation of cellular process;GO:0065007//biological regulation;GO:0007154//cell communication;GO:00355…
LOC110713591	K18195//rhamnogalacturonan endolyase [EC:4.2.2.23]	GO:0030246//carbohydrate binding;GO:0005488//binding;
LOC110694112	K00432//glutathione peroxidase [EC:1.11.1.9]+ko00590//Arachidonic acid metabolism+ko00480//Glutathione metabolism;K00432//glutathione peroxidase [EC:1.11.1.9]+ko00590//Arachidonic acid metabolism+ko00480//Glutathione metabolism	GO:0006950//response to stress;GO:0050896//response to stimulus;GO:0006979//response to oxidative stress;GO:0016491//oxidoreductase activity;GO:0016209//antioxidant activity;GO:0004601//peroxidase activity;GO:0003824//catalytic activity;GO:0004602//glutathione peroxidase activity;GO:0016684//oxidoreductase activity, acting on peroxide as acceptor;
LOC110695924	K03695//ATP-dependent Clp protease ATP-binding subunit ClpB	GO:0016021//integral component of membrane;GO:0016020//membrane;GO:0110165//cellular anatomical entity;GO:0031224//intrinsic component of membrane;
LOC110737269	K04733//interleukin-1 receptor-associated kinase 4 [EC:2.7.11.1];K12447//UDP-sugar pyrophosphorylase [EC:2.7.7.64]+ko00520//Amino sugar and nucleotide sugar metabolism+ko00040//Pentose and glucuronate interconversions+ko01100//Metabolic pathways+ko00052//Galactose metabolism+ko00053//Ascorbate and aldarate metabolism;K03260//translation initiation factor 4G+ko03013//RNA transport;K01881//prolyl-t…	NA
LOC110689109	K17604//zinc finger SWIM domain-containing protein 3	NA
LOC110690432	K10573//ubiquitin-conjugating enzyme E2 A [EC:2.3.2.23]+ko04120//Ubiquitin mediated proteolysis	GO:0044265//cellular macromolecule catabolic process;GO:0030163//protein catabolic process;GO:0046483//heterocycle metabolic process;GO:1901360//organic cyclic compound metabolic process;GO:0044267//cellular protein metabolic process;GO:0071840//cellular component organization or biogenesis;GO:0043170//macromolecule metabolic process;GO:0019538//protein metabolic process;GO:0006281//DNA repair;GO…
LOC110697162	K20888//xyloglucan galactosyltransferase MUR3 [EC:2.4.1.-]	GO:0044042//glucan metabolic process;GO:0043170//macromolecule metabolic process;GO:0043413//macromolecule glycosylation;GO:0044237//cellular metabolic process;GO:0009101//glycoprotein biosynthetic process;GO:0044238//primary metabolic process;GO:0071704//organic substance metabolic process;GO:0070589//cellular component macromolecule biosynthetic process;GO:1901135//carbohydrate derivative metab…
LOC110717376	K19828//mitochondrial GTPase 1;K19828//mitochondrial GTPase 1;K19828//mitochondrial GTPase 1;K19828//mitochondrial GTPase 1;K19828//mitochondrial GTPase 1	GO:0043167//ion binding;GO:0035639//purine ribonucleoside triphosphate binding;GO:0036094//small molecule binding;GO:0003824//catalytic activity;GO:0140096//catalytic activity, acting on a protein;GO:1901265//nucleoside phosphate binding;GO:0005524//ATP binding;GO:0030554//adenyl nucleotide binding;GO:0097159//organic cyclic compound binding;GO:0016301//kinase activity;GO:0016773//phosphotransfer…
LOC110729579	K19747//BAHD acyltransferase [EC:2.3.1.-];K05747//Wiskott-Aldrich syndrome protein+ko04144//Endocytosis	NA
LOC110684064	K19519//transforming growth factor-beta-induced protein;K10955//mucin-2	GO:0110165//cellular anatomical entity;GO:0031224//intrinsic component of membrane;GO:0016020//membrane;GO:0016021//integral component of membrane;
LOC110692747	K22377//E3 ubiquitin-protein ligase listerin [EC:2.3.2.27]	GO:0005634//nucleus;GO:0043227//membrane-bounded organelle;GO:0043226//organelle;GO:0043231//intracellular membrane-bounded organelle;GO:0110165//cellular anatomical entity;GO:0043229//intracellular organelle;GO:0005622//intracellular;
LOC110723676	K01681//aconitate hydratase [EC:4.2.1.3]+ko00020//Citrate cycle (TCA cycle)+ko01230//Biosynthesis of amino acids+ko01100//Metabolic pathways+ko01110//Biosynthesis of secondary metabolites+ko01210//2-Oxocarboxylic acid metabolism+ko01200//Carbon metabolism+ko00630//Glyoxylate and dicarboxylate metabolism;K04733//interleukin-1 receptor-associated kinase 4 [EC:2.7.11.1]	GO:0071840//cellular component organization or biogenesis;GO:0090158//endoplasmic reticulum membrane organization;GO:0010256//endomembrane system organization;GO:0051641//cellular localization;GO:0022406//membrane docking;GO:0140056//organelle localization by membrane tethering;GO:0006996//organelle organization;GO:0016043//cellular component organization;GO:0061024//membrane organization;GO:0009…
LOC110687775	K10949//ER lumen protein retaining receptor	GO:0008104//protein localization;GO:0070727//cellular macromolecule localization;GO:0035437//maintenance of protein localization in endoplasmic reticulum;GO:0051641//cellular localization;GO:0065008//regulation of biological quality;GO:0033365//protein localization to organelle;GO:0045185//maintenance of protein location;GO:0033036//macromolecule localization;GO:0070972//protein localization to e…
LOC110701284	K03165//DNA topoisomerase III [EC:5.99.1.2]+ko03440//Homologous recombination;K03165//DNA topoisomerase III [EC:5.99.1.2]+ko03440//Homologous recombination	GO:0006807//nitrogen compound metabolic process;GO:0034641//cellular nitrogen compound metabolic process;GO:0016043//cellular component organization;GO:0071103//DNA conformation change;GO:0046483//heterocycle metabolic process;GO:0071704//organic substance metabolic process;GO:0043170//macromolecule metabolic process;GO:0006725//cellular aromatic compound metabolic process;GO:0008152//metabolic p…
LOC110716640	K04733//interleukin-1 receptor-associated kinase 4 [EC:2.7.11.1];K04730//interleukin-1 receptor-associated kinase 1 [EC:2.7.11.1]	GO:0031224//intrinsic component of membrane;GO:0016020//membrane;GO:0110165//cellular anatomical entity;GO:0016021//integral component of membrane;GO:0000166//nucleotide binding;GO:0016773//phosphotransferase activity, alcohol group as acceptor;GO:0005524//ATP binding;GO:0003824//catalytic activity;GO:0097159//organic cyclic compound binding;GO:0005488//binding;GO:0016301//kinase activity;GO:0097…
LOC110702678	K04077//chaperonin GroEL+ko03018//RNA degradation	GO:0006457//protein folding;GO:0009987//cellular process;GO:0042026//protein refolding;GO:0043231//intracellular membrane-bounded organelle;GO:0043226//organelle;GO:0110165//cellular anatomical entity;GO:0009536//plastid;GO:0005737//cytoplasm;GO:0043227//membrane-bounded organelle;GO:0005622//intracellular;GO:0009507//chloroplast;GO:0043229//intracellular organelle;GO:0036094//small molecule bind…
LOC110716320	K22683//aspartyl protease family protein [EC:3.4.23.-];K22683//aspartyl protease family protein [EC:3.4.23.-]	NA
LOC110715822	K17046//protein DEK	NA
LOC110713386	K03006//DNA-directed RNA polymerase II subunit RPB1 [EC:2.7.7.6]+ko03020//RNA polymerase	NA
LOC110715006	K06911//uncharacterized protein;K00423//L-ascorbate oxidase [EC:1.10.3.3]+ko01100//Metabolic pathways+ko00053//Ascorbate and aldarate metabolism;K11843//ubiquitin carboxyl-terminal hydrolase 14 [EC:3.4.19.12];K04733//interleukin-1 receptor-associated kinase 4 [EC:2.7.11.1];K09419//heat shock transcription factor, other eukaryote;K06911//uncharacterized protein;K00423//L-ascorbate oxidase [EC:1.10…	GO:0065007//biological regulation;GO:0050789//regulation of biological process;GO:0042592//homeostatic process;GO:0019725//cellular homeostasis;GO:0009987//cellular process;GO:0050794//regulation of cellular process;GO:0045454//cell redox homeostasis;GO:0065008//regulation of biological quality;
LOC110725316	K12589//exosome complex component RRP42+ko03018//RNA degradation;K12589//exosome complex component RRP42+ko03018//RNA degradation;K12589//exosome complex component RRP42+ko03018//RNA degradation	NA
LOC110737104	K05275//pyridoxine 4-dehydrogenase [EC:1.1.1.65]+ko00750//Vitamin B6 metabolism+ko01100//Metabolic pathways;K17744//L-galactose dehydrogenase [EC:1.1.1.316]+ko01100//Metabolic pathways+ko00053//Ascorbate and aldarate metabolism+ko01110//Biosynthesis of secondary metabolites	NA
LOC110733359	NA	GO:0061458//reproductive system development;GO:0010154//fruit development;GO:0009793//embryo development ending in seed dormancy;GO:0048316//seed development;GO:0003006//developmental process involved in reproduction;GO:0009790//embryo development;GO:0000003//reproduction;GO:0032501//multicellular organismal process;GO:0007275//multicellular organism development;GO:0048731//system development;GO:…
LOC110734794	K15030//translation initiation factor 3 subunit M;K11649//SWI/SNF related-matrix-associated actin-dependent regulator of chromatin subfamily C;K21596//calmodulin-binding transcription activator	NA
LOC110710657	K21407//adipocyte plasma membrane-associated protein	NA
LOC110720845	K03134//transcription initiation factor TFIID subunit 10+ko03022//Basal transcription factors	GO:0071704//organic substance metabolic process;GO:1901362//organic cyclic compound biosynthetic process;GO:0044237//cellular metabolic process;GO:0009987//cellular process;GO:0032774//RNA biosynthetic process;GO:0010467//gene expression;GO:0006351//transcription, DNA-templated;GO:0019438//aromatic compound biosynthetic process;GO:0006139//nucleobase-containing compound metabolic process;GO:00068…
LOC110695660	NA	GO:0016020//membrane;GO:0110165//cellular anatomical entity;GO:0031224//intrinsic component of membrane;GO:0016021//integral component of membrane;GO:0005488//binding;GO:0043167//ion binding;GO:0016491//oxidoreductase activity;GO:0046872//metal ion binding;GO:0003824//catalytic activity;GO:0043169//cation binding;
LOC110737833	K00721//dolichol-phosphate mannosyltransferase [EC:2.4.1.83]+ko00510//N-Glycan biosynthesis+ko01100//Metabolic pathways	GO:0044260//cellular macromolecule metabolic process;GO:0034645//cellular macromolecule biosynthetic process;GO:1901137//carbohydrate derivative biosynthetic process;GO:0009058//biosynthetic process;GO:0044238//primary metabolic process;GO:0009100//glycoprotein metabolic process;GO:0009101//glycoprotein biosynthetic process;GO:1901564//organonitrogen compound metabolic process;GO:1901566//organon…
LOC110704244	K04507//calcyclin binding protein;K04507//calcyclin binding protein	GO:0005515//protein binding;GO:0008092//cytoskeletal protein binding;GO:0005488//binding;GO:0031625//ubiquitin protein ligase binding;GO:0044389//ubiquitin-like protein ligase binding;GO:0019899//enzyme binding;GO:0015631//tubulin binding;GO:0044548//S100 protein binding;
LOC110704406	K05658//ATP-binding cassette, subfamily B (MDR/TAP), member 1 [EC:7.6.2.2]+ko02010//ABC transporters	NA
LOC110702372	K04733//interleukin-1 receptor-associated kinase 4 [EC:2.7.11.1]	NA
LOC110731263	K03138//transcription initiation factor TFIIF subunit alpha+ko03022//Basal transcription factors	GO:0044249//cellular biosynthetic process;GO:0032784//regulation of DNA-templated transcription, elongation;GO:0046483//heterocycle metabolic process;GO:0031323//regulation of cellular metabolic process;GO:1902680//positive regulation of RNA biosynthetic process;GO:0019438//aromatic compound biosynthetic process;GO:0032774//RNA biosynthetic process;GO:0006807//nitrogen compound metabolic process;…
LOC110695237	K05310//ethanolaminephosphotransferase [EC:2.7.-.-]+ko00563//Glycosylphosphatidylinositol (GPI)-anchor biosynthesis;K05310//ethanolaminephosphotransferase [EC:2.7.-.-]+ko00563//Glycosylphosphatidylinositol (GPI)-anchor biosynthesis;K05310//ethanolaminephosphotransferase [EC:2.7.-.-]+ko00563//Glycosylphosphatidylinositol (GPI)-anchor biosynthesis;K05310//ethanolaminephosphotransferase [EC:2.7.-.-]…	GO:0019637//organophosphate metabolic process;GO:0046488//phosphatidylinositol metabolic process;GO:0044255//cellular lipid metabolic process;GO:0006661//phosphatidylinositol biosynthetic process;GO:0044260//cellular macromolecule metabolic process;GO:0006807//nitrogen compound metabolic process;GO:0006464//cellular protein modification process;GO:0019538//protein metabolic process;GO:0090407//or…
LOC110714744	K03247//translation initiation factor 3 subunit H+ko03013//RNA transport	GO:0006807//nitrogen compound metabolic process;GO:1901566//organonitrogen compound biosynthetic process;GO:0034622//cellular protein-containing complex assembly;GO:0022613//ribonucleoprotein complex biogenesis;GO:0071840//cellular component organization or biogenesis;GO:0008152//metabolic process;GO:0044271//cellular nitrogen compound biosynthetic process;GO:0065003//protein-containing complex a…
LOC110728591	K03189//urease accessory protein	NA
LOC110699015	K03781//catalase [EC:1.11.1.6]+ko04016//MAPK signaling pathway - plant+ko04146//Peroxisome+ko00380//Tryptophan metabolism+ko01110//Biosynthesis of secondary metabolites+ko01200//Carbon metabolism+ko00630//Glyoxylate and dicarboxylate metabolism	GO:0050896//response to stimulus;GO:0008152//metabolic process;GO:0044237//cellular metabolic process;GO:0009987//cellular process;GO:0006979//response to oxidative stress;GO:0006950//response to stress;GO:0042743//hydrogen peroxide metabolic process;GO:0042744//hydrogen peroxide catabolic process;GO:0072593//reactive oxygen species metabolic process;GO:0044248//cellular catabolic process;GO:0009…
LOC110729645	K11423//histone-lysine N-methyltransferase SETD2 [EC:2.1.1.43]+ko00310//Lysine degradation	NA
LOC110734871	K12639//cytochrome P450 family 724 subfamily B polypeptide 1 [EC:1.14.13.-]+ko00905//Brassinosteroid biosynthesis+ko01100//Metabolic pathways+ko01110//Biosynthesis of secondary metabolites;K10532//heparan-alpha-glucosaminide N-acetyltransferase [EC:2.3.1.78]+ko00531//Glycosaminoglycan degradation+ko01100//Metabolic pathways	NA
LOC110714160	K09761//16S rRNA (uracil1498-N3)-methyltransferase [EC:2.1.1.193];K04733//interleukin-1 receptor-associated kinase 4 [EC:2.7.11.1]	NA
LOC110706513	K01810//glucose-6-phosphate isomerase [EC:5.3.1.9]+ko00010//Glycolysis / Gluconeogenesis+ko00030//Pentose phosphate pathway+ko00520//Amino sugar and nucleotide sugar metabolism+ko01100//Metabolic pathways+ko00500//Starch and sucrose metabolism+ko01110//Biosynthesis of secondary metabolites+ko01200//Carbon metabolism	NA
LOC110733042	K01303//acylaminoacyl-peptidase [EC:3.4.19.1];K01278//dipeptidyl-peptidase 4 [EC:3.4.14.5];K01303//acylaminoacyl-peptidase [EC:3.4.19.1];K01278//dipeptidyl-peptidase 4 [EC:3.4.14.5]	GO:0003824//catalytic activity;GO:0008236//serine-type peptidase activity;GO:0008233//peptidase activity;GO:0140096//catalytic activity, acting on a protein;GO:0016787//hydrolase activity;GO:0017171//serine hydrolase activity;GO:0070011//peptidase activity, acting on L-amino acid peptides;GO:0016825//hydrolase activity, acting on acid phosphorus-nitrogen bonds;
LOC110736100	K11584//serine/threonine-protein phosphatase 2A regulatory subunit B'+ko03015//mRNA surveillance pathway;K13868//solute carrier family 7 (L-type amino acid transporter), member 9	GO:0016020//membrane;GO:0031224//intrinsic component of membrane;GO:0110165//cellular anatomical entity;GO:0016021//integral component of membrane;GO:0005215//transporter activity;GO:0022857//transmembrane transporter activity;
LOC110699463	K13944//LOB domain-containing protein 16	NA
LOC110713554	K22312//hydroxyjasmonate sulfotransferase [EC:2.8.2.39]	NA
BGI_novel_G003430	K05666//ATP-binding cassette, subfamily C (CFTR/MRP), member 2+ko02010//ABC transporters	GO:0110165//cellular anatomical entity;GO:0016021//integral component of membrane;GO:0016020//membrane;GO:0031224//intrinsic component of membrane;GO:0022804//active transmembrane transporter activity;GO:0035639//purine ribonucleoside triphosphate binding;GO:0003824//catalytic activity;GO:0030554//adenyl nucleotide binding;GO:0032559//adenyl ribonucleotide binding;GO:0017076//purine nucleotide bi…
LOC110690079	K09494//T-complex protein 1 subunit beta;K03327//multidrug resistance protein, MATE family;K10706//senataxin [EC:3.6.4.-];K17604//zinc finger SWIM domain-containing protein 3;K01601//ribulose-bisphosphate carboxylase large chain [EC:4.1.1.39]+ko01100//Metabolic pathways+ko00710//Carbon fixation in photosynthetic organisms+ko01200//Carbon metabolism+ko00630//Glyoxylate and dicarboxylate metabolism	NA
LOC110681713	K03327//multidrug resistance protein, MATE family	GO:0031224//intrinsic component of membrane;GO:0016021//integral component of membrane;GO:0016020//membrane;GO:0110165//cellular anatomical entity;GO:0015297//antiporter activity;GO:0022857//transmembrane transporter activity;GO:0005215//transporter activity;GO:0042910//xenobiotic transmembrane transporter activity;GO:0022804//active transmembrane transporter activity;GO:0015291//secondary active…
LOC110740307	K19041//E3 ubiquitin-protein ligase RNF38/44 [EC:2.3.2.27]	NA
LOC110701170	K20285//Rab9 effector protein with kelch motifs	NA
BGI_novel_G005284	K04485//DNA repair protein RadA/Sms	GO:0006974//cellular response to DNA damage stimulus;GO:0006259//DNA metabolic process;GO:0051716//cellular response to stimulus;GO:0050896//response to stimulus;GO:0044238//primary metabolic process;GO:0006139//nucleobase-containing compound metabolic process;GO:0034641//cellular nitrogen compound metabolic process;GO:0043170//macromolecule metabolic process;GO:0006950//response to stress;GO:000…
LOC110694454	K21867//potassium channel	GO:0031224//intrinsic component of membrane;GO:0016021//integral component of membrane;GO:0016020//membrane;GO:0110165//cellular anatomical entity;GO:0005215//transporter activity;GO:0015075//ion transmembrane transporter activity;GO:0005267//potassium channel activity;GO:0005244//voltage-gated ion channel activity;GO:0022857//transmembrane transporter activity;GO:0022843//voltage-gated cation ch…
LOC110703624	K04733//interleukin-1 receptor-associated kinase 4 [EC:2.7.11.1]	GO:1901265//nucleoside phosphate binding;GO:0016772//transferase activity, transferring phosphorus-containing groups;GO:0140096//catalytic activity, acting on a protein;GO:0030554//adenyl nucleotide binding;GO:0005524//ATP binding;GO:0016740//transferase activity;GO:0032555//purine ribonucleotide binding;GO:0032559//adenyl ribonucleotide binding;GO:0017076//purine nucleotide binding;GO:0097159//o…
LOC110723827	K08867//WNK lysine deficient protein kinase [EC:2.7.11.1];K01176//alpha-amylase [EC:3.2.1.1]+ko01100//Metabolic pathways+ko00500//Starch and sucrose metabolism;K17710//pentatricopeptide repeat domain-containing protein 1	NA
LOC110734372	K04392//Ras-related C3 botulinum toxin substrate 1+ko04145//Phagosome	NA
LOC110716795	K19476//vacuolar protein sorting-associated protein IST1+ko04144//Endocytosis;K19476//vacuolar protein sorting-associated protein IST1+ko04144//Endocytosis	GO:0071705//nitrogen compound transport;GO:0051179//localization;GO:0015833//peptide transport;GO:0051234//establishment of localization;GO:0045184//establishment of protein localization;GO:0071702//organic substance transport;GO:0015031//protein transport;GO:0006810//transport;GO:0008104//protein localization;GO:0033036//macromolecule localization;GO:0042886//amide transport;
LOC110721938	K00799//glutathione S-transferase [EC:2.5.1.18]+ko00480//Glutathione metabolism	NA
LOC110717493	K04420//mitogen-activated protein kinase kinase kinase 2 [EC:2.7.11.25];K04421//mitogen-activated protein kinase kinase kinase 3 [EC:2.7.11.25]	GO:0031399//regulation of protein modification process;GO:0009893//positive regulation of metabolic process;GO:0006796//phosphate-containing compound metabolic process;GO:0045937//positive regulation of phosphate metabolic process;GO:0008152//metabolic process;GO:0019220//regulation of phosphate metabolic process;GO:0051726//regulation of cell cycle;GO:0043085//positive regulation of catalytic ac…
LOC110719065	NA	GO:0016021//integral component of membrane;GO:0016020//membrane;GO:0031224//intrinsic component of membrane;GO:0110165//cellular anatomical entity;
LOC110701893	K19984//exocyst complex component 5;K21437//ankyrin repeat domain-containing protein 13;K04733//interleukin-1 receptor-associated kinase 4 [EC:2.7.11.1];K03283//heat shock 70kDa protein 1/2/6/8+ko03040//Spliceosome+ko04144//Endocytosis+ko04141//Protein processing in endoplasmic reticulum;K21437//ankyrin repeat domain-containing protein 13;K04733//interleukin-1 receptor-associated kinase 4 [EC:2.7…	GO:1901363//heterocyclic compound binding;GO:0003677//DNA binding;GO:0003676//nucleic acid binding;GO:0005488//binding;GO:0046983//protein dimerization activity;GO:0097159//organic cyclic compound binding;GO:0005515//protein binding;
LOC110684255	K15803//(-)-germacrene D synthase [EC:4.2.3.75]+ko00909//Sesquiterpenoid and triterpenoid biosynthesis	GO:0010333//terpene synthase activity;GO:0043167//ion binding;GO:0000287//magnesium ion binding;GO:0043169//cation binding;GO:0046872//metal ion binding;GO:0016838//carbon-oxygen lyase activity, acting on phosphates;GO:0016835//carbon-oxygen lyase activity;GO:0005488//binding;GO:0003824//catalytic activity;GO:0016829//lyase activity;
LOC110705525	K00924//kinase [EC:2.7.1.-]	NA
LOC110693057	K13229//2,4-dihydroxy-1,4-benzoxazin-3-one-glucoside dioxygenase [EC:1.14.11.59]+ko00402//Benzoxazinoid biosynthesis;K06892//feruloyl-CoA ortho-hydroxylase [EC:1.14.11.-]+ko01110//Biosynthesis of secondary metabolites+ko00940//Phenylpropanoid biosynthesis	GO:0043167//ion binding;GO:0005488//binding;GO:0046872//metal ion binding;GO:0043169//cation binding;GO:0003824//catalytic activity;GO:0016491//oxidoreductase activity;
BGI_novel_G004303	NA	GO:0030154//cell differentiation;GO:0045165//cell fate commitment;GO:0032502//developmental process;GO:0023052//signaling;GO:0048869//cellular developmental process;GO:0007267//cell-cell signaling;GO:0045168//cell-cell signaling involved in cell fate commitment;GO:0009987//cellular process;GO:0007154//cell communication;GO:0016021//integral component of membrane;GO:0031224//intrinsic component of…
LOC110702389	K01640//hydroxymethylglutaryl-CoA lyase [EC:4.1.3.4]+ko04146//Peroxisome+ko00280//Valine, leucine and isoleucine degradation+ko01100//Metabolic pathways+ko00650//Butanoate metabolism+ko00072//Synthesis and degradation of ketone bodies	GO:0031224//intrinsic component of membrane;GO:0016021//integral component of membrane;GO:0016020//membrane;GO:0110165//cellular anatomical entity;GO:0005488//binding;GO:0036094//small molecule binding;GO:0097159//organic cyclic compound binding;GO:0032553//ribonucleotide binding;GO:0005215//transporter activity;GO:0032555//purine ribonucleotide binding;GO:0022857//transmembrane transporter activ…
LOC110740043	K00134//glyceraldehyde 3-phosphate dehydrogenase [EC:1.2.1.12]+ko00010//Glycolysis / Gluconeogenesis+ko01230//Biosynthesis of amino acids+ko01100//Metabolic pathways+ko01110//Biosynthesis of secondary metabolites+ko00710//Carbon fixation in photosynthetic organisms+ko01200//Carbon metabolism;K12448//UDP-arabinose 4-epimerase [EC:5.1.3.5]+ko00520//Amino sugar and nucleotide sugar metabolism+ko0110…	NA
LOC110731706	K21952//CASK-interacting protein	NA
LOC110727201	K00670//N-alpha-acetyltransferase 30 [EC:2.3.1.256]	GO:0016407//acetyltransferase activity;GO:0008080//N-acetyltransferase activity;GO:0016740//transferase activity;GO:0016410//N-acyltransferase activity;GO:0016746//transferase activity, transferring acyl groups;GO:0016747//transferase activity, transferring acyl groups other than amino-acyl groups;GO:0003824//catalytic activity;
LOC110711369	K00799//glutathione S-transferase [EC:2.5.1.18]+ko00480//Glutathione metabolism	NA
LOC110722654	K14306//nuclear pore complex protein Nup62+ko03013//RNA transport	GO:0050793//regulation of developmental process;GO:0022603//regulation of anatomical structure morphogenesis;GO:0022604//regulation of cell morphogenesis;GO:0065008//regulation of biological quality;GO:0008360//regulation of cell shape;GO:0065007//biological regulation;GO:0009058//biosynthetic process;GO:0009987//cellular process;GO:0008152//metabolic process;GO:0050789//regulation of biological …
LOC110721858	K22378//E3 ubiquitin-protein ligase RNF181 [EC:2.3.2.27];K11982//E3 ubiquitin-protein ligase RNF115/126 [EC:2.3.2.27]	NA
LOC110700544	K13993//HSP20 family protein+ko04141//Protein processing in endoplasmic reticulum	NA
LOC110710221	K06630//14-3-3 protein epsilon	NA
LOC110708853	K22686//pro-apoptotic serine protease NMA111 [EC:3.4.21.-];K17545//serine/threonine-protein kinase ULK4 [EC:2.7.11.1];K15376//gephyrin [EC:2.10.1.1 2.7.7.75]+ko01100//Metabolic pathways+ko00790//Folate biosynthesis;K13420//LRR receptor-like serine/threonine-protein kinase FLS2 [EC:2.7.11.1]+ko04016//MAPK signaling pathway - plant+ko04626//Plant-pathogen interaction;K03283//heat shock 70kDa protei…	NA
LOC110720560	K19042//E3 ubiquitin-protein ligase BOI and related proteins [EC:2.3.2.27]	NA
LOC110699109	NA	GO:0016020//membrane;GO:0031224//intrinsic component of membrane;GO:0016021//integral component of membrane;GO:0110165//cellular anatomical entity;
LOC110716963	K13947//auxin efflux carrier family	GO:0009719//response to endogenous stimulus;GO:0009733//response to auxin;GO:0007165//signal transduction;GO:0032870//cellular response to hormone stimulus;GO:0009987//cellular process;GO:0023052//signaling;GO:0050896//response to stimulus;GO:0050789//regulation of biological process;GO:0010033//response to organic substance;GO:0071495//cellular response to endogenous stimulus;GO:0051716//cellula…
LOC110686213	K12670//oligosaccharyltransferase complex subunit beta+ko04141//Protein processing in endoplasmic reticulum+ko00510//N-Glycan biosynthesis+ko01100//Metabolic pathways;K12670//oligosaccharyltransferase complex subunit beta+ko04141//Protein processing in endoplasmic reticulum+ko00510//N-Glycan biosynthesis+ko01100//Metabolic pathways	NA
LOC110720037	K00799//glutathione S-transferase [EC:2.5.1.18]+ko00480//Glutathione metabolism	NA
LOC110705428	K01193//beta-fructofuranosidase [EC:3.2.1.26]+ko01100//Metabolic pathways+ko00052//Galactose metabolism+ko00500//Starch and sucrose metabolism;K01193//beta-fructofuranosidase [EC:3.2.1.26]+ko01100//Metabolic pathways+ko00052//Galactose metabolism+ko00500//Starch and sucrose metabolism	GO:0071704//organic substance metabolic process;GO:0008152//metabolic process;GO:0005975//carbohydrate metabolic process;GO:0044238//primary metabolic process;GO:0016787//hydrolase activity;GO:0003824//catalytic activity;GO:0016798//hydrolase activity, acting on glycosyl bonds;GO:0004553//hydrolase activity, hydrolyzing O-glycosyl compounds;
LOC110689657	K00679//phospholipid:diacylglycerol acyltransferase [EC:2.3.1.158]+ko01100//Metabolic pathways+ko00561//Glycerolipid metabolism;K10691//E3 ubiquitin-protein ligase UBR4 [EC:2.3.2.27];K14209//solute carrier family 36 (proton-coupled amino acid transporter);K01188//beta-glucosidase [EC:3.2.1.21]+ko01100//Metabolic pathways+ko00500//Starch and sucrose metabolism+ko01110//Biosynthesis of secondary me…	GO:0003824//catalytic activity;GO:0016787//hydrolase activity;GO:0016788//hydrolase activity, acting on ester bonds;
LOC110685787	K14494//DELLA protein+ko04075//Plant hormone signal transduction	NA
LOC110703440	K00847//fructokinase [EC:2.7.1.4]+ko00520//Amino sugar and nucleotide sugar metabolism+ko01100//Metabolic pathways+ko00051//Fructose and mannose metabolism+ko00500//Starch and sucrose metabolism	GO:0016773//phosphotransferase activity, alcohol group as acceptor;GO:0016740//transferase activity;GO:0016772//transferase activity, transferring phosphorus-containing groups;GO:0003824//catalytic activity;GO:0016301//kinase activity;
LOC110725482	K00083//cinnamyl-alcohol dehydrogenase [EC:1.1.1.195]+ko01100//Metabolic pathways+ko01110//Biosynthesis of secondary metabolites+ko00940//Phenylpropanoid biosynthesis	NA
LOC110728767	K12355//coniferyl-aldehyde dehydrogenase [EC:1.2.1.68]+ko00940//Phenylpropanoid biosynthesis	NA
LOC110711784	K10405//kinesin family member C1;K20478//golgin subfamily B member 1;K20478//golgin subfamily B member 1;K10405//kinesin family member C1	NA
LOC110721865	NA	GO:1903046//meiotic cell cycle process;GO:0007051//spindle organization;GO:0016043//cellular component organization;GO:0006725//cellular aromatic compound metabolic process;GO:0008152//metabolic process;GO:0042138//meiotic DNA double-strand break formation;GO:0007017//microtubule-based process;GO:0061982//meiosis I cell cycle process;GO:0006996//organelle organization;GO:0006807//nitrogen compoun…
LOC110687383	K00799//glutathione S-transferase [EC:2.5.1.18]+ko00480//Glutathione metabolism;K00799//glutathione S-transferase [EC:2.5.1.18]+ko00480//Glutathione metabolism	GO:0051179//localization;GO:0051234//establishment of localization;GO:0006810//transport;GO:0009987//cellular process;GO:0016192//vesicle-mediated transport;GO:0031224//intrinsic component of membrane;GO:0110165//cellular anatomical entity;GO:0016020//membrane;GO:0016021//integral component of membrane;
LOC110702568	K20456//oxysterol-binding protein 1	GO:0055072//iron ion homeostasis;GO:0055076//transition metal ion homeostasis;GO:0048878//chemical homeostasis;GO:0033554//cellular response to stress;GO:0042592//homeostatic process;GO:0009725//response to hormone;GO:0055065//metal ion homeostasis;GO:0009991//response to extracellular stimulus;GO:0097305//response to alcohol;GO:0065007//biological regulation;GO:0030003//cellular cation homeostas…
LOC110696125	K01278//dipeptidyl-peptidase 4 [EC:3.4.14.5];K01278//dipeptidyl-peptidase 4 [EC:3.4.14.5]	GO:0017171//serine hydrolase activity;GO:0070011//peptidase activity, acting on L-amino acid peptides;GO:0016825//hydrolase activity, acting on acid phosphorus-nitrogen bonds;GO:0003824//catalytic activity;GO:0008236//serine-type peptidase activity;GO:0008233//peptidase activity;GO:0016787//hydrolase activity;GO:0140096//catalytic activity, acting on a protein;
LOC110734839	K01303//acylaminoacyl-peptidase [EC:3.4.19.1];K09494//T-complex protein 1 subunit beta;K08176//MFS transporter, PHS family, inorganic phosphate transporter	NA
LOC110697117	K03234//elongation factor 2;K00030//isocitrate dehydrogenase (NAD+) [EC:1.1.1.41]+ko00020//Citrate cycle (TCA cycle)+ko01230//Biosynthesis of amino acids+ko01100//Metabolic pathways+ko01110//Biosynthesis of secondary metabolites+ko01210//2-Oxocarboxylic acid metabolism+ko01200//Carbon metabolism	GO:0006643//membrane lipid metabolic process;GO:0019538//protein metabolic process;GO:1901566//organonitrogen compound biosynthetic process;GO:1903509//liposaccharide metabolic process;GO:0006793//phosphorus metabolic process;GO:0046474//glycerophospholipid biosynthetic process;GO:0006661//phosphatidylinositol biosynthetic process;GO:1901137//carbohydrate derivative biosynthetic process;GO:000666…
LOC110710824	K00799//glutathione S-transferase [EC:2.5.1.18]+ko00480//Glutathione metabolism;K15190//7SK snRNA methylphosphate capping enzyme [EC:2.1.1.-];K12402//AP-4 complex subunit mu-1;K03283//heat shock 70kDa protein 1/2/6/8+ko03040//Spliceosome+ko04144//Endocytosis+ko04141//Protein processing in endoplasmic reticulum	NA
LOC110695244	K16075//magnesium transporter	GO:0006810//transport;GO:0051179//localization;GO:0051234//establishment of localization;GO:0006811//ion transport;GO:0110165//cellular anatomical entity;GO:0031224//intrinsic component of membrane;GO:0016020//membrane;GO:0016021//integral component of membrane;
LOC110701401	K22911//thiamine phosphate phosphatase / amino-HMP aminohydrolase [EC:3.1.3.100 3.5.99.-]+ko01100//Metabolic pathways+ko00730//Thiamine metabolism;K22911//thiamine phosphate phosphatase / amino-HMP aminohydrolase [EC:3.1.3.100 3.5.99.-]+ko01100//Metabolic pathways+ko00730//Thiamine metabolism	NA
LOC110737829	K02875//large subunit ribosomal protein L14e+ko03010//Ribosome	NA
LOC110695142	K02864//large subunit ribosomal protein L10+ko03010//Ribosome	GO:0042254//ribosome biogenesis;GO:0022613//ribonucleoprotein complex biogenesis;GO:0044085//cellular component biogenesis;GO:0071840//cellular component organization or biogenesis;GO:0009987//cellular process;
LOC110706648	K10664//E3 ubiquitin-protein ligase ATL6/9/15/31/42/55 [EC:2.3.2.27]	NA
BGI_novel_G004136	K00432//glutathione peroxidase [EC:1.11.1.9]+ko00590//Arachidonic acid metabolism+ko00480//Glutathione metabolism	GO:0046686//response to cadmium ion;GO:0042221//response to chemical;GO:0006950//response to stress;GO:0010035//response to inorganic substance;GO:0006979//response to oxidative stress;GO:0050896//response to stimulus;GO:0010038//response to metal ion;GO:0005886//plasma membrane;GO:0005737//cytoplasm;GO:0016020//membrane;GO:0009507//chloroplast;GO:0043231//intracellular membrane-bounded organelle…
LOC110733949	K09753//cinnamoyl-CoA reductase [EC:1.2.1.44]+ko01100//Metabolic pathways+ko01110//Biosynthesis of secondary metabolites+ko00940//Phenylpropanoid biosynthesis;K11982//E3 ubiquitin-protein ligase RNF115/126 [EC:2.3.2.27];K20279//synaptojanin [EC:3.1.3.36]+ko01100//Metabolic pathways+ko04070//Phosphatidylinositol signaling system+ko00562//Inositol phosphate metabolism;K15176//RNA polymerase-associa…	NA
LOC110719276	K07437//cytochrome P450 family 26 subfamily A+ko01100//Metabolic pathways	GO:0055114//oxidation-reduction process;GO:0042446//hormone biosynthetic process;GO:0010817//regulation of hormone levels;GO:1901617//organic hydroxy compound biosynthetic process;GO:0007275//multicellular organism development;GO:0016129//phytosteroid biosynthetic process;GO:0071704//organic substance metabolic process;GO:0042592//homeostatic process;GO:1901362//organic cyclic compound biosynthet…
LOC110726713	NA	GO:0110165//cellular anatomical entity;GO:0005634//nucleus;GO:0043229//intracellular organelle;GO:0005622//intracellular;GO:0043226//organelle;GO:0043227//membrane-bounded organelle;GO:0043231//intracellular membrane-bounded organelle;GO:0043169//cation binding;GO:0097159//organic cyclic compound binding;GO:0003676//nucleic acid binding;GO:0046872//metal ion binding;GO:0003677//DNA binding;GO:190…
LOC110708586	K10396//kinesin family member 5+ko04144//Endocytosis;K01206//alpha-L-fucosidase [EC:3.2.1.51]+ko00511//Other glycan degradation	GO:0016788//hydrolase activity, acting on ester bonds;GO:0003824//catalytic activity;GO:0016787//hydrolase activity;
LOC110736983	K15188//cyclin T;K15188//cyclin T	GO:0010556//regulation of macromolecule biosynthetic process;GO:0031323//regulation of cellular metabolic process;GO:0019219//regulation of nucleobase-containing compound metabolic process;GO:0006357//regulation of transcription by RNA polymerase II;GO:0006355//regulation of transcription, DNA-templated;GO:0051252//regulation of RNA metabolic process;GO:0050794//regulation of cellular process;GO:…
LOC110695296	K13993//HSP20 family protein+ko04141//Protein processing in endoplasmic reticulum;K13993//HSP20 family protein+ko04141//Protein processing in endoplasmic reticulum;K13993//HSP20 family protein+ko04141//Protein processing in endoplasmic reticulum	NA
LOC110697537	K11446//histone demethylase JARID1 [EC:1.14.11.-];K02178//checkpoint serine/threonine-protein kinase [EC:2.7.11.1];K13336//peroxin-3+ko04146//Peroxisome;K21844//protein FAM126;K09338//homeobox-leucine zipper protein	NA
LOC110722768	K07019//uncharacterized protein	NA
LOC110727915	K15141//mediator of RNA polymerase II transcription subunit 28	GO:0010556//regulation of macromolecule biosynthetic process;GO:2000112//regulation of cellular macromolecule biosynthetic process;GO:0080090//regulation of primary metabolic process;GO:0010468//regulation of gene expression;GO:0051171//regulation of nitrogen compound metabolic process;GO:0060255//regulation of macromolecule metabolic process;GO:0050794//regulation of cellular process;GO:2001141/…
LOC110716734	K10528//hydroperoxide lyase [EC:4.1.2.-]+ko00592//alpha-Linolenic acid metabolism+ko01110//Biosynthesis of secondary metabolites	GO:0043167//ion binding;GO:0043169//cation binding;GO:0046914//transition metal ion binding;GO:0005506//iron ion binding;GO:0016491//oxidoreductase activity;GO:0004497//monooxygenase activity;GO:0005488//binding;GO:0016829//lyase activity;GO:0046872//metal ion binding;GO:0016705//oxidoreductase activity, acting on paired donors, with incorporation or reduction of molecular oxygen;GO:0046906//tetr…
LOC110725687	NA	GO:0071704//organic substance metabolic process;GO:0008152//metabolic process;GO:0043170//macromolecule metabolic process;GO:0006302//double-strand break repair;GO:0000725//recombinational repair;GO:0044237//cellular metabolic process;GO:0033554//cellular response to stress;GO:0006725//cellular aromatic compound metabolic process;GO:0006974//cellular response to DNA damage stimulus;GO:0006950//re…
LOC110718587	K08832//serine/threonine-protein kinase SRPK3 [EC:2.7.11.1];K11724//bromodomain testis-specific protein;K11684//bromodomain-containing factor 1;K11721//bromodomain-containing protein 3	NA
LOC110682930	K08176//MFS transporter, PHS family, inorganic phosphate transporter;K01303//acylaminoacyl-peptidase [EC:3.4.19.1];K19861//benzyl alcohol O-benzoyltransferase [EC:2.3.1.196 2.3.1.232];K09494//T-complex protein 1 subunit beta	NA
LOC110733450	K23048//RING finger protein unkempt	GO:0046872//metal ion binding;GO:0005488//binding;GO:0043167//ion binding;GO:0043169//cation binding;
LOC110702410	K02218//casein kinase 1 [EC:2.7.11.1]	NA
LOC110702118	K04733//interleukin-1 receptor-associated kinase 4 [EC:2.7.11.1]	NA
LOC110727760	K13449//pathogenesis-related protein 1+ko04016//MAPK signaling pathway - plant+ko04626//Plant-pathogen interaction+ko04075//Plant hormone signal transduction	NA
LOC110738069	K01303//acylaminoacyl-peptidase [EC:3.4.19.1];K00799//glutathione S-transferase [EC:2.5.1.18]+ko00480//Glutathione metabolism;K08176//MFS transporter, PHS family, inorganic phosphate transporter;K02704//photosystem II CP47 chlorophyll apoprotein+ko01100//Metabolic pathways+ko00195//Photosynthesis	NA
LOC110696488	K09422//transcription factor MYB, plant	GO:0043227//membrane-bounded organelle;GO:0005634//nucleus;GO:0043229//intracellular organelle;GO:0110165//cellular anatomical entity;GO:0005622//intracellular;GO:0043226//organelle;GO:0043231//intracellular membrane-bounded organelle;GO:0003677//DNA binding;GO:1901363//heterocyclic compound binding;GO:0097159//organic cyclic compound binding;GO:0003676//nucleic acid binding;GO:0005488//binding;
LOC110683223	K05929//phosphoethanolamine N-methyltransferase [EC:2.1.1.103]+ko00564//Glycerophospholipid metabolism	GO:0044255//cellular lipid metabolic process;GO:0006793//phosphorus metabolic process;GO:0009058//biosynthetic process;GO:0046470//phosphatidylcholine metabolic process;GO:0006807//nitrogen compound metabolic process;GO:0044237//cellular metabolic process;GO:0046486//glycerolipid metabolic process;GO:0032259//methylation;GO:0046474//glycerophospholipid biosynthetic process;GO:0009987//cellular pr…
LOC110694074	K11380//NuA3 HAT complex component NTO1	GO:0046872//metal ion binding;GO:0043167//ion binding;GO:0005488//binding;GO:0043169//cation binding;
LOC110730379	K14948//polypyrimidine tract-binding protein 2	GO:0003676//nucleic acid binding;GO:0097159//organic cyclic compound binding;GO:0005488//binding;GO:0003723//RNA binding;GO:1901363//heterocyclic compound binding;
LOC110739106	K00679//phospholipid:diacylglycerol acyltransferase [EC:2.3.1.158]+ko01100//Metabolic pathways+ko00561//Glycerolipid metabolism;K10691//E3 ubiquitin-protein ligase UBR4 [EC:2.3.2.27];K01188//beta-glucosidase [EC:3.2.1.21]+ko01100//Metabolic pathways+ko00500//Starch and sucrose metabolism+ko01110//Biosynthesis of secondary metabolites+ko00460//Cyanoamino acid metabolism+ko00940//Phenylpropanoid bi…	GO:0044238//primary metabolic process;GO:0008152//metabolic process;GO:0006629//lipid metabolic process;GO:0071704//organic substance metabolic process;GO:0003824//catalytic activity;GO:0016787//hydrolase activity;GO:0016298//lipase activity;GO:0016788//hydrolase activity, acting on ester bonds;
LOC110727922	K08726//soluble epoxide hydrolase / lipid-phosphate phosphatase [EC:3.3.2.10 3.1.3.76]+ko04146//Peroxisome+ko00590//Arachidonic acid metabolism+ko01100//Metabolic pathways;K22369//epoxide hydrolase 4 [EC:3.3.-.-]	GO:0110165//cellular anatomical entity;GO:0043227//membrane-bounded organelle;GO:0043231//intracellular membrane-bounded organelle;GO:0005777//peroxisome;GO:0005737//cytoplasm;GO:0042579//microbody;GO:0043226//organelle;GO:0005622//intracellular;GO:0043229//intracellular organelle;GO:0003824//catalytic activity;
LOC110735709	NA	GO:0016021//integral component of membrane;GO:0016020//membrane;GO:0031224//intrinsic component of membrane;GO:0110165//cellular anatomical entity;
LOC110734205	K22048//mechanosensitive ion channel protein 4/5/6/7/8/9/10;K22048//mechanosensitive ion channel protein 4/5/6/7/8/9/10	GO:0009987//cellular process;GO:0055085//transmembrane transport;GO:0051234//establishment of localization;GO:0006810//transport;GO:0051179//localization;GO:0031224//intrinsic component of membrane;GO:0110165//cellular anatomical entity;GO:0016020//membrane;GO:0016021//integral component of membrane;
LOC110684896	K09874//aquaporin NIP;K17604//zinc finger SWIM domain-containing protein 3;K17086//transmembrane 9 superfamily member 2/4	NA
LOC110736703	K00430//peroxidase [EC:1.11.1.7]+ko01100//Metabolic pathways+ko01110//Biosynthesis of secondary metabolites+ko00940//Phenylpropanoid biosynthesis	GO:0006950//response to stress;GO:0009056//catabolic process;GO:0044248//cellular catabolic process;GO:0009987//cellular process;GO:0050896//response to stimulus;GO:0008152//metabolic process;GO:0042744//hydrogen peroxide catabolic process;GO:0044237//cellular metabolic process;GO:0006979//response to oxidative stress;GO:0042743//hydrogen peroxide metabolic process;GO:0072593//reactive oxygen spe…
LOC110735039	K02727//20S proteasome subunit alpha 7 [EC:3.4.25.1]+ko03050//Proteasome	GO:0043170//macromolecule metabolic process;GO:0009987//cellular process;GO:0071704//organic substance metabolic process;GO:1901565//organonitrogen compound catabolic process;GO:1901564//organonitrogen compound metabolic process;GO:0006511//ubiquitin-dependent protein catabolic process;GO:0019538//protein metabolic process;GO:0008152//metabolic process;GO:0044257//cellular protein catabolic proce…
LOC110723290	K22069//LYR motif-containing protein 4	NA
LOC110717563	K22503//aspartyl-tRNA synthetase [EC:6.1.1.12]+ko00970//Aminoacyl-tRNA biosynthesis;K05019//chloride channel, nucleotide-sensitive, 1A+ko03013//RNA transport;K20290//conserved oligomeric Golgi complex subunit 3	NA
LOC110712540	K01206//alpha-L-fucosidase [EC:3.2.1.51]+ko00511//Other glycan degradation	GO:0016788//hydrolase activity, acting on ester bonds;GO:0016787//hydrolase activity;GO:0003824//catalytic activity;
LOC110713983	K20178//vacuolar protein sorting-associated protein 8	GO:0006886//intracellular protein transport;GO:0015031//protein transport;GO:0046907//intracellular transport;GO:0070727//cellular macromolecule localization;GO:0008104//protein localization;GO:0016192//vesicle-mediated transport;GO:0071702//organic substance transport;GO:0051649//establishment of localization in cell;GO:0009987//cellular process;GO:0042886//amide transport;GO:0045184//establishm…
LOC110686134	K01188//beta-glucosidase [EC:3.2.1.21]+ko01100//Metabolic pathways+ko00500//Starch and sucrose metabolism+ko01110//Biosynthesis of secondary metabolites+ko00460//Cyanoamino acid metabolism+ko00940//Phenylpropanoid biosynthesis;K01188//beta-glucosidase [EC:3.2.1.21]+ko01100//Metabolic pathways+ko00500//Starch and sucrose metabolism+ko01110//Biosynthesis of secondary metabolites+ko00460//Cyanoamino…	GO:0008152//metabolic process;GO:0044238//primary metabolic process;GO:0005975//carbohydrate metabolic process;GO:0071704//organic substance metabolic process;GO:0008422//beta-glucosidase activity;GO:0015926//glucosidase activity;GO:0016798//hydrolase activity, acting on glycosyl bonds;GO:0004553//hydrolase activity, hydrolyzing O-glycosyl compounds;GO:0003824//catalytic activity;GO:0016787//hydr…
LOC110692306	K20044//phosphatidylinositol-binding clathrin assembly protein	GO:0034622//cellular protein-containing complex assembly;GO:0016043//cellular component organization;GO:0048268//clathrin coat assembly;GO:0071840//cellular component organization or biogenesis;GO:0009987//cellular process;GO:0044085//cellular component biogenesis;GO:0022607//cellular component assembly;GO:0043933//protein-containing complex subunit organization;GO:0065003//protein-containing com…
BGI_novel_G004467	K21362//galactolipid galactosyltransferase [EC:2.4.1.184]+ko00561//Glycerolipid metabolism	GO:0044238//primary metabolic process;GO:0071704//organic substance metabolic process;GO:0005975//carbohydrate metabolic process;GO:0008152//metabolic process;GO:0110165//cellular anatomical entity;GO:0016021//integral component of membrane;GO:0016020//membrane;GO:0031224//intrinsic component of membrane;GO:0016798//hydrolase activity, acting on glycosyl bonds;GO:0016787//hydrolase activity;GO:00…
LOC110707706	K14490//histidine-containing phosphotransfer peotein+ko04075//Plant hormone signal transduction;K14490//histidine-containing phosphotransfer peotein+ko04075//Plant hormone signal transduction	NA
LOC110737856	K00858//NAD+ kinase [EC:2.7.1.23]+ko01100//Metabolic pathways+ko00760//Nicotinate and nicotinamide metabolism	NA
LOC110685147	K15255//ATP-dependent DNA helicase PIF1 [EC:3.6.4.12];K07466//replication factor A1+ko03420//Nucleotide excision repair+ko03030//DNA replication+ko03440//Homologous recombination+ko03430//Mismatch repair	NA
LOC110702644	K00799//glutathione S-transferase [EC:2.5.1.18]+ko00480//Glutathione metabolism	NA
LOC110737172	K04733//interleukin-1 receptor-associated kinase 4 [EC:2.7.11.1]	GO:0016020//membrane;GO:0110165//cellular anatomical entity;GO:0031224//intrinsic component of membrane;GO:0016021//integral component of membrane;GO:0140096//catalytic activity, acting on a protein;GO:0004672//protein kinase activity;GO:1901265//nucleoside phosphate binding;GO:0016740//transferase activity;GO:0016773//phosphotransferase activity, alcohol group as acceptor;GO:0043168//anion bindi…
LOC110689686	K22138//mitochondrial pyruvate carrier 1	GO:0006811//ion transport;GO:0051234//establishment of localization;GO:0006850//mitochondrial pyruvate transmembrane transport;GO:1905039//carboxylic acid transmembrane transport;GO:0006848//pyruvate transport;GO:0006820//anion transport;GO:0015718//monocarboxylic acid transport;GO:0098656//anion transmembrane transport;GO:0046942//carboxylic acid transport;GO:1990542//mitochondrial transmembrane…
LOC110694114	K19041//E3 ubiquitin-protein ligase RNF38/44 [EC:2.3.2.27]	GO:0031224//intrinsic component of membrane;GO:0016021//integral component of membrane;GO:0016020//membrane;GO:0110165//cellular anatomical entity;
LOC110696847	K04733//interleukin-1 receptor-associated kinase 4 [EC:2.7.11.1]	NA
LOC110697530	K22503//aspartyl-tRNA synthetase [EC:6.1.1.12]+ko00970//Aminoacyl-tRNA biosynthesis;K21919//BTB/POZ domain-containing protein KCTD9;K02575//MFS transporter, NNP family, nitrate/nitrite transporter+ko00910//Nitrogen metabolism;K20290//conserved oligomeric Golgi complex subunit 3	NA
LOC110682522	K03595//GTPase	NA
BGI_novel_G003937	K20283//golgin subfamily A member 4	NA
LOC110725793	K01176//alpha-amylase [EC:3.2.1.1]+ko01100//Metabolic pathways+ko00500//Starch and sucrose metabolism;K01176//alpha-amylase [EC:3.2.1.1]+ko01100//Metabolic pathways+ko00500//Starch and sucrose metabolism	GO:0004185//serine-type carboxypeptidase activity;GO:0008238//exopeptidase activity;GO:0003824//catalytic activity;GO:0070011//peptidase activity, acting on L-amino acid peptides;GO:0004180//carboxypeptidase activity;GO:0016787//hydrolase activity;GO:0008233//peptidase activity;GO:0140096//catalytic activity, acting on a protein;GO:0017171//serine hydrolase activity;GO:0008236//serine-type peptid…
LOC110701687	K02870//large subunit ribosomal protein L12e+ko03010//Ribosome	GO:0006807//nitrogen compound metabolic process;GO:0008152//metabolic process;GO:0034645//cellular macromolecule biosynthetic process;GO:0019538//protein metabolic process;GO:0043043//peptide biosynthetic process;GO:0043603//cellular amide metabolic process;GO:0044267//cellular protein metabolic process;GO:0010467//gene expression;GO:0071704//organic substance metabolic process;GO:0006518//peptid…
BGI_novel_G000387	K18195//rhamnogalacturonan endolyase [EC:4.2.2.23];K00815//tyrosine aminotransferase [EC:2.6.1.5]+ko00130//Ubiquinone and other terpenoid-quinone biosynthesis+ko01230//Biosynthesis of amino acids+ko00960//Tropane, piperidine and pyridine alkaloid biosynthesis+ko00350//Tyrosine metabolism+ko01100//Metabolic pathways+ko00950//Isoquinoline alkaloid biosynthesis+ko01110//Biosynthesis of secondary met…	NA
LOC110700463	K00966//mannose-1-phosphate guanylyltransferase [EC:2.7.7.13]+ko00520//Amino sugar and nucleotide sugar metabolism+ko01100//Metabolic pathways+ko00051//Fructose and mannose metabolism+ko01110//Biosynthesis of secondary metabolites	GO:0008152//metabolic process;GO:0009058//biosynthetic process;GO:0016779//nucleotidyltransferase activity;GO:0016772//transferase activity, transferring phosphorus-containing groups;GO:0003824//catalytic activity;GO:0016740//transferase activity;
LOC110691714	K17545//serine/threonine-protein kinase ULK4 [EC:2.7.11.1];K13436//pto-interacting protein 1 [EC:2.7.11.1]+ko04626//Plant-pathogen interaction;K09874//aquaporin NIP	NA
LOC110708781	K17964//leucine-rich PPR motif-containing protein, mitochondrial;K17964//leucine-rich PPR motif-containing protein, mitochondrial;K17964//leucine-rich PPR motif-containing protein, mitochondrial	NA
LOC110731053	K22503//aspartyl-tRNA synthetase [EC:6.1.1.12]+ko00970//Aminoacyl-tRNA biosynthesis;K05019//chloride channel, nucleotide-sensitive, 1A+ko03013//RNA transport;K20290//conserved oligomeric Golgi complex subunit 3	NA
LOC110709156	K18195//rhamnogalacturonan endolyase [EC:4.2.2.23];K10393//kinesin family member 2/24;K18195//rhamnogalacturonan endolyase [EC:4.2.2.23];K10393//kinesin family member 2/24	NA
LOC110719242	K08857//NIMA (never in mitosis gene a)-related kinase 1/4/5 [EC:2.7.11.1];K22696//protein-lysine N-methyltransferase EEF2KMT [EC:2.1.1.-];K20241//WD repeat-containing protein 44	NA
LOC110736812	K13176//THO complex subunit 7+ko03013//RNA transport;K13176//THO complex subunit 7+ko03013//RNA transport;K13176//THO complex subunit 7+ko03013//RNA transport;K13176//THO complex subunit 7+ko03013//RNA transport	GO:0046483//heterocycle metabolic process;GO:0008152//metabolic process;GO:0034641//cellular nitrogen compound metabolic process;GO:0006807//nitrogen compound metabolic process;GO:0006397//mRNA processing;GO:0006139//nucleobase-containing compound metabolic process;GO:0071704//organic substance metabolic process;GO:0044237//cellular metabolic process;GO:0043170//macromolecule metabolic process;GO…
LOC110735653	K11168//dehydrogenase/reductase SDR family member 12 [EC:1.1.-.-];K11168//dehydrogenase/reductase SDR family member 12 [EC:1.1.-.-]	GO:0009237//siderophore metabolic process;GO:0006518//peptide metabolic process;GO:0019290//siderophore biosynthetic process;GO:0044249//cellular biosynthetic process;GO:0006807//nitrogen compound metabolic process;GO:0008152//metabolic process;GO:0043603//cellular amide metabolic process;GO:1901576//organic substance biosynthetic process;GO:0019748//secondary metabolic process;GO:1901564//organo…
LOC110729796	K09578//peptidyl-prolyl cis-trans isomerase NIMA-interacting 1 [EC:5.2.1.8]	GO:0003824//catalytic activity;GO:0016859//cis-trans isomerase activity;GO:0140096//catalytic activity, acting on a protein;GO:0003755//peptidyl-prolyl cis-trans isomerase activity;GO:0016853//isomerase activity;
LOC110689425	K09647//mitochondrial inner membrane protease subunit 1 [EC:3.4.21.-]+ko03060//Protein export;K09648//mitochondrial inner membrane protease subunit 2 [EC:3.4.21.-]+ko03060//Protein export;K09647//mitochondrial inner membrane protease subunit 1 [EC:3.4.21.-]+ko03060//Protein export;K09648//mitochondrial inner membrane protease subunit 2 [EC:3.4.21.-]+ko03060//Protein export;K09647//mitochondrial i…	NA
LOC110713442	K02989//small subunit ribosomal protein S5e+ko03010//Ribosome	GO:0044271//cellular nitrogen compound biosynthetic process;GO:0044238//primary metabolic process;GO:0043170//macromolecule metabolic process;GO:0043603//cellular amide metabolic process;GO:0019538//protein metabolic process;GO:0009987//cellular process;GO:0044237//cellular metabolic process;GO:0006807//nitrogen compound metabolic process;GO:0044267//cellular protein metabolic process;GO:0009059/…
LOC110712570	K09497//T-complex protein 1 subunit epsilon;K09497//T-complex protein 1 subunit epsilon	GO:0006457//protein folding;GO:0009987//cellular process;GO:0005737//cytoplasm;GO:0005622//intracellular;GO:0110165//cellular anatomical entity;GO:0030554//adenyl nucleotide binding;GO:0043167//ion binding;GO:0017076//purine nucleotide binding;GO:0097159//organic cyclic compound binding;GO:0043168//anion binding;GO:0051082//unfolded protein binding;GO:0005515//protein binding;GO:0097367//carbohyd…
LOC110722598	NA	GO:0016020//membrane;GO:0110165//cellular anatomical entity;GO:0016021//integral component of membrane;GO:0031224//intrinsic component of membrane;
LOC110706939	K23012//peroxisomal leader peptide-processing protease [EC:3.4.21.-]	GO:0044238//primary metabolic process;GO:0019538//protein metabolic process;GO:0043170//macromolecule metabolic process;GO:0010467//gene expression;GO:0008152//metabolic process;GO:0016485//protein processing;GO:0006807//nitrogen compound metabolic process;GO:0051604//protein maturation;GO:1901564//organonitrogen compound metabolic process;GO:0071704//organic substance metabolic process;GO:000650…
LOC110716624	NA	GO:0010876//lipid localization;GO:0051179//localization;GO:0071702//organic substance transport;GO:0033036//macromolecule localization;GO:0006869//lipid transport;GO:0051234//establishment of localization;GO:0006810//transport;GO:0008289//lipid binding;GO:0005488//binding;
BGI_novel_G000855	K15032//mTERF domain-containing protein, mitochondrial	GO:0050789//regulation of biological process;GO:0031323//regulation of cellular metabolic process;GO:0019222//regulation of metabolic process;GO:0009889//regulation of biosynthetic process;GO:0051171//regulation of nitrogen compound metabolic process;GO:0060255//regulation of macromolecule metabolic process;GO:0031326//regulation of cellular biosynthetic process;GO:2000112//regulation of cellular…
LOC110705288	K07428//cytochrome P450 family 4 subfamily X [EC:1.14.14.1];K07425//long-chain fatty acid omega-monooxygenase [EC:1.14.14.80]+ko00590//Arachidonic acid metabolism+ko01100//Metabolic pathways+ko00071//Fatty acid degradation	GO:0043167//ion binding;GO:0046872//metal ion binding;GO:0016491//oxidoreductase activity;GO:0043169//cation binding;GO:0003824//catalytic activity;GO:0004497//monooxygenase activity;GO:0005506//iron ion binding;GO:1901363//heterocyclic compound binding;GO:0020037//heme binding;GO:0097159//organic cyclic compound binding;GO:0046906//tetrapyrrole binding;GO:0046914//transition metal ion binding;GO…
LOC110734889	K00799//glutathione S-transferase [EC:2.5.1.18]+ko00480//Glutathione metabolism;K15190//7SK snRNA methylphosphate capping enzyme [EC:2.1.1.-]	NA
LOC110730395	K00703//starch synthase [EC:2.4.1.21]+ko01100//Metabolic pathways+ko00500//Starch and sucrose metabolism+ko01110//Biosynthesis of secondary metabolites	GO:0044238//primary metabolic process;GO:0044249//cellular biosynthetic process;GO:0044237//cellular metabolic process;GO:0034645//cellular macromolecule biosynthetic process;GO:0044260//cellular macromolecule metabolic process;GO:0019252//starch biosynthetic process;GO:0000271//polysaccharide biosynthetic process;GO:0009059//macromolecule biosynthetic process;GO:0044042//glucan metabolic process…
LOC110692462	K01519//inosine triphosphate pyrophosphatase [EC:3.6.1.-]+ko00230//Purine metabolism+ko01100//Metabolic pathways	GO:0018130//heterocycle biosynthetic process;GO:0006139//nucleobase-containing compound metabolic process;GO:1901361//organic cyclic compound catabolic process;GO:1901362//organic cyclic compound biosynthetic process;GO:0044238//primary metabolic process;GO:1901292//nucleoside phosphate catabolic process;GO:0044248//cellular catabolic process;GO:0044271//cellular nitrogen compound biosynthetic pr…
LOC110686077	K22312//hydroxyjasmonate sulfotransferase [EC:2.8.2.39]	NA
LOC110722237	K13648//alpha-1,4-galacturonosyltransferase [EC:2.4.1.43]+ko00520//Amino sugar and nucleotide sugar metabolism	GO:0016051//carbohydrate biosynthetic process;GO:0009987//cellular process;GO:0071704//organic substance metabolic process;GO:0009059//macromolecule biosynthetic process;GO:0008152//metabolic process;GO:0045488//pectin metabolic process;GO:0045229//external encapsulating structure organization;GO:0044238//primary metabolic process;GO:0045489//pectin biosynthetic process;GO:0043170//macromolecule …
LOC110704307	K08832//serine/threonine-protein kinase SRPK3 [EC:2.7.11.1]	GO:1901363//heterocyclic compound binding;GO:0035639//purine ribonucleoside triphosphate binding;GO:0140096//catalytic activity, acting on a protein;GO:0016773//phosphotransferase activity, alcohol group as acceptor;GO:0032559//adenyl ribonucleotide binding;GO:0036094//small molecule binding;GO:0005488//binding;GO:0043167//ion binding;GO:0000166//nucleotide binding;GO:0016772//transferase activit…
LOC110681683	K02575//MFS transporter, NNP family, nitrate/nitrite transporter+ko00910//Nitrogen metabolism	GO:0031224//intrinsic component of membrane;GO:0110165//cellular anatomical entity;GO:0016020//membrane;GO:0016021//integral component of membrane;GO:0022857//transmembrane transporter activity;GO:0005215//transporter activity;
LOC110715673	K12125//protein EARLY FLOWERING 3+ko04712//Circadian rhythm - plant;K01426//amidase [EC:3.5.1.4]+ko00380//Tryptophan metabolism+ko00330//Arginine and proline metabolism+ko00360//Phenylalanine metabolism;K04733//interleukin-1 receptor-associated kinase 4 [EC:2.7.11.1]	GO:0003824//catalytic activity;GO:0016491//oxidoreductase activity;GO:0009055//electron transfer activity;
LOC110692979	K06883//uncharacterized protein	GO:1901363//heterocyclic compound binding;GO:0001883//purine nucleoside binding;GO:0005488//binding;GO:0097367//carbohydrate derivative binding;GO:0001882//nucleoside binding;GO:0036094//small molecule binding;GO:0019001//guanyl nucleotide binding;GO:1901265//nucleoside phosphate binding;GO:0017076//purine nucleotide binding;GO:0003824//catalytic activity;GO:0000166//nucleotide binding;GO:0032555…
BGI_novel_G004242	K00011//aldehyde reductase [EC:1.1.1.21]+ko00040//Pentose and glucuronate interconversions+ko01100//Metabolic pathways+ko00052//Galactose metabolism+ko00051//Fructose and mannose metabolism+ko00790//Folate biosynthesis+ko00561//Glycerolipid metabolism	GO:0003824//catalytic activity;GO:0016491//oxidoreductase activity;
LOC110713044	K22374//3''-deamino-3''-oxonicotianamine reductase [EC:1.1.1.285]	GO:0003824//catalytic activity;GO:0016491//oxidoreductase activity;
LOC110704038	K17086//transmembrane 9 superfamily member 2/4;K17604//zinc finger SWIM domain-containing protein 3	NA
LOC110708800	K03549//KUP system potassium uptake protein;K14491//two-component response regulator ARR-B family+ko04075//Plant hormone signal transduction	NA
LOC110717527	K03327//multidrug resistance protein, MATE family	NA
LOC110685296	K04554//ubiquitin-conjugating enzyme E2 J2 [EC:2.3.2.23]+ko04141//Protein processing in endoplasmic reticulum+ko04120//Ubiquitin mediated proteolysis	GO:0016020//membrane;GO:0031224//intrinsic component of membrane;GO:0110165//cellular anatomical entity;GO:0016021//integral component of membrane;
LOC110689505	K10999//cellulose synthase A [EC:2.4.1.12]	GO:0009250//glucan biosynthetic process;GO:0030244//cellulose biosynthetic process;GO:0071704//organic substance metabolic process;GO:0044260//cellular macromolecule metabolic process;GO:0008152//metabolic process;GO:0071555//cell wall organization;GO:0051273//beta-glucan metabolic process;GO:0006073//cellular glucan metabolic process;GO:0034645//cellular macromolecule biosynthetic process;GO:004…
BGI_novel_G003116	K00423//L-ascorbate oxidase [EC:1.10.3.3]+ko01100//Metabolic pathways+ko00053//Ascorbate and aldarate metabolism	GO:0051179//localization;GO:0030001//metal ion transport;GO:0050801//ion homeostasis;GO:0098771//inorganic ion homeostasis;GO:0042592//homeostatic process;GO:0006810//transport;GO:0055065//metal ion homeostasis;GO:0000041//transition metal ion transport;GO:0055072//iron ion homeostasis;GO:0006812//cation transport;GO:0055076//transition metal ion homeostasis;GO:0065007//biological regulation;GO:0…
LOC110732060	K00512//steroid 17alpha-monooxygenase / 17alpha-hydroxyprogesterone deacetylase [EC:1.14.14.19 1.14.14.32]+ko01100//Metabolic pathways;K00847//fructokinase [EC:2.7.1.4]+ko00520//Amino sugar and nucleotide sugar metabolism+ko01100//Metabolic pathways+ko00051//Fructose and mannose metabolism+ko00500//Starch and sucrose metabolism	GO:0016772//transferase activity, transferring phosphorus-containing groups;GO:0003824//catalytic activity;GO:0016773//phosphotransferase activity, alcohol group as acceptor;GO:0016740//transferase activity;
LOC110734236	K07937//ADP-ribosylation factor 1+ko04144//Endocytosis;K07937//ADP-ribosylation factor 1+ko04144//Endocytosis	GO:0032561//guanyl ribonucleotide binding;GO:0019001//guanyl nucleotide binding;GO:0036094//small molecule binding;GO:0005525//GTP binding;GO:0043167//ion binding;GO:0005488//binding;GO:0043168//anion binding;GO:1901265//nucleoside phosphate binding;GO:0001882//nucleoside binding;GO:0097159//organic cyclic compound binding;GO:1901363//heterocyclic compound binding;GO:0032555//purine ribonucleotid…
LOC110694474	K14554//U3 small nucleolar RNA-associated protein 21+ko03008//Ribosome biogenesis in eukaryotes	GO:0006364//rRNA processing;GO:0009987//cellular process;GO:0034660//ncRNA metabolic process;GO:0071840//cellular component organization or biogenesis;GO:0044238//primary metabolic process;GO:1901360//organic cyclic compound metabolic process;GO:0006725//cellular aromatic compound metabolic process;GO:0044237//cellular metabolic process;GO:0006139//nucleobase-containing compound metabolic process…
LOC110716208	K17604//zinc finger SWIM domain-containing protein 3	NA
LOC110732393	K13199//plasminogen activator inhibitor 1 RNA-binding protein;K13199//plasminogen activator inhibitor 1 RNA-binding protein	GO:0003723//RNA binding;GO:1901363//heterocyclic compound binding;GO:0003676//nucleic acid binding;GO:0097159//organic cyclic compound binding;GO:0005488//binding;
LOC110737044	K01738//cysteine synthase [EC:2.5.1.47]+ko00920//Sulfur metabolism+ko01230//Biosynthesis of amino acids+ko01100//Metabolic pathways+ko01110//Biosynthesis of secondary metabolites+ko00270//Cysteine and methionine metabolism+ko01200//Carbon metabolism;K01738//cysteine synthase [EC:2.5.1.47]+ko00920//Sulfur metabolism+ko01230//Biosynthesis of amino acids+ko01100//Metabolic pathways+ko01110//Biosynth…	GO:1901566//organonitrogen compound biosynthetic process;GO:1901607//alpha-amino acid biosynthetic process;GO:0019344//cysteine biosynthetic process;GO:0046394//carboxylic acid biosynthetic process;GO:0044249//cellular biosynthetic process;GO:0009070//serine family amino acid biosynthetic process;GO:0006790//sulfur compound metabolic process;GO:1901605//alpha-amino acid metabolic process;GO:00160…
LOC110715440	K14566//U3 small nucleolar RNA-associated protein 24+ko03008//Ribosome biogenesis in eukaryotes;K09510//DnaJ homolog subfamily B member 4	GO:0009958//positive gravitropism;GO:0009605//response to external stimulus;GO:0009629//response to gravity;GO:0050896//response to stimulus;GO:0009606//tropism;GO:0009628//response to abiotic stimulus;GO:0009630//gravitropism;
LOC110730321	K10374//tropomyosin 2	GO:0016020//membrane;GO:0031224//intrinsic component of membrane;GO:0110165//cellular anatomical entity;GO:0016021//integral component of membrane;
BGI_novel_G003358	K03243//translation initiation factor 5B+ko03013//RNA transport	GO:1901363//heterocyclic compound binding;GO:0097367//carbohydrate derivative binding;GO:0003824//catalytic activity;GO:0043167//ion binding;GO:0043168//anion binding;GO:0036094//small molecule binding;GO:0016818//hydrolase activity, acting on acid anhydrides, in phosphorus-containing anhydrides;GO:0016817//hydrolase activity, acting on acid anhydrides;GO:0016462//pyrophosphatase activity;GO:0017…
LOC110728463	K04460//serine/threonine-protein phosphatase 5 [EC:3.1.3.16];K00134//glyceraldehyde 3-phosphate dehydrogenase [EC:1.2.1.12]+ko00010//Glycolysis / Gluconeogenesis+ko01230//Biosynthesis of amino acids+ko01100//Metabolic pathways+ko01110//Biosynthesis of secondary metabolites+ko00710//Carbon fixation in photosynthetic organisms+ko01200//Carbon metabolism;K12448//UDP-arabinose 4-epimerase [EC:5.1.3.5…	NA
LOC110719796	K02357//elongation factor Ts;K02357//elongation factor Ts;K02357//elongation factor Ts	GO:0043226//organelle;GO:0043227//membrane-bounded organelle;GO:0110165//cellular anatomical entity;GO:0043231//intracellular membrane-bounded organelle;GO:0005622//intracellular;GO:0005739//mitochondrion;GO:0005737//cytoplasm;GO:0043229//intracellular organelle;GO:0003723//RNA binding;GO:0045182//translation regulator activity;GO:0008135//translation factor activity, RNA binding;GO:1901363//hete…
LOC110688483	K10703//very-long-chain (3R)-3-hydroxyacyl-CoA dehydratase [EC:4.2.1.134]+ko01100//Metabolic pathways+ko01110//Biosynthesis of secondary metabolites+ko00062//Fatty acid elongation+ko01212//Fatty acid metabolism+ko01040//Biosynthesis of unsaturated fatty acids;K10703//very-long-chain (3R)-3-hydroxyacyl-CoA dehydratase [EC:4.2.1.134]+ko01100//Metabolic pathways+ko01110//Biosynthesis of secondary me…	GO:0072330//monocarboxylic acid biosynthetic process;GO:0044238//primary metabolic process;GO:0008610//lipid biosynthetic process;GO:1901576//organic substance biosynthetic process;GO:0044249//cellular biosynthetic process;GO:0016053//organic acid biosynthetic process;GO:0006633//fatty acid biosynthetic process;GO:0009987//cellular process;GO:0044283//small molecule biosynthetic process;GO:004423…
LOC110713642	K17604//zinc finger SWIM domain-containing protein 3;K17604//zinc finger SWIM domain-containing protein 3	NA
LOC110684656	K13944//LOB domain-containing protein 16	NA
LOC110687154	K05909//laccase [EC:1.10.3.2];K17604//zinc finger SWIM domain-containing protein 3;K14509//ethylene receptor [EC:2.7.13.-]+ko04016//MAPK signaling pathway - plant+ko04075//Plant hormone signal transduction	NA
LOC110694864	K10393//kinesin family member 2/24	GO:0010026//trichome differentiation;GO:0010089//xylem development;GO:0090058//metaxylem development;GO:0090558//plant epidermis development;GO:0097435//supramolecular fiber organization;GO:0009653//anatomical structure morphogenesis;GO:0016043//cellular component organization;GO:0022411//cellular component disassembly;GO:0071840//cellular component organization or biogenesis;GO:0032502//developm…
BGI_novel_G001975	K09422//transcription factor MYB, plant	GO:0090304//nucleic acid metabolic process;GO:0009059//macromolecule biosynthetic process;GO:0048366//leaf development;GO:0019438//aromatic compound biosynthetic process;GO:0010016//shoot system morphogenesis;GO:0032774//RNA biosynthetic process;GO:0034645//cellular macromolecule biosynthetic process;GO:0032501//multicellular organismal process;GO:0046483//heterocycle metabolic process;GO:0006351…
LOC110708722	K03254//translation initiation factor 3 subunit A+ko03013//RNA transport;K03254//translation initiation factor 3 subunit A+ko03013//RNA transport	GO:0043170//macromolecule metabolic process;GO:0009059//macromolecule biosynthetic process;GO:0044271//cellular nitrogen compound biosynthetic process;GO:0016043//cellular component organization;GO:0065003//protein-containing complex assembly;GO:0006518//peptide metabolic process;GO:0006807//nitrogen compound metabolic process;GO:0006412//translation;GO:0002181//cytoplasmic translation;GO:0044237…
LOC110686380	K15449//tRNA wybutosine-synthesizing protein 1 [EC:4.1.3.44]	GO:0016020//membrane;GO:0110165//cellular anatomical entity;GO:0031224//intrinsic component of membrane;GO:0016021//integral component of membrane;GO:0016740//transferase activity;GO:0016741//transferase activity, transferring one-carbon groups;GO:0003824//catalytic activity;GO:0008168//methyltransferase activity;
LOC110685803	K17681//ATPase family AAA domain-containing protein 3A/B	GO:0009987//cellular process;GO:0006996//organelle organization;GO:0016043//cellular component organization;GO:0007005//mitochondrion organization;GO:0071840//cellular component organization or biogenesis;GO:0043231//intracellular membrane-bounded organelle;GO:0005739//mitochondrion;GO:0043227//membrane-bounded organelle;GO:0043229//intracellular organelle;GO:0005737//cytoplasm;GO:0043226//organe…
LOC110685973	NA	GO:0010274//hydrotropism;GO:0050896//response to stimulus;GO:0009605//response to external stimulus;GO:0009606//tropism;
LOC110695356	K01652//acetolactate synthase I/II/III large subunit [EC:2.2.1.6]+ko00290//Valine, leucine and isoleucine biosynthesis+ko00770//Pantothenate and CoA biosynthesis+ko01230//Biosynthesis of amino acids+ko01100//Metabolic pathways+ko00650//Butanoate metabolism+ko01110//Biosynthesis of secondary metabolites+ko01210//2-Oxocarboxylic acid metabolism+ko00660//C5-Branched dibasic acid metabolism	GO:1901576//organic substance biosynthetic process;GO:0043436//oxoacid metabolic process;GO:0009097//isoleucine biosynthetic process;GO:0044249//cellular biosynthetic process;GO:0044281//small molecule metabolic process;GO:1901605//alpha-amino acid metabolic process;GO:0009987//cellular process;GO:0009082//branched-chain amino acid biosynthetic process;GO:0008652//cellular amino acid biosynthetic…
LOC110731785	K12761//carbon catabolite-derepressing protein kinase [EC:2.7.11.1];K07198//5'-AMP-activated protein kinase, catalytic alpha subunit [EC:2.7.11.11]	GO:0007165//signal transduction;GO:0009987//cellular process;GO:0051716//cellular response to stimulus;GO:0065007//biological regulation;GO:0050789//regulation of biological process;GO:0023052//signaling;GO:0050896//response to stimulus;GO:0007154//cell communication;GO:0050794//regulation of cellular process;GO:0032553//ribonucleotide binding;GO:1901265//nucleoside phosphate binding;GO:0016773//…
LOC110723681	K11275//histone H1/5;K11275//histone H1/5	GO:0016043//cellular component organization;GO:0006323//DNA packaging;GO:0034622//cellular protein-containing complex assembly;GO:0006325//chromatin organization;GO:0071840//cellular component organization or biogenesis;GO:0009987//cellular process;GO:0071824//protein-DNA complex subunit organization;GO:0065004//protein-DNA complex assembly;GO:0022607//cellular component assembly;GO:0034728//nucl…
LOC110712016	K14497//protein phosphatase 2C [EC:3.1.3.16]+ko04016//MAPK signaling pathway - plant+ko04075//Plant hormone signal transduction;K14497//protein phosphatase 2C [EC:3.1.3.16]+ko04016//MAPK signaling pathway - plant+ko04075//Plant hormone signal transduction	GO:0140096//catalytic activity, acting on a protein;GO:0004721//phosphoprotein phosphatase activity;GO:0016788//hydrolase activity, acting on ester bonds;GO:0016791//phosphatase activity;GO:0043167//ion binding;GO:0046872//metal ion binding;GO:0043169//cation binding;GO:0042578//phosphoric ester hydrolase activity;GO:0003824//catalytic activity;GO:0005488//binding;GO:0004722//protein serine/threo…
LOC110729454	K11270//chromosome transmission fidelity protein 8	GO:0051276//chromosome organization;GO:0140014//mitotic nuclear division;GO:0000070//mitotic sister chromatid segregation;GO:0007062//sister chromatid cohesion;GO:0071840//cellular component organization or biogenesis;GO:0006996//organelle organization;GO:0007059//chromosome segregation;GO:0000280//nuclear division;GO:0000819//sister chromatid segregation;GO:0022402//cell cycle process;GO:0048285…
LOC110691289	K00102//D-lactate dehydrogenase (cytochrome) [EC:1.1.2.4]+ko00620//Pyruvate metabolism;K15255//ATP-dependent DNA helicase PIF1 [EC:3.6.4.12];K12396//AP-3 complex subunit delta;K10756//replication factor C subunit 3/5+ko03420//Nucleotide excision repair+ko03030//DNA replication+ko03430//Mismatch repair;K19525//vacuolar protein sorting-associated protein 13A/C	GO:0034641//cellular nitrogen compound metabolic process;GO:0009987//cellular process;GO:0006259//DNA metabolic process;GO:1901360//organic cyclic compound metabolic process;GO:0006807//nitrogen compound metabolic process;GO:0006139//nucleobase-containing compound metabolic process;GO:0090304//nucleic acid metabolic process;GO:0044238//primary metabolic process;GO:0043170//macromolecule metabolic…
LOC110713334	K15688//E3 ubiquitin-protein ligase MUL1 [EC:2.3.2.27]	GO:0006996//organelle organization;GO:0071840//cellular component organization or biogenesis;GO:0016043//cellular component organization;GO:0009987//cellular process;GO:0016021//integral component of membrane;GO:0031224//intrinsic component of membrane;GO:0110165//cellular anatomical entity;GO:0016020//membrane;GO:0004842//ubiquitin-protein transferase activity;GO:0003824//catalytic activity;GO:0…
LOC110705743	K13216//nuclear inhibitor of protein phosphatase 1 [EC:3.1.4.-];K13216//nuclear inhibitor of protein phosphatase 1 [EC:3.1.4.-]	NA
BGI_novel_G000581	K04733//interleukin-1 receptor-associated kinase 4 [EC:2.7.11.1]	NA
LOC110688554	K20623//typhasterol/6-deoxotyphasterol 2alpha-hydroxylase+ko00905//Brassinosteroid biosynthesis+ko01100//Metabolic pathways+ko01110//Biosynthesis of secondary metabolites	NA
BGI_novel_G002522	K01681//aconitate hydratase [EC:4.2.1.3]+ko00020//Citrate cycle (TCA cycle)+ko01230//Biosynthesis of amino acids+ko01100//Metabolic pathways+ko01110//Biosynthesis of secondary metabolites+ko01210//2-Oxocarboxylic acid metabolism+ko01200//Carbon metabolism+ko00630//Glyoxylate and dicarboxylate metabolism	GO:0072350//tricarboxylic acid metabolic process;GO:0006091//generation of precursor metabolites and energy;GO:0071704//organic substance metabolic process;GO:0006099//tricarboxylic acid cycle;GO:0009060//aerobic respiration;GO:0006082//organic acid metabolic process;GO:0006101//citrate metabolic process;GO:0008152//metabolic process;GO:0019752//carboxylic acid metabolic process;GO:0055114//oxida…
LOC110728361	K08790//serine/threonine kinase 38 [EC:2.7.11.1]	NA
BGI_novel_G000623	K14488//SAUR family protein+ko04075//Plant hormone signal transduction	GO:0009733//response to auxin;GO:0009719//response to endogenous stimulus;GO:0042221//response to chemical;GO:0010033//response to organic substance;GO:0009725//response to hormone;GO:0050896//response to stimulus;
LOC110736585	K00993//ethanolaminephosphotransferase [EC:2.7.8.1]+ko00440//Phosphonate and phosphinate metabolism+ko01100//Metabolic pathways+ko01110//Biosynthesis of secondary metabolites+ko00564//Glycerophospholipid metabolism+ko00565//Ether lipid metabolism;K00993//ethanolaminephosphotransferase [EC:2.7.8.1]+ko00440//Phosphonate and phosphinate metabolism+ko01100//Metabolic pathways+ko01110//Biosynthesis of…	GO:0019637//organophosphate metabolic process;GO:0008654//phospholipid biosynthetic process;GO:0008152//metabolic process;GO:1901576//organic substance biosynthetic process;GO:0006629//lipid metabolic process;GO:0044249//cellular biosynthetic process;GO:0009987//cellular process;GO:0006793//phosphorus metabolic process;GO:0009058//biosynthetic process;GO:0006796//phosphate-containing compound met…
LOC110716012	K13237//peroxisomal 2,4-dienoyl-CoA reductase [EC:1.3.1.34]+ko04146//Peroxisome;K11147//dehydrogenase/reductase SDR family member 4 [EC:1.1.-.-]+ko04146//Peroxisome+ko01100//Metabolic pathways;K13237//peroxisomal 2,4-dienoyl-CoA reductase [EC:1.3.1.34]+ko04146//Peroxisome;K11147//dehydrogenase/reductase SDR family member 4 [EC:1.1.-.-]+ko04146//Peroxisome+ko01100//Metabolic pathways	NA
LOC110699973	K13420//LRR receptor-like serine/threonine-protein kinase FLS2 [EC:2.7.11.1]+ko04016//MAPK signaling pathway - plant+ko04626//Plant-pathogen interaction;K03283//heat shock 70kDa protein 1/2/6/8+ko03040//Spliceosome+ko04144//Endocytosis+ko04141//Protein processing in endoplasmic reticulum;K01265//methionyl aminopeptidase [EC:3.4.11.18];K12447//UDP-sugar pyrophosphorylase [EC:2.7.7.64]+ko00520//Ami…	NA
LOC110726371	K22534//PR domain zinc finger protein 5	GO:0005488//binding;GO:1901363//heterocyclic compound binding;GO:0097159//organic cyclic compound binding;GO:0003676//nucleic acid binding;
LOC110716082	K09571//FK506-binding protein 4/5 [EC:5.2.1.8]	NA
LOC110738469	K14792//rRNA biogenesis protein RRP5	GO:0022613//ribonucleoprotein complex biogenesis;GO:0034641//cellular nitrogen compound metabolic process;GO:0046483//heterocycle metabolic process;GO:0044237//cellular metabolic process;GO:0009553//embryo sac development;GO:0071704//organic substance metabolic process;GO:0044085//cellular component biogenesis;GO:0006725//cellular aromatic compound metabolic process;GO:0016071//mRNA metabolic pro…
LOC110683179	K01303//acylaminoacyl-peptidase [EC:3.4.19.1];K00799//glutathione S-transferase [EC:2.5.1.18]+ko00480//Glutathione metabolism;K09494//T-complex protein 1 subunit beta;K08176//MFS transporter, PHS family, inorganic phosphate transporter	NA
LOC110706435	K04733//interleukin-1 receptor-associated kinase 4 [EC:2.7.11.1];K12447//UDP-sugar pyrophosphorylase [EC:2.7.7.64]+ko00520//Amino sugar and nucleotide sugar metabolism+ko00040//Pentose and glucuronate interconversions+ko01100//Metabolic pathways+ko00052//Galactose metabolism+ko00053//Ascorbate and aldarate metabolism;K03515//DNA repair protein REV1 [EC:2.7.7.-];K20777//exonuclease 3'-5' domain-co…	NA
LOC110707975	K22804//structural maintenance of chromosomes protein 6;K01188//beta-glucosidase [EC:3.2.1.21]+ko01100//Metabolic pathways+ko00500//Starch and sucrose metabolism+ko01110//Biosynthesis of secondary metabolites+ko00460//Cyanoamino acid metabolism+ko00940//Phenylpropanoid biosynthesis;K01213//galacturan 1,4-alpha-galacturonidase [EC:3.2.1.67]+ko00040//Pentose and glucuronate interconversions+ko01100…	NA
LOC110699642	K08832//serine/threonine-protein kinase SRPK3 [EC:2.7.11.1];K08832//serine/threonine-protein kinase SRPK3 [EC:2.7.11.1]	GO:1901363//heterocyclic compound binding;GO:0016772//transferase activity, transferring phosphorus-containing groups;GO:0016301//kinase activity;GO:0016740//transferase activity;GO:0043167//ion binding;GO:0043168//anion binding;GO:1901265//nucleoside phosphate binding;GO:0097367//carbohydrate derivative binding;GO:0097159//organic cyclic compound binding;GO:0032555//purine ribonucleotide binding…
LOC110702814	K13366//polyamine oxidase [EC:1.5.3.14 1.5.3.16 1.5.3.-]+ko00410//beta-Alanine metabolism+ko00330//Arginine and proline metabolism+ko01100//Metabolic pathways;K13366//polyamine oxidase [EC:1.5.3.14 1.5.3.16 1.5.3.-]+ko00410//beta-Alanine metabolism+ko00330//Arginine and proline metabolism+ko01100//Metabolic pathways;K13366//polyamine oxidase [EC:1.5.3.14 1.5.3.16 1.5.3.-]+ko00410//beta-Alanine me…	NA
LOC110717970	K22395//cinnamyl-alcohol dehydrogenase [EC:1.1.1.195]+ko01100//Metabolic pathways+ko01110//Biosynthesis of secondary metabolites+ko00940//Phenylpropanoid biosynthesis;K00820//glucosamine---fructose-6-phosphate aminotransferase (isomerizing) [EC:2.6.1.16]+ko00250//Alanine, aspartate and glutamate metabolism+ko00520//Amino sugar and nucleotide sugar metabolism+ko01100//Metabolic pathways;K03386//pe…	NA
LOC110684959	K02154//V-type H+-transporting ATPase subunit a+ko04145//Phagosome+ko01100//Metabolic pathways+ko00190//Oxidative phosphorylation;K02154//V-type H+-transporting ATPase subunit a+ko04145//Phagosome+ko01100//Metabolic pathways+ko00190//Oxidative phosphorylation	GO:0033176//proton-transporting V-type ATPase complex;GO:0016020//membrane;GO:0000220//vacuolar proton-transporting V-type ATPase, V0 domain;GO:0043226//organelle;GO:0043229//intracellular organelle;GO:0098796//membrane protein complex;GO:0043227//membrane-bounded organelle;GO:0016021//integral component of membrane;GO:0110165//cellular anatomical entity;GO:0033179//proton-transporting V-type ATP…
LOC110693545	NA	GO:0110165//cellular anatomical entity;GO:0016020//membrane;GO:0016021//integral component of membrane;GO:0031224//intrinsic component of membrane;
LOC110722986	K02925//large subunit ribosomal protein L3e+ko03010//Ribosome;K12524//bifunctional aspartokinase / homoserine dehydrogenase 1 [EC:2.7.2.4 1.1.1.3]+ko00300//Lysine biosynthesis+ko01230//Biosynthesis of amino acids+ko01100//Metabolic pathways+ko01110//Biosynthesis of secondary metabolites+ko00261//Monobactam biosynthesis+ko00260//Glycine, serine and threonine metabolism+ko00270//Cysteine and methio…	NA
LOC110690007	K12165//ufm1-conjugating enzyme 1	NA
LOC110728756	K20043//clathrin coat assembly protein AP180	GO:0071840//cellular component organization or biogenesis;GO:0009987//cellular process;GO:0044085//cellular component biogenesis;GO:0065003//protein-containing complex assembly;GO:0048268//clathrin coat assembly;GO:0034622//cellular protein-containing complex assembly;GO:0016043//cellular component organization;GO:0022607//cellular component assembly;GO:0043933//protein-containing complex subunit…
LOC110683424	K15235//josephin [EC:3.4.19.12]	GO:0043170//macromolecule metabolic process;GO:0006508//proteolysis;GO:0071704//organic substance metabolic process;GO:0006807//nitrogen compound metabolic process;GO:0044238//primary metabolic process;GO:0044237//cellular metabolic process;GO:0019538//protein metabolic process;GO:0070647//protein modification by small protein conjugation or removal;GO:0036211//protein modification process;GO:004…
LOC110700866	K12524//bifunctional aspartokinase / homoserine dehydrogenase 1 [EC:2.7.2.4 1.1.1.3]+ko00300//Lysine biosynthesis+ko01230//Biosynthesis of amino acids+ko01100//Metabolic pathways+ko01110//Biosynthesis of secondary metabolites+ko00261//Monobactam biosynthesis+ko00260//Glycine, serine and threonine metabolism+ko00270//Cysteine and methionine metabolism;K13754//solute carrier family 24 (sodium/potas…	NA
LOC110692594	NA	GO:0016020//membrane;GO:0016021//integral component of membrane;GO:0110165//cellular anatomical entity;GO:0031224//intrinsic component of membrane;
LOC110697975	K05284//phosphatidylinositol glycan, class M [EC:2.4.1.-]+ko01100//Metabolic pathways+ko00563//Glycosylphosphatidylinositol (GPI)-anchor biosynthesis;K05284//phosphatidylinositol glycan, class M [EC:2.4.1.-]+ko01100//Metabolic pathways+ko00563//Glycosylphosphatidylinositol (GPI)-anchor biosynthesis;K05284//phosphatidylinositol glycan, class M [EC:2.4.1.-]+ko01100//Metabolic pathways+ko00563//Glyc…	GO:0044237//cellular metabolic process;GO:0046467//membrane lipid biosynthetic process;GO:0006644//phospholipid metabolic process;GO:0008610//lipid biosynthetic process;GO:0036211//protein modification process;GO:0019637//organophosphate metabolic process;GO:0006464//cellular protein modification process;GO:0006650//glycerophospholipid metabolic process;GO:0006505//GPI anchor metabolic process;GO…
LOC110701056	K19269//phosphoglycolate phosphatase [EC:3.1.3.18 3.1.3.48]+ko01100//Metabolic pathways+ko01110//Biosynthesis of secondary metabolites+ko01200//Carbon metabolism+ko00630//Glyoxylate and dicarboxylate metabolism;K19269//phosphoglycolate phosphatase [EC:3.1.3.18 3.1.3.48]+ko01100//Metabolic pathways+ko01110//Biosynthesis of secondary metabolites+ko01200//Carbon metabolism+ko00630//Glyoxylate and di…	GO:0044237//cellular metabolic process;GO:0008152//metabolic process;GO:0006793//phosphorus metabolic process;GO:0009987//cellular process;GO:0016311//dephosphorylation;GO:0006796//phosphate-containing compound metabolic process;GO:0016788//hydrolase activity, acting on ester bonds;GO:0016787//hydrolase activity;GO:0042578//phosphoric ester hydrolase activity;GO:0016791//phosphatase activity;GO:0…
LOC110724774	K20535//mitogen-activated protein kinase 1/2 [EC:2.7.11.24]+ko04016//MAPK signaling pathway - plant	GO:0005488//binding;GO:0000166//nucleotide binding;GO:0032555//purine ribonucleotide binding;GO:1901363//heterocyclic compound binding;GO:0004707//MAP kinase activity;GO:0097159//organic cyclic compound binding;GO:0016773//phosphotransferase activity, alcohol group as acceptor;GO:0004672//protein kinase activity;GO:0016301//kinase activity;GO:0005524//ATP binding;GO:0017076//purine nucleotide bin…
LOC110723550	NA	GO:0016020//membrane;GO:0016021//integral component of membrane;GO:0110165//cellular anatomical entity;GO:0031224//intrinsic component of membrane;
LOC110688535	K03237//translation initiation factor 2 subunit 1+ko04141//Protein processing in endoplasmic reticulum+ko03013//RNA transport	GO:0097159//organic cyclic compound binding;GO:0003743//translation initiation factor activity;GO:0008135//translation factor activity, RNA binding;GO:0045182//translation regulator activity;GO:0005488//binding;GO:0090079//translation regulator activity, nucleic acid binding;GO:0003676//nucleic acid binding;GO:0003723//RNA binding;GO:1901363//heterocyclic compound binding;
LOC110697705	K17686//Cu+-exporting ATPase [EC:3.6.3.54]+ko04016//MAPK signaling pathway - plant;K17686//Cu+-exporting ATPase [EC:3.6.3.54]+ko04016//MAPK signaling pathway - plant;K17686//Cu+-exporting ATPase [EC:3.6.3.54]+ko04016//MAPK signaling pathway - plant	GO:0006810//transport;GO:0006811//ion transport;GO:0051179//localization;GO:0051234//establishment of localization;GO:0006812//cation transport;GO:0030001//metal ion transport;GO:0110165//cellular anatomical entity;GO:0016021//integral component of membrane;GO:0016020//membrane;GO:0031224//intrinsic component of membrane;GO:0005488//binding;GO:0005524//ATP binding;GO:0022804//active transmembrane…
LOC110729834	K18666//activating signal cointegrator complex subunit 1;K18666//activating signal cointegrator complex subunit 1;K18666//activating signal cointegrator complex subunit 1;K18666//activating signal cointegrator complex subunit 1	NA
LOC110737384	K15333//tRNA guanosine-2'-O-methyltransferase [EC:2.1.1.34];K12619//5'-3' exoribonuclease 2 [EC:3.1.13.-]+ko03018//RNA degradation+ko03008//Ribosome biogenesis in eukaryotes;K13199//plasminogen activator inhibitor 1 RNA-binding protein;K13124//mitogen-activated protein kinase organizer 1;K14568//rRNA small subunit pseudouridine methyltransferase Nep1 [EC:2.1.1.260]+ko03008//Ribosome biogenesis in…	GO:0004175//endopeptidase activity;GO:0016787//hydrolase activity;GO:0008236//serine-type peptidase activity;GO:0017171//serine hydrolase activity;GO:0016825//hydrolase activity, acting on acid phosphorus-nitrogen bonds;GO:0003824//catalytic activity;GO:0140096//catalytic activity, acting on a protein;GO:0004252//serine-type endopeptidase activity;GO:0070011//peptidase activity, acting on L-amino…
LOC110734300	K17422//large subunit ribosomal protein L41	NA
LOC110734929	K02218//casein kinase 1 [EC:2.7.11.1]	NA
BGI_novel_G003582	K14964//Set1/Ash2 histone methyltransferase complex subunit ASH2	NA
LOC110691992	K00660//chalcone synthase [EC:2.3.1.74]+ko04712//Circadian rhythm - plant+ko01100//Metabolic pathways+ko01110//Biosynthesis of secondary metabolites+ko00941//Flavonoid biosynthesis	NA
LOC110709208	K01303//acylaminoacyl-peptidase [EC:3.4.19.1];K00696//sucrose-phosphate synthase [EC:2.4.1.14]+ko01100//Metabolic pathways+ko00500//Starch and sucrose metabolism;K08176//MFS transporter, PHS family, inorganic phosphate transporter	NA
LOC110715778	NA	GO:0042546//cell wall biogenesis;GO:0045489//pectin biosynthetic process;GO:0071704//organic substance metabolic process;GO:0071840//cellular component organization or biogenesis;GO:0005976//polysaccharide metabolic process;GO:0009058//biosynthetic process;GO:0009059//macromolecule biosynthetic process;GO:0008152//metabolic process;GO:0005975//carbohydrate metabolic process;GO:0000271//polysaccha…
LOC110732804	K00679//phospholipid:diacylglycerol acyltransferase [EC:2.3.1.158]+ko01100//Metabolic pathways+ko00561//Glycerolipid metabolism;K10691//E3 ubiquitin-protein ligase UBR4 [EC:2.3.2.27];K14209//solute carrier family 36 (proton-coupled amino acid transporter);K01188//beta-glucosidase [EC:3.2.1.21]+ko01100//Metabolic pathways+ko00500//Starch and sucrose metabolism+ko01110//Biosynthesis of secondary me…	NA
LOC110702919	K11866//STAM-binding protein [EC:3.4.19.12]+ko04144//Endocytosis	NA
LOC110702053	K00660//chalcone synthase [EC:2.3.1.74]+ko04712//Circadian rhythm - plant+ko01100//Metabolic pathways+ko01110//Biosynthesis of secondary metabolites+ko00941//Flavonoid biosynthesis	NA
LOC110700859	K14677//aminoacylase [EC:3.5.1.14]+ko00220//Arginine biosynthesis+ko01230//Biosynthesis of amino acids+ko01100//Metabolic pathways+ko01110//Biosynthesis of secondary metabolites+ko01210//2-Oxocarboxylic acid metabolism;K14857//AdoMet-dependent rRNA methyltransferase SPB1 [EC:2.1.1.-];K14503//brassinosteroid resistant 1/2+ko04075//Plant hormone signal transduction;K15095//(+)-neomenthol dehydrogen…	NA
LOC110697621	K15718//linoleate 9S-lipoxygenase [EC:1.13.11.58]+ko00591//Linoleic acid metabolism;K09754//5-O-(4-coumaroyl)-D-quinate 3'-monooxygenase [EC:1.14.14.96]+ko01100//Metabolic pathways+ko01110//Biosynthesis of secondary metabolites+ko00940//Phenylpropanoid biosynthesis+ko00941//Flavonoid biosynthesis+ko00945//Stilbenoid, diarylheptanoid and gingerol biosynthesis;K08176//MFS transporter, PHS family, i…	NA
LOC110685863	K12309//beta-galactosidase [EC:3.2.1.23]+ko00600//Sphingolipid metabolism+ko00604//Glycosphingolipid biosynthesis - ganglio series+ko00531//Glycosaminoglycan degradation+ko00511//Other glycan degradation+ko01100//Metabolic pathways+ko00052//Galactose metabolism	GO:0071704//organic substance metabolic process;GO:0008152//metabolic process;GO:0044238//primary metabolic process;GO:0005975//carbohydrate metabolic process;GO:0003824//catalytic activity;GO:0030246//carbohydrate binding;GO:0004553//hydrolase activity, hydrolyzing O-glycosyl compounds;GO:0016798//hydrolase activity, acting on glycosyl bonds;GO:0015925//galactosidase activity;GO:0004565//beta-ga…
LOC110704310	K03190//urease accessory protein;K03190//urease accessory protein	GO:0008152//metabolic process;GO:0006807//nitrogen compound metabolic process;GO:0016151//nickel cation binding;GO:0043169//cation binding;GO:0043167//ion binding;GO:0046872//metal ion binding;GO:0046914//transition metal ion binding;GO:0005488//binding;
LOC110710337	K11262//acetyl-CoA carboxylase / biotin carboxylase 1 [EC:6.4.1.2 6.3.4.14 2.1.3.15]+ko00640//Propanoate metabolism+ko01100//Metabolic pathways+ko01110//Biosynthesis of secondary metabolites+ko00061//Fatty acid biosynthesis+ko01212//Fatty acid metabolism+ko00620//Pyruvate metabolism	NA
LOC110731932	K01303//acylaminoacyl-peptidase [EC:3.4.19.1];K00799//glutathione S-transferase [EC:2.5.1.18]+ko00480//Glutathione metabolism;K02704//photosystem II CP47 chlorophyll apoprotein+ko01100//Metabolic pathways+ko00195//Photosynthesis;K08176//MFS transporter, PHS family, inorganic phosphate transporter	NA
LOC110715110	K20667//beta-amyrin 28-monooxygenase [EC:1.14.14.126]	NA
LOC110698185	K14411//RNA-binding protein Musashi+ko03015//mRNA surveillance pathway	NA
LOC110723559	K09338//homeobox-leucine zipper protein;K09338//homeobox-leucine zipper protein	GO:0019222//regulation of metabolic process;GO:2001141//regulation of RNA biosynthetic process;GO:0031326//regulation of cellular biosynthetic process;GO:0019219//regulation of nucleobase-containing compound metabolic process;GO:0080090//regulation of primary metabolic process;GO:0010468//regulation of gene expression;GO:0065007//biological regulation;GO:0051252//regulation of RNA metabolic proce…
LOC110722906	NA	GO:0016021//integral component of membrane;GO:0031224//intrinsic component of membrane;GO:0016020//membrane;GO:0110165//cellular anatomical entity;
LOC110691482	K13412//calcium-dependent protein kinase [EC:2.7.11.1]+ko04626//Plant-pathogen interaction	GO:0017076//purine nucleotide binding;GO:0140096//catalytic activity, acting on a protein;GO:0046872//metal ion binding;GO:0016301//kinase activity;GO:0005524//ATP binding;GO:0043169//cation binding;GO:0097367//carbohydrate derivative binding;GO:0016772//transferase activity, transferring phosphorus-containing groups;GO:0005488//binding;GO:0030554//adenyl nucleotide binding;GO:0016773//phosphotra…
LOC110738114	K11323//histone arginine demethylase JMJD6 [EC:1.14.11.-]	NA
LOC110683943	K15102//solute carrier family 25 (mitochondrial phosphate transporter), member 3	GO:0110165//cellular anatomical entity;GO:0016020//membrane;GO:0016021//integral component of membrane;GO:0031224//intrinsic component of membrane;
LOC110730409	K17604//zinc finger SWIM domain-containing protein 3;K17604//zinc finger SWIM domain-containing protein 3	NA
LOC110689213	K00861//riboflavin kinase [EC:2.7.1.26]+ko00740//Riboflavin metabolism+ko01100//Metabolic pathways+ko01110//Biosynthesis of secondary metabolites	NA
LOC110726286	K03243//translation initiation factor 5B+ko03013//RNA transport;K17046//protein DEK	NA
LOC110689847	K20537//mitogen-activated protein kinase 7/14 [EC:2.7.11.24]+ko04016//MAPK signaling pathway - plant;K04733//interleukin-1 receptor-associated kinase 4 [EC:2.7.11.1];K15190//7SK snRNA methylphosphate capping enzyme [EC:2.1.1.-];K20537//mitogen-activated protein kinase 7/14 [EC:2.7.11.24]+ko04016//MAPK signaling pathway - plant;K04733//interleukin-1 receptor-associated kinase 4 [EC:2.7.11.1];K1519…	NA
BGI_novel_G002226	K11323//histone arginine demethylase JMJD6 [EC:1.14.11.-]	GO:0043227//membrane-bounded organelle;GO:0043231//intracellular membrane-bounded organelle;GO:0110165//cellular anatomical entity;GO:0005622//intracellular;GO:0043229//intracellular organelle;GO:0043226//organelle;GO:0005634//nucleus;GO:0003723//RNA binding;GO:0003729//mRNA binding;GO:1901363//heterocyclic compound binding;GO:0005488//binding;GO:0003676//nucleic acid binding;GO:0097159//organic …
LOC110688200	K11838//ubiquitin carboxyl-terminal hydrolase 7 [EC:3.4.19.12]	GO:0044257//cellular protein catabolic process;GO:0044265//cellular macromolecule catabolic process;GO:0006464//cellular protein modification process;GO:0019538//protein metabolic process;GO:0036211//protein modification process;GO:0009987//cellular process;GO:0019941//modification-dependent protein catabolic process;GO:0044260//cellular macromolecule metabolic process;GO:0008152//metabolic proce…
LOC110682662	K15271//ATP-dependent DNA helicase HFM1/MER3 [EC:3.6.4.12]	NA
LOC110692375	K00826//branched-chain amino acid aminotransferase [EC:2.6.1.42]+ko00290//Valine, leucine and isoleucine biosynthesis+ko00280//Valine, leucine and isoleucine degradation+ko00770//Pantothenate and CoA biosynthesis+ko01230//Biosynthesis of amino acids+ko01100//Metabolic pathways+ko01110//Biosynthesis of secondary metabolites+ko01210//2-Oxocarboxylic acid metabolism+ko00270//Cysteine and methionine …	NA
BGI_novel_G001498	K07953//GTP-binding protein SAR1 [EC:3.6.5.-]+ko04141//Protein processing in endoplasmic reticulum	NA
LOC110690283	K14325//RNA-binding protein with serine-rich domain 1+ko03015//mRNA surveillance pathway+ko03013//RNA transport	GO:0003723//RNA binding;GO:0003676//nucleic acid binding;GO:1901363//heterocyclic compound binding;GO:0097159//organic cyclic compound binding;GO:0005488//binding;
LOC110704326	K01802//peptidylprolyl isomerase [EC:5.2.1.8]	NA
LOC110684038	K14494//DELLA protein+ko04075//Plant hormone signal transduction;K14494//DELLA protein+ko04075//Plant hormone signal transduction	NA
LOC110726817	K07739//elongator complex protein 3 [EC:2.3.1.48]	GO:1901360//organic cyclic compound metabolic process;GO:0006778//porphyrin-containing compound metabolic process;GO:1901362//organic cyclic compound biosynthetic process;GO:1901576//organic substance biosynthetic process;GO:0034641//cellular nitrogen compound metabolic process;GO:0006779//porphyrin-containing compound biosynthetic process;GO:0006807//nitrogen compound metabolic process;GO:000998…
LOC110701193	K06269//serine/threonine-protein phosphatase PP1 catalytic subunit [EC:3.1.3.16]+ko03015//mRNA surveillance pathway;K10590//E3 ubiquitin-protein ligase TRIP12 [EC:2.3.2.26]+ko04120//Ubiquitin mediated proteolysis;K08332//vacuolar protein 8	GO:0006886//intracellular protein transport;GO:0033036//macromolecule localization;GO:0072594//establishment of protein localization to organelle;GO:0046907//intracellular transport;GO:0015031//protein transport;GO:0045184//establishment of protein localization;GO:0033365//protein localization to organelle;GO:0051169//nuclear transport;GO:0051641//cellular localization;GO:0051179//localization;GO…
LOC110685183	K13383//(RS)-norcoclaurine 6-O-methyltransferase [EC:2.1.1.128]+ko01100//Metabolic pathways+ko00950//Isoquinoline alkaloid biosynthesis+ko01110//Biosynthesis of secondary metabolites;K16040//trans-resveratrol di-O-methyltransferase [EC:2.1.1.240]+ko00945//Stilbenoid, diarylheptanoid and gingerol biosynthesis;K13383//(RS)-norcoclaurine 6-O-methyltransferase [EC:2.1.1.128]+ko01100//Metabolic pathwa…	NA
LOC110715139	K15255//ATP-dependent DNA helicase PIF1 [EC:3.6.4.12]	NA
LOC110697240	K00574//cyclopropane-fatty-acyl-phospholipid synthase [EC:2.1.1.79]	GO:0016491//oxidoreductase activity;GO:0003824//catalytic activity;
LOC110721812	K13201//nucleolysin TIA-1/TIAR;K13201//nucleolysin TIA-1/TIAR	GO:0003676//nucleic acid binding;GO:0005488//binding;GO:0097159//organic cyclic compound binding;GO:0003723//RNA binding;GO:1901363//heterocyclic compound binding;
LOC110733166	K17604//zinc finger SWIM domain-containing protein 3;K08853//AP2-associated kinase [EC:2.7.11.1]	NA
LOC110689775	K15115//solute carrier family 25 (mitochondrial folate transporter), member 32	GO:0016021//integral component of membrane;GO:0016020//membrane;GO:0031224//intrinsic component of membrane;GO:0110165//cellular anatomical entity;GO:0015932//nucleobase-containing compound transmembrane transporter activity;GO:0015605//organophosphate ester transmembrane transporter activity;GO:0008509//anion transmembrane transporter activity;GO:0022857//transmembrane transporter activity;GO:00…
LOC110686950	K17553//protein phosphatase 1 regulatory subunit 11	NA
BGI_novel_G004285	K03549//KUP system potassium uptake protein;K13111//WD40 repeat-containing protein SMU1	NA
LOC110729085	K08490//syntaxin 5+ko04130//SNARE interactions in vesicular transport	GO:0006906//vesicle fusion;GO:0061024//membrane organization;GO:0051649//establishment of localization in cell;GO:0048193//Golgi vesicle transport;GO:0006810//transport;GO:0061025//membrane fusion;GO:0048284//organelle fusion;GO:0015031//protein transport;GO:0006886//intracellular protein transport;GO:0009987//cellular process;GO:0015833//peptide transport;GO:0022406//membrane docking;GO:0051179/…
LOC110686937	K11423//histone-lysine N-methyltransferase SETD2 [EC:2.1.1.43]+ko00310//Lysine degradation	NA
LOC110717540	K01184//polygalacturonase [EC:3.2.1.15]+ko00040//Pentose and glucuronate interconversions+ko01100//Metabolic pathways	GO:0016043//cellular component organization;GO:0008152//metabolic process;GO:0071840//cellular component organization or biogenesis;GO:0044238//primary metabolic process;GO:0045229//external encapsulating structure organization;GO:0071555//cell wall organization;GO:0071554//cell wall organization or biogenesis;GO:0071704//organic substance metabolic process;GO:0009987//cellular process;GO:0005975…
LOC110725652	K14638//solute carrier family 15 (peptide/histidine transporter), member 3/4	GO:0006810//transport;GO:0051179//localization;GO:0042886//amide transport;GO:0006857//oligopeptide transport;GO:0071705//nitrogen compound transport;GO:0015833//peptide transport;GO:0071702//organic substance transport;GO:0051234//establishment of localization;GO:0031224//intrinsic component of membrane;GO:0110165//cellular anatomical entity;GO:0016021//integral component of membrane;GO:0016020/…
LOC110705630	K19613//leucine-rich repeat protein SHOC2;K15078//structure-specific endonuclease subunit SLX1 [EC:3.6.1.-]	NA
LOC110719522	K22912//5-amino-6-(5-phospho-D-ribitylamino)uracil phosphatase [EC:3.1.3.104]+ko00740//Riboflavin metabolism+ko01100//Metabolic pathways+ko01110//Biosynthesis of secondary metabolites	GO:0016787//hydrolase activity;GO:0003824//catalytic activity;
LOC110732000	K01303//acylaminoacyl-peptidase [EC:3.4.19.1];K00799//glutathione S-transferase [EC:2.5.1.18]+ko00480//Glutathione metabolism;K08176//MFS transporter, PHS family, inorganic phosphate transporter;K02704//photosystem II CP47 chlorophyll apoprotein+ko01100//Metabolic pathways+ko00195//Photosynthesis;K19861//benzyl alcohol O-benzoyltransferase [EC:2.3.1.196 2.3.1.232]	NA
BGI_novel_G005169	K22155//E3 ubiquitin-protein ligase Jade-2 [EC:2.3.2.27];K22156//protein Jade-3;K11348//bromodomain and PHD finger-containing protein 1	GO:0043231//intracellular membrane-bounded organelle;GO:0005622//intracellular;GO:0110165//cellular anatomical entity;GO:0043226//organelle;GO:0005634//nucleus;GO:0043227//membrane-bounded organelle;GO:0043229//intracellular organelle;GO:0005488//binding;GO:0043167//ion binding;GO:0043169//cation binding;GO:0046872//metal ion binding;
BGI_novel_G003428	K22845//phlorizin synthase [EC:2.4.1.357]+ko01110//Biosynthesis of secondary metabolites+ko00941//Flavonoid biosynthesis	NA
LOC110687316	K10862//tyrosyl-DNA phosphodiesterase 1 [EC:3.1.4.-];K10862//tyrosyl-DNA phosphodiesterase 1 [EC:3.1.4.-];K10862//tyrosyl-DNA phosphodiesterase 1 [EC:3.1.4.-];K10862//tyrosyl-DNA phosphodiesterase 1 [EC:3.1.4.-]	GO:0006259//DNA metabolic process;GO:0009987//cellular process;GO:0006139//nucleobase-containing compound metabolic process;GO:0008152//metabolic process;GO:0006807//nitrogen compound metabolic process;GO:0071704//organic substance metabolic process;GO:0050896//response to stimulus;GO:0006281//DNA repair;GO:0044238//primary metabolic process;GO:0046483//heterocycle metabolic process;GO:0044260//c…
LOC110705407	K04733//interleukin-1 receptor-associated kinase 4 [EC:2.7.11.1];K17609//nucleoredoxin [EC:1.8.1.8];K04733//interleukin-1 receptor-associated kinase 4 [EC:2.7.11.1];K17609//nucleoredoxin [EC:1.8.1.8];K04733//interleukin-1 receptor-associated kinase 4 [EC:2.7.11.1];K17609//nucleoredoxin [EC:1.8.1.8];K04733//interleukin-1 receptor-associated kinase 4 [EC:2.7.11.1];K17609//nucleoredoxin [EC:1.8.1.8]	NA
LOC110727148	NA	GO:1903506//regulation of nucleic acid-templated transcription;GO:0065007//biological regulation;GO:0006355//regulation of transcription, DNA-templated;GO:0031326//regulation of cellular biosynthetic process;GO:0019222//regulation of metabolic process;GO:0009889//regulation of biosynthetic process;GO:2000112//regulation of cellular macromolecule biosynthetic process;GO:0010556//regulation of macr…
LOC110719342	K14326//regulator of nonsense transcripts 1 [EC:3.6.4.-]+ko03015//mRNA surveillance pathway+ko03013//RNA transport;K05658//ATP-binding cassette, subfamily B (MDR/TAP), member 1 [EC:7.6.2.2]+ko02010//ABC transporters;K22794//flavonol-3-O-glucoside/galactoside glucosyltransferase [EC:2.4.1.239 2.4.1.-]+ko00944//Flavone and flavonol biosynthesis;K01762//1-aminocyclopropane-1-carboxylate synthase [EC…	NA
LOC110702600	NA	GO:0097159//organic cyclic compound binding;GO:0005488//binding;GO:1901363//heterocyclic compound binding;GO:0003676//nucleic acid binding;
LOC110685599	NA	GO:0016021//integral component of membrane;GO:0016020//membrane;GO:0110165//cellular anatomical entity;GO:0031224//intrinsic component of membrane;
LOC110697297	K02183//calmodulin+ko04016//MAPK signaling pathway - plant+ko04626//Plant-pathogen interaction+ko04070//Phosphatidylinositol signaling system	GO:0005488//binding;GO:0046872//metal ion binding;GO:0005509//calcium ion binding;GO:0043167//ion binding;GO:0043169//cation binding;
LOC110692961	K14692//solute carrier family 30 (zinc transporter), member 5/7;K14692//solute carrier family 30 (zinc transporter), member 5/7;K14692//solute carrier family 30 (zinc transporter), member 5/7	GO:0016020//membrane;GO:0016021//integral component of membrane;GO:0110165//cellular anatomical entity;GO:0031224//intrinsic component of membrane;GO:0015075//ion transmembrane transporter activity;GO:0022857//transmembrane transporter activity;GO:0005215//transporter activity;GO:0008324//cation transmembrane transporter activity;
BGI_novel_G001617	K00423//L-ascorbate oxidase [EC:1.10.3.3]+ko01100//Metabolic pathways+ko00053//Ascorbate and aldarate metabolism	NA
LOC110719395	K03453//bile acid:Na+ symporter, BASS family;K03453//bile acid:Na+ symporter, BASS family	GO:0110165//cellular anatomical entity;GO:0016021//integral component of membrane;GO:0031224//intrinsic component of membrane;GO:0016020//membrane;
LOC110722699	NA	GO:0006629//lipid metabolic process;GO:0008152//metabolic process;GO:0071704//organic substance metabolic process;GO:0044238//primary metabolic process;
LOC110688403	K20174//oxysterol-binding protein-related protein 1/2	GO:0005737//cytoplasm;GO:0005622//intracellular;GO:0043229//intracellular organelle;GO:0043227//membrane-bounded organelle;GO:0016020//membrane;GO:0110165//cellular anatomical entity;GO:0005829//cytosol;GO:0043231//intracellular membrane-bounded organelle;GO:0043226//organelle;GO:0097159//organic cyclic compound binding;GO:0008289//lipid binding;GO:0005496//steroid binding;GO:0005488//binding;GO:…
LOC110730547	K03405//magnesium chelatase subunit I [EC:6.6.1.1]+ko00860//Porphyrin and chlorophyll metabolism+ko01100//Metabolic pathways+ko01110//Biosynthesis of secondary metabolites	GO:0006779//porphyrin-containing compound biosynthetic process;GO:0006807//nitrogen compound metabolic process;GO:0071704//organic substance metabolic process;GO:0009987//cellular process;GO:0042440//pigment metabolic process;GO:0044249//cellular biosynthetic process;GO:0034641//cellular nitrogen compound metabolic process;GO:0015979//photosynthesis;GO:0015995//chlorophyll biosynthetic process;GO…
LOC110703855	K21919//BTB/POZ domain-containing protein KCTD9;K20290//conserved oligomeric Golgi complex subunit 3;K22503//aspartyl-tRNA synthetase [EC:6.1.1.12]+ko00970//Aminoacyl-tRNA biosynthesis;K02575//MFS transporter, NNP family, nitrate/nitrite transporter+ko00910//Nitrogen metabolism;K08835//serine/threonine-protein kinase OSR1/STK39 [EC:2.7.11.1]	NA
LOC110693093	K13457//disease resistance protein RPM1+ko04626//Plant-pathogen interaction;K13457//disease resistance protein RPM1+ko04626//Plant-pathogen interaction	GO:0050896//response to stimulus;GO:0006950//response to stress;GO:0006952//defense response;GO:0017076//purine nucleotide binding;GO:0036094//small molecule binding;GO:0005488//binding;GO:0005524//ATP binding;GO:0043167//ion binding;GO:0097159//organic cyclic compound binding;GO:0032553//ribonucleotide binding;GO:0035639//purine ribonucleoside triphosphate binding;GO:0043531//ADP binding;GO:1901…
LOC110724705	K11450//lysine-specific histone demethylase 1A [EC:1.-.-.-]	GO:0016491//oxidoreductase activity;GO:1901363//heterocyclic compound binding;GO:0003676//nucleic acid binding;GO:0003824//catalytic activity;GO:0097159//organic cyclic compound binding;GO:0003677//DNA binding;GO:0005488//binding;
LOC110702405	K15083//DNA repair protein RAD16	NA
LOC110729091	NA	GO:0043167//ion binding;GO:0005488//binding;GO:0043169//cation binding;GO:0046872//metal ion binding;
LOC110734771	K04733//interleukin-1 receptor-associated kinase 4 [EC:2.7.11.1];K05391//cyclic nucleotide gated channel, plant+ko04626//Plant-pathogen interaction	NA
LOC110731741	K13148//integrator complex subunit 11 [EC:3.1.27.-]	GO:0110165//cellular anatomical entity;GO:0016020//membrane;GO:0031224//intrinsic component of membrane;GO:0016021//integral component of membrane;
LOC110730135	K08488//syntaxin 7+ko04145//Phagosome+ko04130//SNARE interactions in vesicular transport	GO:0070727//cellular macromolecule localization;GO:0034613//cellular protein localization;GO:0033036//macromolecule localization;GO:0015031//protein transport;GO:0051649//establishment of localization in cell;GO:0045184//establishment of protein localization;GO:0051234//establishment of localization;GO:0006810//transport;GO:0046907//intracellular transport;GO:0016192//vesicle-mediated transport;G…
LOC110735810	K20299//vacuolar protein sorting-associated protein 53;K14857//AdoMet-dependent rRNA methyltransferase SPB1 [EC:2.1.1.-];K02641//ferredoxin--NADP+ reductase [EC:1.18.1.2]+ko01100//Metabolic pathways+ko00195//Photosynthesis	NA
BGI_novel_G000380	K01530//phospholipid-translocating ATPase [EC:7.6.2.1]	GO:0033036//macromolecule localization;GO:0051179//localization;GO:0071702//organic substance transport;GO:0006869//lipid transport;GO:0006810//transport;GO:0015748//organophosphate ester transport;GO:0006811//ion transport;GO:0015711//organic anion transport;GO:0051234//establishment of localization;GO:0010876//lipid localization;GO:0015914//phospholipid transport;GO:0006820//anion transport;GO:…
LOC110712642	K01180//endo-1,3(4)-beta-glucanase [EC:3.2.1.6];K10747//DNA ligase 1 [EC:6.5.1.1 6.5.1.6 6.5.1.7]+ko03420//Nucleotide excision repair+ko03030//DNA replication+ko03410//Base excision repair+ko03430//Mismatch repair	GO:0009987//cellular process;GO:0051179//localization;GO:0055085//transmembrane transport;GO:0051234//establishment of localization;GO:0006810//transport;GO:0031224//intrinsic component of membrane;GO:0110165//cellular anatomical entity;GO:0016021//integral component of membrane;GO:0016020//membrane;GO:0005488//binding;GO:0097367//carbohydrate derivative binding;GO:0008061//chitin binding;GO:0030…
LOC110684834	K14855//ribosome assembly protein 4;K14855//ribosome assembly protein 4;K14855//ribosome assembly protein 4;K14855//ribosome assembly protein 4;K14855//ribosome assembly protein 4;K14855//ribosome assembly protein 4	NA
LOC110685423	K14404//cleavage and polyadenylation specificity factor subunit 4+ko03015//mRNA surveillance pathway	GO:0097159//organic cyclic compound binding;GO:0046872//metal ion binding;GO:0003676//nucleic acid binding;GO:1901363//heterocyclic compound binding;GO:0043169//cation binding;GO:0043167//ion binding;GO:0003723//RNA binding;GO:0005488//binding;
LOC110731465	K17362//acyl-coenzyme A thioesterase 13 [EC:3.1.2.-]	NA
LOC110719477	K04733//interleukin-1 receptor-associated kinase 4 [EC:2.7.11.1]	NA
LOC110728790	K02918//large subunit ribosomal protein L35e+ko03010//Ribosome	GO:0034641//cellular nitrogen compound metabolic process;GO:0043043//peptide biosynthetic process;GO:0006518//peptide metabolic process;GO:0009987//cellular process;GO:0006412//translation;GO:0043604//amide biosynthetic process;GO:0010467//gene expression;GO:0009059//macromolecule biosynthetic process;GO:0008152//metabolic process;GO:0009058//biosynthetic process;GO:1901566//organonitrogen compou…
LOC110706845	K11423//histone-lysine N-methyltransferase SETD2 [EC:2.1.1.43]+ko00310//Lysine degradation	NA
LOC110707758	K08817//cell cycle related kinase [EC:2.7.11.22]	GO:0043167//ion binding;GO:0016773//phosphotransferase activity, alcohol group as acceptor;GO:0097367//carbohydrate derivative binding;GO:0004672//protein kinase activity;GO:0016740//transferase activity;GO:0036094//small molecule binding;GO:0032559//adenyl ribonucleotide binding;GO:0032553//ribonucleotide binding;GO:0043168//anion binding;GO:1901265//nucleoside phosphate binding;GO:0140096//cata…
BGI_novel_G003786	K08486//syntaxin 1B/2/3+ko04130//SNARE interactions in vesicular transport	NA
LOC110723636	K01728//pectate lyase [EC:4.2.2.2]+ko00040//Pentose and glucuronate interconversions	NA
LOC110684935	K22696//protein-lysine N-methyltransferase EEF2KMT [EC:2.1.1.-];K08857//NIMA (never in mitosis gene a)-related kinase 1/4/5 [EC:2.7.11.1];K20241//WD repeat-containing protein 44	NA
LOC110728513	K14066//geranyl diphosphate synthase [EC:2.5.1.1]+ko00900//Terpenoid backbone biosynthesis+ko01100//Metabolic pathways+ko01110//Biosynthesis of secondary metabolites;K14066//geranyl diphosphate synthase [EC:2.5.1.1]+ko00900//Terpenoid backbone biosynthesis+ko01100//Metabolic pathways+ko01110//Biosynthesis of secondary metabolites;K14066//geranyl diphosphate synthase [EC:2.5.1.1]+ko00900//Terpenoi…	GO:0044238//primary metabolic process;GO:0006629//lipid metabolic process;GO:0009987//cellular process;GO:1901576//organic substance biosynthetic process;GO:0008152//metabolic process;GO:0008299//isoprenoid biosynthetic process;GO:0071704//organic substance metabolic process;GO:0006720//isoprenoid metabolic process;GO:0044255//cellular lipid metabolic process;GO:0044249//cellular biosynthetic pro…
LOC110731360	K22989//integral membrane protein GPR137	GO:0016020//membrane;GO:0110165//cellular anatomical entity;GO:0016021//integral component of membrane;GO:0031224//intrinsic component of membrane;
LOC110714183	K14486//auxin response factor+ko04075//Plant hormone signal transduction	GO:0080090//regulation of primary metabolic process;GO:0051716//cellular response to stimulus;GO:0009719//response to endogenous stimulus;GO:0009987//cellular process;GO:0050794//regulation of cellular process;GO:0042221//response to chemical;GO:0050789//regulation of biological process;GO:0060255//regulation of macromolecule metabolic process;GO:0019219//regulation of nucleobase-containing compo…
BGI_novel_G003223	K21777//G2/mitotic-specific cyclin-B, other	GO:0033648//host intracellular membrane-bounded organelle;GO:0110165//cellular anatomical entity;GO:0043656//host intracellular region;GO:0033647//host intracellular organelle;GO:0018995//host cellular component;GO:0042025//host cell nucleus;GO:0043657//host cell;GO:0033643//host cell part;GO:0033646//host intracellular part;
LOC110733670	K02184//formin 2	NA
LOC110707798	K09419//heat shock transcription factor, other eukaryote	NA
LOC110709091	K03283//heat shock 70kDa protein 1/2/6/8+ko03040//Spliceosome+ko04144//Endocytosis+ko04141//Protein processing in endoplasmic reticulum;K17545//serine/threonine-protein kinase ULK4 [EC:2.7.11.1]	NA
LOC110706144	K03294//basic amino acid/polyamine antiporter, APA family	GO:0110165//cellular anatomical entity;GO:0031224//intrinsic component of membrane;GO:0016021//integral component of membrane;GO:0016020//membrane;GO:0005215//transporter activity;GO:0022857//transmembrane transporter activity;
LOC110683402	K00799//glutathione S-transferase [EC:2.5.1.18]+ko00480//Glutathione metabolism	NA
LOC110694382	K01303//acylaminoacyl-peptidase [EC:3.4.19.1];K00799//glutathione S-transferase [EC:2.5.1.18]+ko00480//Glutathione metabolism;K08176//MFS transporter, PHS family, inorganic phosphate transporter;K09494//T-complex protein 1 subunit beta;K03453//bile acid:Na+ symporter, BASS family	NA
BGI_novel_G001164	K03517//quinolinate synthase [EC:2.5.1.72]+ko01100//Metabolic pathways+ko00760//Nicotinate and nicotinamide metabolism;K12447//UDP-sugar pyrophosphorylase [EC:2.7.7.64]+ko00520//Amino sugar and nucleotide sugar metabolism+ko00040//Pentose and glucuronate interconversions+ko01100//Metabolic pathways+ko00052//Galactose metabolism+ko00053//Ascorbate and aldarate metabolism	NA
LOC110711248	K11423//histone-lysine N-methyltransferase SETD2 [EC:2.1.1.43]+ko00310//Lysine degradation;K11423//histone-lysine N-methyltransferase SETD2 [EC:2.1.1.43]+ko00310//Lysine degradation	NA
BGI_novel_G005003	K11498//centromeric protein E	NA
LOC110739585	K07893//Ras-related protein Rab-6A;K04733//interleukin-1 receptor-associated kinase 4 [EC:2.7.11.1]	NA
LOC110739459	K13946//auxin influx carrier (AUX1 LAX family)+ko04075//Plant hormone signal transduction	GO:0031224//intrinsic component of membrane;GO:0110165//cellular anatomical entity;GO:0016020//membrane;GO:0016021//integral component of membrane;
LOC110684633	K20642//Rho GTPase-activating protein 22/24/25;K18647//acidic leucine-rich nuclear phosphoprotein 32 family member B;K11323//histone arginine demethylase JMJD6 [EC:1.14.11.-]	NA
LOC110709707	K02183//calmodulin+ko04016//MAPK signaling pathway - plant+ko04626//Plant-pathogen interaction+ko04070//Phosphatidylinositol signaling system	NA
LOC110729680	K12811//ATP-dependent RNA helicase DDX46/PRP5 [EC:3.6.4.13]+ko03040//Spliceosome;K09566//peptidyl-prolyl isomerase G (cyclophilin G) [EC:5.2.1.8]	NA
LOC110695878	NA	GO:0019725//cellular homeostasis;GO:0065008//regulation of biological quality;GO:0042592//homeostatic process;GO:0045454//cell redox homeostasis;GO:0065007//biological regulation;GO:0050794//regulation of cellular process;GO:0050789//regulation of biological process;GO:0009987//cellular process;
LOC110725074	K14972//PAX-interacting protein 1	NA
LOC110708944	K03283//heat shock 70kDa protein 1/2/6/8+ko03040//Spliceosome+ko04144//Endocytosis+ko04141//Protein processing in endoplasmic reticulum;K04733//interleukin-1 receptor-associated kinase 4 [EC:2.7.11.1]	NA
BGI_novel_G000450	K01465//dihydroorotase [EC:3.5.2.3]+ko01100//Metabolic pathways+ko00240//Pyrimidine metabolism	GO:1901362//organic cyclic compound biosynthetic process;GO:0034641//cellular nitrogen compound metabolic process;GO:0044271//cellular nitrogen compound biosynthetic process;GO:0044249//cellular biosynthetic process;GO:1901360//organic cyclic compound metabolic process;GO:0009112//nucleobase metabolic process;GO:1901564//organonitrogen compound metabolic process;GO:0044237//cellular metabolic pro…
LOC110726490	K05643//ATP-binding cassette, subfamily A (ABC1), member 3+ko02010//ABC transporters;K05643//ATP-binding cassette, subfamily A (ABC1), member 3+ko02010//ABC transporters;K05643//ATP-binding cassette, subfamily A (ABC1), member 3+ko02010//ABC transporters	GO:0016020//membrane;GO:0110165//cellular anatomical entity;GO:0016021//integral component of membrane;GO:0031224//intrinsic component of membrane;GO:0043167//ion binding;GO:0032555//purine ribonucleotide binding;GO:0035639//purine ribonucleoside triphosphate binding;GO:0005524//ATP binding;GO:0036094//small molecule binding;GO:1901265//nucleoside phosphate binding;GO:0043168//anion binding;GO:00…
LOC110716063	K14502//protein brassinosteroid insensitive 2 [EC:2.7.11.1]+ko04075//Plant hormone signal transduction;K14502//protein brassinosteroid insensitive 2 [EC:2.7.11.1]+ko04075//Plant hormone signal transduction;K14502//protein brassinosteroid insensitive 2 [EC:2.7.11.1]+ko04075//Plant hormone signal transduction	GO:0036094//small molecule binding;GO:0005524//ATP binding;GO:0032553//ribonucleotide binding;GO:0140096//catalytic activity, acting on a protein;GO:0032555//purine ribonucleotide binding;GO:0016740//transferase activity;GO:0097367//carbohydrate derivative binding;GO:0005488//binding;GO:0097159//organic cyclic compound binding;GO:1901265//nucleoside phosphate binding;GO:0000166//nucleotide bindin…
LOC110701354	K13201//nucleolysin TIA-1/TIAR;K17710//pentatricopeptide repeat domain-containing protein 1;K17964//leucine-rich PPR motif-containing protein, mitochondrial;K17710//pentatricopeptide repeat domain-containing protein 1	NA
LOC110735904	K04733//interleukin-1 receptor-associated kinase 4 [EC:2.7.11.1]	NA
LOC110682963	NA	GO:0110165//cellular anatomical entity;GO:0016020//membrane;GO:0031224//intrinsic component of membrane;GO:0016021//integral component of membrane;
LOC110725063	K14506//jasmonic acid-amino synthetase [EC:6.3.2.52]+ko04075//Plant hormone signal transduction	NA
BGI_novel_G000236	K11274//chromosome transmission fidelity protein 4;K03231//elongation factor 1-alpha+ko03013//RNA transport	GO:0097159//organic cyclic compound binding;GO:0005488//binding;GO:0003723//RNA binding;GO:1901363//heterocyclic compound binding;GO:0003676//nucleic acid binding;
BGI_novel_G001966	K05658//ATP-binding cassette, subfamily B (MDR/TAP), member 1 [EC:7.6.2.2]+ko02010//ABC transporters	NA
LOC110736827	K09566//peptidyl-prolyl isomerase G (cyclophilin G) [EC:5.2.1.8];K09566//peptidyl-prolyl isomerase G (cyclophilin G) [EC:5.2.1.8];K09566//peptidyl-prolyl isomerase G (cyclophilin G) [EC:5.2.1.8]	NA
LOC110687909	K01193//beta-fructofuranosidase [EC:3.2.1.26]+ko01100//Metabolic pathways+ko00052//Galactose metabolism+ko00500//Starch and sucrose metabolism;K09422//transcription factor MYB, plant;K07393//glutathionyl-hydroquinone reductase [EC:1.8.5.7]	GO:0110165//cellular anatomical entity;GO:0016020//membrane;GO:0016021//integral component of membrane;GO:0031224//intrinsic component of membrane;
BGI_novel_G001507	K10955//mucin-2	GO:0016020//membrane;GO:0016021//integral component of membrane;GO:0110165//cellular anatomical entity;GO:0031224//intrinsic component of membrane;
LOC110732507	K01102//pyruvate dehydrogenase phosphatase [EC:3.1.3.43]	GO:0004721//phosphoprotein phosphatase activity;GO:0016788//hydrolase activity, acting on ester bonds;GO:0003824//catalytic activity;GO:0042578//phosphoric ester hydrolase activity;GO:0016791//phosphatase activity;GO:0140096//catalytic activity, acting on a protein;GO:0016787//hydrolase activity;GO:0004722//protein serine/threonine phosphatase activity;
LOC110711233	K12153//phenylalanine N-monooxygenase [EC:1.14.14.40]+ko00966//Glucosinolate biosynthesis+ko01110//Biosynthesis of secondary metabolites+ko00460//Cyanoamino acid metabolism+ko01210//2-Oxocarboxylic acid metabolism;K14300//nuclear pore complex protein Nup133+ko03013//RNA transport;K21596//calmodulin-binding transcription activator;K12153//phenylalanine N-monooxygenase [EC:1.14.14.40]+ko00966//Gluc…	NA
LOC110725029	K14314//nuclear pore complex protein Nup210+ko03013//RNA transport;K14314//nuclear pore complex protein Nup210+ko03013//RNA transport	GO:0016021//integral component of membrane;GO:0016020//membrane;GO:0031224//intrinsic component of membrane;GO:0110165//cellular anatomical entity;
LOC110684535	K04733//interleukin-1 receptor-associated kinase 4 [EC:2.7.11.1]	GO:0016021//integral component of membrane;GO:0110165//cellular anatomical entity;GO:0016020//membrane;GO:0031224//intrinsic component of membrane;GO:0005509//calcium ion binding;GO:0016772//transferase activity, transferring phosphorus-containing groups;GO:0032559//adenyl ribonucleotide binding;GO:0030554//adenyl nucleotide binding;GO:0032553//ribonucleotide binding;GO:0004674//protein serine/th…
LOC110719716	K14486//auxin response factor+ko04075//Plant hormone signal transduction;K14486//auxin response factor+ko04075//Plant hormone signal transduction	GO:0009755//hormone-mediated signaling pathway;GO:0071365//cellular response to auxin stimulus;GO:0071310//cellular response to organic substance;GO:0071495//cellular response to endogenous stimulus;GO:0010468//regulation of gene expression;GO:0070887//cellular response to chemical stimulus;GO:0042221//response to chemical;GO:0019222//regulation of metabolic process;GO:2001141//regulation of RNA …
LOC110692678	K03327//multidrug resistance protein, MATE family	GO:0031224//intrinsic component of membrane;GO:0016020//membrane;GO:0016021//integral component of membrane;GO:0110165//cellular anatomical entity;GO:0022804//active transmembrane transporter activity;GO:0022857//transmembrane transporter activity;GO:0015291//secondary active transmembrane transporter activity;GO:0042910//xenobiotic transmembrane transporter activity;GO:0015297//antiporter activi…
LOC110729601	K13091//RNA-binding protein 39;K13195//cold-inducible RNA-binding protein;K13126//polyadenylate-binding protein+ko03015//mRNA surveillance pathway+ko03018//RNA degradation+ko03013//RNA transport	GO:1901363//heterocyclic compound binding;GO:0097159//organic cyclic compound binding;GO:0003676//nucleic acid binding;GO:0005488//binding;GO:0003723//RNA binding;
LOC110718893	K11498//centromeric protein E;K11498//centromeric protein E	NA
LOC110695328	K21952//CASK-interacting protein	GO:0031224//intrinsic component of membrane;GO:0110165//cellular anatomical entity;GO:0016020//membrane;GO:0016021//integral component of membrane;GO:0043168//anion binding;GO:0032559//adenyl ribonucleotide binding;GO:0000166//nucleotide binding;GO:0016773//phosphotransferase activity, alcohol group as acceptor;GO:0004672//protein kinase activity;GO:0005524//ATP binding;GO:0003824//catalytic acti…
LOC110682751	K17604//zinc finger SWIM domain-containing protein 3	NA
BGI_novel_G004885	K19944//TBC1 domain family member 10	GO:0032259//methylation;GO:0008152//metabolic process;GO:0031224//intrinsic component of membrane;GO:0098791//Golgi apparatus subcompartment;GO:0031982//vesicle;GO:0005737//cytoplasm;GO:0097708//intracellular vesicle;GO:0110165//cellular anatomical entity;GO:0043231//intracellular membrane-bounded organelle;GO:0012505//endomembrane system;GO:0005622//intracellular;GO:0043227//membrane-bounded org…
LOC110720552	K03549//KUP system potassium uptake protein	NA
LOC110691303	K00102//D-lactate dehydrogenase (cytochrome) [EC:1.1.2.4]+ko00620//Pyruvate metabolism;K19525//vacuolar protein sorting-associated protein 13A/C;K12396//AP-3 complex subunit delta;K10756//replication factor C subunit 3/5+ko03420//Nucleotide excision repair+ko03030//DNA replication+ko03430//Mismatch repair;K05665//ATP-binding cassette, subfamily C (CFTR/MRP), member 1 [EC:7.6.2.3]+ko02010//ABC tra…	NA
LOC110701903	K08867//WNK lysine deficient protein kinase [EC:2.7.11.1]	GO:0043167//ion binding;GO:0043168//anion binding;GO:0035639//purine ribonucleoside triphosphate binding;GO:0016740//transferase activity;GO:1901265//nucleoside phosphate binding;GO:0097159//organic cyclic compound binding;GO:0030554//adenyl nucleotide binding;GO:0036094//small molecule binding;GO:0016773//phosphotransferase activity, alcohol group as acceptor;GO:0004672//protein kinase activity;…
LOC110724866	K06001//tryptophan synthase beta chain [EC:4.2.1.20]+ko01230//Biosynthesis of amino acids+ko01100//Metabolic pathways+ko01110//Biosynthesis of secondary metabolites+ko00260//Glycine, serine and threonine metabolism+ko00400//Phenylalanine, tyrosine and tryptophan biosynthesis	GO:0110165//cellular anatomical entity;GO:0016020//membrane;GO:0016021//integral component of membrane;GO:0031224//intrinsic component of membrane;GO:0019842//vitamin binding;GO:1901363//heterocyclic compound binding;GO:0070279//vitamin B6 binding;GO:0043167//ion binding;GO:0016836//hydro-lyase activity;GO:0016835//carbon-oxygen lyase activity;GO:0003824//catalytic activity;GO:0036094//small mole…
LOC110730840	K20347//p24 family protein beta-1	GO:0005737//cytoplasm;GO:0110165//cellular anatomical entity;GO:0031982//vesicle;GO:0005622//intracellular;GO:0005798//Golgi-associated vesicle;GO:0031090//organelle membrane;GO:0016020//membrane;GO:0097708//intracellular vesicle;GO:0012505//endomembrane system;GO:0043226//organelle;GO:0030135//coated vesicle;GO:0005794//Golgi apparatus;GO:0005789//endoplasmic reticulum membrane;GO:0043231//intra…
LOC110687615	K01206//alpha-L-fucosidase [EC:3.2.1.51]+ko00511//Other glycan degradation;K10396//kinesin family member 5+ko04144//Endocytosis	NA
LOC110722855	K17604//zinc finger SWIM domain-containing protein 3	NA
LOC110722442	K15083//DNA repair protein RAD16	NA
LOC110725579	K01824//cholestenol Delta-isomerase [EC:5.3.3.5]+ko01100//Metabolic pathways+ko01110//Biosynthesis of secondary metabolites+ko00100//Steroid biosynthesis	NA
BGI_novel_G004380	K13457//disease resistance protein RPM1+ko04626//Plant-pathogen interaction	GO:0050896//response to stimulus;GO:0006952//defense response;GO:0006950//response to stress;GO:1901265//nucleoside phosphate binding;GO:0032555//purine ribonucleotide binding;GO:0005524//ATP binding;GO:0035639//purine ribonucleoside triphosphate binding;GO:0017076//purine nucleotide binding;GO:0043168//anion binding;GO:0005488//binding;GO:1901363//heterocyclic compound binding;GO:0032553//ribonu…
LOC110739638	K17604//zinc finger SWIM domain-containing protein 3	NA
BGI_novel_G003601	K00873//pyruvate kinase [EC:2.7.1.40]+ko00010//Glycolysis / Gluconeogenesis+ko00230//Purine metabolism+ko01230//Biosynthesis of amino acids+ko01100//Metabolic pathways+ko01110//Biosynthesis of secondary metabolites+ko00620//Pyruvate metabolism+ko01200//Carbon metabolism	GO:0009117//nucleotide metabolic process;GO:0009132//nucleoside diphosphate metabolic process;GO:0044281//small molecule metabolic process;GO:0006096//glycolytic process;GO:0005975//carbohydrate metabolic process;GO:0006757//ATP generation from ADP;GO:0006753//nucleoside phosphate metabolic process;GO:0009056//catabolic process;GO:1901360//organic cyclic compound metabolic process;GO:0044238//pri…
LOC110713037	K14806//ATP-dependent RNA helicase DDX31/DBP7 [EC:3.6.4.13];K14806//ATP-dependent RNA helicase DDX31/DBP7 [EC:3.6.4.13]	GO:0043226//organelle;GO:0005737//cytoplasm;GO:0005622//intracellular;GO:0110165//cellular anatomical entity;GO:0009536//plastid;GO:0043231//intracellular membrane-bounded organelle;GO:0043227//membrane-bounded organelle;GO:0043229//intracellular organelle;GO:0009507//chloroplast;GO:0005524//ATP binding;GO:1901265//nucleoside phosphate binding;GO:0035639//purine ribonucleoside triphosphate bindin…
LOC110699555	K01056//peptidyl-tRNA hydrolase, PTH1 family [EC:3.1.1.29];K01056//peptidyl-tRNA hydrolase, PTH1 family [EC:3.1.1.29];K01183//chitinase [EC:3.2.1.14]+ko00520//Amino sugar and nucleotide sugar metabolism+ko01100//Metabolic pathways;K01881//prolyl-tRNA synthetase [EC:6.1.1.15]+ko00970//Aminoacyl-tRNA biosynthesis;K13459//disease resistance protein RPS2+ko04626//Plant-pathogen interaction	NA
LOC110702356	K13424//WRKY transcription factor 33+ko04016//MAPK signaling pathway - plant+ko04626//Plant-pathogen interaction	GO:0005622//intracellular;GO:0110165//cellular anatomical entity;GO:0043229//intracellular organelle;GO:0043227//membrane-bounded organelle;GO:0043226//organelle;GO:0005634//nucleus;GO:0043231//intracellular membrane-bounded organelle;GO:0005488//binding;GO:0003677//DNA binding;GO:0097159//organic cyclic compound binding;GO:1901363//heterocyclic compound binding;GO:0043565//sequence-specific DNA …
LOC110714653	K20556//cytochrome P450 family 76 subfamily C	GO:0004497//monooxygenase activity;GO:0020037//heme binding;GO:0046914//transition metal ion binding;GO:0016491//oxidoreductase activity;GO:0005506//iron ion binding;GO:0046906//tetrapyrrole binding;GO:0046872//metal ion binding;GO:0003824//catalytic activity;GO:0097159//organic cyclic compound binding;GO:0043167//ion binding;GO:1901363//heterocyclic compound binding;GO:0005488//binding;GO:004316…
LOC110703353	K06911//uncharacterized protein;K11843//ubiquitin carboxyl-terminal hydrolase 14 [EC:3.4.19.12]	NA
BGI_novel_G003736	K10844//DNA excision repair protein ERCC-2 [EC:3.6.4.12]+ko03420//Nucleotide excision repair+ko03022//Basal transcription factors	GO:0044238//primary metabolic process;GO:0006725//cellular aromatic compound metabolic process;GO:0008152//metabolic process;GO:0006289//nucleotide-excision repair;GO:0044260//cellular macromolecule metabolic process;GO:0006139//nucleobase-containing compound metabolic process;GO:0044237//cellular metabolic process;GO:0050896//response to stimulus;GO:0006281//DNA repair;GO:0006259//DNA metabolic …
LOC110729594	K04733//interleukin-1 receptor-associated kinase 4 [EC:2.7.11.1]	GO:0140096//catalytic activity, acting on a protein;GO:0097367//carbohydrate derivative binding;GO:1901363//heterocyclic compound binding;GO:0003824//catalytic activity;GO:0004672//protein kinase activity;GO:0043167//ion binding;GO:0032559//adenyl ribonucleotide binding;GO:0032555//purine ribonucleotide binding;GO:0019787//ubiquitin-like protein transferase activity;GO:0032553//ribonucleotide bin…
LOC110715923	K15263//cell growth-regulating nucleolar protein	GO:1901363//heterocyclic compound binding;GO:0003677//DNA binding;GO:0003676//nucleic acid binding;GO:0097159//organic cyclic compound binding;GO:0005488//binding;
LOC110729948	K02925//large subunit ribosomal protein L3e+ko03010//Ribosome;K12524//bifunctional aspartokinase / homoserine dehydrogenase 1 [EC:2.7.2.4 1.1.1.3]+ko00300//Lysine biosynthesis+ko01230//Biosynthesis of amino acids+ko01100//Metabolic pathways+ko01110//Biosynthesis of secondary metabolites+ko00261//Monobactam biosynthesis+ko00260//Glycine, serine and threonine metabolism+ko00270//Cysteine and methio…	NA
BGI_novel_G003761	K02130//F-type H+-transporting ATPase subunit f+ko01100//Metabolic pathways+ko00190//Oxidative phosphorylation	NA
BGI_novel_G004984	K00021//hydroxymethylglutaryl-CoA reductase (NADPH) [EC:1.1.1.34]+ko00900//Terpenoid backbone biosynthesis+ko01100//Metabolic pathways+ko01110//Biosynthesis of secondary metabolites	GO:0044249//cellular biosynthetic process;GO:0006725//cellular aromatic compound metabolic process;GO:0044238//primary metabolic process;GO:0044237//cellular metabolic process;GO:0034641//cellular nitrogen compound metabolic process;GO:0006796//phosphate-containing compound metabolic process;GO:0055086//nucleobase-containing small molecule metabolic process;GO:0033865//nucleoside bisphosphate met…
LOC110724492	K15255//ATP-dependent DNA helicase PIF1 [EC:3.6.4.12];K07466//replication factor A1+ko03420//Nucleotide excision repair+ko03030//DNA replication+ko03440//Homologous recombination+ko03430//Mismatch repair	NA
LOC110695849	K02925//large subunit ribosomal protein L3e+ko03010//Ribosome;K12524//bifunctional aspartokinase / homoserine dehydrogenase 1 [EC:2.7.2.4 1.1.1.3]+ko00300//Lysine biosynthesis+ko01230//Biosynthesis of amino acids+ko01100//Metabolic pathways+ko01110//Biosynthesis of secondary metabolites+ko00261//Monobactam biosynthesis+ko00260//Glycine, serine and threonine metabolism+ko00270//Cysteine and methio…	NA
LOC110685614	K13448//calcium-binding protein CML+ko04626//Plant-pathogen interaction	GO:0046872//metal ion binding;GO:0005509//calcium ion binding;GO:0043169//cation binding;GO:0005488//binding;GO:0043167//ion binding;
LOC110715760	K01530//phospholipid-translocating ATPase [EC:7.6.2.1];K00815//tyrosine aminotransferase [EC:2.6.1.5]+ko00130//Ubiquinone and other terpenoid-quinone biosynthesis+ko01230//Biosynthesis of amino acids+ko00960//Tropane, piperidine and pyridine alkaloid biosynthesis+ko00350//Tyrosine metabolism+ko01100//Metabolic pathways+ko00950//Isoquinoline alkaloid biosynthesis+ko01110//Biosynthesis of secondary…	NA
LOC110705481	K17500//integrin-linked kinase-associated serine/threonine phosphatase 2C [EC:3.1.3.16];K20776//BRISC and BRCA1-A complex member 1+ko03440//Homologous recombination;K17500//integrin-linked kinase-associated serine/threonine phosphatase 2C [EC:3.1.3.16];K17506//protein phosphatase 1L [EC:3.1.3.16];K17500//integrin-linked kinase-associated serine/threonine phosphatase 2C [EC:3.1.3.16];K20776//BRISC…	GO:0004721//phosphoprotein phosphatase activity;GO:0016787//hydrolase activity;GO:0003824//catalytic activity;GO:0140096//catalytic activity, acting on a protein;GO:0004722//protein serine/threonine phosphatase activity;GO:0016791//phosphatase activity;GO:0016788//hydrolase activity, acting on ester bonds;GO:0042578//phosphoric ester hydrolase activity;
LOC110718102	K09422//transcription factor MYB, plant	GO:0043231//intracellular membrane-bounded organelle;GO:0110165//cellular anatomical entity;GO:0043227//membrane-bounded organelle;GO:0043229//intracellular organelle;GO:0005634//nucleus;GO:0005622//intracellular;GO:0043226//organelle;GO:0097159//organic cyclic compound binding;GO:0003677//DNA binding;GO:1901363//heterocyclic compound binding;GO:0005488//binding;GO:0003676//nucleic acid binding;
LOC110712612	K03217//YidC/Oxa1 family membrane protein insertase+ko03060//Protein export	GO:0016021//integral component of membrane;GO:0110165//cellular anatomical entity;GO:0016020//membrane;GO:0031224//intrinsic component of membrane;GO:0032977//membrane insertase activity;GO:0140104//molecular carrier activity;
LOC110712196	K03301//ATP:ADP antiporter, AAA family;K21867//potassium channel;K03301//ATP:ADP antiporter, AAA family;K21867//potassium channel	NA
LOC110737209	K18835//WRKY transcription factor 2+ko04626//Plant-pathogen interaction	GO:0005622//intracellular;GO:0110165//cellular anatomical entity;GO:0043226//organelle;GO:0043227//membrane-bounded organelle;GO:0005634//nucleus;GO:0043229//intracellular organelle;GO:0043231//intracellular membrane-bounded organelle;GO:0140110//transcription regulator activity;GO:0005488//binding;GO:0003677//DNA binding;GO:0043565//sequence-specific DNA binding;GO:1901363//heterocyclic compound…
LOC110733384	K04733//interleukin-1 receptor-associated kinase 4 [EC:2.7.11.1]	GO:0016021//integral component of membrane;GO:0031224//intrinsic component of membrane;GO:0016020//membrane;GO:0110165//cellular anatomical entity;GO:0030246//carbohydrate binding;GO:0005488//binding;
LOC110711624	K19613//leucine-rich repeat protein SHOC2;K15078//structure-specific endonuclease subunit SLX1 [EC:3.6.1.-];K19613//leucine-rich repeat protein SHOC2;K15078//structure-specific endonuclease subunit SLX1 [EC:3.6.1.-];K19613//leucine-rich repeat protein SHOC2;K15078//structure-specific endonuclease subunit SLX1 [EC:3.6.1.-]	NA
LOC110724058	K12524//bifunctional aspartokinase / homoserine dehydrogenase 1 [EC:2.7.2.4 1.1.1.3]+ko00300//Lysine biosynthesis+ko01230//Biosynthesis of amino acids+ko01100//Metabolic pathways+ko01110//Biosynthesis of secondary metabolites+ko00261//Monobactam biosynthesis+ko00260//Glycine, serine and threonine metabolism+ko00270//Cysteine and methionine metabolism;K13754//solute carrier family 24 (sodium/potas…	NA
LOC110727531	K13448//calcium-binding protein CML+ko04626//Plant-pathogen interaction	GO:0046872//metal ion binding;GO:0043169//cation binding;GO:0005488//binding;GO:0005509//calcium ion binding;GO:0043167//ion binding;
LOC110731046	K02976//small subunit ribosomal protein S26e+ko03010//Ribosome	GO:0019538//protein metabolic process;GO:0043603//cellular amide metabolic process;GO:0006412//translation;GO:0006518//peptide metabolic process;GO:0010467//gene expression;GO:0034645//cellular macromolecule biosynthetic process;GO:0071704//organic substance metabolic process;GO:0044249//cellular biosynthetic process;GO:1901576//organic substance biosynthetic process;GO:0009987//cellular process;…
LOC110718249	NA	GO:0022402//cell cycle process;GO:0007142//male meiosis II;GO:0071840//cellular component organization or biogenesis;GO:0019953//sexual reproduction;GO:0140013//meiotic nuclear division;GO:0007276//gamete generation;GO:0007140//male meiotic nuclear division;GO:0048232//male gamete generation;GO:0032504//multicellular organism reproduction;GO:0051321//meiotic cell cycle;GO:1903046//meiotic cell cy…
LOC110690250	K15078//structure-specific endonuclease subunit SLX1 [EC:3.6.1.-]	NA
LOC110709827	NA	GO:0110165//cellular anatomical entity;GO:0031224//intrinsic component of membrane;GO:0016020//membrane;GO:0016021//integral component of membrane;
LOC110732080	K11131//H/ACA ribonucleoprotein complex subunit 4 [EC:5.4.99.-]+ko03008//Ribosome biogenesis in eukaryotes;K11131//H/ACA ribonucleoprotein complex subunit 4 [EC:5.4.99.-]+ko03008//Ribosome biogenesis in eukaryotes;K11131//H/ACA ribonucleoprotein complex subunit 4 [EC:5.4.99.-]+ko03008//Ribosome biogenesis in eukaryotes;K11131//H/ACA ribonucleoprotein complex subunit 4 [EC:5.4.99.-]+ko03008//Ribos…	NA
LOC110695196	K13169//splicing factor, arginine/serine-rich 17;K13169//splicing factor, arginine/serine-rich 17	NA
LOC110707311	K03124//transcription initiation factor TFIIB+ko03022//Basal transcription factors	GO:0019438//aromatic compound biosynthetic process;GO:0043933//protein-containing complex subunit organization;GO:0050789//regulation of biological process;GO:0071704//organic substance metabolic process;GO:0070897//transcription preinitiation complex assembly;GO:0034641//cellular nitrogen compound metabolic process;GO:0032774//RNA biosynthetic process;GO:0044238//primary metabolic process;GO:001…
LOC110704297	K09350//homeobox protein Nkx-6.2;K09338//homeobox-leucine zipper protein	NA
LOC110710362	K13944//LOB domain-containing protein 16	NA
LOC110695091	K11816//indole-3-pyruvate monooxygenase [EC:1.14.13.168]+ko00380//Tryptophan metabolism+ko01100//Metabolic pathways	GO:0008104//protein localization;GO:0090151//establishment of protein localization to mitochondrial membrane;GO:0007008//outer mitochondrial membrane organization;GO:0051179//localization;GO:0033036//macromolecule localization;GO:0006839//mitochondrial transport;GO:0072657//protein localization to membrane;GO:0015031//protein transport;GO:0042886//amide transport;GO:0007006//mitochondrial membran…
BGI_novel_G001994	K10457//kelch-like protein 20	NA
LOC110736671	NA	GO:0110165//cellular anatomical entity;GO:0016021//integral component of membrane;GO:0031224//intrinsic component of membrane;GO:0016020//membrane;
LOC110714839	K19613//leucine-rich repeat protein SHOC2;K14497//protein phosphatase 2C [EC:3.1.3.16]+ko04016//MAPK signaling pathway - plant+ko04075//Plant hormone signal transduction;K17609//nucleoredoxin [EC:1.8.1.8]	NA
LOC110712437	K02325//DNA polymerase epsilon subunit 2 [EC:2.7.7.7]+ko03420//Nucleotide excision repair+ko03030//DNA replication+ko03410//Base excision repair;K02325//DNA polymerase epsilon subunit 2 [EC:2.7.7.7]+ko03420//Nucleotide excision repair+ko03030//DNA replication+ko03410//Base excision repair	NA
LOC110705723	K06066//CBF1 interacting corepressor	NA
LOC110725158	K01087//trehalose 6-phosphate phosphatase [EC:3.1.3.12]+ko01100//Metabolic pathways+ko00500//Starch and sucrose metabolism;K01087//trehalose 6-phosphate phosphatase [EC:3.1.3.12]+ko01100//Metabolic pathways+ko00500//Starch and sucrose metabolism;K01087//trehalose 6-phosphate phosphatase [EC:3.1.3.12]+ko01100//Metabolic pathways+ko00500//Starch and sucrose metabolism	GO:0008152//metabolic process;GO:0009312//oligosaccharide biosynthetic process;GO:0009058//biosynthetic process;GO:1901576//organic substance biosynthetic process;GO:0005991//trehalose metabolic process;GO:0071704//organic substance metabolic process;GO:0009987//cellular process;GO:0044237//cellular metabolic process;GO:0044262//cellular carbohydrate metabolic process;GO:0044238//primary metaboli…
LOC110703741	K00868//pyridoxine kinase [EC:2.7.1.35]+ko00750//Vitamin B6 metabolism+ko01100//Metabolic pathways	NA
LOC110722880	K10395//kinesin family member 4/21/27	GO:0006928//movement of cell or subcellular component;GO:0007018//microtubule-based movement;GO:0009987//cellular process;GO:0007017//microtubule-based process;GO:0003777//microtubule motor activity;GO:0030554//adenyl nucleotide binding;GO:0016787//hydrolase activity;GO:0036094//small molecule binding;GO:0005488//binding;GO:0032559//adenyl ribonucleotide binding;GO:0097159//organic cyclic compoun…
LOC110686902	K00026//malate dehydrogenase [EC:1.1.1.37]+ko00020//Citrate cycle (TCA cycle)+ko01100//Metabolic pathways+ko01110//Biosynthesis of secondary metabolites+ko00710//Carbon fixation in photosynthetic organisms+ko00620//Pyruvate metabolism+ko00270//Cysteine and methionine metabolism+ko01200//Carbon metabolism+ko00630//Glyoxylate and dicarboxylate metabolism	GO:0006108//malate metabolic process;GO:0008152//metabolic process;GO:0006082//organic acid metabolic process;GO:0043436//oxoacid metabolic process;GO:0043648//dicarboxylic acid metabolic process;GO:0006099//tricarboxylic acid cycle;GO:0019752//carboxylic acid metabolic process;GO:0005975//carbohydrate metabolic process;GO:0015980//energy derivation by oxidation of organic compounds;GO:0009060//a…
LOC110736249	K01177//beta-amylase [EC:3.2.1.2]+ko00500//Starch and sucrose metabolism	GO:0016052//carbohydrate catabolic process;GO:0000272//polysaccharide catabolic process;GO:0009056//catabolic process;GO:0009057//macromolecule catabolic process;GO:0071704//organic substance metabolic process;GO:0008152//metabolic process;GO:0043170//macromolecule metabolic process;GO:0005975//carbohydrate metabolic process;GO:1901575//organic substance catabolic process;GO:0044238//primary meta…
BGI_novel_G005354	K04733//interleukin-1 receptor-associated kinase 4 [EC:2.7.11.1]	NA
LOC110712329	K01082//3'(2'), 5'-bisphosphate nucleotidase [EC:3.1.3.7]+ko00920//Sulfur metabolism+ko01100//Metabolic pathways	GO:0003824//catalytic activity;GO:0016787//hydrolase activity;
LOC110687635	K15356//GDP-mannose transporter	GO:0031224//intrinsic component of membrane;GO:0016021//integral component of membrane;GO:0016020//membrane;GO:0110165//cellular anatomical entity;
BGI_novel_G001946	K10400//kinesin family member 15	NA
BGI_novel_G003286	K09422//transcription factor MYB, plant;K09420//transcriptional activator Myb	NA
LOC110688490	NA	GO:0008289//lipid binding;GO:0005488//binding;
LOC110724923	K19613//leucine-rich repeat protein SHOC2;K19613//leucine-rich repeat protein SHOC2;K19613//leucine-rich repeat protein SHOC2;K19613//leucine-rich repeat protein SHOC2;K19613//leucine-rich repeat protein SHOC2	NA
LOC110702442	K22794//flavonol-3-O-glucoside/galactoside glucosyltransferase [EC:2.4.1.239 2.4.1.-]+ko00944//Flavone and flavonol biosynthesis	GO:0016757//transferase activity, transferring glycosyl groups;GO:0016758//transferase activity, transferring hexosyl groups;GO:0003824//catalytic activity;GO:0016740//transferase activity;
LOC110735702	K06671//cohesin complex subunit SA-1/2	NA
BGI_novel_G001181	K18162//NADH dehydrogenase [ubiquinone] 1 alpha subcomplex assembly factor 5 [EC:2.1.1.-]	GO:0003824//catalytic activity;GO:0016740//transferase activity;GO:0016741//transferase activity, transferring one-carbon groups;GO:0008168//methyltransferase activity;
LOC110694369	K04460//serine/threonine-protein phosphatase 5 [EC:3.1.3.16];K00134//glyceraldehyde 3-phosphate dehydrogenase [EC:1.2.1.12]+ko00010//Glycolysis / Gluconeogenesis+ko01230//Biosynthesis of amino acids+ko01100//Metabolic pathways+ko01110//Biosynthesis of secondary metabolites+ko00710//Carbon fixation in photosynthetic organisms+ko01200//Carbon metabolism;K12448//UDP-arabinose 4-epimerase [EC:5.1.3.5…	NA
LOC110711284	K07478//putative ATPase;K01303//acylaminoacyl-peptidase [EC:3.4.19.1];K15718//linoleate 9S-lipoxygenase [EC:1.13.11.58]+ko00591//Linoleic acid metabolism;K08775//breast cancer 2 susceptibility protein+ko03440//Homologous recombination;K12472//epidermal growth factor receptor substrate 15+ko04144//Endocytosis	NA
BGI_novel_G005208	K14677//aminoacylase [EC:3.5.1.14]+ko00220//Arginine biosynthesis+ko01230//Biosynthesis of amino acids+ko01100//Metabolic pathways+ko01110//Biosynthesis of secondary metabolites+ko01210//2-Oxocarboxylic acid metabolism	GO:0006807//nitrogen compound metabolic process;GO:0009987//cellular process;GO:0006082//organic acid metabolic process;GO:0043436//oxoacid metabolic process;GO:0008152//metabolic process;GO:1901564//organonitrogen compound metabolic process;GO:0071704//organic substance metabolic process;GO:0044237//cellular metabolic process;GO:0044281//small molecule metabolic process;GO:0019752//carboxylic ac…
LOC110693984	K08241//jasmonate O-methyltransferase [EC:2.1.1.141]+ko00592//alpha-Linolenic acid metabolism+ko01110//Biosynthesis of secondary metabolites	GO:0003824//catalytic activity;GO:0016740//transferase activity;GO:0016741//transferase activity, transferring one-carbon groups;GO:0008168//methyltransferase activity;
LOC110713799	K01772//protoporphyrin/coproporphyrin ferrochelatase [EC:4.99.1.1 4.99.1.9]+ko00860//Porphyrin and chlorophyll metabolism+ko01100//Metabolic pathways+ko01110//Biosynthesis of secondary metabolites	NA
BGI_novel_G004113	K10520//ankyrin repeat and BTB/POZ domain-containing protein 1	NA
LOC110711340	K07407//alpha-galactosidase [EC:3.2.1.22]+ko00603//Glycosphingolipid biosynthesis - globo and isoglobo series+ko00600//Sphingolipid metabolism+ko01100//Metabolic pathways+ko00052//Galactose metabolism+ko00561//Glycerolipid metabolism	NA
LOC110723180	K09874//aquaporin NIP	GO:0016021//integral component of membrane;GO:0110165//cellular anatomical entity;GO:0031224//intrinsic component of membrane;GO:0016020//membrane;GO:0005215//transporter activity;GO:0022857//transmembrane transporter activity;GO:0015267//channel activity;GO:0022803//passive transmembrane transporter activity;
LOC110729160	K17535//serine/threonine-protein kinase TNNI3K [EC:2.7.11.1];K10443//kelch-like protein 2/3;K17535//serine/threonine-protein kinase TNNI3K [EC:2.7.11.1];K10443//kelch-like protein 2/3;K17535//serine/threonine-protein kinase TNNI3K [EC:2.7.11.1];K10443//kelch-like protein 2/3	NA
LOC110697824	K14963//COMPASS component SWD3;K03362//F-box and WD-40 domain protein 1/11+ko04120//Ubiquitin mediated proteolysis;K16794//platelet-activating factor acetylhydrolase IB subunit alpha+ko01100//Metabolic pathways+ko00565//Ether lipid metabolism	NA
BGI_novel_G002186	K06067//histone deacetylase 1/2 [EC:3.5.1.98]	GO:1902679//negative regulation of RNA biosynthetic process;GO:0044764//multi-organism cellular process;GO:0009605//response to external stimulus;GO:0019538//protein metabolic process;GO:0009987//cellular process;GO:0044237//cellular metabolic process;GO:0043170//macromolecule metabolic process;GO:0050794//regulation of cellular process;GO:0031323//regulation of cellular metabolic process;GO:0051…
LOC110723786	K17604//zinc finger SWIM domain-containing protein 3	NA
LOC110711752	K11323//histone arginine demethylase JMJD6 [EC:1.14.11.-];K11323//histone arginine demethylase JMJD6 [EC:1.14.11.-]	GO:0048588//developmental cell growth;GO:0071704//organic substance metabolic process;GO:0032502//developmental process;GO:0009653//anatomical structure morphogenesis;GO:0000003//reproduction;GO:0048589//developmental growth;GO:0016049//cell growth;GO:1901135//carbohydrate derivative metabolic process;GO:0019760//glucosinolate metabolic process;GO:0048868//pollen tube development;GO:0016143//S-gl…
LOC110725343	K15849//bifunctional aspartate aminotransferase and glutamate/aspartate-prephenate aminotransferase [EC:2.6.1.1 2.6.1.78 2.6.1.79]+ko01230//Biosynthesis of amino acids+ko00960//Tropane, piperidine and pyridine alkaloid biosynthesis+ko00350//Tyrosine metabolism+ko01100//Metabolic pathways+ko00950//Isoquinoline alkaloid biosynthesis+ko01110//Biosynthesis of secondary metabolites+ko00400//Phenylalan…	GO:0008152//metabolic process;GO:0009058//biosynthetic process;GO:0036094//small molecule binding;GO:0043167//ion binding;GO:1901363//heterocyclic compound binding;GO:0043168//anion binding;GO:0019842//vitamin binding;GO:0070279//vitamin B6 binding;GO:0030170//pyridoxal phosphate binding;GO:0005488//binding;GO:0097159//organic cyclic compound binding;GO:0003824//catalytic activity;
BGI_novel_G002633	K09419//heat shock transcription factor, other eukaryote	NA
LOC110683054	K03787//5'-nucleotidase [EC:3.1.3.5]+ko00230//Purine metabolism+ko01100//Metabolic pathways+ko00760//Nicotinate and nicotinamide metabolism+ko01110//Biosynthesis of secondary metabolites+ko00240//Pyrimidine metabolism	GO:0016791//phosphatase activity;GO:0042578//phosphoric ester hydrolase activity;GO:0016788//hydrolase activity, acting on ester bonds;GO:0016787//hydrolase activity;GO:0003824//catalytic activity;GO:0008252//nucleotidase activity;
LOC110707671	K13463//coronatine-insensitive protein 1+ko04075//Plant hormone signal transduction;K13463//coronatine-insensitive protein 1+ko04075//Plant hormone signal transduction;K13463//coronatine-insensitive protein 1+ko04075//Plant hormone signal transduction;K13463//coronatine-insensitive protein 1+ko04075//Plant hormone signal transduction	NA
LOC110705801	K04079//molecular chaperone HtpG+ko04141//Protein processing in endoplasmic reticulum+ko04626//Plant-pathogen interaction;K15030//translation initiation factor 3 subunit M	NA
BGI_novel_G004795	K01188//beta-glucosidase [EC:3.2.1.21]+ko01100//Metabolic pathways+ko00500//Starch and sucrose metabolism+ko01110//Biosynthesis of secondary metabolites+ko00460//Cyanoamino acid metabolism+ko00940//Phenylpropanoid biosynthesis;K22804//structural maintenance of chromosomes protein 6	GO:0004519//endonuclease activity;GO:0004540//ribonuclease activity;GO:0004518//nuclease activity;GO:0034061//DNA polymerase activity;GO:0003964//RNA-directed DNA polymerase activity;GO:0140097//catalytic activity, acting on DNA;GO:0003824//catalytic activity;GO:0003676//nucleic acid binding;GO:0140098//catalytic activity, acting on RNA;GO:0016779//nucleotidyltransferase activity;GO:0097159//orga…
LOC110696914	K11294//nucleolin;K17046//protein DEK	NA
LOC110710711	K01784//UDP-glucose 4-epimerase [EC:5.1.3.2]+ko00520//Amino sugar and nucleotide sugar metabolism+ko01100//Metabolic pathways+ko00052//Galactose metabolism;K01784//UDP-glucose 4-epimerase [EC:5.1.3.2]+ko00520//Amino sugar and nucleotide sugar metabolism+ko01100//Metabolic pathways+ko00052//Galactose metabolism;K01784//UDP-glucose 4-epimerase [EC:5.1.3.2]+ko00520//Amino sugar and nucleotide sugar …	NA
LOC110699333	K01227//mannosyl-glycoprotein endo-beta-N-acetylglucosaminidase [EC:3.2.1.96]+ko00511//Other glycan degradation;K01227//mannosyl-glycoprotein endo-beta-N-acetylglucosaminidase [EC:3.2.1.96]+ko00511//Other glycan degradation;K01227//mannosyl-glycoprotein endo-beta-N-acetylglucosaminidase [EC:3.2.1.96]+ko00511//Other glycan degradation;K01227//mannosyl-glycoprotein endo-beta-N-acetylglucosaminidase…	GO:0005737//cytoplasm;GO:0110165//cellular anatomical entity;GO:0005622//intracellular;GO:0033925//mannosyl-glycoprotein endo-beta-N-acetylglucosaminidase activity;GO:0016787//hydrolase activity;GO:0016798//hydrolase activity, acting on glycosyl bonds;GO:0004553//hydrolase activity, hydrolyzing O-glycosyl compounds;GO:0003824//catalytic activity;
LOC110724621	K10352//myosin heavy chain;K10352//myosin heavy chain	NA
BGI_novel_G000659	K14611//solute carrier family 23 (nucleobase transporter), member 1/2	GO:0016020//membrane;GO:0110165//cellular anatomical entity;GO:0031224//intrinsic component of membrane;GO:0016021//integral component of membrane;GO:0022857//transmembrane transporter activity;GO:0005215//transporter activity;
LOC110696542	K00232//acyl-CoA oxidase [EC:1.3.3.6]+ko04146//Peroxisome+ko00592//alpha-Linolenic acid metabolism+ko01100//Metabolic pathways+ko01110//Biosynthesis of secondary metabolites+ko01212//Fatty acid metabolism+ko01040//Biosynthesis of unsaturated fatty acids+ko00071//Fatty acid degradation;K08343//ubiquitin-like-conjugating enzyme ATG3+ko04136//Autophagy - other;K03580//ATP-dependent helicase HepA [EC…	NA
LOC110721278	K13496//UDP-glucosyl transferase 73C [EC:2.4.1.-];K22771//flavonol-3-O-L-rhamnoside-7-O-glucosyltransferase [EC:2.4.1.-]+ko00944//Flavone and flavonol biosynthesis	GO:0016740//transferase activity;GO:0003824//catalytic activity;GO:0016758//transferase activity, transferring hexosyl groups;GO:0016757//transferase activity, transferring glycosyl groups;
LOC110704416	K08286//protein-serine/threonine kinase [EC:2.7.11.-]	GO:0004672//protein kinase activity;GO:0140096//catalytic activity, acting on a protein;GO:0032553//ribonucleotide binding;GO:0005488//binding;GO:0043168//anion binding;GO:0036094//small molecule binding;GO:0005524//ATP binding;GO:0016740//transferase activity;GO:0035639//purine ribonucleoside triphosphate binding;GO:0016301//kinase activity;GO:0003824//catalytic activity;GO:0030554//adenyl nucle…
LOC110699924	NA	GO:0008152//metabolic process;GO:0071704//organic substance metabolic process;GO:0044238//primary metabolic process;GO:0005975//carbohydrate metabolic process;GO:0016853//isomerase activity;GO:0003824//catalytic activity;GO:0004614//phosphoglucomutase activity;GO:0016866//intramolecular transferase activity;GO:0016868//intramolecular transferase activity, phosphotransferases;
LOC110726700	K04554//ubiquitin-conjugating enzyme E2 J2 [EC:2.3.2.23]+ko04141//Protein processing in endoplasmic reticulum+ko04120//Ubiquitin mediated proteolysis;K04554//ubiquitin-conjugating enzyme E2 J2 [EC:2.3.2.23]+ko04141//Protein processing in endoplasmic reticulum+ko04120//Ubiquitin mediated proteolysis	GO:0110165//cellular anatomical entity;GO:0016020//membrane;GO:0016021//integral component of membrane;GO:0031224//intrinsic component of membrane;
LOC110720659	K17086//transmembrane 9 superfamily member 2/4;K17604//zinc finger SWIM domain-containing protein 3	NA
LOC110697755	NA	GO:0016020//membrane;GO:0031224//intrinsic component of membrane;GO:0110165//cellular anatomical entity;GO:0016021//integral component of membrane;
LOC110726030	K03237//translation initiation factor 2 subunit 1+ko04141//Protein processing in endoplasmic reticulum+ko03013//RNA transport	GO:0090079//translation regulator activity, nucleic acid binding;GO:0097159//organic cyclic compound binding;GO:0003743//translation initiation factor activity;GO:0003723//RNA binding;GO:0003676//nucleic acid binding;GO:0008135//translation factor activity, RNA binding;GO:1901363//heterocyclic compound binding;GO:0005488//binding;GO:0045182//translation regulator activity;
LOC110737666	K03006//DNA-directed RNA polymerase II subunit RPB1 [EC:2.7.7.6]+ko03020//RNA polymerase	GO:0003824//catalytic activity;GO:0016491//oxidoreductase activity;GO:0009055//electron transfer activity;
LOC110687278	NA	GO:0005515//protein binding;GO:0046983//protein dimerization activity;GO:0005488//binding;
LOC110707791	K08150//MFS transporter, SP family, solute carrier family 2 (myo-inositol transporter), member 13	GO:0031224//intrinsic component of membrane;GO:0110165//cellular anatomical entity;GO:0016020//membrane;GO:0016021//integral component of membrane;GO:0022857//transmembrane transporter activity;GO:0005215//transporter activity;
LOC110736215	K20456//oxysterol-binding protein 1;K03327//multidrug resistance protein, MATE family	GO:0110165//cellular anatomical entity;GO:0031224//intrinsic component of membrane;GO:0016020//membrane;GO:0016021//integral component of membrane;GO:0015291//secondary active transmembrane transporter activity;GO:0022857//transmembrane transporter activity;GO:0022804//active transmembrane transporter activity;GO:0005215//transporter activity;GO:0015297//antiporter activity;GO:0042910//xenobiotic…
LOC110687993	K22733//magnesium transporter;K17710//pentatricopeptide repeat domain-containing protein 1	GO:0046872//metal ion binding;GO:0046914//transition metal ion binding;GO:0043169//cation binding;GO:0043167//ion binding;GO:0008270//zinc ion binding;GO:0005488//binding;
LOC110703411	K09060//plant G-box-binding factor;K09060//plant G-box-binding factor;K09060//plant G-box-binding factor	NA
LOC110691294	K17545//serine/threonine-protein kinase ULK4 [EC:2.7.11.1];K03283//heat shock 70kDa protein 1/2/6/8+ko03040//Spliceosome+ko04144//Endocytosis+ko04141//Protein processing in endoplasmic reticulum	NA
LOC110695919	K07542//phosphatidylinositol glycan, class V [EC:2.4.1.-]+ko01100//Metabolic pathways+ko00563//Glycosylphosphatidylinositol (GPI)-anchor biosynthesis;K07542//phosphatidylinositol glycan, class V [EC:2.4.1.-]+ko01100//Metabolic pathways+ko00563//Glycosylphosphatidylinositol (GPI)-anchor biosynthesis	GO:0006505//GPI anchor metabolic process;GO:1901137//carbohydrate derivative biosynthetic process;GO:0090407//organophosphate biosynthetic process;GO:0019538//protein metabolic process;GO:1901135//carbohydrate derivative metabolic process;GO:1901576//organic substance biosynthetic process;GO:0046474//glycerophospholipid biosynthetic process;GO:0009058//biosynthetic process;GO:0044249//cellular bi…
LOC110730669	K12741//heterogeneous nuclear ribonucleoprotein A1/A3+ko03040//Spliceosome	GO:1901363//heterocyclic compound binding;GO:0003676//nucleic acid binding;GO:0005488//binding;GO:0097159//organic cyclic compound binding;GO:0003723//RNA binding;
LOC110712507	K12447//UDP-sugar pyrophosphorylase [EC:2.7.7.64]+ko00520//Amino sugar and nucleotide sugar metabolism+ko00040//Pentose and glucuronate interconversions+ko01100//Metabolic pathways+ko00052//Galactose metabolism+ko00053//Ascorbate and aldarate metabolism;K03515//DNA repair protein REV1 [EC:2.7.7.-]	NA
LOC110697415	NA	GO:0009889//regulation of biosynthetic process;GO:0019219//regulation of nucleobase-containing compound metabolic process;GO:0010556//regulation of macromolecule biosynthetic process;GO:0031323//regulation of cellular metabolic process;GO:0050789//regulation of biological process;GO:0019222//regulation of metabolic process;GO:0006355//regulation of transcription, DNA-templated;GO:2001141//regulat…
LOC110722801	K14494//DELLA protein+ko04075//Plant hormone signal transduction	GO:0032502//developmental process;GO:0030154//cell differentiation;GO:2000026//regulation of multicellular organismal development;GO:0048869//cellular developmental process;GO:0009987//cellular process;GO:0065007//biological regulation;GO:0048831//regulation of shoot system development;GO:0050789//regulation of biological process;GO:0050793//regulation of developmental process;GO:0051239//regulat…
LOC110683095	K13066//caffeic acid 3-O-methyltransferase [EC:2.1.1.68]+ko01100//Metabolic pathways+ko01110//Biosynthesis of secondary metabolites+ko00940//Phenylpropanoid biosynthesis	GO:0008171//O-methyltransferase activity;GO:0008168//methyltransferase activity;GO:0016741//transferase activity, transferring one-carbon groups;GO:0016740//transferase activity;GO:0003824//catalytic activity;
LOC110737616	K15718//linoleate 9S-lipoxygenase [EC:1.13.11.58]+ko00591//Linoleic acid metabolism;K07478//putative ATPase;K09754//5-O-(4-coumaroyl)-D-quinate 3'-monooxygenase [EC:1.14.14.96]+ko01100//Metabolic pathways+ko01110//Biosynthesis of secondary metabolites+ko00940//Phenylpropanoid biosynthesis+ko00941//Flavonoid biosynthesis+ko00945//Stilbenoid, diarylheptanoid and gingerol biosynthesis;K08176//MFS tr…	NA
LOC110733477	K02178//checkpoint serine/threonine-protein kinase [EC:2.7.11.1];K02178//checkpoint serine/threonine-protein kinase [EC:2.7.11.1]	GO:0045786//negative regulation of cell cycle;GO:0010564//regulation of cell cycle process;GO:0007093//mitotic cell cycle checkpoint;GO:0033044//regulation of chromosome organization;GO:0022402//cell cycle process;GO:2000816//negative regulation of mitotic sister chromatid separation;GO:1901988//negative regulation of cell cycle phase transition;GO:0051983//regulation of chromosome segregation;GO…
BGI_novel_G004850	K03006//DNA-directed RNA polymerase II subunit RPB1 [EC:2.7.7.6]+ko03020//RNA polymerase	GO:0006139//nucleobase-containing compound metabolic process;GO:0015074//DNA integration;GO:0006725//cellular aromatic compound metabolic process;GO:0043170//macromolecule metabolic process;GO:0034641//cellular nitrogen compound metabolic process;GO:0006807//nitrogen compound metabolic process;GO:0006259//DNA metabolic process;GO:0044238//primary metabolic process;GO:0044237//cellular metabolic p…
LOC110735176	K17732//mitochondrial-processing peptidase subunit beta [EC:3.4.24.64]	GO:0046872//metal ion binding;GO:0004175//endopeptidase activity;GO:0070011//peptidase activity, acting on L-amino acid peptides;GO:0008233//peptidase activity;GO:0003824//catalytic activity;GO:0043169//cation binding;GO:0008237//metallopeptidase activity;GO:0016787//hydrolase activity;GO:0005488//binding;GO:0140096//catalytic activity, acting on a protein;GO:0004222//metalloendopeptidase activit…
LOC110718942	K04460//serine/threonine-protein phosphatase 5 [EC:3.1.3.16];K12448//UDP-arabinose 4-epimerase [EC:5.1.3.5]+ko00520//Amino sugar and nucleotide sugar metabolism+ko01100//Metabolic pathways;K00134//glyceraldehyde 3-phosphate dehydrogenase [EC:1.2.1.12]+ko00010//Glycolysis / Gluconeogenesis+ko01230//Biosynthesis of amino acids+ko01100//Metabolic pathways+ko01110//Biosynthesis of secondary metabolit…	NA
LOC110702162	K03549//KUP system potassium uptake protein;K03006//DNA-directed RNA polymerase II subunit RPB1 [EC:2.7.7.6]+ko03020//RNA polymerase;K04733//interleukin-1 receptor-associated kinase 4 [EC:2.7.11.1];K00284//glutamate synthase (ferredoxin) [EC:1.4.7.1]+ko00910//Nitrogen metabolism+ko00630//Glyoxylate and dicarboxylate metabolism;K22686//pro-apoptotic serine protease NMA111 [EC:3.4.21.-]	GO:0090304//nucleic acid metabolic process;GO:0034641//cellular nitrogen compound metabolic process;GO:0006139//nucleobase-containing compound metabolic process;GO:0009987//cellular process;GO:0015074//DNA integration;GO:0046483//heterocycle metabolic process;GO:0006259//DNA metabolic process;GO:0008152//metabolic process;GO:0044237//cellular metabolic process;GO:0006807//nitrogen compound metabo…
LOC110740329	K08597//sentrin-specific protease 8 [EC:3.4.22.68];K08597//sentrin-specific protease 8 [EC:3.4.22.68];K08597//sentrin-specific protease 8 [EC:3.4.22.68];K08597//sentrin-specific protease 8 [EC:3.4.22.68];K08597//sentrin-specific protease 8 [EC:3.4.22.68]	NA
LOC110728127	K20168//TBC1 domain family member 15;K20168//TBC1 domain family member 15	NA
LOC110705896	K03695//ATP-dependent Clp protease ATP-binding subunit ClpB;K08332//vacuolar protein 8	NA
LOC110693155	NA	GO:0034249//negative regulation of cellular amide metabolic process;GO:0065007//biological regulation;GO:0019222//regulation of metabolic process;GO:0051246//regulation of protein metabolic process;GO:0009889//regulation of biosynthetic process;GO:0050794//regulation of cellular process;GO:0051248//negative regulation of protein metabolic process;GO:0034248//regulation of cellular amide metabolic…
LOC110725443	NA	GO:0044264//cellular polysaccharide metabolic process;GO:0005976//polysaccharide metabolic process;GO:0045229//external encapsulating structure organization;GO:0034645//cellular macromolecule biosynthetic process;GO:0000271//polysaccharide biosynthetic process;GO:0009058//biosynthetic process;GO:0071554//cell wall organization or biogenesis;GO:0043170//macromolecule metabolic process;GO:0044260//…
BGI_novel_G000687	K00432//glutathione peroxidase [EC:1.11.1.9]+ko00590//Arachidonic acid metabolism+ko00480//Glutathione metabolism	GO:0006979//response to oxidative stress;GO:0050896//response to stimulus;GO:0006950//response to stress;GO:0016209//antioxidant activity;GO:0004602//glutathione peroxidase activity;GO:0003824//catalytic activity;GO:0004601//peroxidase activity;GO:0016491//oxidoreductase activity;GO:0016684//oxidoreductase activity, acting on peroxide as acceptor;
LOC110703139	NA	GO:0031224//intrinsic component of membrane;GO:0110165//cellular anatomical entity;GO:0005886//plasma membrane;GO:0071944//cell periphery;GO:0016020//membrane;GO:0016021//integral component of membrane;
LOC110700372	K17868//diphthine methyl ester acylhydrolase [EC:3.1.1.97];K17868//diphthine methyl ester acylhydrolase [EC:3.1.1.97]	GO:0032259//methylation;GO:0008152//metabolic process;GO:0003824//catalytic activity;GO:0016741//transferase activity, transferring one-carbon groups;GO:0016740//transferase activity;GO:0008168//methyltransferase activity;
LOC110709862	K02155//V-type H+-transporting ATPase 16kDa proteolipid subunit+ko04145//Phagosome+ko01100//Metabolic pathways+ko00190//Oxidative phosphorylation	GO:0033177//proton-transporting two-sector ATPase complex, proton-transporting domain;GO:0098588//bounding membrane of organelle;GO:0016021//integral component of membrane;GO:0098805//whole membrane;GO:0005773//vacuole;GO:0043229//intracellular organelle;GO:0005622//intracellular;GO:0031224//intrinsic component of membrane;GO:0016469//proton-transporting two-sector ATPase complex;GO:0043227//memb…
LOC110690302	K00074//3-hydroxybutyryl-CoA dehydrogenase [EC:1.1.1.157]+ko01100//Metabolic pathways+ko00650//Butanoate metabolism+ko00360//Phenylalanine metabolism	GO:0044281//small molecule metabolic process;GO:0008152//metabolic process;GO:0071704//organic substance metabolic process;GO:0006629//lipid metabolic process;GO:0044255//cellular lipid metabolic process;GO:0044237//cellular metabolic process;GO:0032787//monocarboxylic acid metabolic process;GO:0006082//organic acid metabolic process;GO:0019752//carboxylic acid metabolic process;GO:0006631//fatty…
LOC110714502	NA	GO:0016021//integral component of membrane;GO:0016020//membrane;GO:0110165//cellular anatomical entity;GO:0031224//intrinsic component of membrane;GO:0016491//oxidoreductase activity;GO:0009055//electron transfer activity;GO:0003824//catalytic activity;
LOC110689632	K00876//uridine kinase [EC:2.7.1.48]+ko01100//Metabolic pathways+ko00240//Pyrimidine metabolism;K15027//translation initiation factor 2D	NA
LOC110688463	NA	GO:0016020//membrane;GO:0016021//integral component of membrane;GO:0031224//intrinsic component of membrane;GO:0110165//cellular anatomical entity;
BGI_novel_G000876	K17545//serine/threonine-protein kinase ULK4 [EC:2.7.11.1]	NA
LOC110719701	K17604//zinc finger SWIM domain-containing protein 3;K17604//zinc finger SWIM domain-containing protein 3;K17604//zinc finger SWIM domain-containing protein 3;K17604//zinc finger SWIM domain-containing protein 3	NA
BGI_novel_G003515	K12669//oligosaccharyltransferase complex subunit gamma+ko04141//Protein processing in endoplasmic reticulum+ko00510//N-Glycan biosynthesis+ko01100//Metabolic pathways;K04683//transcription factor Dp-1	NA
LOC110737347	K03094//S-phase kinase-associated protein 1+ko04141//Protein processing in endoplasmic reticulum+ko04120//Ubiquitin mediated proteolysis	NA
LOC110724666	K18195//rhamnogalacturonan endolyase [EC:4.2.2.23]	GO:0008152//metabolic process;GO:0044238//primary metabolic process;GO:0071704//organic substance metabolic process;GO:0005975//carbohydrate metabolic process;GO:0003824//catalytic activity;GO:0030246//carbohydrate binding;GO:0005488//binding;
LOC110734728	K01859//chalcone isomerase [EC:5.5.1.6]+ko01100//Metabolic pathways+ko01110//Biosynthesis of secondary metabolites+ko00941//Flavonoid biosynthesis;K04733//interleukin-1 receptor-associated kinase 4 [EC:2.7.11.1];K09597//signal peptide peptidase-like 2B [EC:3.4.23.-]	GO:0016021//integral component of membrane;GO:0031224//intrinsic component of membrane;GO:0016020//membrane;GO:0110165//cellular anatomical entity;GO:0043169//cation binding;GO:0046872//metal ion binding;GO:0005488//binding;GO:0005509//calcium ion binding;GO:0043167//ion binding;
LOC110727900	K08496//golgi SNAP receptor complex member 2+ko04130//SNARE interactions in vesicular transport	GO:0016192//vesicle-mediated transport;GO:0033036//macromolecule localization;GO:0006810//transport;GO:0042886//amide transport;GO:0015031//protein transport;GO:0051179//localization;GO:0009987//cellular process;GO:0045184//establishment of protein localization;GO:0051234//establishment of localization;GO:0008104//protein localization;GO:0071705//nitrogen compound transport;GO:0071702//organic su…
LOC110695223	K10882//crossover junction endonuclease EME1 [EC:3.1.22.-]+ko03440//Homologous recombination;K10882//crossover junction endonuclease EME1 [EC:3.1.22.-]+ko03440//Homologous recombination;K10882//crossover junction endonuclease EME1 [EC:3.1.22.-]+ko03440//Homologous recombination;K10882//crossover junction endonuclease EME1 [EC:3.1.22.-]+ko03440//Homologous recombination;K10882//crossover junction …	NA
BGI_novel_G005425	K14677//aminoacylase [EC:3.5.1.14]+ko00220//Arginine biosynthesis+ko01230//Biosynthesis of amino acids+ko01100//Metabolic pathways+ko01110//Biosynthesis of secondary metabolites+ko01210//2-Oxocarboxylic acid metabolism	NA
LOC110694355	K08272//calcium binding protein 39;K04077//chaperonin GroEL+ko03018//RNA degradation	NA
LOC110709987	K20718//LRR receptor-like serine/threonine-protein kinase ERECTA [EC:2.7.11.1]+ko04016//MAPK signaling pathway - plant	NA
LOC110687194	K08770//ubiquitin C	NA
LOC110718342	K08857//NIMA (never in mitosis gene a)-related kinase 1/4/5 [EC:2.7.11.1];K22696//protein-lysine N-methyltransferase EEF2KMT [EC:2.1.1.-]	NA
LOC110736625	K18875//enhanced disease susceptibility 1 protein+ko04626//Plant-pathogen interaction	GO:0044238//primary metabolic process;GO:0006629//lipid metabolic process;GO:0071704//organic substance metabolic process;GO:0008152//metabolic process;
LOC110714956	K10624//E3 ubiquitin-protein ligase RBBP6 [EC:2.3.2.27];K10624//E3 ubiquitin-protein ligase RBBP6 [EC:2.3.2.27];K10624//E3 ubiquitin-protein ligase RBBP6 [EC:2.3.2.27];K10624//E3 ubiquitin-protein ligase RBBP6 [EC:2.3.2.27]	NA
LOC110692919	K13066//caffeic acid 3-O-methyltransferase [EC:2.1.1.68]+ko01100//Metabolic pathways+ko01110//Biosynthesis of secondary metabolites+ko00940//Phenylpropanoid biosynthesis	GO:0032259//methylation;GO:0008152//metabolic process;GO:0008171//O-methyltransferase activity;GO:0005488//binding;GO:0016740//transferase activity;GO:0046983//protein dimerization activity;GO:0016741//transferase activity, transferring one-carbon groups;GO:0005515//protein binding;GO:0003824//catalytic activity;GO:0008168//methyltransferase activity;
LOC110733380	K13993//HSP20 family protein+ko04141//Protein processing in endoplasmic reticulum	NA
LOC110736579	K12126//phytochrome-interacting factor 3+ko04712//Circadian rhythm - plant+ko04075//Plant hormone signal transduction;K12126//phytochrome-interacting factor 3+ko04712//Circadian rhythm - plant+ko04075//Plant hormone signal transduction	GO:0046983//protein dimerization activity;GO:0005488//binding;GO:0005515//protein binding;
LOC110724290	K19044//E3 ubiquitin-protein ligase XBAT32/33 [EC:2.3.2.27];K19044//E3 ubiquitin-protein ligase XBAT32/33 [EC:2.3.2.27];K19044//E3 ubiquitin-protein ligase XBAT32/33 [EC:2.3.2.27];K19044//E3 ubiquitin-protein ligase XBAT32/33 [EC:2.3.2.27]	NA
LOC110687241	K05765//cofilin;K13422//transcription factor MYC2+ko04016//MAPK signaling pathway - plant+ko04075//Plant hormone signal transduction;K12126//phytochrome-interacting factor 3+ko04712//Circadian rhythm - plant+ko04075//Plant hormone signal transduction;K16189//phytochrome-interacting factor 4+ko04075//Plant hormone signal transduction	GO:0046983//protein dimerization activity;GO:0005515//protein binding;GO:0005488//binding;
LOC110705772	NA	GO:0015035//protein disulfide oxidoreductase activity;GO:0016491//oxidoreductase activity;GO:0003824//catalytic activity;GO:0015036//disulfide oxidoreductase activity;GO:0016667//oxidoreductase activity, acting on a sulfur group of donors;
LOC110694695	K04733//interleukin-1 receptor-associated kinase 4 [EC:2.7.11.1]	NA
LOC110686473	K17604//zinc finger SWIM domain-containing protein 3	NA
LOC110693595	K13783//MFS transporter, OPA family, solute carrier family 37 (glycerol-3-phosphate transporter), member 1/2;K02875//large subunit ribosomal protein L14e+ko03010//Ribosome	NA
LOC110702084	K22530//ATPase family AAA domain-containing protein 1 [EC:3.6.1.-];K13254//spastin [EC:5.6.1.1];K03231//elongation factor 1-alpha+ko03013//RNA transport;K22530//ATPase family AAA domain-containing protein 1 [EC:3.6.1.-];K13254//spastin [EC:5.6.1.1];K03231//elongation factor 1-alpha+ko03013//RNA transport	NA
LOC110722578	K14411//RNA-binding protein Musashi+ko03015//mRNA surveillance pathway	NA
BGI_novel_G001925	K13420//LRR receptor-like serine/threonine-protein kinase FLS2 [EC:2.7.11.1]+ko04016//MAPK signaling pathway - plant+ko04626//Plant-pathogen interaction	NA
LOC110688298	K02926//large subunit ribosomal protein L4+ko03010//Ribosome	GO:0043043//peptide biosynthetic process;GO:0016070//RNA metabolic process;GO:0044267//cellular protein metabolic process;GO:0044238//primary metabolic process;GO:0009987//cellular process;GO:0010467//gene expression;GO:0071704//organic substance metabolic process;GO:0034645//cellular macromolecule biosynthetic process;GO:1901566//organonitrogen compound biosynthetic process;GO:0034654//nucleobas…
LOC110739036	K17604//zinc finger SWIM domain-containing protein 3	NA
LOC110732999	K01897//long-chain acyl-CoA synthetase [EC:6.2.1.3]+ko04146//Peroxisome+ko01100//Metabolic pathways+ko00061//Fatty acid biosynthesis+ko01212//Fatty acid metabolism+ko00071//Fatty acid degradation;K01897//long-chain acyl-CoA synthetase [EC:6.2.1.3]+ko04146//Peroxisome+ko01100//Metabolic pathways+ko00061//Fatty acid biosynthesis+ko01212//Fatty acid metabolism+ko00071//Fatty acid degradation;K01897/…	GO:0003824//catalytic activity;
LOC110686345	K00799//glutathione S-transferase [EC:2.5.1.18]+ko00480//Glutathione metabolism	NA
LOC110732586	K14638//solute carrier family 15 (peptide/histidine transporter), member 3/4;K14638//solute carrier family 15 (peptide/histidine transporter), member 3/4	GO:0016020//membrane;GO:0110165//cellular anatomical entity;GO:0031224//intrinsic component of membrane;GO:0016021//integral component of membrane;GO:0022857//transmembrane transporter activity;GO:0005215//transporter activity;
LOC110726340	K01079//phosphoserine phosphatase [EC:3.1.3.3]+ko01230//Biosynthesis of amino acids+ko01100//Metabolic pathways+ko00260//Glycine, serine and threonine metabolism+ko01200//Carbon metabolism;K01079//phosphoserine phosphatase [EC:3.1.3.3]+ko01230//Biosynthesis of amino acids+ko01100//Metabolic pathways+ko00260//Glycine, serine and threonine metabolism+ko01200//Carbon metabolism;K01079//phosphoserine…	GO:0008652//cellular amino acid biosynthetic process;GO:0044283//small molecule biosynthetic process;GO:0009069//serine family amino acid metabolic process;GO:0009070//serine family amino acid biosynthetic process;GO:0006564//L-serine biosynthetic process;GO:0019752//carboxylic acid metabolic process;GO:1901566//organonitrogen compound biosynthetic process;GO:0044237//cellular metabolic process;G…
LOC110693476	K12598//ATP-dependent RNA helicase DOB1 [EC:3.6.4.13]+ko03018//RNA degradation;K12857//Prp8 binding protein+ko03040//Spliceosome;K14963//COMPASS component SWD3;K12598//ATP-dependent RNA helicase DOB1 [EC:3.6.4.13]+ko03018//RNA degradation;K12857//Prp8 binding protein+ko03040//Spliceosome	GO:0032502//developmental process;GO:0007275//multicellular organism development;GO:0048856//anatomical structure development;GO:0032501//multicellular organismal process;GO:0110165//cellular anatomical entity;GO:0043227//membrane-bounded organelle;GO:0043229//intracellular organelle;GO:0005622//intracellular;GO:0043231//intracellular membrane-bounded organelle;GO:0005634//nucleus;GO:0043226//org…
LOC110691679	K22804//structural maintenance of chromosomes protein 6;K01188//beta-glucosidase [EC:3.2.1.21]+ko01100//Metabolic pathways+ko00500//Starch and sucrose metabolism+ko01110//Biosynthesis of secondary metabolites+ko00460//Cyanoamino acid metabolism+ko00940//Phenylpropanoid biosynthesis;K18195//rhamnogalacturonan endolyase [EC:4.2.2.23];K22048//mechanosensitive ion channel protein 4/5/6/7/8/9/10;K1287…	NA
LOC110702431	K23047//E3 ubiquitin-protein ligase UNKL [EC:2.3.2.27]	GO:1990837//sequence-specific double-stranded DNA binding;GO:0005488//binding;GO:0097159//organic cyclic compound binding;GO:0003680//AT DNA binding;GO:0003676//nucleic acid binding;GO:0043565//sequence-specific DNA binding;GO:0003690//double-stranded DNA binding;GO:0003677//DNA binding;GO:1901363//heterocyclic compound binding;
LOC110688025	K00921//1-phosphatidylinositol-3-phosphate 5-kinase [EC:2.7.1.150]+ko04145//Phagosome+ko01100//Metabolic pathways+ko04070//Phosphatidylinositol signaling system+ko00562//Inositol phosphate metabolism;K00921//1-phosphatidylinositol-3-phosphate 5-kinase [EC:2.7.1.150]+ko04145//Phagosome+ko01100//Metabolic pathways+ko04070//Phosphatidylinositol signaling system+ko00562//Inositol phosphate metabolism	GO:0043167//ion binding;GO:0043168//anion binding;GO:1901363//heterocyclic compound binding;GO:0005524//ATP binding;GO:0016301//kinase activity;GO:0005488//binding;GO:1901265//nucleoside phosphate binding;GO:0036094//small molecule binding;GO:0003824//catalytic activity;GO:0032553//ribonucleotide binding;GO:0043169//cation binding;GO:0016772//transferase activity, transferring phosphorus-containi…
LOC110699312	K18172//COX assembly mitochondrial protein 2;K18172//COX assembly mitochondrial protein 2;K18172//COX assembly mitochondrial protein 2;K18172//COX assembly mitochondrial protein 2;K18172//COX assembly mitochondrial protein 2;K18172//COX assembly mitochondrial protein 2;K18172//COX assembly mitochondrial protein 2	GO:0110165//cellular anatomical entity;GO:0043229//intracellular organelle;GO:0005739//mitochondrion;GO:0005737//cytoplasm;GO:0043231//intracellular membrane-bounded organelle;GO:0005622//intracellular;GO:0043226//organelle;GO:0043227//membrane-bounded organelle;
LOC110739906	K10393//kinesin family member 2/24;K11600//exosome complex component RRP41+ko03018//RNA degradation;K18195//rhamnogalacturonan endolyase [EC:4.2.2.23];K04733//interleukin-1 receptor-associated kinase 4 [EC:2.7.11.1];K11643//chromodomain-helicase-DNA-binding protein 4 [EC:3.6.4.12]	NA
LOC110705834	K04733//interleukin-1 receptor-associated kinase 4 [EC:2.7.11.1]	GO:0016020//membrane;GO:0016021//integral component of membrane;GO:0031224//intrinsic component of membrane;GO:0110165//cellular anatomical entity;GO:0030247//polysaccharide binding;GO:0097159//organic cyclic compound binding;GO:0005524//ATP binding;GO:0004674//protein serine/threonine kinase activity;GO:0005509//calcium ion binding;GO:0030246//carbohydrate binding;GO:0043169//cation binding;GO:0…
LOC110712283	K01303//acylaminoacyl-peptidase [EC:3.4.19.1];K09494//T-complex protein 1 subunit beta;K08176//MFS transporter, PHS family, inorganic phosphate transporter	NA
LOC110685128	K15255//ATP-dependent DNA helicase PIF1 [EC:3.6.4.12]	NA
LOC110684677	K04733//interleukin-1 receptor-associated kinase 4 [EC:2.7.11.1]	GO:0016021//integral component of membrane;GO:0016020//membrane;GO:0110165//cellular anatomical entity;GO:0031224//intrinsic component of membrane;GO:0032555//purine ribonucleotide binding;GO:0030554//adenyl nucleotide binding;GO:0016773//phosphotransferase activity, alcohol group as acceptor;GO:0016740//transferase activity;GO:0097367//carbohydrate derivative binding;GO:0043168//anion binding;GO…
LOC110720290	K16818//phospholipase A1 [EC:3.1.1.32]+ko00592//alpha-Linolenic acid metabolism+ko01100//Metabolic pathways+ko01110//Biosynthesis of secondary metabolites+ko00564//Glycerophospholipid metabolism	GO:0071704//organic substance metabolic process;GO:0006629//lipid metabolic process;GO:0008152//metabolic process;GO:0044238//primary metabolic process;
LOC110712260	K00799//glutathione S-transferase [EC:2.5.1.18]+ko00480//Glutathione metabolism;K04733//interleukin-1 receptor-associated kinase 4 [EC:2.7.11.1];K15190//7SK snRNA methylphosphate capping enzyme [EC:2.1.1.-];K09833//homogentisate phytyltransferase / homogentisate geranylgeranyltransferase [EC:2.5.1.115 2.5.1.116]+ko00130//Ubiquinone and other terpenoid-quinone biosynthesis+ko01100//Metabolic pathw…	NA
BGI_novel_G001872	K21797//phosphatidylinositol 4-phosphatase [EC:3.1.3.-]+ko01100//Metabolic pathways+ko04070//Phosphatidylinositol signaling system+ko00562//Inositol phosphate metabolism	GO:0042578//phosphoric ester hydrolase activity;GO:0016787//hydrolase activity;GO:0003824//catalytic activity;GO:0016788//hydrolase activity, acting on ester bonds;
LOC110729072	K12355//coniferyl-aldehyde dehydrogenase [EC:1.2.1.68]+ko00940//Phenylpropanoid biosynthesis	GO:0016903//oxidoreductase activity, acting on the aldehyde or oxo group of donors;GO:0016491//oxidoreductase activity;GO:0003824//catalytic activity;GO:0016620//oxidoreductase activity, acting on the aldehyde or oxo group of donors, NAD or NADP as acceptor;
LOC110684962	K10773//endonuclease III [EC:4.2.99.18]+ko03410//Base excision repair;K01870//isoleucyl-tRNA synthetase [EC:6.1.1.5]+ko00970//Aminoacyl-tRNA biosynthesis	GO:1901363//heterocyclic compound binding;GO:0097159//organic cyclic compound binding;GO:0005488//binding;GO:0003676//nucleic acid binding;
LOC110688558	K13459//disease resistance protein RPS2+ko04626//Plant-pathogen interaction	NA
LOC110686873	K04733//interleukin-1 receptor-associated kinase 4 [EC:2.7.11.1];K20888//xyloglucan galactosyltransferase MUR3 [EC:2.4.1.-];K12251//N-carbamoylputrescine amidase [EC:3.5.1.53]+ko00330//Arginine and proline metabolism+ko01100//Metabolic pathways	NA
LOC110688476	NA	GO:0018995//host cellular component;GO:0033646//host intracellular part;GO:0033643//host cell part;GO:0033647//host intracellular organelle;GO:0043656//host intracellular region;GO:0110165//cellular anatomical entity;GO:0042025//host cell nucleus;GO:0033648//host intracellular membrane-bounded organelle;GO:0043657//host cell;GO:0097159//organic cyclic compound binding;GO:0003677//DNA binding;GO:1…
LOC110694062	K02941//large subunit ribosomal protein LP0+ko03010//Ribosome;K22733//magnesium transporter;K22733//magnesium transporter;K02941//large subunit ribosomal protein LP0+ko03010//Ribosome	GO:0005996//monosaccharide metabolic process;GO:0008152//metabolic process;GO:0071704//organic substance metabolic process;GO:0044281//small molecule metabolic process;GO:0044238//primary metabolic process;GO:0019318//hexose metabolic process;GO:0005975//carbohydrate metabolic process;GO:0006004//fucose metabolic process;GO:0031224//intrinsic component of membrane;GO:0110165//cellular anatomical …
LOC110694813	K00102//D-lactate dehydrogenase (cytochrome) [EC:1.1.2.4]+ko00620//Pyruvate metabolism;K12396//AP-3 complex subunit delta;K19525//vacuolar protein sorting-associated protein 13A/C;K15255//ATP-dependent DNA helicase PIF1 [EC:3.6.4.12];K10756//replication factor C subunit 3/5+ko03420//Nucleotide excision repair+ko03030//DNA replication+ko03430//Mismatch repair	GO:0046483//heterocycle metabolic process;GO:0006399//tRNA metabolic process;GO:0044281//small molecule metabolic process;GO:0043043//peptide biosynthetic process;GO:0044267//cellular protein metabolic process;GO:0006520//cellular amino acid metabolic process;GO:1901566//organonitrogen compound biosynthetic process;GO:0043170//macromolecule metabolic process;GO:0019752//carboxylic acid metabolic …
LOC110713461	K00432//glutathione peroxidase [EC:1.11.1.9]+ko00590//Arachidonic acid metabolism+ko00480//Glutathione metabolism	GO:0006950//response to stress;GO:0006979//response to oxidative stress;GO:0050896//response to stimulus;GO:0003824//catalytic activity;GO:0004602//glutathione peroxidase activity;GO:0004601//peroxidase activity;GO:0016491//oxidoreductase activity;GO:0016684//oxidoreductase activity, acting on peroxide as acceptor;GO:0016209//antioxidant activity;
LOC110695804	K11323//histone arginine demethylase JMJD6 [EC:1.14.11.-]	NA
LOC110737568	K20290//conserved oligomeric Golgi complex subunit 3;K22503//aspartyl-tRNA synthetase [EC:6.1.1.12]+ko00970//Aminoacyl-tRNA biosynthesis;K05019//chloride channel, nucleotide-sensitive, 1A+ko03013//RNA transport	NA
BGI_novel_G000026	K03006//DNA-directed RNA polymerase II subunit RPB1 [EC:2.7.7.6]+ko03020//RNA polymerase	NA
LOC110695516	K17545//serine/threonine-protein kinase ULK4 [EC:2.7.11.1];K04733//interleukin-1 receptor-associated kinase 4 [EC:2.7.11.1];K01528//dynamin GTPase [EC:3.6.5.5]+ko04144//Endocytosis;K05349//beta-glucosidase [EC:3.2.1.21]+ko01100//Metabolic pathways+ko00500//Starch and sucrose metabolism+ko01110//Biosynthesis of secondary metabolites+ko00460//Cyanoamino acid metabolism+ko00940//Phenylpropanoid bios…	NA
LOC110731381	K12669//oligosaccharyltransferase complex subunit gamma+ko04141//Protein processing in endoplasmic reticulum+ko00510//N-Glycan biosynthesis+ko01100//Metabolic pathways	GO:0016021//integral component of membrane;GO:0016020//membrane;GO:0110165//cellular anatomical entity;GO:0031224//intrinsic component of membrane;
LOC110709663	K11323//histone arginine demethylase JMJD6 [EC:1.14.11.-];K11323//histone arginine demethylase JMJD6 [EC:1.14.11.-];K11323//histone arginine demethylase JMJD6 [EC:1.14.11.-]	NA
LOC110736132	K11000//callose synthase [EC:2.4.1.-];K11000//callose synthase [EC:2.4.1.-]	GO:0043170//macromolecule metabolic process;GO:0009059//macromolecule biosynthetic process;GO:0044238//primary metabolic process;GO:0005976//polysaccharide metabolic process;GO:0006073//cellular glucan metabolic process;GO:0044237//cellular metabolic process;GO:0009250//glucan biosynthetic process;GO:0006075//(1->3)-beta-D-glucan biosynthetic process;GO:0033692//cellular polysaccharide biosynthet…
LOC110683548	K22066//BolA-like protein 1	NA
LOC110718883	K00801//farnesyl-diphosphate farnesyltransferase [EC:2.5.1.21]+ko00909//Sesquiterpenoid and triterpenoid biosynthesis+ko01100//Metabolic pathways+ko01110//Biosynthesis of secondary metabolites+ko00100//Steroid biosynthesis	GO:0008152//metabolic process;GO:0006629//lipid metabolic process;GO:0009058//biosynthetic process;GO:1901576//organic substance biosynthetic process;GO:0008610//lipid biosynthetic process;GO:0044238//primary metabolic process;GO:0071704//organic substance metabolic process;GO:0031224//intrinsic component of membrane;GO:0110165//cellular anatomical entity;GO:0016020//membrane;GO:0016021//integral…
LOC110724371	K10393//kinesin family member 2/24;K18195//rhamnogalacturonan endolyase [EC:4.2.2.23]	NA
LOC110721320	K18626//trichohyalin	NA
LOC110688737	K03327//multidrug resistance protein, MATE family	NA
LOC110724781	K00475//naringenin 3-dioxygenase [EC:1.14.11.9]+ko01100//Metabolic pathways+ko01110//Biosynthesis of secondary metabolites+ko00941//Flavonoid biosynthesis	GO:0003824//catalytic activity;GO:0043167//ion binding;GO:0046872//metal ion binding;GO:0005488//binding;GO:0016491//oxidoreductase activity;GO:0043169//cation binding;
LOC110732325	K12472//epidermal growth factor receptor substrate 15+ko04144//Endocytosis;K11294//nucleolin	GO:0005488//binding;GO:0043167//ion binding;GO:0046872//metal ion binding;GO:0043169//cation binding;
BGI_novel_G003206	K19199//histone-lysine N-methyltransferase SETD3 [EC:2.1.1.43]+ko00310//Lysine degradation	NA
BGI_novel_G000016	K02886//large subunit ribosomal protein L2+ko03010//Ribosome	GO:0005737//cytoplasm;GO:0016020//membrane;GO:0009507//chloroplast;GO:0043227//membrane-bounded organelle;GO:0009532//plastid stroma;GO:0005622//intracellular;GO:0016021//integral component of membrane;GO:0031224//intrinsic component of membrane;GO:0043229//intracellular organelle;GO:0043231//intracellular membrane-bounded organelle;GO:0043226//organelle;GO:0110165//cellular anatomical entity;GO:…
LOC110732989	K04125//gibberellin 2beta-dioxygenase [EC:1.14.11.13]+ko00904//Diterpenoid biosynthesis+ko01110//Biosynthesis of secondary metabolites	GO:0043167//ion binding;GO:0043169//cation binding;GO:0005488//binding;GO:0046872//metal ion binding;GO:0016491//oxidoreductase activity;GO:0003824//catalytic activity;
LOC110705559	K17895//GATA-binding protein 3;K21630//GATA-type zinc finger protein 1	GO:0045893//positive regulation of transcription, DNA-templated;GO:1903506//regulation of nucleic acid-templated transcription;GO:0031326//regulation of cellular biosynthetic process;GO:0009893//positive regulation of metabolic process;GO:0019222//regulation of metabolic process;GO:0031328//positive regulation of cellular biosynthetic process;GO:0009987//cellular process;GO:0010557//positive regu…
LOC110739129	K01210//glucan 1,3-beta-glucosidase [EC:3.2.1.58]+ko00500//Starch and sucrose metabolism;K04733//interleukin-1 receptor-associated kinase 4 [EC:2.7.11.1]	GO:0071704//organic substance metabolic process;GO:0007010//cytoskeleton organization;GO:0030029//actin filament-based process;GO:0071840//cellular component organization or biogenesis;GO:0006996//organelle organization;GO:0030036//actin cytoskeleton organization;GO:0016043//cellular component organization;GO:0008152//metabolic process;GO:0044238//primary metabolic process;GO:0009987//cellular pr…
LOC110684447	K02358//elongation factor Tu	NA
LOC110695633	K16292//KDEL-tailed cysteine endopeptidase [EC:3.4.22.-];K01365//cathepsin L [EC:3.4.22.15]+ko04145//Phagosome	GO:0140096//catalytic activity, acting on a protein;GO:0016787//hydrolase activity;GO:0008234//cysteine-type peptidase activity;GO:0070011//peptidase activity, acting on L-amino acid peptides;GO:0003824//catalytic activity;GO:0008233//peptidase activity;
LOC110721444	K00615//transketolase [EC:2.2.1.1]+ko00030//Pentose phosphate pathway+ko01230//Biosynthesis of amino acids+ko01100//Metabolic pathways+ko01110//Biosynthesis of secondary metabolites+ko00710//Carbon fixation in photosynthetic organisms+ko01200//Carbon metabolism	GO:0016744//transferase activity, transferring aldehyde or ketonic groups;GO:0004802//transketolase activity;GO:0003824//catalytic activity;GO:0016740//transferase activity;
LOC110689724	K13420//LRR receptor-like serine/threonine-protein kinase FLS2 [EC:2.7.11.1]+ko04016//MAPK signaling pathway - plant+ko04626//Plant-pathogen interaction	NA
LOC110731196	K01940//argininosuccinate synthase [EC:6.3.4.5]+ko00250//Alanine, aspartate and glutamate metabolism+ko00220//Arginine biosynthesis+ko01230//Biosynthesis of amino acids+ko01100//Metabolic pathways+ko01110//Biosynthesis of secondary metabolites;K14491//two-component response regulator ARR-B family+ko04075//Plant hormone signal transduction;K01940//argininosuccinate synthase [EC:6.3.4.5]+ko00250//A…	NA
BGI_novel_G001072	K14790//nucleolar protein 9;K01792//glucose-6-phosphate 1-epimerase [EC:5.1.3.15]+ko00010//Glycolysis / Gluconeogenesis+ko01100//Metabolic pathways+ko01110//Biosynthesis of secondary metabolites	NA
LOC110685280	K14326//regulator of nonsense transcripts 1 [EC:3.6.4.-]+ko03015//mRNA surveillance pathway+ko03013//RNA transport;K05658//ATP-binding cassette, subfamily B (MDR/TAP), member 1 [EC:7.6.2.2]+ko02010//ABC transporters;K14007//protein transport protein SEC24+ko04141//Protein processing in endoplasmic reticulum;K02995//small subunit ribosomal protein S8e+ko03010//Ribosome;K01762//1-aminocyclopropane-…	NA
LOC110701557	K17604//zinc finger SWIM domain-containing protein 3	NA
LOC110725193	K09060//plant G-box-binding factor	GO:0140110//transcription regulator activity;GO:0003700//DNA-binding transcription factor activity;
LOC110716873	K15283//solute carrier family 35, member E1	NA
LOC110709890	K11649//SWI/SNF related-matrix-associated actin-dependent regulator of chromatin subfamily C;K21596//calmodulin-binding transcription activator;K04079//molecular chaperone HtpG+ko04141//Protein processing in endoplasmic reticulum+ko04626//Plant-pathogen interaction;K17535//serine/threonine-protein kinase TNNI3K [EC:2.7.11.1]	NA
LOC110683395	K04802//proliferating cell nuclear antigen+ko03420//Nucleotide excision repair+ko03030//DNA replication+ko03410//Base excision repair+ko03430//Mismatch repair	GO:0010556//regulation of macromolecule biosynthetic process;GO:0009987//cellular process;GO:2000112//regulation of cellular macromolecule biosynthetic process;GO:0006260//DNA replication;GO:0050789//regulation of biological process;GO:0044249//cellular biosynthetic process;GO:0009889//regulation of biosynthetic process;GO:0009059//macromolecule biosynthetic process;GO:0031323//regulation of cell…
LOC110707835	K15429//tRNA (guanine37-N1)-methyltransferase [EC:2.1.1.228];K15429//tRNA (guanine37-N1)-methyltransferase [EC:2.1.1.228];K15429//tRNA (guanine37-N1)-methyltransferase [EC:2.1.1.228];K15429//tRNA (guanine37-N1)-methyltransferase [EC:2.1.1.228]	GO:0070013//intracellular organelle lumen;GO:0043227//membrane-bounded organelle;GO:0031974//membrane-enclosed lumen;GO:0110165//cellular anatomical entity;GO:0005739//mitochondrion;GO:0005622//intracellular;GO:0043231//intracellular membrane-bounded organelle;GO:0005737//cytoplasm;GO:0005634//nucleus;GO:0043229//intracellular organelle;GO:0043233//organelle lumen;GO:0043226//organelle;GO:0005759…
BGI_novel_G004393	K11086//small nuclear ribonucleoprotein B and B'+ko03040//Spliceosome	NA
LOC110708558	K08678//UDP-glucuronate decarboxylase [EC:4.1.1.35]+ko00520//Amino sugar and nucleotide sugar metabolism+ko01100//Metabolic pathways;K10140//DNA damage-binding protein 2+ko03420//Nucleotide excision repair+ko04120//Ubiquitin mediated proteolysis	NA
LOC110696891	K03234//elongation factor 2;K00030//isocitrate dehydrogenase (NAD+) [EC:1.1.1.41]+ko00020//Citrate cycle (TCA cycle)+ko01230//Biosynthesis of amino acids+ko01100//Metabolic pathways+ko01110//Biosynthesis of secondary metabolites+ko01210//2-Oxocarboxylic acid metabolism+ko01200//Carbon metabolism	GO:0009058//biosynthetic process;GO:1901566//organonitrogen compound biosynthetic process;GO:0090407//organophosphate biosynthetic process;GO:0006661//phosphatidylinositol biosynthetic process;GO:0019538//protein metabolic process;GO:0044255//cellular lipid metabolic process;GO:1901137//carbohydrate derivative biosynthetic process;GO:0044237//cellular metabolic process;GO:0008654//phospholipid bi…
LOC110701738	K04508//transducin (beta)-like 1	NA
LOC110710423	K18468//vacuolar protein sorting-associated protein 35+ko04144//Endocytosis;K04125//gibberellin 2beta-dioxygenase [EC:1.14.11.13]+ko00904//Diterpenoid biosynthesis+ko01110//Biosynthesis of secondary metabolites;K13648//alpha-1,4-galacturonosyltransferase [EC:2.4.1.43]+ko00520//Amino sugar and nucleotide sugar metabolism;K14513//ethylene-insensitive protein 2+ko04016//MAPK signaling pathway - plan…	NA
LOC110698644	K12856//pre-mRNA-processing factor 8+ko03040//Spliceosome	GO:0000375//RNA splicing, via transesterification reactions;GO:0016071//mRNA metabolic process;GO:0006397//mRNA processing;GO:0090304//nucleic acid metabolic process;GO:1901360//organic cyclic compound metabolic process;GO:0000398//mRNA splicing, via spliceosome;GO:0016070//RNA metabolic process;GO:0000377//RNA splicing, via transesterification reactions with bulged adenosine as nucleophile;GO:00…
LOC110684235	K20642//Rho GTPase-activating protein 22/24/25;K13161//heterogeneous nuclear ribonucleoprotein R;K18647//acidic leucine-rich nuclear phosphoprotein 32 family member B	NA
LOC110695930	K12448//UDP-arabinose 4-epimerase [EC:5.1.3.5]+ko00520//Amino sugar and nucleotide sugar metabolism+ko01100//Metabolic pathways	GO:0016020//membrane;GO:0110165//cellular anatomical entity;GO:0016021//integral component of membrane;GO:0031224//intrinsic component of membrane;GO:0008324//cation transmembrane transporter activity;GO:0005215//transporter activity;GO:0015075//ion transmembrane transporter activity;GO:0022857//transmembrane transporter activity;
LOC110727457	K00276//primary-amine oxidase [EC:1.4.3.21]+ko00410//beta-Alanine metabolism+ko00960//Tropane, piperidine and pyridine alkaloid biosynthesis+ko00350//Tyrosine metabolism+ko01100//Metabolic pathways+ko00950//Isoquinoline alkaloid biosynthesis+ko01110//Biosynthesis of secondary metabolites+ko00260//Glycine, serine and threonine metabolism+ko00360//Phenylalanine metabolism;K04733//interleukin-1 rece…	NA
LOC110721671	K10534//nitrate reductase (NAD(P)H) [EC:1.7.1.1 1.7.1.2 1.7.1.3]+ko00910//Nitrogen metabolism;K13379//reversibly glycosylated polypeptide / UDP-arabinopyranose mutase [EC:2.4.1.- 5.4.99.30]+ko00520//Amino sugar and nucleotide sugar metabolism	GO:0016021//integral component of membrane;GO:0110165//cellular anatomical entity;GO:0031224//intrinsic component of membrane;GO:0016020//membrane;GO:0097159//organic cyclic compound binding;GO:0003824//catalytic activity;GO:0046872//metal ion binding;GO:0043169//cation binding;GO:0020037//heme binding;GO:0046906//tetrapyrrole binding;GO:0016491//oxidoreductase activity;GO:1901363//heterocyclic c…
LOC110713721	K03006//DNA-directed RNA polymerase II subunit RPB1 [EC:2.7.7.6]+ko03020//RNA polymerase;K11593//eukaryotic translation initiation factor 2C;K04733//interleukin-1 receptor-associated kinase 4 [EC:2.7.11.1]	NA
LOC110684947	K01535//H+-transporting ATPase [EC:7.1.2.1]+ko00190//Oxidative phosphorylation;K01535//H+-transporting ATPase [EC:7.1.2.1]+ko00190//Oxidative phosphorylation	GO:0051234//establishment of localization;GO:0120029//proton export across plasma membrane;GO:0098655//cation transmembrane transport;GO:0015672//monovalent inorganic cation transport;GO:0140352//export from cell;GO:0006811//ion transport;GO:0098660//inorganic ion transmembrane transport;GO:0006810//transport;GO:0140115//export across plasma membrane;GO:1902600//proton transmembrane transport;GO:…
LOC110709754	K10754//replication factor C subunit 1+ko03420//Nucleotide excision repair+ko03030//DNA replication+ko03430//Mismatch repair;K10754//replication factor C subunit 1+ko03420//Nucleotide excision repair+ko03030//DNA replication+ko03430//Mismatch repair	NA
LOC110711294	K12840//splicing factor 45+ko03040//Spliceosome	GO:0051252//regulation of RNA metabolic process;GO:0080090//regulation of primary metabolic process;GO:0010468//regulation of gene expression;GO:0051171//regulation of nitrogen compound metabolic process;GO:0050789//regulation of biological process;GO:0060255//regulation of macromolecule metabolic process;GO:0065007//biological regulation;GO:0019219//regulation of nucleobase-containing compound m…
LOC110718558	K09260//MADS-box transcription enhancer factor 2A;K09260//MADS-box transcription enhancer factor 2A;K09260//MADS-box transcription enhancer factor 2A;K09260//MADS-box transcription enhancer factor 2A;K09260//MADS-box transcription enhancer factor 2A;K09260//MADS-box transcription enhancer factor 2A;K09260//MADS-box transcription enhancer factor 2A;K09260//MADS-box transcription enhancer factor 2A…	NA
LOC110732255	K19039//E3 ubiquitin-protein ligase ATL7/58/59 [EC:2.3.2.27]	NA
LOC110739424	K15718//linoleate 9S-lipoxygenase [EC:1.13.11.58]+ko00591//Linoleic acid metabolism;K08176//MFS transporter, PHS family, inorganic phosphate transporter;K09754//5-O-(4-coumaroyl)-D-quinate 3'-monooxygenase [EC:1.14.14.96]+ko01100//Metabolic pathways+ko01110//Biosynthesis of secondary metabolites+ko00940//Phenylpropanoid biosynthesis+ko00941//Flavonoid biosynthesis+ko00945//Stilbenoid, diarylhepta…	NA
BGI_novel_G003235	K03257//translation initiation factor 4A+ko03013//RNA transport	NA
LOC110684055	K01803//triosephosphate isomerase (TIM) [EC:5.3.1.1]+ko00010//Glycolysis / Gluconeogenesis+ko01230//Biosynthesis of amino acids+ko01100//Metabolic pathways+ko00051//Fructose and mannose metabolism+ko01110//Biosynthesis of secondary metabolites+ko00710//Carbon fixation in photosynthetic organisms+ko01200//Carbon metabolism+ko00562//Inositol phosphate metabolism	GO:0006096//glycolytic process;GO:1901360//organic cyclic compound metabolic process;GO:0044281//small molecule metabolic process;GO:0006753//nucleoside phosphate metabolic process;GO:0006139//nucleobase-containing compound metabolic process;GO:0009056//catabolic process;GO:0009150//purine ribonucleotide metabolic process;GO:0006807//nitrogen compound metabolic process;GO:0044238//primary metabol…
LOC110684502	K05747//Wiskott-Aldrich syndrome protein+ko04144//Endocytosis	GO:0071944//cell periphery;GO:0016021//integral component of membrane;GO:0043231//intracellular membrane-bounded organelle;GO:0005737//cytoplasm;GO:0005634//nucleus;GO:0005886//plasma membrane;GO:0005829//cytosol;GO:0043229//intracellular organelle;GO:0031224//intrinsic component of membrane;GO:0043226//organelle;GO:0110165//cellular anatomical entity;GO:0005622//intracellular;GO:0016020//membran…
LOC110682235	K05681//ATP-binding cassette, subfamily G (WHITE), member 2+ko02010//ABC transporters;K05681//ATP-binding cassette, subfamily G (WHITE), member 2+ko02010//ABC transporters	GO:0031224//intrinsic component of membrane;GO:0110165//cellular anatomical entity;GO:0016021//integral component of membrane;GO:0016020//membrane;GO:0005488//binding;GO:0017076//purine nucleotide binding;GO:0016817//hydrolase activity, acting on acid anhydrides;GO:0032553//ribonucleotide binding;GO:0030554//adenyl nucleotide binding;GO:0016462//pyrophosphatase activity;GO:0035639//purine ribonuc…
LOC110726605	K11975//E3 ubiquitin-protein ligase RNF144 [EC:2.3.2.31]	NA
LOC110700354	K17422//large subunit ribosomal protein L41;K00924//kinase [EC:2.7.1.-]	GO:0016020//membrane;GO:0016021//integral component of membrane;GO:0031224//intrinsic component of membrane;GO:0110165//cellular anatomical entity;GO:0032559//adenyl ribonucleotide binding;GO:0032555//purine ribonucleotide binding;GO:0030554//adenyl nucleotide binding;GO:0035639//purine ribonucleoside triphosphate binding;GO:0016301//kinase activity;GO:0043168//anion binding;GO:0032553//ribonucle…
LOC110684112	K22534//PR domain zinc finger protein 5	GO:0005488//binding;GO:0003676//nucleic acid binding;GO:0097159//organic cyclic compound binding;GO:1901363//heterocyclic compound binding;
LOC110729392	K11323//histone arginine demethylase JMJD6 [EC:1.14.11.-];K11323//histone arginine demethylase JMJD6 [EC:1.14.11.-]	GO:0003676//nucleic acid binding;GO:0005488//binding;GO:1901363//heterocyclic compound binding;GO:0097159//organic cyclic compound binding;
LOC110705597	K09834//tocopherol cyclase [EC:5.5.1.24]+ko00130//Ubiquinone and other terpenoid-quinone biosynthesis+ko01100//Metabolic pathways+ko01110//Biosynthesis of secondary metabolites	GO:0009976//tocopherol cyclase activity;GO:0003824//catalytic activity;GO:0009975//cyclase activity;
LOC110727774	K15503//serine/threonine-protein phosphatase 6 regulatory ankyrin repeat subunit B;K09420//transcriptional activator Myb;K15503//serine/threonine-protein phosphatase 6 regulatory ankyrin repeat subunit B	NA
LOC110739507	K11982//E3 ubiquitin-protein ligase RNF115/126 [EC:2.3.2.27];K11982//E3 ubiquitin-protein ligase RNF115/126 [EC:2.3.2.27]	NA
LOC110685513	K15203//general transcription factor 3C polypeptide 6;K15203//general transcription factor 3C polypeptide 6	NA
LOC110734358	K22804//structural maintenance of chromosomes protein 6;K01188//beta-glucosidase [EC:3.2.1.21]+ko01100//Metabolic pathways+ko00500//Starch and sucrose metabolism+ko01110//Biosynthesis of secondary metabolites+ko00460//Cyanoamino acid metabolism+ko00940//Phenylpropanoid biosynthesis;K11650//SWI/SNF-related matrix-associated actin-dependent regulator of chromatin subfamily D;K01590//histidine decar…	GO:0004523//RNA-DNA hybrid ribonuclease activity;GO:0004519//endonuclease activity;GO:0016893//endonuclease activity, active with either ribo- or deoxyribonucleic acids and producing 5'-phosphomonoesters;GO:0016788//hydrolase activity, acting on ester bonds;GO:0003824//catalytic activity;GO:0016891//endoribonuclease activity, producing 5'-phosphomonoesters;GO:0003676//nucleic acid binding;GO:0004…
LOC110714043	K08237//hydroquinone glucosyltransferase [EC:2.4.1.218]	GO:0003824//catalytic activity;GO:0016740//transferase activity;GO:0016758//transferase activity, transferring hexosyl groups;GO:0016757//transferase activity, transferring glycosyl groups;
LOC110689392	K12837//splicing factor U2AF 65 kDa subunit+ko03040//Spliceosome	GO:0003676//nucleic acid binding;GO:0005488//binding;GO:1901363//heterocyclic compound binding;GO:0003723//RNA binding;GO:0097159//organic cyclic compound binding;
LOC110702782	K17710//pentatricopeptide repeat domain-containing protein 1;K17964//leucine-rich PPR motif-containing protein, mitochondrial;K17710//pentatricopeptide repeat domain-containing protein 1;K17964//leucine-rich PPR motif-containing protein, mitochondrial	NA
LOC110731320	K19891//glucan endo-1,3-beta-glucosidase 1/2/3 [EC:3.2.1.39]+ko00500//Starch and sucrose metabolism	GO:0071704//organic substance metabolic process;GO:0005975//carbohydrate metabolic process;GO:0008152//metabolic process;GO:0044238//primary metabolic process;GO:0004553//hydrolase activity, hydrolyzing O-glycosyl compounds;GO:0003824//catalytic activity;GO:0016787//hydrolase activity;GO:0016798//hydrolase activity, acting on glycosyl bonds;
LOC110709215	K17604//zinc finger SWIM domain-containing protein 3	NA
LOC110707828	K12355//coniferyl-aldehyde dehydrogenase [EC:1.2.1.68]+ko00940//Phenylpropanoid biosynthesis	GO:0016903//oxidoreductase activity, acting on the aldehyde or oxo group of donors;GO:0016491//oxidoreductase activity;GO:0003824//catalytic activity;GO:0016620//oxidoreductase activity, acting on the aldehyde or oxo group of donors, NAD or NADP as acceptor;
BGI_novel_G000166	K01859//chalcone isomerase [EC:5.5.1.6]+ko01100//Metabolic pathways+ko01110//Biosynthesis of secondary metabolites+ko00941//Flavonoid biosynthesis;K04733//interleukin-1 receptor-associated kinase 4 [EC:2.7.11.1]	GO:0016021//integral component of membrane;GO:0016020//membrane;GO:0110165//cellular anatomical entity;GO:0031224//intrinsic component of membrane;GO:0046872//metal ion binding;GO:0043169//cation binding;GO:0005488//binding;GO:0005509//calcium ion binding;GO:0043167//ion binding;
BGI_novel_G005388	K04499//RuvB-like protein 1 (pontin 52)	GO:0031248//protein acetyltransferase complex;GO:0031974//membrane-enclosed lumen;GO:1902494//catalytic complex;GO:0043233//organelle lumen;GO:0070013//intracellular organelle lumen;GO:0000228//nuclear chromosome;GO:0035267//NuA4 histone acetyltransferase complex;GO:0110165//cellular anatomical entity;GO:0005654//nucleoplasm;GO:1902562//H4 histone acetyltransferase complex;GO:0043226//organelle;G…
LOC110685312	K10706//senataxin [EC:3.6.4.-]	GO:0036094//small molecule binding;GO:0035639//purine ribonucleoside triphosphate binding;GO:0005524//ATP binding;GO:0030554//adenyl nucleotide binding;GO:0000166//nucleotide binding;GO:0032553//ribonucleotide binding;GO:0043168//anion binding;GO:0097159//organic cyclic compound binding;GO:1901363//heterocyclic compound binding;GO:0017076//purine nucleotide binding;GO:0005488//binding;GO:0043167/…
LOC110714582	K13203//zinc finger RNA-binding protein;K13203//zinc finger RNA-binding protein	GO:0005488//binding;GO:1901363//heterocyclic compound binding;GO:0097159//organic cyclic compound binding;GO:0003676//nucleic acid binding;GO:0046872//metal ion binding;GO:0046914//transition metal ion binding;GO:0008270//zinc ion binding;GO:0043169//cation binding;GO:0043167//ion binding;
LOC110740051	K00025//malate dehydrogenase [EC:1.1.1.37]+ko00020//Citrate cycle (TCA cycle)+ko01100//Metabolic pathways+ko01110//Biosynthesis of secondary metabolites+ko00710//Carbon fixation in photosynthetic organisms+ko00620//Pyruvate metabolism+ko00270//Cysteine and methionine metabolism+ko01200//Carbon metabolism+ko00630//Glyoxylate and dicarboxylate metabolism	GO:0006810//transport;GO:0009987//cellular process;GO:0051179//localization;GO:0051234//establishment of localization;GO:0055085//transmembrane transport;GO:0110165//cellular anatomical entity;GO:0016020//membrane;GO:0016021//integral component of membrane;GO:0031224//intrinsic component of membrane;
LOC110715593	K14004//protein transport protein SEC13+ko04141//Protein processing in endoplasmic reticulum+ko03013//RNA transport	GO:0015031//protein transport;GO:0071705//nitrogen compound transport;GO:0042886//amide transport;GO:0033036//macromolecule localization;GO:0045184//establishment of protein localization;GO:0071702//organic substance transport;GO:0006810//transport;GO:0008104//protein localization;GO:0051234//establishment of localization;GO:0051179//localization;GO:0015833//peptide transport;GO:0005198//structur…
LOC110723021	K06067//histone deacetylase 1/2 [EC:3.5.1.98];K06067//histone deacetylase 1/2 [EC:3.5.1.98]	GO:0043229//intracellular organelle;GO:0043227//membrane-bounded organelle;GO:0043231//intracellular membrane-bounded organelle;GO:0005634//nucleus;GO:0110165//cellular anatomical entity;GO:0043226//organelle;GO:0005622//intracellular;GO:0031078//histone deacetylase activity (H3-K14 specific);GO:0005488//binding;GO:0016810//hydrolase activity, acting on carbon-nitrogen (but not peptide) bonds;GO:…
LOC110731856	K21952//CASK-interacting protein	NA
LOC110730063	NA	GO:0051234//establishment of localization;GO:0006810//transport;GO:0051179//localization;GO:0009987//cellular process;GO:0055085//transmembrane transport;GO:0110165//cellular anatomical entity;GO:0031224//intrinsic component of membrane;GO:0016020//membrane;GO:0016021//integral component of membrane;
LOC110734417	K14484//auxin-responsive protein IAA+ko04075//Plant hormone signal transduction	GO:0010033//response to organic substance;GO:0009733//response to auxin;GO:2001141//regulation of RNA biosynthetic process;GO:0031326//regulation of cellular biosynthetic process;GO:0080090//regulation of primary metabolic process;GO:0071495//cellular response to endogenous stimulus;GO:0060255//regulation of macromolecule metabolic process;GO:0009987//cellular process;GO:0010556//regulation of ma…
LOC110722956	K12844//U4/U6 small nuclear ribonucleoprotein PRP31+ko03040//Spliceosome	NA
LOC110692347	K13420//LRR receptor-like serine/threonine-protein kinase FLS2 [EC:2.7.11.1]+ko04016//MAPK signaling pathway - plant+ko04626//Plant-pathogen interaction	GO:0016020//membrane;GO:0031224//intrinsic component of membrane;GO:0110165//cellular anatomical entity;GO:0016021//integral component of membrane;GO:0097367//carbohydrate derivative binding;GO:0004672//protein kinase activity;GO:0016773//phosphotransferase activity, alcohol group as acceptor;GO:0003824//catalytic activity;GO:0140096//catalytic activity, acting on a protein;GO:0043168//anion bind…
LOC110729732	K15631//molybdenum cofactor sulfurtransferase [EC:2.8.1.9]+ko00790//Folate biosynthesis	GO:0003824//catalytic activity;
LOC110721998	K22696//protein-lysine N-methyltransferase EEF2KMT [EC:2.1.1.-];K08857//NIMA (never in mitosis gene a)-related kinase 1/4/5 [EC:2.7.11.1]	NA
BGI_novel_G003485	K00477//phytanoyl-CoA hydroxylase [EC:1.14.11.18]+ko04146//Peroxisome	NA
BGI_novel_G001191	K10882//crossover junction endonuclease EME1 [EC:3.1.22.-]+ko03440//Homologous recombination	NA
LOC110691446	K09529//DnaJ homolog subfamily C member 9	NA
LOC110691865	K14638//solute carrier family 15 (peptide/histidine transporter), member 3/4;K14638//solute carrier family 15 (peptide/histidine transporter), member 3/4	GO:0031224//intrinsic component of membrane;GO:0016020//membrane;GO:0110165//cellular anatomical entity;GO:0016021//integral component of membrane;GO:0005215//transporter activity;GO:0022857//transmembrane transporter activity;
LOC110725722	K09526//DnaJ homolog subfamily C member 6+ko04144//Endocytosis;K18626//trichohyalin;K09526//DnaJ homolog subfamily C member 6+ko04144//Endocytosis;K18626//trichohyalin	NA
LOC110686481	K17086//transmembrane 9 superfamily member 2/4;K15255//ATP-dependent DNA helicase PIF1 [EC:3.6.4.12];K17604//zinc finger SWIM domain-containing protein 3	NA
LOC110728629	K13150//coilin;K00963//UTP--glucose-1-phosphate uridylyltransferase [EC:2.7.7.9]+ko00520//Amino sugar and nucleotide sugar metabolism+ko00040//Pentose and glucuronate interconversions+ko01100//Metabolic pathways+ko00052//Galactose metabolism+ko00500//Starch and sucrose metabolism;K09338//homeobox-leucine zipper protein;K00103//L-gulonolactone oxidase [EC:1.1.3.8]+ko01100//Metabolic pathways+ko000…	GO:0097159//organic cyclic compound binding;GO:0005488//binding;GO:0003676//nucleic acid binding;GO:1901363//heterocyclic compound binding;
LOC110704719	K01303//acylaminoacyl-peptidase [EC:3.4.19.1];K08176//MFS transporter, PHS family, inorganic phosphate transporter;K00799//glutathione S-transferase [EC:2.5.1.18]+ko00480//Glutathione metabolism	NA
LOC110722644	K20854//hydroxyproline O-galactosyltransferase HPGT [EC:2.4.1.-]	GO:0036211//protein modification process;GO:1901135//carbohydrate derivative metabolic process;GO:0044238//primary metabolic process;GO:0019538//protein metabolic process;GO:0008152//metabolic process;GO:1901566//organonitrogen compound biosynthetic process;GO:0043412//macromolecule modification;GO:1901576//organic substance biosynthetic process;GO:0009100//glycoprotein metabolic process;GO:00099…
LOC110738355	K13412//calcium-dependent protein kinase [EC:2.7.11.1]+ko04626//Plant-pathogen interaction	GO:0043169//cation binding;GO:0005488//binding;GO:0043167//ion binding;GO:0005509//calcium ion binding;GO:0046872//metal ion binding;
LOC110693452	K11294//nucleolin	NA
BGI_novel_G002079	K01881//prolyl-tRNA synthetase [EC:6.1.1.15]+ko00970//Aminoacyl-tRNA biosynthesis;K04733//interleukin-1 receptor-associated kinase 4 [EC:2.7.11.1];K12447//UDP-sugar pyrophosphorylase [EC:2.7.7.64]+ko00520//Amino sugar and nucleotide sugar metabolism+ko00040//Pentose and glucuronate interconversions+ko01100//Metabolic pathways+ko00052//Galactose metabolism+ko00053//Ascorbate and aldarate metabolism	NA
LOC110718964	K04733//interleukin-1 receptor-associated kinase 4 [EC:2.7.11.1];K18485//myogenic factor 6;K20558//transcription factor SPEECHLESS+ko04016//MAPK signaling pathway - plant;K00991//2-C-methyl-D-erythritol 4-phosphate cytidylyltransferase [EC:2.7.7.60]+ko00900//Terpenoid backbone biosynthesis+ko01100//Metabolic pathways+ko01110//Biosynthesis of secondary metabolites	NA
LOC110731390	K10862//tyrosyl-DNA phosphodiesterase 1 [EC:3.1.4.-];K10862//tyrosyl-DNA phosphodiesterase 1 [EC:3.1.4.-];K10862//tyrosyl-DNA phosphodiesterase 1 [EC:3.1.4.-];K10862//tyrosyl-DNA phosphodiesterase 1 [EC:3.1.4.-];K10862//tyrosyl-DNA phosphodiesterase 1 [EC:3.1.4.-]	GO:0046483//heterocycle metabolic process;GO:0006950//response to stress;GO:0006725//cellular aromatic compound metabolic process;GO:1901360//organic cyclic compound metabolic process;GO:0071704//organic substance metabolic process;GO:0006139//nucleobase-containing compound metabolic process;GO:0044237//cellular metabolic process;GO:0050896//response to stimulus;GO:0044238//primary metabolic proc…
LOC110730431	NA	GO:0008152//metabolic process;GO:0032259//methylation;GO:0016020//membrane;GO:0016021//integral component of membrane;GO:0031224//intrinsic component of membrane;GO:0110165//cellular anatomical entity;GO:0016741//transferase activity, transferring one-carbon groups;GO:0003824//catalytic activity;GO:0008168//methyltransferase activity;GO:0016740//transferase activity;
LOC110739218	K00949//thiamine pyrophosphokinase [EC:2.7.6.2]+ko01100//Metabolic pathways+ko00730//Thiamine metabolism;K00949//thiamine pyrophosphokinase [EC:2.7.6.2]+ko01100//Metabolic pathways+ko00730//Thiamine metabolism	GO:0071704//organic substance metabolic process;GO:1901566//organonitrogen compound biosynthetic process;GO:0009058//biosynthetic process;GO:0019438//aromatic compound biosynthetic process;GO:1901360//organic cyclic compound metabolic process;GO:0006772//thiamine metabolic process;GO:0006796//phosphate-containing compound metabolic process;GO:0044271//cellular nitrogen compound biosynthetic proce…
LOC110734252	K00648//3-oxoacyl-[acyl-carrier-protein] synthase III [EC:2.3.1.180]+ko01100//Metabolic pathways+ko00061//Fatty acid biosynthesis+ko01212//Fatty acid metabolism	GO:0044237//cellular metabolic process;GO:0006082//organic acid metabolic process;GO:0008610//lipid biosynthetic process;GO:0044281//small molecule metabolic process;GO:1901576//organic substance biosynthetic process;GO:0044249//cellular biosynthetic process;GO:0006631//fatty acid metabolic process;GO:0044255//cellular lipid metabolic process;GO:0006633//fatty acid biosynthetic process;GO:0071704…
LOC110720969	K22649//B-cell CLL/lymphoma 9 protein;K22649//B-cell CLL/lymphoma 9 protein;K22649//B-cell CLL/lymphoma 9 protein;K22649//B-cell CLL/lymphoma 9 protein;K22649//B-cell CLL/lymphoma 9 protein	NA
LOC110733608	K14007//protein transport protein SEC24+ko04141//Protein processing in endoplasmic reticulum;K14007//protein transport protein SEC24+ko04141//Protein processing in endoplasmic reticulum	GO:0071702//organic substance transport;GO:0051649//establishment of localization in cell;GO:0009987//cellular process;GO:0070727//cellular macromolecule localization;GO:0048193//Golgi vesicle transport;GO:0006888//endoplasmic reticulum to Golgi vesicle-mediated transport;GO:0051179//localization;GO:0015031//protein transport;GO:0051234//establishment of localization;GO:0051641//cellular localiza…
LOC110724739	K03979//GTPase [EC:3.6.5.-];K03979//GTPase [EC:3.6.5.-];K03979//GTPase [EC:3.6.5.-];K03979//GTPase [EC:3.6.5.-];K03979//GTPase [EC:3.6.5.-];K03979//GTPase [EC:3.6.5.-];K03979//GTPase [EC:3.6.5.-]	GO:0032549//ribonucleoside binding;GO:0017076//purine nucleotide binding;GO:0097367//carbohydrate derivative binding;GO:0019001//guanyl nucleotide binding;GO:0000166//nucleotide binding;GO:0036094//small molecule binding;GO:0043167//ion binding;GO:0097159//organic cyclic compound binding;GO:0043168//anion binding;GO:0001882//nucleoside binding;GO:0005488//binding;GO:0032561//guanyl ribonucleotide…
LOC110700637	NA	GO:0016021//integral component of membrane;GO:0031224//intrinsic component of membrane;GO:0016020//membrane;GO:0110165//cellular anatomical entity;
LOC110720260	K17964//leucine-rich PPR motif-containing protein, mitochondrial;K17964//leucine-rich PPR motif-containing protein, mitochondrial	NA
LOC110733690	K01868//threonyl-tRNA synthetase [EC:6.1.1.3]+ko00970//Aminoacyl-tRNA biosynthesis	NA
LOC110722095	K01214//isoamylase [EC:3.2.1.68]+ko01100//Metabolic pathways+ko00500//Starch and sucrose metabolism+ko01110//Biosynthesis of secondary metabolites	GO:0005975//carbohydrate metabolic process;GO:0008152//metabolic process;GO:0044238//primary metabolic process;GO:0071704//organic substance metabolic process;GO:0004553//hydrolase activity, hydrolyzing O-glycosyl compounds;GO:0003824//catalytic activity;GO:0016798//hydrolase activity, acting on glycosyl bonds;GO:0016787//hydrolase activity;
BGI_novel_G002201	K15503//serine/threonine-protein phosphatase 6 regulatory ankyrin repeat subunit B;K15502//serine/threonine-protein phosphatase 6 regulatory ankyrin repeat subunit A	GO:0031224//intrinsic component of membrane;GO:0016021//integral component of membrane;GO:0016020//membrane;GO:0110165//cellular anatomical entity;
LOC110731892	K07466//replication factor A1+ko03420//Nucleotide excision repair+ko03030//DNA replication+ko03440//Homologous recombination+ko03430//Mismatch repair	NA
LOC110734765	K10756//replication factor C subunit 3/5+ko03420//Nucleotide excision repair+ko03030//DNA replication+ko03430//Mismatch repair;K22395//cinnamyl-alcohol dehydrogenase [EC:1.1.1.195]+ko01100//Metabolic pathways+ko01110//Biosynthesis of secondary metabolites+ko00940//Phenylpropanoid biosynthesis;K01303//acylaminoacyl-peptidase [EC:3.4.19.1];K14175//(3S,6E)-nerolidol synthase [EC:4.2.3.48]+ko00909//S…	NA
LOC110737038	NA	GO:0008080//N-acetyltransferase activity;GO:0016747//transferase activity, transferring acyl groups other than amino-acyl groups;GO:0016407//acetyltransferase activity;GO:0016746//transferase activity, transferring acyl groups;GO:0003824//catalytic activity;GO:0016410//N-acyltransferase activity;GO:0016740//transferase activity;
LOC110735139	K19891//glucan endo-1,3-beta-glucosidase 1/2/3 [EC:3.2.1.39]+ko00500//Starch and sucrose metabolism	GO:0044238//primary metabolic process;GO:0008152//metabolic process;GO:0071704//organic substance metabolic process;GO:0005975//carbohydrate metabolic process;GO:0031224//intrinsic component of membrane;GO:0110165//cellular anatomical entity;GO:0016021//integral component of membrane;GO:0016020//membrane;GO:0016798//hydrolase activity, acting on glycosyl bonds;GO:0004553//hydrolase activity, hydr…
LOC110710880	K09286//EREBP-like factor	GO:0043227//membrane-bounded organelle;GO:0110165//cellular anatomical entity;GO:0043231//intracellular membrane-bounded organelle;GO:0005622//intracellular;GO:0043226//organelle;GO:0043229//intracellular organelle;GO:0005634//nucleus;GO:0140110//transcription regulator activity;GO:0003676//nucleic acid binding;GO:1901363//heterocyclic compound binding;GO:0005488//binding;GO:0003677//DNA binding;…
LOC110714245	NA	GO:0110165//cellular anatomical entity;GO:0016020//membrane;GO:0031224//intrinsic component of membrane;GO:0016021//integral component of membrane;
LOC110704703	K13457//disease resistance protein RPM1+ko04626//Plant-pathogen interaction	NA
LOC110732897	K13508//glycerol-3-phosphate acyltransferase [EC:2.3.1.15 2.3.1.198]+ko01100//Metabolic pathways+ko01110//Biosynthesis of secondary metabolites+ko00564//Glycerophospholipid metabolism+ko00561//Glycerolipid metabolism	NA
LOC110696289	K20283//golgin subfamily A member 4;K20283//golgin subfamily A member 4	GO:0016021//integral component of membrane;GO:0016020//membrane;GO:0110165//cellular anatomical entity;GO:0031224//intrinsic component of membrane;
LOC110696415	K17604//zinc finger SWIM domain-containing protein 3	NA
LOC110715487	K22503//aspartyl-tRNA synthetase [EC:6.1.1.12]+ko00970//Aminoacyl-tRNA biosynthesis;K20290//conserved oligomeric Golgi complex subunit 3;K21919//BTB/POZ domain-containing protein KCTD9;K02575//MFS transporter, NNP family, nitrate/nitrite transporter+ko00910//Nitrogen metabolism;K20368//protein cornichon;K00384//thioredoxin reductase (NADPH) [EC:1.8.1.9]+ko00450//Selenocompound metabolism;K00799//…	NA
LOC110705416	K22733//magnesium transporter;K01188//beta-glucosidase [EC:3.2.1.21]+ko01100//Metabolic pathways+ko00500//Starch and sucrose metabolism+ko01110//Biosynthesis of secondary metabolites+ko00460//Cyanoamino acid metabolism+ko00940//Phenylpropanoid biosynthesis	GO:0110165//cellular anatomical entity;GO:0043229//intracellular organelle;GO:0005769//early endosome;GO:0043227//membrane-bounded organelle;GO:0012505//endomembrane system;GO:0031982//vesicle;GO:0005886//plasma membrane;GO:0043226//organelle;GO:0031224//intrinsic component of membrane;GO:0097708//intracellular vesicle;GO:0016021//integral component of membrane;GO:0071944//cell periphery;GO:00057…
LOC110719957	K00854//xylulokinase [EC:2.7.1.17]+ko00040//Pentose and glucuronate interconversions+ko01100//Metabolic pathways	GO:0042732//D-xylose metabolic process;GO:0008152//metabolic process;GO:0005975//carbohydrate metabolic process;GO:0044281//small molecule metabolic process;GO:0044238//primary metabolic process;GO:0019321//pentose metabolic process;GO:0071704//organic substance metabolic process;GO:0005996//monosaccharide metabolic process;GO:0004856//xylulokinase activity;GO:0016773//phosphotransferase activity…
LOC110688720	K22522//cytokinin riboside 5'-monophosphate phosphoribohydrolase [EC:3.2.2.-]	GO:0065008//regulation of biological quality;GO:0042446//hormone biosynthetic process;GO:0010817//regulation of hormone levels;GO:0065007//biological regulation;GO:0009308//amine metabolic process;GO:0009987//cellular process;GO:0034754//cellular hormone metabolic process;GO:0046483//heterocycle metabolic process;GO:0006807//nitrogen compound metabolic process;GO:0071704//organic substance metabo…
LOC110712185	K19613//leucine-rich repeat protein SHOC2;K15078//structure-specific endonuclease subunit SLX1 [EC:3.6.1.-]	NA
LOC110736771	K19589//release factor glutamine methyltransferase [EC:2.1.1.297]	NA
LOC110734278	K17710//pentatricopeptide repeat domain-containing protein 1;K17710//pentatricopeptide repeat domain-containing protein 1	NA
LOC110684103	K05765//cofilin;K11252//histone H2B	GO:0006996//organelle organization;GO:0043624//cellular protein complex disassembly;GO:0030036//actin cytoskeleton organization;GO:0097435//supramolecular fiber organization;GO:0043933//protein-containing complex subunit organization;GO:0022411//cellular component disassembly;GO:0007015//actin filament organization;GO:0032984//protein-containing complex disassembly;GO:0030042//actin filament depo…
LOC110708039	K14782//protein AATF/BFR2;K17046//protein DEK	NA
LOC110697811	K22030//leiomodin;K20100//YTH domain-containing protein 1;K10638//E3 ubiquitin-protein ligase UHRF1 [EC:2.3.2.27];K03006//DNA-directed RNA polymerase II subunit RPB1 [EC:2.7.7.6]+ko03020//RNA polymerase;K22030//leiomodin;K20100//YTH domain-containing protein 1;K10638//E3 ubiquitin-protein ligase UHRF1 [EC:2.3.2.27];K03006//DNA-directed RNA polymerase II subunit RPB1 [EC:2.7.7.6]+ko03020//RNA poly…	NA
LOC110736694	K05302//N-lysine methyltransferase SETD6 [EC:2.1.1.-];K05302//N-lysine methyltransferase SETD6 [EC:2.1.1.-];K05302//N-lysine methyltransferase SETD6 [EC:2.1.1.-]	GO:0018026//peptidyl-lysine monomethylation;GO:0008152//metabolic process;GO:0009987//cellular process;GO:0044267//cellular protein metabolic process;GO:0036211//protein modification process;GO:0018022//peptidyl-lysine methylation;GO:0043414//macromolecule methylation;GO:0019538//protein metabolic process;GO:0008213//protein alkylation;GO:0044260//cellular macromolecule metabolic process;GO:00064…
BGI_novel_G001666	K13412//calcium-dependent protein kinase [EC:2.7.11.1]+ko04626//Plant-pathogen interaction	GO:0110165//cellular anatomical entity;GO:0016020//membrane;GO:0016021//integral component of membrane;GO:0031224//intrinsic component of membrane;GO:0097159//organic cyclic compound binding;GO:0032559//adenyl ribonucleotide binding;GO:0140096//catalytic activity, acting on a protein;GO:0030554//adenyl nucleotide binding;GO:1901363//heterocyclic compound binding;GO:0017076//purine nucleotide bind…
LOC110721338	K13907//cystatin-A/B;K13899//cystatin-C	NA
LOC110682216	K14684//solute carrier family 25 (mitochondrial phosphate transporter), member 23/24/25/41;K14684//solute carrier family 25 (mitochondrial phosphate transporter), member 23/24/25/41	GO:0016021//integral component of membrane;GO:0016020//membrane;GO:0110165//cellular anatomical entity;GO:0031224//intrinsic component of membrane;GO:0000295//adenine nucleotide transmembrane transporter activity;GO:0015075//ion transmembrane transporter activity;GO:0005347//ATP transmembrane transporter activity;GO:0015216//purine nucleotide transmembrane transporter activity;GO:0022857//transme…
LOC110702150	K03678//exosome complex component RRP45+ko03018//RNA degradation;K03678//exosome complex component RRP45+ko03018//RNA degradation	GO:0016070//RNA metabolic process;GO:0009987//cellular process;GO:0044238//primary metabolic process;GO:0006396//RNA processing;GO:0006139//nucleobase-containing compound metabolic process;GO:0010467//gene expression;GO:0006807//nitrogen compound metabolic process;GO:0008152//metabolic process;GO:0090304//nucleic acid metabolic process;GO:0034641//cellular nitrogen compound metabolic process;GO:1…
LOC110735939	K03549//KUP system potassium uptake protein	NA
LOC110698397	K01303//acylaminoacyl-peptidase [EC:3.4.19.1];K15711//SWI/SNF-related matrix-associated actin-dependent regulator of chromatin subfamily A3 [EC:3.6.4.- 2.3.2.27];K00799//glutathione S-transferase [EC:2.5.1.18]+ko00480//Glutathione metabolism;K08176//MFS transporter, PHS family, inorganic phosphate transporter	NA
LOC110721053	K00430//peroxidase [EC:1.11.1.7]+ko01100//Metabolic pathways+ko01110//Biosynthesis of secondary metabolites+ko00940//Phenylpropanoid biosynthesis	GO:0044248//cellular catabolic process;GO:0006979//response to oxidative stress;GO:0006950//response to stress;GO:0044237//cellular metabolic process;GO:0009987//cellular process;GO:0042744//hydrogen peroxide catabolic process;GO:0042743//hydrogen peroxide metabolic process;GO:0009056//catabolic process;GO:0072593//reactive oxygen species metabolic process;GO:0008152//metabolic process;GO:0050896…
BGI_novel_G001286	K12857//Prp8 binding protein+ko03040//Spliceosome	NA
LOC110717098	K00472//prolyl 4-hydroxylase [EC:1.14.11.2]+ko00330//Arginine and proline metabolism+ko01100//Metabolic pathways	GO:0110165//cellular anatomical entity;GO:0016020//membrane;GO:0016021//integral component of membrane;GO:0031224//intrinsic component of membrane;GO:0048029//monosaccharide binding;GO:0016491//oxidoreductase activity;GO:0046914//transition metal ion binding;GO:0043167//ion binding;GO:0043168//anion binding;GO:0003824//catalytic activity;GO:0031406//carboxylic acid binding;GO:0043177//organic aci…
LOC110705220	K17710//pentatricopeptide repeat domain-containing protein 1	GO:0010608//posttranscriptional regulation of gene expression;GO:1902373//negative regulation of mRNA catabolic process;GO:0048255//mRNA stabilization;GO:0051172//negative regulation of nitrogen compound metabolic process;GO:1902369//negative regulation of RNA catabolic process;GO:0051252//regulation of RNA metabolic process;GO:0031329//regulation of cellular catabolic process;GO:0080090//regulat…
LOC110696694	K04125//gibberellin 2beta-dioxygenase [EC:1.14.11.13]+ko00904//Diterpenoid biosynthesis+ko01110//Biosynthesis of secondary metabolites;K14513//ethylene-insensitive protein 2+ko04016//MAPK signaling pathway - plant+ko04075//Plant hormone signal transduction;K20538//mitogen-activated protein kinase 8 [EC:2.7.11.24]+ko04016//MAPK signaling pathway - plant;K03686//molecular chaperone DnaJ	GO:0009987//cellular process;GO:0044238//primary metabolic process;GO:0046483//heterocycle metabolic process;GO:0090304//nucleic acid metabolic process;GO:0044237//cellular metabolic process;GO:0006725//cellular aromatic compound metabolic process;GO:0006807//nitrogen compound metabolic process;GO:0044260//cellular macromolecule metabolic process;GO:1901360//organic cyclic compound metabolic proc…
LOC110732269	NA	GO:0051205//protein insertion into membrane;GO:0034613//cellular protein localization;GO:0070585//protein localization to mitochondrion;GO:0072657//protein localization to membrane;GO:0051204//protein insertion into mitochondrial membrane;GO:0072655//establishment of protein localization to mitochondrion;GO:0071702//organic substance transport;GO:0006886//intracellular protein transport;GO:001604…
LOC110738791	NA	GO:0043231//intracellular membrane-bounded organelle;GO:0043227//membrane-bounded organelle;GO:0043229//intracellular organelle;GO:0005634//nucleus;GO:0043226//organelle;GO:0005622//intracellular;GO:0110165//cellular anatomical entity;GO:1901363//heterocyclic compound binding;GO:0097159//organic cyclic compound binding;GO:0005488//binding;GO:0003676//nucleic acid binding;GO:0003677//DNA binding;
LOC110722920	K17275//plastin-1	NA
LOC110684405	K00789//S-adenosylmethionine synthetase [EC:2.5.1.6]+ko01230//Biosynthesis of amino acids+ko01100//Metabolic pathways+ko01110//Biosynthesis of secondary metabolites+ko00270//Cysteine and methionine metabolism;K00789//S-adenosylmethionine synthetase [EC:2.5.1.6]+ko01230//Biosynthesis of amino acids+ko01100//Metabolic pathways+ko01110//Biosynthesis of secondary metabolites+ko00270//Cysteine and met…	NA
LOC110735060	K21867//potassium channel	GO:0065007//biological regulation;GO:0051049//regulation of transport;GO:0034762//regulation of transmembrane transport;GO:0050794//regulation of cellular process;GO:0050789//regulation of biological process;GO:0043269//regulation of ion transport;GO:0034765//regulation of ion transmembrane transport;GO:0032879//regulation of localization;GO:0016020//membrane;GO:0110165//cellular anatomical entit…
LOC110718950	K02980//small subunit ribosomal protein S29e+ko03010//Ribosome	GO:0044237//cellular metabolic process;GO:0043603//cellular amide metabolic process;GO:0008152//metabolic process;GO:0034645//cellular macromolecule biosynthetic process;GO:0009058//biosynthetic process;GO:1901576//organic substance biosynthetic process;GO:1901566//organonitrogen compound biosynthetic process;GO:0034641//cellular nitrogen compound metabolic process;GO:0006807//nitrogen compound m…
LOC110718928	K02184//formin 2	NA
LOC110724158	K02325//DNA polymerase epsilon subunit 2 [EC:2.7.7.7]+ko03420//Nucleotide excision repair+ko03030//DNA replication+ko03410//Base excision repair;K02325//DNA polymerase epsilon subunit 2 [EC:2.7.7.7]+ko03420//Nucleotide excision repair+ko03030//DNA replication+ko03410//Base excision repair;K02325//DNA polymerase epsilon subunit 2 [EC:2.7.7.7]+ko03420//Nucleotide excision repair+ko03030//DNA replic…	NA
LOC110725089	K20667//beta-amyrin 28-monooxygenase [EC:1.14.14.126]	NA
LOC110702227	K02925//large subunit ribosomal protein L3e+ko03010//Ribosome;K12524//bifunctional aspartokinase / homoserine dehydrogenase 1 [EC:2.7.2.4 1.1.1.3]+ko00300//Lysine biosynthesis+ko01230//Biosynthesis of amino acids+ko01100//Metabolic pathways+ko01110//Biosynthesis of secondary metabolites+ko00261//Monobactam biosynthesis+ko00260//Glycine, serine and threonine metabolism+ko00270//Cysteine and methio…	NA
LOC110700609	K08910//light-harvesting complex I chlorophyll a/b binding protein 4+ko00196//Photosynthesis - antenna proteins	GO:0050896//response to stimulus;GO:0009987//cellular process;GO:0009409//response to cold;GO:0009644//response to high light intensity;GO:0036211//protein modification process;GO:0009266//response to temperature stimulus;GO:0009314//response to radiation;GO:0006464//cellular protein modification process;GO:0009416//response to light stimulus;GO:0015979//photosynthesis;GO:0006091//generation of p…
LOC110690480	K04733//interleukin-1 receptor-associated kinase 4 [EC:2.7.11.1]	NA
LOC110684996	K05278//flavonol synthase [EC:1.14.20.6]+ko01100//Metabolic pathways+ko01110//Biosynthesis of secondary metabolites+ko00941//Flavonoid biosynthesis	NA
LOC110717747	K19613//leucine-rich repeat protein SHOC2;K15078//structure-specific endonuclease subunit SLX1 [EC:3.6.1.-]	NA
LOC110689468	K17535//serine/threonine-protein kinase TNNI3K [EC:2.7.11.1];K15190//7SK snRNA methylphosphate capping enzyme [EC:2.1.1.-];K09833//homogentisate phytyltransferase / homogentisate geranylgeranyltransferase [EC:2.5.1.115 2.5.1.116]+ko00130//Ubiquinone and other terpenoid-quinone biosynthesis+ko01100//Metabolic pathways+ko01110//Biosynthesis of secondary metabolites;K01537//Ca2+-transporting ATPase …	NA
LOC110731695	K17604//zinc finger SWIM domain-containing protein 3;K17604//zinc finger SWIM domain-containing protein 3;K17604//zinc finger SWIM domain-containing protein 3;K17604//zinc finger SWIM domain-containing protein 3	NA
LOC110694824	NA	GO:0003755//peptidyl-prolyl cis-trans isomerase activity;GO:0140096//catalytic activity, acting on a protein;GO:0016859//cis-trans isomerase activity;GO:0003824//catalytic activity;GO:0016853//isomerase activity;
LOC110737002	K04565//superoxide dismutase, Cu-Zn family [EC:1.15.1.1]+ko04146//Peroxisome;K04565//superoxide dismutase, Cu-Zn family [EC:1.15.1.1]+ko04146//Peroxisome;K04565//superoxide dismutase, Cu-Zn family [EC:1.15.1.1]+ko04146//Peroxisome	GO:0005622//intracellular;GO:0110165//cellular anatomical entity;GO:0005737//cytoplasm;GO:0043169//cation binding;GO:0005488//binding;GO:0016209//antioxidant activity;GO:0046872//metal ion binding;GO:0003824//catalytic activity;GO:0043167//ion binding;GO:0016491//oxidoreductase activity;GO:0016721//oxidoreductase activity, acting on superoxide radicals as acceptor;GO:0004784//superoxide dismutase…
LOC110718053	K00384//thioredoxin reductase (NADPH) [EC:1.8.1.9]+ko00450//Selenocompound metabolism;K00799//glutathione S-transferase [EC:2.5.1.18]+ko00480//Glutathione metabolism;K20368//protein cornichon	NA
LOC110690407	K16221//transcription factor TCP21 (protein CCA1 HIKING EXPEDITION)+ko04712//Circadian rhythm - plant	GO:0003700//DNA-binding transcription factor activity;GO:0140110//transcription regulator activity;
LOC110732244	K14491//two-component response regulator ARR-B family+ko04075//Plant hormone signal transduction	NA
LOC110738767	NA	GO:0016020//membrane;GO:0110165//cellular anatomical entity;GO:0016021//integral component of membrane;GO:0031224//intrinsic component of membrane;
LOC110716261	K11437//type I protein arginine methyltransferase [EC:2.1.1.319]	GO:0016740//transferase activity;GO:0140096//catalytic activity, acting on a protein;GO:0003824//catalytic activity;GO:0016741//transferase activity, transferring one-carbon groups;GO:0008168//methyltransferase activity;GO:0008276//protein methyltransferase activity;GO:0016274//protein-arginine N-methyltransferase activity;GO:0008757//S-adenosylmethionine-dependent methyltransferase activity;GO:0…
LOC110698780	K01177//beta-amylase [EC:3.2.1.2]+ko00500//Starch and sucrose metabolism	GO:0044238//primary metabolic process;GO:0009056//catabolic process;GO:0008152//metabolic process;GO:0016052//carbohydrate catabolic process;GO:0000272//polysaccharide catabolic process;GO:0043170//macromolecule metabolic process;GO:0009057//macromolecule catabolic process;GO:0005975//carbohydrate metabolic process;GO:1901575//organic substance catabolic process;GO:0005976//polysaccharide metabol…
LOC110685271	K21249//UV radiation resistance-associated gene protein	NA
LOC110724754	K03671//thioredoxin 1	GO:0018904//ether metabolic process;GO:0065007//biological regulation;GO:0050789//regulation of biological process;GO:0071704//organic substance metabolic process;GO:0065008//regulation of biological quality;GO:0050794//regulation of cellular process;GO:0009987//cellular process;GO:0019725//cellular homeostasis;GO:0006662//glycerol ether metabolic process;GO:0042592//homeostatic process;GO:004428…
LOC110730859	K22832//1,3-beta-glucanosyltransferase GAS1 [EC:2.4.1.-];K03006//DNA-directed RNA polymerase II subunit RPB1 [EC:2.7.7.6]+ko03020//RNA polymerase	GO:0031224//intrinsic component of membrane;GO:0110165//cellular anatomical entity;GO:0016020//membrane;GO:0016021//integral component of membrane;
LOC110713161	K18187//protein PET100, fungi type	GO:0016043//cellular component organization;GO:0065003//protein-containing complex assembly;GO:0007005//mitochondrion organization;GO:0006996//organelle organization;GO:0022607//cellular component assembly;GO:0009987//cellular process;GO:0034622//cellular protein-containing complex assembly;GO:0043933//protein-containing complex subunit organization;GO:0008535//respiratory chain complex IV assemb…
LOC110717428	K01379//cathepsin D [EC:3.4.23.5];K01381//saccharopepsin [EC:3.4.23.25];K00924//kinase [EC:2.7.1.-];K01381//saccharopepsin [EC:3.4.23.25];K01379//cathepsin D [EC:3.4.23.5];K01379//cathepsin D [EC:3.4.23.5];K01381//saccharopepsin [EC:3.4.23.25];K01381//saccharopepsin [EC:3.4.23.25];K01379//cathepsin D [EC:3.4.23.5];K01379//cathepsin D [EC:3.4.23.5];K01381//saccharopepsin [EC:3.4.23.25];K01379//cat…	GO:0008233//peptidase activity;GO:0003824//catalytic activity;GO:0140096//catalytic activity, acting on a protein;GO:0004175//endopeptidase activity;GO:0016787//hydrolase activity;GO:0070011//peptidase activity, acting on L-amino acid peptides;GO:0004190//aspartic-type endopeptidase activity;GO:0070001//aspartic-type peptidase activity;
LOC110687753	K13456//RPM1-interacting protein 4+ko04626//Plant-pathogen interaction;K13456//RPM1-interacting protein 4+ko04626//Plant-pathogen interaction	NA
LOC110701315	K09580//protein disulfide-isomerase A1 [EC:5.3.4.1]+ko04141//Protein processing in endoplasmic reticulum	GO:0042592//homeostatic process;GO:0019725//cellular homeostasis;GO:0050789//regulation of biological process;GO:0045454//cell redox homeostasis;GO:0009987//cellular process;GO:0065007//biological regulation;GO:0050794//regulation of cellular process;GO:0065008//regulation of biological quality;GO:0140096//catalytic activity, acting on a protein;GO:0016864//intramolecular oxidoreductase activity,…
LOC110691070	K22285//oxysterol-binding protein-related protein 8	NA
LOC110713936	K14638//solute carrier family 15 (peptide/histidine transporter), member 3/4;K14638//solute carrier family 15 (peptide/histidine transporter), member 3/4	GO:0071705//nitrogen compound transport;GO:0071702//organic substance transport;GO:0042886//amide transport;GO:0015833//peptide transport;GO:0006857//oligopeptide transport;GO:0051179//localization;GO:0006810//transport;GO:0051234//establishment of localization;GO:0016020//membrane;GO:0031224//intrinsic component of membrane;GO:0016021//integral component of membrane;GO:0110165//cellular anatomic…
LOC110724589	K14802//phospholipid-transporting ATPase [EC:7.6.2.1]	GO:0010876//lipid localization;GO:0051179//localization;GO:0033036//macromolecule localization;GO:0015748//organophosphate ester transport;GO:0006820//anion transport;GO:0015914//phospholipid transport;GO:0006810//transport;GO:0006811//ion transport;GO:0015711//organic anion transport;GO:0051234//establishment of localization;GO:0071702//organic substance transport;GO:0006869//lipid transport;GO:…
LOC110723034	K19613//leucine-rich repeat protein SHOC2;K19613//leucine-rich repeat protein SHOC2;K19613//leucine-rich repeat protein SHOC2	NA
LOC110700416	K20471//coatomer subunit delta;K20471//coatomer subunit delta;K15190//7SK snRNA methylphosphate capping enzyme [EC:2.1.1.-];K20471//coatomer subunit delta	GO:0071704//organic substance metabolic process;GO:0016070//RNA metabolic process;GO:0090304//nucleic acid metabolic process;GO:0044237//cellular metabolic process;GO:0006139//nucleobase-containing compound metabolic process;GO:0006725//cellular aromatic compound metabolic process;GO:0034641//cellular nitrogen compound metabolic process;GO:0008152//metabolic process;GO:1901360//organic cyclic com…
LOC110715270	K20290//conserved oligomeric Golgi complex subunit 3;K05019//chloride channel, nucleotide-sensitive, 1A+ko03013//RNA transport;K20368//protein cornichon;K00384//thioredoxin reductase (NADPH) [EC:1.8.1.9]+ko00450//Selenocompound metabolism;K00799//glutathione S-transferase [EC:2.5.1.18]+ko00480//Glutathione metabolism	NA
LOC110735080	K20867//galacturonosyltransferase 12/13/14/15 [EC:2.4.1.-]	GO:0005975//carbohydrate metabolic process;GO:0010393//galacturonan metabolic process;GO:0016051//carbohydrate biosynthetic process;GO:0043170//macromolecule metabolic process;GO:0008152//metabolic process;GO:0016043//cellular component organization;GO:0071554//cell wall organization or biogenesis;GO:0005976//polysaccharide metabolic process;GO:0045229//external encapsulating structure organizati…
LOC110727192	K04733//interleukin-1 receptor-associated kinase 4 [EC:2.7.11.1];K04733//interleukin-1 receptor-associated kinase 4 [EC:2.7.11.1];K04733//interleukin-1 receptor-associated kinase 4 [EC:2.7.11.1]	GO:0110165//cellular anatomical entity;GO:0016021//integral component of membrane;GO:0031224//intrinsic component of membrane;GO:0016020//membrane;GO:0017076//purine nucleotide binding;GO:0004674//protein serine/threonine kinase activity;GO:0043167//ion binding;GO:1901265//nucleoside phosphate binding;GO:0097159//organic cyclic compound binding;GO:0043168//anion binding;GO:0035639//purine ribonuc…
LOC110720930	K00876//uridine kinase [EC:2.7.1.48]+ko01100//Metabolic pathways+ko00240//Pyrimidine metabolism;K00876//uridine kinase [EC:2.7.1.48]+ko01100//Metabolic pathways+ko00240//Pyrimidine metabolism;K00876//uridine kinase [EC:2.7.1.48]+ko01100//Metabolic pathways+ko00240//Pyrimidine metabolism;K00876//uridine kinase [EC:2.7.1.48]+ko01100//Metabolic pathways+ko00240//Pyrimidine metabolism	GO:0016021//integral component of membrane;GO:0016020//membrane;GO:0031224//intrinsic component of membrane;GO:0110165//cellular anatomical entity;GO:1901265//nucleoside phosphate binding;GO:0032553//ribonucleotide binding;GO:0097159//organic cyclic compound binding;GO:0000166//nucleotide binding;GO:0036094//small molecule binding;GO:0097367//carbohydrate derivative binding;GO:0043167//ion bindin…
LOC110682804	K20478//golgin subfamily B member 1;K20478//golgin subfamily B member 1;K20478//golgin subfamily B member 1;K20478//golgin subfamily B member 1;K20478//golgin subfamily B member 1;K20478//golgin subfamily B member 1	NA
LOC110725245	K00227//Delta7-sterol 5-desaturase [EC:1.14.19.20]+ko01100//Metabolic pathways+ko01110//Biosynthesis of secondary metabolites+ko00100//Steroid biosynthesis	GO:0044238//primary metabolic process;GO:1901576//organic substance biosynthetic process;GO:0008610//lipid biosynthetic process;GO:0006629//lipid metabolic process;GO:0008152//metabolic process;GO:0071704//organic substance metabolic process;GO:0009058//biosynthetic process;GO:0016021//integral component of membrane;GO:0016020//membrane;GO:0110165//cellular anatomical entity;GO:0031224//intrinsic…
LOC110710115	K15718//linoleate 9S-lipoxygenase [EC:1.13.11.58]+ko00591//Linoleic acid metabolism;K08176//MFS transporter, PHS family, inorganic phosphate transporter;K09754//5-O-(4-coumaroyl)-D-quinate 3'-monooxygenase [EC:1.14.14.96]+ko01100//Metabolic pathways+ko01110//Biosynthesis of secondary metabolites+ko00940//Phenylpropanoid biosynthesis+ko00941//Flavonoid biosynthesis+ko00945//Stilbenoid, diarylhepta…	NA
LOC110730245	K22522//cytokinin riboside 5'-monophosphate phosphoribohydrolase [EC:3.2.2.-]	GO:0042445//hormone metabolic process;GO:0071704//organic substance metabolic process;GO:0010817//regulation of hormone levels;GO:0009987//cellular process;GO:0009691//cytokinin biosynthetic process;GO:0006807//nitrogen compound metabolic process;GO:0034754//cellular hormone metabolic process;GO:0042446//hormone biosynthetic process;GO:0009308//amine metabolic process;GO:0008152//metabolic proces…
LOC110714859	K13126//polyadenylate-binding protein+ko03015//mRNA surveillance pathway+ko03018//RNA degradation+ko03013//RNA transport	GO:0043227//membrane-bounded organelle;GO:0043231//intracellular membrane-bounded organelle;GO:0043228//non-membrane-bounded organelle;GO:0005737//cytoplasm;GO:0110165//cellular anatomical entity;GO:0005840//ribosome;GO:0009536//plastid;GO:0009507//chloroplast;GO:0043229//intracellular organelle;GO:0043226//organelle;GO:0043232//intracellular non-membrane-bounded organelle;GO:0005622//intracellul…
LOC110687338	NA	GO:0016070//RNA metabolic process;GO:0009987//cellular process;GO:1901360//organic cyclic compound metabolic process;GO:0043170//macromolecule metabolic process;GO:0044238//primary metabolic process;GO:0006807//nitrogen compound metabolic process;GO:0009451//RNA modification;GO:0008152//metabolic process;GO:0006139//nucleobase-containing compound metabolic process;GO:0044237//cellular metabolic p…
LOC110726993	K22312//hydroxyjasmonate sulfotransferase [EC:2.8.2.39]	NA
LOC110701100	K23048//RING finger protein unkempt;K13832//3-dehydroquinate dehydratase / shikimate dehydrogenase [EC:4.2.1.10 1.1.1.25]+ko01230//Biosynthesis of amino acids+ko01100//Metabolic pathways+ko01110//Biosynthesis of secondary metabolites+ko00400//Phenylalanine, tyrosine and tryptophan biosynthesis	NA
BGI_novel_G001464	K04733//interleukin-1 receptor-associated kinase 4 [EC:2.7.11.1]	GO:0016020//membrane;GO:0031224//intrinsic component of membrane;GO:0016021//integral component of membrane;GO:0110165//cellular anatomical entity;GO:0016772//transferase activity, transferring phosphorus-containing groups;GO:1901265//nucleoside phosphate binding;GO:0032559//adenyl ribonucleotide binding;GO:0030554//adenyl nucleotide binding;GO:0140096//catalytic activity, acting on a protein;GO:…
LOC110691776	NA	GO:0097159//organic cyclic compound binding;GO:0003676//nucleic acid binding;GO:0005488//binding;GO:1901363//heterocyclic compound binding;
LOC110720065	K08597//sentrin-specific protease 8 [EC:3.4.22.68];K08597//sentrin-specific protease 8 [EC:3.4.22.68];K08597//sentrin-specific protease 8 [EC:3.4.22.68];K08597//sentrin-specific protease 8 [EC:3.4.22.68];K08597//sentrin-specific protease 8 [EC:3.4.22.68];K08597//sentrin-specific protease 8 [EC:3.4.22.68]	NA
LOC110700659	K10406//kinesin family member C2/C3	NA
LOC110710861	K21594//translation factor GUF1, mitochondrial [EC:3.6.5.-]	NA
BGI_novel_G001869	K15923//alpha-L-fucosidase 2 [EC:3.2.1.51]+ko00511//Other glycan degradation	GO:0016020//membrane;GO:0031224//intrinsic component of membrane;GO:0110165//cellular anatomical entity;GO:0016021//integral component of membrane;
LOC110692809	K15083//DNA repair protein RAD16	NA
LOC110696171	K11253//histone H3	GO:0043227//membrane-bounded organelle;GO:0005694//chromosome;GO:0000785//chromatin;GO:0005622//intracellular;GO:0032993//protein-DNA complex;GO:0043231//intracellular membrane-bounded organelle;GO:0043226//organelle;GO:0005634//nucleus;GO:0110165//cellular anatomical entity;GO:0032991//protein-containing complex;GO:0043232//intracellular non-membrane-bounded organelle;GO:0000786//nucleosome;GO:0…
LOC110721881	K01056//peptidyl-tRNA hydrolase, PTH1 family [EC:3.1.1.29];K03126//transcription initiation factor TFIID subunit 12+ko03022//Basal transcription factors;K01056//peptidyl-tRNA hydrolase, PTH1 family [EC:3.1.1.29]	GO:0051171//regulation of nitrogen compound metabolic process;GO:0031323//regulation of cellular metabolic process;GO:0065007//biological regulation;GO:0010468//regulation of gene expression;GO:0080090//regulation of primary metabolic process;GO:0006355//regulation of transcription, DNA-templated;GO:0051252//regulation of RNA metabolic process;GO:0019222//regulation of metabolic process;GO:000988…
LOC110731641	K04515//calcium/calmodulin-dependent protein kinase (CaM kinase) II [EC:2.7.11.17];K08818//cell division cycle 2-like [EC:2.7.11.22];K07198//5'-AMP-activated protein kinase, catalytic alpha subunit [EC:2.7.11.11]	GO:0016740//transferase activity;GO:0140096//catalytic activity, acting on a protein;GO:0043167//ion binding;GO:0036094//small molecule binding;GO:0032559//adenyl ribonucleotide binding;GO:1901363//heterocyclic compound binding;GO:0035639//purine ribonucleoside triphosphate binding;GO:0017076//purine nucleotide binding;GO:0043168//anion binding;GO:0005488//binding;GO:0097159//organic cyclic compo…
LOC110735008	K01557//acylpyruvate hydrolase [EC:3.7.1.5]+ko00350//Tyrosine metabolism+ko01100//Metabolic pathways;K01557//acylpyruvate hydrolase [EC:3.7.1.5]+ko00350//Tyrosine metabolism+ko01100//Metabolic pathways	GO:0005739//mitochondrion;GO:0043226//organelle;GO:0110165//cellular anatomical entity;GO:0043227//membrane-bounded organelle;GO:0043231//intracellular membrane-bounded organelle;GO:0043229//intracellular organelle;GO:0005737//cytoplasm;GO:0005622//intracellular;GO:0003824//catalytic activity;GO:0016787//hydrolase activity;GO:0016822//hydrolase activity, acting on acid carbon-carbon bonds;GO:0016…
LOC110726472	NA	GO:0006355//regulation of transcription, DNA-templated;GO:2000112//regulation of cellular macromolecule biosynthetic process;GO:0019219//regulation of nucleobase-containing compound metabolic process;GO:0010468//regulation of gene expression;GO:0031323//regulation of cellular metabolic process;GO:0019222//regulation of metabolic process;GO:0010556//regulation of macromolecule biosynthetic process…
LOC110722270	NA	GO:0009889//regulation of biosynthetic process;GO:1902930//regulation of alcohol biosynthetic process;GO:0050789//regulation of biological process;GO:0019747//regulation of isoprenoid metabolic process;GO:0062012//regulation of small molecule metabolic process;GO:0010115//regulation of abscisic acid biosynthetic process;GO:0031326//regulation of cellular biosynthetic process;GO:0080090//regulatio…
LOC110694292	K21844//protein FAM126;K09338//homeobox-leucine zipper protein;K00103//L-gulonolactone oxidase [EC:1.1.3.8]+ko01100//Metabolic pathways+ko00053//Ascorbate and aldarate metabolism;K11446//histone demethylase JARID1 [EC:1.14.11.-];K00963//UTP--glucose-1-phosphate uridylyltransferase [EC:2.7.7.9]+ko00520//Amino sugar and nucleotide sugar metabolism+ko00040//Pentose and glucuronate interconversions+k…	NA
LOC110724892	K10355//actin, other eukaryote	GO:0005856//cytoskeleton;GO:0043229//intracellular organelle;GO:0005622//intracellular;GO:0110165//cellular anatomical entity;GO:0043228//non-membrane-bounded organelle;GO:0005737//cytoplasm;GO:0043226//organelle;GO:0043232//intracellular non-membrane-bounded organelle;GO:0032559//adenyl ribonucleotide binding;GO:0043167//ion binding;GO:0032555//purine ribonucleotide binding;GO:0043168//anion bin…
BGI_novel_G004049	K02146//V-type H+-transporting ATPase subunit d+ko04145//Phagosome+ko01100//Metabolic pathways+ko00190//Oxidative phosphorylation	GO:0033179//proton-transporting V-type ATPase, V0 domain;GO:0016020//membrane;GO:0098796//membrane protein complex;GO:0016469//proton-transporting two-sector ATPase complex;GO:0032991//protein-containing complex;GO:0033176//proton-transporting V-type ATPase complex;GO:0110165//cellular anatomical entity;GO:0033177//proton-transporting two-sector ATPase complex, proton-transporting domain;GO:00150…
LOC110731095	K11423//histone-lysine N-methyltransferase SETD2 [EC:2.1.1.43]+ko00310//Lysine degradation	NA
LOC110733032	K11666//INO80 complex subunit B;K11666//INO80 complex subunit B	GO:0016043//cellular component organization;GO:0051276//chromosome organization;GO:0006338//chromatin remodeling;GO:0006325//chromatin organization;GO:0009987//cellular process;GO:0071840//cellular component organization or biogenesis;GO:0006996//organelle organization;GO:0043232//intracellular non-membrane-bounded organelle;GO:1902494//catalytic complex;GO:0000790//nuclear chromatin;GO:1904949//…
LOC110727943	K14780//ATP-dependent RNA helicase DHX37/DHR1 [EC:3.6.4.13];K14780//ATP-dependent RNA helicase DHX37/DHR1 [EC:3.6.4.13];K14780//ATP-dependent RNA helicase DHX37/DHR1 [EC:3.6.4.13]	GO:0005524//ATP binding;GO:0016887//ATPase activity;GO:0036094//small molecule binding;GO:0030554//adenyl nucleotide binding;GO:0003676//nucleic acid binding;GO:0032555//purine ribonucleotide binding;GO:1901363//heterocyclic compound binding;GO:0016817//hydrolase activity, acting on acid anhydrides;GO:0003824//catalytic activity;GO:0097159//organic cyclic compound binding;GO:0032559//adenyl ribon…
LOC110719900	K00799//glutathione S-transferase [EC:2.5.1.18]+ko00480//Glutathione metabolism	NA
LOC110726387	K14440//SWI/SNF-related matrix-associated actin-dependent regulator of chromatin subfamily A-like protein 1 [EC:3.6.4.12];K14440//SWI/SNF-related matrix-associated actin-dependent regulator of chromatin subfamily A-like protein 1 [EC:3.6.4.12]	NA
LOC110737929	K00799//glutathione S-transferase [EC:2.5.1.18]+ko00480//Glutathione metabolism	NA
LOC110718582	NA	GO:0016021//integral component of membrane;GO:0031224//intrinsic component of membrane;GO:0110165//cellular anatomical entity;GO:0016020//membrane;
LOC110730666	NA	GO:0051234//establishment of localization;GO:0006810//transport;GO:0071705//nitrogen compound transport;GO:0051179//localization;GO:0031224//intrinsic component of membrane;GO:0016020//membrane;GO:0016021//integral component of membrane;GO:0110165//cellular anatomical entity;GO:0022857//transmembrane transporter activity;GO:0005215//transporter activity;
LOC110712748	K04733//interleukin-1 receptor-associated kinase 4 [EC:2.7.11.1]	NA
LOC110697851	K08867//WNK lysine deficient protein kinase [EC:2.7.11.1];K08867//WNK lysine deficient protein kinase [EC:2.7.11.1]	NA
BGI_novel_G000259	K10400//kinesin family member 15	GO:0005856//cytoskeleton;GO:0005874//microtubule;GO:0110165//cellular anatomical entity;GO:0099513//polymeric cytoskeletal fiber;GO:0099512//supramolecular fiber;GO:0043232//intracellular non-membrane-bounded organelle;GO:0099081//supramolecular polymer;GO:0099080//supramolecular complex;GO:0005622//intracellular;GO:0043226//organelle;GO:0015630//microtubule cytoskeleton;GO:0043228//non-membrane-…
LOC110700325	K04683//transcription factor Dp-1;K09392//transcription factor Dp-2;K04683//transcription factor Dp-1;K09392//transcription factor Dp-2	GO:0051726//regulation of cell cycle;GO:0050794//regulation of cellular process;GO:0050789//regulation of biological process;GO:0065007//biological regulation;GO:0110165//cellular anatomical entity;GO:0043231//intracellular membrane-bounded organelle;GO:0005667//transcription regulator complex;GO:0005622//intracellular;GO:0032991//protein-containing complex;GO:0043227//membrane-bounded organelle;…
LOC110725864	K07904//Ras-related protein Rab-11A+ko04144//Endocytosis;K00134//glyceraldehyde 3-phosphate dehydrogenase [EC:1.2.1.12]+ko00010//Glycolysis / Gluconeogenesis+ko01230//Biosynthesis of amino acids+ko01100//Metabolic pathways+ko01110//Biosynthesis of secondary metabolites+ko00710//Carbon fixation in photosynthetic organisms+ko01200//Carbon metabolism;K15378//solute carrier family 45, member 1/2/4;K1…	NA
LOC110731474	K04733//interleukin-1 receptor-associated kinase 4 [EC:2.7.11.1];K04733//interleukin-1 receptor-associated kinase 4 [EC:2.7.11.1];K04733//interleukin-1 receptor-associated kinase 4 [EC:2.7.11.1];K04733//interleukin-1 receptor-associated kinase 4 [EC:2.7.11.1]	GO:0043168//anion binding;GO:0036094//small molecule binding;GO:0017076//purine nucleotide binding;GO:0016773//phosphotransferase activity, alcohol group as acceptor;GO:0032555//purine ribonucleotide binding;GO:0035639//purine ribonucleoside triphosphate binding;GO:0140096//catalytic activity, acting on a protein;GO:0030554//adenyl nucleotide binding;GO:0016740//transferase activity;GO:0043167//i…
LOC110696055	K02726//20S proteasome subunit alpha 2 [EC:3.4.25.1]+ko03050//Proteasome	GO:0009057//macromolecule catabolic process;GO:1901565//organonitrogen compound catabolic process;GO:0043170//macromolecule metabolic process;GO:0044248//cellular catabolic process;GO:0019538//protein metabolic process;GO:0008152//metabolic process;GO:0009056//catabolic process;GO:0006508//proteolysis;GO:0044267//cellular protein metabolic process;GO:0044265//cellular macromolecule catabolic proc…
LOC110721104	K00344//NADPH2:quinone reductase [EC:1.6.5.5];K00706//1,3-beta-glucan synthase [EC:2.4.1.34]+ko00500//Starch and sucrose metabolism;K00344//NADPH2:quinone reductase [EC:1.6.5.5];K00706//1,3-beta-glucan synthase [EC:2.4.1.34]+ko00500//Starch and sucrose metabolism;K00344//NADPH2:quinone reductase [EC:1.6.5.5];K00706//1,3-beta-glucan synthase [EC:2.4.1.34]+ko00500//Starch and sucrose metabolism;K00…	GO:0009987//cellular process;GO:0065003//protein-containing complex assembly;GO:0034622//cellular protein-containing complex assembly;GO:0008152//metabolic process;GO:0044085//cellular component biogenesis;GO:0071840//cellular component organization or biogenesis;GO:0043933//protein-containing complex subunit organization;GO:0019684//photosynthesis, light reaction;GO:0006091//generation of precur…
LOC110726017	K22696//protein-lysine N-methyltransferase EEF2KMT [EC:2.1.1.-]	NA
LOC110685815	K21952//CASK-interacting protein;K15502//serine/threonine-protein phosphatase 6 regulatory ankyrin repeat subunit A;K21952//CASK-interacting protein;K15502//serine/threonine-protein phosphatase 6 regulatory ankyrin repeat subunit A	GO:0110165//cellular anatomical entity;GO:0031224//intrinsic component of membrane;GO:0016020//membrane;GO:0016021//integral component of membrane;
LOC110732413	K20628//expansin	GO:0110165//cellular anatomical entity;GO:0005576//extracellular region;
LOC110693741	K08695//anthocyanidin reductase [EC:1.3.1.77]+ko01110//Biosynthesis of secondary metabolites+ko00941//Flavonoid biosynthesis	GO:0003824//catalytic activity;
LOC110692688	K10664//E3 ubiquitin-protein ligase ATL6/9/15/31/42/55 [EC:2.3.2.27];K19041//E3 ubiquitin-protein ligase RNF38/44 [EC:2.3.2.27]	GO:0016020//membrane;GO:0016021//integral component of membrane;GO:0110165//cellular anatomical entity;GO:0031224//intrinsic component of membrane;
LOC110712891	K01148//poly(A)-specific ribonuclease [EC:3.1.13.4]+ko03018//RNA degradation	GO:0005488//binding;GO:0003676//nucleic acid binding;GO:0097159//organic cyclic compound binding;GO:1901363//heterocyclic compound binding;GO:0003723//RNA binding;
LOC110683543	K19043//E3 ubiquitin-protein ligase RHF [EC:2.3.2.27];K19043//E3 ubiquitin-protein ligase RHF [EC:2.3.2.27]	NA
LOC110710078	K03657//DNA helicase II / ATP-dependent DNA helicase PcrA [EC:3.6.4.12]+ko03420//Nucleotide excision repair+ko03430//Mismatch repair;K03657//DNA helicase II / ATP-dependent DNA helicase PcrA [EC:3.6.4.12]+ko03420//Nucleotide excision repair+ko03430//Mismatch repair;K03657//DNA helicase II / ATP-dependent DNA helicase PcrA [EC:3.6.4.12]+ko03420//Nucleotide excision repair+ko03430//Mismatch repair;…	GO:0016462//pyrophosphatase activity;GO:0035639//purine ribonucleoside triphosphate binding;GO:0032555//purine ribonucleotide binding;GO:0008094//DNA-dependent ATPase activity;GO:0043167//ion binding;GO:0003676//nucleic acid binding;GO:1901363//heterocyclic compound binding;GO:0036094//small molecule binding;GO:0016818//hydrolase activity, acting on acid anhydrides, in phosphorus-containing anhyd…
BGI_novel_G003656	NA	GO:0060255//regulation of macromolecule metabolic process;GO:0031323//regulation of cellular metabolic process;GO:0065007//biological regulation;GO:0006275//regulation of DNA replication;GO:0050794//regulation of cellular process;GO:0032875//regulation of DNA endoreduplication;GO:0090329//regulation of DNA-dependent DNA replication;GO:2000112//regulation of cellular macromolecule biosynthetic pro…
LOC110690124	K02996//small subunit ribosomal protein S9+ko03010//Ribosome;K02996//small subunit ribosomal protein S9+ko03010//Ribosome	GO:0009987//cellular process;GO:0009058//biosynthetic process;GO:0006412//translation;GO:0043043//peptide biosynthetic process;GO:0044271//cellular nitrogen compound biosynthetic process;GO:0044260//cellular macromolecule metabolic process;GO:0044267//cellular protein metabolic process;GO:1901564//organonitrogen compound metabolic process;GO:0010467//gene expression;GO:0043604//amide biosynthetic…
LOC110736194	K07238//zinc transporter, ZIP family	GO:0031224//intrinsic component of membrane;GO:0110165//cellular anatomical entity;GO:0016020//membrane;GO:0016021//integral component of membrane;GO:0008324//cation transmembrane transporter activity;GO:0015318//inorganic molecular entity transmembrane transporter activity;GO:0022890//inorganic cation transmembrane transporter activity;GO:0005215//transporter activity;GO:0046873//metal ion trans…
LOC110712469	K00799//glutathione S-transferase [EC:2.5.1.18]+ko00480//Glutathione metabolism	NA
LOC110733656	K12947//signal peptidase complex subunit 2 [EC:3.4.-.-]+ko03060//Protein export	GO:0051604//protein maturation;GO:0044237//cellular metabolic process;GO:0019538//protein metabolic process;GO:0006807//nitrogen compound metabolic process;GO:0016485//protein processing;GO:0071704//organic substance metabolic process;GO:0044260//cellular macromolecule metabolic process;GO:0044267//cellular protein metabolic process;GO:0009987//cellular process;GO:0043603//cellular amide metaboli…
LOC110699825	K01303//acylaminoacyl-peptidase [EC:3.4.19.1];K00799//glutathione S-transferase [EC:2.5.1.18]+ko00480//Glutathione metabolism;K08176//MFS transporter, PHS family, inorganic phosphate transporter;K19861//benzyl alcohol O-benzoyltransferase [EC:2.3.1.196 2.3.1.232]	NA
LOC110694915	K01303//acylaminoacyl-peptidase [EC:3.4.19.1];K00799//glutathione S-transferase [EC:2.5.1.18]+ko00480//Glutathione metabolism;K08176//MFS transporter, PHS family, inorganic phosphate transporter;K19861//benzyl alcohol O-benzoyltransferase [EC:2.3.1.196 2.3.1.232]	NA
LOC110694052	K20352//p24 family protein delta-1;K05391//cyclic nucleotide gated channel, plant+ko04626//Plant-pathogen interaction;K04733//interleukin-1 receptor-associated kinase 4 [EC:2.7.11.1]	NA
LOC110735132	K06890//uncharacterized protein	NA
LOC110716687	K00799//glutathione S-transferase [EC:2.5.1.18]+ko00480//Glutathione metabolism;K04733//interleukin-1 receptor-associated kinase 4 [EC:2.7.11.1];K20537//mitogen-activated protein kinase 7/14 [EC:2.7.11.24]+ko04016//MAPK signaling pathway - plant	NA
LOC110725492	K08145//MFS transporter, SP family, solute carrier family 2 (facilitated glucose transporter), member 8	GO:0110165//cellular anatomical entity;GO:0016021//integral component of membrane;GO:0016020//membrane;GO:0031224//intrinsic component of membrane;GO:0005215//transporter activity;GO:0022857//transmembrane transporter activity;
LOC110688362	K03122//transcription initiation factor TFIIA large subunit+ko03022//Basal transcription factors	GO:0009058//biosynthetic process;GO:0046483//heterocycle metabolic process;GO:0006351//transcription, DNA-templated;GO:0009987//cellular process;GO:0034645//cellular macromolecule biosynthetic process;GO:0090304//nucleic acid metabolic process;GO:0019438//aromatic compound biosynthetic process;GO:0006366//transcription by RNA polymerase II;GO:0044238//primary metabolic process;GO:0032774//RNA bio…
LOC110694331	K00963//UTP--glucose-1-phosphate uridylyltransferase [EC:2.7.7.9]+ko00520//Amino sugar and nucleotide sugar metabolism+ko00040//Pentose and glucuronate interconversions+ko01100//Metabolic pathways+ko00052//Galactose metabolism+ko00500//Starch and sucrose metabolism;K02178//checkpoint serine/threonine-protein kinase [EC:2.7.11.1];K13150//coilin;K20102//YTH domain-containing family protein;K07760//…	NA
BGI_novel_G002368	K11323//histone arginine demethylase JMJD6 [EC:1.14.11.-]	NA
LOC110693408	K10581//ubiquitin-conjugating enzyme E2 O [EC:2.3.2.24]+ko04120//Ubiquitin mediated proteolysis	GO:0016020//membrane;GO:0110165//cellular anatomical entity;GO:0031224//intrinsic component of membrane;GO:0016021//integral component of membrane;
LOC110703609	K00472//prolyl 4-hydroxylase [EC:1.14.11.2]+ko00330//Arginine and proline metabolism+ko01100//Metabolic pathways;K00472//prolyl 4-hydroxylase [EC:1.14.11.2]+ko00330//Arginine and proline metabolism+ko01100//Metabolic pathways;K00472//prolyl 4-hydroxylase [EC:1.14.11.2]+ko00330//Arginine and proline metabolism+ko01100//Metabolic pathways	GO:0043229//intracellular organelle;GO:0031984//organelle subcompartment;GO:0005794//Golgi apparatus;GO:0031982//vesicle;GO:0012505//endomembrane system;GO:0005768//endosome;GO:0098791//Golgi apparatus subcompartment;GO:0031410//cytoplasmic vesicle;GO:0043231//intracellular membrane-bounded organelle;GO:0005737//cytoplasm;GO:0005622//intracellular;GO:0043226//organelle;GO:0043227//membrane-bounde…
BGI_novel_G002750	K09667//protein O-GlcNAc transferase [EC:2.4.1.255]+ko00514//Other types of O-glycan biosynthesis;K05391//cyclic nucleotide gated channel, plant+ko04626//Plant-pathogen interaction	GO:1901135//carbohydrate derivative metabolic process;GO:0071704//organic substance metabolic process;GO:0009059//macromolecule biosynthetic process;GO:0009101//glycoprotein biosynthetic process;GO:0006464//cellular protein modification process;GO:1901564//organonitrogen compound metabolic process;GO:1901566//organonitrogen compound biosynthetic process;GO:0044237//cellular metabolic process;GO:0…
LOC110689273	K06172//gamma-secretase subunit APH-1A	GO:0050790//regulation of catalytic activity;GO:0019538//protein metabolic process;GO:0010467//gene expression;GO:0016485//protein processing;GO:0006508//proteolysis;GO:0071704//organic substance metabolic process;GO:1901564//organonitrogen compound metabolic process;GO:0043085//positive regulation of catalytic activity;GO:0008152//metabolic process;GO:0044093//positive regulation of molecular fu…
LOC110715088	K20667//beta-amyrin 28-monooxygenase [EC:1.14.14.126]	NA
LOC110695145	K02701//photosystem I subunit PsaN+ko01100//Metabolic pathways+ko00195//Photosynthesis	GO:0008152//metabolic process;GO:0009987//cellular process;GO:0015979//photosynthesis;GO:0044237//cellular metabolic process;GO:0034357//photosynthetic membrane;GO:0098796//membrane protein complex;GO:0009521//photosystem;GO:0009579//thylakoid;GO:0032991//protein-containing complex;GO:0009522//photosystem I;GO:0016020//membrane;GO:0005622//intracellular;GO:0110165//cellular anatomical entity;
LOC110688063	K12620//U6 snRNA-associated Sm-like protein LSm1+ko03018//RNA degradation	GO:0044270//cellular nitrogen compound catabolic process;GO:0009056//catabolic process;GO:0046483//heterocycle metabolic process;GO:0044238//primary metabolic process;GO:0006807//nitrogen compound metabolic process;GO:0009057//macromolecule catabolic process;GO:0034655//nucleobase-containing compound catabolic process;GO:1901360//organic cyclic compound metabolic process;GO:0009892//negative regu…
LOC110707678	K18980//2-methylene-furan-3-one reductase [EC:1.3.1.105]	GO:0003824//catalytic activity;GO:0046914//transition metal ion binding;GO:0016491//oxidoreductase activity;GO:0008270//zinc ion binding;GO:0043167//ion binding;GO:0043169//cation binding;GO:0005488//binding;GO:0046872//metal ion binding;
LOC110720282	K07088//uncharacterized protein	GO:0051234//establishment of localization;GO:0051179//localization;GO:0009987//cellular process;GO:0055085//transmembrane transport;GO:0006810//transport;GO:0031224//intrinsic component of membrane;GO:0016021//integral component of membrane;GO:0110165//cellular anatomical entity;GO:0016020//membrane;
LOC110685307	K13667//protein glucosyltransferase [EC:2.4.1.-]+ko00514//Other types of O-glycan biosynthesis;K13667//protein glucosyltransferase [EC:2.4.1.-]+ko00514//Other types of O-glycan biosynthesis	NA
LOC110723611	NA	GO:1901363//heterocyclic compound binding;GO:0016891//endoribonuclease activity, producing 5'-phosphomonoesters;GO:0016893//endonuclease activity, active with either ribo- or deoxyribonucleic acids and producing 5'-phosphomonoesters;GO:0003676//nucleic acid binding;GO:0004518//nuclease activity;GO:0004519//endonuclease activity;GO:0004540//ribonuclease activity;GO:0004523//RNA-DNA hybrid ribonucl…
LOC110691726	K15747//beta-ring hydroxylase [EC:1.14.-.-]+ko00906//Carotenoid biosynthesis+ko01100//Metabolic pathways+ko01110//Biosynthesis of secondary metabolites;K17964//leucine-rich PPR motif-containing protein, mitochondrial;K17964//leucine-rich PPR motif-containing protein, mitochondrial;K15747//beta-ring hydroxylase [EC:1.14.-.-]+ko00906//Carotenoid biosynthesis+ko01100//Metabolic pathways+ko01110//Bio…	GO:0043167//ion binding;GO:1901363//heterocyclic compound binding;GO:0005488//binding;GO:0046914//transition metal ion binding;GO:0003824//catalytic activity;GO:0046906//tetrapyrrole binding;GO:0046872//metal ion binding;GO:0043169//cation binding;GO:0005506//iron ion binding;GO:0097159//organic cyclic compound binding;GO:0020037//heme binding;GO:0004497//monooxygenase activity;GO:0016705//oxidor…
LOC110695270	K14326//regulator of nonsense transcripts 1 [EC:3.6.4.-]+ko03015//mRNA surveillance pathway+ko03013//RNA transport;K05658//ATP-binding cassette, subfamily B (MDR/TAP), member 1 [EC:7.6.2.2]+ko02010//ABC transporters;K14007//protein transport protein SEC24+ko04141//Protein processing in endoplasmic reticulum;K01230//mannosyl-oligosaccharide alpha-1,2-mannosidase [EC:3.2.1.113]+ko04141//Protein pro…	NA
LOC110681722	K01762//1-aminocyclopropane-1-carboxylate synthase [EC:4.4.1.14]+ko01100//Metabolic pathways+ko01110//Biosynthesis of secondary metabolites+ko00270//Cysteine and methionine metabolism	GO:0009058//biosynthetic process;GO:0008152//metabolic process;GO:0030170//pyridoxal phosphate binding;GO:0016829//lyase activity;GO:0016846//carbon-sulfur lyase activity;GO:0097159//organic cyclic compound binding;GO:0043167//ion binding;GO:0036094//small molecule binding;GO:0003824//catalytic activity;GO:0016847//1-aminocyclopropane-1-carboxylate synthase activity;GO:0070279//vitamin B6 binding…
LOC110703584	K03094//S-phase kinase-associated protein 1+ko04141//Protein processing in endoplasmic reticulum+ko04120//Ubiquitin mediated proteolysis	NA
LOC110682893	K00167//2-oxoisovalerate dehydrogenase E1 component beta subunit [EC:1.2.4.4]+ko00280//Valine, leucine and isoleucine degradation+ko00640//Propanoate metabolism+ko01100//Metabolic pathways+ko01110//Biosynthesis of secondary metabolites	GO:0003824//catalytic activity;
LOC110713720	K09264//MADS-box transcription factor, plant;K09264//MADS-box transcription factor, plant;K09264//MADS-box transcription factor, plant;K09264//MADS-box transcription factor, plant	NA
LOC110711868	K02183//calmodulin+ko04016//MAPK signaling pathway - plant+ko04626//Plant-pathogen interaction+ko04070//Phosphatidylinositol signaling system;K02183//calmodulin+ko04016//MAPK signaling pathway - plant+ko04626//Plant-pathogen interaction+ko04070//Phosphatidylinositol signaling system	GO:0009987//cellular process;GO:0035556//intracellular signal transduction;GO:0050789//regulation of biological process;GO:0023052//signaling;GO:0019932//second-messenger-mediated signaling;GO:0007154//cell communication;GO:0007165//signal transduction;GO:0065007//biological regulation;GO:0051716//cellular response to stimulus;GO:0050896//response to stimulus;GO:0019722//calcium-mediated signalin…
LOC110701157	NA	GO:0005886//plasma membrane;GO:0071944//cell periphery;GO:0031224//intrinsic component of membrane;GO:0016020//membrane;GO:0110165//cellular anatomical entity;GO:0016021//integral component of membrane;
LOC110707783	K04733//interleukin-1 receptor-associated kinase 4 [EC:2.7.11.1];K04730//interleukin-1 receptor-associated kinase 1 [EC:2.7.11.1]	NA
LOC110702043	K02116//ATP synthase protein I	NA
LOC110710456	K12446//L-arabinokinase [EC:2.7.1.46]+ko00520//Amino sugar and nucleotide sugar metabolism+ko01100//Metabolic pathways	GO:1901265//nucleoside phosphate binding;GO:0005524//ATP binding;GO:0000166//nucleotide binding;GO:1901363//heterocyclic compound binding;GO:0030554//adenyl nucleotide binding;GO:0032559//adenyl ribonucleotide binding;GO:0032553//ribonucleotide binding;GO:0017076//purine nucleotide binding;GO:0043168//anion binding;GO:0005534//galactose binding;GO:0036094//small molecule binding;GO:0097159//organ…
BGI_novel_G001298	K18643//katanin p80 WD40 repeat-containing subunit B1	GO:0000226//microtubule cytoskeleton organization;GO:0051261//protein depolymerization;GO:0006996//organelle organization;GO:0097435//supramolecular fiber organization;GO:0031109//microtubule polymerization or depolymerization;GO:0007017//microtubule-based process;GO:0022411//cellular component disassembly;GO:0043624//cellular protein complex disassembly;GO:0032984//protein-containing complex dis…
LOC110713730	K00963//UTP--glucose-1-phosphate uridylyltransferase [EC:2.7.7.9]+ko00520//Amino sugar and nucleotide sugar metabolism+ko00040//Pentose and glucuronate interconversions+ko01100//Metabolic pathways+ko00052//Galactose metabolism+ko00500//Starch and sucrose metabolism;K07760//cyclin-dependent kinase [EC:2.7.11.22];K02178//checkpoint serine/threonine-protein kinase [EC:2.7.11.1];K01177//beta-amylase …	NA
LOC110733967	K18195//rhamnogalacturonan endolyase [EC:4.2.2.23];K14297//nuclear pore complex protein Nup98-Nup96+ko03013//RNA transport;K02641//ferredoxin--NADP+ reductase [EC:1.18.1.2]+ko01100//Metabolic pathways+ko00195//Photosynthesis;K20178//vacuolar protein sorting-associated protein 8	NA
LOC110738834	K15111//solute carrier family 25 (mitochondrial S-adenosylmethionine transporter), member 26	NA
LOC110689592	K01051//pectinesterase [EC:3.1.1.11]+ko00040//Pentose and glucuronate interconversions+ko01100//Metabolic pathways	NA
LOC110721266	K22804//structural maintenance of chromosomes protein 6;K01188//beta-glucosidase [EC:3.2.1.21]+ko01100//Metabolic pathways+ko00500//Starch and sucrose metabolism+ko01110//Biosynthesis of secondary metabolites+ko00460//Cyanoamino acid metabolism+ko00940//Phenylpropanoid biosynthesis;K01590//histidine decarboxylase [EC:4.1.1.22]+ko01100//Metabolic pathways+ko00340//Histidine metabolism+ko01110//Bio…	GO:0004523//RNA-DNA hybrid ribonuclease activity;GO:0003676//nucleic acid binding;GO:1901363//heterocyclic compound binding;GO:0016891//endoribonuclease activity, producing 5'-phosphomonoesters;GO:0140098//catalytic activity, acting on RNA;GO:0004519//endonuclease activity;GO:0016788//hydrolase activity, acting on ester bonds;GO:0016893//endonuclease activity, active with either ribo- or deoxyrib…
LOC110722263	K15168//mediator of RNA polymerase II transcription subunit 25;K14317//nuclear pore complex protein Nup214+ko03013//RNA transport	GO:0010115//regulation of abscisic acid biosynthetic process;GO:0050896//response to stimulus;GO:0065007//biological regulation;GO:0043455//regulation of secondary metabolic process;GO:1902930//regulation of alcohol biosynthetic process;GO:0062012//regulation of small molecule metabolic process;GO:0019216//regulation of lipid metabolic process;GO:0019747//regulation of isoprenoid metabolic proces…
LOC110688507	K07195//exocyst complex component 7	GO:0033036//macromolecule localization;GO:0045184//establishment of protein localization;GO:0008104//protein localization;GO:0006810//transport;GO:0032940//secretion by cell;GO:0015031//protein transport;GO:0006887//exocytosis;GO:0046903//secretion;GO:0009987//cellular process;GO:0140352//export from cell;GO:0071705//nitrogen compound transport;GO:0051179//localization;GO:0051234//establishment o…
LOC110711817	K15501//serine/threonine-protein phosphatase 6 regulatory subunit 3	GO:0050794//regulation of cellular process;GO:0050790//regulation of catalytic activity;GO:0031399//regulation of protein modification process;GO:0060255//regulation of macromolecule metabolic process;GO:0010921//regulation of phosphatase activity;GO:0080090//regulation of primary metabolic process;GO:0019222//regulation of metabolic process;GO:0051171//regulation of nitrogen compound metabolic p…
LOC110728614	K00703//starch synthase [EC:2.4.1.21]+ko01100//Metabolic pathways+ko00500//Starch and sucrose metabolism+ko01110//Biosynthesis of secondary metabolites	GO:0005982//starch metabolic process;GO:0005975//carbohydrate metabolic process;GO:0044042//glucan metabolic process;GO:0005976//polysaccharide metabolic process;GO:0044238//primary metabolic process;GO:0043170//macromolecule metabolic process;GO:0044237//cellular metabolic process;GO:0044264//cellular polysaccharide metabolic process;GO:0044260//cellular macromolecule metabolic process;GO:004426…
LOC110710442	K17604//zinc finger SWIM domain-containing protein 3	NA
LOC110737367	K22683//aspartyl protease family protein [EC:3.4.23.-]	NA
LOC110686011	K06911//uncharacterized protein;K11843//ubiquitin carboxyl-terminal hydrolase 14 [EC:3.4.19.12]	NA
LOC110721757	K12355//coniferyl-aldehyde dehydrogenase [EC:1.2.1.68]+ko00940//Phenylpropanoid biosynthesis	NA
LOC110698526	K01897//long-chain acyl-CoA synthetase [EC:6.2.1.3]+ko04146//Peroxisome+ko01100//Metabolic pathways+ko00061//Fatty acid biosynthesis+ko01212//Fatty acid metabolism+ko00071//Fatty acid degradation	GO:0003824//catalytic activity;
LOC110736902	K15718//linoleate 9S-lipoxygenase [EC:1.13.11.58]+ko00591//Linoleic acid metabolism	GO:0019752//carboxylic acid metabolic process;GO:0006631//fatty acid metabolic process;GO:0031407//oxylipin metabolic process;GO:0044249//cellular biosynthetic process;GO:0044238//primary metabolic process;GO:0044255//cellular lipid metabolic process;GO:0071704//organic substance metabolic process;GO:0046394//carboxylic acid biosynthetic process;GO:0009987//cellular process;GO:0009058//biosynthet…
LOC110720221	K13128//zinc finger CCHC domain-containing protein 8	NA
LOC110695017	K08176//MFS transporter, PHS family, inorganic phosphate transporter;K19861//benzyl alcohol O-benzoyltransferase [EC:2.3.1.196 2.3.1.232];K09494//T-complex protein 1 subunit beta;K01303//acylaminoacyl-peptidase [EC:3.4.19.1]	NA
LOC110688750	K14209//solute carrier family 36 (proton-coupled amino acid transporter)	GO:0055085//transmembrane transport;GO:0003333//amino acid transmembrane transport;GO:0015711//organic anion transport;GO:0006820//anion transport;GO:0006811//ion transport;GO:0009987//cellular process;GO:0015849//organic acid transport;GO:0051234//establishment of localization;GO:0034220//ion transmembrane transport;GO:0006865//amino acid transport;GO:0006810//transport;GO:0098656//anion transme…
LOC110721382	K20628//expansin	NA
LOC110737393	K14442//ATP-dependent RNA helicase DHX36 [EC:3.6.4.13]+ko03018//RNA degradation	GO:0000166//nucleotide binding;GO:0097367//carbohydrate derivative binding;GO:1901363//heterocyclic compound binding;GO:0005488//binding;GO:0003824//catalytic activity;GO:0032555//purine ribonucleotide binding;GO:0016462//pyrophosphatase activity;GO:0043167//ion binding;GO:0016887//ATPase activity;GO:0032553//ribonucleotide binding;GO:0035639//purine ribonucleoside triphosphate binding;GO:0016818…
LOC110693949	K17086//transmembrane 9 superfamily member 2/4;K17604//zinc finger SWIM domain-containing protein 3	NA
LOC110698255	K18626//trichohyalin;K17046//protein DEK	NA
LOC110732919	K12121//phytochrome B+ko04712//Circadian rhythm - plant;K13098//RNA-binding protein FUS	NA
LOC110703572	K17964//leucine-rich PPR motif-containing protein, mitochondrial	GO:0030198//extracellular matrix organization;GO:0009987//cellular process;GO:0070726//cell wall assembly;GO:0042546//cell wall biogenesis;GO:0071840//cellular component organization or biogenesis;GO:0009664//plant-type cell wall organization;GO:0071554//cell wall organization or biogenesis;GO:0009832//plant-type cell wall biogenesis;GO:0045229//external encapsulating structure organization;GO:00…
LOC110683989	K11975//E3 ubiquitin-protein ligase RNF144 [EC:2.3.2.31]	GO:0043169//cation binding;GO:0140096//catalytic activity, acting on a protein;GO:0005488//binding;GO:0043167//ion binding;GO:0016740//transferase activity;GO:0046872//metal ion binding;GO:0003824//catalytic activity;GO:0019787//ubiquitin-like protein transferase activity;GO:0004842//ubiquitin-protein transferase activity;
LOC110714011	K20092//chromodomain-helicase-DNA-binding protein 1-like [EC:3.6.4.12]	GO:0036094//small molecule binding;GO:1901363//heterocyclic compound binding;GO:0043167//ion binding;GO:0032559//adenyl ribonucleotide binding;GO:1901265//nucleoside phosphate binding;GO:0005524//ATP binding;GO:0030554//adenyl nucleotide binding;GO:0043168//anion binding;GO:0097159//organic cyclic compound binding;GO:0032553//ribonucleotide binding;GO:0005488//binding;GO:0097367//carbohydrate der…
LOC110705672	K09422//transcription factor MYB, plant	GO:0005622//intracellular;GO:0043231//intracellular membrane-bounded organelle;GO:0043229//intracellular organelle;GO:0043226//organelle;GO:0110165//cellular anatomical entity;GO:0005634//nucleus;GO:0043227//membrane-bounded organelle;GO:0097159//organic cyclic compound binding;GO:0003676//nucleic acid binding;GO:1901363//heterocyclic compound binding;GO:0005488//binding;GO:0003677//DNA binding;
LOC110726378	K22069//LYR motif-containing protein 4	NA
LOC110710783	K01807//ribose 5-phosphate isomerase A [EC:5.3.1.6]+ko00030//Pentose phosphate pathway+ko01230//Biosynthesis of amino acids+ko01100//Metabolic pathways+ko01110//Biosynthesis of secondary metabolites+ko00710//Carbon fixation in photosynthetic organisms+ko01200//Carbon metabolism;K07478//putative ATPase;K01807//ribose 5-phosphate isomerase A [EC:5.3.1.6]+ko00030//Pentose phosphate pathway+ko01230//…	NA
LOC110701868	K17604//zinc finger SWIM domain-containing protein 3	NA
LOC110685198	K10581//ubiquitin-conjugating enzyme E2 O [EC:2.3.2.24]+ko04120//Ubiquitin mediated proteolysis;K10581//ubiquitin-conjugating enzyme E2 O [EC:2.3.2.24]+ko04120//Ubiquitin mediated proteolysis	NA
LOC110733616	K22390//acid phosphatase type 7;K22390//acid phosphatase type 7	GO:0016787//hydrolase activity;GO:0016791//phosphatase activity;GO:0003824//catalytic activity;GO:0003993//acid phosphatase activity;GO:0016788//hydrolase activity, acting on ester bonds;GO:0046872//metal ion binding;GO:0005488//binding;GO:0042578//phosphoric ester hydrolase activity;GO:0043167//ion binding;GO:0043169//cation binding;
LOC110726862	K12598//ATP-dependent RNA helicase DOB1 [EC:3.6.4.13]+ko03018//RNA degradation;K12857//Prp8 binding protein+ko03040//Spliceosome	GO:0032501//multicellular organismal process;GO:0007275//multicellular organism development;GO:0048856//anatomical structure development;GO:0032502//developmental process;GO:0043231//intracellular membrane-bounded organelle;GO:0110165//cellular anatomical entity;GO:0005622//intracellular;GO:0043227//membrane-bounded organelle;GO:0043226//organelle;GO:0005634//nucleus;GO:0043229//intracellular org…
LOC110721472	K04733//interleukin-1 receptor-associated kinase 4 [EC:2.7.11.1]	GO:0110165//cellular anatomical entity;GO:0016020//membrane;GO:0016021//integral component of membrane;GO:0031224//intrinsic component of membrane;
BGI_novel_G004584	K23108//benzoate---CoA ligase [EC:6.2.1.25];K01913//acetate---CoA ligase [EC:6.2.1.1]+ko00010//Glycolysis / Gluconeogenesis+ko01100//Metabolic pathways+ko01110//Biosynthesis of secondary metabolites+ko00620//Pyruvate metabolism+ko01200//Carbon metabolism+ko00630//Glyoxylate and dicarboxylate metabolism	GO:0016020//membrane;GO:0031224//intrinsic component of membrane;GO:0110165//cellular anatomical entity;GO:0016021//integral component of membrane;GO:0015297//antiporter activity;GO:0015291//secondary active transmembrane transporter activity;GO:0022804//active transmembrane transporter activity;GO:0022857//transmembrane transporter activity;GO:0042910//xenobiotic transmembrane transporter activi…
LOC110729129	K11434//type I protein arginine methyltransferase [EC:2.1.1.319]	GO:0003824//catalytic activity;GO:0008170//N-methyltransferase activity;GO:0008276//protein methyltransferase activity;GO:0016274//protein-arginine N-methyltransferase activity;GO:0008757//S-adenosylmethionine-dependent methyltransferase activity;GO:0008168//methyltransferase activity;GO:0016740//transferase activity;GO:0016741//transferase activity, transferring one-carbon groups;GO:0016273//arg…
LOC110687394	K08245//phytepsin [EC:3.4.23.40]	GO:0006629//lipid metabolic process;GO:0071704//organic substance metabolic process;GO:0044238//primary metabolic process;GO:0008152//metabolic process;GO:0070011//peptidase activity, acting on L-amino acid peptides;GO:0016787//hydrolase activity;GO:0008233//peptidase activity;GO:0004190//aspartic-type endopeptidase activity;GO:0003824//catalytic activity;GO:0070001//aspartic-type peptidase activ…
LOC110687879	K09667//protein O-GlcNAc transferase [EC:2.4.1.255]+ko00514//Other types of O-glycan biosynthesis	NA
LOC110724618	K13600//chlorophyllide a oxygenase [EC:1.14.13.122]+ko00860//Porphyrin and chlorophyll metabolism+ko01100//Metabolic pathways+ko01110//Biosynthesis of secondary metabolites	GO:0043167//ion binding;GO:0051536//iron-sulfur cluster binding;GO:0016703//oxidoreductase activity, acting on single donors with incorporation of molecular oxygen, incorporation of one atom of oxygen (internal monooxygenases or internal mixed function oxidases);GO:0051540//metal cluster binding;GO:0043169//cation binding;GO:0003824//catalytic activity;GO:0016701//oxidoreductase activity, acting …
BGI_novel_G003057	K03327//multidrug resistance protein, MATE family	GO:0110165//cellular anatomical entity;GO:0016021//integral component of membrane;GO:0031224//intrinsic component of membrane;GO:0016020//membrane;GO:0022857//transmembrane transporter activity;GO:0005215//transporter activity;GO:0022804//active transmembrane transporter activity;GO:0042910//xenobiotic transmembrane transporter activity;GO:0015291//secondary active transmembrane transporter activ…
LOC110686156	K18470//Rho GTPase-activating protein 1	NA
LOC110684608	K13680//beta-mannan synthase [EC:2.4.1.32]	GO:1901700//response to oxygen-containing compound;GO:0009269//response to desiccation;GO:0009628//response to abiotic stimulus;GO:0009414//response to water deprivation;GO:0042221//response to chemical;GO:0001101//response to acid chemical;GO:0006950//response to stress;GO:0010035//response to inorganic substance;GO:0009415//response to water;GO:0050896//response to stimulus;
LOC110690170	K15255//ATP-dependent DNA helicase PIF1 [EC:3.6.4.12]	NA
LOC110717645	K08333//phosphoinositide-3-kinase, regulatory subunit 4 [EC:2.7.11.1]+ko04136//Autophagy - other	NA
LOC110729709	K02927//large subunit ribosomal protein L40e+ko03010//Ribosome	GO:0009987//cellular process;GO:1901576//organic substance biosynthetic process;GO:0006464//cellular protein modification process;GO:0019538//protein metabolic process;GO:0009058//biosynthetic process;GO:0043603//cellular amide metabolic process;GO:0008152//metabolic process;GO:0036211//protein modification process;GO:0044249//cellular biosynthetic process;GO:0070647//protein modification by smal…
LOC110696233	K00924//kinase [EC:2.7.1.-];K00924//kinase [EC:2.7.1.-]	GO:0031224//intrinsic component of membrane;GO:0110165//cellular anatomical entity;GO:0016020//membrane;GO:0016021//integral component of membrane;GO:0140096//catalytic activity, acting on a protein;GO:0016772//transferase activity, transferring phosphorus-containing groups;GO:0004672//protein kinase activity;GO:0003824//catalytic activity;GO:0005488//binding;GO:1901363//heterocyclic compound bin…
LOC110708812	NA	GO:0006950//response to stress;GO:0006725//cellular aromatic compound metabolic process;GO:0034641//cellular nitrogen compound metabolic process;GO:0006139//nucleobase-containing compound metabolic process;GO:0006974//cellular response to DNA damage stimulus;GO:0006281//DNA repair;GO:0006807//nitrogen compound metabolic process;GO:0044260//cellular macromolecule metabolic process;GO:0044237//cell…
BGI_novel_G001963	K14568//rRNA small subunit pseudouridine methyltransferase Nep1 [EC:2.1.1.260]+ko03008//Ribosome biogenesis in eukaryotes;K14321//nucleoporin-like protein 2+ko03013//RNA transport;K04125//gibberellin 2beta-dioxygenase [EC:1.14.11.13]+ko00904//Diterpenoid biosynthesis+ko01110//Biosynthesis of secondary metabolites;K05665//ATP-binding cassette, subfamily C (CFTR/MRP), member 1 [EC:7.6.2.3]+ko02010/…	GO:0044237//cellular metabolic process;GO:0044260//cellular macromolecule metabolic process;GO:0006139//nucleobase-containing compound metabolic process;GO:0034641//cellular nitrogen compound metabolic process;GO:0009987//cellular process;GO:0008152//metabolic process;GO:0071704//organic substance metabolic process;GO:0046483//heterocycle metabolic process;GO:0015074//DNA integration;GO:0044238//…
LOC110691595	K08597//sentrin-specific protease 8 [EC:3.4.22.68];K08597//sentrin-specific protease 8 [EC:3.4.22.68];K08597//sentrin-specific protease 8 [EC:3.4.22.68];K08597//sentrin-specific protease 8 [EC:3.4.22.68];K08597//sentrin-specific protease 8 [EC:3.4.22.68];K08597//sentrin-specific protease 8 [EC:3.4.22.68];K08597//sentrin-specific protease 8 [EC:3.4.22.68];K08597//sentrin-specific protease 8 [EC:3.…	NA
LOC110682536	K09060//plant G-box-binding factor	GO:0140110//transcription regulator activity;GO:0003700//DNA-binding transcription factor activity;
LOC110682989	K15176//RNA polymerase-associated protein CTR9	GO:0065007//biological regulation;GO:0050789//regulation of biological process;GO:0008152//metabolic process;GO:0006325//chromatin organization;GO:0051569//regulation of histone H3-K4 methylation;GO:1903506//regulation of nucleic acid-templated transcription;GO:0044260//cellular macromolecule metabolic process;GO:0032268//regulation of cellular protein metabolic process;GO:0044237//cellular metab…
LOC110687447	K15030//translation initiation factor 3 subunit M;K15030//translation initiation factor 3 subunit M	NA
LOC110739724	K07178//RIO kinase 1 [EC:2.7.11.1]+ko03008//Ribosome biogenesis in eukaryotes;K07178//RIO kinase 1 [EC:2.7.11.1]+ko03008//Ribosome biogenesis in eukaryotes	NA
LOC110686658	K03188//urease accessory protein;K04733//interleukin-1 receptor-associated kinase 4 [EC:2.7.11.1];K04733//interleukin-1 receptor-associated kinase 4 [EC:2.7.11.1];K03188//urease accessory protein;K03188//urease accessory protein;K04733//interleukin-1 receptor-associated kinase 4 [EC:2.7.11.1]	NA
BGI_novel_G000786	K12815//pre-mRNA-splicing factor ATP-dependent RNA helicase DHX38/PRP16 [EC:3.6.4.13]+ko03040//Spliceosome	NA
LOC110718875	K09250//cellular nucleic acid-binding protein;K09250//cellular nucleic acid-binding protein	GO:0043169//cation binding;GO:0046914//transition metal ion binding;GO:0005488//binding;GO:0003677//DNA binding;GO:0046872//metal ion binding;GO:0043167//ion binding;GO:0003676//nucleic acid binding;GO:0097159//organic cyclic compound binding;GO:1901363//heterocyclic compound binding;GO:0008270//zinc ion binding;
BGI_novel_G000778	NA	GO:0031224//intrinsic component of membrane;GO:0110165//cellular anatomical entity;GO:0016020//membrane;GO:0016021//integral component of membrane;
LOC110703059	K17964//leucine-rich PPR motif-containing protein, mitochondrial	NA
LOC110723859	NA	GO:0006810//transport;GO:0033036//macromolecule localization;GO:0034613//cellular protein localization;GO:0009987//cellular process;GO:0006886//intracellular protein transport;GO:0071705//nitrogen compound transport;GO:0070727//cellular macromolecule localization;GO:0042886//amide transport;GO:0046907//intracellular transport;GO:0051641//cellular localization;GO:0008104//protein localization;GO:0…
LOC110696097	K19041//E3 ubiquitin-protein ligase RNF38/44 [EC:2.3.2.27]	NA
LOC110698954	K12741//heterogeneous nuclear ribonucleoprotein A1/A3+ko03040//Spliceosome;K14514//ethylene-insensitive protein 3+ko04016//MAPK signaling pathway - plant+ko04075//Plant hormone signal transduction	NA
BGI_novel_G000144	K20363//protein YIPF5/7	NA
LOC110714827	NA	GO:0009605//response to external stimulus;GO:0009416//response to light stimulus;GO:0009606//tropism;GO:0009628//response to abiotic stimulus;GO:0009638//phototropism;GO:0050896//response to stimulus;GO:0009314//response to radiation;GO:0009637//response to blue light;
LOC110716982	K15363//fanconi-associated nuclease 1 [EC:3.1.21.- 3.1.4.1];K01807//ribose 5-phosphate isomerase A [EC:5.3.1.6]+ko00030//Pentose phosphate pathway+ko01230//Biosynthesis of amino acids+ko01100//Metabolic pathways+ko01110//Biosynthesis of secondary metabolites+ko00710//Carbon fixation in photosynthetic organisms+ko01200//Carbon metabolism	GO:0055085//transmembrane transport;GO:0051179//localization;GO:0051234//establishment of localization;GO:0006810//transport;GO:0009987//cellular process;GO:0110165//cellular anatomical entity;GO:0016020//membrane;GO:0016021//integral component of membrane;GO:0031224//intrinsic component of membrane;
LOC110682206	K21596//calmodulin-binding transcription activator	NA
LOC110732385	K09286//EREBP-like factor	GO:0043227//membrane-bounded organelle;GO:0043229//intracellular organelle;GO:0005622//intracellular;GO:0110165//cellular anatomical entity;GO:0043231//intracellular membrane-bounded organelle;GO:0043226//organelle;GO:0005634//nucleus;GO:0003700//DNA-binding transcription factor activity;GO:1901363//heterocyclic compound binding;GO:0003677//DNA binding;GO:0005488//binding;GO:0097159//organic cycl…
LOC110687431	K06130//lysophospholipase II [EC:3.1.1.5]+ko00564//Glycerophospholipid metabolism	GO:0031224//intrinsic component of membrane;GO:0016021//integral component of membrane;GO:0016020//membrane;GO:0110165//cellular anatomical entity;GO:0003824//catalytic activity;GO:0016787//hydrolase activity;
LOC110695122	K10614//E3 ubiquitin-protein ligase HERC3 [EC:2.3.2.26]+ko04120//Ubiquitin mediated proteolysis;K10615//E3 ubiquitin-protein ligase HERC4 [EC:2.3.2.26]+ko04120//Ubiquitin mediated proteolysis;K10615//E3 ubiquitin-protein ligase HERC4 [EC:2.3.2.26]+ko04120//Ubiquitin mediated proteolysis;K10614//E3 ubiquitin-protein ligase HERC3 [EC:2.3.2.26]+ko04120//Ubiquitin mediated proteolysis	NA
LOC110722825	K00232//acyl-CoA oxidase [EC:1.3.3.6]+ko04146//Peroxisome+ko00592//alpha-Linolenic acid metabolism+ko01100//Metabolic pathways+ko01110//Biosynthesis of secondary metabolites+ko01212//Fatty acid metabolism+ko01040//Biosynthesis of unsaturated fatty acids+ko00071//Fatty acid degradation	GO:0046395//carboxylic acid catabolic process;GO:0055114//oxidation-reduction process;GO:0032787//monocarboxylic acid metabolic process;GO:0008152//metabolic process;GO:0019395//fatty acid oxidation;GO:0034440//lipid oxidation;GO:0016042//lipid catabolic process;GO:0006629//lipid metabolic process;GO:0044255//cellular lipid metabolic process;GO:0044238//primary metabolic process;GO:0044237//cellu…
BGI_novel_G001691	K08269//serine/threonine-protein kinase ULK2 [EC:2.7.11.1]+ko04136//Autophagy - other	GO:0004672//protein kinase activity;GO:0032553//ribonucleotide binding;GO:0032559//adenyl ribonucleotide binding;GO:0097159//organic cyclic compound binding;GO:0043167//ion binding;GO:0005488//binding;GO:0016773//phosphotransferase activity, alcohol group as acceptor;GO:1901363//heterocyclic compound binding;GO:0035639//purine ribonucleoside triphosphate binding;GO:0016740//transferase activity;G…
LOC110684876	K15255//ATP-dependent DNA helicase PIF1 [EC:3.6.4.12]	NA
LOC110731552	NA	GO:0009987//cellular process;GO:0006457//protein folding;
LOC110733283	K05909//laccase [EC:1.10.3.2];K01188//beta-glucosidase [EC:3.2.1.21]+ko01100//Metabolic pathways+ko00500//Starch and sucrose metabolism+ko01110//Biosynthesis of secondary metabolites+ko00460//Cyanoamino acid metabolism+ko00940//Phenylpropanoid biosynthesis;K22804//structural maintenance of chromosomes protein 6;K12120//phytochrome A+ko04712//Circadian rhythm - plant;K01213//galacturan 1,4-alpha-g…	NA
LOC110683775	K06173//tRNA pseudouridine38-40 synthase [EC:5.4.99.12]	GO:0006807//nitrogen compound metabolic process;GO:0006396//RNA processing;GO:0010467//gene expression;GO:0044238//primary metabolic process;GO:0034641//cellular nitrogen compound metabolic process;GO:0034470//ncRNA processing;GO:0046483//heterocycle metabolic process;GO:0006725//cellular aromatic compound metabolic process;GO:0008152//metabolic process;GO:0009987//cellular process;GO:0071704//or…
LOC110697541	K08867//WNK lysine deficient protein kinase [EC:2.7.11.1]	NA
LOC110685535	K08150//MFS transporter, SP family, solute carrier family 2 (myo-inositol transporter), member 13	GO:0031224//intrinsic component of membrane;GO:0110165//cellular anatomical entity;GO:0016020//membrane;GO:0016021//integral component of membrane;GO:0005215//transporter activity;GO:0022857//transmembrane transporter activity;
LOC110697055	K22133//oxalate---CoA ligase [EC:6.2.1.8]+ko01100//Metabolic pathways+ko00630//Glyoxylate and dicarboxylate metabolism	GO:0003824//catalytic activity;
LOC110682031	K19040//E3 ubiquitin-protein ligase ATL10/75/76/77/78 [EC:2.3.2.27]	NA
LOC110710726	K07390//monothiol glutaredoxin	GO:0050789//regulation of biological process;GO:0050794//regulation of cellular process;GO:0065008//regulation of biological quality;GO:0042592//homeostatic process;GO:0019725//cellular homeostasis;GO:0065007//biological regulation;GO:0009987//cellular process;GO:0045454//cell redox homeostasis;GO:0016491//oxidoreductase activity;GO:0015036//disulfide oxidoreductase activity;GO:0003824//catalytic…
BGI_novel_G000838	K09140//pre-rRNA-processing protein TSR3	GO:0034641//cellular nitrogen compound metabolic process;GO:1901360//organic cyclic compound metabolic process;GO:0044238//primary metabolic process;GO:0008152//metabolic process;GO:0016072//rRNA metabolic process;GO:0042254//ribosome biogenesis;GO:0010467//gene expression;GO:0022613//ribonucleoprotein complex biogenesis;GO:0044237//cellular metabolic process;GO:0071840//cellular component organi…
LOC110691747	K14794//ribosomal RNA-processing protein 12	GO:0110165//cellular anatomical entity;GO:0016020//membrane;GO:0031224//intrinsic component of membrane;GO:0016021//integral component of membrane;
LOC110700694	K15115//solute carrier family 25 (mitochondrial folate transporter), member 32;K15113//solute carrier family 25 (mitochondrial iron transporter), member 28/37;K15111//solute carrier family 25 (mitochondrial S-adenosylmethionine transporter), member 26;K15115//solute carrier family 25 (mitochondrial folate transporter), member 32;K15113//solute carrier family 25 (mitochondrial iron transporter), m…	GO:0016021//integral component of membrane;GO:0110165//cellular anatomical entity;GO:0031224//intrinsic component of membrane;GO:0016020//membrane;
LOC110719949	K18730//PERQ amino acid-rich with GYF domain-containing protein;K18730//PERQ amino acid-rich with GYF domain-containing protein;K18730//PERQ amino acid-rich with GYF domain-containing protein;K18730//PERQ amino acid-rich with GYF domain-containing protein;K18730//PERQ amino acid-rich with GYF domain-containing protein;K18730//PERQ amino acid-rich with GYF domain-containing protein;K18730//PERQ am…	NA
LOC110722025	K18054//2'-deoxymugineic-acid 2'-dioxygenase / mugineic-acid 3-dioxygenase [EC:1.14.11.24 1.14.11.25]	NA
LOC110703457	K11844//ubiquitin carboxyl-terminal hydrolase 16/45 [EC:3.4.19.12];K14011//UBX domain-containing protein 6+ko04141//Protein processing in endoplasmic reticulum;K11844//ubiquitin carboxyl-terminal hydrolase 16/45 [EC:3.4.19.12];K14011//UBX domain-containing protein 6+ko04141//Protein processing in endoplasmic reticulum;K11844//ubiquitin carboxyl-terminal hydrolase 16/45 [EC:3.4.19.12];K14011//UBX …	NA
LOC110704523	K21867//potassium channel	GO:0051049//regulation of transport;GO:0050794//regulation of cellular process;GO:0034765//regulation of ion transmembrane transport;GO:0043269//regulation of ion transport;GO:0034762//regulation of transmembrane transport;GO:0032879//regulation of localization;GO:0050789//regulation of biological process;GO:0065007//biological regulation;GO:0110165//cellular anatomical entity;GO:0016020//membran…
LOC110683379	K04628//ceramide galactosyltransferase [EC:2.4.1.47]+ko00600//Sphingolipid metabolism+ko01100//Metabolic pathways+ko00565//Ether lipid metabolism;K00699//glucuronosyltransferase [EC:2.4.1.17]+ko00860//Porphyrin and chlorophyll metabolism+ko00040//Pentose and glucuronate interconversions+ko01100//Metabolic pathways+ko00053//Ascorbate and aldarate metabolism+ko01110//Biosynthesis of secondary metab…	GO:0016740//transferase activity;GO:0003824//catalytic activity;GO:0016758//transferase activity, transferring hexosyl groups;GO:0016757//transferase activity, transferring glycosyl groups;
LOC110684682	K18270//Rab3 GTPase-activating protein catalytic subunit;K18270//Rab3 GTPase-activating protein catalytic subunit;K18270//Rab3 GTPase-activating protein catalytic subunit;K18270//Rab3 GTPase-activating protein catalytic subunit;K18270//Rab3 GTPase-activating protein catalytic subunit	NA
LOC110713219	K11808//phosphoribosylaminoimidazole carboxylase [EC:4.1.1.21]+ko00230//Purine metabolism+ko01100//Metabolic pathways+ko01110//Biosynthesis of secondary metabolites;K11808//phosphoribosylaminoimidazole carboxylase [EC:4.1.1.21]+ko00230//Purine metabolism+ko01100//Metabolic pathways+ko01110//Biosynthesis of secondary metabolites;K11808//phosphoribosylaminoimidazole carboxylase [EC:4.1.1.21]+ko0023…	NA
LOC110704649	K20352//p24 family protein delta-1;K04733//interleukin-1 receptor-associated kinase 4 [EC:2.7.11.1];K13457//disease resistance protein RPM1+ko04626//Plant-pathogen interaction;K05391//cyclic nucleotide gated channel, plant+ko04626//Plant-pathogen interaction	GO:0046872//metal ion binding;GO:0043167//ion binding;GO:0046914//transition metal ion binding;GO:0043169//cation binding;GO:0003676//nucleic acid binding;GO:0097159//organic cyclic compound binding;GO:1901363//heterocyclic compound binding;GO:0005488//binding;GO:0008270//zinc ion binding;
LOC110720711	K04733//interleukin-1 receptor-associated kinase 4 [EC:2.7.11.1]	NA
LOC110698729	K14484//auxin-responsive protein IAA+ko04075//Plant hormone signal transduction	GO:0007154//cell communication;GO:0006355//regulation of transcription, DNA-templated;GO:2001141//regulation of RNA biosynthetic process;GO:0010556//regulation of macromolecule biosynthetic process;GO:0051716//cellular response to stimulus;GO:0009987//cellular process;GO:0051252//regulation of RNA metabolic process;GO:0010033//response to organic substance;GO:0050896//response to stimulus;GO:0009…
LOC110716738	K22414//polymerase delta-interacting protein 3;K22414//polymerase delta-interacting protein 3;K22414//polymerase delta-interacting protein 3	GO:1901363//heterocyclic compound binding;GO:0005488//binding;GO:0003676//nucleic acid binding;GO:0003723//RNA binding;GO:0003682//chromatin binding;GO:0097159//organic cyclic compound binding;
LOC110685331	K00288//methylenetetrahydrofolate dehydrogenase (NADP+) / methenyltetrahydrofolate cyclohydrolase / formyltetrahydrofolate synthetase [EC:1.5.1.5 3.5.4.9 6.3.4.3]+ko00670//One carbon pool by folate+ko01100//Metabolic pathways	NA
BGI_novel_G004050	K09022//2-iminobutanoate/2-iminopropanoate deaminase [EC:3.5.99.10]	NA
LOC110691186	K17604//zinc finger SWIM domain-containing protein 3;K17086//transmembrane 9 superfamily member 2/4	NA
LOC110699138	NA	GO:0051234//establishment of localization;GO:0072666//establishment of protein localization to vacuole;GO:0030004//cellular monovalent inorganic cation homeostasis;GO:0009987//cellular process;GO:0071702//organic substance transport;GO:0042886//amide transport;GO:0055065//metal ion homeostasis;GO:0098771//inorganic ion homeostasis;GO:0065007//biological regulation;GO:0051179//localization;GO:0015…
LOC110732207	K00512//steroid 17alpha-monooxygenase / 17alpha-hydroxyprogesterone deacetylase [EC:1.14.14.19 1.14.14.32]+ko01100//Metabolic pathways;K14985//26-hydroxylase [EC:1.14.-.-];K14985//26-hydroxylase [EC:1.14.-.-];K00512//steroid 17alpha-monooxygenase / 17alpha-hydroxyprogesterone deacetylase [EC:1.14.14.19 1.14.14.32]+ko01100//Metabolic pathways	NA
BGI_novel_G002259	K02325//DNA polymerase epsilon subunit 2 [EC:2.7.7.7]+ko03420//Nucleotide excision repair+ko03030//DNA replication+ko03410//Base excision repair	NA
LOC110738695	K03145//transcription elongation factor S-II;K03145//transcription elongation factor S-II;K03145//transcription elongation factor S-II	GO:0008152//metabolic process;GO:2000112//regulation of cellular macromolecule biosynthetic process;GO:0044260//cellular macromolecule metabolic process;GO:0050789//regulation of biological process;GO:0044238//primary metabolic process;GO:0046483//heterocycle metabolic process;GO:0060255//regulation of macromolecule metabolic process;GO:1903506//regulation of nucleic acid-templated transcription;…
LOC110715298	K01803//triosephosphate isomerase (TIM) [EC:5.3.1.1]+ko00010//Glycolysis / Gluconeogenesis+ko01230//Biosynthesis of amino acids+ko01100//Metabolic pathways+ko00051//Fructose and mannose metabolism+ko01110//Biosynthesis of secondary metabolites+ko00710//Carbon fixation in photosynthetic organisms+ko01200//Carbon metabolism+ko00562//Inositol phosphate metabolism	GO:0006796//phosphate-containing compound metabolic process;GO:1901135//carbohydrate derivative metabolic process;GO:0019637//organophosphate metabolic process;GO:0006793//phosphorus metabolic process;GO:0009185//ribonucleoside diphosphate metabolic process;GO:0006090//pyruvate metabolic process;GO:0046034//ATP metabolic process;GO:0009259//ribonucleotide metabolic process;GO:0009056//catabolic p…
LOC110704332	K15322//tRNA-splicing endonuclease subunit Sen2 [EC:4.6.1.16];K15322//tRNA-splicing endonuclease subunit Sen2 [EC:4.6.1.16]	NA
BGI_novel_G003895	K07192//flotillin	GO:0005488//binding;GO:1901363//heterocyclic compound binding;GO:0003676//nucleic acid binding;GO:0003723//RNA binding;GO:0097159//organic cyclic compound binding;
LOC110714359	K03217//YidC/Oxa1 family membrane protein insertase+ko03060//Protein export	NA
LOC110725866	K22647//ubiquitin carboxyl-terminal hydrolase MINDY-3/4 [EC:3.4.19.12]	NA
LOC110722567	NA	GO:0008233//peptidase activity;GO:0140096//catalytic activity, acting on a protein;GO:0003824//catalytic activity;GO:0016787//hydrolase activity;
BGI_novel_G003156	NA	GO:0016020//membrane;GO:0110165//cellular anatomical entity;GO:0016021//integral component of membrane;GO:0031224//intrinsic component of membrane;
LOC110706173	K06133//4'-phosphopantetheinyl transferase [EC:2.7.8.-]+ko00770//Pantothenate and CoA biosynthesis;K06133//4'-phosphopantetheinyl transferase [EC:2.7.8.-]+ko00770//Pantothenate and CoA biosynthesis;K06133//4'-phosphopantetheinyl transferase [EC:2.7.8.-]+ko00770//Pantothenate and CoA biosynthesis	GO:0016780//phosphotransferase activity, for other substituted phosphate groups;GO:0005488//binding;GO:0016740//transferase activity;GO:0003824//catalytic activity;GO:0043167//ion binding;GO:0046872//metal ion binding;GO:0016772//transferase activity, transferring phosphorus-containing groups;GO:0008897//holo-[acyl-carrier-protein] synthase activity;GO:0043169//cation binding;GO:0000287//magnesiu…
LOC110692480	K00784//ribonuclease Z [EC:3.1.26.11]+ko03013//RNA transport;K01728//pectate lyase [EC:4.2.2.2]+ko00040//Pentose and glucuronate interconversions	NA
LOC110722618	K20721//reticulon-1	GO:0031090//organelle membrane;GO:0043226//organelle;GO:0005789//endoplasmic reticulum membrane;GO:0016021//integral component of membrane;GO:0042175//nuclear outer membrane-endoplasmic reticulum membrane network;GO:0012505//endomembrane system;GO:0031224//intrinsic component of membrane;GO:0043227//membrane-bounded organelle;GO:0110165//cellular anatomical entity;GO:0016020//membrane;
LOC110712353	K08287//dual-specificity kinase [EC:2.7.12.1];K08287//dual-specificity kinase [EC:2.7.12.1]	NA
LOC110725336	K18758//DIS3-like exonuclease 2 [EC:3.1.13.-]	GO:1901361//organic cyclic compound catabolic process;GO:0010605//negative regulation of macromolecule metabolic process;GO:0034641//cellular nitrogen compound metabolic process;GO:0009987//cellular process;GO:0046483//heterocycle metabolic process;GO:0009892//negative regulation of metabolic process;GO:1990074//polyuridylation-dependent mRNA catabolic process;GO:0043632//modification-dependent m…
LOC110717245	K02218//casein kinase 1 [EC:2.7.11.1];K07904//Ras-related protein Rab-11A+ko04144//Endocytosis;K00430//peroxidase [EC:1.11.1.7]+ko01100//Metabolic pathways+ko01110//Biosynthesis of secondary metabolites+ko00940//Phenylpropanoid biosynthesis	NA
LOC110733959	K14559//U3 small nucleolar RNA-associated protein MPP10+ko03008//Ribosome biogenesis in eukaryotes	NA
LOC110725994	K13484//5-hydroxyisourate hydrolase / 2-oxo-4-hydroxy-4-carboxy-5-ureidoimidazoline decarboxylase [EC:3.5.2.17 4.1.1.97]+ko00230//Purine metabolism+ko01100//Metabolic pathways	NA
LOC110729581	K16302//metal transporter CNNM;K16302//metal transporter CNNM;K16302//metal transporter CNNM;K16302//metal transporter CNNM;K16302//metal transporter CNNM;K16302//metal transporter CNNM;K16302//metal transporter CNNM;K16302//metal transporter CNNM	GO:0050801//ion homeostasis;GO:0055065//metal ion homeostasis;GO:0009987//cellular process;GO:0055082//cellular chemical homeostasis;GO:0065008//regulation of biological quality;GO:0042592//homeostatic process;GO:0055076//transition metal ion homeostasis;GO:0055071//manganese ion homeostasis;GO:0030003//cellular cation homeostasis;GO:0065007//biological regulation;GO:0030026//cellular manganese i…
LOC110698542	K00679//phospholipid:diacylglycerol acyltransferase [EC:2.3.1.158]+ko01100//Metabolic pathways+ko00561//Glycerolipid metabolism;K14209//solute carrier family 36 (proton-coupled amino acid transporter);K10691//E3 ubiquitin-protein ligase UBR4 [EC:2.3.2.27];K01188//beta-glucosidase [EC:3.2.1.21]+ko01100//Metabolic pathways+ko00500//Starch and sucrose metabolism+ko01110//Biosynthesis of secondary me…	NA
LOC110713971	K07575//PUA domain protein;K15334//multisite-specific tRNA:(cytosine-C5)-methyltransferase [EC:2.1.1.202];K01051//pectinesterase [EC:3.1.1.11]+ko00040//Pentose and glucuronate interconversions+ko01100//Metabolic pathways	NA
LOC110734808	K11420//euchromatic histone-lysine N-methyltransferase [EC:2.1.1.43]+ko00310//Lysine degradation;K11339//mortality factor 4-like protein 1;K11420//euchromatic histone-lysine N-methyltransferase [EC:2.1.1.43]+ko00310//Lysine degradation;K11339//mortality factor 4-like protein 1	GO:0140096//catalytic activity, acting on a protein;GO:0008757//S-adenosylmethionine-dependent methyltransferase activity;GO:0016278//lysine N-methyltransferase activity;GO:0018024//histone-lysine N-methyltransferase activity;GO:0016741//transferase activity, transferring one-carbon groups;GO:0008170//N-methyltransferase activity;GO:0042054//histone methyltransferase activity;GO:0008276//protein …
LOC110723406	K10712//cysteamine dioxygenase [EC:1.13.11.19]+ko00430//Taurine and hypotaurine metabolism+ko01100//Metabolic pathways;K10712//cysteamine dioxygenase [EC:1.13.11.19]+ko00430//Taurine and hypotaurine metabolism+ko01100//Metabolic pathways	GO:0003824//catalytic activity;GO:0016701//oxidoreductase activity, acting on single donors with incorporation of molecular oxygen;GO:0016702//oxidoreductase activity, acting on single donors with incorporation of molecular oxygen, incorporation of two atoms of oxygen;GO:0016491//oxidoreductase activity;GO:0051213//dioxygenase activity;
LOC110709958	K15425//serine/threonine-protein phosphatase 4 regulatory subunit 2;K15425//serine/threonine-protein phosphatase 4 regulatory subunit 2	GO:1902494//catalytic complex;GO:0032991//protein-containing complex;GO:1903293//phosphatase complex;GO:0008287//protein serine/threonine phosphatase complex;GO:0030289//protein phosphatase 4 complex;GO:0005622//intracellular;GO:0098772//molecular function regulator;GO:0019208//phosphatase regulator activity;GO:0019888//protein phosphatase regulator activity;GO:0030234//enzyme regulator activity;
LOC110703973	K01114//phospholipase C [EC:3.1.4.3]+ko01100//Metabolic pathways+ko01110//Biosynthesis of secondary metabolites+ko00564//Glycerophospholipid metabolism+ko00565//Ether lipid metabolism+ko00562//Inositol phosphate metabolism	GO:0003824//catalytic activity;GO:0016787//hydrolase activity;GO:0016788//hydrolase activity, acting on ester bonds;
LOC110716562	K01303//acylaminoacyl-peptidase [EC:3.4.19.1];K15718//linoleate 9S-lipoxygenase [EC:1.13.11.58]+ko00591//Linoleic acid metabolism;K19525//vacuolar protein sorting-associated protein 13A/C;K08775//breast cancer 2 susceptibility protein+ko03440//Homologous recombination	NA
LOC110706950	K08867//WNK lysine deficient protein kinase [EC:2.7.11.1];K08867//WNK lysine deficient protein kinase [EC:2.7.11.1]	NA
LOC110691517	K09419//heat shock transcription factor, other eukaryote	NA
LOC110696128	K03544//ATP-dependent Clp protease ATP-binding subunit ClpX	GO:0006457//protein folding;GO:0009987//cellular process;GO:0097367//carbohydrate derivative binding;GO:0032553//ribonucleotide binding;GO:0017076//purine nucleotide binding;GO:0005488//binding;GO:0000166//nucleotide binding;GO:0032559//adenyl ribonucleotide binding;GO:0097159//organic cyclic compound binding;GO:0005515//protein binding;GO:0035639//purine ribonucleoside triphosphate binding;GO:00…
BGI_novel_G001894	K16573//gamma-tubulin complex component 6	GO:0097435//supramolecular fiber organization;GO:0065003//protein-containing complex assembly;GO:0031109//microtubule polymerization or depolymerization;GO:0009987//cellular process;GO:0022607//cellular component assembly;GO:0046785//microtubule polymerization;GO:0071840//cellular component organization or biogenesis;GO:0044085//cellular component biogenesis;GO:0016043//cellular component organiz…
LOC110731201	K04733//interleukin-1 receptor-associated kinase 4 [EC:2.7.11.1]	GO:1901363//heterocyclic compound binding;GO:0043168//anion binding;GO:0003824//catalytic activity;GO:0016772//transferase activity, transferring phosphorus-containing groups;GO:0000166//nucleotide binding;GO:0016740//transferase activity;GO:0097367//carbohydrate derivative binding;GO:0032553//ribonucleotide binding;GO:0140096//catalytic activity, acting on a protein;GO:0035639//purine ribonucleo…
LOC110707298	NA	GO:0009416//response to light stimulus;GO:0009314//response to radiation;GO:0009628//response to abiotic stimulus;GO:0009637//response to blue light;GO:0009605//response to external stimulus;GO:0009638//phototropism;GO:0050896//response to stimulus;GO:0009606//tropism;
LOC110738330	K01303//acylaminoacyl-peptidase [EC:3.4.19.1];K08176//MFS transporter, PHS family, inorganic phosphate transporter;K00799//glutathione S-transferase [EC:2.5.1.18]+ko00480//Glutathione metabolism;K04733//interleukin-1 receptor-associated kinase 4 [EC:2.7.11.1];K19525//vacuolar protein sorting-associated protein 13A/C	NA
BGI_novel_G001421	K22804//structural maintenance of chromosomes protein 6;K18195//rhamnogalacturonan endolyase [EC:4.2.2.23];K22048//mechanosensitive ion channel protein 4/5/6/7/8/9/10	NA
BGI_novel_G000178	K14810//ATP-dependent RNA helicase DDX56/DBP9 [EC:3.6.4.13]	NA
LOC110703808	K17895//GATA-binding protein 3;K21630//GATA-type zinc finger protein 1	GO:0031326//regulation of cellular biosynthetic process;GO:0032502//developmental process;GO:0080090//regulation of primary metabolic process;GO:0031325//positive regulation of cellular metabolic process;GO:2001141//regulation of RNA biosynthetic process;GO:1902680//positive regulation of RNA biosynthetic process;GO:0009889//regulation of biosynthetic process;GO:0065007//biological regulation;GO:…
LOC110710636	K11423//histone-lysine N-methyltransferase SETD2 [EC:2.1.1.43]+ko00310//Lysine degradation	NA
LOC110733410	K11346//inhibitor of growth protein 4	GO:0009987//cellular process;GO:0016043//cellular component organization;GO:0051276//chromosome organization;GO:0006325//chromatin organization;GO:0071840//cellular component organization or biogenesis;GO:0006996//organelle organization;GO:0043226//organelle;GO:0043229//intracellular organelle;GO:0005622//intracellular;GO:0043227//membrane-bounded organelle;GO:0005634//nucleus;GO:0043231//intrace…
LOC110684428	K22913//phosphatidylinositol 3,5-bisphosphate 5-phosphatase [EC:3.1.3.-]+ko01100//Metabolic pathways+ko00562//Inositol phosphate metabolism	NA
LOC110708836	K00799//glutathione S-transferase [EC:2.5.1.18]+ko00480//Glutathione metabolism	NA
LOC110725212	K17500//integrin-linked kinase-associated serine/threonine phosphatase 2C [EC:3.1.3.16]	GO:0031224//intrinsic component of membrane;GO:0016020//membrane;GO:0110165//cellular anatomical entity;GO:0016021//integral component of membrane;GO:0022857//transmembrane transporter activity;GO:0005215//transporter activity;
LOC110686796	K00799//glutathione S-transferase [EC:2.5.1.18]+ko00480//Glutathione metabolism;K16292//KDEL-tailed cysteine endopeptidase [EC:3.4.22.-]	NA
LOC110704217	K19525//vacuolar protein sorting-associated protein 13A/C;K00102//D-lactate dehydrogenase (cytochrome) [EC:1.1.2.4]+ko00620//Pyruvate metabolism;K14301//nuclear pore complex protein Nup107+ko03013//RNA transport;K12396//AP-3 complex subunit delta	NA
BGI_novel_G004068	K04733//interleukin-1 receptor-associated kinase 4 [EC:2.7.11.1]	GO:0016020//membrane;GO:0016021//integral component of membrane;GO:0031224//intrinsic component of membrane;GO:0110165//cellular anatomical entity;GO:1901265//nucleoside phosphate binding;GO:0030554//adenyl nucleotide binding;GO:0016301//kinase activity;GO:0097159//organic cyclic compound binding;GO:0017076//purine nucleotide binding;GO:0097367//carbohydrate derivative binding;GO:0005509//calcium…
LOC110728701	K03354//anaphase-promoting complex subunit 7+ko04120//Ubiquitin mediated proteolysis;K03354//anaphase-promoting complex subunit 7+ko04120//Ubiquitin mediated proteolysis	NA
BGI_novel_G002378	K10761//tRNA(His) guanylyltransferase [EC:2.7.7.79]	GO:0015630//microtubule cytoskeleton;GO:0005874//microtubule;GO:0043232//intracellular non-membrane-bounded organelle;GO:0110165//cellular anatomical entity;GO:0099512//supramolecular fiber;GO:0005622//intracellular;GO:0043229//intracellular organelle;GO:0043228//non-membrane-bounded organelle;GO:0099513//polymeric cytoskeletal fiber;GO:0099080//supramolecular complex;GO:0099081//supramolecular p…
[truncated: 46,552 more rows]
