# Supplementary material for: Transcriptome and Small RNA Sequencing Reveals the Basis of Response to Salinity, Alkalinity and Hypertonia in Quinoa (Chenopodium quinoa Willd.)
Source: Int J Mol Sci. 2023 Jul 22;24(14):11789. doi: 10.3390/ijms241411789 (PMC10380837; doi:10.3390/ijms241411789)
Supplement: Supplementary file 1 [file ijms-24-11789-s001.zip › Tab.S5 Small RNA sequence data statistics.xls]

## Sheet: data_statistics
Sample name	Raw tag count	Low quallity tag count	Invalid adapter tag count	PolyA tag count	Short valid length tag	Clean tag count	Percentage of clean tag(%)	Percentage of miRNA(%)	miRNA taq
A1	23195999	551105	397949	1072	345776	21900097	94.41	2.36025	547484
A2	23376044	467193	324646	788	206712	22376705	95.72	1.9144	447511
A3	24292068	510678	406780	1560	269525	23103525	95.11	1.33154	323459
C1	23503133	105382	379978	1276	229990	22786507	96.95	1.5512	364581
C2	23422991	104658	352129	1598	204881	22759725	97.17	0.9717	227601
C3	24115771	109709	354899	1402	162748	23487013	97.39	1.36346	328809
P1	24657549	101474	380515	1532	192364	23981664	97.26	1.16712	287783
P2	24360805	97838	433306	1371	230384	23597906	96.87	1.54992	377573
P3	24369749	110393	380964	944	123824	23753624	97.47	2.04687	498817
S1	23244625	92855	367742	2331	393247	22388450	96.32	1.63744	380617
S2	24675103	105503	393375	1737	224840	23949648	97.06	1.35884	335295
S3	23204871	105368	450828	2007	230802	22415866	96.6	1.0626	246575
