# Supplementary material for: Transcriptome and Small RNA Sequencing Reveals the Basis of Response to Salinity, Alkalinity and Hypertonia in Quinoa (Chenopodium quinoa Willd.)
Source: Int J Mol Sci. 2023 Jul 22;24(14):11789. doi: 10.3390/ijms241411789 (PMC10380837; doi:10.3390/ijms241411789)
Supplement: Supplementary file 1 [file ijms-24-11789-s001.zip › Tab.S6 Identification of miRNA in quinoa.xls]

## Sheet: known_miRNA
#miRNA id	mature	hairpin
miR171a_3	TGATTGAGCCGTGCCAATAT	AAGGGGTTTGCCAAGGGGTGATCTGAGTCGTTGATTGAGCCGTGCCAATATCAAGTGTACTTGTTGTGAGTCGTTGGATTCGAAGGCTTGAGCTGCTCGTATGAGATCGTCTAGGAAATCGAGTCCGAATGACGTGTTGCTGACGTTGTTGTTAGTTGCCGTTGTCTGATGATGATGATGAAGTTGTTGTTGTTGTTGTTGCTGTTGTTGTTGTTGATGATCGAAGGGGCCGAAATTCGGGTTGAGGTTTTGATTGTAGGAGAAATCGCAGAAGTTGGCATAATCTGAGGGTAGGTCTAA
miR399j_2	TGCCAAAGGAGAGTTGCCCTA	ATAGAGCATTTTAATTAAGTATATTTCAAGGATATGCCAGTTTTTCTAGACTTAAACTCCATGTTTAAGATAACAAAGCCCCCCTATATATACAGAGAGCTCCTCCAAAGGTAAAACTCGTGAAAGGCAACTGACTCACAAAATTGGAAGTGTAGGCATTTTTTGAGTTGCCATTACATGAAGCAAGTGAATTAGTCATGGGGCGAATCTTCCTTGGCATGTGATGATACAATGGCATGGACTTGTTAAAATGTTATGCATGTTTGGTTGCCATTCACTTGCCAAAGGAGAGTTGCCCTA
miR398b-3p_1	TTGTGTTCTCAGGTCACCCCT	TGTCAAATAACTACCAATGTCGTCATGTGACAACATAATGTCATGATTTCAACCTTATAAAATATCAAGAATATCAATTATATGCAAACAAATGTATTAAATCGATCAAGAGGCCAATACAAATGAAACAAGAATTGaaguucuaaaaaaaaaaaaaaaaaaaaaaggagauacACCCCAGAGGAGTGAAAACTGAGAACACAGGATGTAATTAGCTTAATTTGCATTATTAAGATTGCTAATTATCTCTTGTGTTCTCAGGTCACCCCTTTGGGAAATATCTTGTuauucaauauuauu
miR398	TGTGTTCTCAGGTCACCCCT	GTCAAATAACTACCAATGTCGTCATGTGACAACATAATGTCATGATTTCAACCTTATAAAATATCAAGAATATCAATTATATGCAAACAAATGTATTAAATCGATCAAGAGGCCAATACAAATGAAACAAGAATTGaaguucuaaaaaaaaaaaaaaaaaaaaaaggagauacACCCCAGAGGAGTGAAAACTGAGAACACAGGATGTAATTAGCTTAATTTGCATTATTAAGATTGCTAATTATCTCTTGTGTTCTCAGGTCACCCCTTTGGGAAATATCTTGTuauucaauauuauua
miR398a-3p_1	TGTGTTCTCAGGTCACCCCTT	GTCAAATAACTACCAATGTCGTCATGTGACAACATAATGTCATGATTTCAACCTTATAAAATATCAAGAATATCAATTATATGCAAACAAATGTATTAAATCGATCAAGAGGCCAATACAAATGAAACAAGAATTGaaguucuaaaaaaaaaaaaaaaaaaaaaaggagauacACCCCAGAGGAGTGAAAACTGAGAACACAGGATGTAATTAGCTTAATTTGCATTATTAAGATTGCTAATTATCTCTTGTGTTCTCAGGTCACCCCTTTGGGAAATATCTTGTuauucaauauuauua
miR828a_1	TCTTGCTCAAATGAGTATTCCA	TTTTCGTCATTTTATCTCTTTGTAATGTTTCTTGCTCAAATGAGTATTCCAATCACTTCAGCAAGAAGGCTAGGTATAAATTAGAAAATTGTTGTTTTTAATTACTAAATTTTTTTATTGTATTTTACAACGGTATTTTGAAAATTGAAAAATTGTTCATTTATTAAAAGAAAACCGCCTTTTCTTATTACGATTTTTGGAAAATGCTGATGATTGATTGAAATGCTCATTTGAGTAAGCAATATTATGACAAGAGGCTAATTTCAAGTTTGTGATATACCTCCTTTATGATTGATCTAT
miR169h-3p_1	GGCAGTCTCCTTGGCTATT	TTTATGTATAAAGAAGTAATGCATTAAGATCTTGACATACATTCATACATTATTGCAATAAAAAATTGCAAGAGTAGATCATATATATATATATATATAATGGTTTGCAAAAGAGGGGAGAGGAGATCGATAGTGTGTGTGCGCATGCGCGTGTGCGTGAAGCCATGAAGGGAGATGGCTTACATGAAAATGAGAGTGATACGTTGAGTAGCCAAGGATGACTTGCCTGCACCTCGGTGTAGCGAGGGTTGTCGTCTATTGATGCTCTCTAAGAGGTTTCAGGCAGTCTCCTTGGCTATT
miR169m-3p	GGCAGTCTTCTTGGCTATC	TCTTATAATATATACTTGCATTATACCCATTTTGGTGGGCTATATATAGGAACATATTGCACACAATACTATCATACAAATTCAAAGATAAATGAGTACTTCTCCTATATATAATGTATTGCATAAATAATGCATGAAACGTTCGTTACGATTTTGGTGTCATGAAGAAGAGAAGGCCTTACATGAAGGTGAGAGTTCGATAATTGTTTGGTAGCCAAGGATGACTTTCCTGCTTTATTAACTTTTGGTTGAGAGTTTTCTCAACCAAATCGTAGTTGCCAGGCAGTCTTCTTGGCTATC
miR399f_3	TGCCAAAGGAGATTTGCCCGG	CTTTAGCAAAATTGGAGGAGTTAAGTTCACTGCCAAAGGAGATTTGCCCGGCAATTCAGATATGCATGGTAGAAGGTCTGGTAAAGGTACTCTTAGCCTGGTTCCTTAGAAGGGGAAATTCTGTTTATTCATGCAGTGATGAATGATTCTCTGCAAGGGTAAGTTTCGAGTGTATTTCTTTTGAGGTTTGCAGCTGGTACTATAGAAGATAAAGTGAAGGGAAGTCATAAATATAAAATATGCATGGTTTGCATCCTTATTTTATTTGATGTTAGTTCGTTTAACTTTGCTTTTAAAAAT
miR399_1	TGCCAAAGGAGAATTGCCC	TTAAGGAGAAAGCTTAGGGACCATATTCCATAAATATGATAGAGAAGACCCACTTGTGCGCTGTCCTAGCATATGCTGTAATTTTCTATGGAATATCCATGAGTAATTCAGGTATAAATACGGCATTGAATAAGTCCCGAGCCAATTAGGCAGAGGTTTCAGAAGGCAAATTGTGGTTGGTGATGGTGAATGACAGTGCAATTCTCCTTTGGCATACAGTCCATGCTCATACATTGCATACTTCTGTTGTGCCAAAGGAGAATTGCCCTGTATTTTACTACCACGGTTATTTCGATTCAC
miR408b_1	TGCACTGCCTCTTCCCTGGCT	TACAAACCACAAAAATAGGCTTGTAAATGCATATAATTTTTTTCTTCTCAATTTTTCTACACATTCTTTAATCATTATATCAATATAGCTGATTGTATTCACGAGTTTGCTTGGGTATTTTTGTATTTCCATTTGATGTGTCGAGAGTATTAAATAAGGTGAGACATGTAGGGAGGAAAGAGGGACTACAGAAGAGATATCAAATGAAAGACGGGAAAGAGGTTGCGCAAAGATAGAGCTACTTAACAAGTTGATCATTTATGTTGTTGGCTCTACCTTTGCACTGCCTCTTCCCTGGCT
miR4995	AGGCAGTGGCTTGGTTAAGGG	TGCCTATTGAAGAATGAGCCGGCGACTCATAGGCAGTGGCTTGGTTAAGGGAACCCACCGGAGCCGTAGCGAAAGCGAGTCTTCATAGGGCAATTGTCACTGCTTATGGACCCGAACCTGGGTGATCTATCCATGACCAGGATGAAGCTTGGGTGAAACTAAGTTGAGGTCCAAACCGACTGATGTTGAAGAATCAGCGGATGAGTTGTGGTTAGGGGTGAAATGCCACTCGAACCCAGAGCTAGCTGGTTCTCCCCGAAATGCGTTGAGGCGCAACAGTTGACTGGACATCTAGGGGTA
miR159b-3p	TTTGGATTGAAGGGAGCTCTT	TACACTGAAAAAGAGAGAATCacccaauaaaaaaaagcuaauuacaCATGTAAACTCACAAATTCAAGATTGATAAACCTGAGAAAAGCAATTAAACTGCTAATGACGCATGCAAATTCACaaauuuauaauaaauaaaCCTCAAAAACGCAATTAAACAGCTAATTAGAGAGGTATACTCACAAATTTATTCACCAGTAAACCCGACGGAACGAATAAATACGCGGCCTGAAAAGAAACCCATCGCAATTTGGATTGAAGGGAGCTCTTGATTTTTGGACAGGACTTAGCAATTTTTGG
miR399f_1	TGCCAAAGGAGAATTGCAC	TGCACAAACTCTGTTCGGGTAACATACTGTAACAATGCCTATGTGCAATGCTGCATACGAATAAGACGGTCAAAGAAAAAGCACATTTCCTTTCATACAATTGACAGGGAAAAAGTAAGAGCATTGCACATAGGAAGAGAATTTAGAAGAAGAAAACTGCTTAGCAATTTCAGTAGAAATGTTTTGGACTGAGAAGTTACTCAAAATAAACGTGGTAGTGAATTACAGGGCAATTTTCCTTTGGCACAACAGAAGCATGCAATGTATGAGCATGGATTGTATGCCAAAGGAGAATTGCAC
miR162a-5p_1	GGAGGCAGCGGTTCATCGATC	CTGCAATAATTTGTTGCACTTTATCTGTTTAACCCCTTATAATGTTTAACAATTTTGATTATGAGATCTGGGuuuauuaagauuuuuuuuguugaucaauuaauuacuuuaauuuugcATTGGGuuuaaccucuuuuuuuuuuuuuuuuuuuuuuuuuuuuuuuuuuuuuuuaauuuaauaauaauuucugTATTTATTTACTggauuaguuuuuuaaaaaucuGTGATAAAATTGAGTTAAGGGCACTGGAGGCAGCGGTTCATCGATCTGTTCCTGAACTGGGTATTCTTGTACATTC
miR162a-5p	TGGAGGCAGCGGTTCATCGATC	TCTGCAATAATTTGTTGCACTTTATCTGTTTAACCCCTTATAATGTTTAACAATTTTGATTATGAGATCTGGGuuuauuaagauuuuuuuuguugaucaauuaauuacuuuaauuuugcATTGGGuuuaaccucuuuuuuuuuuuuuuuuuuuuuuuuuuuuuuuuuuuuuuuaauuuaauaauaauuucugTATTTATTTACTggauuaguuuuuuaaaaaucuGTGATAAAATTGAGTTAAGGGCACTGGAGGCAGCGGTTCATCGATCTGTTCCTGAACTGGGTATTCTTGTACATT
miR162a-3p	TCGATAAACCTCTGCATCCAG	ATCTGGGuuuauuaagauuuuuuuuguugaucaauuaauuacuuuaauuuugcATTGGGuuuaaccucuuuuuuuuuuuuuuuuuuuuuuuuuuuuuuuuuuuuuuuaauuuaauaauaauuucugTATTTATTTACTggauuaguuuuuuaaaaaucuGTGATAAAATTGAGTTAAGGGCACTGGAGGCAGCGGTTCATCGATCTGTTCCTGAACTGGGTATTCTTGTACATTCATTGCAGCAATCGATCGATAAACCTCTGCATCCAGCGCTTTATAACTGTTTTAATTAATCTAAGA
miR156e_1	CTGACAGAAGATAGAGAGCAC	TGTTAAAGAGGAGGCAGTGGTGAATGGAAGCTGACAGAAGATAGAGAGCACTGAGGATGATATGCAGATTAAATTTGCTGCATCTCAACTCCTTTGTGCTCTCTATGTTCTGTCACCACCTTTAGCCCCTCTATCCTTAATTTAATTTAATTACCAATTATATTTCGTTGCTTTTCATTTCTTGGTTCATGTAGCCGACTTTAACATTGATTGGGATTAAGGTTTCGATGTTGTTGCAATTGTATGTATAATAGGCGAATGCGAGGCGCTGACAGAAGATAGAGAGCACAGATGGATGAA
miR156b-3p_6	GCTCACTGCTCTTTCTGTCAGCT	GAAAGAAAGACAGGAAACCCTTGTTTTTGCAAAAATTCAGTGGGTACTGAAATATTACCCAATTTGGTAAGTCGTTTTTTTACAAATGGGugggaggagugagaaauuGACAGAAGAGAGTGAGCACAGAAAGGCAGAAATGGTATACATAGCAAACCCAAACCAACACCAGAAATCATACATTTAATTTCCAAAGATCGAAACATAGAGTTGGGGTTGAAGATTATTGGTATACTATTCCTTTTTTGTGCTCACTGCTCTTTCTGTCAGCTTCCCTTCCAACTCCAACCCCACCCGAAC
miR395a_5	CTGAAGTGTTTGGGGGAACTC	GGGGGAACTCTAGGTGGTACTTGACAATGTAAGGTaacauuuugauuuuuggggaagAGCAGGTATCTGTTCTGCTGTAGTATTAAGCAACTTTCAAAGATTTACCATGAAACTTTGCCTTAAAAAAATATGTAGTACATTGAAATGCATTTGGTATTCTCAAACAAAAGAGGTCAGGTGTCCTCAGGAGTTCCCTCGGAACACTTCAATGGGGATACATATGGCTTCTCGAAATGAAGCTTTTCTCTACTGAAGTGTTTGGGGGAACTCTTGGAGGTACTTGATATTGTAGAGTGACAA
miR169	CAGCCAAGGATGACTTGCCTA	uuGTGCATATCCAGCCATAAAGTTCGTAGAATTGATTCCAGTCCATTAATTCAGAATCACTAAAATCTTAGAGGATGCTGATTTATATGGCAAACAATCAGATTCTAGTTAAACCACAAAGCAAAATTCAGTATAAATGACTATTCTGCCTACACACAACATGTATAAATTCAAGTAAAACTGAGGTTCTCTAAACAGCTGTGTTAGAGGAAGAGAGTCCCTGCATGAGGATGGAGAGTCATTTTCAGGCAGCCAAGGATGACTTGCCTACAGTTCTCTGTAGGTTTTCTATGCACAAGA
miR395b_3	TGAAGTGTTTGGGGGAACTC	TAACCTACCCTATTATGATGGCTAGGTTCATATATCTGACCTTTTTACTTAGCTTTCGTGTAAATGATTTTCTCTTTAACAACAAATTGGAATTTACCATGATAAAATGTTGCTATAAATAATTGAATTGGTGGCTCTTGCTTCTATAGCAAAATTATGAATTTAGGGTTCAGTAAATGGAGTTCGTAAACGTCTATCATCACTTGTTTCCTAGAGTTCCCTCCAAACACTTCTTAAGGGTAACGGATCGAGCTATAGGCAGTAGAAATTTTGCCCTAATTGAAGTGTTTGGGGGAACTC
miR399b	TGCCAAAGGAGAGTTGCCCTG	CATATATTTCAAGGATATGCCAATTTTCCTATAGTTAAACTCCATGTTTAAGATAACAAAGCACCCCTATATATACAGATAGCTCCTTCTCAGGTAAAACTCGTGAAAGGCAATCGACTCACAAAATTGGAAGTGTAGGCATGCATTTTTCTGAGTTGTCATTACATAAAGCAAGCGAATTAGTCATAGGGTGAATCTTCCTTGGCATGTGATGAAGCAATGGCCTGGCCTTGTTAAATTGTTATCTCTTGCCAAAGGAGAGTTGCCCTGTGACTCCGTCAGCTTGATGATTTAGTGTAA
miR319a-3p	TTGGACTGAAGGGAGCTCCC	ATACAAGTAGTAGTTATGTTGTAATTGCATguguuagaauuuauauauauuuggaTATGTTAGGAATGAAGAAGTAGTGTAAGAGAGCTTCCTTCAGCCCACTCATGGATGGAAAAAAGGGGTATAGAATTATCTGCCGACTCATTCATTCAAACACTTAGTAGTACGAAATATTATCGAAATTTGTAATGTACTACTGTGATTGCATGAATGATGCGGGAGATAGTTTCCATCCTTCTCTCTCTTTGCTTGGACTGAAGGGAGCTCCCTTTCTCTATTCCCTTCTTTTTTTCGCATTTT
miR319c_2	CTTGGACTGAAGGGAGCTCCC	AATACAAGTAGTAGTTATGTTGTAATTGCATguguuagaauuuauauauauuuggaTATGTTAGGAATGAAGAAGTAGTGTAAGAGAGCTTCCTTCAGCCCACTCATGGATGGAAAAAAGGGGTATAGAATTATCTGCCGACTCATTCATTCAAACACTTAGTAGTACGAAATATTATCGAAATTTGTAATGTACTACTGTGATTGCATGAATGATGCGGGAGATAGTTTCCATCCTTCTCTCTCTTTGCTTGGACTGAAGGGAGCTCCCTTTCTCTATTCCCTTCTTTTTTTCGCATTT
miR319c-5p_3	AGAGCTTCCTTCAGCCCACTC	AGAGCTTCCTTCAGCCCACTCATGGATGGAAAAAAGGGGTATAGAATTATCTGCCGACTCATTCATTCAAACACTTAGTAGTACGAAATATTATCGAAATTTGTAATGTACTACTGTGATTGCATGAATGATGCGGGAGATAGTTTCCATCCTTCTCTCTCTTTGCTTGGACTGAAGGGAGCTCCCTTTCTCTATTCCCTTCTTTTTTTCGCATTTTTCGATTGCTTATTTTCATGAACAAGTTTTGATTGTATAATTTGTTATTGATGATAATTCAAATGTTGTTTCATGGTTTAGTTG
miR408d	TGCACTGCCTCTTCCCTGGC	AATATATATACAAACCTCTAAAGTAGGCTTATAAATGCGTGTAACTTCTTACTCACAAATCTTATTATTCTATACGTAGTATATTTATACGGAGTAGTTGGTTTATTGTTGGGTATTTTTGTAATTTCATTTGATGCATCGAGAGTATGAATATAAGGTAAGACATGTAGAGAGGAAACAGGGACTACAGAGGAGATATATCAAATGAAAGACGGGAAAGAGGTTGCGCAAAGATAGAGCTACTTAACAGGTTGAGCATTTATGTTTTTGGCTCTACCTTTGCACTGCCTCTTCCCTGGC
miR398b-3p	TGTGTTCTCAGGTCACCCCTG	TAGTACCACAACATTTCATGTAGTACAACACTGGAGTACTCGTGTACTATTCTGGTTGCACTATAAAAACAACATCCAGAAATCTTAGTAACAATTACCAACAATTCAGCACAATATCATGAAATTATGAAAATAGTTTGTATTATAACAGGTGGTGAAGTCCCACAGGAGCGACCTGAGACCACATGGCTGAGGCATATGCACCTTCCCAAACCAGATCACCTATTTAAGGGTGGTTTAGCTCAGGGTTCTGGGTAGGTTGCTATCCTGTGGTGCACATGTGTTCTCAGGTCACCCCTG
miR168b_1	TCGCTTGGTGCAGGTCGGG	TCGCTTGGTGCAGGTCGGGAACTGGTTGAAATTAATGTTCCGCCGCCGTAGTAGCCGCCGCGTAATCAGCGGCGTGAGTTTAATTGTTTCTGCTTAGCCGGTGGTATTCCGGATCCCGCCTTGCATCAACTGAATCGGAGTCTGTGGTGAATTACTTACTCGTTTTTTTATCAGATCGGATGAGTTTTGTTTTCGTGGTTCATTTTGAGCTGGTTATTGAuucauuucuuuguuuuuuuguauugauugauuguugguuaauguuguuggauugauuuugauagcuuuuugguugauuug
miR168	TCGCTTGGTGCAGGTCGGGA	TCGCTTGGTGCAGGTCGGGAACTGGTTGAAATTAATGTTCCGCCGCCGTAGTAGCCGCCGCGTAATCAGCGGCGTGAGTTTAATTGTTTCTGCTTAGCCGGTGGTATTCCGGATCCCGCCTTGCATCAACTGAATCGGAGTCTGTGGTGAATTACTTACTCGTTTTTTTATCAGATCGGATGAGTTTTGTTTTCGTGGTTCATTTTGAGCTGGTTATTGAuucauuucuuuguuuuuuuguauugauugauuguugguuaauguuguuggauugauuuugauagcuuuuugguugauuug
miR319a	CTTGGACTGAAGGGAGCTCC	GTTATATTGTGACTTATTATGTAGTGAAGCTAATGAATGAAGTGAAGAGAGCTTTCTTCAGTCCACTCACAAGAAGGGTTGGGATTTAGCCTGCTGTCGACTCATTCATCTCACCTACTTTGCGTGCGCATATGCATGAGATCGAGGAACAAGGCCTGTGACTCTGTGAGTAATGTTTCCACTTAAGCTAGATCGTGTTCACAACTGCGGGATAAAGATGCCGCGCTGAGTAAATGAGTGAATGAAGCGAGAGTCAAGTTAGATCTCAGACTTCCTGTATCTTGGACTGAAGGGAGCTCC
miR157d	TGACAGAAGATAGAGAGCAC	TTGATACTATTTTAAGATGTCCGACAACAAATAGCCCAAGTTTTAGGAAAGGTACGGCGATGACAGAAGATGGGGAGCGCAAAGGGAGTGAGGTGCAACTTCATGGGCATTTCACCCATCTGTGCTCCCTATCTTCTGTCAACAACTTTGCATCATTAAACTaagaaaauaucaaaauuaaaaaagaaagggaaaaaaaaaaaguuuauagacaaaagaaauagaaaaagagagaggggCTGAAGGTGATGACAGAAGATAGAGAGCACAAAGGAGTTGAGATGCAGCATATGTAATCTG
miR5139	AAACCTGGCTCTGATACCA	TGGTCTCTCTCTGTCACCCATAATTTCTACACAAACACAGTTAGTTTATGCAAAAATCTTGATTAAAAGATCGAATCTTGGATGAATAATGAAGCAAAACAAAATCGGGTTCTCAACTGCAAATCAGTGCAGCAACACCAAAAGTTTGAGGCTGTGTAGAACTCGTTACTTATCCAAAAATTACGAAATTTTAGGACGTGGTAGTTGGACGTTTTTGGAGTCCAACGCAAAAAGAATCACTCAAAAATTCCCAGTACAACGTTCCCAGTTTAAGTTTTATCAAACCTGGCTCTGATACCA
miR164f_1	TGGAGAAGCAGGGCACATGCT	GAAGATTAGAAGAGGGTAAGTTAGCCATGTTGGAGAAGCAGGGCACATGCTTAATATATTGTGTTTCAACACTTATATTCGATCACGAAGAAATATGTAGGCTTGTGCCAAGCTTCTCCACTCGGTATCTTGCCCTTGGTGATCATTAGCCAGATTGTGCAAAACTATCCGAAAAATTATATAGCCAATCTGCATTCAGATCCAAATTTTGGATTGGATTATGGATACTAGATTCATATTCAATGTGCTATACTATGAATATGGGATACATACTATTATACTGACTTGTTGATCTTGTAG
miR319a_1	TTGGACTGAAGGGAGCTCCCT	TTTATATGTTAATTTGTTACTTATTTTATAGTGAAGCTAATATAATGAATCAAGTAAAGAGAGCTTTCTTCAGTCCACTCACAAGAAGGGTTGGGATTTAGCCTGCTGTCGACTCATTCATCTCACCTACTTTGCGTGCGCATATACATGAGAGGAGGAACAAGGCCTAGATCGTGGTTACAACTGCGCGAAGTGGTTACAACTGCGCGATAAAGATACCGCGCAGAGTAAATGAGTGAATGAAGCGAGAGTCAAGTTGGATCTCAAACTTCCTGTATCTTGGACTGAAGGGAGCTCCCT
miR319b-5p_2	GAGCTTTCTTCAGTCCACTC	AGTGAAGCTAATATAATGAATCAAGTAAAGAGAGCTTTCTTCAGTCCACTCACAAGAAGGGTTGGGATTTAGCCTGCTGTCGACTCATTCATCTCACCTACTTTGCGTGCGCATATACATGAGAGGAGGAACAAGGCCTAGATCGTGGTTACAACTGCGCGAAGTGGTTACAACTGCGCGATAAAGATACCGCGCAGAGTAAATGAGTGAATGAAGCGAGAGTCAAGTTGGATCTCAAACTTCCTGTATCTTGGACTGAAGGGAGCTCCCTTTTCCTTTTCTTTTTTAATTTCTAATTAC
miR166a	TCGGACCAGGCTTCATTCC	TATACAGGAGAATAAATGTAGCATATCTTATCTATATTCTGAACGAAGGATCGGAAGATGATCCATCTAAGGTGGTTGTTATGTTGAGGGGAATGTTGTCTGGCTCGTCGACACCAATCCATTACTCATTCCagccauauauauauauauauguauaacaCTTACATTAACATGAATACTATCTATCATCTATCATTATTACATAATAATCTAAATGGAACGTATGAGATAGATGATGATTTCGTGTTGTCGGACCAGGCTTCATTCCCCCCAACTACTAGTTcguuguuuucuuucuuu
miR156e-3p_2	GCTCTCTGTGCTTCTGTCATCA	TACTGCTATTGCACTTCACTTTCCTTCGTGCTCTCTGTGCTTCTGTCATCATCAGTTCCTGCCTCTCTTCTAGCTTTCTCTCTCTTCCCTCTAAATTGCTCTTTGTTTCCTACTATTACTATTAAATTTTATCATTTTTGTTGATGTGATGATGATATTCTTATAGGCTTGTCCGTTATCAGTCCTTTCGAGTTATCGATTAGAAGCTAAGGATTGTTTGTTGTCGGTTTTCAAAATAAAATATGATTAGTGTCGCATATAACTGTTTTACATATGATATGACTATGTATGAGTTTGGAA
miR157a-5p	TTGACAGAAGATAGAGAGCAC	GAGCAAATTAAAAAGTGGTGGGGGAAGTTGTTGACAGAAGATAGAGAGCACAGAGGATGAAGTGCATTGGGATATTTGGATTTGGGGTACTACTTAAAGCTTAGCTTGCTATCATTATTATTATTACTGCTATTGCACTTCACTTTCCTTCGTGCTCTCTGTGCTTCTGTCATCATCAGTTCCTGCCTCTCTTCTAGCTTTCTCTCTCTTCCCTCTAAATTGCTCTTTGTTTCCTACTATTACTATTAAATTTTATCATTTTTGTTGATGTGATGATGATATTCTTATAGGCTTGTCCGT
miR156_2	TTGACAGAAGATAGAGAGC	GGGAGCAAATTAAAAAGTGGTGGGGGAAGTTGTTGACAGAAGATAGAGAGCACAGAGGATGAAGTGCATTGGGATATTTGGATTTGGGGTACTACTTAAAGCTTAGCTTGCTATCATTATTATTATTACTGCTATTGCACTTCACTTTCCTTCGTGCTCTCTGTGCTTCTGTCATCATCAGTTCCTGCCTCTCTTCTAGCTTTCTCTCTCTTCCCTCTAAATTGCTCTTTGTTTCCTACTATTACTATTAAATTTTATCATTTTTGTTGATGTGATGATGATATTCTTATAGGCTTGTCC
miR319f_1	ATTGGACTGAAGGGAGCTCC	AAATTGGGAGATGAACTAAAAACATATCATTATCTaaaggagagaaagagagauagaGGAGCTCCCTTCAAATCCAATAGAGAGGGCTGAGAAGTGGTAAAGAGCTGCCATTTCATGCATTTCTGGCCATTTACTTGCATTCTTTGCGACTACGATGATGGATAACCGGAAGAAGGTGAAGTTCGAGTAGGACTATGGGTTTTGTTTCGATTATGTGGGAGCAACTCCTTCCACTAGCTTCGTTCGCTCATTGGACTGAAGGGAGCTCCATCCATTCATTTCGTTGTCTGTCACTCTTTC
miR159c_6	TTTGGATTGAAGGGAGCTCCT	TTATATTATTTCTTTCAAAGAGAATAATTAGTTTGTTGTTAAATAAATAAAATATATATACTCTCTCCATCTTTAAAAGTAGTATTCGAGAGAATACTAGGTGAGATAAGAATGGTAGGTGGGAGCTCCTTTTGGTCCAAAAACAGGAAAGAAAGAGAAAGGTAGAAACATCTGCTAGTTCATGGATAACCTATGGAGTTGATTACACTTGATTACTTGGGTCAACTCCAATGGCTTTGCATGACCTTGGAGATGTTCTTTTGCCTTCTCCTTTTCTTATTTGGATTGAAGGGAGCTCCT
miR171n-5p	TATTGGTGAGGTTCAATCCGA	ATTGGTTTAGGAGGCAAAGAGAGGAAGCGATATTGGTGAGGTTCAATCCGAAGACGGATCTTACAGGAACTACAAGTGTAAGATACGATCTCAGATTGAGCCGCGCCAATATCACTTTCTCCACCATTCAGCTTTAGTTTTCTTTCCTTCTTAATTGCCTTTCAGATTTGTTCCTCTATCAATGTTCTCTGACTGCTTTTATGGATACCCTTTTGTTAAAATTATATATAATCATATGTTTTGTGCATGATCTGTTATAAAGTTGCATATTTTTTTCTCCTTTTACTGCATAATTTAGTT
miR171d_1	TTGAGCCGCGCCAATATCAC	CCTCTTTATAAGTGGTGTATGGGACCATTTTTCTTCTTTTTATTTCCCTTTCAAAAGGCTTAACTTTTTTGTTGATCAACCTTTTTAGTCAGCTTGTAGTTTGGACTCATTATTACAAGAATGTTTGAATTGAACACAATGATTATTTGAACTTAACTTTGCGGATCATGTAATTGAATTGATTGATTGGTTTAGGAGGCAAAGAGAGGAAGCGATATTGGTGAGGTTCAATCCGAAGACGGATCTTACAGGAACTACAAGTGTAAGATACGATCTCAGATTGAGCCGCGCCAATATCAC
miR396a-3p_1	GTTCAATAAAGCTGTGGGAAG	uucuucuuuucuuucucucuccacuuuuuuuuuuuuuuuucuuuucuaggguuuuuuuuuucauagccCCTTTCATCATATCTCTATGATTATATCAAAACCATATTATATATACCATTTTCTCGTATAATATATgguucuauuuuuauuuuuccacaGCTTTCTTGAACTGCATCTCTAuuuuucaugauauuuuucaugATTTCGGTAATTCTTGTAAAAAACAAAATGTGAAAATTCTGGGTTGCGGTTCAATAAAGCTGTGGGAAGATACAAATAGAATCACCCAATTATTCTCga
miR171c_3	AGATTGAGCCGCGCCAATATC	TGCCTCTTTATAAGTGGTGTATGGGACCATTTTTCTTCTTTTTATTTCCCTTTCAAAAGGCTTAACTTTTTTGTTGATCAACCTTTTTAGTCAGCTTGTAGTTTGGACTCATTATTACAAGAATGTTTGAATTGAACACAATGATTATTTGAACTTAACTTTGCGGATCATGTAATTGAATTGATTGATTGGTTTAGGAGGCAAAGAGAGGAAGCGATATTGGTGAGGTTCAATCCGAAGACGGATCTTACAGGAACTACAAGTGTAAGATACGATCTCAGATTGAGCCGCGCCAATATC
miR396b-5p	TTCCACAGCTTTCTTGAACTT	GCGAAAATAGAAGTAAGTCCTGTCATGCTTTTCCACAGCTTTCTTGAACTTTCCTCTTCTCCGTCATCTCATTTGTTCGTCTGTTAGTATTACATCTCCTCGCTCTAACGTGGAATGGTACGAACGAACGGCGGTTGAGGAGATTACTATACATGACGAACTGAATGGCAATTCGAGATTAAATTGAATTTTATCCGCGGAAAGTTCAAGAAAGCTGTGGGAAAATATGGCGTGGGTTTTTATATATAGATGGCTGTTCTTCATGACACATATTCAGATGAATAAACAGTAAGATTTTCC
miR171f_3	TTGAGCCGCGCCAATATCACT	CTCTTTATAAGTGGTGTATGGGACCATTTTTCTTCTTTTTATTTCCCTTTCAAAAGGCTTAACTTTTTTGTTGATCAACCTTTTTAGTCAGCTTGTAGTTTGGACTCATTATTACAAGAATGTTTGAATTGAACACAATGATTATTTGAACTTAACTTTGCGGATCATGTAATTGAATTGATTGATTGGTTTAGGAGGCAAAGAGAGGAAGCGATATTGGTGAGGTTCAATCCGAAGACGGATCTTACAGGAACTACAAGTGTAAGATACGATCTCAGATTGAGCCGCGCCAATATCACT
miR162-3p	TCGATAAACCTCTGCATCCA	TATCTGTTTAATCCCTTATCATGTTTATTAATACTGATTATGAGATCTGGGTTTATGAAGATGATTTTTGTTGATcaauuaauuucuuuaauuuugcauuggguuuaacuuuuuauuuauuuauuuuauuuauuuacuggauuaauuuuuuuaaaaucuguGATAAAATCGAGTTAAGGGCACTGGAGGCAGCGGTTCATCGATCTGTTCCTGAACTGGGTATTCTTGTACATTCATTGCAGCAATCGATCGATAAACCTCTGCATCCAGCGCTTTATAACTGTTTTAATTTATCTAAGA
miR164c	TGGAGAAGCAGGACACGTGAG	TCATCTCTGTTCCATGGTTCTCAAGGATAGCCTTAAGAATATGTTGTTCTGACATCATGTAATTCCCTGAATAATGGCCTGTTTGAGAAGAAGGATAATAAGAACTATTGCCACTTCCAAACCTAAAATAAGGATTATCACTTGGATTCGAGGGAATGGAATTGTAAGGATTGTTTATTAGCCCATCAAAGGAGGGTTGTTGATTAGTGTTATGGTAATGGCTTGTTTGGGCTGTAGTTTCCATGGGGTTGGAGAAGCAGGACACGTGAGGAGCACCATAGTTGGTATTGTAAGGTGATG
miR1511_1	ACCTAGCTCTGATACCATGAA	GGAGGTTTCATCCAAAATTCATATGACAATAGGAGTAACCCCTTAGCCTTGTAAAGTGTACTATTTAACTCTCTCTTCTTTTCTTAATGTGGGACACTTACATGTGTTGTTTGGGAAGTTTATACTTCAATACTCCCCCTCACATATAAGATCCCTTAAATTTCGTCTCCGGTAATGTTTCATGGGCTAGAGCGCATTTTTTCACTCCTCCTCACACGAACCCACTCAATTTGGCCCAGTGTACTCATTACTCAAGCCATTAAAGGTTCCAAACCGTAAACCTAGCTCTGATACCATGAA
miR1436	ACATTATGGGACGGAGGGAGT	AATTACAATGTTATTTGAGAAATAAGCACGACATTATGGGACGGAGGGAGTAATTCGTATTAAGTTTAGAATAATTCAAAGTTTCATATGTGGCTGGCCACACGTGTGGTCAGAGGTACTTATTTAGGGCTTACTCAATCGATCAAGGGTCACTTAATCGGTGTGGCCAGCCACATAAAACGCGCTGAAATATATTTTAATTTAGTAAAAATAATTTAAATTCAGTAAAAACAATTTTAGTTTAGTAAATATAATTTCAGTTTATTTAGAAAAAAAAATGGAGAATATATAAGAGGGCCT
miR167a-5p	TGAAGCTGCCAGCATGATCTA	CTATGTAuguaaaaacaaagucaaagGGTGTTTGTATGTTGcauauuuuuacauauuuucaAATGAATTTTAGTACTTTTATGATGATGTCTCCAACAAACATATTGTTGCTAGTTAGTACCATATAAATATAACTauacaauuaaauuauuauuauuuaaacuGATGagaucuaauuaaauuaaagagguGTTGATTAAATTTGTTTGTCAAGTACGTGGTTGAAATTATCCTCAAAAAAGGAACAAGTGAAGCTGCCAGCATGATCTATCTATGGTTAGCAAGTTAGTTTGTCATCAC
miR167c_1	TGAAGCTGCCAGCATGATCTC	guuauuauuaguaCTATATTTTATATACTATGATATATATCATTATATTTACATTTTCCCATAAACCTCTCTCCTTTGGCCCCTCTTTAAATACCCCATTGTTTCTTCACTTCTTTCTCTACCATTATATCCTATGTTcauuaaauaagcuuuguucucauuuuuuuuuucuauuuuuuuuccacuuauuauuauuuucuuaguuTCATTGGGAAATTATATTGTACATTGACGTGCACCACTAGTTGATGAAGCTGCCAGCATGATCTCAACTTgccuuuuauucugauuaaucTTTCA
miR319c_1	TTGGACTGAAGGGAGCTCCT	AAAAAGGCATGCAAGTAGTTCGGTAATAAATATCATTCTCTACATACGTACATACTCTAGTTAGCTAACCATTATATATAATTGGCTAACTACCTAGAGTATATTGACATTTCTTTATGAAATTCAAATTGTTTAATTTCTCTGCTTTTTGCCTTATGTTAGCucaauuuugaaagaaaaaugagaaaauugcAGAAATAGGGGTTCCTTGCAGCCCAAAGCAAGCGCGATAAACAAGTTTGTGTGGCTTTGGACTGAAGGGAGCTCCTAATTCTTCTGTTTTCCCTGGTCGTTTGGTTG
miR319e_1	TTTGGACTGAAGGGAGCTCCT	CAAAAAGGCATGCAAGTAGTTCGGTAATAAATATCATTCTCTACATACGTACATACTCTAGTTAGCTAACCATTATATATAATTGGCTAACTACCTAGAGTATATTGACATTTCTTTATGAAATTCAAATTGTTTAATTTCTCTGCTTTTTGCCTTATGTTAGCucaauuuugaaagaaaaaugagaaaauugcAGAAATAGGGGTTCCTTGCAGCCCAAAGCAAGCGCGATAAACAAGTTTGTGTGGCTTTGGACTGAAGGGAGCTCCTAATTCTTCTGTTTTCCCTGGTCGTTTGGTT
miR169d-5p_1	TAGCCAAGGATGACTTGCCT	ACATGAAGGTGAGAGTTCGATAATTGTTTGGTAGCCAAGGATGACTTGCCTGCTTTTTTATCTTTTTGGTTGAGATCGAGTTTTCTCGACCAAATCGTAGATGCCAGGCAGTCTCCTTGGCTATCTTGACAAGCTCTCATCTTTCATGCTAGGCTTTTCTCTTCATTTTACAAGCACGTACCACCTCGGAGCATTAAGGTAAGTCAAATCCTTTCTTTTCGAGAGAAATGCAATGCATATACGGAGTATATCACATTGATTAGCTGGATTCAAGACGGTTCAGACCATTAATAGGAGCTA
miR172d-5p_4	GCAGCACCATCAAGATTCAC	AGATGGATGATAACAGCCGTTGTTTGCCGATGCAGCACCATCAAGATTCACATGCCTAGCTTCCTTGACTTCCTTCACTAATTTTCTTGATTTTTGGGGTTTTATTTATTTAAAAAAAAAATGTGGTCACTAAACCCCAAAAATAGAAAAAAAATAAGTATAAGAATTTTTGTTGGAGGAGGTTAAGAAAGAAGTAAAGGATGTGAGAATCTTGATGATGCTGCAGCGGCAATAAATGGCTAATTACTGTTTTTTTTTATTACATCATTACATTTTTTTTTTCAAATGTAGGTATTCATT
miR172a_2	AGAATCTTGATGATGCTGCA	GGAGGAGGTTAAGAAAGAAGTAAAGGATGTGAGAATCTTGATGATGCTGCAGCGGCAATAAATGGCTAATTACTGTTTTTTTTTATTACATCATTACATTTTTTTTTTCAAATGTAGGTATTCATTTTTCCTGTTAATTTTCGTTTAATTTGTTATGTTTGTTTTATGTTTATTATATATAGATATAGATGTAAATGTATATTGAAACGGATGATTTAGGTTGTTGCTTCGTATGTAAGCGCACTCGATTTCGTTACATTATTTTTTTTTTTTTTTTAAATACAGGGATTTTTTTTTCCT
miR171b_2	TGATTGAGCCGTGCCAATATC	GGGTTCTCGTACAAGAGAACCTTGTGTATTTGATTGAGCCGTGCCAATATCCCGTGTAGTAATGAATATTGGTGGTGCGTAGAGCACATTAATTTTGTTGTATGCAGGATATGGGAGAGCAACACAACACTGCCTTTTTCATGTTCTCAACCACCGGTAAGTCATCTTTTATTGGAGTATGTTTCTTTTGGTTTTATTATTATTATTAATAAAATAATAAATAAAATAAATAGGTGGGAAGTAGAGTAGGTTATTAATGTTTATTCATCCCAAGTAAATGTGTCGTAGCTTTTCAATTAA
miR166d-5p_2	GGAATGTTGTCTGGCTCGAGG	TGGCATGGGTTGGAAGCAATTGAGTTGAGGGGAATGTTGTCTGGCTCGAGGACGACGAACACGAGAACCAGGACAAGGACTCGCCTTTTCACCGTCGTCGGACCAGGCTTCATTCCCCCTAATTTTATCTGCTTCCCTTACACCTCTTTTTCCTCCTTCCCAAATTTTCAGGTATTTTTTTTTTTTATTTTTCAATAGAGATTGTACGTGTTGCAGAGGTTTAGGTTGGCTGATTGGTGTAATGATGATAATTTTTGACCCTAACTCTAACTAGATTCTGTAAGTGTGCTCAGAATATAA
miR6300	GTCGTTGTAGTATAGTGG	TGGCCTAAGCTTTCTCTTTGAAAGACGTTTAAAGTCGTTGTAGTATAGTGGTAAGTATTCCCGCCTGTCACGCGGGTGACCCGGGTTCGATCCCCGGCAACGGCGACATTTTGACGAGGGTTGAAACTAGGTCGTCATGTAGTTTTACCTAAGTCAAACTAAATAAGTAAATTCTTTACAAACCTTATACGAGTATAGAGGCAAGCTAAGGGTCGAACCCAAAGGGAATGAATCAAAACCATGTTATAGTCTAACGTCAAGCTATTTCGAAGAGTTGTTAATGGTTGTATATGATAACTA
miR166	TCGGACCAGGCTTCATTCCCCC	cucuuuuuauuauucauuuCAAATATTCTCATATTCATATACAGAAGAGAATGAATGTAGCATATCTTATCTTCTGAAGGATCGGAAGATGATCTATCTAAGGTGGTTGTTATGTTGAGGGGAATGCTGTCTGGCTCGTCGACACCAATCCATTACTCATTCCGGTCATACATATATGTAACATGAATATTATCATTGTTGCATAATAATCTAAATGGAACGTATGAGATAGATGATAGATTTCGTGTGTCGGACCAGGCTTCATTCCCCCCAACTATAAGTTcguuuuuuccuuuucuc
miR403-3p_1	TTAGATTCACGCACAAACTCG	aaaauuagauuuugcCGACTTATAATCAATTAAACAGGGAACATCATAACCGGGGAAATCAGAAAATAGGGTTTGTATAACGCAAGCcgcaaaaaacacaaaauuuucuuucuccucccaAATTCCAGAATCGTGGTCAGCGAAACAGAGGAATCATATTTCAGGTTTGTCCGTGAATCTGACATTTCAATACCTTCTTCATGCTTCTCATTTCAGAGAACTTGATCTCTTTAAGGGTTTTGTTTATTGTTAGATTCACGCACAAACTCGCAATTTGTCTCCTCTTTCTTTTATCTTGTT
miR172b-5p_3	GCAGCACCATCAAGATTCACA	GCAGCACCATCAAGATTCACATGCCTAGCTTCCTTGACTTCCTTCAcuaauuuucuugauuuuugggguuuuauuuauuuuuuuuaaaaaauguggucACTAAACcccaaaaauagaaaaaauaaguauAAGAATTTTTGTTGGAGGAGGTTAAGAAAGAAGTAAAGGATGTGAGAATCTTGATGATGCTGCAGCGGCAATAAATGGCTaauuacuguuuuuuuuuuuuauuauuacauaauuacauuuuuauuuucaaauaaaCGTAGGTAATCATTTTTCCTGTTAATTTTCGTTTAA
miR172d-5p	CAGCACCATCAAGATTCACA	CAGCACCATCAAGATTCACATGCCTAGCTTCCTTGACTTCCTTCAcuaauuuucuugauuuuugggguuuuauuuauuuuuuuuaaaaaauguggucACTAAACcccaaaaauagaaaaaauaaguauAAGAATTTTTGTTGGAGGAGGTTAAGAAAGAAGTAAAGGATGTGAGAATCTTGATGATGCTGCAGCGGCAATAAATGGCTaauuacuguuuuuuuuuuuuauuauuacauaauuacauuuuuauuuucaaauaaaCGTAGGTAATCATTTTTCCTGTTAATTTTCGTTTAAT
miR166-3p	ATTTCGGACCAGGCTTCATTCCCC	uuuaaaaaaagagaACCTATTCTTACATATAAAGGGAGGATGGACTTCACACCTTTAATTTACAACTTGAAAAATATTGATAGATTATAATGCATGAAGCAAATAGTAGACCTTATTCTCATTCCCATTCTCATTCCATTTCTCTCTCACACTCAAACTCAAACTCAAACTTTTCCTTATTGTGAATCATGGTTGAGGGGAATGCTGTCTGGCTCGAAGTCTTTCGGTTATTGATTCTTAATATGAATGATTTCGGACCAGGCTTCATTCCCCTCAACATACACATGTAGGTTAATCTTC
miR160a-5p	TGCCTGGCTCCCTGTATGCCA	GAAGTAACGTCGTGTAAGGTCAGTATAATATGCCTGGCTCCCTGTATGCCATCTGCAAGTTCCACCCTGGATAGGGTGGCCTTTTCATATGGCGTACAGGGAGCCAAGCATGTCGGAACTCTATCCTTTTGAAATTCCCCCACCCCTTCTTAGTTGTGATCTCTCTTATTTCAGTTATTTCTACAGTGATAACGTGGTAAATTCACCTGCATGATGCAATTGGCTATTGAATTTAAATCTGTTTCTCTACCTGTATGATATGTTTGGTATTGTGCTAAGCTCGTATTGTCTCAGGGATAA
miR160	TGGCATACAGGGAGCCAGGCA	TTATCCCTGAGACAATACGAGCTTAGCACAATACCAAACATATCATACAGGTAGAGAAACAGATTTAAATTCAATAGCCAATTGCATCATGCAGGTGAATTTACCACGTTATCACTGTagaaauaacugaaauaagagAGATCACAACTAAGAAGGGGTGGGGGAATTTCAAAAGGATAGAGTTCCGACATGCTTGGCTCCCTGTACGCCATATGAAAAGGCCACCCTATCCAGGGTGGAACTTGCAGATGGCATACAGGGAGCCAGGCATATTATACTGACCTTACACGACGTTACTTC
miR160g	TGCCTGGCTCCCTGTATGCCATC	AGTAACGTCGTGTAAGGTCAGTATAATATGCCTGGCTCCCTGTATGCCATCTGCAAGTTCCACCCTGGATAGGGTGGCCTTTTCATATGGCGTACAGGGAGCCAAGCATGTCGGAACTCTATCCTTTTGAAATTCCCCCACCCCTTCTTAGTTGTGATCTCTCTTATTTCAGTTATTTCTACAGTGATAACGTGGTAAATTCACCTGCATGATGCAATTGGCTATTGAATTTAAATCTGTTTCTCTACCTGTATGATATGTTTGGTATTGTGCTAAGCTCGTATTGTCTCAGGGATAACG
miR398b	TGTGTTCTCAGGTCGCCCCTG	CCAGATTTCCCAGTTGCACTATAAAATCAATACCCAAATTCTCAGCTATAATCACCAGCAACTTTTAATCACACTATCACAAGATAAATTAAGAAGTTCGAGTTATGACTTGCAACAGGTGGCGAAGTCCTACAGGAGCGATATGAGAACACATGAATGAGGCATTCTGCACCTTTCCAAACCAGATCACCAATATATGGGTGATTTGGATTCACGTTTCTTGGGGAGGTTGCTATCCTGTGCTGCTCATGTGTTCTCAGGTCGCCCCTGCCGGCCTTCTTCCACCAGACAATTACTACA
miR166k	TCGGACCAGGCTTCATTCCT	AGGCCTCGGACCAGGCTTCATTCCCCTCAAATATGATATGAAAACTATCCATTGTAATTTTTTTTATGAATTTTTGGAGGTGTATTATTCATATTATCAAAGGGTTTGGTTGAGGGGTATGTTGTCTGGTTCGAGATCATGGAGGTTGATGAATTTTATTATTTTTTTCTTCTGATTCTTTTAGATTTTTGCAAATTATGTATTGGTTTTTTTCCATATGTAATTAGCATAAAATTAAAAAGGAGGAAAATATATATAAAAGAAAAACCCTACATGATTCTCGGACCAGGCTTCATTCCT
miR167d_1	TGAAGCTGCCAGCATGATCT	CGTTTTTCCGTCTTCGTGCCTTAGTAGCAGTTGAAGCTGCCAGCATGATCTGAACTTTCTCTCCTTCCTTTCTCCTCTTTCTCTCTTTAATTTTTTCTCTATTCTCCTTGTTTTCTTTCTGTTCCGTTTTCGCTGTCCGAGAAAGATTAGATCATGTGGTAGCTTCACCTGTTGACGAGAGCACGCTCGAATAAAGGAAAATTATTCATCCCATCAAAGTTATCAACATATATCTTGGTGATACATATAAATTTCATCTTAAGGTATGTGTTATGTCTATTTCTTAAATTCTTAATCATA
miR159a-5p_5	GAGCTCCTTGAAGTCCAAAAG	TTGAAGTTAAGGCGGAGTTGGGTAAAAGTAGAGCTCCTTGAAGTCCAAAAGAAGGCCTAACTAGGGCATAATACTGCTGTTGATATATGGTTATCCATAGTCCTATCCATTTCTTTTAATTGATGATAGGCCTTTGGTTTTGCATATCTCAGGAGCTGTCATTTGCCCTTTTTCAGGTTTGGTCATTTTTTGGATTGAAGGGAGCTCTACATCCCCCTACTTTCTTTCTCTCTCTAAACTTGTCTTAATCTTTTTTTTTTTTTTATTTAAAAAAAAATCATTTTATTAGTAATTTATTTG
miR166h-3p_1	TCTCGGACCAGGCTTCATTCC	TAGGCCTCGGACCAGGCTTCATTCCCCTCAAATATGATATGAAAACTATCCATTGTAATTTTTTTTATGAATTTTTGGAGGTGTATTATTCATATTATCAAAGGGTTTGGTTGAGGGGTATGTTGTCTGGTTCGAGATCATGGAGGTTGATGAATTTTATTATTTTTTTCTTCTGATTCTTTTAGATTTTTGCAAATTATGTATTGGTTTTTTTCCATATGTAATTAGCATAAAATTAAAAAGGAGGAAAATATATATAAAAGAAAAACCCTACATGATTCTCGGACCAGGCTTCATTCC
miR408-3p_2	ATGCACTGCCTCTTCCCTGGC	AAAAAAAAAACACTTAAGTATTTTATTTTTTCGTATTGAGACACAAAGTGCGGGATCTGATCCTAAGTTTTGGGTATTATTCTTGTTAAAAAAATTATTCTGTCTTACATTTGTAAGCATAAGTGTGAACGCAAAAGGCGAATTCATCACATTGATGATAAGGTGGTCGTTTTTACAAGTTTTGTGTCTATTTCTTATGGGAGAGCTAGAAGCTAGGGAAGCGGTTGGGCATGAGATGGATCAATCAACATTGTAGATATTGATGTTGTTGCTCTTCCCATGCACTGCCTCTTCCCTGGC
miR159a_1	TTTGGATTGAAGGGAGCTCTA	CATTTCTTCCTACAAATAAACAAAAAACTTTTATTGTAAGATGATACAAAGCAAATCTTATTATGATAATAATCTCGCGTTCGTGTTCGTGTTGAAGTTAAGGCGGAGTTGGGTAAAAGTAGAGCTCCTTGAAGTCCAAAAGAAGGCCTAACTAGGGCATAATACTGCTGTTGATATATGGTTATCCATAGTCCTATCCATTTCTTTTAATTGATGATAGGCCTTTGGTTTTGCATATCTCAGGAGCTGTCATTTGCCCTTTTTCAGGTTTGGTCATTTTTTGGATTGAAGGGAGCTCTA
miR167a_2	TGAAGCTGCCAGCATGATCTGA	TTTTTCCGTCTTCGTGCCTTAGTAGCAGTTGAAGCTGCCAGCATGATCTGAACTTTCTCTCCTTCCTTTCTCCTCTTTCTCTCTTTAATTTTTTCTCTATTCTCCTTGTTTTCTTTCTGTTCCGTTTTCGCTGTCCGAGAAAGATTAGATCATGTGGTAGCTTCACCTGTTGACGAGAGCACGCTCGAATAAAGGAAAATTATTCATCCCATCAAAGTTATCAACATATATCTTGGTGATACATATAAATTTCATCTTAAGGTATGTGTTATGTCTATTTCTTAAATTCTTAATCATATG
miR166h-3p	TCGGACCAGGCTTCATTCCC	TTCTCTGTTTCACTCCACAAACCCCCATAAAAATCCCACAAACTTTCTTGTTTTCTGATTCCAAAACCAAATCATCATCTTAATCTCTcuuaauuucucaaaaaaaaaaaaaaaaaaaaaaaaaugaaggaagcTCGATTCTTGAGGGGAATGACGTCTCGGCTCGAAGGCTACCAATTTACAAucaaauuucuucaauuuuauaaaaaauuucuucaaauuuucaugTAATTTGTGTCAATTTTGCCTTCGGACCAGGCTTCATTCCCCTTAATTTGAGCTTCCAAATCCucaaauuua
miR5368	GGACAGTCTCAGGTAGACA	AACGATCTGGGCACTGTCTCGGAGAGAGGCTCGGTGAAATAGACATGTCTGTGAAGATGCGGACTACCTGCACCTGGACAGAAAGACCCTATAAAGTTTTACTGTTCCCTGGGATTGGCTTTGGGCCTTTCCTGCGCAGCTTAGGTGGAAGGCGAAGAAGGCCCCCTTCCGGGGGGGCCCGAGCCATTAGTGAGATACCACTCTGGAAGAGCTAGAATTCTAACCTTGTGTCAGGACCTACGGGCCAAGGGACAGTCTCAGGTAGACAGTTTCTATGGGGCGTAGGCCTCCCAAAAGGTA
miR8051-5p	TAGTATGGTAGAAAGATTCA	GTCTTACACGAAAAAAGACTAATCTAATTGATAGTATGGTAGAAAGATTCATATGAATCTTTCTACCATACTATCAGCTCTCATCGAATATTGCTGATTCGCTCCTGCTCGTTTCAGTTAAGAAATGCAATTGGAATCCGTCAAAGAACTACGAAATCAAGTTTCATTCAAATTAATCATTCTGGCTAACCGTTTTTACATAGATAATAAGTAAAAAAGCAGTAGGAACTAGAATGAATAGTGCAGTTTCAATAAATGCGAGAATATTTACTTCCATAATCTTATCGTTTTTTTACGTAC
miR156k	TGACAGAAGAGAGAGAGCACA	ACGGATATCTGACGATTGGGATGAATACCTTGACAGAAGAGAGAGAGCACATCCTGAGTTATCAGGTGAAACCTTTAGGCCGCCTCTCCTACTTCCGGTTGGAGCAACGTCATTCAGAAGTGGCTGATATATTGTTTCTTGGTTATTTTGGAAGTACAAATCAGGCTGCTGAGACATTGTAGGCCAATTTACAGTATGCATTTGGGGGCAGGAATACTGCAGCATTCCATCTGCTACATTTTGAATATAATACGAAATCTTAATTATTAAAATGAAGTCCTGAGATAATTAATATATAAT
miR169_2	AAGCCAAGGATGAGTTGCCTG	ATACAAGCAAGAATAATATGAAGTTCTTAAAAGCCAAGGATGAGTTGCCTGGTCACGATGTGTTAGTTGCTCCTTCCAATTTCACCGGACCACGGGAGCTTGATGCTGGTTCGGGTTGTTTATAAACCCTCCATTGTGTTGCATGGCTCCACCTGTATGTGAAGAAGAGATGCCTAAGAATCCACCGTCTTGTTGCTGGTAAAAAGAATTGCCATTGGTGGAGATGCTTGAGGTACCTGTTGCCATGCATTGTGATTGATGGGATTCAAACACCATGTTATTATATGCATTCGAGCCAGA
miR166g-3p	TCGGACCAGGCTTCATTCCTC	CAATAGAATATATTTTuacggaaauuuuuuuuuuugaggaaaacaCAAATGTTAATAATGAAGATTTTGATGAAAGAAGCTATCTAGGAAGTTGGCTTGTAAGGAATGAAGTCAGATCCAAGATCTCCTTCTATTTTTCTACTTATTATCATTTTTCCACCATTTTTATTACAAAGTTTTGuaauauauacuuuuuuuuuuauauauuugguGAGATTAATTAGTAGGGAGAAGTGTATGTTAATGATCTCGGACCAGGCTTCATTCCTCACATTAACCAATCTTCCGTTTATGCATGCT
miR390.1	TAAAGCTCAGGAGGGATAGCG	ATATCTTTCAAGAAAGTATGGAAGAATCTGTAAAGCTCAGGAGGGATAGCGCCATTAAGATTGAATTACTTTTTATTATACTTTATCCGTTTCAAATTACTTGAAAGTGTGTATCATTCAAACTTCTACGGAGTATAAAAATCATGAAAGTATTAAATTAAAAAAAAAATAATAGTGGCGCTATCTATCCTGAGTTTCACGGGTTCTTCTTACTATGAAACACTGTATTCATTCTTTTCTCTCACGGGTACGATATCTCTTTTAGCACGAGTTTAACTTGGTATGCATGCTTAATTACAC
miR172e-3p_1	GAATCTTGATGATGCTGCAT	TAATTAATTAATTAATTGTAAGATTATATGAGAATCTTGATGATGCTGCATCAGCAGATACTTGACTCAATATCATCATGTTTGTGCTCAAATTTCCATTCATCTGAAACGAGTATTCGTACTCGTTTCGAGTTAATTATGAATCGGAGATCTCCAAGGTAATATCAACGGAGTACTAATCAATCATTCTTGTTAAATTTTGCTAAATCTAGCACTTTTTTTAGGTCATATATATGTTAAATTTAGGTTAATTAGTGGTGTGAAGGTAGTGATTTTAATTTCAAAATCTTTTTATTTTAA
miR390e	AGCTCAGGAGGGATAGCGCC	ATCTTTCAAGAAAGTATGGAAGAATCTGTAAAGCTCAGGAGGGATAGCGCCATTAAGATTGAATTACTTTTTATTATACTTTATCCGTTTCAAATTACTTGAAAGTGTGTATCATTCAAACTTCTACGGAGTATAAAAATCATGAAAGTATTAAATTAAAAAAAAAATAATAGTGGCGCTATCTATCCTGAGTTTCACGGGTTCTTCTTACTATGAAACACTGTATTCATTCTTTTCTCTCACGGGTACGATATCTCTTTTAGCACGAGTTTAACTTGGTATGCATGCTTAATTACACTC
miR156h_1	TGACAGAAGAAAGAGAGCAC	TGTGCACCGTTTTTCTTCTCTACCATGACGAATCAATTGATTTATTGTAGGCATCGTTCTTTCCTTGACACTAAAAGTTGTGGTATCTTATAGACCTAACATAGATCACATCCCTCACGACATAAGATTGAAAAATCCAAACCTTCCTGGTTGGCTTCCTACTACCTACTGGGATAGGAACTACTCGGATAAGAAGAGTTCAAAGTAAGATAATTGGATCTCTCTCCTCAACTCTGGGCTAGCAGACTGCTTGTTGTTTACTGTAGGAATAGAAAAGACATGACAGAAGAAAGAGAGCAC
miR845d	TGGCTCTGATACCAATTGATG	GAAGTCATGGTCACACCCAAGCCCAGACCGTGGCTCTGATACCAATTGATGCGGAAACAAAATCTGGGTTAGGTGATATTTGGTAAGGATCAAGTGTTTAGGCTAGGGGTTAAGGGCTTGGTGTTTTAATATGTACTTCGGTTTAGTATTTAGCAGCTCCTAGCCCACGTGTATGAACTAGGTTAGGGATAGTTATGGCTAGAGTTGAACACTAACTCTACTAGCCACTAAAACAAGCTCACTCCGAGTAAAGCTTACAAACTCGAGTCCACGAGTTCAAGTCAACTTAAGTCCACAAGT
miR169f.1	TAGCCAAGGATGACTTGCCTA	uuauuugaagaaaauaaacuuuTACTGCATTTTTGATAAAGATAAGGATAAAGTGTTGATTTTGTGAGGAGCCAGTGauuauuugaaauuuuauaGTAGGGTGCTATATAAGCGATCCTCATAAGGCCATAAGTCAATAACCCCAAAACATTTCATTAATGTGAGTAGGTTTCTAAGTTACTAATGGAAGAgaauaagaagaaagaagaagagagguCTTACATGATGAAAAGAGCCTCGTTTATTTACTAGCCAAGGATGACTTGCCTAGCCTTATGCCCTTATAGAGGGTGTACCTAC
miR169h_2	TAGCCAAGGATGACTTGCCTG	TAGCCAAGGATGACTTGCCTGATATTGCATGCTAAGTTAAGCTAGACTGTGGTTCAATCAAGTTGAAGGCATACACCAAGCAAGTCATCTATGGCTTGCTGATAAGCTCTTATCTTTCATGCTAGGCCTCGCTATTCTCATCTGTATGAACAAGTAAAGATCGAGGTAAAAAAAATccagauuuuuuauuuuuauuuauuauuauuauuuuuuuuuuaucaaaauagaaTTAAAAAGTACCTACATATGTATTACAATACAATTTAATTccuuuauuauuaaaaaaaaaaaauacuauuu
miR156c_1	TGACAGAAGAGAGGGAGCA	TGACAGAAGAGAGGGAGCAACTGAGGTTAATTTAATCAGATAATTAGCTTATCTGATCTGAAATTGTTTGTAAGATGAATTGccguuauuauuguuauucccGGAGTAGGATATCTGAGCTTGATCCCCTGTCCTTAATTGTAGGTTTGACCCTTTACTCTGGCTTGAACTCGACCCGCCTTCTCCCTGAGATTCTGATGCGCTCTTACGACGCCTCTCGTTGTGCCCTGCTAGACGCCTCCGGCAGCTCCTCTTTGTGTCATCGAACTCAGATAGCTCATGAAACCTGGATGTTAGATG
miR397-5p_1	ATTGAGTGCAGCGTTGATGA	GGTGGTTGGCAATTGAAAAAAAGAGTTGTTGATTGAGTGCAGCGTTGATGATCCGGAGAAGAAATGTTTCACCAGCTCTAACCGGGAATATTGTTGTATCTGCATCATAATCGAGGCTGTCATCAGTAAAAAAATATGCTCCTATCCAGCACCAGATCACTTAAACTGTATGACTGTAAGTATTCATGCCTTTTCTGACAAGGGAATATCGTCGTACCTTGACTAGAGCAGCGGTAGAGATCACCAGGTTGACCATTAATAGTGTATGCATCAGACACATTTGGAGCAGCTCCTGTAAGC
miR172a_3	AGAATCTTGATGATGCTGCAT	ACAAAATTGTACCCCTAATACuugaucaaacccuaaauuuuccuuuauuuauugcCCTTTTTTTTCCAACCTTTACTTTACTCATAAGATGCTTCAATTCAAAAGCTTCACCCTTCTTCAGTTCTTCCTCAATATAATCTCTCTATAATTTCATAGTTGGTGTTTGCAGATGCAGCATCATCAAGATTCACAAATAAcccuuuucuuaauuaguugauaaauuaauuaauuaauugguaAGATTATATGAGAATCTTGATGATGCTGCATCAGCCGATACTTGACTCACTATCATCATTT
miR172c-3p	AGAATCTTGATGATGCTGC	ACAAAATTGTACCCCTAATACuugaucaaacccuaaauuuuccuuuauuuauugcCCTTTTTTTTCCAACCTTTACTTTACTCATAAGATGCTTCAATTCAAAAGCTTCACCCTTCTTCAGTTCTTCCTCAATATAATCTCTCTATAATTTCATAGTTGGTGTTTGCAGATGCAGCATCATCAAGATTCACAAATAAcccuuuucuuaauuaguugauaaauuaauuaauuaauugguaAGATTATATGAGAATCTTGATGATGCTGCATCAGCCGATACTTGACTCACTATCATCATTT
miR172b-5p	GCAGCATCATCAAGATTCACA	GCAGCATCATCAAGATTCACAAATAAcccuuuucuuaauuaguugauaaauuaauuaauuaauugguaAGATTATATGAGAATCTTGATGATGCTGCATCAGCCGATACTTGACTCACTATCATCATTTTAATTTTGTACTCTAATTTCCATCCATCCGAAACGAGTACGAATACTCGTTTCGAGTTAATTATGAATCGGAGACCTCCAAGGTAATATATGTCTCAATACTCATATCAACGGAGTTATTACTAATCAATCTTTGGTATAAAATTTTGCTATATCTAGTATTTTTACTTTG
miR172k	TGAATCTTGATGATGCTGCAT	TTATCAACTAATTAAGAAAAGGGTTATTTGTGAATCTTGATGATGCTGCATCTGCAAACACCAACTATGAAATTATAGAGAGATTATATTGAGGAAGAACTGAAGAAGGGTGAAGCTTTTGAATTGAAGCATCTTATGAGTAAAGTAAAGGTTGGAAAAAAAAGGGCAATAAATAAAGGAAAATTTAGGGTTTGATCAAGTATTAGGGGTACAATTTTGTAAAATGAGCACCACCAAATTTAAAGCTGCCAACCCCACCATGCCACTATATTTCATTGAAGGTTTGGACGAAGGGTAATT
miR172d_2	TGAGAATCTTGATGATGCTGCAT	TTACAAAATTGTACCCCTAATACuugaucaaacccuaaauuuuccuuuauuuauugcCCTTTTTTTTCCAACCTTTACTTTACTCATAAGATGCTTCAATTCAAAAGCTTCACCCTTCTTCAGTTCTTCCTCAATATAATCTCTCTATAATTTCATAGTTGGTGTTTGCAGATGCAGCATCATCAAGATTCACAAATAAcccuuuucuuaauuaguugauaaauuaauuaauuaauugguaAGATTATATGAGAATCTTGATGATGCTGCATCAGCCGATACTTGACTCACTATCATCAT
miR390a-5p	AAGCTCAGGAGGGATAGCGCC	ATCTTTCAAGAAAGTATAGAAGAATCTGTAAAGCTCAGGAGGGATAGCGCCATTAGGATTTTATAACTTTTTATTATACTTTTTCCGTTTCAAATTACTCGAAAGTTTTATAAATAGATGATATGCAAAGTGTATCGTTTAAACTTACGAAGTATGAAAAATGGAAAAATCATGAAGGTATTAAATTAAAAAAAAAGCAGTGGCGCTATCTATCCTGAGTTTCACGGGTTCTTCTTACTATGAAACACTGTATTCATTCTTTTCTTTCACGGGTACGACATCTCTTTTAGCACGAGCTTA
miR166u	TCTCGGACCAGGCTTCATTC	TTGGTTTTCCATGGTCTTGCTCTAGACCCACATCATGAGAAAAACATTGAGTTTGTTCACACGTATAAAAGAGAACCAACGAACCCATGAATTTAATATCATCACACTTATTATATTGCATGGCCAAGCCAGAATAACTTCTAACCCTTTCTTCTTCTTCTTCGTCATTCTAACCTTCTACCTAGCTATCTCAGCTCCTCTTCGATCCCTCGAAATTTAACACTTAGTTAGTTGAGGGGAATGCTGTCTGGTTCGAGACGATTCATTCGTACATGAAGGATCTCGGACCAGGCTTCATTC
miR166g-5p_3	GAATGCTGTCTGGTTCGAGAC	CTCGAAATTTAACACTTAGTTAGTTGAGGGGAATGCTGTCTGGTTCGAGACGATTCATTCGTACATGAAGGATCTCGGACCAGGCTTCATTCCCCCCAACAACATATCACAATTCACAACCATATTTGTGTGTATGTCATTGATTGATCATATCATCAACTTTTTAATGGATGGTACGTCTTGTGATTCTCTTACTACCTCAATTCCTACATTTTCTTTATCTTATGAATTTGAGTATTATGGTTGAATAATTGATCAGATTCATTACATATGGTGAAATGTACAATATCAATGTTAATT
miR164e-5p	TGGAGAAGCAGGGCACGTGCAA	GTGATATTTTTTGGTGAGTAGCTCCTTGTTGGAGAAGCAGGGCACGTGCAAATGTAGCGTACCGTTCGCGGTGGTTGCACGTGCTCCCCTTCTCCACCATGGGCTTCTCACCTTCTTTAGTTCCTCCTGCGGACTTTGACCTTGAAAACTCCTCTCCGTCCTCCATACTTGAACTTCTTCATCGATCCGTTGTAAAACTAAGTTCTCATTTCTTGTTTCTTTTTCCTGTTTGTGTTATTTTCTCTACTTTTAAATATTCTGTTTTTGACTTTTTGATATTACATTACTTCATGTACATTA
miR164b	TGGAGAAGCAGGGCACGTGC	ATGTGATATTTTTTGGTGAGTAGCTCCTTGTTGGAGAAGCAGGGCACGTGCAAATGTAGCGTACCGTTCGCGGTGGTTGCACGTGCTCCCCTTCTCCACCATGGGCTTCTCACCTTCTTTAGTTCCTCCTGCGGACTTTGACCTTGAAAACTCCTCTCCGTCCTCCATACTTGAACTTCTTCATCGATCCGTTGTAAAACTAAGTTCTCATTTCTTGTTTCTTTTTCCTGTTTGTGTTATTTTCTCTACTTTTAAATATTCTGTTTTTGACTTTTTGATATTACATTACTTCATGTACAT
miR164a_2	TGGAGAAGCAGGGCACTTGCT	TGGAGAAGCAGGGCACTTGCTGGTATGAATTACTCGTATCTGCATTTACTTGAGTTTGGTTAAAGGTGATGTAGGAGTCCATTAATGGTGGTAGGCCGGATGATGAGCTTGTATCTTCCATGGAGTTGCTCTCGTTATCAGCACCACCTTTCAAACCTATTTCTGATCTGTTCTTGTAGAAAACCCTACAAAGGACCCAATCTTCTTGCTTCATGTCAATGGAAAAACTATATGAGTTAGCATATAATGTGAATCAAACTCTAGAATATTTCGAATAATAGTTTACCTTTAAAAATACAA
miR395b-3p	AAGTGTTTGGGGGAACTC	TAGAAAGGAAGCTTTTCTCTACTGAAGTGTTTGGGGGAACTCTAGGCGGTACTTGACAATGTAAGGTGGCATTTTGATTTTTGAGGCAGAGCATCTTTTCTGTTGTACTATTAAGCAACTTTCAAAGATTTACCATGAAGCTTTGCCTTAAAAAATGCTGTGCATTGAAATGCATTTGGTATTCTCAAACAAAGGATGTCAGGTGTCCTCAGGAGTTCCCTCGGAACACTTCAATGGAGATACATAGAATATGGCTTCTCGAAATGAAGCTTTTCTCTACTGAAGTGTTTGGGGGAACTC
miR395g	TTGAAGTGTTTGGGGGAACTC	ATATCTGACCTTTTTACTTAGCTTAGTGTATATGATTTTCTCTTTTacaacaaauuaaauuuuaCCATCTTAAAATGTTGCTATAAATAATTGAATTGGAGGCTCTTGCATCTATAACAAATTATTAATCTAGGTTTCATCAATTAATGGAGTTCGTAAATGTCTATTATCACTTGTATCCTAGAGTTCCCTCCAAACACTTCTTAAGGGTAACGGATTGAGCTATAGTCAGTAGCAATTTTGCCCTAATTGAAGTGTTTGGGGGAACTCTAGGATTCACTTGATTTATTTGAATGATCT
miR395a_1	CTGAAGTGTTTGGGGGAACTCC	GGTCGGATTATACTGGCAATTAACTCTTACTGAAGTGTTTGGGGGAACTCCCAGGTTCATTTGATGCATGTAAGATTACATTGTCTATCATTAATTCATTATCTTCGTCTTATCATTATAATTATATACGATTATACGAAGTATATTATTTGAGCACGCAAAGGACTTGTTTTAATTTGTGTGTGTAACGCAATGTATTAATGCTTGATAAACCTTCGGCTAGTTTTGCAGTAGAGATGATTGACATGGAAGATGGATCATATATATATCAGATGTAACGAGTTAACGAAAGCCCCTTCA
miR156c	TTGACAGAAGAGAGAGAGCAC	GTTCTGGGTCGCATGAACTCCAAGAACTTGTTGACAGAAGAGAGAGAGCACGGAAATCTTGAGCTGCAGCCAAGTTGGATGGTGCCACAGAGACTGGTAAACCTACAGATTATTAGTCATTTCCAAGCACTTGGTTAGATAATATGTTTAGGACAGTAACAAACAGTATGAAGTAAAAATTTATTATGCAAGTCAGTTGCTCTACAATGAAAAAAGAAAACAGATATTTATTATTACTCGAAGATGTTAAGCCTCTATATTTAATCATATTTTTGTCTTAGATGGAGCTCTCCTGTATCC
miR169v_1	CAGCCAAGGATGACTTGCC	CAGCCAAGGATGACTTGCCGGAAGTTTTATTAATAATGTTGCAACTTTTTAAATTAAGTAGugauuauauuuaauuaauuacuuccCGGCAGGTTGTCCTTGGCTACATTTGGTTCTCTTCTTCTCATGCCAACCTATATAGACATTTTCAAGATCCAGGCTTATGCATGTATTGGTGTTTGGAACTCGTCTATATCCATGTGTCATCATTTGTATCTTTGCTATATTGTGGCACAAATCATGAAAGGAAACGGAAAATACAGGTAAACTGTgaaacaauaaucaagaauauuTGCTTAG
miR169b-5p	CAGCCAAGGATGACTTGCCGG	CAGCCAAGGATGACTTGCCGGAAGTTTTATTAATAATGTTGCAACTTTTTAAATTAAGTAGugauuauauuuaauuaauuacuuccCGGCAGGTTGTCCTTGGCTACATTTGGTTCTCTTCTTCTCATGCCAACCTATATAGACATTTTCAAGATCCAGGCTTATGCATGTATTGGTGTTTGGAACTCGTCTATATCCATGTGTCATCATTTGTATCTTTGCTATATTGTGGCACAAATCATGAAAGGAAACGGAAAATACAGGTAAACTGTgaaacaauaaucaagaauauuTGCTTAG
miR169c-3p_3	GGCAGGTTGTCCTTGGCTAC	ATACATTAGTACAATGCTAAATTCATAACATCACACAAAAAATTATGAATGTAAATGTGTTCTTAAGGCGGAGTTTGATGATATACTACTACGTATATAATATGGTTTATATAGGAGTATAATTATTATACTATGGCATGAAGAAGTATAGAGAGTGAAATGCAGCCAAGGATGACTTGCCGGAAGTTTTATTAATAATGTTGCAACTTTTTAAATTAAGTAGugauuauauuuaauuaauuacuuccCGGCAGGTTGTCCTTGGCTACATTTGGTTCTCTTCTTCTCATGCCAACCTAT
miR156f	TTGACAGAAGAGAGAGAGCACA	GGAAAATCCTAGTGTTTTCGCGAAACCCTGCATGGCCTGTGTGGAAACCTCCAATGTTTGGAGCATTAGTATTAGAACTGCTAGAGAGTGAAGCTGAACTCTCAATATCGTCCAAACCCTGAGAGCAAGGAAGTTGATAGCTGTTATTTAGATGCAAAGAAGTACTGCTACCTTGAGCTGTTGCTGAACTCATAACCGTTGGTTGCATAACAGGTCCCACACGGATATCTGACGATTGGGATGAATACCTTGACAGAAGAGAGAGAGCACATCCTGAGTTATCAGGTGAAACCCTTAGGC
miR5141	AGACCCGACGCGACTGACAGATAA	GACTCCCGCAGACTTGTTTCATAGCTTTCAACTGAGCGGCAGACCCGACGCGACTGACAGATAAAGCCGACATAATGATCAGTGCCTCTGGCCCCCTTGTTCCTTTCTCCTTGACGTTATTTTCCTCGTTTTTATTACAATAAGGTAGCTTGCATCAAAAGAGGGTGCAACTAAGGCCGAGTCCAGCAAGAAGAGTGCTGACCAGGCGGCAGCTGCTGATACTGAACTGCCCCCTTCTTAAGCTTTAAGTATTTTTTCTTTTCACGGCCTGCGTGCCGTTTGCTTTGTAATTACCCGGCC
miR169g	TAGCCAAGGATGACTTGCCTGC	TAGCCAAGGATGACTTGCCTGCTTCTTTTTGCGAAGGTTTATTATCTAATTATTACGGTTCTGTTCTCTTCATCTCATCTTTTACTACauauuaaagauuuuuuuugaugaauuuuaauuauuuuuucuuaacucaauuuuacaaaauuuuauuuauuuguugaaauuuuuuugccAAAGCAGTCGTTauauuuuugaacuuuuuuuuuaaacaaauuaaauuuuugaacuuuuuuuuuuugacgguuTTTGAACTTAATTAAGGTATTACCGTATGTTATAAACTTTTGCTTAATTAAA
miR169r-3p	GGCAAGTTGTCCTTGGCTACA	ATAATTATTTTAACCTATGGTTTTTATGTCGGCAAGTTGTCCTTGGCTACATTGGGTTCTCATCTTCTCATGTTTGCTCTAAATTGGTTCGATACTATCTTATTAATTCATCTACCTCACAATAATGCATGTGTTCAACTTCATAGTTGGTTTTTTTCATGCTATATGTTTGATTATCGATCAGGTGATCGATCGATAATCGATCCATAATTAGTGAGTAATAAGGTTTAGCTAATTATTAGCTAGAGATCCGATCTGAGCAAATTGTCAAGCCAGGTAAGTATGCAAATAATGCAACCT
miR160h_1	TGCCTGGCTCCCTGCATGCCA	TGCCTGGCTCCCTGCATGCCAGCAGGAGAATTGTCGGGTAAACATCCGAAAGGGTTATTTGGCCCTAGGAAGTTTCCGGGAAATGAGGGGACCGGAAGTTGGCCATCCATGGGAAAATCTGGATGGTGAGGAAGTCTGAATTTCTTCCTTGGAGGGGAGAAGGGGGACAGATGAATGGCTGGCATATTAGATACTAATTCCACCAGCCACGGACTAACGCGTTTCACATTTTGCAGCAAATCTGGTTCATCCCATGTTACCTAAAACGGGTAGATCTAATTTGTCAGAGAATACTATAGA
miR164a_4	TGGAGAAGCAGGGCACGTGCA	GTCTATTCACCCTCAAAATACACAAATTCCTTCAcuuuuuuccucuuucuuuugcuaTAAATTGGGTCACuaacacaucaaaacaacaaauuaGTGTCTCAATATTTAGTTTCTCuucucuuugauuuuuuuucuuagcTTCCTTCACTTTTCTCTCTuacucucuucuuucucuuaaTCAAATATGGAAGACTTTACATGGTATGGTGATGAAAGGTTTAAAGAAAAAGGTCATGGTGTTGAGCAAGATGGAGAAGCAGGGCACGTGCATTACTAACTCATGCGATTTGATACATATAT
miR393a_1	ATCCAAAGGGATCGCATTGATC	ATCCAAAGGGATCGCATTGATCCCAACuuacaauuuaauuuuuaauuuuaugguuTCGTTTGGATCATGCAATCTCTTTGGATTTATCCTTCCGTAgcuuaauuauuauuucauucAATTCCTTCATCAAATTAAACCAAAACCGAACGAAGAAGTTCTCTAGAACTTGAACCAATCTCGGGCTTCTCTACGTAAGGTAATCCCCCCACTTTTTTGGTATGTCTTGGTTATAACAAGGTTGTATACAACAAGTTTAATCATCAGAATTTATATTTATGCAAAAGTTATTATTAATCTTTA
miR393a	TCCAAAGGGATCGCATTGATC	TCCAAAGGGATCGCATTGATCCCAACuuacaauuuaauuuuuaauuuuaugguuTCGTTTGGATCATGCAATCTCTTTGGATTTATCCTTCCGTAgcuuaauuauuauuucauucAATTCCTTCATCAAATTAAACCAAAACCGAACGAAGAAGTTCTCTAGAACTTGAACCAATCTCGGGCTTCTCTACGTAAGGTAATCCCCCCACTTTTTTGGTATGTCTTGGTTATAACAAGGTTGTATACAACAAGTTTAATCATCAGAATTTATATTTATGCAAAAGTTATTATTAATCTTTAT
miR393a-5p	TCCAAAGGGATCGCATTGATCC	ACCCATGAGCTTAGATTATACAGAATGAAAACAGTAGGACTATATCATTTTTAAGTGCGTTGGAgcccuuuuuauuuuaauauauuuauuuauacaauuauauguacauauauauauaaguagaCCCTTATATGTTATAACTCCTCTCATTCTTATGCCAcaauaaagagagagagagagagagugagagaaagaaagaagugGTGTTTTGTGGGGTTAGTTGTGTTTCTGCAGCAGCTGAAGGAGGAATCCAAAGGGATCGCATTGATCCCAACuuacaauuuaauuuuuaauuuuaug
miR166h-5p	GGAATGTTGGCTGGCTCGAGG	ATTCTAGAGAGAGAAACTACATTTTTGAGGGGAATGTTGGCTGGCTCGAGGCTTTATAATCTCATCATCGTCTAGGCCTCGGACCAGGCTTCATTCCCCTCAAATATGATATGAAAACTATATATTATAAATTTTTTATATTGTTTTTCTTGGAGGTTTATTATTCATTATCAAAGGGTTTGGTTGAGGGGTATGTTGTCTGGTTCGAGATCATGGAGGTTGATGAATTTTATTATTTTCTTCTTCTGATTTTTAAGATTTTTGCAAATTATGTATTGGTTGTTTTTCCATATGTAATTA
miR168a-5p	TCGCTTGGTGCAGGTCGGGAA	GGCGAAGAGAGATTTGCGGCAGCCTCTGATTCGCTTGGTGCAGGTCGGGAACTGGTCAAAATAAATGTTCCGCCGCCGTAGCAGCCGCCGCGTAATCAGTGGCGTGAGTTTAATTGTTTCTGCTTAGCCGGTGGTATTCCGGATCCCGCCTTGCATCAACTGAATCGGAGTTTGTTGTGAATTACTTACTCGTTTTTTTATCAGATCGGATGAGTTTGGATTTGGTAGTTCATTTTGAGCTGGTTATTGATTCATTTCTGTGTTTTTTTTTTTATTGATTTATTGTTAGAGTGTGTTGTT
miR168-5p	TCGCTTGGTGCAGGTCGGGAAC	GCGAAGAGAGATTTGCGGCAGCCTCTGATTCGCTTGGTGCAGGTCGGGAACTGGTCAAAATAAATGTTCCGCCGCCGTAGCAGCCGCCGCGTAATCAGTGGCGTGAGTTTAATTGTTTCTGCTTAGCCGGTGGTATTCCGGATCCCGCCTTGCATCAACTGAATCGGAGTTTGTTGTGAATTACTTACTCGTTTTTTTATCAGATCGGATGAGTTTGGATTTGGTAGTTCATTTTGAGCTGGTTATTGATTCATTTCTGTGTTTTTTTTTTTATTGATTTATTGTTAGAGTGTGTTGTTG
miR168a-3p	CCCGCCTTGCATCAACTGAAT	TGTTTCTGCTTAGCCGGTGGTATTCCGGATCCCGCCTTGCATCAACTGAATCGGAGTTTGTTGTGAATTACTTACTCGTTTTTTTATCAGATCGGATGAGTTTGGATTTGGTAGTTCATTTTGAGCTGGTTATTGATTCATTTCTGTGTTTTTTTTTTTATTGATTTATTGTTAGAGTGTGTTGTTGGATTGATTTTGATTGCTTTTTGGTTGATTTGTTTGTTTATGTCAGTTTTTGAGATTTGAATTTGTTAGGAAGAGTTTGGATTTGTGGAAATGTGATTTGGTGATTAAATTTGT
miR168_1	ATTCAGTTGATGCAAGGCGGGATC	acaaauuuaaucacCAAATCACATTTCCACAAATCCAAACTCTTCCTAACAAATTCAAATCTCAAAAACTGACATAAACAaacaaaucaaccaaaaagcaaucaaaaucaauccaacaacacacucuaacaauaaaucaauaaaaaaaaaaacacagaaauGAATCAATAACCAGCTCAAAATGAACTACCAAATCCAAACTCATCCGATCTGATAAAAAAACGAGTAAGTAATTCACAACAAACTCCGATTCAGTTGATGCAAGGCGGGATCCGGAATACCACCGGCTAAGCAGAAACA
miR168-3p	TCCCGCCTTGCATCAACTGAAT	TGTTTCTGCTTAGCCGGTGGTATTCCGGATCCCGCCTTGCATCAACTGAATCGGAGTTTGTTGTGAATTACTTACTCGTTTTTTTATCAGATCGGATGAGTTTGGATTTGGTAGTTCATTTTGAGCTGGTTATTGATTCATTTCTGTGTTTTTTTTTTTATTGATTTATTGTTAGAGTGTGTTGTTGGATTGATTTTGATTGCTTTTTGGTTGATTTGTTTGTTTATGTCAGTTTTTGAGATTTGAATTTGTTAGGAAGAGTTTGGATTTGTGGAAATGTGATTTGGTGATTAAATTTGT
miR394a_1	TTGGCATTCTGTCCACCTCC	TTGGCATTCTGTCCACCTCCTATAGAAAAGGGGGACTCTTGTATAACTTGGGAGGTGGGCATCCTGCCAATAGAGCTCTGTTTGGCTTTCCTTTGTAAAAccuucuugaucuuucuuccuuATTTTGCTGCTTTGATTTCTCTCAACTAGGuaucuuuuuucuuaauuuuuauuuuuaauuauaaauuugauGTCAAAAGTATAACTGTTGGACTTTTATTTACTGTTGTGTTAATCCAACTCCACTAGTTTAGTGGTTGACTTTTTATTTCAAGTTTGGTTTCTTGTGAAATATCAGAT
miR169e_3	AGCCAAGGATGACTTGCCGG	TACCCTAATTATATAACCTTGCTAATGAAACTCAACAAATTACCCTCTTTTCACGCCCTAACAAACTCTTCACCCATATCTCTTTGCTCCTTCTTCTTAGGTATCCTTTCCAuuuauauauagcaacauacATTCCATTTTTAGAAGAATGTCACACAAACTTCTAGCTAAATTAAATAAGCTAGCTAGCTAGTAGCTATCTTGTATCATCAAATGTCTTGCATGTTTTTACAAAGGTAAAGTTAATGCAGCCAAGGATGACTTGCCGGCCGGCATGCCACCGGCCGGCTAGTCTTCCTC
miR396a-3p	GTTCAAGAAAGCTGTGGGAAA	AAGCTTAGCTACCTCATTCTTCTTACATTCACTCCTTGGCACCTTGCTTGGCTTGCTCGAGCGGCGAAAATAAAAGTAAGTCCTGTCATGCTTTTCCACATCTTTCTTGAACTTTCCTCCTCTCCCCCGCTCATCTGTTCGTCTGTTAGTTATGCATCTCCTCTAACGTGGAATGGTACGGCGGTTGAGGAGATCACTATGGCGAACTAAATGGCAATTCGAGATTGAATTGAATTTTCTCCGTGGAAAGTTCAAGAAAGCTGTGGGAAAATATGGCGTGGATTTTTATTAGGACTTTGC
miR319_1	TTGGACTGAAGGGAGCTCC	GTAGTTCGGTAATAAATATCATTCTCTACATACGTACATACTCTAGTTAGCTAaccauuauauauauaauuggcTAGCTACCTAGTATATATTGACATCTATATGACTTTCAAATuguuuaauuucucucucucucucucuuuuuuuuuuccuuauuaugTTAGTTCAAuugaaagaaaaaugagaaaauugcAGAAATAGGGGTTCCTTGCAGCCCAAAGCAAGCGCGATAAACAAGTTTGTGTGGCTTTGGACTGAAGGGAGCTCCTAATTCTTCTGTTTTCCCTTGTTGTCTGGTTG
miR396a-3p_5	TTCAATAAAGCTGTGGGAAG	TTTATTTTCAGCTATTTATACCCTTTCTTCCTACCCCCCTTAACCTACGCCTCTCTCTTCACTCTTCTTTTCTTTCTTTCTCTCTCCTCTTTTTTTTTCTAGGGCTTTCTTTTTCATATAGCCTCTTTCATCATATCTCTATGATTATATCAAAACCATATTATATACACCCTTTTCTCGTATAATATATGGTTCTATTTTTATTTTTCCACAGCTTTCTTGAACTGCATCTCTATTTTTCATGATTTTCGGTATAATTCTAGAAAATTCTGGGTTGCGGTTCAATAAAGCTGTGGGAAG
miR396c_1	TTCAAGAAAGCTGTGGGAAAA	AGCTTAGCTACCTCATTCTTCTTACATTCACTCCTTGGCACCTTGCTTGGCTTGCTCGAGCGGCGAAAATAAAAGTAAGTCCTGTCATGCTTTTCCACATCTTTCTTGAACTTTCCTCCTCTCCCCCGCTCATCTGTTCGTCTGTTAGTTATGCATCTCCTCTAACGTGGAATGGTACGGCGGTTGAGGAGATCACTATGGCGAACTAAATGGCAATTCGAGATTGAATTGAATTTTCTCCGTGGAAAGTTCAAGAAAGCTGTGGGAAAATATGGCGTGGATTTTTATTAGGACTTTGCT
miR396h	TCCACAGCTTTCTTGAACTG	CTCGTATAATATATGGTTCTATTTTTATTTTTCCACAGCTTTCTTGAACTGCATCTCTATTTTTCATGATTTTCGGTATAATTCTAGAAAATTCTGGGTTGCGGTTCAATAAAGCTGTGGGAAGATACAAATAGAATCACCCAATAATTCTCCAAGAATTTTTATATATTTGATGGTATGTTGTTCAAGATCCATCCTTTATTATTTGCTGATGATATGGGTTTTTTTAGATCTAATTTTGTTAATTATTATCACGGATTTTATCTTTTCAGGGTTGGATTTATAAATTTATTGTTTTGA
miR396a-5p	TTCCACAGCTTTCTTGAACTG	CTCGTATAATATATGGTTCTATTTTTATTTTTCCACAGCTTTCTTGAACTGCATCTCTATTTTTCATGATTTTCGGTATAATTCTAGAAAATTCTGGGTTGCGGTTCAATAAAGCTGTGGGAAGATACAAATAGAATCACCCAATAATTCTCCAAGAATTTTTATATATTTGATGGTATGTTGTTCAAGATCCATCCTTTATTATTTGCTGATGATATGGGTTTTTTTAGATCTAATTTTGTTAATTATTATCACGGATTTTATCTTTTCAGGGTTGGATTTATAAATTTATTGTTTTGA
miR396a-3p_4	GTTCAATAAAGCTGTGGGAA	CTTTATTTTCAGCTATTTATACCCTTTCTTCCTACCCCCCTTAACCTACGCCTCTCTCTTCACTCTTCTTTTCTTTCTTTCTCTCTCCTCTTTTTTTTTCTAGGGCTTTCTTTTTCATATAGCCTCTTTCATCATATCTCTATGATTATATCAAAACCATATTATATACACCCTTTTCTCGTATAATATATGGTTCTATTTTTATTTTTCCACAGCTTTCTTGAACTGCATCTCTATTTTTCATGATTTTCGGTATAATTCTAGAAAATTCTGGGTTGCGGTTCAATAAAGCTGTGGGAA
miR167d-5p	TGAAGCTGCCAGCATGATCTG	TGAAGCTGCCAGCATGATCTGAACTTTCTCTCCCTCTTTTCcccuauuucuuuuuuuuuuuauuuuucucuauucuccuuguuuuuuuuucuucuguuucguucuccuugucgagaaagATTAGATCATGTGGTAGCTTCACCTGTTGACGAGAGCACGCucgaaaaaaggaaaauauuuCAATCCGTCAAAGTTATCAACATATGTTTTGGTGATACATATATATTTCATCTCAAGGTATGTGTTATGCCTATTATTTCTTaaucauaugauauauauuTGTGTGCTATGTTATATGTG
miR169a-3p_3	GGCAAGTTGTCCTTGGCTAC	CTAAGCCCTATAAATACTACTTGGTTTGCAATGAACATATGAAAAAATTGTGGATCGGAAACACATATGAAAAGCTCTTACTTCAAGCATGCATGCAAATTGTAAAGAAGCATGCATGTGATATGGCCGCCATGTAGAGCATGCATGAAGAGGTAAAAGGTCACAATGCAGCCAAGGATGACTTGCCGGAcuauauuauauacauauauaugcaTGTTATAATTGATTTTAACCTATGGTTTTTATGTCGGCAAGTTGTCCTTGGCTACATTGGGTTCTCATCTTCTCATGTTTGCTCTA
miR156g_1	ACAGAAGATAGAGAGCACAG	GGGTACCCTCTCTTTCAAGGGCTACACAATTCCATCTTTCCATCTCTCTTCTCucacaauuuuuuuguuuuuugacguCCCCCTCTCCAAguaauuauauaauaaaauacuGTGTTGATAAATAAAAGCACGGATTCTTGTAGTGTACAGTCGTAGTCGTAAATTAAGTGGTTATTAATTAAGCACATATATATGTGATGGGTAGTAGGGTAAAAGAGTGGGAGCAAAAAGTGGTGGGGGAAGTTGTTGACAGAAGATAGAGAGCACAGAGGATGAAGTGCATGGGGATATTTGGATTTG
miR166e	GGACCAGGCTTCATTCCCC	CCGCTTGCTTACTCATTCTCATTCTCTcauccuuuucuuucuucucuccuuuguuuuuuuucucucuccuucccccTTCAACTAAGCCGTTTTTCTTGGGGGTGCTCTTCAGATCACTCATCACGCACCCTATAAATCCAAATTCATAAAACCAAATTCATTCAACCAATTGGCCCTGGGTTGGAAGCAATTGAGTTGAGGGGAATGTTGTCTGGCTCGAGGACGAGGACCCGCCTTTTCACCGTCGTCGGACCAGGCTTCATTCCCCCTAATTTTATCTGCTTCCCTTACACCTCTTTT
miR166m_2	CGGACCAGGCTTCATTCCCC	TCCGCTTGCTTACTCATTCTCATTCTCTcauccuuuucuuucuucucuccuuuguuuuuuuucucucuccuucccccTTCAACTAAGCCGTTTTTCTTGGGGGTGCTCTTCAGATCACTCATCACGCACCCTATAAATCCAAATTCATAAAACCAAATTCATTCAACCAATTGGCCCTGGGTTGGAAGCAATTGAGTTGAGGGGAATGTTGTCTGGCTCGAGGACGAGGACCCGCCTTTTCACCGTCGTCGGACCAGGCTTCATTCCCCCTAATTTTATCTGCTTCCCTTACACCTCTTT
miR172c_2	AGAATCTTGATGATGCTGCAG	GAGGAGGTTAAGAAAGAAGTAAAGGATGTGAGAATCTTGATGATGCTGCAGCGGCAATAAATGGCTAATTACTGTTTTTTTTATTACATCATTACATTTTTTTTTTCAAATGTAGGTATTCATTTTTCCTGTTAATTTTCGTTTAATTTGTTATGTTTGTTTTATGTTTATTATATATAGATATAGATGTAAATGTATATTGAAACGGATGATTTAGGTTGTTGCTTCGTATGTAAGCGCACTCGATTTCGTTACATTATTTTTTTTTTTTTTTAAATACAGGGATTTTTTTTTTCCTTT
miR399a_6	TGCCAAAGGAGAATTGCCCTG	ACAGACAATGCAACTGCATAAAATCGGTTGTGCCAAAGGAGAATTGCCCTGCTATTCATCAGCATTGTTATTTCGACCCCTCTACCTATATGAAAATTTGAAGCAATTTATATATATTTTTTTTTATTACTTCTCTTATGTTTATATTTCTTGTTCCTTTTGACAGGCATCTCTAATATAATTTGCAGTATTCGTACATGAAGCAAGTAATCCTGACAAAAGTTTTTACAAGGAATTACAGATTTGCAACTGCAGCTTTCGAGTTAAGCAATTCCCTTGGAGCAAGAGATGAATATCTGG
miR160a-5p_1	GCCTGGCTCCCTGTATGCCAT	TGTAGGATGTCAATATTCATTTACGCCTATGCCTGGCTCCCTGTATGCCATACACAGAGTCCATCGGATTATCGATGGCCTCCATGGATGGCGTAAGAGGAGCCAAGCATACTCCTTTTAATTTTACATTCCATTTTAATTAATTGACTTGCTCATTTTTATTCGTTTATTATTCTAATTATTTTTGATATAATCTTGATTTTATTACAACTAGTATATATATTTTTTTATATGATTTGATTTCCTAACTATTCTTCTGGGAAATTAACTCTATTTTTTGGTCCGTCAACAGGTTGGAAA
miR160b_1	TGCCTGGCTCCCTGTATGCC	TTTGTAGGATGTCAATATTCATTTACGCCTATGCCTGGCTCCCTGTATGCCATACACAGAGTCCATCGGATTATCGATGGCCTCCATGGATGGCGTAAGAGGAGCCAAGCATACTCCTTTTAATTTTACATTCCATTTTAATTAATTGACTTGCTCATTTTTATTCGTTTATTATTCTAATTATTTTTGATATAATCTTGATTTTATTACAACTAGTATATATATTTTTTTATATGATTTGATTTCCTAACTATTCTTCTGGGAAATTAACTCTATTTTTTGGTCCGTCAACAGGTTGGA
miR166a-3p	TCGGACCAGGCTTCATTCCCC	GGTTTTCCATGGTCTTGCTCTAGACCCACATCATGAGAAAAACATTGAGCTTGTTCACACGTATAAAAGAGAACCAACCAACGAACCTATGAAATTAATATCATCATCACACTTATGTTGCATGGCCAGGCCAGAATAACTTCTAATCCTTCCTTCTTCTTCGTCATTCTAAGCTTCTAGCTAGCTATCTCAGCTCCTCTTCCCCTCGAAATTTTACAGTTAGTTGAGGGGAATGCTGTCTGGCTCGAGACCATTCATTCATATGGTATATGAAGGATCTCGGACCAGGCTTCATTCCCC
miR827a	TTAGATGACCATCAACAAACA	TCAAGACTACTTGATAGTTTGAATTGATGCAGGAAGGAATTATTCCTTAGAATATGCTTTTGTTTTTTCCTATGTTAGCTTACCAATAACCATATATACAGACTCATAACTCATGCTAAAAGGCCATTTTCTTTTCTCTGTTATATTGTCTGAAACCTTGTATTATGCAAATGGCGAATTACTTTTTTTCGCAGGAGATGAATATGTTTTGTTTATGGTCCTCTAACCATGAAGTCATTTTCTATATATGTTGGGTATATTAGAATATGGTTAAAGTGATTAGATGACCATCAACAAACA
miR166e-3p	CTCGGACCAGGCTTCATTCCC	TGGTTTTCCATGGTCTTGCTCTAGACCCACATCATGAGAAAAACATTGAGCTTGTTCACACGTATAAAAGAGAACCAACCAACGAACCTATGAAATTAATATCATCATCACACTTATGTTGCATGGCCAGGCCAGAATAACTTCTAATCCTTCCTTCTTCTTCGTCATTCTAAGCTTCTAGCTAGCTATCTCAGCTCCTCTTCCCCTCGAAATTTTACAGTTAGTTGAGGGGAATGCTGTCTGGCTCGAGACCATTCATTCATATGGTATATGAAGGATCTCGGACCAGGCTTCATTCCC
miR6173	AGCCGTAAACGATGGATACT	AGCGAATGGGATTAGATACCCCAGTAGTCCTAGCCGTAAACGATGGATACTAGGCGCTGTGCGTATCGACCCGTGCAGTGTTGTAGCTAACGCGTTAAGTATCCCGCCTGGGGAGTACGTTCGCAAGAATGAAACTCAAAGGAATTGACGGGGGCCCGCACAAGCGGTGGAGCATGTGGTTTAATTCGATGCAAAGCGAAGAACCTTACCAGGGCTTGACATGCCGCGAATCCTCTTGAAAGAGAGGGGTGCCTTCGGGAACGCGGACACAGGTGGTGCATGGCTGTCGTCAGCTCGTGC

## Sheet: predicted novel_miRNA
miRNA id	Chromosome	Strand	Sequence(mature)	Sequence(precursor)
novel_mir1	NW_018742204.1	-	TCCGTCTATGTGTTGGTTGTGTTAGTTCA	CAAATTTGAGATGGTTTAGTGTTATAGAGGTGATTGCATGATTATTGGATTGTTTGTAAGGTGATTGTTGTACTGTGTTGGTATCGTGCAATTCTCGTTTTGGTCAATAAAAAACTGTTGAAAAATTTGGACTAAAAATCGCACAACGTAATGTGATTAACTAGATTATGTATATTTGCCATACAATGGTGTGCGTCTATCCGTCTATGTGTTGGTTGTGTTAGTTCAATTTCTAATGGCTGATGTAATTAGTATTGTGCATTAATCTATGCTCAAATTTT
novel_mir2	NW_018742204.1	+	GGTCGAAAGCAGGTCTCCACG	TGGTAAGTGTCCAAGTGGTCGAAAGCAGGTCTCCACGTGGATGGTGTTATGGGCCGATTTGAGTATTTATCC
novel_mir3	NW_018742204.1	+	TTGGCCACATCGTGTGACC	GTTTTATATGGTTGGCCACATCGTGTGACCTGACCGACCAAGTAACCCATGACCGAATAATCCCTAACCGATTGAGTAACCCTTAAATAAGTAACCCCGACCATACGATGTTGCTAGCCTCATAGAAA
novel_mir4	NW_018742205.1	+	ACTTATTAGATACCAAAGTCA	TAGTAGGTAAAACTTATTAGATACCAAAGTCAGAGTCGAGGGTATTTAATAAGTTTTTCTACTT
novel_mir5	NW_018742206.1	+	TGCAACGATTAGACATTTT	CTCTTTGTATCTATTTAAGTGCATCAGTTTGACTTTTATATTACTACCTCCGTTACATGTTATGTGCAACGATTAGACATTTTCCCTCTCTACTTTATGTCAAATCTATGTCAAATTGTTGCACATAACCTGTAACGGAGGTAGTATTTACATTCTAACTTTGACTTATTATTATATAAAGAA
novel_mir6	NW_018742309.1	+	TAGGGCTGCGCTGTACACATCGACACT	AGCTGTTGGCGGTGGATAGGGCTGCGCTGTACACATCGACACTTGGTGTGTGGGATCACGGCGGCGTTAAGATCGCAGCCGTCTTGCAGCG
novel_mir7	NW_018742316.1	+	GGCCCCCAAGGGCATGTGTCGTAGG	AAGCCAGTGGCGCGAAGCTACCGTGTGCTGGATTATGACTGAACGCCTCTAAGTCAGAATCCGGGCCAGAAGCGACGCATGCGCCCGCCGCCCGATTGCCGTCCTACAGTAGGGGCTTCGGCCCCCAAGGGCATGTGTCGTAGGCTA
novel_mir8	NW_018742358.1	-	AAGATTTGACTTGGTGCCACGTAA	TGGGGTAATTTAGATAGGGTGATGCTAAATGTTGCAAGTTGCAACAAAATATATTCGCTACAATCTTACGTGGCACTTGTTTATTGGTGCCACATAAGATTTGACTTGGTGCCACGTAAGATTTGACTCATCGTATTTATTTACTGCT
novel_mir9	NW_018742390.1	+	TTCTGAGGAATGATGGACCGCTACCTGGTA	ATGGGATTTCTGAGGAATGATGGACCGCTACCTGGTACAGGTCGCGTGTCGCCCAATACCAATGCGGGTTGTCCATCAAGAATTTCTTCCTAAACTTGGTGATGTTCTTGGACTTGCCCGGTGTAGGTGCGTGACCTTTATGCTCTAGCTCGACTTTATCAATTACCCAATCACCAC
novel_mir10	NW_018742418.1	-	TGTCAGTGGACGGATAACAGGCCGGT	TGCTGGCCTGCCCAGTCCAAGTTGCGAGTTGATCCATGGGGCTTCGGCGAAAGTCAGAGCTTCATGGATCCTAAAGCGGAGGGGACCGCGTGAGGCTGGTTTCACAGAGCAACGAAAACTTCCCGCTCTTGTCAGTGGACGGATAACAGGCCGGTG
novel_mir11	NW_018742418.1	-	TGTGTGGTCGGAACACTTCGTGGTGCAGT	CGACCTCAATCATTTTTGGATTCGTTCGCATAGAAAACTTCTGACTGTAGTCCCCAGAATGCCATCAAGGACTAGTATGGTTAATCATGATTCAAGAATGGTAATGGCTACCCAACTTTTCGCAGTTGGGTTAGGATGATTAATCATATTTGTGTGGTCGGAACACTTCGTGGTGCAGTGGTTAGAGGTTGTCTCGCATCCTTGAAATATGAGGTCA
novel_mir12	NW_018742484.1	-	GTCATGACTAATTTTAATTGACATCT	TGGGTCGGGTTCGGTTGAATTGGTTCAGGTTGGGTTTCATTTTATAGTTTGAGTTGTGTTAAATTACTATGTTTATACACATTTAAATTTGAATCGAATTTGGATTGGATTAGATTGGGTCATGACTAATTTTAATTGACATCTCTGTGAAATATAGTCTTGACTCTTGAGCCGACTTG
novel_mir13	NW_018742556.1	-	TGGATAGGTTGTGGATTTGA	CGGGTATGAGTATGATGTCGTATATTTTTATGGATCTACACCGAATCCATTTGATTGAAGCGGGAATGAATATGACAAAGAAAGGTATGAATATTAAAAGTCATACCCGTTATAAACAGTGGATAGGTTGTGGATTTGAAATCATACTTACCTCATATCCA
novel_mir14	NW_018742556.1	+	CCAAGACCTCATTAATTGAAGTATT	GCATTACTCGGAAGTAATTTTTATTTCATGCAAATGAGCCAGAAAGACAATACAAATTACATATAAAAGAATGGAAGTGGACTCAAACTTGTAATCTATCATATCGTATACAAGCTCTCAATCTTTGTCACTAGGCCAAGACCTCATTAATTGAAGTATTAGTATTTTATGATATACTTTCGAGTAGTGA
novel_mir15	NW_018742577.1	+	GAGACGATTCATGAAGGGAAGGAGAGTAAA	GGGAAATTAGCACTCCCTTTTACTTGAAGTTGAGTGTTGTTACATCTTTCATTTGCTTCTTGATATTGCTGGTCGAGACGATTCATGAAGGGAAGGAGAGTAAAGTGGTGTGGCAAAAGAGGGATTATTTTGGTTGGTTTTACTACCCTTCTTTTGTAGTAAAAACAACCAAAATAACTCTTCTTTTGCCACACCACTTTACTCTCCTTCCCTTCATGAATCGTCTCGAGTAGCAACATCAACAAGCAAATGAAAGATGTAACAACACTCAACTTCAAGTAAAAAGGGAGTGCTGATTTCCA
novel_mir16	NW_018742597.1	+	AGTGCTTGGATGACTATTTTGCTTACC	AGTTTATTATTTTGAGTGCTTGGATGACTATTTTGCTTACCGAGTTTGTCTTGTTTGTCATCATAAAAAAGGGGGAATATTGTTGACCCTCTTAATATTTTGATGATTGACAAAATAGACAAACTTTGACTAATGATGTTTGATAGTCTTGGTAGAACGAAAAGATTCAGGTGTTAACAAACTGTTCCGGAGTAGGAGCAAAGGAATTGGAAGTCTTGATATTCATATGCAAGCTTTCAAGAAGAAGAGCA
novel_mir17	NW_018742597.1	+	TCTGCTCTGCTCTGCTTCAATC	TGTGTGATGTGGTTGCCGATGTTGAAAGGGGTTGATACTCCGACTTTAAACCTTCCCTCGCTCATTACCTTGAGTTACAAGGAGTTGGTGCTACCTACACTTTTTAATGATGATGATGTGCCTTTATTATTCACATCTCCGTATGTGGATGATTGTATATGTGTATGTACTTAGGCCCTGTTCTTTAGAGTTGCTGAATCCTGCTCTGCTAAGTCCTGCTTTACTCTGCTCTGCTCTGCTTCAATCTGCTCTGCTCTGCCCTGCCCTGTCCTGCTCTGCTCTGCTTTGCCCTACTCTACT
novel_mir18	NW_018742616.1	-	ATTTTTTTTGGAGATTGGAT	TGCTATTCATGGAGATTCCGTAAATATTCCGGTATTTTTTTTGGAGATTGGATGCAGTTACTAATTCATGATCTGGCATGTACAGAATGAAAACTTCATTCTCGATTCTACGAGAATTTTTATGAAAGCC
novel_mir19	NW_018742733.1	+	TAATGTTGCTACTCAAGACGATTCATGAAG	TGTACTAAATGTTGTAAGTGAAGTATGTTGCGCTATATTTACTCAATAGAAATACAGTTGGAGAAATCAGCACTCCCTTTTACTTGAAGTTGAGTGTTGTTACATCTTGCATTTGCCTGTTAATGTTGCTACTCAAGACGATTCATGAAGAGAAGGAGAGTAAAGTGGTGTGACAAAAGAGGGATTATTTTGGTTGTTTTAACTACAAAAGAACCAAAATAATCCCTCTTTTGCCACACCACTTTACTCTCCTTCCCTTCATGAATCGTCTCGACTAGCAACATCAACAAGCAAAGGCAAGATGTAACAACACTCAATTTTAAGTAAAGGGAGTGCTAATTTCCCCAATTGTATATCTCTTGAGTAAATATAGCGTAGCATACTTCACTTACAACATTT…
novel_mir20	NW_018742733.1	+	TGATGTTGCTAATCGAGACGATTCATGAAG	TTACTAAATGTTGTAAGTGAAGTATGTTGCGCTATATTTACTCAAGTGAAATACAGTTGTAGAAATCAGCACTCCCTTTTACTTGAAGTTGAGTGTTGTTACATCTTGCATTTGCTTGTTGATGTTGCTAATCGAGACGATTCATGAAGGGAAGGAGAGTAAAGTGGTGTGGCAAAAAAAGAGTTATCTGGGTTGGTTTTCATGAAGGAAAAAAGAGTAAAGTGCGTGGTGTGGCAAAAAAAGAGCTATCTTGGTGTGGTGTGGCAAAAAAAGAGTTATCTGGGCTGGCCAAAAAAAACCAACCCAGATAACTCTTTTTTTGCCACACCACTTTACTCTCCTTCCCTTCATGAATCGTCTAGACTAGCAACATCAACAAGCAAATACAAGATGTAACAA…
novel_mir21	NW_018742770.1	+	GTGAATAAATCAACAACTTTTTCATTAT	GGGTATTTTCGTGAATAAATCAACAACTTTTTCATTATTATGAGCTCCACTAGTTTATTTACGAAAATGCCA
novel_mir22	NW_018742770.1	-	GGCTTATAAAATTAAGCGGAGTATGTGGAC	TGGATAAACTACATGGGAGGCAATGCCCCACGCGCCTCTGTTCTTGTTTGCTTTTTTGGGGCTTATAAAATTAAGCGGAGTATGTGGACTGCTTATCGTGTGTTGTGTTATGTCTG
novel_mir23	NW_018742810.1	+	AAAGATCTAGCACTGTGGTACGTCTCTC	CGATCGTTGAAAAGATCTAGCACTGTGGTACGTCTCTCGCACACATCGCTGGAATATACAACCTTTTCGGAGAGACGATCT
novel_mir24	NW_018742815.1	+	TTCCACAGCTTTCTTGAACTGCA	GTTCTATTTTTATTTTTCCACAGCTTTCTTGAACTGCATCTCTATTTTTCATGATATTTTTCATGATTTCGGTAATTCTTGTAAAAAACAAAATGTGAAAATTCTGGGTTGCGGTTCAATAAAGCTGTGGGAAGATACAAATAGAAT
novel_mir25	NW_018742907.1	+	CTTGACACCGTGAATCTTATGTCGTGTGG	ACCTCCACCTCCATCAACAAATTTATCAGCTTTTATATCGACTGGAATTGCCAAGCTTAGAAATTTTTCACATACAACCACACTAGATATTTTTTTTAAAGAGGGAAAATATTTAAGTTGACCTTTAACCTTTTTCCAAGGTAATCCCTTGTGTTTAGCTAAATAATAGCAAAAATACAATTTTCTATACCCCTTAACCATTTCCTCAACTTTATCATCAACATAGAAAGTTTCTCTAGTGTGTTTAGAAACTAAATCATTTCCTAATCGAATGAAAAATTTCCTTAATCTCACTGACTCACAAAGCATAAGAATCAAAGTTTGAATTGAGGTTTTTTTTATTAGTCATTCTTTGTAAAAAGATATCTTCAATGGAGTTTAAAAACTGATATATTCCAA…
novel_mir26	NW_018742907.1	+	AGTGGGCTAGGTACTTTGAGA	GCCTTACTTGCAAGTTTTTTTTTTTTTTTTTATTGGTAAGGAGAAGGGTTTTATACTTTTATCAGATCAGAACCTTTCACTTGTCCAAATTAGTGGGCTAGGTACTTTGAGAATGGGGGGAAGGGTAGGAGAATCCCCATCCCAAAGTGCCTCTAGTGACTAAGCTTTGATTCCTTGCATATTAAGGA
novel_mir27	NW_018742933.1	-	TGTGGGGAGAGTACTTCAG	GCTCTCAGGAGTCTCCGTTATTTTGCAGGTACAGGCGTCCGGTTCCAGTCTCGGAATTGTAACTCTCCCGCAGGACATCAGAAAACCCCGAAACATTTGGCGCCGTCTGTGGGGAGAGTACTTCAGAGATGGCATCCAAGTCTGTACCGACTCCTGAAGAGA
novel_mir28	NW_018742969.1	-	GAATTCACGCCACAACATCTTTCTTTGGAT	CTTTCAAAGGCAACGAATAACGGAATGAATAATGTAATTGTTGATCAAAAGGAAGATGATGTGGCATGACTTCGTCACTGCTTTTGAAAACAAACGTATCGGCGATACAATGAGCACCTCGCTTGCGCCGGAATTAACGAATTCACGCCACAACATCTTTCTTTGGATCAAACAATTACATTATTCATTTTGTTATTTGTAGCCTTTGAAAC
novel_mir29	NW_018743021.1	-	TTTGTACCGACTATTATGTTCTTGTA	AACAAGTAACGTGTGGGTTACACAGGGTTTTGGTGAAAATGAACCTCTAATTTATTGGCCAAGCTTAAGAAAATTGCAATTTGATTTTCCAATTGAAGGCAATGAGATCTTGGCTTAGTGGTTAAGATTGAGGTTATGTATATCACTTTGAAACATTTTTAGTCTTATCTAATTTTGTTGATATCATTTAGTATAGTTTAGATCATGCTCAATGATGGTACACCTCTAAGTCTCTACACCTACAATCTCCAATCAAAATAAAGAGTTTCATCAACACCTACTTTGTACCGACTATTATGTTCTTGTA
novel_mir30	NW_018743066.1	-	TGTGTATTTGATTGAGCCGTG	ATGCATGGGATATTGGTACGATTCAATCAGAAAACCGGGTTCTCGTACAAGAGAACCTTGTGTATTTGATTGAGCCGTGCCAATATCCCGTGTAG
novel_mir31	NW_018743175.1	-	TCCTGCAACAATAGTTAAGA	GTGGATGATCCTTCAACTGATTCTGTGGTTTCATGGAGTTGTAATGGTAACAGTTTTGTTGTTTGGAATGTTCCTGAGTCCTAATCTGTGCACAAATGAATTGGTTCATTTGGCTGTTGGTGCAATGGCAATTTGTTGTGCACTTGGTAGGGACTAGGAAGGACCACATATTTGATTCCTGCAACAATAGTTAAGAGAGGATTGTAATCTAA
novel_mir32	NW_018743199.1	-	GTATAGATTAGTATAGATATATCACA	AACTAGTGTGTAGTCCAAGCGTTGCACCAGTTGATACTTTAATTAGACCTTGTGATTATCATAGTTTATGATTGGCTTAGATGGTTAAGTAACTATCTTTCTTATAAAAGGCTTAGATGACGTGACGTGGTCTACATGACACAGAGACGTTCTTAGTAACACCTTTTAGTATAGATTAGTATAGATATATCACATAGTACTAATTTAGTGTCAAATTTAAGAAGCGCCGTGACATAGAGTAGTA
novel_mir33	NW_018743212.1	+	TTGCCTTTTACACAGATCGACTTAACCTGC	AGTAAGGAGAGTTGCCTTTTACACAGATCGACTTAACCTGCAAGCTAGATATTTTGAGAGTTACAAAAAAGTTAAAGAATTTTCACTCTTAAAGTGTTTATAGTGAAGATAGAACTTCATAGTCACAATGTAAGAAGGTATAATACTGTTATCTTTACC
novel_mir34	NW_018743212.1	-	TTTGAGGAAAGGACCTAAC	ATAGTTTTTACAGTGAATTCCATTAAATGAGGTCAATTTTCCGCCAAAGTAATTAAGCTTTGAGGAAAGGACCTAACGATACAAGTTCATTACAACCCCTAGCGTCCCAACGAGCTACATTGTGCGCTAAAGTATTACCCGCACGCTGCACGCTGGAAAAAAAAGAACTAA
novel_mir35	NW_018743252.1	+	TGCGAAGGCCCTGGATCCC	GCCCATCTCCTCGGGCAGAGGGAGGTGCGAAGGCCCTGGATCCCCACCCGCGCAAAAAGAAGTTGGAGTGCAATACCCTATATGGTGAAAGTCCAGTAGCCGAAAGCATCACTAGCTTACGCTCTGACTCGAGTAGCATGGGG
novel_mir36	NW_018743285.1	+	ACAAGACAAGCTTCCGATTATAGCAGG	TGACCATGAGTCTCTCATACTCATTCTGCAAACACGCACAAACCCTCTTTCCTGGAGGGCTTAACTCGAGTTCTATGAACTTCCACAATAATCACAAGGATGAAGTGGTGGTTGTAATGGGTGCCACAGGTACAGGGAAGTCGAAACTTTCGATTGACTTGGCAATTCAACTTCAGGCTGAGATTATAAATTCCGATAAGATTCAAGTGTACAAAGGGCTGGATATTGTCACGAACAAAGTGACAGAAGAAGAGTGTAGGGGTGTACCCCATCATCTGTTAGGGATAATCGATCCTGATGTTGAATATAATGCTAATGATTTCCGGCATGATGCCTTGCTTGCTATTGAATCCATCATCGAACAAGACAAGCTTCCGATTATAGCAGGTGGATCAATGA…
novel_mir37	NW_018743292.1	+	CTTCCTCCCTGCTATTACGACTATTAC	ATTTCAATTGACTGTTTATTGTCTTCCTCCCTGCTATTACGACTATTACGAAACAGAGGGAGTATAAGTCAAGGGGGAGGGAGAGTGAAAAGTTGGTGTCCAACTTTTTAACTACCCAAATTGCCCTTCAAAATCTAATATTGCTAATGTAATGTTCTAATTAAAAATTTCAATCAAGCTACAATAGATAAATTGGAAA
novel_mir38	NW_018743292.1	-	GATCTTTCATAAATGAAGCCCATGCATAAC	TACCGATGTTCTTGTACACAATGACGCAGTGAGCAAAATACAATCATATTTGTGCCTCCTAGTGCCATGTACGGGCCATAATAGCAAAGCTTGTGTACAATTTGACATTTTTTGAATGGGTCAAGAAAAAGGTGTGTCGTGCCGAGCTTGTGTTGATCTTTCATAAATGAAGCCCATGCATAACCTTATCCATGCGTTATATTGTACTTGTACTCGGTC
novel_mir39	NW_018743389.1	-	AATATCAGGGTCATACCAAT	TCTACTTGTGGTGCTCACTATTTTTTTACCTATTGTTGATGATTATTCGAGAGGTGTTTGGGTTTATTTATTGCCGTTAGGGAAAGGACCTCAGTGAGACGATAACTAGTGTTTGAATCAGGCCAAACTTAATTACTCGGTTTAGTCGATTACTATATCTTTGTCCGTCTTAAGTTTCCTTGTTTTCCTATAGGAATATCAGGGTCATACCAATGCTAAAGTGTAACAAAGTTGAATTGATTGAGAATGAGACAGTTCTAAAGAGGTAGTAGGAGTACACGAGTAGC
novel_mir40	NW_018743510.1	+	AATGAAGTATTCAATCAAGAA	AGCCAATACAATGATGTTTTCGACTTGTAAACCTCAAGAATTACAATGGGAGGTTAGAAGAGTAAAAGTCATCTCAGAAATCAAATATTACAAGGCAGATTTGGTTTGCATTCAAGAACTTGAATGCCTTGGCCTACAATATGATAATAATGAAGTATTCAATCAAGAAATTAAGGAAATGGGGTACATTTATGAAACAGCAACCACACAGGAGCAAGTTTATACAAAAAATAAAGAAACTAGGCTGGGTTGTGTGACACATTTCAATTACATGCTTCATTTCAGGCACACTTAATTTTCTAAGTTTGGTAGGATTATATTCGTTATTGCCTGATTGTGGGCATATTGGC
novel_mir41	NW_018743518.1	-	GAAGCACACGATTAGGCCGTGCCGACATCC	GGCTTAGTACATAGGTTAGGTATGAGGCATGAGGTAGGCACGACATGTTACTGTGTTGTCAACTACAATAAAAACAAGTTATTTAAACATATAAACATGACACGGTGACACGTGGACTTATATAGTGTTATCTCAAACTGGCTTATAAAAAATTCATTATAACATGACACATATTTAGTAGGATGGGTCACGGGTCGGGCCTAGCCAGCCCCGAAGCACACGATTAGGCCGTGCCGACATCCATCTCTACAAGAATACAACAAAGCA
novel_mir42	NW_018743518.1	-	TTAAAGTCTGTACGACTGTACTTTACACAA	TACTTTTACATTTTTTGAGACAGAAATGCAGTTTATAGCTAAATATTTGTACTAATTGTTTTATTTGATAATGTTTATCAACAAATCCGATGTCGTCCAGCGGTTAGGATATCTGGCTTTCACCCAGGAGACCCGGGTTCGATTCCCGGCATCGGAACTTTTTTGCCTATCCCTTGACAAGTGCATTTAAAGTCTGTACGACTGTACTTTACACAAAATAACATTTCGAAGTTTTTTTGTCTTTTCAATGCTAGGAGTT
novel_mir43	NW_018743522.1	+	TACTGATGCTACGGTTGGCAAGGATCTTCT	CGTTGATGATGGAATTTGTTCGAGCTTTTATTTCCAAGTTCCCTCACCCATATTGAACAAGAAGATAGCTAGAGAGTTACCAAGTGTACTGATGCTACGGTTGGCAAGGATCTTCTCACGTTGCTGAATTTTTTGTGGTCAAAATCTGGTGGTTTGGTTGATCGGTGAGGGGGATGAAAGTTCTTGGTTTAAACTTTACACCATTTCTTTGGGAAATATAAGACTCCTTGGTTCTTTACGCTCTAGCTTTGCGTTTTTGACAAAAAAAGTTTTGATTTTAAAATCATTGAATGATTTAGAAAATGTACCATAATCAGCCTTCCATACCAGCCAACCACAACCAAATCATTGAATAGTATAATTAAAAAAAGTTTTGATTTTAAAATCATTGAATGATTT…
novel_mir44	NW_018743522.1	+	TGTTTCTTTAAAAACGGATTCCACACAAT	AGTGGGATGGAATGACAAGTTTTAAATGTTTCTTTAAAAACGGATTCCACACAATTAGTGGTTTGGAACGACTGTTAGCAAATATTTGATACCCACA
novel_mir45	NW_018743548.1	+	TGTGAAATATAGTATCGGTATGTTT	TCTTTGGCAAAATTATCCAATAACGAACGTTTTCGTATCGGCATGTGTGAAATATAGTATCGGTATGTTTTACATGTAATATATATTGATGCATGAATTATTATGCCGACATGTGAGATGCACACGCTGATTATGAGATTATACGAAACACTATGGTCTTGCATGATTTTTGCCAAAGT
novel_mir46	NW_018743593.1	-	GGTGATAATGTGGAAATTGTACGTTTGTGC	TGATAGAGCTAAGTCTGATTTTTGTACTTTTTCGCATATTAAACGGTCTTGTAATACGGTGGCTCATCTTGTAGCAAGAGGGGACACGGGTGATAATGTGGAAATTGTACGTTTGTGCTCCTTTCCACAAAGCTTATAAACTTTGGCGGAAATAGACTTGGGATCTATTC
novel_mir47	NW_018743697.1	+	GAGCTCAGAATTGTTCGAAATTTGAGC	TACAAGTATACCTCTTCTCTTTATTTGAGCTCAGAATTGTTCGAAATTTGAGCAAAACAGAGAGTTTATGTTTTGGAGTTCAGTGTTCAATTCGAAGGGTGGTGGTTGTTTGTT
novel_mir48	NW_018743783.1	-	GAAAGCTAGGGGAGCGAATGGGATT	GGCGAAAGCACTCTGCTAGGCCGACACTGACACTGAGAGACGAAAGCTAGGGGAGCGAATGGGATTAGATACCCCAGTAGTCCTAGCCGTAAACGATGGATACTAGGCGTTGTGTGTATCGACCCGTGCAGTGTTGTAGCTAACGCGTTAAGTATCCCGCCTGGGGAGTACGTTCGCA
novel_mir49	NW_018743858.1	+	ATTTCAATTGCCAACGATTTATCATTCCGC	ATGTCTATTTCAATTGCCAACGATTTATCATTCCGCAGTTTAAAATTATCTTATTAGTCACCTTGATTGTTGGACAATTTGAATTGGACAA
novel_mir50	NW_018743920.1	+	ATCAACCGCCGTACCTCCGTTTTACATTA	TGTCATTATTTATCAACCGCCGTACCTCCGTTTTACATTAACTTAAATTTTTATTTTTTGTGTAAAACGGTTTTACACTAAGATTAGTGTAAAACGGATGTTTTGCGGTGTGATTGGCAAGAGAGTGGAGTGGAGTATGGAGATGAGTGTAATCCGTTTTACACTAAATTAATGTAAAACGGTTTTAAATAAAAGTTAGTCAACAAGAATTCCATGCACAAGTGATAATGATC
novel_mir51	NW_018743955.1	+	AAGAGACGTTCTGTATGTTAATACATATG	ATCGTCTTTATATAAGAGACGTTCTGTATGTTAATACATATGGAACGGTTAGCATAGTTAACCGTTCTCTATTTTTTTTACTCAAATAATTAAAAAAATAATTATTTATTATAGATGATATAGAACGGTCATCTTGACAACCGTTTTATATTGTATTAACTTTTTTTTTTTTAAATTAGGATGAA
novel_mir52	NW_018743977.1	+	TTTTCAATCCACTGGCACACTC	CATGGCAGGAACATATTACTCTATTCAATGTTCATCGTCTTGAACCTAATCAGTTTTCAATCCACTGGCACACTCGGAGGAGCTCCGTTAGCAGAGAGTGGTCAGAGCACCATGGAAAGACTTTTGAATATGGATTTCAATCTGTCAACACCTTAGGGACTAAAGGTCTCCTTACAGATTGGTGTTCCAGCCATC
novel_mir53	NW_018744066.1	+	GCGAAGATGATTAATGCTGTATTTCTGACA	GAATGGCGAAGATGATTAATGCTGTATTTCTGACACCTCTTGTATGAGAAGTGCTTAAGTTTGATTAAATTGAATTTAGGTTCTTCACTGAGCAGATTAAGCAAAATTCTGAGCCGTTA
novel_mir54	NW_018744072.1	+	TTACTATTCATAGGGTTAAAATAAAATAAT	CATACAACCTCCATTTCTGAAAGTTCGACTCACTTACTATTCATAGGGTTAAAATAAAATAATTTTGACCACATTTAATGACTTATACAATATAAATAAATTAGCATATGAAATCTTATTAGATTCCTCTTATTATAAATTTTTTCAAATATCAATTTTTTATAATTTTCACTTATATATAGCCGAAGATATTCATAGTCAAATATGTTGATTGGAGACCGTACAAATACAAAGTGAGTCGAACTTTTATGAACGGAGGGAGTATA
novel_mir55	NW_018744080.1	-	GATACTTATGAAGCAAATCGAT	CGAGTTTCAGAGAGGAATGAGTTAATTGCCTTGAGTGTGGAAGGTCCGGAAGCAGAAATTGTAGATACGACGCGATTAAAGAGGAAATTTCAATTAGATTATGGTCATACATGTGTGATAAGATGATACTTATGAAGCAAATCGATATATTCCTAGTAATAGAGAAAGATACCGATCTCAAAAGAGAATAAAAAATGGCAAATTGCATTTTAAATTACTTTGTAGTATTAGGATTTTCTTGTTTCTTGTATTTTGCTTAGACATGTTCTTTTGAGTTGTTGTGGTCCGCTCTGTTAAATACGCTCAATTCTACTCTGAAACTCA
novel_mir56	NW_018744080.1	+	AAAGTTCTCCGATATTGACTTGGTCACG	GTGAAAAACTACCTATTATAGTTCAGAATTTGCGAGAAACTACCTATTAAAAAAATGTTGTAATTGACTACCTAATTTTCGAAAAATGTTGTAATTTACTACCTTACGTCGGATTATGAAGGAGTTTGACCAAAGTTCTCCGATATTGACTTGGTCACGTGACCATCACGTGACACTTAATGACCCTTTTCTTTCACCAAGTGTCACGTGACCAAATCAACGCCGGAGAATTTTGGTCAAACTCATTCATAATCCGGCATAAAGGTAGTAAATTATAATATTTTAAAAAAATTAGGTAGTCAATTACAACATTTTTTTAATAGGTAGTTTCTCGCAAATTCTGGATTATAATAGGTAGTTTTTCA
novel_mir57	NW_018744128.1	+	TTGTGTCTTGTCGTGCTTCTCTA	TGTCATGCTGAATCGTGTTGTGTCTTGTCGTGCTTCTCTAAAATAAATGCGGTCCACGGTCTGACACTACACATAGTAGTTAGCTTGTTGTTTTGTGCCTAAATCATGTCCATGTTGTGTCTTGCTTCTTTCGTGTTGGGTCGTGTTGTGCCTCAAATTGGCCTATTTTAGTGCGATCCTTAAGTGCACCCTCTTATATTGATGTACATCTAGCTACTTGATTGTTTGTTGTCACTTTTGATGGGTGAAACCACGAAATCAATGTTCTTGCTTGGCT
novel_mir58	NW_018744137.1	-	TTGACTCTTTTATCGTATTTTGTGATTATC	TGGTTCTTGGGCCTTGGGTATTAGGGGAGATGGATTGTGAGATTTATGACCCAACTTAATAATGACGTTGAAGGCTGAAGCTGACCTAGTTACAGAGAGATATCGGAATTTATGAAATTGATTGACTTATTTGACTCTTTTATCGTATTTTGTGATTATCGTAATTTTAGTGTTGAATAGACCCAAGGTCTAGCTCGAACCT
novel_mir59	NW_018744167.1	+	ACGACAGACTTGGCTGATATGTTTCACTT	TTAGTAAATAAAAGTCAAATATATTATGAGAAGGTATTGGGTGCGGACTGCAGTACGCATGATTTGCGTACGACAGACTTGGCTGATATGTTTCACTTGTTGGCTGATATGTTTTTTGTGTTGGCTGATATATTCCTTTTGTTAATTGATATGTTTTTTTTTTAATGTTTAATATGTTTCTTTTGTTGGCTGC
novel_mir60	NW_018744537.1	+	CGAGTAAGTAACCCAGACCGAGTA	GCAACTTTTGTGTGCGATTGGCCACACTGTGTGGCCAGCTGACACACCAAATAACCCCTGACTGATCGAGTAACCCTTAGCCGACTTAGTAACCCTTGACCGAGTGAGTAACCCAGACCGAGTAAGTAACCCAGACCGAGTAATCCCTGACCGACCGAGTAATCCCTGGCCAAGTAACCCGTATAGCACTAACAAAATAACCCTTATAATGGTTGGCCACACAGTGTAGTCAGCCACATATAAAAGTTGA
novel_mir61	NW_018744593.1	-	GCCTTAATTATGGCCATTGATTA	TGTACTTTAATCAATCGGCCTTAGTTATCTTGCTTTTTAATTAGCCTTAATTATGGCCATTGATTAAGGTATT
novel_mir62	NW_018744662.1	+	TGATGCAGCCTCATCAAGATTCACGA	TTTGCTGATGCAGCCTCATCAAGATTCACGATCAGCTAGCAACTGAGCAATCGAATCGACCCGATATTGGCGATTCGTGCTTTCGAATACGCGAATCTTGATGATGCTGCATTGGCAAT
novel_mir63	NW_018744718.1	+	ATATGTTGCGTGTCCAATCTTATAAG	GGTGGCAGTGGAGAAGAAATAGGAAAAAAAAAAAAAAAAAGTAAGTTGATCAAAACATATGTTGCGTGTCCAATCTTATAAGTAATCACTCTGTCTATAATCATATATGCATGTTTGTACAGTATATATGCCCTCTGGTTAAAGATTAAAGATGACTTAAAGATTAAAGATGACATTGGATCGAGACAGTTGTAGTCTACATATAAACATGATTAATCGAGCTCAAATTAGTCATATATGATTCTTGTTTGTGTTAATCCAGGCCATG
novel_mir64	NW_018744745.1	+	AGTATCACGTGGCACCTAAACTTTTTAAGG	ATGTAAATGAGGAGAGTATCACGTGGCACCTAAACTTTTTAAGGAACGCCTTGAGTAGAGTGCCACGTGACACTTATATTTCTTTAGGATCAC
novel_mir65	NW_018744835.1	+	CTATCAGACCGACACTTCACA	TTTTTTTTACTCTTTACGGAGATTTTTGTTTTTTTTTTTTTTTTGGAGGTAAGATAAAGGATCCTATCAGACCGACACTTCACATGAGTCAACCCGACCCCATTTAGCGGATTAGACAATTTGGGAAAGTGGGGGGAAGGTAAGAGAAT
novel_mir66	NW_018744874.1	-	ACGACTCGCTTGAGCATGAGATATA	TTGGTTATGGGCTCTTATTTTAAAAGAGCAGCATGAGTCTAACACGACATGATTATTTCTTAGCTCGTTCTAAGCACGACTCGCTTGAGCATGAGATATACTAGCACTGCACGTGGTGGCGTGGTGATAACATGACTTGTGCCCATAATTAT
novel_mir67	NW_018744874.1	+	ATACTGCCTCCGTTACAGGTTATGTGCA	TTTAATTTTCTGTTTTCTTATACTGCCTCCGTTACAGGTTATGTGCAACGATTTGAAATAAAGCAGAGAGGAAAAATGTCTAATCGTTGCACATAACTTGTAACGGAGGTAGTACTTACATATGTTAACACGTGCCAATTGTCAAAGTAACTTGTTATTACAGGTTGAGAATAGATTGAACTTGTTAAAATAAAGCTCATCCCAAATTAGGATTGTTGTAGAATAAATAGAAAGTTGAT
novel_mir68	NW_018744874.1	-	CGATTCCCGGAACGCAAATGTATTTTCCT	AGGAGGAATTGAGTTAGTGTTGCGGTGGTTGAGGATATATAATTAAGAATTAACTATAATAAAGGTTGTGCAAAGTTATCAACAAGGGCGTTTGGTCTAGTGGTATGATTCTCGCTTCGGGTGCGAGAGGTCCCGAGTTCGATTCCCGGAACGCAAATGTATTTTCCTCCG
novel_mir69	NW_018744874.1	+	GTGAGCTACTGGACTCGACTCGAAACTTTA	AAGGACCAAAATTTTAACGAGCAGATTGTGAGCTACTGGACTCGACTCGAAACTTTAACGAGCACGAGTCGAACAGGTTTTATTTGCTCGAAACTTTAGTGAGCACGAGTTGAGCACATGTAAAAAGTTTTCGAGTTGAGTCGATCACTCCTCAACTCGTGATCGACTCACTCGATAAGCAACCCTA
novel_mir70	NW_018744878.1	-	GTGCTTACTCTCTGTCTGTCTC	AGGGAGGTGACAGAAGAGAGTGAGCACACATGGTTCTTTTCTTGCATCTTTTCTTATGCTTGAAGCTATGCGTGCTTACTCTCTGTCTGTCTCCCCCG
novel_mir71	NW_018744878.1	-	ACCCGAGAGACCCGGGTTCAAGTCCCGGCA	ATACTCGTATGTTATTGTTAAAATTTATTCTACTATAACTTTCAACAAATCCGTTGTAGTCTAGTTGGTCAGGATACTCGGCTCTCACCCGAGAGACCCGGGTTCAAGTCCCGGCAATCAGTAAAAATGAGTAA
novel_mir72	NW_018744878.1	+	AGTGAGACTTAGAGTCATGATGTAACACTG	GTGTTTGGTTGTAAGCAAATGTTAGATTGTGTTTTTAGGGTGTATTTTTGGGTTAGCTAGTAAGCTAGACACGACAGTGAGACTTAGAGTCATGATGTAACACTGATTGAGTAGTTTTGGAAAATTGATGTAAACATAGCATTACCATATGCCATGTCATGTTGTCATGTTGTCATGTTATGATTGTTATCTATTTTCAACTATTGAACTACATCTAAATAG
novel_mir73	NW_018744878.1	-	GCTTAATTTGGAAATACGTTTT	TTGGGTCGGGCCCGGCTTAATTTGGAAATACGTTTTTTATGCATATTCGAAAAGCTCGCACGACCTGACAATTGGATTTGGCTTTGGGCACAAAAAAATCCAGCCCGACCCAT
novel_mir74	NW_018744890.1	+	CTTGAATGTGTGTACGGTGAAAGATC	TAGTTTGGGACCTACTCGATCAGCCAATATTGAAGGTGTAATTCAAAATTTGCGAGTTAGATACTCGGTTAATTAATGGCTTATCAGTTATCATCTTTTAGCGTGGCGATTGATGATTCACATCTTGAATGTGTGTACGGTGAAAGATCCTCTCAAACTT
novel_mir75	NW_018744991.1	+	ATTGGTACGGGCACGACACGACACAACACG	TGGGCCGTGCTGTGAACAAGTTTTTTGGAAATTGGTACGGGCACGACACGACACAACACGACACGACGTTATGGCCCGCGTGCCGACTCACAAGCATGGCCCG
novel_mir76	NW_018744996.1	+	TCGCTTTCATGAGTTATCGAGGGAGAG	TTATGGGCTACTATCGCTTTCATGAGTTATCGAGGGAGAGTTACAACTCTGACAAATTAATCATCCATGGCGCGGTTTCCTAACCAACATTCAAACATGCAGCTATTAACTCCACCCCACTCCGCTTCAATAGAATGTGTAGTAAAGTTTATTGGTATAGTTGTTGGCGAGGCCGGGAACGAAGATGTTAACGATAAATTTAATTTGTCAGGGTTGTGATTCTCCTCCGATACCATGGGAATGATAGTAGCTGATGAA
novel_mir77	NW_018745003.1	-	TGATCATACGACATGGCCAGTCATAT	CTTCGACAAACAAATACAACAACTTTTGTGTGCGGCTGGCCACACGGCGTGGCCAGCCGACACGAGTAACCCTAACCGATAATAACCTTTGACCGAGTGAGTAACCCATATATCGTAATAGTTGATCATACGACATGGCCAGTCATATATAAAAGTTTCAAGTTTGTGAAC
novel_mir78	NW_018745024.1	-	ACAATTTTTAACAATCTCTTTTCC	AGTTGTTACAAGTTTATATGAAAGTTAGAAGAGGAAGCAAATTCCTAACTCAGTTAAGATTGGTGAGAAATTGTTAGAAATATCTACTAATGTCCCTCTTACTATGACTTGTTATAGCAAGAGGGACATTAGCACAATTTTTAACAATCTCTTTTCCAATCTTGACTAAGTTAGAATGTTAGCGCGCTTACTCCTAGCAGTTCGGAACTCGCTGTAATAATA
novel_mir79	NW_018745068.1	+	CATAGGGTCTTTGGAAGTAACT	CTGTTGGGTGGTCGATTGATCCATAATGAGTATATTTATGCATTGCGGAGTGCAATGCATATGCATAGGGTCTTTGGAAGTAACTGAAGCTTAGCTTCGAATTGGTCCTGAGGAAGCATACAAAAAAAAAAAATGCATAAAATATGCTTCCTCAGGACCAATTCGAAGCTAAGCTCCAGTTACTTCCAAAGACCCTATGCATATGCATTGCACTCCGCAATGCATAAATATACTCATTATGGATCAATCGACCACCTAACAA
novel_mir80	NW_018745174.1	+	ATAGGTGCATTGCTTTGACTTTTTACATTG	TCCCCCGTTTCTCAATAGGTGCATTGCTTTGACTTTTTACATTGTTTATAAACTTAATTTGATTTTTCATATCTTTGTTTGATTACAGGAGTCAAAGTTAATATATAAATAGTGTAAAAAGTCAAAGTGATGCATCTATTAAGAAACGGAGGT
novel_mir81	NW_018745240.1	+	TAGAAATATCTACTAATGTCCCTCTTACTA	CGGTTAAGATTGGTGAGAGATTGTTAGAAATATCTACTAATGTCCCTCTTACTATAACTAGTTATAGCAAGAGGGACATTAGCACAATTTTTAACAATCTATTTTCCAATCTTGACTA
novel_mir82	NW_018745281.1	-	ATACCAATGTGTTTTGGGTGGGAC	AACTAGATGTTCCATCCACGTCCAAATTTGAGGAGAACGAAGCCTTCTATATACAAGAAATTGATACCAATGTGTTTTGGGTGGGACGAGCCCACACTAAAGCAAATCGTTGCAAGCTAGGACCCAAAGAGGACAATATCTAGTA
novel_mir83	NW_018745403.1	+	AATGTGTCTCCGAGCCGGGTCAGGTCAT	TTGGGTCGGGTGGGGTCAAAAGGTTAATGTGTCTCCGAGCCGGGTCAGGTCATAGGTAATACGGGCCGAGTCGAGTCAAAGCGATCTGACCCGTCCCATGAATATGAATATTAAAAAATAGTTAAAATAGGATAAAATAGTTGTTTTAGTTTGACTTGTTAATGACCCGACCTGACTCAATCCGGCCTGTTAAAAGTTGTCCCTTTAAGAACCCGACCCAT
novel_mir84	NW_018745454.1	+	TTTGGCAATCGGCGGTTGGTTGTTGG	GTAGATATTAAGGGGTTGTTTGGCAATCGGCGGTTGGTTGTTGGCTTGTTTGACTAGTTGTATGGGTTGACTTTTTAAGTTATTGTGTTAAGCTGACTGTTTTCAAAAGTGTTTGATAAAATTATTAATGATTGTTAGTTGTTTATTAGTGATAAAGTGGACCAACAAGCCAAAAGCCAATAAAAAAAAGCTACTCTTATTAGCTTTTGGCTTTTGGCGGAAAAGCTAGCTTAAAAGCCAACAAAAAAGCCAACTATCAAACATATTTTTTGGCTGTTTGA
novel_mir85	NW_018745461.1	+	ACTCGACCATGAAAATTCCAGATCT	TTGGTCAAACTCGACCATGAAAATTCCAGATCTAGAATTTTCATGGTCGAGTTTAGCCAT
novel_mir86	NW_018745540.1	+	CGCCTATGTGGCGTGACAC	ATGTGTCACAATAATACCTAGTTTTCGCCTATGTGGCGTGACACTTGGCGAATAACTGGAATGCCAAGTATCGCTGTTTCATGGCCTGACTGCGAGACCGACTTTACTTATTTTAATGATATAA
novel_mir87	NW_018745684.1	+	TCCCTCCGTCCCGCTAAGATTGCCTCATTA	TTACTCCCTCCGTCCCGCTAAGATTGCCTCATTAGATTCATGGATCAAATGAGACAATCTTAGTGGGACGGAGGGAGTAT
