# Supplementary material for: Transcriptome and Small RNA Sequencing Reveals the Basis of Response to Salinity, Alkalinity and Hypertonia in Quinoa (Chenopodium quinoa Willd.)
Source: Int J Mol Sci. 2023 Jul 22;24(14):11789. doi: 10.3390/ijms241411789 (PMC10380837; doi:10.3390/ijms241411789)
Supplement: Supplementary file 1 [file ijms-24-11789-s001.zip › Tab.S7 Sicientific name for abbreviation.xls]

## Sheet: Sheet1
Abbreviation	Scientific name
aau	Acacia auriculiformis
ahy	Arachis hypogaea
aly	Arabidopsis lyrata
ama	Amaranthus mangostanus L
amg	Acacia mangium
aqc	Aquilegia caerulea
ata	Aegilops tauschii
ath	Arabidopsis thaliana
atr	Amaranthus tricolor L.
bcy	Bruguiera cylindrica
bdi	Brachypodium distachyon
bgy	Bruguiera gymnorhiza
bna	Brassica napus
bol	Brassica oleracea
bra	Brassica rapa
cca	Cynara cardunculus
ccl	Citrus clementine
cme	Cucumis melo
cpa	Carica papaya
crt	Citrus reticulata
csi	Citrus sinensis
ctr	Citrus trifoliata
dpr	Digitalis purpurea
egu	Elaeis guineensis
far	Festuca arundinacea
ghb	Gossypium herbaceum
ghr	Gossypium hirsutum
gma	Glycine max
gra	Gossypium raimondii
gso	Glycine soja
han	Helianthus annuus
har	Helianthus argophyllus
hbr	Hevea brasiliensis
hex	Helianthus exilis
hpa	Helianthus paradoxus
hpe	Helianthus petiolaris
htu	Helianthus tuberosus
hvu	Hordeum vulgare
lja	Lotus japonicus
lus	Linum usitatissimum L.
mdm	Malus domestica
mes	Manihot esculenta
mtr	Medicago truncatula
nta	Nicotiana tabacum
osa	Oryza sativa
pab	Picea abies
pde	Pinus densata
ppe	Prunus persica (L.) Batsch
ppt	Physcomitrella patens
pta	Pinus taeda
ptc	Populus trichocarpa
pvu	Phaseolus vulgaris
rco	Ricinus communis
rgl	Rehmannia glutinosa
sbi	Sorghum bicolor
sly	Solanum lycopersicum
smo	Selaginella moellendorffii
sof	Saccharum officinarum
ssl	Salvia sclarea
ssp	Saccharum ssp.
stu	Solanum tuberosum
tae	Triticum aestivum
tcc	Theobroma cacao
ttu	Triticum turgidum
vun	Vigna unguiculata
vvi	Vitis vinifera
zma	Zea mays
