# Supplementary material for: Transcriptome and Small RNA Sequencing Reveals the Basis of Response to Salinity, Alkalinity and Hypertonia in Quinoa (Chenopodium quinoa Willd.)
Source: Int J Mol Sci. 2023 Jul 22;24(14):11789. doi: 10.3390/ijms241411789 (PMC10380837; doi:10.3390/ijms241411789)
Supplement: Supplementary file 1 [file ijms-24-11789-s001.zip › Tab.S8 Differential expression of miRNA.xls]

## Sheet: saline only
miRNA id	Expression(CK)	Expression(Saline)	log2Ratio(Saline/CK)	Up down regulation	P value	Q value	Expression(CK)	Expression(alkaline)	log2Ratio(alkaline/CK)	Up down regulation	P value	Q value	Expression(CK)	Expression(PEG)	log2Ratio(PEG/CK)	Up down regulation	P value	Q value
miR827a	5.83418	8.71499	0.517104	UP	3.36043e-08	8.37354e-08	5.83418	7.19362	-0.0664021	DOWN	0.498331	0.591768	5.83418	4.28344	-0.577037	DOWN	1.63264e-07	4.99788e-07
miR167c_1	388.977	591.2	0.552735	UP	0	0	388.977	651.023	0.356726	UP	8.38495e-238	1.41613e-236	388.977	503.84	0.232905	UP	7.84831e-93	7.35779e-92
miR1436	0.62723	1.06108	0.738318	UP	0.00728023	0.0125749	0.62723	0.425881	-0.922983	DOWN	0.00785345	0.0129753	0.62723	0.532857	-0.372878	DOWN	0.250659	0.348138
miR396h	2.18292	4.12093	0.895007	UP	4.56314e-10	1.23857e-09	2.18292	2.71853	-0.0521115	DOWN	0.744842	0.814503	2.18292	1.99756	-0.260897	DOWN	0.126492	0.199724
miR166e-3p	1.47292	3.45383	1.214	UP	1.87004e-13	5.36312e-13	1.47292	0.303221	-2.64545	DOWN	3.98616e-18	1.40906e-17	1.47292	0.285136	-2.49744	DOWN	2.97162e-16	1.20471e-15
miR172a_3	0.582176	1.48061	1.29002	UP	6.62942e-07	1.52677e-06	0.582176	0.734437	-0.0384601	DOWN	0.900981	0.931626	0.582176	0.732421	0.197009	UP	0.518558	0.64284
miR408b_1	0.313527	0.982938	1.56839	UP	3.24313e-06	7.24934e-06	0.313527	0.415752	0.0245497	UP	0.953017	0.972206	0.313527	0.11546	-1.58233	DOWN	0.00518699	0.011115
novel_mir4	15.5872	52.5222	1.70263	UP	5.18917e-293	7.17048e-292	15.5872	25.3356	0.313806	UP	2.17969e-08	5.34375e-08	15.5872	15.4834	-0.142575	DOWN	0.0223474	0.0424317
miR319a	0.149876	1.10421	2.80871	UP	9.928e-13	2.79455e-12	0.149876	0.0163667	-3.65995	DOWN	0.00136995	0.00242131	0.149876	0.274609	0.735986	UP	0.180006	0.275519
miR166m_2	3.11062	0.405771	-2.95986	DOWN	3.76908e-37	1.73606e-36	3.11062	13.304	1.68057	UP	2.08566e-65	1.50962e-64	3.11062	5.46977	0.64812	UP	8.53887e-08	2.72517e-07
miR172d-5p	0.192494	0.0616212	-1.73973	DOWN	0.0220273	0.0372016	0.192494	0.214356	-0.231105	DOWN	0.676332	0.767182	0.192494	0.115098	-0.890454	DOWN	0.162938	0.251966
miR172b-5p_3	10.9723	5.24434	-1.10968	DOWN	1.57523e-34	7.0422e-34	10.9723	12.594	-0.160916	DOWN	0.0268376	0.0412052	10.9723	9.51672	-0.343108	DOWN	8.69404e-06	2.3711e-05
miR171d_1	2.68378	1.3946	-0.991984	DOWN	3.17888e-08	8.05317e-08	2.68378	2.46088	-0.498957	DOWN	0.0013639	0.00243897	2.68378	2.63191	-0.166167	DOWN	0.271957	0.364228
miR172d-5p_4	2.16113	1.23494	-0.879349	DOWN	7.20839e-06	1.52177e-05	2.16113	3.39626	0.276486	UP	0.0685072	0.0991724	2.16113	2.9289	0.295413	UP	0.0575834	0.101618
miR166h-3p	10.462	6.17539	-0.845619	DOWN	1.16342e-21	4.21046e-21	10.462	18.6906	0.444197	UP	3.17441e-11	8.77293e-11	10.462	16.2712	0.492157	UP	5.52366e-13	2.18039e-12
miR396a-3p	10.8216	6.56128	-0.74171	DOWN	3.45208e-18	1.14069e-17	10.8216	11.2017	-0.326195	DOWN	1.40525e-05	2.96664e-05	10.8216	9.23152	-0.373359	DOWN	1.63154e-06	4.53206e-06
miR168a-3p	97.9764	61.0058	-0.708146	DOWN	3.42872e-140	2.89536e-139	97.9764	121.083	-0.0775442	DOWN	0.00112476	0.00203528	97.9764	147.146	0.444549	UP	3.92973e-88	3.46741e-87
miR166a-3p	873.367	569.328	-0.669831	DOWN	0	0	873.367	1063.04	-0.104475	DOWN	8.77386e-43	4.93936e-42	873.367	1080.29	0.164852	UP	6.47402e-109	8.82821e-108
miR166k	10.1109	6.64601	-0.656385	DOWN	4.4133e-14	1.29004e-13	10.1109	15.1392	0.185634	UP	0.00903953	0.0147743	10.1109	14.2367	0.346842	UP	1.07406e-06	3.09825e-06
miR156e_1	240.393	161.226	-0.553112	DOWN	4.76755e-224	5.57436e-223	240.393	298.542	-0.0716912	DOWN	1.8569e-06	4.03213e-06	240.393	263.574	-0.00761265	DOWN	0.618459	0.724757
miR169h_2	16.4551	11.8401	-0.533104	DOWN	1.49948e-15	4.55842e-15	16.4551	26.1203	0.262539	UP	1.87797e-06	4.02045e-06	16.4551	26.964	0.569512	UP	2.84871e-26	1.42436e-25

## Sheet: alkaline only
miRNA id	Expression(CK)	Expression(Saline)	log2Ratio(Saline/CK)	Up down regulation	P value	Q value	Expression(CK)	Expression(alkaline)	log2Ratio(alkaline/CK)	Up down regulation	P value	Q value	Expression(CK)	Expression(PEG)	log2Ratio(PEG/CK)	Up down regulation	P value	Q value
miR156_2	2.19925	2.58289	0.185885	UP	0.249033	0.323531	2.19925	4.10961	0.513222	UP	0.000371806	0.000715373	2.19925	2.50007	0.0434762	UP	0.786953	0.837184
miR396a-3p_5	5.87449	8.07042	0.411103	UP	1.55509e-05	3.23799e-05	5.87449	10.8832	0.5173	UP	4.85987e-09	1.25203e-08	5.87449	6.32602	-0.0237646	DOWN	0.811881	0.857621
miR398b-3p	35.129	42.7901	0.207446	UP	2.38381e-07	5.75142e-07	35.129	67.1412	0.549455	UP	3.65617e-53	2.22295e-52	35.129	0.0434562	-9.80901	DOWN	0	0
miR166a	4.55235	5.79763	0.295779	UP	0.00717686	0.0125389	4.55235	9.91934	0.731021	UP	3.67939e-14	1.14136e-13	4.55235	6.04946	0.266844	UP	0.0131454	0.0270111
miR160b_1	0.47656	0.734657	0.545673	UP	0.094039	0.141524	0.47656	1.69588	1.44334	UP	4.55327e-08	1.0814e-07	0.47656	0.187073	-1.48957	DOWN	0.000963965	0.00209558
miR390e	0.164399	0.287715	0.749206	UP	0.162628	0.228885	0.164399	0.695014	1.6944	UP	8.46899e-05	0.000173958	0.164399	0.144376	-0.327517	DOWN	0.60276	0.717571
miR319a-3p	9.55958	0.413025	-4.61308	DOWN	1.48426e-148	1.32711e-147	9.55958	41.7461	1.74957	UP	6.37952e-216	8.81534e-215	9.55958	0.542872	-4.27076	DOWN	2.48118e-151	4.65221e-150
miR319_1	0.372029	0.0928955	-2.09818	DOWN	0.00031924	0.000630188	0.372029	2.65511	2.44439	UP	2.12771e-22	7.8881e-22	0.372029	0.0728769	-2.51194	DOWN	3.76925e-05	9.74805e-05
miR162a-3p	18.5536	34.5383	0.818452	UP	7.66306e-61	4.15995e-60	18.5536	0.179515	-7.03615	DOWN	0	0	18.5536	48.4238	1.23641	UP	4.18237e-166	8.96221e-165
miR319a	0.149876	1.10421	2.80871	UP	9.928e-13	2.79455e-12	0.149876	0.0163667	-3.65995	DOWN	0.00136995	0.00242131	0.149876	0.274609	0.735986	UP	0.180006	0.275519
miR167d_1	17.1757	564.897	5.00046	UP	0	0	17.1757	3.55776	-2.6247	DOWN	7.06386e-188	7.66933e-187	17.1757	529.908	4.85535	UP	0	0
miR156h_1	0.358656	0.516149	0.505031	UP	0.182633	0.24351	0.358656	0.105291	-2.11563	DOWN	0.000179673	0.000350131	0.358656	0.344163	-0.190014	DOWN	0.647849	0.725204
novel_mir71	0.672234	0.597562	-0.240924	DOWN	0.439257	0.538444	0.672234	0.340063	-1.33802	DOWN	0.000174644	0.000344751	0.672234	6.88979	3.21124	UP	9.78283e-83	7.72329e-82
novel_mir84	0.377028	0.622692	0.743119	UP	0.0370048	0.0598376	0.377028	0.251867	-0.981877	DOWN	0.0308025	0.0468198	0.377028	0.994081	1.27465	UP	5.55976e-05	0.000136716
novel_mir25	3.90371	3.33196	-0.270854	DOWN	0.0385667	0.0617068	3.90371	2.60903	-0.959087	DOWN	6.41078e-12	1.83856e-11	3.90371	3.89543	-0.146784	DOWN	0.239178	0.33846
miR1436	0.62723	1.06108	0.738318	UP	0.00728023	0.0125749	0.62723	0.425881	-0.922983	DOWN	0.00785345	0.0129753	0.62723	0.532857	-0.372878	DOWN	0.250659	0.348138
miR162a-5p	0.865944	0.933832	0.0800091	UP	0.760427	0.843685	0.865944	0.654159	-0.769737	DOWN	0.00746501	0.012469	0.865944	1.7154	0.846823	UP	0.00015219	0.000362357
novel_mir85	13.8535	10.8073	-0.405624	DOWN	1.19359e-08	3.12803e-08	13.8535	10.823	-0.732565	DOWN	8.75692e-25	3.41295e-24	13.8535	13.9161	-0.132359	DOWN	0.0450466	0.0824023
miR166	0.697943	0.536177	-0.423954	DOWN	0.182597	0.245617	0.697943	0.552117	-0.722684	DOWN	0.0226308	0.0351008	0.697943	0.648063	-0.25275	DOWN	0.400325	0.508888
miR166h-5p	42.3325	34.6637	-0.324977	DOWN	4.96503e-16	1.57226e-15	42.3325	35.0605	-0.653635	DOWN	1.30573e-59	8.26962e-59	42.3325	36.0808	-0.376165	DOWN	1.14353e-21	5.3603e-21
miR396a-3p_4	36.3928	43.1675	0.222465	UP	1.57048e-08	4.04599e-08	36.3928	30.9713	-0.644822	DOWN	3.80202e-50	2.22272e-49	36.3928	50.891	0.35483	UP	2.49658e-21	1.13481e-20
miR166d-5p_2	172.901	150.787	-0.225986	DOWN	2.04776e-31	8.64608e-31	172.901	148.295	-0.591892	DOWN	5.19016e-201	6.5742e-200	172.901	140.888	-0.429845	DOWN	4.29606e-107	5.37007e-106

## Sheet: hyperosmotic only
miRNA id	Expression(CK)	Expression(Saline)	log2Ratio(Saline/CK)	Up down regulation	P value	Q value	Expression(CK)	Expression(alkaline)	log2Ratio(alkaline/CK)	Up down regulation	P value	Q value	Expression(CK)	Expression(PEG)	log2Ratio(PEG/CK)	Up down regulation	P value	Q value
miR166h-3p_1	18.3458	9.82156	-0.939754	DOWN	1.39208e-43	6.61237e-43	18.3458	9.21952	-1.36879	DOWN	4.61679e-87	3.69343e-86	18.3458	29.8103	0.558615	UP	5.41315e-28	2.7999e-27
miR169h_2	16.4551	11.8401	-0.533104	DOWN	1.49948e-15	4.55842e-15	16.4551	26.1203	0.262539	UP	1.87797e-06	4.02045e-06	16.4551	26.964	0.569512	UP	2.84871e-26	1.42436e-25
miR166u	0.71413	0.308754	-1.23193	DOWN	0.000667759	0.0012848	0.71413	0.245556	-1.92298	DOWN	6.39865e-07	1.45163e-06	0.71413	1.21184	0.617341	UP	0.0157849	0.0315698
novel_mir7	2.31777	2.0477	-0.22666	DOWN	0.179122	0.243095	2.31777	2.43925	-0.301494	DOWN	0.0623223	0.0910864	2.31777	4.07901	0.679402	UP	1.28857e-06	3.6469e-06
miR399j_2	2.96017	3.74292	0.297138	UP	0.0297917	0.049762	2.96017	4.19506	0.130655	UP	0.326656	0.410345	2.96017	5.25463	0.692382	UP	2.52613e-08	8.42043e-08
miR398	26.1446	2.97466	-3.19524	DOWN	0	0	26.1446	0.0312319	-10.1087	DOWN	0	0	26.1446	49.9621	0.800873	UP	4.6715e-85	3.89292e-84
miR162a-5p	0.865944	0.933832	0.0800091	UP	0.760427	0.843685	0.865944	0.654159	-0.769737	DOWN	0.00746501	0.012469	0.865944	1.7154	0.846823	UP	0.00015219	0.000362357
novel_mir84	0.377028	0.622692	0.743119	UP	0.0370048	0.0598376	0.377028	0.251867	-0.981877	DOWN	0.0308025	0.0468198	0.377028	0.994081	1.27465	UP	5.55976e-05	0.000136716
novel_mir71	0.672234	0.597562	-0.240924	DOWN	0.439257	0.538444	0.672234	0.340063	-1.33802	DOWN	0.000174644	0.000344751	0.672234	6.88979	3.21124	UP	9.78283e-83	7.72329e-82
miR398b-3p	35.129	42.7901	0.207446	UP	2.38381e-07	5.75142e-07	35.129	67.1412	0.549455	UP	3.65617e-53	2.22295e-52	35.129	0.0434562	-9.80901	DOWN	0	0
miR395a_5	2.94006	7.05664	1.23474	UP	4.14381e-26	1.61502e-25	2.94006	6.97333	0.88962	UP	3.47486e-14	1.10037e-13	2.94006	1.05155	-1.6149	DOWN	4.43809e-18	1.90204e-17
miR408b_1	0.313527	0.982938	1.56839	UP	3.24313e-06	7.24934e-06	0.313527	0.415752	0.0245497	UP	0.953017	0.972206	0.313527	0.11546	-1.58233	DOWN	0.00518699	0.011115
miR160b_1	0.47656	0.734657	0.545673	UP	0.094039	0.141524	0.47656	1.69588	1.44334	UP	4.55327e-08	1.0814e-07	0.47656	0.187073	-1.48957	DOWN	0.000963965	0.00209558
miR164f_1	0.522815	0.368852	-0.58361	DOWN	0.123548	0.177163	0.522815	0.628566	-0.109751	DOWN	0.739719	0.814762	0.522815	0.216256	-1.41241	DOWN	0.000908809	0.00200473
novel_mir29	0.366884	0.321154	-0.231935	DOWN	0.590123	0.684722	0.366884	0.382732	-0.279127	DOWN	0.496865	0.594673	0.366884	0.188827	-1.07454	DOWN	0.0266992	0.049443
miR394a_1	1.33497	5.04412	1.8308	UP	5.3546e-32	2.32543e-31	1.33497	9.95263	2.50998	UP	4.74597e-82	3.60694e-81	1.33497	0.732376	-1.00944	DOWN	4.56195e-05	0.000114049
miR169d-5p_1	16.7204	20.3418	0.206467	UP	0.000402947	0.00078523	16.7204	26.0597	0.268253	UP	9.10907e-07	2.03614e-06	16.7204	10.9648	-0.753243	DOWN	2.98205e-29	1.59752e-28
miR827a	5.83418	8.71499	0.517104	UP	3.36043e-08	8.37354e-08	5.83418	7.19362	-0.0664021	DOWN	0.498331	0.591768	5.83418	4.28344	-0.577037	DOWN	1.63264e-07	4.99788e-07

## Sheet: saline&alkaline
miRNA id	Expression(CK)	Expression(Saline)	log2Ratio(Saline/CK)	Up down regulation	P value	Q value	Expression(CK)	Expression(alkaline)	log2Ratio(alkaline/CK)	Up down regulation	P value	Q value	Expression(CK)	Expression(PEG)	log2Ratio(PEG/CK)	Up down regulation	P value	Q value
miR319a_1	12.5592	25.6421	0.944399	UP	1.92878e-57	1.01095e-56	12.5592	52.3792	1.66709	UP	3.48673e-250	6.62478e-249	12.5592	12.8819	-0.111922	DOWN	0.105379	0.173702
miR395a_5	2.94006	7.05664	1.23474	UP	4.14381e-26	1.61502e-25	2.94006	6.97333	0.88962	UP	3.47486e-14	1.10037e-13	2.94006	1.05155	-1.6149	DOWN	4.43809e-18	1.90204e-17
miR393a-5p	0.47667	1.24255	1.30056	UP	5.39703e-06	1.17193e-05	0.47667	3.17697	2.34146	UP	3.6046e-25	1.48081e-24	0.47667	0.303099	-0.797696	DOWN	0.0462798	0.0826424
miR172e-3p_1	18.494	50.6458	1.39552	UP	2.0609e-210	2.23755e-209	18.494	35.354	0.565845	UP	1.62377e-30	7.71292e-30	18.494	25.1336	0.304188	UP	9.72736e-09	3.39326e-08
miR394a_1	1.33497	5.04412	1.8308	UP	5.3546e-32	2.32543e-31	1.33497	9.95263	2.50998	UP	4.74597e-82	3.60694e-81	1.33497	0.732376	-1.00944	DOWN	4.56195e-05	0.000114049
miR8051-5p	0.35938	1.37158	1.89931	UP	1.74987e-10	4.83601e-10	0.35938	0.810306	0.804938	UP	0.0180664	0.0286052	0.35938	0.51593	0.394949	UP	0.293416	0.386074
miR6300	1.80417	9.51784	2.32262	UP	2.39059e-79	1.51404e-78	1.80417	4.40778	0.908023	UP	1.0796e-09	2.8293e-09	1.80417	2.23925	0.176525	UP	0.309937	0.404266
novel_mir79	0.001	0.213095	4.76807	UP	0.000143857	0.000287713	0.001	0.729737	6.24694	UP	1.04502e-11	2.94155e-11	0.001	0.001	NA	UP	NA	NA
novel_mir48	0.001	0.486217	5.96071	UP	5.11684e-09	1.36449e-08	0.001	0.157667	3.98391	UP	0.00339094	0.00585708	0.001	0.001	NA	UP	NA	NA
miR169e_3	8.15377	0.299623	-4.84148	DOWN	2.02268e-131	1.61814e-130	8.15377	0.470912	-4.50795	DOWN	1.21776e-142	1.15687e-141	8.15377	9.15505	-0.00579619	DOWN	0.944675	0.944675
novel_mir37	0.149579	0.001	-4.36122	DOWN	0.00139081	0.00264253	0.149579	0.001	-4.65995	DOWN	0.000610157	0.00113102	0.149579	0.159879	-0.0525104	DOWN	0.933501	0.939766
novel_mir17	1.44995	0.142692	-3.31727	DOWN	1.14315e-19	3.86131e-19	1.44995	0.346068	-2.4785	DOWN	1.17936e-16	3.9836e-16	1.44995	1.88034	0.232441	UP	0.226781	0.327088
miR398	26.1446	2.97466	-3.19524	DOWN	0	0	26.1446	0.0312319	-10.1087	DOWN	0	0	26.1446	49.9621	0.800873	UP	4.6715e-85	3.89292e-84
miR399f_3	4.12842	1.54112	-1.46131	DOWN	1.37768e-20	4.86994e-20	4.12842	2.16877	-1.2968	DOWN	2.83028e-19	1.02429e-18	4.12842	4.06488	-0.158987	DOWN	0.192478	0.285859
novel_mir36	4.81549	2.06415	-1.28274	DOWN	9.2767e-20	3.20468e-19	4.81549	3.35672	-0.887578	DOWN	1.05519e-12	3.14487e-12	4.81549	4.34015	-0.273003	DOWN	0.0177875	0.0346509
miR166u	0.71413	0.308754	-1.23193	DOWN	0.000667759	0.0012848	0.71413	0.245556	-1.92298	DOWN	6.39865e-07	1.45163e-06	0.71413	1.21184	0.617341	UP	0.0157849	0.0315698
miR166h-3p_1	18.3458	9.82156	-0.939754	DOWN	1.39208e-43	6.61237e-43	18.3458	9.21952	-1.36879	DOWN	4.61679e-87	3.69343e-86	18.3458	29.8103	0.558615	UP	5.41315e-28	2.7999e-27
miR398b	335.59	216.533	-0.700603	DOWN	0	0	335.59	235.598	-0.891867	DOWN	0	0	335.59	311.648	-0.243835	DOWN	2.03624e-73	1.45446e-72
miR169r-3p	4.09004	2.67837	-0.661588	DOWN	1.43534e-06	3.2563e-06	4.09004	2.45954	-1.13227	DOWN	9.44398e-16	3.12062e-15	4.09004	4.11538	-0.133228	DOWN	0.274381	0.364223
miR168_1	4.71676	3.05878	-0.647189	DOWN	3.68651e-07	8.62076e-07	4.71676	3.62826	-0.751542	DOWN	8.94641e-10	2.38571e-09	4.71676	4.49285	-0.208334	DOWN	0.0695651	0.121334

## Sheet: saline&hyperosmotic
miRNA id	Expression(CK)	Expression(Saline)	log2Ratio(Saline/CK)	Up down regulation	P value	Q value	Expression(CK)	Expression(alkaline)	log2Ratio(alkaline/CK)	Up down regulation	P value	Q value	Expression(CK)	Expression(PEG)	log2Ratio(PEG/CK)	Up down regulation	P value	Q value
miR162a-3p	18.5536	34.5383	0.818452	UP	7.66306e-61	4.15995e-60	18.5536	0.179515	-7.03615	DOWN	0	0	18.5536	48.4238	1.23641	UP	4.18237e-166	8.96221e-165
miR162a-5p_1	0.372164	0.673366	0.840416	UP	0.0164442	0.0280845	0.372164	0.56132	0.227577	UP	0.53706	0.627947	0.372164	0.950564	1.21052	UP	0.000153305	0.000359309
miR167d_1	17.1757	564.897	5.00046	UP	0	0	17.1757	3.55776	-2.6247	DOWN	7.06386e-188	7.66933e-187	17.1757	529.908	4.85535	UP	0	0
miR319a-3p	9.55958	0.413025	-4.61308	DOWN	1.48426e-148	1.32711e-147	9.55958	41.7461	1.74957	UP	6.37952e-216	8.81534e-215	9.55958	0.542872	-4.27076	DOWN	2.48118e-151	4.65221e-150
miR319_1	0.372029	0.0928955	-2.09818	DOWN	0.00031924	0.000630188	0.372029	2.65511	2.44439	UP	2.12771e-22	7.8881e-22	0.372029	0.0728769	-2.51194	DOWN	3.76925e-05	9.74805e-05
miR396a-3p_1	60.216	17.9229	-1.8092	DOWN	0	0	60.216	65.1326	-0.236124	DOWN	5.04814e-14	1.53463e-13	60.216	27.0413	-1.2958	DOWN	1.02665e-244	3.07996e-243
miR169b-5p	17.2176	5.27793	-1.68063	DOWN	4.86247e-98	3.35953e-97	17.2176	25.8404	0.207018	UP	0.000147194	0.000294387	17.2176	4.48237	-2.05114	DOWN	7.88216e-135	1.18232e-133
miR162-3p	31.155	21.2475	-0.524717	DOWN	2.35466e-27	9.41866e-27	31.155	56.7394	0.479246	UP	1.35552e-35	6.86798e-35	31.155	15.4272	-1.13391	DOWN	7.32452e-104	8.45137e-103

## Sheet: alkaline&hyperosmotic
miRNA id	Expression(CK)	Expression(Saline)	log2Ratio(Saline/CK)	Up down regulation	P value	Q value	Expression(CK)	Expression(alkaline)	log2Ratio(alkaline/CK)	Up down regulation	P value	Q value	Expression(CK)	Expression(PEG)	log2Ratio(PEG/CK)	Up down regulation	P value	Q value
miR399a_6	5.28082	7.49115	0.456001	UP	4.56243e-06	1.00506e-05	5.28082	10.6884	0.633166	UP	4.04443e-12	1.18222e-11	5.28082	9.85994	0.762341	UP	1.00593e-16	4.19136e-16
miR166m_2	3.11062	0.405771	-2.95986	DOWN	3.76908e-37	1.73606e-36	3.11062	13.304	1.68057	UP	2.08566e-65	1.50962e-64	3.11062	5.46977	0.64812	UP	8.53887e-08	2.72517e-07
novel_mir52	0.161259	0.256311	0.671204	UP	0.217159	0.287027	0.161259	0.91453	2.08519	UP	2.26417e-07	5.21445e-07	0.161259	0.560686	1.63596	UP	0.000258979	0.000588589
novel_mir24	0.399477	0.309266	-0.40186	DOWN	0.336455	0.422654	0.399477	0.001	-6.09291	DOWN	9.25231e-09	2.34392e-08	0.399477	0.001	-5.9449	DOWN	2.25415e-08	7.68459e-08
miR166e-3p	1.47292	3.45383	1.214	UP	1.87004e-13	5.36312e-13	1.47292	0.303221	-2.64545	DOWN	3.98616e-18	1.40906e-17	1.47292	0.285136	-2.49744	DOWN	2.97162e-16	1.20471e-15
miR166e	6.62381	8.79528	0.384696	UP	1.96807e-05	4.04252e-05	6.62381	1.73308	-2.28043	DOWN	1.17569e-63	7.76975e-63	6.62381	2.2001	-1.71113	DOWN	6.51436e-42	4.07148e-41
miR171c_3	0.223456	0.194936	-0.245741	DOWN	0.652629	0.751512	0.223456	0.0918954	-1.65995	DOWN	0.0119193	0.0190709	0.223456	0.0717401	-1.77498	DOWN	0.0103783	0.0216215
miR169c-3p_3	1.96547	1.69258	-0.289268	DOWN	0.118735	0.173536	1.96547	1.05474	-1.29495	DOWN	5.66475e-10	1.53757e-09	1.96547	1.24319	-0.808143	DOWN	4.25198e-05	0.000108101
miR156b-3p_6	3.91342	3.30231	-0.283793	DOWN	0.0305603	0.0504909	3.91342	2.16373	-1.22719	DOWN	4.79878e-17	1.65776e-16	3.91342	2.57206	-0.745117	DOWN	7.19226e-08	2.3453e-07
novel_mir87	6.53623	5.43933	-0.285985	DOWN	0.00487526	0.00861674	6.53623	3.74318	-1.17358	DOWN	1.23783e-25	5.22638e-25	6.53623	4.99396	-0.529299	DOWN	2.85903e-07	8.40891e-07
miR172c_2	1.82068	1.93065	0.0294229	UP	0.871401	0.919812	1.82068	1.20615	-0.995133	DOWN	1.27184e-06	2.80173e-06	1.82068	1.18348	-0.774976	DOWN	0.000138413	0.000334869
miR169a-3p_3	1.32695	1.28534	-0.122706	DOWN	0.575954	0.673423	1.32695	1.17447	-0.584935	DOWN	0.00931036	0.0150551	1.32695	0.940339	-0.64338	DOWN	0.00589983	0.0124644

## Sheet: saline&alkaline&hyperosmotic
miRNA id	Expression(CK)	Expression(Saline)	log2Ratio(Saline/CK)	Up down regulation	P value	Q value	Expression(CK)	Expression(alkaline)	log2Ratio(alkaline/CK)	Up down regulation	P value	Q value	Expression(CK)	Expression(PEG)	log2Ratio(PEG/CK)	Up down regulation	P value	Q value
miR399b	0.997518	2.2139	1.09429	UP	9.10048e-08	2.23109e-07	0.997518	2.36746	0.872015	UP	1.493e-05	3.10872e-05	0.997518	2.46144	1.16175	UP	3.68016e-09	1.31434e-08
miR160a-5p	1.08406	37.8913	5.07833	UP	0	0	1.08406	78.8843	5.82767	UP	0	0	1.08406	5.09844	2.13191	UP	1.11321e-39	6.67927e-39
miR319c_2	0.868997	31.3686	5.12359	UP	0	0	0.868997	28.4204	4.65166	UP	0	0	0.868997	7.44839	2.98552	UP	5.72709e-82	4.29532e-81
miR169v_1	0.119725	16.2464	7.01056	UP	1.70089e-238	2.15445e-237	0.119725	0.858802	2.44334	UP	3.71984e-08	8.97485e-08	0.119725	12.2017	6.52937	UP	2.41971e-185	6.04927e-184
miR157d	0.0454508	201.067	12.0607	UP	0	0	0.0454508	117.339	10.9826	UP	0	0	0.0454508	2.93691	5.9045	UP	3.4719e-47	2.26428e-46
novel_mir66	0.354803	0.001	-5.62425	DOWN	2.88386e-07	6.84918e-07	0.354803	0.157667	-1.60105	DOWN	0.00193987	0.0033892	0.354803	0.001	-5.77498	DOWN	1.33591e-07	4.17471e-07
miR319f_1	0.876874	0.0467811	-4.36122	DOWN	4.8786e-15	1.45401e-14	0.876874	0.109816	-3.43756	DOWN	1.95405e-14	6.31949e-14	0.876874	0.188366	-2.39646	DOWN	5.15815e-10	1.9839e-09
miR319c_1	0.207321	0.0467811	-2.26168	DOWN	0.00477057	0.00853091	0.207321	0.0923624	-1.56041	DOWN	0.0201618	0.0315937	0.207321	0.072639	-1.67544	DOWN	0.0174131	0.0343679
miR167a-5p	15.8588	3.64268	-2.1808	DOWN	5.10681e-130	3.88118e-129	15.8588	6.22608	-1.76512	DOWN	3.61686e-110	3.2339e-109	15.8588	5.61464	-1.66083	DOWN	7.02274e-96	7.02274e-95
miR395b_3	10.8848	2.79821	-2.01977	DOWN	8.53207e-81	5.63859e-80	10.8848	0.738484	-4.2138	DOWN	5.31619e-181	5.38707e-180	10.8848	5.97846	-1.01268	DOWN	1.6343e-31	9.07944e-31
miR160	15.7103	4.19702	-1.9353	DOWN	2.4541e-109	1.7763e-108	15.7103	2.49876	-2.9829	DOWN	5.80982e-200	6.79302e-199	15.7103	3.41649	-2.35313	DOWN	6.08747e-147	1.01458e-145
miR156e-3p_2	0.969923	0.372559	-1.43983	DOWN	6.85656e-06	1.46788e-05	0.969923	0.383608	-1.73856	DOWN	5.04566e-08	1.17991e-07	0.969923	0.532399	-1.02495	DOWN	0.000407129	0.000911482
miR169h-3p_1	1.11506	0.683335	-0.776255	DOWN	0.00372932	0.00682959	1.11506	0.464522	-1.65995	DOWN	1.8786e-08	4.6811e-08	1.11506	0.418197	-1.56085	DOWN	1.6925e-07	5.07751e-07
