# Supplementary material for: Transcriptome and Small RNA Sequencing Reveals the Basis of Response to Salinity, Alkalinity and Hypertonia in Quinoa (Chenopodium quinoa Willd.)
Source: Int J Mol Sci. 2023 Jul 22;24(14):11789. doi: 10.3390/ijms241411789 (PMC10380837; doi:10.3390/ijms241411789)
Supplement: Supplementary file 1 [file ijms-24-11789-s001.zip › Tab.S9 Predicted targets of miRNA.xls]

## Sheet: saline only
miRNA id	Target id	TargetFinder score	psRobot score	NR description
miR156e_1	XM_021857955.1	3	1.5	squamosa promoter-binding-like protein 16 isoform X1 [Chenopodium quinoa]
miR156e_1	XM_021857956.1	3	1.5	squamosa promoter-binding-like protein 16 isoform X2 [Chenopodium quinoa]
miR172a_3	XM_021858650.1	2	1	floral homeotic protein APETALA 2-like [Chenopodium quinoa]
miR169h_2	XM_021859348.1	2	1.5	nuclear transcription factor Y subunit A-7-like [Chenopodium quinoa]
miR169h_2	XM_021859349.1	2	1.5	nuclear transcription factor Y subunit A-7-like [Chenopodium quinoa]
miR172a_3	XM_021860086.1	2	1	floral homeotic protein APETALA 2-like isoform X1 [Chenopodium quinoa]
miR172a_3	XM_021860087.1	2	1	floral homeotic protein APETALA 2-like isoform X2 [Chenopodium quinoa]
miR172a_3	XM_021860088.1	2	1	floral homeotic protein APETALA 2-like isoform X3 [Chenopodium quinoa]
miR172a_3	XM_021860089.1	2	1	ethylene-responsive transcription factor RAP2-7-like isoform X4 [Chenopodium quinoa]
miR172a_3	XM_021860090.1	2	1	AP2-like ethylene-responsive transcription factor TOE3 isoform X5 [Chenopodium quinoa]
miR172a_3	XM_021860091.1	2	1	AP2-like ethylene-responsive transcription factor TOE3 isoform X6 [Chenopodium quinoa]
miR169h_2	XM_021860810.1	3	2	nuclear transcription factor Y subunit A-3-like [Chenopodium quinoa]
miR172d-5p	XM_021861172.1	3	2	clp protease adapter protein ClpF, chloroplastic-like isoform X1 [Chenopodium quinoa]
miR396a-3p	XM_021862485.1	3.5	2	UDP-sugar pyrophosphorylase-like [Chenopodium quinoa]
miR156e_1	XM_021862675.1	2	1	squamosa promoter-binding-like protein 6 isoform X1 [Chenopodium quinoa]
miR156e_1	XM_021862676.1	2	1	squamosa promoter-binding-like protein 6 isoform X2 [Chenopodium quinoa]
miR171d_1	XM_021862798.1	3	1.5	scarecrow-like protein 15 [Chenopodium quinoa]
miR1436	XM_021862925.1	3	1.5	uncharacterized protein LOC110686333 isoform X1 [Chenopodium quinoa]
miR1436	XM_021862929.1	3	1.5	uncharacterized protein LOC110686333 isoform X1 [Chenopodium quinoa]
miR1436	XM_021862933.1	3	1.5	uncharacterized protein LOC110686333 isoform X1 [Chenopodium quinoa]
miR1436	XM_021862940.1	3	1.5	uncharacterized protein LOC110686333 isoform X2 [Chenopodium quinoa]
miR408b_1	XM_021863375.1	3	2.2	protease Do-like 9 [Chenopodium quinoa]
miR396h	XM_021864565.1	2	1.5	uncharacterized protein LOC110687919 [Chenopodium quinoa]
miR172b-5p_3	XM_021864691.1	3.5	2.5	putative pentatricopeptide repeat-containing protein At1g77010, mitochondrial [Chenopodium quinoa]
miR172d-5p	XM_021864691.1	3	2	putative pentatricopeptide repeat-containing protein At1g77010, mitochondrial [Chenopodium quinoa]
miR172d-5p_4	XM_021864691.1	3.5	2.5	putative pentatricopeptide repeat-containing protein At1g77010, mitochondrial [Chenopodium quinoa]
miR172b-5p_3	XM_021864692.1	3.5	2.5	putative pentatricopeptide repeat-containing protein At1g77010, mitochondrial [Chenopodium quinoa]
miR172d-5p	XM_021864692.1	3	2	putative pentatricopeptide repeat-containing protein At1g77010, mitochondrial [Chenopodium quinoa]
miR172d-5p_4	XM_021864692.1	3.5	2.5	putative pentatricopeptide repeat-containing protein At1g77010, mitochondrial [Chenopodium quinoa]
miR172b-5p_3	XM_021864693.1	3.5	2.5	putative pentatricopeptide repeat-containing protein At1g77010, mitochondrial [Chenopodium quinoa]
miR172d-5p	XM_021864693.1	3	2	putative pentatricopeptide repeat-containing protein At1g77010, mitochondrial [Chenopodium quinoa]
miR172d-5p_4	XM_021864693.1	3.5	2.5	putative pentatricopeptide repeat-containing protein At1g77010, mitochondrial [Chenopodium quinoa]
miR169h_2	XM_021864799.1	3	2	nuclear transcription factor Y subunit A-3-like [Chenopodium quinoa]
miR169h_2	XM_021864800.1	3	2	nuclear transcription factor Y subunit A-3-like [Chenopodium quinoa]
miR408b_1	XM_021865275.1	3	2	laccase-3-like [Chenopodium quinoa]
miR1436	XM_021865473.1	3.5	2	filament-like plant protein 4 isoform X1 [Chenopodium quinoa]
miR156e_1	XM_021867382.1	3	1.5	squamosa promoter-binding-like protein 13A [Chenopodium quinoa]
miR156e_1	XM_021867383.1	3	1.5	squamosa promoter-binding-like protein 13A [Chenopodium quinoa]
miR156e_1	XM_021867384.1	3	1.5	squamosa promoter-binding-like protein 13A [Chenopodium quinoa]
miR156e_1	XM_021867403.1	3	1.5	squamosa promoter-binding-like protein 2 [Chenopodium quinoa]
miR156e_1	XM_021867404.1	3	1.5	squamosa promoter-binding-like protein 2 [Chenopodium quinoa]
miR156e_1	XM_021868311.1	3	1.5	squamosa promoter-binding-like protein 17 isoform X1 [Chenopodium quinoa]
miR156e_1	XM_021868312.1	3	1.5	squamosa promoter-binding-like protein 17 isoform X2 [Chenopodium quinoa]
miR172b-5p_3	XM_021868324.1	3.5	2	vegetative cell wall protein gp1-like [Chenopodium quinoa]
miR172d-5p	XM_021868324.1	2.5	2	vegetative cell wall protein gp1-like [Chenopodium quinoa]
miR172d-5p_4	XM_021868324.1	3.5	2	vegetative cell wall protein gp1-like [Chenopodium quinoa]
miR396h	XM_021868847.1	3.5	2	transcription initiation factor TFIID subunit 6-like isoform X1 [Chenopodium quinoa]
miR396h	XM_021868848.1	3.5	2	transcription initiation factor TFIID subunit 6-like isoform X1 [Chenopodium quinoa]
miR172d-5p	XM_021869487.1	3	2	chaperonin CPN60, mitochondrial [Spinacia oleracea]
miR1436	XM_021870202.1	2	1.5	activating signal cointegrator 1-like [Chenopodium quinoa]
miR1436	XM_021870575.1	2.5	1.5	pentatricopeptide repeat-containing protein At1g55890, mitochondrial-like [Chenopodium quinoa]
miR156e_1	XM_021870788.1	2	1	squamosa promoter-binding protein 1-like isoform X1 [Chenopodium quinoa]
miR156e_1	XM_021870789.1	2	1	squamosa promoter-binding protein 1-like isoform X2 [Chenopodium quinoa]
miR408b_1	XM_021871621.1	2	1.5	uclacyanin-2-like [Chenopodium quinoa]
miR156e_1	XM_021871804.1	3	1.5	squamosa promoter-binding-like protein 16 [Chenopodium quinoa]
miR319a	XM_021872930.1	2.5	2.5	uncharacterized protein LOC110695702 [Chenopodium quinoa]
miR172a_3	XM_021874129.1	3.5	2.2	uncharacterized protein LOC110696272 isoform X1 [Chenopodium quinoa]
miR172d-5p_4	XM_021874940.1	3.5	2.5	DDB1- and CUL4-associated factor 8 [Chenopodium quinoa]
miR172d-5p_4	XM_021874941.1	3.5	2.5	DDB1- and CUL4-associated factor 8 [Chenopodium quinoa]
miR172d-5p_4	XM_021874942.1	3.5	2.5	DDB1- and CUL4-associated factor 8 [Chenopodium quinoa]
miR156e_1	XM_021875189.1	3	1.5	squamosa promoter-binding-like protein 18 isoform X1 [Chenopodium quinoa]
miR156e_1	XM_021875197.1	3	1.5	squamosa promoter-binding-like protein 18 isoform X2 [Chenopodium quinoa]
miR156e_1	XM_021875206.1	3	1.5	squamosa promoter-binding-like protein 18 isoform X1 [Chenopodium quinoa]
miR1436	XM_021876288.1	3	1.8	cytosolic sulfotransferase 15-like [Chenopodium quinoa]
miR396h	XM_021877045.1	2.5	1.8	uncharacterized protein LOC110699556 isoform X1 [Chenopodium quinoa]
miR396h	XM_021877046.1	2.5	1.8	uncharacterized protein LOC110699556 isoform X1 [Chenopodium quinoa]
miR396h	XM_021877047.1	2.5	1.8	uncharacterized protein LOC110699556 isoform X1 [Chenopodium quinoa]
miR396h	XM_021877048.1	2.5	1.8	uncharacterized protein LOC110699556 isoform X1 [Chenopodium quinoa]
miR396h	XM_021877049.1	2.5	1.8	uncharacterized protein LOC110699556 isoform X1 [Chenopodium quinoa]
miR396h	XM_021877050.1	2.5	1.8	uncharacterized protein LOC110699556 isoform X2 [Chenopodium quinoa]
miR396h	XM_021877051.1	2.5	1.8	uncharacterized protein LOC110699556 isoform X2 [Chenopodium quinoa]
miR396h	XM_021877052.1	2.5	1.8	uncharacterized protein LOC110699556 isoform X2 [Chenopodium quinoa]
miR396h	XM_021877053.1	2.5	1.8	uncharacterized protein LOC110699556 isoform X2 [Chenopodium quinoa]
miR319a	XM_021878602.1	3	1.5	transcription factor GAMYB-like [Chenopodium quinoa]
miR319a	XM_021878603.1	3	1.5	transcription factor GAMYB-like [Chenopodium quinoa]
miR319a	XM_021878604.1	3	1.5	transcription factor GAMYB-like [Chenopodium quinoa]
miR396h	XM_021879544.1	3	1.8	transcription initiation factor TFIID subunit 6-like isoform X1 [Chenopodium quinoa]
miR396h	XM_021879545.1	3	1.8	transcription initiation factor TFIID subunit 6-like isoform X1 [Chenopodium quinoa]
miR396h	XM_021879546.1	3	1.8	transcription initiation factor TFIID subunit 6-like isoform X1 [Chenopodium quinoa]
miR319a	XM_021879550.1	3.5	2.5	putative BPI/LBP family protein At1g04970 isoform X1 [Chenopodium quinoa]
miR319a	XM_021879551.1	3.5	2.5	putative BPI/LBP family protein At1g04970 isoform X1 [Chenopodium quinoa]
miR827a	XM_021880233.1	2	1	SPX domain-containing membrane protein At4g22990-like [Chenopodium quinoa]
miR396h	XM_021880792.1	2.5	1.8	uncharacterized protein LOC110703037 [Chenopodium quinoa]
miR396h	XM_021880793.1	2.5	1.8	uncharacterized protein LOC110703037 [Chenopodium quinoa]
miR396h	XM_021880794.1	2.5	1.8	uncharacterized protein LOC110703037 [Chenopodium quinoa]
miR396h	XM_021880795.1	2.5	1.8	uncharacterized protein LOC110703037 [Chenopodium quinoa]
miR396h	XM_021880796.1	2.5	1.8	uncharacterized protein LOC110703037 [Chenopodium quinoa]
miR166a-3p	XM_021881599.1	2.5	1.2	PREDICTED: homeobox-leucine zipper protein ATHB-8 [Beta vulgaris subsp. vulgaris]
miR166e-3p	XM_021881599.1	3	1.5	PREDICTED: homeobox-leucine zipper protein ATHB-8 [Beta vulgaris subsp. vulgaris]
miR166h-3p	XM_021881599.1	1.5	0.8	PREDICTED: homeobox-leucine zipper protein ATHB-8 [Beta vulgaris subsp. vulgaris]
miR166k	XM_021881599.1	1.5	0.8	PREDICTED: homeobox-leucine zipper protein ATHB-8 [Beta vulgaris subsp. vulgaris]
miR166m_2	XM_021881599.1	2	1	PREDICTED: homeobox-leucine zipper protein ATHB-8 [Beta vulgaris subsp. vulgaris]
miR166a-3p	XM_021881600.1	2.5	1.2	PREDICTED: homeobox-leucine zipper protein ATHB-8 [Beta vulgaris subsp. vulgaris]
miR166e-3p	XM_021881600.1	3	1.5	PREDICTED: homeobox-leucine zipper protein ATHB-8 [Beta vulgaris subsp. vulgaris]
miR166h-3p	XM_021881600.1	1.5	0.8	PREDICTED: homeobox-leucine zipper protein ATHB-8 [Beta vulgaris subsp. vulgaris]
miR166k	XM_021881600.1	1.5	0.8	PREDICTED: homeobox-leucine zipper protein ATHB-8 [Beta vulgaris subsp. vulgaris]
miR166m_2	XM_021881600.1	2	1	PREDICTED: homeobox-leucine zipper protein ATHB-8 [Beta vulgaris subsp. vulgaris]
miR156e_1	XM_021881727.1	2	1.2	putative F-box/LRR-repeat protein At4g15060 [Chenopodium quinoa]
miR156e_1	XM_021881728.1	2	1.2	putative F-box/LRR-repeat protein At4g15060 [Chenopodium quinoa]
miR171d_1	XM_021882454.1	1	0.5	scarecrow-like protein 6 isoform X1 [Chenopodium quinoa]
miR171d_1	XM_021882455.1	1	0.5	scarecrow-like protein 6 isoform X2 [Chenopodium quinoa]
miR166a-3p	XM_021883445.1	2.5	1.2	PREDICTED: homeobox-leucine zipper protein ATHB-8 [Beta vulgaris subsp. vulgaris]
miR166e-3p	XM_021883445.1	3	1.5	PREDICTED: homeobox-leucine zipper protein ATHB-8 [Beta vulgaris subsp. vulgaris]
miR166h-3p	XM_021883445.1	1.5	0.8	PREDICTED: homeobox-leucine zipper protein ATHB-8 [Beta vulgaris subsp. vulgaris]
miR166k	XM_021883445.1	1.5	0.8	PREDICTED: homeobox-leucine zipper protein ATHB-8 [Beta vulgaris subsp. vulgaris]
miR166m_2	XM_021883445.1	2	1	PREDICTED: homeobox-leucine zipper protein ATHB-8 [Beta vulgaris subsp. vulgaris]
miR166a-3p	XM_021883446.1	2.5	1.2	PREDICTED: homeobox-leucine zipper protein ATHB-8 [Beta vulgaris subsp. vulgaris]
miR166e-3p	XM_021883446.1	3	1.5	PREDICTED: homeobox-leucine zipper protein ATHB-8 [Beta vulgaris subsp. vulgaris]
miR166h-3p	XM_021883446.1	1.5	0.8	PREDICTED: homeobox-leucine zipper protein ATHB-8 [Beta vulgaris subsp. vulgaris]
miR166k	XM_021883446.1	1.5	0.8	PREDICTED: homeobox-leucine zipper protein ATHB-8 [Beta vulgaris subsp. vulgaris]
miR166m_2	XM_021883446.1	2	1	PREDICTED: homeobox-leucine zipper protein ATHB-8 [Beta vulgaris subsp. vulgaris]
miR169h_2	XM_021883579.1	3	2	nuclear transcription factor Y subunit A-4-like isoform X1 [Chenopodium quinoa]
miR169h_2	XM_021883580.1	3	2	nuclear transcription factor Y subunit A-4-like isoform X2 [Chenopodium quinoa]
miR169h_2	XM_021883581.1	3	2	nuclear transcription factor Y subunit A-4-like isoform X3 [Chenopodium quinoa]
miR172d-5p	XM_021883627.1	3.5	2.5	glutamine--fructose-6-phosphate aminotransferase [isomerizing] 2-like isoform X1 [Chenopodium quinoa]
miR172d-5p	XM_021883628.1	3.5	2.5	glutamine--fructose-6-phosphate aminotransferase [isomerizing] 2-like isoform X2 [Chenopodium quinoa]
miR172a_3	XM_021883629.1	3.5	2.5	pentatricopeptide repeat-containing protein At5g50390, chloroplastic-like [Chenopodium quinoa]
miR172b-5p_3	XM_021884338.1	3	2.2	serine hydroxymethyltransferase, mitochondrial [Chenopodium quinoa]
miR172d-5p	XM_021884338.1	3	2	serine hydroxymethyltransferase, mitochondrial [Chenopodium quinoa]
miR172d-5p_4	XM_021884338.1	3	2.2	serine hydroxymethyltransferase, mitochondrial [Chenopodium quinoa]
miR172b-5p_3	XM_021884339.1	3	2.2	serine hydroxymethyltransferase, mitochondrial [Chenopodium quinoa]
miR172d-5p	XM_021884339.1	3	2	serine hydroxymethyltransferase, mitochondrial [Chenopodium quinoa]
miR172d-5p_4	XM_021884339.1	3	2.2	serine hydroxymethyltransferase, mitochondrial [Chenopodium quinoa]
miR172b-5p_3	XM_021884340.1	3	2.2	serine hydroxymethyltransferase, mitochondrial [Chenopodium quinoa]
miR172d-5p	XM_021884340.1	3	2	serine hydroxymethyltransferase, mitochondrial [Chenopodium quinoa]
miR172d-5p_4	XM_021884340.1	3	2.2	serine hydroxymethyltransferase, mitochondrial [Chenopodium quinoa]
miR396h	XM_021884740.1	3	2	protein FAR-RED IMPAIRED RESPONSE 1-like [Chenopodium quinoa]
miR396h	XM_021884817.1	3	2	protein FAR-RED IMPAIRED RESPONSE 1-like [Chenopodium quinoa]
miR396h	XM_021884891.1	3	2	protein FAR-RED IMPAIRED RESPONSE 1-like [Chenopodium quinoa]
miR156e_1	XM_021884935.1	2	1	squamosa promoter-binding protein 1-like [Chenopodium quinoa]
miR396h	XM_021886295.1	3.5	2.2	low-temperature-induced cysteine proteinase-like [Chenopodium quinoa]
miR166a-3p	XM_021886386.1	3.5	2.2	beta-1,3-galactosyltransferase 7-like [Chenopodium quinoa]
miR166h-3p	XM_021886386.1	3.5	2.2	beta-1,3-galactosyltransferase 7-like [Chenopodium quinoa]
miR166m_2	XM_021886386.1	3	2	beta-1,3-galactosyltransferase 7-like [Chenopodium quinoa]
miR166a-3p	XM_021886388.1	3.5	2.2	beta-1,3-galactosyltransferase 7-like [Chenopodium quinoa]
miR166h-3p	XM_021886388.1	3.5	2.2	beta-1,3-galactosyltransferase 7-like [Chenopodium quinoa]
miR166m_2	XM_021886388.1	3	2	beta-1,3-galactosyltransferase 7-like [Chenopodium quinoa]
miR172d-5p_4	XM_021887630.1	3.5	1.8	heat stress transcription factor A-3-like isoform X3 [Chenopodium quinoa]
miR172a_3	XM_021888574.1	2	1	AP2-like ethylene-responsive transcription factor TOE3 isoform X1 [Chenopodium quinoa]
miR172a_3	XM_021888575.1	2	1	AP2-like ethylene-responsive transcription factor TOE3 isoform X2 [Chenopodium quinoa]
miR172a_3	XM_021888576.1	2	1	AP2-like ethylene-responsive transcription factor TOE3 isoform X3 [Chenopodium quinoa]
miR172a_3	XM_021888577.1	2	1	ethylene-responsive transcription factor RAP2-7-like isoform X4 [Chenopodium quinoa]
miR172a_3	XM_021888578.1	2	1	ethylene-responsive transcription factor RAP2-7-like isoform X5 [Chenopodium quinoa]
miR408b_1	XM_021889305.1	2	1.5	uclacyanin-2-like [Chenopodium quinoa]
miR156e_1	XM_021889412.1	3	1.5	squamosa promoter-binding-like protein 2 [Chenopodium quinoa]
miR156e_1	XM_021889421.1	3	1.5	squamosa promoter-binding-like protein 2 [Chenopodium quinoa]
miR156e_1	XM_021889619.1	3	1.5	squamosa promoter-binding-like protein 13A [Chenopodium quinoa]
miR166a-3p	XM_021890249.1	3	1.8	homeobox-leucine zipper protein REVOLUTA-like [Chenopodium quinoa]
miR166e-3p	XM_021890249.1	3.5	1.5	homeobox-leucine zipper protein REVOLUTA-like [Chenopodium quinoa]
miR166h-3p	XM_021890249.1	2	1.2	homeobox-leucine zipper protein REVOLUTA-like [Chenopodium quinoa]
miR166k	XM_021890249.1	2	1.2	homeobox-leucine zipper protein REVOLUTA-like [Chenopodium quinoa]
miR166m_2	XM_021890249.1	2.5	1.5	homeobox-leucine zipper protein REVOLUTA-like [Chenopodium quinoa]
miR172a_3	XM_021890360.1	3	1.5	ethylene-responsive transcription factor ERF113-like isoform X1 [Chenopodium quinoa]
miR172a_3	XM_021890366.1	3	1.5	ethylene-responsive transcription factor ERF113-like isoform X2 [Chenopodium quinoa]
miR172b-5p_3	XM_021891997.1	3	2.2	serine hydroxymethyltransferase, mitochondrial-like [Chenopodium quinoa]
miR172d-5p	XM_021891997.1	3	2	serine hydroxymethyltransferase, mitochondrial-like [Chenopodium quinoa]
miR172d-5p_4	XM_021891997.1	3	2.2	serine hydroxymethyltransferase, mitochondrial-like [Chenopodium quinoa]
miR172b-5p_3	XM_021892002.1	3	2.2	serine hydroxymethyltransferase, mitochondrial-like [Chenopodium quinoa]
miR172d-5p	XM_021892002.1	3	2	serine hydroxymethyltransferase, mitochondrial-like [Chenopodium quinoa]
miR172d-5p_4	XM_021892002.1	3	2.2	serine hydroxymethyltransferase, mitochondrial-like [Chenopodium quinoa]
miR172d-5p_4	XM_021893767.1	3	2.5	FT-interacting protein 1-like [Chenopodium quinoa]
miR166a-3p	XM_021894193.1	2.5	1.2	PREDICTED: homeobox-leucine zipper protein ATHB-15 isoform X1 [Beta vulgaris subsp. vulgaris]
miR166e-3p	XM_021894193.1	3	1.5	PREDICTED: homeobox-leucine zipper protein ATHB-15 isoform X1 [Beta vulgaris subsp. vulgaris]
miR166h-3p	XM_021894193.1	1.5	0.8	PREDICTED: homeobox-leucine zipper protein ATHB-15 isoform X1 [Beta vulgaris subsp. vulgaris]
miR166k	XM_021894193.1	1.5	0.8	PREDICTED: homeobox-leucine zipper protein ATHB-15 isoform X1 [Beta vulgaris subsp. vulgaris]
miR166m_2	XM_021894193.1	2	1	PREDICTED: homeobox-leucine zipper protein ATHB-15 isoform X1 [Beta vulgaris subsp. vulgaris]
miR169h_2	XM_021894366.1	2.5	1.8	nuclear transcription factor Y subunit A-7-like isoform X1 [Chenopodium quinoa]
miR169h_2	XM_021894367.1	2.5	1.8	nuclear transcription factor Y subunit A-7-like isoform X1 [Chenopodium quinoa]
miR172d-5p	XM_021894948.1	3	2	PREDICTED: uncharacterized protein LOC104902518 [Beta vulgaris subsp. vulgaris]
miR172d-5p	XM_021894949.1	3	2	PREDICTED: uncharacterized protein LOC104902518 [Beta vulgaris subsp. vulgaris]
miR168a-3p	XM_021894998.1	2	1	uncharacterized protein LOC110716385 [Chenopodium quinoa]
miR172a_3	XM_021895337.1	3	2.5	plant intracellular Ras-group-related LRR protein 6-like [Chenopodium quinoa]
miR172a_3	XM_021895609.1	3	2.5	plant intracellular Ras-group-related LRR protein 6-like [Chenopodium quinoa]
miR172a_3	XM_021897122.1	2	1	floral homeotic protein APETALA 2-like [Chenopodium quinoa]
miR827a	XM_021898466.1	0	0	SPX domain-containing membrane protein At4g22990-like [Chenopodium quinoa]
miR172d-5p	XM_021899612.1	3.5	2.5	kinesin-like protein KIN-6 isoform X1 [Chenopodium quinoa]
miR172d-5p	XM_021899613.1	3.5	2.5	kinesin-like protein KIN-6 isoform X2 [Chenopodium quinoa]
miR172b-5p_3	XM_021899990.1	2.5	2	glucan endo-1,3-beta-glucosidase 14-like [Chenopodium quinoa]
miR172d-5p	XM_021899990.1	3	2.5	glucan endo-1,3-beta-glucosidase 14-like [Chenopodium quinoa]
miR172d-5p_4	XM_021899990.1	3	2	glucan endo-1,3-beta-glucosidase 14-like [Chenopodium quinoa]
miR172a_3	XM_021900042.1	3	2	uncharacterized protein LOC110720943 [Chenopodium quinoa]
miR172d-5p	XM_021900261.1	3.5	2.5	kinesin-like protein KIN-6 [Chenopodium quinoa]
miR156e_1	XM_021900841.1	2	1	squamosa promoter-binding-like protein 6 [Chenopodium quinoa]
miR156e_1	XM_021901492.1	3	1.5	squamosa promoter-binding-like protein 18 isoform X1 [Chenopodium quinoa]
miR156e_1	XM_021901493.1	3	1.5	squamosa promoter-binding-like protein 18 isoform X1 [Chenopodium quinoa]
miR156e_1	XM_021901494.1	3	1.5	teosinte glume architecture 1-like isoform X3 [Chenopodium quinoa]
miR172b-5p_3	XM_021901600.1	3.5	2.5	hypothetical protein SOVF_051220 isoform A [Spinacia oleracea]
miR172d-5p_4	XM_021901600.1	3.5	2.5	hypothetical protein SOVF_051220 isoform A [Spinacia oleracea]
miR171d_1	XM_021902101.1	3	1.5	scarecrow-like protein 15 [Chenopodium quinoa]
miR1436	XM_021902385.1	3.5	1.8	uncharacterized protein LOC110723092 isoform X1 [Chenopodium quinoa]
miR1436	XM_021902386.1	3.5	1.8	uncharacterized protein LOC110723092 isoform X2 [Chenopodium quinoa]
miR172b-5p_3	XM_021903318.1	2.5	2	glucan endo-1,3-beta-glucosidase 14-like [Chenopodium quinoa]
miR172d-5p	XM_021903318.1	3	2.5	glucan endo-1,3-beta-glucosidase 14-like [Chenopodium quinoa]
miR172d-5p_4	XM_021903318.1	3	2	glucan endo-1,3-beta-glucosidase 14-like [Chenopodium quinoa]
miR172d-5p_4	XM_021904428.1	3	1.5	TSL-kinase interacting protein 1-like isoform X1 [Chenopodium quinoa]
miR172d-5p_4	XM_021904429.1	3	1.5	TSL-kinase interacting protein 1-like isoform X2 [Chenopodium quinoa]
miR172d-5p_4	XM_021904430.1	3	1.5	TSL-kinase interacting protein 1-like isoform X3 [Chenopodium quinoa]
miR172d-5p	XM_021904438.1	3.5	2.5	uncharacterized protein LOC110724956 isoform X1 [Chenopodium quinoa]
miR172d-5p	XM_021904439.1	3.5	2.5	uncharacterized protein LOC110724956 isoform X2 [Chenopodium quinoa]
miR172d-5p	XM_021905206.1	3.5	2	uncharacterized protein LOC110725738 isoform X1 [Chenopodium quinoa]
miR172d-5p	XM_021905207.1	3.5	2	uncharacterized protein LOC110725738 isoform X2 [Chenopodium quinoa]
miR172d-5p	XM_021905208.1	3.5	2	uncharacterized protein LOC110725738 isoform X3 [Chenopodium quinoa]
miR408b_1	XM_021905246.1	1.5	0.8	basic blue protein-like [Chenopodium quinoa]
miR172d-5p	XM_021905417.1	3	2	clp protease adapter protein ClpF, chloroplastic-like [Chenopodium quinoa]
miR172d-5p	XM_021905418.1	3	2	clp protease adapter protein ClpF, chloroplastic-like [Chenopodium quinoa]
miR172b-5p_3	XM_021906183.1	3.5	2.5	putative pentatricopeptide repeat-containing protein At1g77010, mitochondrial [Chenopodium quinoa]
miR172d-5p	XM_021906183.1	3	2	putative pentatricopeptide repeat-containing protein At1g77010, mitochondrial [Chenopodium quinoa]
miR172d-5p_4	XM_021906183.1	3.5	2.5	putative pentatricopeptide repeat-containing protein At1g77010, mitochondrial [Chenopodium quinoa]
miR172b-5p_3	XM_021906184.1	3.5	2.5	putative pentatricopeptide repeat-containing protein At1g77010, mitochondrial [Chenopodium quinoa]
miR172d-5p	XM_021906184.1	3	2	putative pentatricopeptide repeat-containing protein At1g77010, mitochondrial [Chenopodium quinoa]
miR172d-5p_4	XM_021906184.1	3.5	2.5	putative pentatricopeptide repeat-containing protein At1g77010, mitochondrial [Chenopodium quinoa]
miR172d-5p	XM_021906932.1	3	2	chaperonin CPN60, mitochondrial [Spinacia oleracea]
miR396h	XM_021907822.1	3.5	1.8	probable transmembrane ascorbate ferrireductase 2 [Chenopodium quinoa]
miR166a-3p	XM_021909638.1	2.5	1.2	PREDICTED: homeobox-leucine zipper protein ATHB-15 isoform X1 [Beta vulgaris subsp. vulgaris]
miR166e-3p	XM_021909638.1	3	1.5	PREDICTED: homeobox-leucine zipper protein ATHB-15 isoform X1 [Beta vulgaris subsp. vulgaris]
miR166h-3p	XM_021909638.1	1.5	0.8	PREDICTED: homeobox-leucine zipper protein ATHB-15 isoform X1 [Beta vulgaris subsp. vulgaris]
miR166k	XM_021909638.1	1.5	0.8	PREDICTED: homeobox-leucine zipper protein ATHB-15 isoform X1 [Beta vulgaris subsp. vulgaris]
miR166m_2	XM_021909638.1	2	1	PREDICTED: homeobox-leucine zipper protein ATHB-15 isoform X1 [Beta vulgaris subsp. vulgaris]
miR167c_1	XM_021911394.1	2.5	1.5	protein PAIR1-like isoform X2 [Chenopodium quinoa]
miR396h	XM_021911995.1	3	2.2	uncharacterized protein LOC110732080 isoform X1 [Chenopodium quinoa]
miR396h	XM_021912003.1	3	2.2	uncharacterized protein LOC110732080 isoform X1 [Chenopodium quinoa]
miR396h	XM_021912012.1	3	2.2	uncharacterized protein LOC110732080 isoform X1 [Chenopodium quinoa]
miR396h	XM_021912018.1	3	2.2	uncharacterized protein LOC110732080 isoform X1 [Chenopodium quinoa]
miR396h	XM_021912025.1	3	2.2	uncharacterized protein LOC110732080 isoform X3 [Chenopodium quinoa]
miR171d_1	XM_021912768.1	1	0.5	scarecrow-like protein 6 isoform X1 [Chenopodium quinoa]
miR171d_1	XM_021912769.1	1	0.5	scarecrow-like protein 6 isoform X2 [Chenopodium quinoa]
miR319a	XM_021913218.1	3	2.5	uncharacterized protein LOC110733208 isoform X1 [Chenopodium quinoa]
miR172b-5p_3	XM_021913329.1	3.5	2.5	hypothetical protein SOVF_051220 isoform B [Spinacia oleracea]
miR172d-5p_4	XM_021913329.1	3.5	2.5	hypothetical protein SOVF_051220 isoform B [Spinacia oleracea]
miR319a	XM_021914082.1	1.5	2.5	uncharacterized protein LOC110733208 isoform X2 [Chenopodium quinoa]
miR156e_1	XM_021914710.1	3	1.5	squamosa promoter-binding-like protein 17 [Chenopodium quinoa]
miR408b_1	XM_021915984.1	1.5	0.8	basic blue protein-like [Chenopodium quinoa]
miR319a	XM_021916555.1	3	1.5	transcription factor GAMYB-like [Chenopodium quinoa]
miR319a	XM_021916556.1	3	1.5	transcription factor GAMYB-like [Chenopodium quinoa]
miR166a-3p	XM_021917625.1	3	1.8	homeobox-leucine zipper protein REVOLUTA-like [Chenopodium quinoa]
miR166e-3p	XM_021917625.1	3.5	1.5	homeobox-leucine zipper protein REVOLUTA-like [Chenopodium quinoa]
miR166h-3p	XM_021917625.1	2	1.2	homeobox-leucine zipper protein REVOLUTA-like [Chenopodium quinoa]
miR166k	XM_021917625.1	2	1.2	homeobox-leucine zipper protein REVOLUTA-like [Chenopodium quinoa]
miR166m_2	XM_021917625.1	2.5	1.5	homeobox-leucine zipper protein REVOLUTA-like [Chenopodium quinoa]
miR1436	XM_021918797.1	2.5	1.5	nudix hydrolase 16, mitochondrial-like [Chenopodium quinoa]
miR172d-5p_4	XM_021918834.1	3.5	2	TSL-kinase interacting protein 1-like isoform X1 [Chenopodium quinoa]
miR172d-5p_4	XM_021918835.1	3.5	2	TSL-kinase interacting protein 1-like isoform X2 [Chenopodium quinoa]
miR172d-5p_4	XM_021918836.1	3.5	2	TSL-kinase interacting protein 1-like isoform X3 [Chenopodium quinoa]
miR172d-5p_4	XM_021918837.1	3.5	2	TSL-kinase interacting protein 1-like isoform X4 [Chenopodium quinoa]
miR172b-5p_3	XR_002503580.1	3.5	2.5	uncharacterized protein LOC110719101 [Chenopodium quinoa]
miR172d-5p_4	XR_002503580.1	3.5	2.5	uncharacterized protein LOC110719101 [Chenopodium quinoa]
miR1436	XR_002505039.1	3.5	2	-
miR1436	XR_002505454.1	3	1.5	uncharacterized protein LOC110777470, partial [Spinacia oleracea]
miR156e_1	XR_002507799.1	2	1.2	putative F-box/LRR-repeat protein At4g15060 [Chenopodium quinoa]
miR156e_1	XR_002507800.1	2	1.2	putative F-box/LRR-repeat protein At4g15060 [Chenopodium quinoa]
miR156e_1	XR_002507830.1	3	1.5	-
miR156e_1	XR_002508412.1	2	1	squamosa promoter-binding protein 1-like [Chenopodium quinoa]
miR1436	XR_002509105.1	3.5	2	U-box domain-containing protein 33-like isoform X1 [Chenopodium quinoa]
miR1436	XR_002509106.1	3.5	2	U-box domain-containing protein 33-like isoform X2 [Chenopodium quinoa]
miR1436	XR_002509107.1	3.5	2	U-box domain-containing protein 33-like isoform X1 [Chenopodium quinoa]
miR1436	XR_002509108.1	3.5	2	U-box domain-containing protein 33-like isoform X2 [Chenopodium quinoa]
miR1436	XR_002509109.1	3.5	2	U-box domain-containing protein 33-like isoform X1 [Chenopodium quinoa]
miR1436	XR_002509110.1	3.5	2	U-box domain-containing protein 33-like isoform X1 [Chenopodium quinoa]
miR168a-3p	XR_002510478.1	2	1	uncharacterized protein LOC110716385 [Chenopodium quinoa]
miR156e_1	XR_002511558.1	3	1.5	squamosa promoter-binding-like protein 18 isoform X1 [Chenopodium quinoa]
miR169h_2	XR_002511881.1	3	2	nuclear transcription factor Y subunit A-4-like isoform X3 [Chenopodium quinoa]
miR172d-5p	XR_002512092.1	3.5	2.5	uncharacterized protein LOC110724956 isoform X1 [Chenopodium quinoa]
miR396a-3p	XR_002512198.1	0.5	0.2	-
miR396h	XR_002512198.1	3	1.5	-
miR169h_2	XR_002512657.1	3	2	nuclear transcription factor Y subunit A-4-like isoform X3 [Chenopodium quinoa]
miR167c_1	XR_002512788.1	3	1.5	-
miR396h	XR_002513431.1	3	2.2	uncharacterized protein LOC110732080 isoform X1 [Chenopodium quinoa]
miR827a	XR_002514644.1	0	0	-

## Sheet: alkaline only
miRNA id	Target id	TargetFinder score	psRobot score	NR description
miR1436	XM_021862925.1	3	1.5	uncharacterized protein LOC110686333 isoform X1 [Chenopodium quinoa]
miR1436	XM_021862929.1	3	1.5	uncharacterized protein LOC110686333 isoform X1 [Chenopodium quinoa]
miR1436	XM_021862933.1	3	1.5	uncharacterized protein LOC110686333 isoform X1 [Chenopodium quinoa]
miR1436	XM_021862940.1	3	1.5	uncharacterized protein LOC110686333 isoform X2 [Chenopodium quinoa]
miR1436	XM_021865473.1	3.5	2	filament-like plant protein 4 isoform X1 [Chenopodium quinoa]
miR1436	XM_021870202.1	2	1.5	activating signal cointegrator 1-like [Chenopodium quinoa]
miR1436	XM_021870575.1	2.5	1.5	pentatricopeptide repeat-containing protein At1g55890, mitochondrial-like [Chenopodium quinoa]
miR1436	XM_021876288.1	3	1.8	cytosolic sulfotransferase 15-like [Chenopodium quinoa]
miR1436	XM_021902385.1	3.5	1.8	uncharacterized protein LOC110723092 isoform X1 [Chenopodium quinoa]
miR1436	XM_021902386.1	3.5	1.8	uncharacterized protein LOC110723092 isoform X2 [Chenopodium quinoa]
miR1436	XM_021918797.1	2.5	1.5	nudix hydrolase 16, mitochondrial-like [Chenopodium quinoa]
miR1436	XR_002505039.1	3.5	2	-
miR1436	XR_002505454.1	3	1.5	uncharacterized protein LOC110777470, partial [Spinacia oleracea]
miR1436	XR_002509105.1	3.5	2	U-box domain-containing protein 33-like isoform X1 [Chenopodium quinoa]
miR1436	XR_002509106.1	3.5	2	U-box domain-containing protein 33-like isoform X2 [Chenopodium quinoa]
miR1436	XR_002509107.1	3.5	2	U-box domain-containing protein 33-like isoform X1 [Chenopodium quinoa]
miR1436	XR_002509108.1	3.5	2	U-box domain-containing protein 33-like isoform X2 [Chenopodium quinoa]
miR1436	XR_002509109.1	3.5	2	U-box domain-containing protein 33-like isoform X1 [Chenopodium quinoa]
miR1436	XR_002509110.1	3.5	2	U-box domain-containing protein 33-like isoform X1 [Chenopodium quinoa]
miR156_2	XM_021857955.1	2	1	squamosa promoter-binding-like protein 16 isoform X1 [Chenopodium quinoa]
miR156_2	XM_021857956.1	2	1	squamosa promoter-binding-like protein 16 isoform X2 [Chenopodium quinoa]
miR156_2	XM_021862675.1	2.5	1.2	squamosa promoter-binding-like protein 6 isoform X1 [Chenopodium quinoa]
miR156_2	XM_021862676.1	2.5	1.2	squamosa promoter-binding-like protein 6 isoform X2 [Chenopodium quinoa]
miR156_2	XM_021866222.1	3.5	2	chromatin modification-related protein MEAF6-like isoform X1 [Chenopodium quinoa]
miR156_2	XM_021867382.1	3	1.5	squamosa promoter-binding-like protein 13A [Chenopodium quinoa]
miR156_2	XM_021867383.1	3	1.5	squamosa promoter-binding-like protein 13A [Chenopodium quinoa]
miR156_2	XM_021867384.1	3	1.5	squamosa promoter-binding-like protein 13A [Chenopodium quinoa]
miR156_2	XM_021867403.1	2	1	squamosa promoter-binding-like protein 2 [Chenopodium quinoa]
miR156_2	XM_021867404.1	2	1	squamosa promoter-binding-like protein 2 [Chenopodium quinoa]
miR156_2	XM_021868311.1	2	1	squamosa promoter-binding-like protein 17 isoform X1 [Chenopodium quinoa]
miR156_2	XM_021868312.1	2	1	squamosa promoter-binding-like protein 17 isoform X2 [Chenopodium quinoa]
miR156_2	XM_021870788.1	0	0	squamosa promoter-binding protein 1-like isoform X1 [Chenopodium quinoa]
miR156_2	XM_021870789.1	0	0	squamosa promoter-binding protein 1-like isoform X2 [Chenopodium quinoa]
miR156_2	XM_021871804.1	2	1	squamosa promoter-binding-like protein 16 [Chenopodium quinoa]
miR156_2	XM_021875189.1	3	1.5	squamosa promoter-binding-like protein 18 isoform X1 [Chenopodium quinoa]
miR156_2	XM_021875197.1	3	1.5	squamosa promoter-binding-like protein 18 isoform X2 [Chenopodium quinoa]
miR156_2	XM_021875206.1	3	1.5	squamosa promoter-binding-like protein 18 isoform X1 [Chenopodium quinoa]
miR156_2	XM_021877549.1	3.5	1.8	1-(5-phosphoribosyl)-5-[(5-phosphoribosylamino)methylideneamino] imidazole-4-carboxamide isomerase, chloroplastic-like isoform X1 [Chenopodium quinoa]
miR156_2	XM_021877550.1	3.5	1.8	1-(5-phosphoribosyl)-5-[(5-phosphoribosylamino)methylideneamino] imidazole-4-carboxamide isomerase, chloroplastic-like isoform X2 [Chenopodium quinoa]
miR156_2	XM_021881727.1	3	1.5	putative F-box/LRR-repeat protein At4g15060 [Chenopodium quinoa]
miR156_2	XM_021881728.1	3	1.5	putative F-box/LRR-repeat protein At4g15060 [Chenopodium quinoa]
miR156_2	XM_021884935.1	0	0	squamosa promoter-binding protein 1-like [Chenopodium quinoa]
miR156_2	XM_021889412.1	2	1	squamosa promoter-binding-like protein 2 [Chenopodium quinoa]
miR156_2	XM_021889421.1	2	1	squamosa promoter-binding-like protein 2 [Chenopodium quinoa]
miR156_2	XM_021889619.1	3	1.5	squamosa promoter-binding-like protein 13A [Chenopodium quinoa]
miR156_2	XM_021893196.1	3.5	2	mediator of RNA polymerase II transcription subunit 12-like [Chenopodium quinoa]
miR156_2	XM_021893197.1	3.5	2	mediator of RNA polymerase II transcription subunit 12-like [Chenopodium quinoa]
miR156_2	XM_021896366.1	3.5	2	chromatin modification-related protein MEAF6-like isoform X1 [Chenopodium quinoa]
miR156_2	XM_021896367.1	3.5	2	chromatin modification-related protein MEAF6-like isoform X2 [Chenopodium quinoa]
miR156_2	XM_021900841.1	2.5	1.2	squamosa promoter-binding-like protein 6 [Chenopodium quinoa]
miR156_2	XM_021901492.1	3	1.5	squamosa promoter-binding-like protein 18 isoform X1 [Chenopodium quinoa]
miR156_2	XM_021901493.1	3	1.5	squamosa promoter-binding-like protein 18 isoform X1 [Chenopodium quinoa]
miR156_2	XM_021901494.1	3	1.5	teosinte glume architecture 1-like isoform X3 [Chenopodium quinoa]
miR156_2	XM_021908323.1	3.5	2	uncharacterized protein LOC110728681 [Chenopodium quinoa]
miR156_2	XM_021908976.1	3	1.5	interactor of constitutive active ROPs 4-like [Chenopodium quinoa]
miR156_2	XM_021908977.1	3	1.5	interactor of constitutive active ROPs 4-like [Chenopodium quinoa]
miR156_2	XM_021911384.1	3.5	2	mediator of RNA polymerase II transcription subunit 12-like [Chenopodium quinoa]
miR156_2	XM_021911385.1	3.5	2	mediator of RNA polymerase II transcription subunit 12-like [Chenopodium quinoa]
miR156_2	XM_021911386.1	3.5	2	mediator of RNA polymerase II transcription subunit 12-like [Chenopodium quinoa]
miR156_2	XM_021911387.1	3.5	2	mediator of RNA polymerase II transcription subunit 12-like [Chenopodium quinoa]
miR156_2	XM_021911388.1	3.5	2	mediator of RNA polymerase II transcription subunit 12-like [Chenopodium quinoa]
miR156_2	XM_021914403.1	2.5	1.2	DNA mismatch repair protein MSH6-like isoform X1 [Chenopodium quinoa]
miR156_2	XM_021914404.1	2.5	1.2	DNA mismatch repair protein MSH6-like isoform X2 [Chenopodium quinoa]
miR156_2	XM_021914710.1	2	1	squamosa promoter-binding-like protein 17 [Chenopodium quinoa]
miR156_2	XM_021920154.1	3.5	2.2	gamma carbonic anhydrase-like 2, mitochondrial [Chenopodium quinoa]
miR156_2	XR_002507799.1	3	1.5	putative F-box/LRR-repeat protein At4g15060 [Chenopodium quinoa]
miR156_2	XR_002507800.1	3	1.5	putative F-box/LRR-repeat protein At4g15060 [Chenopodium quinoa]
miR156_2	XR_002507830.1	3	1.5	-
miR156_2	XR_002508412.1	0	0	squamosa promoter-binding protein 1-like [Chenopodium quinoa]
miR156_2	XR_002511558.1	3	1.5	squamosa promoter-binding-like protein 18 isoform X1 [Chenopodium quinoa]
miR156h_1	XM_021857955.1	2	1	squamosa promoter-binding-like protein 16 isoform X1 [Chenopodium quinoa]
miR156h_1	XM_021857956.1	2	1	squamosa promoter-binding-like protein 16 isoform X2 [Chenopodium quinoa]
miR156h_1	XM_021862675.1	2	1	squamosa promoter-binding-like protein 6 isoform X1 [Chenopodium quinoa]
miR156h_1	XM_021862676.1	2	1	squamosa promoter-binding-like protein 6 isoform X2 [Chenopodium quinoa]
miR156h_1	XM_021867382.1	2	1	squamosa promoter-binding-like protein 13A [Chenopodium quinoa]
miR156h_1	XM_021867383.1	2	1	squamosa promoter-binding-like protein 13A [Chenopodium quinoa]
miR156h_1	XM_021867384.1	2	1	squamosa promoter-binding-like protein 13A [Chenopodium quinoa]
miR156h_1	XM_021867403.1	2	1	squamosa promoter-binding-like protein 2 [Chenopodium quinoa]
miR156h_1	XM_021867404.1	2	1	squamosa promoter-binding-like protein 2 [Chenopodium quinoa]
miR156h_1	XM_021868311.1	2	1	squamosa promoter-binding-like protein 17 isoform X1 [Chenopodium quinoa]
miR156h_1	XM_021868312.1	2	1	squamosa promoter-binding-like protein 17 isoform X2 [Chenopodium quinoa]
miR156h_1	XM_021870788.1	3	1.5	squamosa promoter-binding protein 1-like isoform X1 [Chenopodium quinoa]
miR156h_1	XM_021870789.1	3	1.5	squamosa promoter-binding protein 1-like isoform X2 [Chenopodium quinoa]
miR156h_1	XM_021871804.1	2	1	squamosa promoter-binding-like protein 16 [Chenopodium quinoa]
miR156h_1	XM_021873594.1	3.5	2	leucine-rich repeat extensin-like protein 4 [Chenopodium quinoa]
miR156h_1	XM_021875189.1	2	1	squamosa promoter-binding-like protein 18 isoform X1 [Chenopodium quinoa]
miR156h_1	XM_021875197.1	2	1	squamosa promoter-binding-like protein 18 isoform X2 [Chenopodium quinoa]
miR156h_1	XM_021875206.1	2	1	squamosa promoter-binding-like protein 18 isoform X1 [Chenopodium quinoa]
miR156h_1	XM_021884935.1	3	1.5	squamosa promoter-binding protein 1-like [Chenopodium quinoa]
miR156h_1	XM_021888555.1	3.5	2	leucine-rich repeat extensin-like protein 4 [Chenopodium quinoa]
miR156h_1	XM_021889412.1	2	1	squamosa promoter-binding-like protein 2 [Chenopodium quinoa]
miR156h_1	XM_021889421.1	2	1	squamosa promoter-binding-like protein 2 [Chenopodium quinoa]
miR156h_1	XM_021889619.1	2	1	squamosa promoter-binding-like protein 13A [Chenopodium quinoa]
miR156h_1	XM_021900841.1	2	1	squamosa promoter-binding-like protein 6 [Chenopodium quinoa]
miR156h_1	XM_021901492.1	2	1	squamosa promoter-binding-like protein 18 isoform X1 [Chenopodium quinoa]
miR156h_1	XM_021901493.1	2	1	squamosa promoter-binding-like protein 18 isoform X1 [Chenopodium quinoa]
miR156h_1	XM_021901494.1	2	1	teosinte glume architecture 1-like isoform X3 [Chenopodium quinoa]
miR156h_1	XM_021907748.1	3.5	2.5	probable serine/threonine-protein kinase PBL26, partial [Chenopodium quinoa]
miR156h_1	XM_021911750.1	3.5	2.5	probable serine/threonine-protein kinase PBL26, partial [Chenopodium quinoa]
miR156h_1	XM_021914710.1	2	1	squamosa promoter-binding-like protein 17 [Chenopodium quinoa]
miR156h_1	XM_021918899.1	3.5	1.8	uncharacterized protein LOC110738486 [Chenopodium quinoa]
miR156h_1	XR_002506975.1	3.5	2.5	uncharacterized protein LOC110739698 isoform X1 [Chenopodium quinoa]
miR156h_1	XR_002508412.1	3	1.5	squamosa promoter-binding protein 1-like [Chenopodium quinoa]
miR156h_1	XR_002511558.1	2	1	squamosa promoter-binding-like protein 18 isoform X1 [Chenopodium quinoa]
miR156h_1	XR_002512246.1	3.5	2.5	-
miR156h_1	XR_002513149.1	3.5	2.5	-
miR160b_1	XM_021866782.1	0.5	0.5	auxin response factor 17-like [Chenopodium quinoa]
miR160b_1	XM_021874932.1	0.5	0.5	auxin response factor 18-like [Chenopodium quinoa]
miR160b_1	XM_021877437.1	0.5	0.5	auxin response factor 17-like [Chenopodium quinoa]
miR160b_1	XM_021892663.1	0.5	0.5	auxin response factor 17-like [Chenopodium quinoa]
miR160b_1	XM_021904434.1	0.5	0.5	auxin response factor 18-like [Chenopodium quinoa]
miR160b_1	XM_021904791.1	0.5	0.5	auxin response factor 17-like [Chenopodium quinoa]
miR160b_1	XM_021915345.1	1	0.8	auxin response factor 18-like [Chenopodium quinoa]
miR160b_1	XM_021915346.1	1	0.8	auxin response factor 18-like [Chenopodium quinoa]
miR160b_1	XM_021919419.1	1	0.8	auxin response factor 18-like [Chenopodium quinoa]
miR166	XM_021881599.1	3.5	1.8	PREDICTED: homeobox-leucine zipper protein ATHB-8 [Beta vulgaris subsp. vulgaris]
miR166	XM_021881600.1	3.5	1.8	PREDICTED: homeobox-leucine zipper protein ATHB-8 [Beta vulgaris subsp. vulgaris]
miR166	XM_021883445.1	3.5	1.8	PREDICTED: homeobox-leucine zipper protein ATHB-8 [Beta vulgaris subsp. vulgaris]
miR166	XM_021883446.1	3.5	1.8	PREDICTED: homeobox-leucine zipper protein ATHB-8 [Beta vulgaris subsp. vulgaris]
miR166	XM_021886386.1	3.5	2.2	beta-1,3-galactosyltransferase 7-like [Chenopodium quinoa]
miR166	XM_021886388.1	3.5	2.2	beta-1,3-galactosyltransferase 7-like [Chenopodium quinoa]
miR166	XM_021894193.1	3.5	1.8	PREDICTED: homeobox-leucine zipper protein ATHB-15 isoform X1 [Beta vulgaris subsp. vulgaris]
miR166	XM_021909638.1	3.5	1.8	PREDICTED: homeobox-leucine zipper protein ATHB-15 isoform X1 [Beta vulgaris subsp. vulgaris]
miR166a	XM_021881599.1	0.5	0.2	PREDICTED: homeobox-leucine zipper protein ATHB-8 [Beta vulgaris subsp. vulgaris]
miR166a	XM_021881600.1	0.5	0.2	PREDICTED: homeobox-leucine zipper protein ATHB-8 [Beta vulgaris subsp. vulgaris]
miR166a	XM_021883445.1	0.5	0.2	PREDICTED: homeobox-leucine zipper protein ATHB-8 [Beta vulgaris subsp. vulgaris]
miR166a	XM_021883446.1	0.5	0.2	PREDICTED: homeobox-leucine zipper protein ATHB-8 [Beta vulgaris subsp. vulgaris]
miR166a	XM_021886386.1	3.5	2.2	beta-1,3-galactosyltransferase 7-like [Chenopodium quinoa]
miR166a	XM_021886388.1	3.5	2.2	beta-1,3-galactosyltransferase 7-like [Chenopodium quinoa]
miR166a	XM_021890249.1	1	0.8	homeobox-leucine zipper protein REVOLUTA-like [Chenopodium quinoa]
miR166a	XM_021894193.1	0.5	0.2	PREDICTED: homeobox-leucine zipper protein ATHB-15 isoform X1 [Beta vulgaris subsp. vulgaris]
miR166a	XM_021909638.1	0.5	0.2	PREDICTED: homeobox-leucine zipper protein ATHB-15 isoform X1 [Beta vulgaris subsp. vulgaris]
miR166a	XM_021917625.1	1	0.8	homeobox-leucine zipper protein REVOLUTA-like [Chenopodium quinoa]
miR166a	XR_002514518.1	3.5	2.5	uncharacterized protein LOC110700074 isoform X1 [Chenopodium quinoa]
miR166a	XR_002514519.1	3.5	2.5	uncharacterized protein LOC110700074 isoform X1 [Chenopodium quinoa]
miR166h-5p	XM_021869718.1	2.5	2.2	receptor kinase-like protein Xa21 [Chenopodium quinoa]
miR166h-5p	XM_021903005.1	2.5	2.2	receptor kinase-like protein Xa21 [Chenopodium quinoa]
miR167d_1	XM_021863533.1	3	2.5	DNA-directed RNA polymerase V subunit 7-like [Chenopodium quinoa]
miR167d_1	XM_021911394.1	2.5	1.5	protein PAIR1-like isoform X2 [Chenopodium quinoa]
miR167d_1	XR_002512788.1	2	1	-
miR319_1	XM_021861725.1	2.5	2.2	transcription factor TCP4-like [Chenopodium quinoa]
miR319_1	XM_021863548.1	3.5	2.5	RNA exonuclease 4-like [Chenopodium quinoa]
miR319_1	XM_021872930.1	3.5	2	uncharacterized protein LOC110695702 [Chenopodium quinoa]
miR319_1	XM_021878602.1	2	1	transcription factor GAMYB-like [Chenopodium quinoa]
miR319_1	XM_021878603.1	2	1	transcription factor GAMYB-like [Chenopodium quinoa]
miR319_1	XM_021878604.1	2	1	transcription factor GAMYB-like [Chenopodium quinoa]
miR319_1	XM_021879550.1	3	2	putative BPI/LBP family protein At1g04970 isoform X1 [Chenopodium quinoa]
miR319_1	XM_021879551.1	3	2	putative BPI/LBP family protein At1g04970 isoform X1 [Chenopodium quinoa]
miR319_1	XM_021881575.1	2.5	2.5	transcription factor TCP2-like [Chenopodium quinoa]
miR319_1	XM_021881631.1	2.5	2.5	transcription factor TCP2-like [Chenopodium quinoa]
miR319_1	XM_021881685.1	2.5	2.5	transcription factor TCP2-like [Chenopodium quinoa]
miR319_1	XM_021881751.1	2.5	2.5	transcription factor TCP2-like [Chenopodium quinoa]
miR319_1	XM_021881803.1	2.5	2.5	transcription factor TCP2-like [Chenopodium quinoa]
miR319_1	XM_021881844.1	2.5	2.5	transcription factor TCP2-like [Chenopodium quinoa]
miR319_1	XM_021881887.1	2.5	2.5	transcription factor TCP2-like [Chenopodium quinoa]
miR319_1	XM_021901208.1	2.5	2.2	transcription factor TCP4-like [Chenopodium quinoa]
miR319_1	XM_021908154.1	2.5	2.5	transcription factor TCP2-like [Chenopodium quinoa]
miR319_1	XM_021908155.1	2.5	2.5	transcription factor TCP2-like [Chenopodium quinoa]
miR319_1	XM_021908156.1	2.5	2.5	transcription factor TCP2-like [Chenopodium quinoa]
miR319_1	XM_021908157.1	2.5	2.5	transcription factor TCP2-like [Chenopodium quinoa]
miR319_1	XM_021913218.1	3.5	2	uncharacterized protein LOC110733208 isoform X1 [Chenopodium quinoa]
miR319_1	XM_021914082.1	3.5	2	uncharacterized protein LOC110733208 isoform X2 [Chenopodium quinoa]
miR319_1	XM_021916555.1	2	1	transcription factor GAMYB-like [Chenopodium quinoa]
miR319_1	XM_021916556.1	2	1	transcription factor GAMYB-like [Chenopodium quinoa]
miR319_1	XM_021918063.1	3.5	2.5	RNA exonuclease 4-like isoform X1 [Chenopodium quinoa]
miR319_1	XM_021918064.1	3.5	2.5	RNA exonuclease 4-like isoform X2 [Chenopodium quinoa]
miR319_1	XR_002504048.1	3.5	2	uncharacterized protein LOC110733208 isoform X1 [Chenopodium quinoa]
miR319_1	XR_002504049.1	3.5	2	uncharacterized protein LOC110733208 isoform X1 [Chenopodium quinoa]
miR319a	XM_021872930.1	2.5	2.5	uncharacterized protein LOC110695702 [Chenopodium quinoa]
miR319a	XM_021878602.1	3	1.5	transcription factor GAMYB-like [Chenopodium quinoa]
miR319a	XM_021878603.1	3	1.5	transcription factor GAMYB-like [Chenopodium quinoa]
miR319a	XM_021878604.1	3	1.5	transcription factor GAMYB-like [Chenopodium quinoa]
miR319a	XM_021879550.1	3.5	2.5	putative BPI/LBP family protein At1g04970 isoform X1 [Chenopodium quinoa]
miR319a	XM_021879551.1	3.5	2.5	putative BPI/LBP family protein At1g04970 isoform X1 [Chenopodium quinoa]
miR319a	XM_021913218.1	3	2.5	uncharacterized protein LOC110733208 isoform X1 [Chenopodium quinoa]
miR319a	XM_021914082.1	1.5	2.5	uncharacterized protein LOC110733208 isoform X2 [Chenopodium quinoa]
miR319a	XM_021916555.1	3	1.5	transcription factor GAMYB-like [Chenopodium quinoa]
miR319a	XM_021916556.1	3	1.5	transcription factor GAMYB-like [Chenopodium quinoa]
miR319a-3p	XM_021872930.1	2.5	2.5	uncharacterized protein LOC110695702 [Chenopodium quinoa]
miR319a-3p	XM_021878602.1	3	1.5	transcription factor GAMYB-like [Chenopodium quinoa]
miR319a-3p	XM_021878603.1	3	1.5	transcription factor GAMYB-like [Chenopodium quinoa]
miR319a-3p	XM_021878604.1	3	1.5	transcription factor GAMYB-like [Chenopodium quinoa]
miR319a-3p	XM_021913218.1	3	2.5	uncharacterized protein LOC110733208 isoform X1 [Chenopodium quinoa]
miR319a-3p	XM_021914082.1	1.5	2.5	uncharacterized protein LOC110733208 isoform X2 [Chenopodium quinoa]
miR319a-3p	XM_021916555.1	3	1.5	transcription factor GAMYB-like [Chenopodium quinoa]
miR319a-3p	XM_021916556.1	3	1.5	transcription factor GAMYB-like [Chenopodium quinoa]
miR390e	XM_021876426.1	3.5	2.2	probable LRR receptor-like serine/threonine-protein kinase At3g47570 [Chenopodium quinoa]
miR390e	XM_021876729.1	2.5	1.5	systemin receptor SR160-like [Chenopodium quinoa]
miR390e	XM_021877881.1	3	2.5	LRR receptor-like serine/threonine-protein kinase [Chenopodium quinoa]
miR390e	XM_021882864.1	3.5	2.2	probable LRR receptor-like serine/threonine-protein kinase At3g47570 isoform X1 [Chenopodium quinoa]
miR390e	XM_021882865.1	3.5	2.2	probable LRR receptor-like serine/threonine-protein kinase At3g47570 isoform X2 [Chenopodium quinoa]
miR390e	XM_021907183.1	3	2.5	LRR receptor-like serine/threonine-protein kinase [Chenopodium quinoa]
miR390e	XR_002513527.1	3.5	1.8	-
miR390e	XR_002513779.1	3.5	1.8	-
miR396a-3p_4	XM_021860657.1	3.5	2.5	probable calcium-binding protein CML48 [Chenopodium quinoa]
miR396a-3p_4	XR_002509971.1	3.5	2	kinesin-like protein KIN-7B isoform X1 [Chenopodium quinoa]
miR396a-3p_4	XR_002509975.1	3.5	2	kinesin-like protein KIN-7B isoform X1 [Chenopodium quinoa]
miR396a-3p_4	XR_002509978.1	3.5	2	kinesin-like protein KIN-7B isoform X1 [Chenopodium quinoa]
miR396a-3p_4	XR_002512198.1	2.5	1.2	-
miR396a-3p_5	XM_021875178.1	3.5	2.5	oleoyl-acyl carrier protein thioesterase 2, chloroplastic-like [Chenopodium quinoa]
miR396a-3p_5	XM_021879878.1	3.5	2.5	xylulose 5-phosphate/phosphate translocator, chloroplastic [Spinacia oleracea]
miR396a-3p_5	XM_021909979.1	2.5	1.2	cytochrome P450 710A11-like [Chenopodium quinoa]
miR396a-3p_5	XM_021912474.1	2.5	1.2	cytochrome P450 710A11-like [Chenopodium quinoa]
miR396a-3p_5	XR_002512198.1	3	1.8	-
miR398b-3p	XM_021878553.1	1	1	uncharacterized protein LOC110700988 isoform X1 [Chenopodium quinoa]
miR398b-3p	XM_021878554.1	1	1	uncharacterized protein LOC110700988 isoform X2 [Chenopodium quinoa]
miR398b-3p	XM_021878556.1	1	1	uncharacterized protein LOC110700988 isoform X1 [Chenopodium quinoa]
miR398b-3p	XR_002511081.1	0	0	uncharacterized protein LOC110736312 isoform X3 [Chenopodium quinoa]

## Sheet: hyperosmotic only
miRNA id	Target id	TargetFinder score	psRobot score	NR description
miR160b_1	XM_021866782.1	0.5	0.5	auxin response factor 17-like [Chenopodium quinoa]
miR160b_1	XM_021874932.1	0.5	0.5	auxin response factor 18-like [Chenopodium quinoa]
miR160b_1	XM_021877437.1	0.5	0.5	auxin response factor 17-like [Chenopodium quinoa]
miR160b_1	XM_021892663.1	0.5	0.5	auxin response factor 17-like [Chenopodium quinoa]
miR160b_1	XM_021904434.1	0.5	0.5	auxin response factor 18-like [Chenopodium quinoa]
miR160b_1	XM_021904791.1	0.5	0.5	auxin response factor 17-like [Chenopodium quinoa]
miR160b_1	XM_021915345.1	1	0.8	auxin response factor 18-like [Chenopodium quinoa]
miR160b_1	XM_021915346.1	1	0.8	auxin response factor 18-like [Chenopodium quinoa]
miR160b_1	XM_021919419.1	1	0.8	auxin response factor 18-like [Chenopodium quinoa]
miR164f_1	XM_021863586.1	3	2	protein CUP-SHAPED COTYLEDON 2-like [Chenopodium quinoa]
miR164f_1	XM_021867189.1	1	1	NAC domain-containing protein 21/22-like isoform X1 [Chenopodium quinoa]
miR164f_1	XM_021867191.1	1	1	NAC domain-containing protein 21/22-like isoform X2 [Chenopodium quinoa]
miR164f_1	XM_021878012.1	1	1	NAC domain-containing protein 21/22-like isoform X1 [Chenopodium quinoa]
miR164f_1	XM_021878019.1	1	1	NAC domain-containing protein 21/22-like isoform X2 [Chenopodium quinoa]
miR164f_1	XM_021918032.1	3	2	protein CUP-SHAPED COTYLEDON 2-like [Chenopodium quinoa]
miR166h-3p_1	XM_021913700.1	3.5	2.5	calcium uptake protein, mitochondrial-like [Chenopodium quinoa]
miR166u	XM_021913700.1	2.5	2	calcium uptake protein, mitochondrial-like [Chenopodium quinoa]
miR169d-5p_1	XM_021859348.1	2	1.5	nuclear transcription factor Y subunit A-7-like [Chenopodium quinoa]
miR169d-5p_1	XM_021859349.1	2	1.5	nuclear transcription factor Y subunit A-7-like [Chenopodium quinoa]
miR169d-5p_1	XM_021860810.1	2	1.5	nuclear transcription factor Y subunit A-3-like [Chenopodium quinoa]
miR169d-5p_1	XM_021864799.1	2	1.5	nuclear transcription factor Y subunit A-3-like [Chenopodium quinoa]
miR169d-5p_1	XM_021864800.1	2	1.5	nuclear transcription factor Y subunit A-3-like [Chenopodium quinoa]
miR169d-5p_1	XM_021873301.1	3.5	2.2	nuclear transcription factor Y subunit A-1-like isoform X1 [Chenopodium quinoa]
miR169d-5p_1	XM_021873302.1	3.5	2.2	nuclear transcription factor Y subunit A-1-like isoform X1 [Chenopodium quinoa]
miR169d-5p_1	XM_021873303.1	3.5	2.2	nuclear transcription factor Y subunit A-1-like isoform X2 [Chenopodium quinoa]
miR169d-5p_1	XM_021883579.1	3	2	nuclear transcription factor Y subunit A-4-like isoform X1 [Chenopodium quinoa]
miR169d-5p_1	XM_021883580.1	3	2	nuclear transcription factor Y subunit A-4-like isoform X2 [Chenopodium quinoa]
miR169d-5p_1	XM_021883581.1	3	2	nuclear transcription factor Y subunit A-4-like isoform X3 [Chenopodium quinoa]
miR169d-5p_1	XM_021894366.1	2	1.5	nuclear transcription factor Y subunit A-7-like isoform X1 [Chenopodium quinoa]
miR169d-5p_1	XM_021894367.1	2	1.5	nuclear transcription factor Y subunit A-7-like isoform X1 [Chenopodium quinoa]
miR169d-5p_1	XM_021916389.1	3.5	2.2	nuclear transcription factor Y subunit A-1-like isoform X1 [Chenopodium quinoa]
miR169d-5p_1	XM_021916390.1	3.5	2.2	nuclear transcription factor Y subunit A-1-like isoform X1 [Chenopodium quinoa]
miR169d-5p_1	XM_021916391.1	3.5	2.2	nuclear transcription factor Y subunit A-1-like isoform X1 [Chenopodium quinoa]
miR169d-5p_1	XM_021916392.1	3.5	2.2	nuclear transcription factor Y subunit A-1-like isoform X1 [Chenopodium quinoa]
miR169d-5p_1	XM_021916393.1	3.5	2.2	nuclear transcription factor Y subunit A-1-like isoform X2 [Chenopodium quinoa]
miR169d-5p_1	XR_002511881.1	3	2	nuclear transcription factor Y subunit A-4-like isoform X3 [Chenopodium quinoa]
miR169d-5p_1	XR_002512657.1	3	2	nuclear transcription factor Y subunit A-4-like isoform X3 [Chenopodium quinoa]
miR169h_2	XM_021859348.1	2	1.5	nuclear transcription factor Y subunit A-7-like [Chenopodium quinoa]
miR169h_2	XM_021859349.1	2	1.5	nuclear transcription factor Y subunit A-7-like [Chenopodium quinoa]
miR169h_2	XM_021860810.1	3	2	nuclear transcription factor Y subunit A-3-like [Chenopodium quinoa]
miR169h_2	XM_021864799.1	3	2	nuclear transcription factor Y subunit A-3-like [Chenopodium quinoa]
miR169h_2	XM_021864800.1	3	2	nuclear transcription factor Y subunit A-3-like [Chenopodium quinoa]
miR169h_2	XM_021883579.1	3	2	nuclear transcription factor Y subunit A-4-like isoform X1 [Chenopodium quinoa]
miR169h_2	XM_021883580.1	3	2	nuclear transcription factor Y subunit A-4-like isoform X2 [Chenopodium quinoa]
miR169h_2	XM_021883581.1	3	2	nuclear transcription factor Y subunit A-4-like isoform X3 [Chenopodium quinoa]
miR169h_2	XM_021894366.1	2.5	1.8	nuclear transcription factor Y subunit A-7-like isoform X1 [Chenopodium quinoa]
miR169h_2	XM_021894367.1	2.5	1.8	nuclear transcription factor Y subunit A-7-like isoform X1 [Chenopodium quinoa]
miR169h_2	XR_002511881.1	3	2	nuclear transcription factor Y subunit A-4-like isoform X3 [Chenopodium quinoa]
miR169h_2	XR_002512657.1	3	2	nuclear transcription factor Y subunit A-4-like isoform X3 [Chenopodium quinoa]
miR394a_1	XM_021867401.1	1	1	F-box only protein 6-like [Chenopodium quinoa]
miR394a_1	XM_021889441.1	1	1	F-box only protein 6-like isoform X1 [Chenopodium quinoa]
miR394a_1	XM_021889444.1	1	1	F-box only protein 6-like isoform X2 [Chenopodium quinoa]
miR394a_1	XM_021889446.1	1	1	F-box only protein 6-like isoform X3 [Chenopodium quinoa]
miR395a_5	XM_021859139.1	3.5	2	sulfate transporter 1.2-like [Chenopodium quinoa]
miR395a_5	XM_021873791.1	3.5	2	sulfate transporter 1.2-like [Chenopodium quinoa]
miR395a_5	XM_021902063.1	3	1.5	methionine gamma-lyase-like [Chenopodium quinoa]
miR395a_5	XM_021908072.1	2.5	1.5	ATP sulfurylase 1, chloroplastic-like [Chenopodium quinoa]
miR395a_5	XM_021908362.1	2.5	1.5	ATP sulfurylase 1, chloroplastic-like [Chenopodium quinoa]
miR395a_5	XM_021909730.1	3.5	2	uncharacterized protein LOC110729935 isoform X1 [Chenopodium quinoa]
miR395a_5	XM_021909737.1	3.5	2	uncharacterized protein LOC110729935 isoform X2 [Chenopodium quinoa]
miR395a_5	XM_021909740.1	3.5	2	uncharacterized protein LOC110729935 isoform X3 [Chenopodium quinoa]
miR395a_5	XM_021909743.1	3.5	2	uncharacterized protein LOC110729935 isoform X4 [Chenopodium quinoa]
miR395a_5	XM_021912225.1	3.5	2	methionine gamma-lyase-like [Chenopodium quinoa]
miR395a_5	XM_021912651.1	3.5	2	probable receptor-like protein kinase At1g33260 [Chenopodium quinoa]
miR395a_5	XR_002505090.1	1	0.5	-
miR398	XM_021878553.1	1	1	uncharacterized protein LOC110700988 isoform X1 [Chenopodium quinoa]
miR398	XM_021878554.1	1	1	uncharacterized protein LOC110700988 isoform X2 [Chenopodium quinoa]
miR398	XM_021878556.1	1	1	uncharacterized protein LOC110700988 isoform X1 [Chenopodium quinoa]
miR398	XR_002511081.1	0	0	uncharacterized protein LOC110736312 isoform X3 [Chenopodium quinoa]
miR398b-3p	XM_021878553.1	1	1	uncharacterized protein LOC110700988 isoform X1 [Chenopodium quinoa]
miR398b-3p	XM_021878554.1	1	1	uncharacterized protein LOC110700988 isoform X2 [Chenopodium quinoa]
miR398b-3p	XM_021878556.1	1	1	uncharacterized protein LOC110700988 isoform X1 [Chenopodium quinoa]
miR398b-3p	XR_002511081.1	0	0	uncharacterized protein LOC110736312 isoform X3 [Chenopodium quinoa]
miR399j_2	XM_021870761.1	3.5	1.8	probable ubiquitin-conjugating enzyme E2 24 isoform X1 [Chenopodium quinoa]
miR399j_2	XM_021870762.1	3.5	1.8	probable ubiquitin-conjugating enzyme E2 24 isoform X1 [Chenopodium quinoa]
miR399j_2	XM_021870763.1	3.5	1.8	probable ubiquitin-conjugating enzyme E2 24 isoform X1 [Chenopodium quinoa]
miR399j_2	XM_021884905.1	3.5	1.8	probable ubiquitin-conjugating enzyme E2 24 isoform X1 [Chenopodium quinoa]
miR399j_2	XM_021884906.1	3.5	1.8	probable ubiquitin-conjugating enzyme E2 24 isoform X1 [Chenopodium quinoa]
miR399j_2	XM_021884907.1	3.5	1.8	probable ubiquitin-conjugating enzyme E2 24 isoform X1 [Chenopodium quinoa]
miR399j_2	XR_002510403.1	3.5	2	-
miR408b_1	XM_021863375.1	3	2.2	protease Do-like 9 [Chenopodium quinoa]
miR408b_1	XM_021865275.1	3	2	laccase-3-like [Chenopodium quinoa]
miR408b_1	XM_021871621.1	2	1.5	uclacyanin-2-like [Chenopodium quinoa]
miR408b_1	XM_021889305.1	2	1.5	uclacyanin-2-like [Chenopodium quinoa]
miR408b_1	XM_021905246.1	1.5	0.8	basic blue protein-like [Chenopodium quinoa]
miR408b_1	XM_021915984.1	1.5	0.8	basic blue protein-like [Chenopodium quinoa]
miR827a	XM_021880233.1	2	1	SPX domain-containing membrane protein At4g22990-like [Chenopodium quinoa]
miR827a	XM_021898466.1	0	0	SPX domain-containing membrane protein At4g22990-like [Chenopodium quinoa]
miR827a	XR_002514644.1	0	0	-

## Sheet: saline&alkaline
miRNA id	Target id	TargetFinder score	psRobot score	NR description
miR166h-3p_1	XM_021913700.1	3.5	2.5	calcium uptake protein, mitochondrial-like [Chenopodium quinoa]
miR166u	XM_021913700.1	2.5	2	calcium uptake protein, mitochondrial-like [Chenopodium quinoa]
miR168_1	XR_002511081.1	0	0	uncharacterized protein LOC110736312 isoform X3 [Chenopodium quinoa]
miR169e_3	XM_021859348.1	3	1.5	nuclear transcription factor Y subunit A-7-like [Chenopodium quinoa]
miR169e_3	XM_021859349.1	3	1.5	nuclear transcription factor Y subunit A-7-like [Chenopodium quinoa]
miR169e_3	XM_021860810.1	3	2	nuclear transcription factor Y subunit A-3-like [Chenopodium quinoa]
miR169e_3	XM_021864799.1	3	2	nuclear transcription factor Y subunit A-3-like [Chenopodium quinoa]
miR169e_3	XM_021864800.1	3	2	nuclear transcription factor Y subunit A-3-like [Chenopodium quinoa]
miR169e_3	XM_021894366.1	3.5	1.8	nuclear transcription factor Y subunit A-7-like isoform X1 [Chenopodium quinoa]
miR169e_3	XM_021894367.1	3.5	1.8	nuclear transcription factor Y subunit A-7-like isoform X1 [Chenopodium quinoa]
miR169e_3	XM_021920326.1	3.5	2.5	uncharacterized protein LOC110739844 [Chenopodium quinoa]
miR169e_3	XM_021920327.1	3.5	2.5	uncharacterized protein LOC110739844 [Chenopodium quinoa]
miR169r-3p	XM_021882413.1	3.5	1.8	elongation factor G-2, chloroplastic-like [Chenopodium quinoa]
miR169r-3p	XM_021912719.1	3.5	1.8	elongation factor G-2, chloroplastic [Chenopodium quinoa]
miR172e-3p_1	XM_021858650.1	2	1	floral homeotic protein APETALA 2-like [Chenopodium quinoa]
miR172e-3p_1	XM_021860086.1	2	1	floral homeotic protein APETALA 2-like isoform X1 [Chenopodium quinoa]
miR172e-3p_1	XM_021860087.1	2	1	floral homeotic protein APETALA 2-like isoform X2 [Chenopodium quinoa]
miR172e-3p_1	XM_021860088.1	2	1	floral homeotic protein APETALA 2-like isoform X3 [Chenopodium quinoa]
miR172e-3p_1	XM_021860089.1	2	1	ethylene-responsive transcription factor RAP2-7-like isoform X4 [Chenopodium quinoa]
miR172e-3p_1	XM_021860090.1	2	1	AP2-like ethylene-responsive transcription factor TOE3 isoform X5 [Chenopodium quinoa]
miR172e-3p_1	XM_021860091.1	2	1	AP2-like ethylene-responsive transcription factor TOE3 isoform X6 [Chenopodium quinoa]
miR172e-3p_1	XM_021874129.1	2.5	1.8	uncharacterized protein LOC110696272 isoform X1 [Chenopodium quinoa]
miR172e-3p_1	XM_021879136.1	3.5	2.2	probable inactive histone-lysine N-methyltransferase SUVR2 [Chenopodium quinoa]
miR172e-3p_1	XM_021882761.1	3	1.8	APO protein 2, chloroplastic-like [Chenopodium quinoa]
miR172e-3p_1	XM_021885878.1	3.5	2	aldehyde dehydrogenase family 2 member C4-like [Manihot esculenta]
miR172e-3p_1	XM_021888574.1	2	1	AP2-like ethylene-responsive transcription factor TOE3 isoform X1 [Chenopodium quinoa]
miR172e-3p_1	XM_021888575.1	2	1	AP2-like ethylene-responsive transcription factor TOE3 isoform X2 [Chenopodium quinoa]
miR172e-3p_1	XM_021888576.1	2	1	AP2-like ethylene-responsive transcription factor TOE3 isoform X3 [Chenopodium quinoa]
miR172e-3p_1	XM_021888577.1	2	1	ethylene-responsive transcription factor RAP2-7-like isoform X4 [Chenopodium quinoa]
miR172e-3p_1	XM_021888578.1	2	1	ethylene-responsive transcription factor RAP2-7-like isoform X5 [Chenopodium quinoa]
miR172e-3p_1	XM_021888579.1	2	1	AP2-like ethylene-responsive transcription factor TOE3 isoform X6 [Chenopodium quinoa]
miR172e-3p_1	XM_021888580.1	2	1	AP2-like ethylene-responsive transcription factor TOE3 isoform X7 [Chenopodium quinoa]
miR172e-3p_1	XM_021890360.1	3	1.5	ethylene-responsive transcription factor ERF113-like isoform X1 [Chenopodium quinoa]
miR172e-3p_1	XM_021890366.1	3	1.5	ethylene-responsive transcription factor ERF113-like isoform X2 [Chenopodium quinoa]
miR172e-3p_1	XM_021897122.1	2	1	floral homeotic protein APETALA 2-like [Chenopodium quinoa]
miR172e-3p_1	XM_021900042.1	3	2	uncharacterized protein LOC110720943 [Chenopodium quinoa]
miR172e-3p_1	XM_021906459.1	3.5	1.8	fatty-acid-binding protein 2-like [Chenopodium quinoa]
miR172e-3p_1	XM_021906460.1	3.5	1.8	fatty-acid-binding protein 2-like [Chenopodium quinoa]
miR172e-3p_1	XM_021906461.1	3.5	1.8	fatty-acid-binding protein 2-like [Chenopodium quinoa]
miR172e-3p_1	XM_021907641.1	3.5	2	uncharacterized protein LOC110728035 isoform X1 [Chenopodium quinoa]
miR172e-3p_1	XM_021907642.1	3.5	2	uncharacterized protein LOC110728035 isoform X2 [Chenopodium quinoa]
miR172e-3p_1	XM_021916052.1	3.5	2.2	histone-lysine N-methyltransferase SUVR4 [Chenopodium quinoa]
miR319a_1	XM_021872930.1	2.5	2.5	uncharacterized protein LOC110695702 [Chenopodium quinoa]
miR319a_1	XM_021913218.1	3	2.5	uncharacterized protein LOC110733208 isoform X1 [Chenopodium quinoa]
miR319a_1	XM_021914082.1	1.5	2.5	uncharacterized protein LOC110733208 isoform X2 [Chenopodium quinoa]
miR393a-5p	XM_021886650.1	2	1	protein TRANSPORT INHIBITOR RESPONSE 1 [Jatropha curcas]
miR393a-5p	XM_021900356.1	2	1	protein AUXIN SIGNALING F-BOX 2-like [Chenopodium quinoa]
miR393a-5p	XM_021906794.1	2	1	protein AUXIN SIGNALING F-BOX 2-like [Chenopodium quinoa]
miR393a-5p	XM_021917362.1	2	1	protein TRANSPORT INHIBITOR RESPONSE 1 [Jatropha curcas]
miR394a_1	XM_021867401.1	1	1	F-box only protein 6-like [Chenopodium quinoa]
miR394a_1	XM_021889441.1	1	1	F-box only protein 6-like isoform X1 [Chenopodium quinoa]
miR394a_1	XM_021889444.1	1	1	F-box only protein 6-like isoform X2 [Chenopodium quinoa]
miR394a_1	XM_021889446.1	1	1	F-box only protein 6-like isoform X3 [Chenopodium quinoa]
miR395a_5	XM_021859139.1	3.5	2	sulfate transporter 1.2-like [Chenopodium quinoa]
miR395a_5	XM_021873791.1	3.5	2	sulfate transporter 1.2-like [Chenopodium quinoa]
miR395a_5	XM_021902063.1	3	1.5	methionine gamma-lyase-like [Chenopodium quinoa]
miR395a_5	XM_021908072.1	2.5	1.5	ATP sulfurylase 1, chloroplastic-like [Chenopodium quinoa]
miR395a_5	XM_021908362.1	2.5	1.5	ATP sulfurylase 1, chloroplastic-like [Chenopodium quinoa]
miR395a_5	XM_021909730.1	3.5	2	uncharacterized protein LOC110729935 isoform X1 [Chenopodium quinoa]
miR395a_5	XM_021909737.1	3.5	2	uncharacterized protein LOC110729935 isoform X2 [Chenopodium quinoa]
miR395a_5	XM_021909740.1	3.5	2	uncharacterized protein LOC110729935 isoform X3 [Chenopodium quinoa]
miR395a_5	XM_021909743.1	3.5	2	uncharacterized protein LOC110729935 isoform X4 [Chenopodium quinoa]
miR395a_5	XM_021912225.1	3.5	2	methionine gamma-lyase-like [Chenopodium quinoa]
miR395a_5	XM_021912651.1	3.5	2	probable receptor-like protein kinase At1g33260 [Chenopodium quinoa]
miR395a_5	XR_002505090.1	1	0.5	-
miR398	XM_021878553.1	1	1	uncharacterized protein LOC110700988 isoform X1 [Chenopodium quinoa]
miR398	XM_021878554.1	1	1	uncharacterized protein LOC110700988 isoform X2 [Chenopodium quinoa]
miR398	XM_021878556.1	1	1	uncharacterized protein LOC110700988 isoform X1 [Chenopodium quinoa]
miR398	XR_002511081.1	0	0	uncharacterized protein LOC110736312 isoform X3 [Chenopodium quinoa]
miR398b	XM_021878553.1	0	0	uncharacterized protein LOC110700988 isoform X1 [Chenopodium quinoa]
miR398b	XM_021878554.1	0	0	uncharacterized protein LOC110700988 isoform X2 [Chenopodium quinoa]
miR398b	XM_021878556.1	0	0	uncharacterized protein LOC110700988 isoform X1 [Chenopodium quinoa]
miR398b	XR_002511081.1	0.5	0.5	uncharacterized protein LOC110736312 isoform X3 [Chenopodium quinoa]
miR399f_3	XM_021870761.1	3.5	1	probable ubiquitin-conjugating enzyme E2 24 isoform X1 [Chenopodium quinoa]
miR399f_3	XM_021870762.1	3.5	1	probable ubiquitin-conjugating enzyme E2 24 isoform X1 [Chenopodium quinoa]
miR399f_3	XM_021870763.1	3.5	1	probable ubiquitin-conjugating enzyme E2 24 isoform X1 [Chenopodium quinoa]
miR6300	XM_021868606.1	3.5	2.2	meiotic recombination protein SPO11-2 [Spinacia oleracea]
miR6300	XM_021877389.1	0	0	protein trichome birefringence-like 43 [Chenopodium quinoa]
miR6300	XM_021882417.1	3.5	2	acid beta-fructofuranosidase 2, vacuolar-like [Chenopodium quinoa]
miR6300	XM_021882867.1	3.5	2.2	putative receptor-like protein kinase At3g47110 [Chenopodium quinoa]
miR6300	XM_021890159.1	3.5	1.8	serine hydroxymethyltransferase 4 [Chenopodium quinoa]
miR6300	XM_021893466.1	3.5	1.8	serine hydroxymethyltransferase 4-like [Chenopodium quinoa]
miR6300	XM_021901295.1	3.5	2	uncharacterized protein LOC110722058 [Chenopodium quinoa]
miR6300	XM_021904655.1	3	1.8	jasmonic acid-amido synthetase JAR1-like [Spinacia oleracea]
miR6300	XM_021906833.1	3.5	2.2	putative nuclease HARBI1 [Chenopodium quinoa]
miR6300	XM_021912726.1	3.5	2	acid beta-fructofuranosidase 2, vacuolar-like [Chenopodium quinoa]
miR6300	XR_002506329.1	2	1.2	-
miR8051-5p	XM_021858279.1	3	1.5	crossover junction endonuclease EME1B-like isoform X1 [Chenopodium quinoa]
miR8051-5p	XM_021858280.1	3	1.5	crossover junction endonuclease EME1B-like isoform X2 [Chenopodium quinoa]
miR8051-5p	XM_021859701.1	1	0.5	L-type lectin-domain containing receptor kinase IV.1-like [Chenopodium quinoa]
miR8051-5p	XM_021859702.1	2.5	1	L-type lectin-domain containing receptor kinase IV.1-like [Chenopodium quinoa]
miR8051-5p	XM_021865108.1	2	1	L-type lectin-domain containing receptor kinase IV.1-like [Chenopodium quinoa]

## Sheet: saline&hyperosmotic
miRNA id	Target id	TargetFinder score	psRobot score	NR description
miR167d_1	XM_021863533.1	3	2.5	DNA-directed RNA polymerase V subunit 7-like [Chenopodium quinoa]
miR167d_1	XM_021911394.1	2.5	1.5	protein PAIR1-like isoform X2 [Chenopodium quinoa]
miR167d_1	XR_002512788.1	2	1	-
miR169b-5p	XM_021859348.1	3	2	nuclear transcription factor Y subunit A-7-like [Chenopodium quinoa]
miR169b-5p	XM_021859349.1	3	2	nuclear transcription factor Y subunit A-7-like [Chenopodium quinoa]
miR169b-5p	XM_021873301.1	3	2	nuclear transcription factor Y subunit A-1-like isoform X1 [Chenopodium quinoa]
miR169b-5p	XM_021873302.1	3	2	nuclear transcription factor Y subunit A-1-like isoform X1 [Chenopodium quinoa]
miR169b-5p	XM_021873303.1	3	2	nuclear transcription factor Y subunit A-1-like isoform X2 [Chenopodium quinoa]
miR169b-5p	XM_021894366.1	3.5	2.2	nuclear transcription factor Y subunit A-7-like isoform X1 [Chenopodium quinoa]
miR169b-5p	XM_021894367.1	3.5	2.2	nuclear transcription factor Y subunit A-7-like isoform X1 [Chenopodium quinoa]
miR169b-5p	XM_021916389.1	3	2	nuclear transcription factor Y subunit A-1-like isoform X1 [Chenopodium quinoa]
miR169b-5p	XM_021916390.1	3	2	nuclear transcription factor Y subunit A-1-like isoform X1 [Chenopodium quinoa]
miR169b-5p	XM_021916391.1	3	2	nuclear transcription factor Y subunit A-1-like isoform X1 [Chenopodium quinoa]
miR169b-5p	XM_021916392.1	3	2	nuclear transcription factor Y subunit A-1-like isoform X1 [Chenopodium quinoa]
miR169b-5p	XM_021916393.1	3	2	nuclear transcription factor Y subunit A-1-like isoform X2 [Chenopodium quinoa]
miR169b-5p	XM_021920326.1	2.5	2.5	uncharacterized protein LOC110739844 [Chenopodium quinoa]
miR169b-5p	XM_021920327.1	2.5	2.5	uncharacterized protein LOC110739844 [Chenopodium quinoa]
miR319_1	XM_021861725.1	2.5	2.2	transcription factor TCP4-like [Chenopodium quinoa]
miR319_1	XM_021863548.1	3.5	2.5	RNA exonuclease 4-like [Chenopodium quinoa]
miR319_1	XM_021872930.1	3.5	2	uncharacterized protein LOC110695702 [Chenopodium quinoa]
miR319_1	XM_021878602.1	2	1	transcription factor GAMYB-like [Chenopodium quinoa]
miR319_1	XM_021878603.1	2	1	transcription factor GAMYB-like [Chenopodium quinoa]
miR319_1	XM_021878604.1	2	1	transcription factor GAMYB-like [Chenopodium quinoa]
miR319_1	XM_021879550.1	3	2	putative BPI/LBP family protein At1g04970 isoform X1 [Chenopodium quinoa]
miR319_1	XM_021879551.1	3	2	putative BPI/LBP family protein At1g04970 isoform X1 [Chenopodium quinoa]
miR319_1	XM_021881575.1	2.5	2.5	transcription factor TCP2-like [Chenopodium quinoa]
miR319_1	XM_021881631.1	2.5	2.5	transcription factor TCP2-like [Chenopodium quinoa]
miR319_1	XM_021881685.1	2.5	2.5	transcription factor TCP2-like [Chenopodium quinoa]
miR319_1	XM_021881751.1	2.5	2.5	transcription factor TCP2-like [Chenopodium quinoa]
miR319_1	XM_021881803.1	2.5	2.5	transcription factor TCP2-like [Chenopodium quinoa]
miR319_1	XM_021881844.1	2.5	2.5	transcription factor TCP2-like [Chenopodium quinoa]
miR319_1	XM_021881887.1	2.5	2.5	transcription factor TCP2-like [Chenopodium quinoa]
miR319_1	XM_021901208.1	2.5	2.2	transcription factor TCP4-like [Chenopodium quinoa]
miR319_1	XM_021908154.1	2.5	2.5	transcription factor TCP2-like [Chenopodium quinoa]
miR319_1	XM_021908155.1	2.5	2.5	transcription factor TCP2-like [Chenopodium quinoa]
miR319_1	XM_021908156.1	2.5	2.5	transcription factor TCP2-like [Chenopodium quinoa]
miR319_1	XM_021908157.1	2.5	2.5	transcription factor TCP2-like [Chenopodium quinoa]
miR319_1	XM_021913218.1	3.5	2	uncharacterized protein LOC110733208 isoform X1 [Chenopodium quinoa]
miR319_1	XM_021914082.1	3.5	2	uncharacterized protein LOC110733208 isoform X2 [Chenopodium quinoa]
miR319_1	XM_021916555.1	2	1	transcription factor GAMYB-like [Chenopodium quinoa]
miR319_1	XM_021916556.1	2	1	transcription factor GAMYB-like [Chenopodium quinoa]
miR319_1	XM_021918063.1	3.5	2.5	RNA exonuclease 4-like isoform X1 [Chenopodium quinoa]
miR319_1	XM_021918064.1	3.5	2.5	RNA exonuclease 4-like isoform X2 [Chenopodium quinoa]
miR319_1	XR_002504048.1	3.5	2	uncharacterized protein LOC110733208 isoform X1 [Chenopodium quinoa]
miR319_1	XR_002504049.1	3.5	2	uncharacterized protein LOC110733208 isoform X1 [Chenopodium quinoa]
miR319a-3p	XM_021872930.1	2.5	2.5	uncharacterized protein LOC110695702 [Chenopodium quinoa]
miR319a-3p	XM_021878602.1	3	1.5	transcription factor GAMYB-like [Chenopodium quinoa]
miR319a-3p	XM_021878603.1	3	1.5	transcription factor GAMYB-like [Chenopodium quinoa]
miR319a-3p	XM_021878604.1	3	1.5	transcription factor GAMYB-like [Chenopodium quinoa]
miR319a-3p	XM_021913218.1	3	2.5	uncharacterized protein LOC110733208 isoform X1 [Chenopodium quinoa]
miR319a-3p	XM_021914082.1	1.5	2.5	uncharacterized protein LOC110733208 isoform X2 [Chenopodium quinoa]
miR319a-3p	XM_021916555.1	3	1.5	transcription factor GAMYB-like [Chenopodium quinoa]
miR319a-3p	XM_021916556.1	3	1.5	transcription factor GAMYB-like [Chenopodium quinoa]
miR396a-3p_1	XR_002512198.1	3	1.5	-

## Sheet: alkaline&hyperosmotic
miRNA id	Target id	TargetFinder score	psRobot score	NR description
miR156b-3p_6	XM_021908184.1	3.5	2.5	uncharacterized protein LOC110728541 [Chenopodium quinoa]
miR166e	XM_021863024.1	3	2.5	beta-1,3-galactosyltransferase 7-like [Chenopodium quinoa]
miR166e	XM_021881599.1	2	1	PREDICTED: homeobox-leucine zipper protein ATHB-8 [Beta vulgaris subsp. vulgaris]
miR166e	XM_021881600.1	2	1	PREDICTED: homeobox-leucine zipper protein ATHB-8 [Beta vulgaris subsp. vulgaris]
miR166e	XM_021883445.1	2	1	PREDICTED: homeobox-leucine zipper protein ATHB-8 [Beta vulgaris subsp. vulgaris]
miR166e	XM_021883446.1	2	1	PREDICTED: homeobox-leucine zipper protein ATHB-8 [Beta vulgaris subsp. vulgaris]
miR166e	XM_021883627.1	3	2	glutamine--fructose-6-phosphate aminotransferase [isomerizing] 2-like isoform X1 [Chenopodium quinoa]
miR166e	XM_021883628.1	3	2	glutamine--fructose-6-phosphate aminotransferase [isomerizing] 2-like isoform X2 [Chenopodium quinoa]
miR166e	XM_021886386.1	3	2.5	beta-1,3-galactosyltransferase 7-like [Chenopodium quinoa]
miR166e	XM_021886388.1	3	2.5	beta-1,3-galactosyltransferase 7-like [Chenopodium quinoa]
miR166e	XM_021890249.1	2.5	1.5	homeobox-leucine zipper protein REVOLUTA-like [Chenopodium quinoa]
miR166e	XM_021894193.1	2	1	PREDICTED: homeobox-leucine zipper protein ATHB-15 isoform X1 [Beta vulgaris subsp. vulgaris]
miR166e	XM_021909638.1	2	1	PREDICTED: homeobox-leucine zipper protein ATHB-15 isoform X1 [Beta vulgaris subsp. vulgaris]
miR166e	XM_021917625.1	2.5	1.5	homeobox-leucine zipper protein REVOLUTA-like [Chenopodium quinoa]
miR166e-3p	XM_021881599.1	3	1.5	PREDICTED: homeobox-leucine zipper protein ATHB-8 [Beta vulgaris subsp. vulgaris]
miR166e-3p	XM_021881600.1	3	1.5	PREDICTED: homeobox-leucine zipper protein ATHB-8 [Beta vulgaris subsp. vulgaris]
miR166e-3p	XM_021883445.1	3	1.5	PREDICTED: homeobox-leucine zipper protein ATHB-8 [Beta vulgaris subsp. vulgaris]
miR166e-3p	XM_021883446.1	3	1.5	PREDICTED: homeobox-leucine zipper protein ATHB-8 [Beta vulgaris subsp. vulgaris]
miR166e-3p	XM_021890249.1	3.5	1.5	homeobox-leucine zipper protein REVOLUTA-like [Chenopodium quinoa]
miR166e-3p	XM_021894193.1	3	1.5	PREDICTED: homeobox-leucine zipper protein ATHB-15 isoform X1 [Beta vulgaris subsp. vulgaris]
miR166e-3p	XM_021909638.1	3	1.5	PREDICTED: homeobox-leucine zipper protein ATHB-15 isoform X1 [Beta vulgaris subsp. vulgaris]
miR166e-3p	XM_021917625.1	3.5	1.5	homeobox-leucine zipper protein REVOLUTA-like [Chenopodium quinoa]
miR166m_2	XM_021881599.1	2	1	PREDICTED: homeobox-leucine zipper protein ATHB-8 [Beta vulgaris subsp. vulgaris]
miR166m_2	XM_021881600.1	2	1	PREDICTED: homeobox-leucine zipper protein ATHB-8 [Beta vulgaris subsp. vulgaris]
miR166m_2	XM_021883445.1	2	1	PREDICTED: homeobox-leucine zipper protein ATHB-8 [Beta vulgaris subsp. vulgaris]
miR166m_2	XM_021883446.1	2	1	PREDICTED: homeobox-leucine zipper protein ATHB-8 [Beta vulgaris subsp. vulgaris]
miR166m_2	XM_021886386.1	3	2	beta-1,3-galactosyltransferase 7-like [Chenopodium quinoa]
miR166m_2	XM_021886388.1	3	2	beta-1,3-galactosyltransferase 7-like [Chenopodium quinoa]
miR166m_2	XM_021890249.1	2.5	1.5	homeobox-leucine zipper protein REVOLUTA-like [Chenopodium quinoa]
miR166m_2	XM_021894193.1	2	1	PREDICTED: homeobox-leucine zipper protein ATHB-15 isoform X1 [Beta vulgaris subsp. vulgaris]
miR166m_2	XM_021909638.1	2	1	PREDICTED: homeobox-leucine zipper protein ATHB-15 isoform X1 [Beta vulgaris subsp. vulgaris]
miR166m_2	XM_021917625.1	2.5	1.5	homeobox-leucine zipper protein REVOLUTA-like [Chenopodium quinoa]
miR169a-3p_3	XM_021864033.1	3	2	L-ascorbate oxidase homolog isoform X2 [Spinacia oleracea]
miR169a-3p_3	XM_021864034.1	3	2	L-ascorbate oxidase homolog isoform X1 [Spinacia oleracea]
miR169a-3p_3	XM_021882413.1	2.5	1.2	elongation factor G-2, chloroplastic-like [Chenopodium quinoa]
miR169a-3p_3	XM_021911169.1	3	2	L-ascorbate oxidase homolog isoform X2 [Spinacia oleracea]
miR169a-3p_3	XM_021911170.1	3	2	L-ascorbate oxidase homolog isoform X1 [Spinacia oleracea]
miR169a-3p_3	XM_021912719.1	2.5	1.2	elongation factor G-2, chloroplastic [Chenopodium quinoa]
miR169c-3p_3	XM_021882413.1	3.5	1.8	elongation factor G-2, chloroplastic-like [Chenopodium quinoa]
miR169c-3p_3	XM_021912719.1	3.5	1.8	elongation factor G-2, chloroplastic [Chenopodium quinoa]
miR171c_3	XM_021862798.1	3	1.5	scarecrow-like protein 15 [Chenopodium quinoa]
miR171c_3	XM_021882454.1	1	0.5	scarecrow-like protein 6 isoform X1 [Chenopodium quinoa]
miR171c_3	XM_021882455.1	1	0.5	scarecrow-like protein 6 isoform X2 [Chenopodium quinoa]
miR171c_3	XM_021885036.1	3	2	pentatricopeptide repeat-containing protein At5g55840-like [Chenopodium quinoa]
miR171c_3	XM_021885037.1	3	2	pentatricopeptide repeat-containing protein At5g55840-like [Chenopodium quinoa]
miR171c_3	XM_021885038.1	3	2	pentatricopeptide repeat-containing protein At5g55840-like [Chenopodium quinoa]
miR171c_3	XM_021902101.1	3	1.5	scarecrow-like protein 15 [Chenopodium quinoa]
miR171c_3	XM_021912768.1	1	0.5	scarecrow-like protein 6 isoform X1 [Chenopodium quinoa]
miR171c_3	XM_021912769.1	1	0.5	scarecrow-like protein 6 isoform X2 [Chenopodium quinoa]
miR171c_3	XM_021915714.1	3	2	pentatricopeptide repeat-containing protein At5g55840-like [Chenopodium quinoa]
miR171c_3	XM_021915715.1	3	2	pentatricopeptide repeat-containing protein At5g55840-like [Chenopodium quinoa]
miR171c_3	XM_021915716.1	3	2	pentatricopeptide repeat-containing protein At5g55840-like [Chenopodium quinoa]
miR171c_3	XM_021915717.1	3	2	pentatricopeptide repeat-containing protein At5g55840-like [Chenopodium quinoa]
miR172c_2	XM_021858650.1	1	0.5	floral homeotic protein APETALA 2-like [Chenopodium quinoa]
miR172c_2	XM_021860086.1	1	0.5	floral homeotic protein APETALA 2-like isoform X1 [Chenopodium quinoa]
miR172c_2	XM_021860087.1	1	0.5	floral homeotic protein APETALA 2-like isoform X2 [Chenopodium quinoa]
miR172c_2	XM_021860088.1	1	0.5	floral homeotic protein APETALA 2-like isoform X3 [Chenopodium quinoa]
miR172c_2	XM_021860089.1	1	0.5	ethylene-responsive transcription factor RAP2-7-like isoform X4 [Chenopodium quinoa]
miR172c_2	XM_021860090.1	1	0.5	AP2-like ethylene-responsive transcription factor TOE3 isoform X5 [Chenopodium quinoa]
miR172c_2	XM_021860091.1	1	0.5	AP2-like ethylene-responsive transcription factor TOE3 isoform X6 [Chenopodium quinoa]
miR172c_2	XM_021888574.1	1	0.5	AP2-like ethylene-responsive transcription factor TOE3 isoform X1 [Chenopodium quinoa]
miR172c_2	XM_021888575.1	1	0.5	AP2-like ethylene-responsive transcription factor TOE3 isoform X2 [Chenopodium quinoa]
miR172c_2	XM_021888576.1	1	0.5	AP2-like ethylene-responsive transcription factor TOE3 isoform X3 [Chenopodium quinoa]
miR172c_2	XM_021888577.1	1	0.5	ethylene-responsive transcription factor RAP2-7-like isoform X4 [Chenopodium quinoa]
miR172c_2	XM_021888578.1	1	0.5	ethylene-responsive transcription factor RAP2-7-like isoform X5 [Chenopodium quinoa]
miR172c_2	XM_021897122.1	1	0.5	floral homeotic protein APETALA 2-like [Chenopodium quinoa]
miR172c_2	XM_021907641.1	3.5	1.8	uncharacterized protein LOC110728035 isoform X1 [Chenopodium quinoa]
miR172c_2	XM_021907642.1	3.5	1.8	uncharacterized protein LOC110728035 isoform X2 [Chenopodium quinoa]
miR399a_6	XM_021870761.1	3.5	1.8	probable ubiquitin-conjugating enzyme E2 24 isoform X1 [Chenopodium quinoa]
miR399a_6	XM_021870762.1	3.5	1.8	probable ubiquitin-conjugating enzyme E2 24 isoform X1 [Chenopodium quinoa]
miR399a_6	XM_021870763.1	3.5	1.8	probable ubiquitin-conjugating enzyme E2 24 isoform X1 [Chenopodium quinoa]
miR399a_6	XM_021871692.1	3	1.5	amino acid transporter AVT1C-like [Chenopodium quinoa]
miR399a_6	XM_021884905.1	3.5	1.8	probable ubiquitin-conjugating enzyme E2 24 isoform X1 [Chenopodium quinoa]
miR399a_6	XM_021884906.1	3.5	1.8	probable ubiquitin-conjugating enzyme E2 24 isoform X1 [Chenopodium quinoa]
miR399a_6	XM_021884907.1	3.5	1.8	probable ubiquitin-conjugating enzyme E2 24 isoform X1 [Chenopodium quinoa]
miR399a_6	XM_021891118.1	3	1.5	amino acid transporter AVT1C-like [Chenopodium quinoa]
miR399a_6	XM_021891119.1	3	1.5	amino acid transporter AVT1C-like [Chenopodium quinoa]
miR399a_6	XR_002510403.1	1.5	1	-

## Sheet: saline&alkaline&hyperosmotic
miRNA id	Target id	TargetFinder score	psRobot score	NR description
miR157d	XM_021857955.1	2	1	squamosa promoter-binding-like protein 16 isoform X1 [Chenopodium quinoa]
miR157d	XM_021857956.1	2	1	squamosa promoter-binding-like protein 16 isoform X2 [Chenopodium quinoa]
miR157d	XM_021862675.1	2	1	squamosa promoter-binding-like protein 6 isoform X1 [Chenopodium quinoa]
miR157d	XM_021862676.1	2	1	squamosa promoter-binding-like protein 6 isoform X2 [Chenopodium quinoa]
miR157d	XM_021867382.1	2	1	squamosa promoter-binding-like protein 13A [Chenopodium quinoa]
miR157d	XM_021867383.1	2	1	squamosa promoter-binding-like protein 13A [Chenopodium quinoa]
miR157d	XM_021867384.1	2	1	squamosa promoter-binding-like protein 13A [Chenopodium quinoa]
miR157d	XM_021867403.1	2	1	squamosa promoter-binding-like protein 2 [Chenopodium quinoa]
miR157d	XM_021867404.1	2	1	squamosa promoter-binding-like protein 2 [Chenopodium quinoa]
miR157d	XM_021868311.1	2	1	squamosa promoter-binding-like protein 17 isoform X1 [Chenopodium quinoa]
miR157d	XM_021868312.1	2	1	squamosa promoter-binding-like protein 17 isoform X2 [Chenopodium quinoa]
miR157d	XM_021870788.1	1	0.5	squamosa promoter-binding protein 1-like isoform X1 [Chenopodium quinoa]
miR157d	XM_021870789.1	1	0.5	squamosa promoter-binding protein 1-like isoform X2 [Chenopodium quinoa]
miR157d	XM_021871804.1	2	1	squamosa promoter-binding-like protein 16 [Chenopodium quinoa]
miR157d	XM_021875189.1	2	1	squamosa promoter-binding-like protein 18 isoform X1 [Chenopodium quinoa]
miR157d	XM_021875197.1	2	1	squamosa promoter-binding-like protein 18 isoform X2 [Chenopodium quinoa]
miR157d	XM_021875206.1	2	1	squamosa promoter-binding-like protein 18 isoform X1 [Chenopodium quinoa]
miR157d	XM_021881727.1	2	2	putative F-box/LRR-repeat protein At4g15060 [Chenopodium quinoa]
miR157d	XM_021881728.1	2	2	putative F-box/LRR-repeat protein At4g15060 [Chenopodium quinoa]
miR157d	XM_021884935.1	1	0.5	squamosa promoter-binding protein 1-like [Chenopodium quinoa]
miR157d	XM_021889412.1	2	1	squamosa promoter-binding-like protein 2 [Chenopodium quinoa]
miR157d	XM_021889421.1	2	1	squamosa promoter-binding-like protein 2 [Chenopodium quinoa]
miR157d	XM_021889619.1	2	1	squamosa promoter-binding-like protein 13A [Chenopodium quinoa]
miR157d	XM_021900841.1	2	1	squamosa promoter-binding-like protein 6 [Chenopodium quinoa]
miR157d	XM_021901492.1	2	1	squamosa promoter-binding-like protein 18 isoform X1 [Chenopodium quinoa]
miR157d	XM_021901493.1	2	1	squamosa promoter-binding-like protein 18 isoform X1 [Chenopodium quinoa]
miR157d	XM_021901494.1	2	1	teosinte glume architecture 1-like isoform X3 [Chenopodium quinoa]
miR157d	XM_021907686.1	3	2	GDSL esterase/lipase At4g28780-like [Chenopodium quinoa]
miR157d	XM_021908323.1	3.5	1.8	uncharacterized protein LOC110728681 [Chenopodium quinoa]
miR157d	XM_021914710.1	2	1	squamosa promoter-binding-like protein 17 [Chenopodium quinoa]
miR157d	XR_002507799.1	2	2	putative F-box/LRR-repeat protein At4g15060 [Chenopodium quinoa]
miR157d	XR_002507800.1	2	2	putative F-box/LRR-repeat protein At4g15060 [Chenopodium quinoa]
miR157d	XR_002507830.1	2	1	-
miR157d	XR_002508412.1	1	0.5	squamosa promoter-binding protein 1-like [Chenopodium quinoa]
miR157d	XR_002511558.1	2	1	squamosa promoter-binding-like protein 18 isoform X1 [Chenopodium quinoa]
miR160	XM_021865744.1	3	2.5	UPF0496 protein At3g19330-like isoform X1 [Chenopodium quinoa]
miR160	XM_021865745.1	3	2.5	UPF0496 protein At3g19330-like isoform X2 [Chenopodium quinoa]
miR160	XM_021872938.1	3	1.5	cytochrome P450 76AD1-like [Chenopodium quinoa]
miR160	XR_002510562.1	0	0	hypothetical protein MANES_10G045100 [Manihot esculenta]
miR160a-5p	XM_021866782.1	1.5	1	auxin response factor 17-like [Chenopodium quinoa]
miR160a-5p	XM_021874932.1	0.5	0.5	auxin response factor 18-like [Chenopodium quinoa]
miR160a-5p	XM_021877437.1	1.5	1	auxin response factor 17-like [Chenopodium quinoa]
miR160a-5p	XM_021892663.1	1.5	1	auxin response factor 17-like [Chenopodium quinoa]
miR160a-5p	XM_021904434.1	0.5	0.5	auxin response factor 18-like [Chenopodium quinoa]
miR160a-5p	XM_021904791.1	1.5	1	auxin response factor 17-like [Chenopodium quinoa]
miR160a-5p	XM_021915345.1	2	1.2	auxin response factor 18-like [Chenopodium quinoa]
miR160a-5p	XM_021915346.1	2	1.2	auxin response factor 18-like [Chenopodium quinoa]
miR160a-5p	XM_021919419.1	2	1.2	auxin response factor 18-like [Chenopodium quinoa]
miR167a-5p	XM_021884773.1	3.5	1.8	P-loop NTPase domain-containing protein LPA1 homolog 2-like [Chenopodium quinoa]
miR167a-5p	XM_021911394.1	3.5	2	protein PAIR1-like isoform X2 [Chenopodium quinoa]
miR167a-5p	XR_002512788.1	2	1	-
miR169h-3p_1	XM_021878490.1	3.5	2.2	interactor of constitutive active ROPs 3-like [Chenopodium quinoa]
miR169h-3p_1	XM_021878491.1	3.5	2.2	interactor of constitutive active ROPs 3-like [Chenopodium quinoa]
miR169h-3p_1	XM_021878492.1	3.5	2.2	interactor of constitutive active ROPs 3-like [Chenopodium quinoa]
miR169h-3p_1	XM_021890240.1	3.5	2.2	interactor of constitutive active ROPs 3-like [Chenopodium quinoa]
miR169h-3p_1	XM_021890241.1	3.5	2.2	interactor of constitutive active ROPs 3-like [Chenopodium quinoa]
miR169h-3p_1	XM_021890242.1	3.5	2.2	interactor of constitutive active ROPs 3-like [Chenopodium quinoa]
miR169h-3p_1	XM_021890243.1	3.5	2.2	interactor of constitutive active ROPs 3-like [Chenopodium quinoa]
miR169h-3p_1	XM_021890244.1	3.5	2.2	interactor of constitutive active ROPs 3-like [Chenopodium quinoa]
miR169h-3p_1	XM_021890245.1	3.5	2.2	interactor of constitutive active ROPs 3-like [Chenopodium quinoa]
miR169h-3p_1	XM_021894157.1	3	2	SURP and G-patch domain-containing protein 1-like protein [Chenopodium quinoa]
miR169h-3p_1	XM_021894158.1	3	2	SURP and G-patch domain-containing protein 1-like protein [Chenopodium quinoa]
miR169h-3p_1	XM_021894159.1	3	2	SURP and G-patch domain-containing protein 1-like protein [Chenopodium quinoa]
miR169h-3p_1	XM_021895342.1	3.5	2.2	uncharacterized protein LOC110716698 [Chenopodium quinoa]
miR169h-3p_1	XM_021896658.1	3.5	2.2	SWI/SNF-related matrix-associated actin-dependent regulator of chromatin subfamily A-like protein 1 [Chenopodium quinoa]
miR169h-3p_1	XM_021902243.1	3.5	2.2	uncharacterized protein LOC110722970 [Chenopodium quinoa]
miR169h-3p_1	XM_021903547.1	2.5	1.8	ribonuclease II, chloroplastic/mitochondrial-like isoform X1 [Chenopodium quinoa]
miR169h-3p_1	XM_021903548.1	2.5	1.8	ribonuclease II, chloroplastic/mitochondrial-like isoform X2 [Chenopodium quinoa]
miR169h-3p_1	XM_021905448.1	2.5	1.8	ribonuclease II, chloroplastic/mitochondrial-like isoform X1 [Chenopodium quinoa]
miR169h-3p_1	XM_021905449.1	2.5	1.8	ribonuclease II, chloroplastic/mitochondrial-like isoform X2 [Chenopodium quinoa]
miR169h-3p_1	XM_021909698.1	3	2	SURP and G-patch domain-containing protein 1-like protein [Chenopodium quinoa]
miR169h-3p_1	XM_021909699.1	3	2	SURP and G-patch domain-containing protein 1-like protein [Chenopodium quinoa]
miR169h-3p_1	XM_021909700.1	3	2	SURP and G-patch domain-containing protein 1-like protein [Chenopodium quinoa]
miR169h-3p_1	XM_021919001.1	3.5	2.2	SWI/SNF-related matrix-associated actin-dependent regulator of chromatin subfamily A-like protein 1 [Chenopodium quinoa]
miR169h-3p_1	XR_002508927.1	3.5	2	histone deacetylase HDT1-like isoform X1 [Chenopodium quinoa]
miR169v_1	XM_021859348.1	2	1.5	nuclear transcription factor Y subunit A-7-like [Chenopodium quinoa]
miR169v_1	XM_021859349.1	2	1.5	nuclear transcription factor Y subunit A-7-like [Chenopodium quinoa]
miR169v_1	XM_021860810.1	2	1.5	nuclear transcription factor Y subunit A-3-like [Chenopodium quinoa]
miR169v_1	XM_021864799.1	2	1.5	nuclear transcription factor Y subunit A-3-like [Chenopodium quinoa]
miR169v_1	XM_021864800.1	2	1.5	nuclear transcription factor Y subunit A-3-like [Chenopodium quinoa]
miR169v_1	XM_021869744.1	3.5	2.5	peroxidase 17-like [Chenopodium quinoa]
miR169v_1	XM_021869745.1	3.5	2.5	peroxidase 17-like [Chenopodium quinoa]
miR169v_1	XM_021873301.1	2	1.5	nuclear transcription factor Y subunit A-1-like isoform X1 [Chenopodium quinoa]
miR169v_1	XM_021873302.1	2	1.5	nuclear transcription factor Y subunit A-1-like isoform X1 [Chenopodium quinoa]
miR169v_1	XM_021873303.1	2	1.5	nuclear transcription factor Y subunit A-1-like isoform X2 [Chenopodium quinoa]
miR169v_1	XM_021883579.1	3	2	nuclear transcription factor Y subunit A-4-like isoform X1 [Chenopodium quinoa]
miR169v_1	XM_021883580.1	3	2	nuclear transcription factor Y subunit A-4-like isoform X2 [Chenopodium quinoa]
miR169v_1	XM_021883581.1	3	2	nuclear transcription factor Y subunit A-4-like isoform X3 [Chenopodium quinoa]
miR169v_1	XM_021894366.1	2	1.5	nuclear transcription factor Y subunit A-7-like isoform X1 [Chenopodium quinoa]
miR169v_1	XM_021894367.1	2	1.5	nuclear transcription factor Y subunit A-7-like isoform X1 [Chenopodium quinoa]
miR169v_1	XM_021902797.1	3.5	2.5	peroxidase 17-like [Chenopodium quinoa]
miR169v_1	XM_021916389.1	2	1.5	nuclear transcription factor Y subunit A-1-like isoform X1 [Chenopodium quinoa]
miR169v_1	XM_021916390.1	2	1.5	nuclear transcription factor Y subunit A-1-like isoform X1 [Chenopodium quinoa]
miR169v_1	XM_021916391.1	2	1.5	nuclear transcription factor Y subunit A-1-like isoform X1 [Chenopodium quinoa]
miR169v_1	XM_021916392.1	2	1.5	nuclear transcription factor Y subunit A-1-like isoform X1 [Chenopodium quinoa]
miR169v_1	XM_021916393.1	2	1.5	nuclear transcription factor Y subunit A-1-like isoform X2 [Chenopodium quinoa]
miR169v_1	XM_021920326.1	2.5	2.5	uncharacterized protein LOC110739844 [Chenopodium quinoa]
miR169v_1	XM_021920327.1	2.5	2.5	uncharacterized protein LOC110739844 [Chenopodium quinoa]
miR169v_1	XR_002511881.1	3	2	nuclear transcription factor Y subunit A-4-like isoform X3 [Chenopodium quinoa]
miR169v_1	XR_002512657.1	3	2	nuclear transcription factor Y subunit A-4-like isoform X3 [Chenopodium quinoa]
miR319c_1	XM_021863548.1	3.5	2.5	RNA exonuclease 4-like [Chenopodium quinoa]
miR319c_1	XM_021872930.1	1.5	2.5	uncharacterized protein LOC110695702 [Chenopodium quinoa]
miR319c_1	XM_021878602.1	3	1.5	transcription factor GAMYB-like [Chenopodium quinoa]
miR319c_1	XM_021878603.1	3	1.5	transcription factor GAMYB-like [Chenopodium quinoa]
miR319c_1	XM_021878604.1	3	1.5	transcription factor GAMYB-like [Chenopodium quinoa]
miR319c_1	XM_021879550.1	3	2	putative BPI/LBP family protein At1g04970 isoform X1 [Chenopodium quinoa]
miR319c_1	XM_021879551.1	3	2	putative BPI/LBP family protein At1g04970 isoform X1 [Chenopodium quinoa]
miR319c_1	XM_021881575.1	2.5	2.5	transcription factor TCP2-like [Chenopodium quinoa]
miR319c_1	XM_021881631.1	2.5	2.5	transcription factor TCP2-like [Chenopodium quinoa]
miR319c_1	XM_021881685.1	2.5	2.5	transcription factor TCP2-like [Chenopodium quinoa]
miR319c_1	XM_021881751.1	2.5	2.5	transcription factor TCP2-like [Chenopodium quinoa]
miR319c_1	XM_021881803.1	2.5	2.5	transcription factor TCP2-like [Chenopodium quinoa]
miR319c_1	XM_021881844.1	2.5	2.5	transcription factor TCP2-like [Chenopodium quinoa]
miR319c_1	XM_021881887.1	2.5	2.5	transcription factor TCP2-like [Chenopodium quinoa]
miR319c_1	XM_021908154.1	2.5	2.5	transcription factor TCP2-like [Chenopodium quinoa]
miR319c_1	XM_021908155.1	2.5	2.5	transcription factor TCP2-like [Chenopodium quinoa]
miR319c_1	XM_021908156.1	2.5	2.5	transcription factor TCP2-like [Chenopodium quinoa]
miR319c_1	XM_021908157.1	2.5	2.5	transcription factor TCP2-like [Chenopodium quinoa]
miR319c_1	XM_021913218.1	2	2.5	uncharacterized protein LOC110733208 isoform X1 [Chenopodium quinoa]
miR319c_1	XM_021914082.1	0.5	2.5	uncharacterized protein LOC110733208 isoform X2 [Chenopodium quinoa]
miR319c_1	XM_021916555.1	3	1.5	transcription factor GAMYB-like [Chenopodium quinoa]
miR319c_1	XM_021916556.1	3	1.5	transcription factor GAMYB-like [Chenopodium quinoa]
miR319c_1	XM_021918063.1	3.5	2.5	RNA exonuclease 4-like isoform X1 [Chenopodium quinoa]
miR319c_1	XM_021918064.1	3.5	2.5	RNA exonuclease 4-like isoform X2 [Chenopodium quinoa]
miR319c_1	XR_002504048.1	3.5	2.5	uncharacterized protein LOC110733208 isoform X1 [Chenopodium quinoa]
miR319c_1	XR_002504049.1	3.5	2.5	uncharacterized protein LOC110733208 isoform X1 [Chenopodium quinoa]
miR319c_2	XM_021872930.1	3.5	2	uncharacterized protein LOC110695702 [Chenopodium quinoa]
miR319c_2	XM_021914082.1	2.5	1.5	uncharacterized protein LOC110733208 isoform X2 [Chenopodium quinoa]
miR319f_1	XM_021861725.1	3	2.2	transcription factor TCP4-like [Chenopodium quinoa]
miR319f_1	XM_021872930.1	1.5	2.5	uncharacterized protein LOC110695702 [Chenopodium quinoa]
miR319f_1	XM_021878602.1	2	1	transcription factor GAMYB-like [Chenopodium quinoa]
miR319f_1	XM_021878603.1	2	1	transcription factor GAMYB-like [Chenopodium quinoa]
miR319f_1	XM_021878604.1	2	1	transcription factor GAMYB-like [Chenopodium quinoa]
miR319f_1	XM_021879550.1	3.5	2.5	putative BPI/LBP family protein At1g04970 isoform X1 [Chenopodium quinoa]
miR319f_1	XM_021879551.1	3.5	2.5	putative BPI/LBP family protein At1g04970 isoform X1 [Chenopodium quinoa]
miR319f_1	XM_021881575.1	2.5	2.2	transcription factor TCP2-like [Chenopodium quinoa]
miR319f_1	XM_021881631.1	2.5	2.2	transcription factor TCP2-like [Chenopodium quinoa]
miR319f_1	XM_021881685.1	2.5	2.2	transcription factor TCP2-like [Chenopodium quinoa]
miR319f_1	XM_021881751.1	2.5	2.2	transcription factor TCP2-like [Chenopodium quinoa]
miR319f_1	XM_021881803.1	2.5	2.2	transcription factor TCP2-like [Chenopodium quinoa]
miR319f_1	XM_021881844.1	2.5	2.2	transcription factor TCP2-like [Chenopodium quinoa]
miR319f_1	XM_021881887.1	2.5	2.2	transcription factor TCP2-like [Chenopodium quinoa]
miR319f_1	XM_021901208.1	3	2.2	transcription factor TCP4-like [Chenopodium quinoa]
miR319f_1	XM_021908154.1	2.5	2.2	transcription factor TCP2-like [Chenopodium quinoa]
miR319f_1	XM_021908155.1	2.5	2.2	transcription factor TCP2-like [Chenopodium quinoa]
miR319f_1	XM_021908156.1	2.5	2.2	transcription factor TCP2-like [Chenopodium quinoa]
miR319f_1	XM_021908157.1	2.5	2.2	transcription factor TCP2-like [Chenopodium quinoa]
miR319f_1	XM_021913218.1	2	2.5	uncharacterized protein LOC110733208 isoform X1 [Chenopodium quinoa]
miR319f_1	XM_021914082.1	0.5	2.5	uncharacterized protein LOC110733208 isoform X2 [Chenopodium quinoa]
miR319f_1	XM_021916555.1	2	1	transcription factor GAMYB-like [Chenopodium quinoa]
miR319f_1	XM_021916556.1	2	1	transcription factor GAMYB-like [Chenopodium quinoa]
miR319f_1	XR_002504048.1	3.5	2.5	uncharacterized protein LOC110733208 isoform X1 [Chenopodium quinoa]
miR319f_1	XR_002504049.1	3.5	2.5	uncharacterized protein LOC110733208 isoform X1 [Chenopodium quinoa]
miR395b_3	XM_021859139.1	2.5	1.5	sulfate transporter 1.2-like [Chenopodium quinoa]
miR395b_3	XM_021873791.1	2.5	1.5	sulfate transporter 1.2-like [Chenopodium quinoa]
miR395b_3	XM_021877758.1	3	2	ribonuclease 2-like isoform X1 [Chenopodium quinoa]
miR395b_3	XM_021877759.1	3	2	ribonuclease 2-like isoform X2 [Chenopodium quinoa]
miR395b_3	XM_021885671.1	3	2	ethylene-responsive transcription factor WIN1-like [Chenopodium quinoa]
miR395b_3	XM_021891718.1	3.5	2	uncharacterized protein LOC110713262 [Chenopodium quinoa]
miR395b_3	XM_021902063.1	2	1	methionine gamma-lyase-like [Chenopodium quinoa]
miR395b_3	XM_021908072.1	2	1	ATP sulfurylase 1, chloroplastic-like [Chenopodium quinoa]
miR395b_3	XM_021908362.1	2	1	ATP sulfurylase 1, chloroplastic-like [Chenopodium quinoa]
miR395b_3	XM_021909730.1	3.5	2	uncharacterized protein LOC110729935 isoform X1 [Chenopodium quinoa]
miR395b_3	XM_021909737.1	3.5	2	uncharacterized protein LOC110729935 isoform X2 [Chenopodium quinoa]
miR395b_3	XM_021909740.1	3.5	2	uncharacterized protein LOC110729935 isoform X3 [Chenopodium quinoa]
miR395b_3	XM_021909743.1	3.5	2	uncharacterized protein LOC110729935 isoform X4 [Chenopodium quinoa]
miR395b_3	XM_021912225.1	3	1.5	methionine gamma-lyase-like [Chenopodium quinoa]
miR395b_3	XM_021912651.1	2.5	2	probable receptor-like protein kinase At1g33260 [Chenopodium quinoa]
miR395b_3	XR_002505090.1	1	0.5	-
miR399b	XM_021870761.1	3.5	1.8	probable ubiquitin-conjugating enzyme E2 24 isoform X1 [Chenopodium quinoa]
miR399b	XM_021870762.1	3.5	1.8	probable ubiquitin-conjugating enzyme E2 24 isoform X1 [Chenopodium quinoa]
miR399b	XM_021870763.1	3.5	1.8	probable ubiquitin-conjugating enzyme E2 24 isoform X1 [Chenopodium quinoa]
miR399b	XM_021884905.1	3.5	1.8	probable ubiquitin-conjugating enzyme E2 24 isoform X1 [Chenopodium quinoa]
miR399b	XM_021884906.1	3.5	1.8	probable ubiquitin-conjugating enzyme E2 24 isoform X1 [Chenopodium quinoa]
miR399b	XM_021884907.1	3.5	1.8	probable ubiquitin-conjugating enzyme E2 24 isoform X1 [Chenopodium quinoa]
miR399b	XM_021913150.1	3	1.5	probable inorganic phosphate transporter 1-7 [Chenopodium quinoa]
miR399b	XM_021914496.1	3	1.5	probable inorganic phosphate transporter 1-7 [Chenopodium quinoa]
miR399b	XR_002510403.1	2.5	1.5	-

## Sheet: target for all miRNAs
miRNA id	Target id	TargetFinder score	TargetFinder NA	psRobot score	psRobot NA	Symbol	GO term	Pathway	NR id	NR evalue	NR description
miR10521	XM_021859140.1	3.5	NA	2.2	NA	XM_021859140.1	-	K14513|1|0.0e+00|2627.4|cqi:110682798|ethylene-insensitive protein 2	XP_021714832.1	0	ethylene-insensitive protein 2-like [Chenopodium quinoa]
miR10521	XM_021859141.1	3.5	NA	2.2	NA	XM_021859141.1	-	K14513|1|0.0e+00|2627.4|cqi:110682798|ethylene-insensitive protein 2	XP_021714832.1	0	ethylene-insensitive protein 2-like [Chenopodium quinoa]
miR10521	XM_021862546.1	3.5	NA	2.5	NA	XM_021862546.1	-	K01322|1|2.6e-11|74.3|csat:104767606|prolyl oligopeptidase [EC:3.4.21.26]!K00423|2|3.8e-07|60.5|egr:104451286|L-ascorbate oxidase [EC:1.10.3.3]	XP_021718237.1	2.6e-264	F-box/FBD/LRR-repeat protein At1g13570-like isoform X1 [Chenopodium quinoa]
miR10521	XM_021864532.1	3.5	NA	2.2	NA	XM_021864532.1	-	-	XP_021720224.1	1.1e-252	uncharacterized protein LOC110687890 [Chenopodium quinoa]
miR10521	XM_021870764.1	3.5	NA	2	NA	XM_021870764.1	-	-	XP_021726456.1	0	uncharacterized protein LOC110693622 [Chenopodium quinoa]
miR10521	XM_021873790.1	3.5	NA	2.2	NA	XM_021873790.1	-	K14513|1|0.0e+00|2634.4|cqi:110696496|ethylene-insensitive protein 2	XP_021729482.1	0	LOW QUALITY PROTEIN: ethylene-insensitive protein 2-like [Chenopodium quinoa]
miR10521	XM_021879955.1	3.5	NA	2.2	NA	XM_021879955.1	-	-	XP_021735647.1	7.2e-115	uncharacterized protein LOC110702248 [Chenopodium quinoa]
miR10521	XM_021883689.1	3.5	NA	2.5	NA	XM_021883689.1	-	K10691|1|0.0e+00|9750.2|cqi:110703418|E3 ubiquitin-protein ligase UBR4 [EC:2.3.2.27]	XP_021739381.1	0	auxin transport protein BIG-like [Chenopodium quinoa]
miR10521	XM_021884908.1	3.5	NA	2	NA	XM_021884908.1	GO:0016021,	-	XP_021740600.1	0	uncharacterized protein LOC110706916 [Chenopodium quinoa]
miR10521	XM_021920741.1	3.5	NA	2.5	NA	XM_021920741.1	-	K14490|1|9.7e-65|250.0|cqi:110740253|histidine-containing phosphotransfer peotein	XP_021776433.1	2.5e-71	histidine-containing phosphotransfer protein 4-like isoform X2 [Chenopodium quinoa]
miR1171	XM_021865888.1	0.5	NA	0.2	NA	XM_021865888.1	-	-	XP_021721580.1	5.1e-104	uncharacterized protein LOC110689159 [Chenopodium quinoa]
miR1171	XM_021868401.1	3.5	NA	1.8	NA	XM_021868401.1	-	K09286|1|5.4e-28|128.3|spen:107022647|EREBP-like factor	XP_021724093.1	1e-157	dehydration-responsive element-binding protein 2F-like [Chenopodium quinoa]
miR1171	XM_021872399.1	2	NA	1.2	NA	XM_021872399.1	GO:0005618,GO:0045330,GO:0004857,GO:0030599,GO:0042545,GO:0045490,	K01051|1|1.3e-96|356.7|smo:SELMODRAFT_420760|pectinesterase [EC:3.1.1.11]	XP_021728091.1	0	probable pectinesterase/pectinesterase inhibitor 51 [Chenopodium quinoa]
miR1171	XM_021885953.1	3.5	NA	2.2	NA	XM_021885953.1	-	K11434|1|1.6e-131|472.2|cqi:110707882|type I protein arginine methyltransferase [EC:2.1.1.319]	XP_021741645.1	8.3e-131	protein arginine N-methyltransferase PRMT10-like [Chenopodium quinoa]
miR1171	XM_021886195.1	3.5	NA	1.8	NA	XM_021886195.1	GO:0016021,GO:0005524,GO:0004672,	K00924|1|2.4e-149|532.7|soe:110791345|kinase [EC:2.7.1.-]	XP_021741887.1	0	leucine-rich repeat receptor-like protein kinase TDR [Chenopodium quinoa]
miR1171	XM_021892443.1	1.5	NA	0.8	NA	XM_021892443.1	-	K04733|1|6.1e-143|511.1|dcr:108219031|interleukin-1 receptor-associated kinase 4 [EC:2.7.11.1]	XP_021748135.1	0	G-type lectin S-receptor-like serine/threonine-protein kinase SD2-2 [Chenopodium quinoa]
miR1171	XM_021892823.1	2.5	NA	1.5	NA	XM_021892823.1	-	K18485|1|1.6e-39|167.5|vvi:100259155|myogenic factor 6!K20558|2|4.0e-35|152.9|var:108331150|transcription factor SPEECHLESS	XP_021748515.1	8.9e-251	transcription factor bHLH57-like isoform X1 [Chenopodium quinoa]
miR1171	XM_021901065.1	3	NA	1.2	NA	XM_021901065.1	-	K22870|1|3.1e-08|63.2|hbr:110651816|zinc finger protein 423	XP_021756757.1	3e-296	uncharacterized protein LOC110721854 isoform X1 [Chenopodium quinoa]
miR1171	XM_021901067.1	3	NA	1.8	NA	XM_021901067.1	-	K15502|1|6.6e-07|58.5|jcu:105645796|serine/threonine-protein phosphatase 6 regulatory ankyrin repeat subunit A!K21440|4|3.3e-06|56.2|cmax:111497807|ankyrin repeat domain-containing protein 50	XP_021756759.1	7.7e-264	uncharacterized protein LOC110721854 isoform X2 [Chenopodium quinoa]
miR1171	XM_021908697.1	3.5	NA	0.8	NA	XM_021908697.1	-	K18626|1|1.4e-129|466.5|psom:113315804|trichohyalin	XP_021764389.1	0	vicilin-like antimicrobial peptides 2-2 [Chenopodium quinoa]
miR1171	XM_021912171.1	3	NA	1.8	NA	XM_021912171.1	-	K02990|1|1.0e-116|422.5|cqi:110732257|small subunit ribosomal protein S6	XP_021767863.1	5.5e-116	30S ribosomal protein S6 alpha, chloroplastic-like [Chenopodium quinoa]
miR1171	XM_021915122.1	0.5	NA	0.2	NA	XM_021915122.1	-	-	XP_021770814.1	7.6e-104	uncharacterized protein LOC110735001 [Chenopodium quinoa]
miR1436	XM_021862925.1	3	NA	1.5	NA	XM_021862925.1	-	K21952|1|1.7e-13|81.3|vcn:VOLCADRAFT_94396|CASK-interacting protein	XP_021718617.1	4.9e-272	uncharacterized protein LOC110686333 isoform X1 [Chenopodium quinoa]
miR1436	XM_021862929.1	3	NA	1.5	NA	XM_021862929.1	-	K21952|1|1.7e-13|81.3|vcn:VOLCADRAFT_94396|CASK-interacting protein	XP_021718617.1	4.9e-272	uncharacterized protein LOC110686333 isoform X1 [Chenopodium quinoa]
miR1436	XM_021862933.1	3	NA	1.5	NA	XM_021862933.1	-	K21952|1|1.7e-13|81.3|vcn:VOLCADRAFT_94396|CASK-interacting protein	XP_021718617.1	4.8e-272	uncharacterized protein LOC110686333 isoform X1 [Chenopodium quinoa]
miR1436	XM_021862940.1	3	NA	1.5	NA	XM_021862940.1	-	K21952|1|1.7e-13|81.3|vcn:VOLCADRAFT_94396|CASK-interacting protein	XP_021718632.1	1.4e-271	uncharacterized protein LOC110686333 isoform X2 [Chenopodium quinoa]
miR1436	XM_021865473.1	3.5	NA	2	NA	XM_021865473.1	-	K10352|1|1.3e-90|338.2|ppp:112275982|myosin heavy chain	XP_021721165.1	0	filament-like plant protein 4 isoform X1 [Chenopodium quinoa]
miR1436	XM_021870202.1	2	NA	1.5	NA	XM_021870202.1	-	K03006|1|1.2e-23|115.2|sot:102589385|DNA-directed RNA polymerase II subunit RPB1 [EC:2.7.7.6]	XP_021725894.1	1.2e-154	activating signal cointegrator 1-like [Chenopodium quinoa]
miR1436	XM_021870575.1	2.5	NA	1.5	NA	XM_021870575.1	-	K17964|1|1.4e-70|270.0|cmo:103485315|leucine-rich PPR motif-containing protein, mitochondrial	XP_021719453.1	3.3e-214	pentatricopeptide repeat-containing protein At1g55890, mitochondrial-like [Chenopodium quinoa]
miR1436	XM_021876288.1	3	NA	1.8	NA	XM_021876288.1	-	K22312|1|9.6e-189|662.9|cqi:110698765|hydroxyjasmonate sulfotransferase [EC:2.8.2.39]	XP_021731980.1	5.1e-188	cytosolic sulfotransferase 15-like [Chenopodium quinoa]
miR1436	XM_021902385.1	3.5	NA	1.8	NA	XM_021902385.1	-	K00028|1|5.7e-11|72.4|aip:107615028|malate dehydrogenase (decarboxylating) [EC:1.1.1.39]!K14564|2|1.0e-07|61.6|dcr:108225321|nucleolar protein 56	XP_021758077.1	8.2e-141	uncharacterized protein LOC110723092 isoform X1 [Chenopodium quinoa]
miR1436	XM_021902386.1	3.5	NA	1.8	NA	XM_021902386.1	-	K00028|1|6.0e-11|72.4|aip:107615028|malate dehydrogenase (decarboxylating) [EC:1.1.1.39]!K14564|2|1.1e-07|61.6|dcr:108225321|nucleolar protein 56	XP_021758078.1	4.7e-139	uncharacterized protein LOC110723092 isoform X2 [Chenopodium quinoa]
miR1436	XM_021918797.1	2.5	NA	1.5	NA	XM_021918797.1	GO:0016787,	K07766|1|2.0e-104|382.9|cqi:110738407|diphosphoinositol-polyphosphate diphosphatase [EC:3.6.1.52]	XP_021774489.1	1.1e-103	nudix hydrolase 16, mitochondrial-like [Chenopodium quinoa]
miR1436	XR_002505039.1	3.5	NA	2	NA	XR_002505039.1	-	-	-	-	-
miR1436	XR_002505454.1	3	NA	1.5	NA	XR_002505454.1	-	-	XP_021837769.1	4e-06	uncharacterized protein LOC110777470, partial [Spinacia oleracea]
miR1436	XR_002509105.1	3.5	NA	2	NA	XR_002509105.1	-	K18121|1|2.9e-14|83.6|mdm:103453571|glyoxylate/succinic semialdehyde reductase [EC:1.1.1.79 1.1.1.-]	XP_021765087.1	7.6e-29	U-box domain-containing protein 33-like isoform X1 [Chenopodium quinoa]
miR1436	XR_002509106.1	3.5	NA	2	NA	XR_002509106.1	-	K18121|1|2.6e-14|83.6|pmum:103327691|glyoxylate/succinic semialdehyde reductase [EC:1.1.1.79 1.1.1.-]	XP_021765088.1	6.9e-29	U-box domain-containing protein 33-like isoform X2 [Chenopodium quinoa]
miR1436	XR_002509107.1	3.5	NA	2	NA	XR_002509107.1	-	K18121|1|8.4e-14|82.0|pper:18782190|glyoxylate/succinic semialdehyde reductase [EC:1.1.1.79 1.1.1.-]	XP_021765087.1	7.6e-29	U-box domain-containing protein 33-like isoform X1 [Chenopodium quinoa]
miR1436	XR_002509108.1	3.5	NA	2	NA	XR_002509108.1	-	K18121|1|2.8e-14|83.6|mdm:103453571|glyoxylate/succinic semialdehyde reductase [EC:1.1.1.79 1.1.1.-]	XP_021765088.1	7.4e-29	U-box domain-containing protein 33-like isoform X2 [Chenopodium quinoa]
miR1436	XR_002509109.1	3.5	NA	2	NA	XR_002509109.1	-	K18121|1|2.6e-14|83.6|mdm:103453571|glyoxylate/succinic semialdehyde reductase [EC:1.1.1.79 1.1.1.-]	XP_021765087.1	6.8e-29	U-box domain-containing protein 33-like isoform X1 [Chenopodium quinoa]
miR1436	XR_002509110.1	3.5	NA	2	NA	XR_002509110.1	-	K18121|1|2.8e-14|83.6|mdm:103453571|glyoxylate/succinic semialdehyde reductase [EC:1.1.1.79 1.1.1.-]	XP_021765087.1	7.3e-29	U-box domain-containing protein 33-like isoform X1 [Chenopodium quinoa]
miR156_2	XM_021857955.1	2	NA	1	NA	XM_021857955.1	-	K13415|1|2.1e-18|97.1|mdm:103401427|protein brassinosteroid insensitive 1 [EC:2.7.10.1 2.7.11.1]!K20641|2|4.6e-13|79.3|cvr:CHLNCDRAFT_59250|Rho GTPase-activating protein 20	XP_021713647.1	2.1e-205	squamosa promoter-binding-like protein 16 isoform X1 [Chenopodium quinoa]
miR156_2	XM_021857956.1	2	NA	1	NA	XM_021857956.1	-	K13415|1|2.1e-18|97.1|mdm:103401427|protein brassinosteroid insensitive 1 [EC:2.7.10.1 2.7.11.1]!K20641|2|4.6e-13|79.3|cvr:CHLNCDRAFT_59250|Rho GTPase-activating protein 20	XP_021713648.1	6.1e-205	squamosa promoter-binding-like protein 16 isoform X2 [Chenopodium quinoa]
miR156_2	XM_021862675.1	2.5	NA	1.2	NA	XM_021862675.1	-	K13415|1|2.2e-17|93.6|mdm:103401427|protein brassinosteroid insensitive 1 [EC:2.7.10.1 2.7.11.1]!K20641|2|1.6e-12|77.4|cvr:CHLNCDRAFT_59250|Rho GTPase-activating protein 20	XP_021718367.1	3e-246	squamosa promoter-binding-like protein 6 isoform X1 [Chenopodium quinoa]
miR156_2	XM_021862676.1	2.5	NA	1.2	NA	XM_021862676.1	-	K13415|1|2.3e-17|93.6|mdm:103401427|protein brassinosteroid insensitive 1 [EC:2.7.10.1 2.7.11.1]!K20641|2|1.7e-12|77.4|cvr:CHLNCDRAFT_59250|Rho GTPase-activating protein 20	XP_021718368.1	3.1e-238	squamosa promoter-binding-like protein 6 isoform X2 [Chenopodium quinoa]
miR156_2	XM_021866222.1	3.5	NA	2	NA	XM_021866222.1	-	K11344|1|9.6e-69|263.1|cqi:110689433|chromatin modification-related protein EAF6	XP_021721914.1	5.1e-68	chromatin modification-related protein MEAF6-like isoform X1 [Chenopodium quinoa]
miR156_2	XM_021867382.1	3	NA	1.5	NA	XM_021867382.1	GO:0005634,GO:0003677,GO:0046872,	K13415|1|8.7e-17|91.3|mdm:103401427|protein brassinosteroid insensitive 1 [EC:2.7.10.1 2.7.11.1]!K20641|2|2.1e-10|70.1|cvr:CHLNCDRAFT_59250|Rho GTPase-activating protein 20	XP_021723074.1	6.7e-233	squamosa promoter-binding-like protein 13A [Chenopodium quinoa]
miR156_2	XM_021867383.1	3	NA	1.5	NA	XM_021867383.1	GO:0005634,GO:0003677,GO:0046872,	K13415|1|9.5e-17|91.3|mdm:103401427|protein brassinosteroid insensitive 1 [EC:2.7.10.1 2.7.11.1]!K20641|2|2.3e-10|70.1|cvr:CHLNCDRAFT_59250|Rho GTPase-activating protein 20	XP_021723074.1	7.3e-233	squamosa promoter-binding-like protein 13A [Chenopodium quinoa]
miR156_2	XM_021867384.1	3	NA	1.5	NA	XM_021867384.1	GO:0005634,GO:0003677,GO:0046872,	K13415|1|8.1e-17|91.3|mdm:103401427|protein brassinosteroid insensitive 1 [EC:2.7.10.1 2.7.11.1]!K20641|2|1.9e-10|70.1|cvr:CHLNCDRAFT_59250|Rho GTPase-activating protein 20	XP_021723074.1	6.3e-233	squamosa promoter-binding-like protein 13A [Chenopodium quinoa]
miR156_2	XM_021867403.1	2	NA	1	NA	XM_021867403.1	-	K13415|1|1.3e-18|97.8|mdm:103401427|protein brassinosteroid insensitive 1 [EC:2.7.10.1 2.7.11.1]!K20641|2|1.9e-14|84.0|cvr:CHLNCDRAFT_59250|Rho GTPase-activating protein 20	XP_021723095.1	1.6e-269	squamosa promoter-binding-like protein 2 [Chenopodium quinoa]
miR156_2	XM_021867404.1	2	NA	1	NA	XM_021867404.1	-	K13415|1|1.9e-18|97.8|mdm:103401427|protein brassinosteroid insensitive 1 [EC:2.7.10.1 2.7.11.1]!K20641|2|2.8e-14|84.0|cvr:CHLNCDRAFT_59250|Rho GTPase-activating protein 20	XP_021723095.1	2.3e-269	squamosa promoter-binding-like protein 2 [Chenopodium quinoa]
miR156_2	XM_021868311.1	2	NA	1	NA	XM_021868311.1	-	K13415|1|3.5e-18|95.9|mdm:103401427|protein brassinosteroid insensitive 1 [EC:2.7.10.1 2.7.11.1]!K20641|2|1.8e-14|83.6|cvr:CHLNCDRAFT_59250|Rho GTPase-activating protein 20	XP_021724003.1	1.3e-223	squamosa promoter-binding-like protein 17 isoform X1 [Chenopodium quinoa]
miR156_2	XM_021868312.1	2	NA	1	NA	XM_021868312.1	-	K13415|1|3.4e-18|95.9|mdm:103401427|protein brassinosteroid insensitive 1 [EC:2.7.10.1 2.7.11.1]!K20641|2|1.8e-14|83.6|cvr:CHLNCDRAFT_59250|Rho GTPase-activating protein 20	XP_021724004.1	3.6e-215	squamosa promoter-binding-like protein 17 isoform X2 [Chenopodium quinoa]
miR156_2	XM_021870788.1	0	NA	0	NA	XM_021870788.1	-	K13415|1|5.3e-17|91.3|mdm:103401427|protein brassinosteroid insensitive 1 [EC:2.7.10.1 2.7.11.1]!K20641|2|1.0e-07|60.5|cvr:CHLNCDRAFT_59250|Rho GTPase-activating protein 20	XP_021726480.1	7.3e-73	squamosa promoter-binding protein 1-like isoform X1 [Chenopodium quinoa]
miR156_2	XM_021870789.1	0	NA	0	NA	XM_021870789.1	-	K13415|1|5.4e-21|104.4|mdm:103401427|protein brassinosteroid insensitive 1 [EC:2.7.10.1 2.7.11.1]!K20641|2|1.0e-11|73.6|cvr:CHLNCDRAFT_59250|Rho GTPase-activating protein 20	XP_021726481.1	5e-57	squamosa promoter-binding protein 1-like isoform X2 [Chenopodium quinoa]
miR156_2	XM_021871804.1	2	NA	1	NA	XM_021871804.1	-	K13415|1|3.0e-18|96.7|mdm:103401427|protein brassinosteroid insensitive 1 [EC:2.7.10.1 2.7.11.1]!K20641|2|2.3e-13|80.5|cvr:CHLNCDRAFT_59250|Rho GTPase-activating protein 20	XP_021727496.1	2.5e-204	squamosa promoter-binding-like protein 16 [Chenopodium quinoa]
miR156_2	XM_021875189.1	3	NA	1.5	NA	XM_021875189.1	-	K13415|1|1.6e-16|91.3|mdm:103401427|protein brassinosteroid insensitive 1 [EC:2.7.10.1 2.7.11.1]!K20641|2|3.3e-14|83.6|cvr:CHLNCDRAFT_59250|Rho GTPase-activating protein 20	XP_021730881.1	0	squamosa promoter-binding-like protein 18 isoform X1 [Chenopodium quinoa]
miR156_2	XM_021875197.1	3	NA	1.5	NA	XM_021875197.1	-	K13415|1|1.5e-16|91.3|mdm:103401427|protein brassinosteroid insensitive 1 [EC:2.7.10.1 2.7.11.1]!K20641|2|3.2e-14|83.6|cvr:CHLNCDRAFT_59250|Rho GTPase-activating protein 20	XP_021730889.1	0	squamosa promoter-binding-like protein 18 isoform X2 [Chenopodium quinoa]
miR156_2	XM_021875206.1	3	NA	1.5	NA	XM_021875206.1	-	K13415|1|1.3e-16|91.3|mdm:103401427|protein brassinosteroid insensitive 1 [EC:2.7.10.1 2.7.11.1]!K20641|2|2.6e-14|83.6|cvr:CHLNCDRAFT_59250|Rho GTPase-activating protein 20	XP_021730881.1	4.8e-272	squamosa promoter-binding-like protein 18 isoform X1 [Chenopodium quinoa]
miR156_2	XM_021877549.1	3.5	NA	1.8	NA	XM_021877549.1	GO:0009507,GO:0005737,GO:0003949,GO:0000105,GO:0000162,	K01814|1|6.0e-164|580.5|cqi:110700053|phosphoribosylformimino-5-aminoimidazole carboxamide ribotide isomerase [EC:5.3.1.16]	XP_021733241.1	3.2e-163	1-(5-phosphoribosyl)-5-[(5-phosphoribosylamino)methylideneamino] imidazole-4-carboxamide isomerase, chloroplastic-like isoform X1 [Chenopodium quinoa]
miR156_2	XM_021877550.1	3.5	NA	1.8	NA	XM_021877550.1	GO:0009507,GO:0005737,GO:0003949,GO:0000105,GO:0000162,	K01814|1|1.2e-159|566.2|cqi:110700053|phosphoribosylformimino-5-aminoimidazole carboxamide ribotide isomerase [EC:5.3.1.16]	XP_021733242.1	1.1e-160	1-(5-phosphoribosyl)-5-[(5-phosphoribosylamino)methylideneamino] imidazole-4-carboxamide isomerase, chloroplastic-like isoform X2 [Chenopodium quinoa]
miR156_2	XM_021881727.1	3	NA	1.5	NA	XM_021881727.1	-	K00423|1|4.1e-21|105.9|egr:104451286|L-ascorbate oxidase [EC:1.10.3.3]!K05350|2|8.9e-08|61.6|nnu:104604855|beta-glucosidase [EC:3.2.1.21]	XP_021737419.1	4.3e-218	putative F-box/LRR-repeat protein At4g15060 [Chenopodium quinoa]
miR156_2	XM_021881728.1	3	NA	1.5	NA	XM_021881728.1	-	K00423|1|4.1e-21|105.9|egr:104451286|L-ascorbate oxidase [EC:1.10.3.3]!K05350|2|8.9e-08|61.6|nnu:104604855|beta-glucosidase [EC:3.2.1.21]	XP_021737419.1	4.3e-218	putative F-box/LRR-repeat protein At4g15060 [Chenopodium quinoa]
miR156_2	XM_021884935.1	0	NA	0	NA	XM_021884935.1	-	K13415|1|3.6e-16|88.6|mdm:103401427|protein brassinosteroid insensitive 1 [EC:2.7.10.1 2.7.11.1]!K20641|2|4.0e-07|58.5|cvr:CHLNCDRAFT_59250|Rho GTPase-activating protein 20	XP_021740627.1	2.4e-71	squamosa promoter-binding protein 1-like [Chenopodium quinoa]
miR156_2	XM_021889412.1	2	NA	1	NA	XM_021889412.1	-	K13415|1|1.0e-18|98.2|mdm:103401427|protein brassinosteroid insensitive 1 [EC:2.7.10.1 2.7.11.1]!K20641|2|9.0e-15|85.1|cvr:CHLNCDRAFT_59250|Rho GTPase-activating protein 20	XP_021745104.1	6.4e-269	squamosa promoter-binding-like protein 2 [Chenopodium quinoa]
miR156_2	XM_021889421.1	2	NA	1	NA	XM_021889421.1	-	K13415|1|1.3e-18|98.2|mdm:103401427|protein brassinosteroid insensitive 1 [EC:2.7.10.1 2.7.11.1]!K20641|2|1.2e-14|85.1|cvr:CHLNCDRAFT_59250|Rho GTPase-activating protein 20	XP_021745104.1	8.4e-269	squamosa promoter-binding-like protein 2 [Chenopodium quinoa]
miR156_2	XM_021889619.1	3	NA	1.5	NA	XM_021889619.1	GO:0005634,GO:0003677,GO:0046872,	K13415|1|4.8e-16|89.4|mdm:103401427|protein brassinosteroid insensitive 1 [EC:2.7.10.1 2.7.11.1]!K20641|2|5.1e-10|69.3|cvr:CHLNCDRAFT_59250|Rho GTPase-activating protein 20	XP_021745311.1	9e-255	squamosa promoter-binding-like protein 13A [Chenopodium quinoa]
miR156_2	XM_021893196.1	3.5	NA	2	NA	XM_021893196.1	-	-	XP_021748888.1	0	mediator of RNA polymerase II transcription subunit 12-like [Chenopodium quinoa]
miR156_2	XM_021893197.1	3.5	NA	2	NA	XM_021893197.1	-	-	XP_021748888.1	0	mediator of RNA polymerase II transcription subunit 12-like [Chenopodium quinoa]
miR156_2	XM_021896366.1	3.5	NA	2	NA	XM_021896366.1	-	K11344|1|1.6e-75|286.2|cqi:110717619|chromatin modification-related protein EAF6	XP_021752058.1	8.3e-75	chromatin modification-related protein MEAF6-like isoform X1 [Chenopodium quinoa]
miR156_2	XM_021896367.1	3.5	NA	2	NA	XM_021896367.1	-	K11344|1|6.4e-68|260.8|cqi:110689433|chromatin modification-related protein EAF6	XP_021752059.1	1.2e-67	chromatin modification-related protein MEAF6-like isoform X2 [Chenopodium quinoa]
miR156_2	XM_021900841.1	2.5	NA	1.2	NA	XM_021900841.1	-	K13415|1|5.2e-16|89.0|mdm:103401427|protein brassinosteroid insensitive 1 [EC:2.7.10.1 2.7.11.1]!K20641|2|1.2e-12|77.8|cvr:CHLNCDRAFT_59250|Rho GTPase-activating protein 20	XP_021756533.1	2.9e-246	squamosa promoter-binding-like protein 6 [Chenopodium quinoa]
miR156_2	XM_021901492.1	3	NA	1.5	NA	XM_021901492.1	-	K13415|1|1.3e-16|91.3|mdm:103401427|protein brassinosteroid insensitive 1 [EC:2.7.10.1 2.7.11.1]!K20641|2|1.3e-13|81.3|cvr:CHLNCDRAFT_59250|Rho GTPase-activating protein 20	XP_021757184.1	0	squamosa promoter-binding-like protein 18 isoform X1 [Chenopodium quinoa]
miR156_2	XM_021901493.1	3	NA	1.5	NA	XM_021901493.1	-	K13415|1|1.4e-16|91.3|mdm:103401427|protein brassinosteroid insensitive 1 [EC:2.7.10.1 2.7.11.1]!K20641|2|1.4e-13|81.3|cvr:CHLNCDRAFT_59250|Rho GTPase-activating protein 20	XP_021757184.1	0	squamosa promoter-binding-like protein 18 isoform X1 [Chenopodium quinoa]
miR156_2	XM_021901494.1	3	NA	1.5	NA	XM_021901494.1	-	K13415|1|1.2e-16|91.3|mdm:103401427|protein brassinosteroid insensitive 1 [EC:2.7.10.1 2.7.11.1]!K20641|2|1.2e-13|81.3|cvr:CHLNCDRAFT_59250|Rho GTPase-activating protein 20	XP_021757186.1	3.4e-304	teosinte glume architecture 1-like isoform X3 [Chenopodium quinoa]
miR156_2	XM_021908323.1	3.5	NA	2	NA	XM_021908323.1	-	K18195|1|1.0e-23|113.6|thj:104807150|rhamnogalacturonan endolyase [EC:4.2.2.23]!K22804|2|1.8e-15|86.3|bna:106442438|structural maintenance of chromosomes protein 6!K02641|3|5.7e-14|81.3|jre:108997663|ferredoxin--NADP+ reductase [EC:1.18.1.2]!K14297|4|1.5e-06|56.6|nsy:104215433|nuclear pore complex protein Nup98-Nup96	XP_021764015.1	1.3e-202	uncharacterized protein LOC110728681 [Chenopodium quinoa]
miR156_2	XM_021908976.1	3	NA	1.5	NA	XM_021908976.1	-	K03231|1|1.7e-39|166.8|mtr:MTR_8g008740|elongation factor 1-alpha!K09527|2|6.0e-16|88.6|lsv:111888013|DnaJ homolog subfamily C member 7!K10352|4|3.4e-11|72.8|mus:103974110|myosin heavy chain	XP_021764668.1	4.5e-219	interactor of constitutive active ROPs 4-like [Chenopodium quinoa]
miR156_2	XM_021908977.1	3	NA	1.5	NA	XM_021908977.1	-	K03231|1|1.7e-39|166.8|mtr:MTR_8g008740|elongation factor 1-alpha!K09527|2|6.0e-16|88.6|lsv:111888013|DnaJ homolog subfamily C member 7!K10352|4|3.4e-11|72.8|mus:103974110|myosin heavy chain	XP_021764668.1	4.5e-219	interactor of constitutive active ROPs 4-like [Chenopodium quinoa]
miR156_2	XM_021911384.1	3.5	NA	2	NA	XM_021911384.1	-	-	XP_021767076.1	0	mediator of RNA polymerase II transcription subunit 12-like [Chenopodium quinoa]
miR156_2	XM_021911385.1	3.5	NA	2	NA	XM_021911385.1	-	-	XP_021767076.1	0	mediator of RNA polymerase II transcription subunit 12-like [Chenopodium quinoa]
miR156_2	XM_021911386.1	3.5	NA	2	NA	XM_021911386.1	-	-	XP_021767076.1	0	mediator of RNA polymerase II transcription subunit 12-like [Chenopodium quinoa]
miR156_2	XM_021911387.1	3.5	NA	2	NA	XM_021911387.1	-	-	XP_021767076.1	0	mediator of RNA polymerase II transcription subunit 12-like [Chenopodium quinoa]
miR156_2	XM_021911388.1	3.5	NA	2	NA	XM_021911388.1	-	-	XP_021767076.1	0	mediator of RNA polymerase II transcription subunit 12-like [Chenopodium quinoa]
miR156_2	XM_021914403.1	2.5	NA	1.2	NA	XM_021914403.1	-	K08737|1|0.0e+00|2590.8|cqi:110734307|DNA mismatch repair protein MSH6	XP_021770095.1	0	DNA mismatch repair protein MSH6-like isoform X1 [Chenopodium quinoa]
miR156_2	XM_021914404.1	2.5	NA	1.2	NA	XM_021914404.1	-	K08737|1|0.0e+00|2584.3|cqi:110734307|DNA mismatch repair protein MSH6	XP_021770096.1	0	DNA mismatch repair protein MSH6-like isoform X2 [Chenopodium quinoa]
miR156_2	XM_021914710.1	2	NA	1	NA	XM_021914710.1	-	K13415|1|4.6e-18|95.9|mdm:103401427|protein brassinosteroid insensitive 1 [EC:2.7.10.1 2.7.11.1]!K20641|2|2.4e-14|83.6|cvr:CHLNCDRAFT_59250|Rho GTPase-activating protein 20	XP_021770402.1	8.2e-223	squamosa promoter-binding-like protein 17 [Chenopodium quinoa]
miR156_2	XM_021920154.1	3.5	NA	2.2	NA	XM_021920154.1	-	K01726|1|5.2e-150|533.5|cqi:110739696|gamma-carbonic anhydrase [EC:4.2.1.-]	XP_021775846.1	2.8e-149	gamma carbonic anhydrase-like 2, mitochondrial [Chenopodium quinoa]
miR156_2	XR_002507799.1	3	NA	1.5	NA	XR_002507799.1	-	K00423|1|5.4e-21|105.9|egr:104451286|L-ascorbate oxidase [EC:1.10.3.3]!K05350|2|1.2e-07|61.6|nnu:104604855|beta-glucosidase [EC:3.2.1.21]!K10393|3|1.7e-06|57.8|nta:107828690|kinesin family member 2/24	XP_021737419.1	5.7e-210	putative F-box/LRR-repeat protein At4g15060 [Chenopodium quinoa]
miR156_2	XR_002507800.1	3	NA	1.5	NA	XR_002507800.1	-	K00423|1|4.1e-21|105.9|egr:104451286|L-ascorbate oxidase [EC:1.10.3.3]!K05350|2|8.9e-08|61.6|nnu:104604855|beta-glucosidase [EC:3.2.1.21]	XP_021737419.1	2.1e-180	putative F-box/LRR-repeat protein At4g15060 [Chenopodium quinoa]
miR156_2	XR_002507830.1	3	NA	1.5	NA	XR_002507830.1	-	-	-	-	-
miR156_2	XR_002508412.1	0	NA	0	NA	XR_002508412.1	-	K13415|1|1.5e-08|62.8|mdm:103401427|protein brassinosteroid insensitive 1 [EC:2.7.10.1 2.7.11.1]	XP_021740627.1	3.8e-34	squamosa promoter-binding protein 1-like [Chenopodium quinoa]
miR156_2	XR_002511558.1	3	NA	1.5	NA	XR_002511558.1	-	K13415|1|1.2e-16|91.3|mdm:103401427|protein brassinosteroid insensitive 1 [EC:2.7.10.1 2.7.11.1]!K20641|2|1.3e-13|81.3|cvr:CHLNCDRAFT_59250|Rho GTPase-activating protein 20	XP_021757184.1	1.1e-302	squamosa promoter-binding-like protein 18 isoform X1 [Chenopodium quinoa]
miR156b-3p_6	XM_021908184.1	3.5	NA	2.5	NA	XM_021908184.1	-	K15902|1|1.6e-45|186.0|cqi:110728541|EKC/KEOPS complex subunit PCC1/LAGE3	XP_021763876.1	8.6e-45	uncharacterized protein LOC110728541 [Chenopodium quinoa]
miR156c	XM_021857955.1	0	NA	0	NA	XM_021857955.1	-	K13415|1|2.1e-18|97.1|mdm:103401427|protein brassinosteroid insensitive 1 [EC:2.7.10.1 2.7.11.1]!K20641|2|4.6e-13|79.3|cvr:CHLNCDRAFT_59250|Rho GTPase-activating protein 20	XP_021713647.1	2.1e-205	squamosa promoter-binding-like protein 16 isoform X1 [Chenopodium quinoa]
miR156c	XM_021857956.1	0	NA	0	NA	XM_021857956.1	-	K13415|1|2.1e-18|97.1|mdm:103401427|protein brassinosteroid insensitive 1 [EC:2.7.10.1 2.7.11.1]!K20641|2|4.6e-13|79.3|cvr:CHLNCDRAFT_59250|Rho GTPase-activating protein 20	XP_021713648.1	6.1e-205	squamosa promoter-binding-like protein 16 isoform X2 [Chenopodium quinoa]
miR156c	XM_021862675.1	0.5	NA	0.2	NA	XM_021862675.1	-	K13415|1|2.2e-17|93.6|mdm:103401427|protein brassinosteroid insensitive 1 [EC:2.7.10.1 2.7.11.1]!K20641|2|1.6e-12|77.4|cvr:CHLNCDRAFT_59250|Rho GTPase-activating protein 20	XP_021718367.1	3e-246	squamosa promoter-binding-like protein 6 isoform X1 [Chenopodium quinoa]
miR156c	XM_021862676.1	0.5	NA	0.2	NA	XM_021862676.1	-	K13415|1|2.3e-17|93.6|mdm:103401427|protein brassinosteroid insensitive 1 [EC:2.7.10.1 2.7.11.1]!K20641|2|1.7e-12|77.4|cvr:CHLNCDRAFT_59250|Rho GTPase-activating protein 20	XP_021718368.1	3.1e-238	squamosa promoter-binding-like protein 6 isoform X2 [Chenopodium quinoa]
miR156c	XM_021863611.1	3	NA	2	NA	XM_021863611.1	-	K13415|1|2.1e-21|106.3|mdm:103401427|protein brassinosteroid insensitive 1 [EC:2.7.10.1 2.7.11.1]	XP_021719303.1	3.6e-128	squamosa promoter-binding-like protein 3 [Chenopodium quinoa]
miR156c	XM_021865585.1	3.5	NA	1.8	NA	XM_021865585.1	-	K22855|1|1.4e-145|518.5|cqi:110688830|EEF1A lysine methyltransferase 1 [EC:2.1.1.-]	XP_021721277.1	7.6e-145	EEF1A lysine methyltransferase 1-like [Chenopodium quinoa]
miR156c	XM_021867382.1	1	NA	0.5	NA	XM_021867382.1	GO:0005634,GO:0003677,GO:0046872,	K13415|1|8.7e-17|91.3|mdm:103401427|protein brassinosteroid insensitive 1 [EC:2.7.10.1 2.7.11.1]!K20641|2|2.1e-10|70.1|cvr:CHLNCDRAFT_59250|Rho GTPase-activating protein 20	XP_021723074.1	6.7e-233	squamosa promoter-binding-like protein 13A [Chenopodium quinoa]
miR156c	XM_021867383.1	1	NA	0.5	NA	XM_021867383.1	GO:0005634,GO:0003677,GO:0046872,	K13415|1|9.5e-17|91.3|mdm:103401427|protein brassinosteroid insensitive 1 [EC:2.7.10.1 2.7.11.1]!K20641|2|2.3e-10|70.1|cvr:CHLNCDRAFT_59250|Rho GTPase-activating protein 20	XP_021723074.1	7.3e-233	squamosa promoter-binding-like protein 13A [Chenopodium quinoa]
miR156c	XM_021867384.1	1	NA	0.5	NA	XM_021867384.1	GO:0005634,GO:0003677,GO:0046872,	K13415|1|8.1e-17|91.3|mdm:103401427|protein brassinosteroid insensitive 1 [EC:2.7.10.1 2.7.11.1]!K20641|2|1.9e-10|70.1|cvr:CHLNCDRAFT_59250|Rho GTPase-activating protein 20	XP_021723074.1	6.3e-233	squamosa promoter-binding-like protein 13A [Chenopodium quinoa]
miR156c	XM_021867403.1	0	NA	0	NA	XM_021867403.1	-	K13415|1|1.3e-18|97.8|mdm:103401427|protein brassinosteroid insensitive 1 [EC:2.7.10.1 2.7.11.1]!K20641|2|1.9e-14|84.0|cvr:CHLNCDRAFT_59250|Rho GTPase-activating protein 20	XP_021723095.1	1.6e-269	squamosa promoter-binding-like protein 2 [Chenopodium quinoa]
miR156c	XM_021867404.1	0	NA	0	NA	XM_021867404.1	-	K13415|1|1.9e-18|97.8|mdm:103401427|protein brassinosteroid insensitive 1 [EC:2.7.10.1 2.7.11.1]!K20641|2|2.8e-14|84.0|cvr:CHLNCDRAFT_59250|Rho GTPase-activating protein 20	XP_021723095.1	2.3e-269	squamosa promoter-binding-like protein 2 [Chenopodium quinoa]
miR156c	XM_021868311.1	0	NA	0	NA	XM_021868311.1	-	K13415|1|3.5e-18|95.9|mdm:103401427|protein brassinosteroid insensitive 1 [EC:2.7.10.1 2.7.11.1]!K20641|2|1.8e-14|83.6|cvr:CHLNCDRAFT_59250|Rho GTPase-activating protein 20	XP_021724003.1	1.3e-223	squamosa promoter-binding-like protein 17 isoform X1 [Chenopodium quinoa]
miR156c	XM_021868312.1	0	NA	0	NA	XM_021868312.1	-	K13415|1|3.4e-18|95.9|mdm:103401427|protein brassinosteroid insensitive 1 [EC:2.7.10.1 2.7.11.1]!K20641|2|1.8e-14|83.6|cvr:CHLNCDRAFT_59250|Rho GTPase-activating protein 20	XP_021724004.1	3.6e-215	squamosa promoter-binding-like protein 17 isoform X2 [Chenopodium quinoa]
miR156c	XM_021870788.1	3	NA	1.5	NA	XM_021870788.1	-	K13415|1|5.3e-17|91.3|mdm:103401427|protein brassinosteroid insensitive 1 [EC:2.7.10.1 2.7.11.1]!K20641|2|1.0e-07|60.5|cvr:CHLNCDRAFT_59250|Rho GTPase-activating protein 20	XP_021726480.1	7.3e-73	squamosa promoter-binding protein 1-like isoform X1 [Chenopodium quinoa]
miR156c	XM_021870789.1	3	NA	1.5	NA	XM_021870789.1	-	K13415|1|5.4e-21|104.4|mdm:103401427|protein brassinosteroid insensitive 1 [EC:2.7.10.1 2.7.11.1]!K20641|2|1.0e-11|73.6|cvr:CHLNCDRAFT_59250|Rho GTPase-activating protein 20	XP_021726481.1	5e-57	squamosa promoter-binding protein 1-like isoform X2 [Chenopodium quinoa]
miR156c	XM_021871804.1	0	NA	0	NA	XM_021871804.1	-	K13415|1|3.0e-18|96.7|mdm:103401427|protein brassinosteroid insensitive 1 [EC:2.7.10.1 2.7.11.1]!K20641|2|2.3e-13|80.5|cvr:CHLNCDRAFT_59250|Rho GTPase-activating protein 20	XP_021727496.1	2.5e-204	squamosa promoter-binding-like protein 16 [Chenopodium quinoa]
miR156c	XM_021875189.1	1	NA	0.5	NA	XM_021875189.1	-	K13415|1|1.6e-16|91.3|mdm:103401427|protein brassinosteroid insensitive 1 [EC:2.7.10.1 2.7.11.1]!K20641|2|3.3e-14|83.6|cvr:CHLNCDRAFT_59250|Rho GTPase-activating protein 20	XP_021730881.1	0	squamosa promoter-binding-like protein 18 isoform X1 [Chenopodium quinoa]
miR156c	XM_021875197.1	1	NA	0.5	NA	XM_021875197.1	-	K13415|1|1.5e-16|91.3|mdm:103401427|protein brassinosteroid insensitive 1 [EC:2.7.10.1 2.7.11.1]!K20641|2|3.2e-14|83.6|cvr:CHLNCDRAFT_59250|Rho GTPase-activating protein 20	XP_021730889.1	0	squamosa promoter-binding-like protein 18 isoform X2 [Chenopodium quinoa]
miR156c	XM_021875206.1	1	NA	0.5	NA	XM_021875206.1	-	K13415|1|1.3e-16|91.3|mdm:103401427|protein brassinosteroid insensitive 1 [EC:2.7.10.1 2.7.11.1]!K20641|2|2.6e-14|83.6|cvr:CHLNCDRAFT_59250|Rho GTPase-activating protein 20	XP_021730881.1	4.8e-272	squamosa promoter-binding-like protein 18 isoform X1 [Chenopodium quinoa]
miR156c	XM_021881727.1	3.5	NA	2	NA	XM_021881727.1	-	K00423|1|4.1e-21|105.9|egr:104451286|L-ascorbate oxidase [EC:1.10.3.3]!K05350|2|8.9e-08|61.6|nnu:104604855|beta-glucosidase [EC:3.2.1.21]	XP_021737419.1	4.3e-218	putative F-box/LRR-repeat protein At4g15060 [Chenopodium quinoa]
miR156c	XM_021881728.1	3.5	NA	2	NA	XM_021881728.1	-	K00423|1|4.1e-21|105.9|egr:104451286|L-ascorbate oxidase [EC:1.10.3.3]!K05350|2|8.9e-08|61.6|nnu:104604855|beta-glucosidase [EC:3.2.1.21]	XP_021737419.1	4.3e-218	putative F-box/LRR-repeat protein At4g15060 [Chenopodium quinoa]
miR156c	XM_021881886.1	3.5	NA	2	NA	XM_021881886.1	-	-	XP_021737578.1	3.8e-100	uncharacterized protein LOC110704108 [Chenopodium quinoa]
miR156c	XM_021884935.1	3	NA	1.5	NA	XM_021884935.1	-	K13415|1|3.6e-16|88.6|mdm:103401427|protein brassinosteroid insensitive 1 [EC:2.7.10.1 2.7.11.1]!K20641|2|4.0e-07|58.5|cvr:CHLNCDRAFT_59250|Rho GTPase-activating protein 20	XP_021740627.1	2.4e-71	squamosa promoter-binding protein 1-like [Chenopodium quinoa]
miR156c	XM_021889412.1	0	NA	0	NA	XM_021889412.1	-	K13415|1|1.0e-18|98.2|mdm:103401427|protein brassinosteroid insensitive 1 [EC:2.7.10.1 2.7.11.1]!K20641|2|9.0e-15|85.1|cvr:CHLNCDRAFT_59250|Rho GTPase-activating protein 20	XP_021745104.1	6.4e-269	squamosa promoter-binding-like protein 2 [Chenopodium quinoa]
miR156c	XM_021889421.1	0	NA	0	NA	XM_021889421.1	-	K13415|1|1.3e-18|98.2|mdm:103401427|protein brassinosteroid insensitive 1 [EC:2.7.10.1 2.7.11.1]!K20641|2|1.2e-14|85.1|cvr:CHLNCDRAFT_59250|Rho GTPase-activating protein 20	XP_021745104.1	8.4e-269	squamosa promoter-binding-like protein 2 [Chenopodium quinoa]
miR156c	XM_021889619.1	1	NA	0.5	NA	XM_021889619.1	GO:0005634,GO:0003677,GO:0046872,	K13415|1|4.8e-16|89.4|mdm:103401427|protein brassinosteroid insensitive 1 [EC:2.7.10.1 2.7.11.1]!K20641|2|5.1e-10|69.3|cvr:CHLNCDRAFT_59250|Rho GTPase-activating protein 20	XP_021745311.1	9e-255	squamosa promoter-binding-like protein 13A [Chenopodium quinoa]
miR156c	XM_021900841.1	0.5	NA	0.2	NA	XM_021900841.1	-	K13415|1|5.2e-16|89.0|mdm:103401427|protein brassinosteroid insensitive 1 [EC:2.7.10.1 2.7.11.1]!K20641|2|1.2e-12|77.8|cvr:CHLNCDRAFT_59250|Rho GTPase-activating protein 20	XP_021756533.1	2.9e-246	squamosa promoter-binding-like protein 6 [Chenopodium quinoa]
miR156c	XM_021901492.1	1	NA	0.5	NA	XM_021901492.1	-	K13415|1|1.3e-16|91.3|mdm:103401427|protein brassinosteroid insensitive 1 [EC:2.7.10.1 2.7.11.1]!K20641|2|1.3e-13|81.3|cvr:CHLNCDRAFT_59250|Rho GTPase-activating protein 20	XP_021757184.1	0	squamosa promoter-binding-like protein 18 isoform X1 [Chenopodium quinoa]
miR156c	XM_021901493.1	1	NA	0.5	NA	XM_021901493.1	-	K13415|1|1.4e-16|91.3|mdm:103401427|protein brassinosteroid insensitive 1 [EC:2.7.10.1 2.7.11.1]!K20641|2|1.4e-13|81.3|cvr:CHLNCDRAFT_59250|Rho GTPase-activating protein 20	XP_021757184.1	0	squamosa promoter-binding-like protein 18 isoform X1 [Chenopodium quinoa]
miR156c	XM_021901494.1	1	NA	0.5	NA	XM_021901494.1	-	K13415|1|1.2e-16|91.3|mdm:103401427|protein brassinosteroid insensitive 1 [EC:2.7.10.1 2.7.11.1]!K20641|2|1.2e-13|81.3|cvr:CHLNCDRAFT_59250|Rho GTPase-activating protein 20	XP_021757186.1	3.4e-304	teosinte glume architecture 1-like isoform X3 [Chenopodium quinoa]
miR156c	XM_021908976.1	2	NA	1	NA	XM_021908976.1	-	K03231|1|1.7e-39|166.8|mtr:MTR_8g008740|elongation factor 1-alpha!K09527|2|6.0e-16|88.6|lsv:111888013|DnaJ homolog subfamily C member 7!K10352|4|3.4e-11|72.8|mus:103974110|myosin heavy chain	XP_021764668.1	4.5e-219	interactor of constitutive active ROPs 4-like [Chenopodium quinoa]
miR156c	XM_021908977.1	2	NA	1	NA	XM_021908977.1	-	K03231|1|1.7e-39|166.8|mtr:MTR_8g008740|elongation factor 1-alpha!K09527|2|6.0e-16|88.6|lsv:111888013|DnaJ homolog subfamily C member 7!K10352|4|3.4e-11|72.8|mus:103974110|myosin heavy chain	XP_021764668.1	4.5e-219	interactor of constitutive active ROPs 4-like [Chenopodium quinoa]
miR156c	XM_021914710.1	0	NA	0	NA	XM_021914710.1	-	K13415|1|4.6e-18|95.9|mdm:103401427|protein brassinosteroid insensitive 1 [EC:2.7.10.1 2.7.11.1]!K20641|2|2.4e-14|83.6|cvr:CHLNCDRAFT_59250|Rho GTPase-activating protein 20	XP_021770402.1	8.2e-223	squamosa promoter-binding-like protein 17 [Chenopodium quinoa]
miR156c	XM_021917851.1	3	NA	2	NA	XM_021917851.1	-	K13415|1|9.8e-22|107.5|mdm:103401427|protein brassinosteroid insensitive 1 [EC:2.7.10.1 2.7.11.1]!K20641|2|2.6e-14|82.8|cvr:CHLNCDRAFT_59250|Rho GTPase-activating protein 20	XP_021773543.1	3.2e-127	squamosa promoter-binding-like protein 3 [Chenopodium quinoa]
miR156c	XR_002505691.1	2.5	NA	1.2	NA	XR_002505691.1	-	-	XP_021728480.1	2e-71	uncharacterized protein LOC110695573 [Chenopodium quinoa]
miR156c	XR_002505692.1	2.5	NA	1.2	NA	XR_002505692.1	-	-	XP_021728480.1	2e-71	uncharacterized protein LOC110695573 [Chenopodium quinoa]
miR156c	XR_002507799.1	3.5	NA	2	NA	XR_002507799.1	-	K00423|1|5.4e-21|105.9|egr:104451286|L-ascorbate oxidase [EC:1.10.3.3]!K05350|2|1.2e-07|61.6|nnu:104604855|beta-glucosidase [EC:3.2.1.21]!K10393|3|1.7e-06|57.8|nta:107828690|kinesin family member 2/24	XP_021737419.1	5.7e-210	putative F-box/LRR-repeat protein At4g15060 [Chenopodium quinoa]
miR156c	XR_002507800.1	3.5	NA	2	NA	XR_002507800.1	-	K00423|1|4.1e-21|105.9|egr:104451286|L-ascorbate oxidase [EC:1.10.3.3]!K05350|2|8.9e-08|61.6|nnu:104604855|beta-glucosidase [EC:3.2.1.21]	XP_021737419.1	2.1e-180	putative F-box/LRR-repeat protein At4g15060 [Chenopodium quinoa]
miR156c	XR_002508412.1	3	NA	1.5	NA	XR_002508412.1	-	K13415|1|1.5e-08|62.8|mdm:103401427|protein brassinosteroid insensitive 1 [EC:2.7.10.1 2.7.11.1]	XP_021740627.1	3.8e-34	squamosa promoter-binding protein 1-like [Chenopodium quinoa]
miR156c	XR_002511558.1	1	NA	0.5	NA	XR_002511558.1	-	K13415|1|1.2e-16|91.3|mdm:103401427|protein brassinosteroid insensitive 1 [EC:2.7.10.1 2.7.11.1]!K20641|2|1.3e-13|81.3|cvr:CHLNCDRAFT_59250|Rho GTPase-activating protein 20	XP_021757184.1	1.1e-302	squamosa promoter-binding-like protein 18 isoform X1 [Chenopodium quinoa]
miR156c_1	XM_021857955.1	0.5	NA	0.5	NA	XM_021857955.1	-	K13415|1|2.1e-18|97.1|mdm:103401427|protein brassinosteroid insensitive 1 [EC:2.7.10.1 2.7.11.1]!K20641|2|4.6e-13|79.3|cvr:CHLNCDRAFT_59250|Rho GTPase-activating protein 20	XP_021713647.1	2.1e-205	squamosa promoter-binding-like protein 16 isoform X1 [Chenopodium quinoa]
miR156c_1	XM_021857956.1	0.5	NA	0.5	NA	XM_021857956.1	-	K13415|1|2.1e-18|97.1|mdm:103401427|protein brassinosteroid insensitive 1 [EC:2.7.10.1 2.7.11.1]!K20641|2|4.6e-13|79.3|cvr:CHLNCDRAFT_59250|Rho GTPase-activating protein 20	XP_021713648.1	6.1e-205	squamosa promoter-binding-like protein 16 isoform X2 [Chenopodium quinoa]
miR156c_1	XM_021862675.1	0.5	NA	0.5	NA	XM_021862675.1	-	K13415|1|2.2e-17|93.6|mdm:103401427|protein brassinosteroid insensitive 1 [EC:2.7.10.1 2.7.11.1]!K20641|2|1.6e-12|77.4|cvr:CHLNCDRAFT_59250|Rho GTPase-activating protein 20	XP_021718367.1	3e-246	squamosa promoter-binding-like protein 6 isoform X1 [Chenopodium quinoa]
miR156c_1	XM_021862676.1	0.5	NA	0.5	NA	XM_021862676.1	-	K13415|1|2.3e-17|93.6|mdm:103401427|protein brassinosteroid insensitive 1 [EC:2.7.10.1 2.7.11.1]!K20641|2|1.7e-12|77.4|cvr:CHLNCDRAFT_59250|Rho GTPase-activating protein 20	XP_021718368.1	3.1e-238	squamosa promoter-binding-like protein 6 isoform X2 [Chenopodium quinoa]
miR156c_1	XM_021863611.1	0	NA	0	NA	XM_021863611.1	-	K13415|1|2.1e-21|106.3|mdm:103401427|protein brassinosteroid insensitive 1 [EC:2.7.10.1 2.7.11.1]	XP_021719303.1	3.6e-128	squamosa promoter-binding-like protein 3 [Chenopodium quinoa]
miR156c_1	XM_021867382.1	0.5	NA	0.5	NA	XM_021867382.1	GO:0005634,GO:0003677,GO:0046872,	K13415|1|8.7e-17|91.3|mdm:103401427|protein brassinosteroid insensitive 1 [EC:2.7.10.1 2.7.11.1]!K20641|2|2.1e-10|70.1|cvr:CHLNCDRAFT_59250|Rho GTPase-activating protein 20	XP_021723074.1	6.7e-233	squamosa promoter-binding-like protein 13A [Chenopodium quinoa]
miR156c_1	XM_021867383.1	0.5	NA	0.5	NA	XM_021867383.1	GO:0005634,GO:0003677,GO:0046872,	K13415|1|9.5e-17|91.3|mdm:103401427|protein brassinosteroid insensitive 1 [EC:2.7.10.1 2.7.11.1]!K20641|2|2.3e-10|70.1|cvr:CHLNCDRAFT_59250|Rho GTPase-activating protein 20	XP_021723074.1	7.3e-233	squamosa promoter-binding-like protein 13A [Chenopodium quinoa]
miR156c_1	XM_021867384.1	0.5	NA	0.5	NA	XM_021867384.1	GO:0005634,GO:0003677,GO:0046872,	K13415|1|8.1e-17|91.3|mdm:103401427|protein brassinosteroid insensitive 1 [EC:2.7.10.1 2.7.11.1]!K20641|2|1.9e-10|70.1|cvr:CHLNCDRAFT_59250|Rho GTPase-activating protein 20	XP_021723074.1	6.3e-233	squamosa promoter-binding-like protein 13A [Chenopodium quinoa]
miR156c_1	XM_021867403.1	0.5	NA	0.5	NA	XM_021867403.1	-	K13415|1|1.3e-18|97.8|mdm:103401427|protein brassinosteroid insensitive 1 [EC:2.7.10.1 2.7.11.1]!K20641|2|1.9e-14|84.0|cvr:CHLNCDRAFT_59250|Rho GTPase-activating protein 20	XP_021723095.1	1.6e-269	squamosa promoter-binding-like protein 2 [Chenopodium quinoa]
miR156c_1	XM_021867404.1	0.5	NA	0.5	NA	XM_021867404.1	-	K13415|1|1.9e-18|97.8|mdm:103401427|protein brassinosteroid insensitive 1 [EC:2.7.10.1 2.7.11.1]!K20641|2|2.8e-14|84.0|cvr:CHLNCDRAFT_59250|Rho GTPase-activating protein 20	XP_021723095.1	2.3e-269	squamosa promoter-binding-like protein 2 [Chenopodium quinoa]
miR156c_1	XM_021868311.1	0.5	NA	0.5	NA	XM_021868311.1	-	K13415|1|3.5e-18|95.9|mdm:103401427|protein brassinosteroid insensitive 1 [EC:2.7.10.1 2.7.11.1]!K20641|2|1.8e-14|83.6|cvr:CHLNCDRAFT_59250|Rho GTPase-activating protein 20	XP_021724003.1	1.3e-223	squamosa promoter-binding-like protein 17 isoform X1 [Chenopodium quinoa]
miR156c_1	XM_021868312.1	0.5	NA	0.5	NA	XM_021868312.1	-	K13415|1|3.4e-18|95.9|mdm:103401427|protein brassinosteroid insensitive 1 [EC:2.7.10.1 2.7.11.1]!K20641|2|1.8e-14|83.6|cvr:CHLNCDRAFT_59250|Rho GTPase-activating protein 20	XP_021724004.1	3.6e-215	squamosa promoter-binding-like protein 17 isoform X2 [Chenopodium quinoa]
miR156c_1	XM_021868821.1	1.5	NA	1	NA	XM_021868821.1	GO:0005634,GO:0043565,GO:0003700,GO:0006351,	K18834|1|4.0e-292|1006.5|cqi:110691854|WRKY transcription factor 1	XP_021724513.1	2.2e-291	probable WRKY transcription factor 58 [Chenopodium quinoa]
miR156c_1	XM_021871804.1	0.5	NA	0.5	NA	XM_021871804.1	-	K13415|1|3.0e-18|96.7|mdm:103401427|protein brassinosteroid insensitive 1 [EC:2.7.10.1 2.7.11.1]!K20641|2|2.3e-13|80.5|cvr:CHLNCDRAFT_59250|Rho GTPase-activating protein 20	XP_021727496.1	2.5e-204	squamosa promoter-binding-like protein 16 [Chenopodium quinoa]
miR156c_1	XM_021875189.1	0.5	NA	0.5	NA	XM_021875189.1	-	K13415|1|1.6e-16|91.3|mdm:103401427|protein brassinosteroid insensitive 1 [EC:2.7.10.1 2.7.11.1]!K20641|2|3.3e-14|83.6|cvr:CHLNCDRAFT_59250|Rho GTPase-activating protein 20	XP_021730881.1	0	squamosa promoter-binding-like protein 18 isoform X1 [Chenopodium quinoa]
miR156c_1	XM_021875197.1	0.5	NA	0.5	NA	XM_021875197.1	-	K13415|1|1.5e-16|91.3|mdm:103401427|protein brassinosteroid insensitive 1 [EC:2.7.10.1 2.7.11.1]!K20641|2|3.2e-14|83.6|cvr:CHLNCDRAFT_59250|Rho GTPase-activating protein 20	XP_021730889.1	0	squamosa promoter-binding-like protein 18 isoform X2 [Chenopodium quinoa]
miR156c_1	XM_021875206.1	0.5	NA	0.5	NA	XM_021875206.1	-	K13415|1|1.3e-16|91.3|mdm:103401427|protein brassinosteroid insensitive 1 [EC:2.7.10.1 2.7.11.1]!K20641|2|2.6e-14|83.6|cvr:CHLNCDRAFT_59250|Rho GTPase-activating protein 20	XP_021730881.1	4.8e-272	squamosa promoter-binding-like protein 18 isoform X1 [Chenopodium quinoa]
miR156c_1	XM_021879503.1	1.5	NA	1	NA	XM_021879503.1	GO:0005634,GO:0043565,GO:0003700,GO:0006351,	K18834|1|7.5e-291|1002.3|cqi:110701898|WRKY transcription factor 1	XP_021735195.1	4e-290	probable WRKY transcription factor 58 [Chenopodium quinoa]
miR156c_1	XM_021881886.1	3.5	NA	2	NA	XM_021881886.1	-	-	XP_021737578.1	3.8e-100	uncharacterized protein LOC110704108 [Chenopodium quinoa]
miR156c_1	XM_021889412.1	0.5	NA	0.5	NA	XM_021889412.1	-	K13415|1|1.0e-18|98.2|mdm:103401427|protein brassinosteroid insensitive 1 [EC:2.7.10.1 2.7.11.1]!K20641|2|9.0e-15|85.1|cvr:CHLNCDRAFT_59250|Rho GTPase-activating protein 20	XP_021745104.1	6.4e-269	squamosa promoter-binding-like protein 2 [Chenopodium quinoa]
miR156c_1	XM_021889421.1	0.5	NA	0.5	NA	XM_021889421.1	-	K13415|1|1.3e-18|98.2|mdm:103401427|protein brassinosteroid insensitive 1 [EC:2.7.10.1 2.7.11.1]!K20641|2|1.2e-14|85.1|cvr:CHLNCDRAFT_59250|Rho GTPase-activating protein 20	XP_021745104.1	8.4e-269	squamosa promoter-binding-like protein 2 [Chenopodium quinoa]
miR156c_1	XM_021889619.1	0.5	NA	0.5	NA	XM_021889619.1	GO:0005634,GO:0003677,GO:0046872,	K13415|1|4.8e-16|89.4|mdm:103401427|protein brassinosteroid insensitive 1 [EC:2.7.10.1 2.7.11.1]!K20641|2|5.1e-10|69.3|cvr:CHLNCDRAFT_59250|Rho GTPase-activating protein 20	XP_021745311.1	9e-255	squamosa promoter-binding-like protein 13A [Chenopodium quinoa]
miR156c_1	XM_021900841.1	0.5	NA	0.5	NA	XM_021900841.1	-	K13415|1|5.2e-16|89.0|mdm:103401427|protein brassinosteroid insensitive 1 [EC:2.7.10.1 2.7.11.1]!K20641|2|1.2e-12|77.8|cvr:CHLNCDRAFT_59250|Rho GTPase-activating protein 20	XP_021756533.1	2.9e-246	squamosa promoter-binding-like protein 6 [Chenopodium quinoa]
miR156c_1	XM_021901492.1	0.5	NA	0.5	NA	XM_021901492.1	-	K13415|1|1.3e-16|91.3|mdm:103401427|protein brassinosteroid insensitive 1 [EC:2.7.10.1 2.7.11.1]!K20641|2|1.3e-13|81.3|cvr:CHLNCDRAFT_59250|Rho GTPase-activating protein 20	XP_021757184.1	0	squamosa promoter-binding-like protein 18 isoform X1 [Chenopodium quinoa]
miR156c_1	XM_021901493.1	0.5	NA	0.5	NA	XM_021901493.1	-	K13415|1|1.4e-16|91.3|mdm:103401427|protein brassinosteroid insensitive 1 [EC:2.7.10.1 2.7.11.1]!K20641|2|1.4e-13|81.3|cvr:CHLNCDRAFT_59250|Rho GTPase-activating protein 20	XP_021757184.1	0	squamosa promoter-binding-like protein 18 isoform X1 [Chenopodium quinoa]
miR156c_1	XM_021901494.1	0.5	NA	0.5	NA	XM_021901494.1	-	K13415|1|1.2e-16|91.3|mdm:103401427|protein brassinosteroid insensitive 1 [EC:2.7.10.1 2.7.11.1]!K20641|2|1.2e-13|81.3|cvr:CHLNCDRAFT_59250|Rho GTPase-activating protein 20	XP_021757186.1	3.4e-304	teosinte glume architecture 1-like isoform X3 [Chenopodium quinoa]
miR156c_1	XM_021914710.1	0.5	NA	0.5	NA	XM_021914710.1	-	K13415|1|4.6e-18|95.9|mdm:103401427|protein brassinosteroid insensitive 1 [EC:2.7.10.1 2.7.11.1]!K20641|2|2.4e-14|83.6|cvr:CHLNCDRAFT_59250|Rho GTPase-activating protein 20	XP_021770402.1	8.2e-223	squamosa promoter-binding-like protein 17 [Chenopodium quinoa]
miR156c_1	XM_021917851.1	0	NA	0	NA	XM_021917851.1	-	K13415|1|9.8e-22|107.5|mdm:103401427|protein brassinosteroid insensitive 1 [EC:2.7.10.1 2.7.11.1]!K20641|2|2.6e-14|82.8|cvr:CHLNCDRAFT_59250|Rho GTPase-activating protein 20	XP_021773543.1	3.2e-127	squamosa promoter-binding-like protein 3 [Chenopodium quinoa]
miR156c_1	XR_002511558.1	0.5	NA	0.5	NA	XR_002511558.1	-	K13415|1|1.2e-16|91.3|mdm:103401427|protein brassinosteroid insensitive 1 [EC:2.7.10.1 2.7.11.1]!K20641|2|1.3e-13|81.3|cvr:CHLNCDRAFT_59250|Rho GTPase-activating protein 20	XP_021757184.1	1.1e-302	squamosa promoter-binding-like protein 18 isoform X1 [Chenopodium quinoa]
miR156c_1	XR_002512246.1	2.5	NA	1.5	NA	XR_002512246.1	-	-	-	-	-
miR156c_1	XR_002513149.1	2.5	NA	1.5	NA	XR_002513149.1	-	-	-	-	-
miR156e_1	XM_021857955.1	3	NA	1.5	NA	XM_021857955.1	-	K13415|1|2.1e-18|97.1|mdm:103401427|protein brassinosteroid insensitive 1 [EC:2.7.10.1 2.7.11.1]!K20641|2|4.6e-13|79.3|cvr:CHLNCDRAFT_59250|Rho GTPase-activating protein 20	XP_021713647.1	2.1e-205	squamosa promoter-binding-like protein 16 isoform X1 [Chenopodium quinoa]
miR156e_1	XM_021857956.1	3	NA	1.5	NA	XM_021857956.1	-	K13415|1|2.1e-18|97.1|mdm:103401427|protein brassinosteroid insensitive 1 [EC:2.7.10.1 2.7.11.1]!K20641|2|4.6e-13|79.3|cvr:CHLNCDRAFT_59250|Rho GTPase-activating protein 20	XP_021713648.1	6.1e-205	squamosa promoter-binding-like protein 16 isoform X2 [Chenopodium quinoa]
miR156e_1	XM_021862675.1	2	NA	1	NA	XM_021862675.1	-	K13415|1|2.2e-17|93.6|mdm:103401427|protein brassinosteroid insensitive 1 [EC:2.7.10.1 2.7.11.1]!K20641|2|1.6e-12|77.4|cvr:CHLNCDRAFT_59250|Rho GTPase-activating protein 20	XP_021718367.1	3e-246	squamosa promoter-binding-like protein 6 isoform X1 [Chenopodium quinoa]
miR156e_1	XM_021862676.1	2	NA	1	NA	XM_021862676.1	-	K13415|1|2.3e-17|93.6|mdm:103401427|protein brassinosteroid insensitive 1 [EC:2.7.10.1 2.7.11.1]!K20641|2|1.7e-12|77.4|cvr:CHLNCDRAFT_59250|Rho GTPase-activating protein 20	XP_021718368.1	3.1e-238	squamosa promoter-binding-like protein 6 isoform X2 [Chenopodium quinoa]
miR156e_1	XM_021867382.1	3	NA	1.5	NA	XM_021867382.1	GO:0005634,GO:0003677,GO:0046872,	K13415|1|8.7e-17|91.3|mdm:103401427|protein brassinosteroid insensitive 1 [EC:2.7.10.1 2.7.11.1]!K20641|2|2.1e-10|70.1|cvr:CHLNCDRAFT_59250|Rho GTPase-activating protein 20	XP_021723074.1	6.7e-233	squamosa promoter-binding-like protein 13A [Chenopodium quinoa]
miR156e_1	XM_021867383.1	3	NA	1.5	NA	XM_021867383.1	GO:0005634,GO:0003677,GO:0046872,	K13415|1|9.5e-17|91.3|mdm:103401427|protein brassinosteroid insensitive 1 [EC:2.7.10.1 2.7.11.1]!K20641|2|2.3e-10|70.1|cvr:CHLNCDRAFT_59250|Rho GTPase-activating protein 20	XP_021723074.1	7.3e-233	squamosa promoter-binding-like protein 13A [Chenopodium quinoa]
miR156e_1	XM_021867384.1	3	NA	1.5	NA	XM_021867384.1	GO:0005634,GO:0003677,GO:0046872,	K13415|1|8.1e-17|91.3|mdm:103401427|protein brassinosteroid insensitive 1 [EC:2.7.10.1 2.7.11.1]!K20641|2|1.9e-10|70.1|cvr:CHLNCDRAFT_59250|Rho GTPase-activating protein 20	XP_021723074.1	6.3e-233	squamosa promoter-binding-like protein 13A [Chenopodium quinoa]
miR156e_1	XM_021867403.1	3	NA	1.5	NA	XM_021867403.1	-	K13415|1|1.3e-18|97.8|mdm:103401427|protein brassinosteroid insensitive 1 [EC:2.7.10.1 2.7.11.1]!K20641|2|1.9e-14|84.0|cvr:CHLNCDRAFT_59250|Rho GTPase-activating protein 20	XP_021723095.1	1.6e-269	squamosa promoter-binding-like protein 2 [Chenopodium quinoa]
miR156e_1	XM_021867404.1	3	NA	1.5	NA	XM_021867404.1	-	K13415|1|1.9e-18|97.8|mdm:103401427|protein brassinosteroid insensitive 1 [EC:2.7.10.1 2.7.11.1]!K20641|2|2.8e-14|84.0|cvr:CHLNCDRAFT_59250|Rho GTPase-activating protein 20	XP_021723095.1	2.3e-269	squamosa promoter-binding-like protein 2 [Chenopodium quinoa]
miR156e_1	XM_021868311.1	3	NA	1.5	NA	XM_021868311.1	-	K13415|1|3.5e-18|95.9|mdm:103401427|protein brassinosteroid insensitive 1 [EC:2.7.10.1 2.7.11.1]!K20641|2|1.8e-14|83.6|cvr:CHLNCDRAFT_59250|Rho GTPase-activating protein 20	XP_021724003.1	1.3e-223	squamosa promoter-binding-like protein 17 isoform X1 [Chenopodium quinoa]
miR156e_1	XM_021868312.1	3	NA	1.5	NA	XM_021868312.1	-	K13415|1|3.4e-18|95.9|mdm:103401427|protein brassinosteroid insensitive 1 [EC:2.7.10.1 2.7.11.1]!K20641|2|1.8e-14|83.6|cvr:CHLNCDRAFT_59250|Rho GTPase-activating protein 20	XP_021724004.1	3.6e-215	squamosa promoter-binding-like protein 17 isoform X2 [Chenopodium quinoa]
miR156e_1	XM_021870788.1	2	NA	1	NA	XM_021870788.1	-	K13415|1|5.3e-17|91.3|mdm:103401427|protein brassinosteroid insensitive 1 [EC:2.7.10.1 2.7.11.1]!K20641|2|1.0e-07|60.5|cvr:CHLNCDRAFT_59250|Rho GTPase-activating protein 20	XP_021726480.1	7.3e-73	squamosa promoter-binding protein 1-like isoform X1 [Chenopodium quinoa]
miR156e_1	XM_021870789.1	2	NA	1	NA	XM_021870789.1	-	K13415|1|5.4e-21|104.4|mdm:103401427|protein brassinosteroid insensitive 1 [EC:2.7.10.1 2.7.11.1]!K20641|2|1.0e-11|73.6|cvr:CHLNCDRAFT_59250|Rho GTPase-activating protein 20	XP_021726481.1	5e-57	squamosa promoter-binding protein 1-like isoform X2 [Chenopodium quinoa]
miR156e_1	XM_021871804.1	3	NA	1.5	NA	XM_021871804.1	-	K13415|1|3.0e-18|96.7|mdm:103401427|protein brassinosteroid insensitive 1 [EC:2.7.10.1 2.7.11.1]!K20641|2|2.3e-13|80.5|cvr:CHLNCDRAFT_59250|Rho GTPase-activating protein 20	XP_021727496.1	2.5e-204	squamosa promoter-binding-like protein 16 [Chenopodium quinoa]
miR156e_1	XM_021875189.1	3	NA	1.5	NA	XM_021875189.1	-	K13415|1|1.6e-16|91.3|mdm:103401427|protein brassinosteroid insensitive 1 [EC:2.7.10.1 2.7.11.1]!K20641|2|3.3e-14|83.6|cvr:CHLNCDRAFT_59250|Rho GTPase-activating protein 20	XP_021730881.1	0	squamosa promoter-binding-like protein 18 isoform X1 [Chenopodium quinoa]
miR156e_1	XM_021875197.1	3	NA	1.5	NA	XM_021875197.1	-	K13415|1|1.5e-16|91.3|mdm:103401427|protein brassinosteroid insensitive 1 [EC:2.7.10.1 2.7.11.1]!K20641|2|3.2e-14|83.6|cvr:CHLNCDRAFT_59250|Rho GTPase-activating protein 20	XP_021730889.1	0	squamosa promoter-binding-like protein 18 isoform X2 [Chenopodium quinoa]
miR156e_1	XM_021875206.1	3	NA	1.5	NA	XM_021875206.1	-	K13415|1|1.3e-16|91.3|mdm:103401427|protein brassinosteroid insensitive 1 [EC:2.7.10.1 2.7.11.1]!K20641|2|2.6e-14|83.6|cvr:CHLNCDRAFT_59250|Rho GTPase-activating protein 20	XP_021730881.1	4.8e-272	squamosa promoter-binding-like protein 18 isoform X1 [Chenopodium quinoa]
miR156e_1	XM_021881727.1	2	NA	1.2	NA	XM_021881727.1	-	K00423|1|4.1e-21|105.9|egr:104451286|L-ascorbate oxidase [EC:1.10.3.3]!K05350|2|8.9e-08|61.6|nnu:104604855|beta-glucosidase [EC:3.2.1.21]	XP_021737419.1	4.3e-218	putative F-box/LRR-repeat protein At4g15060 [Chenopodium quinoa]
miR156e_1	XM_021881728.1	2	NA	1.2	NA	XM_021881728.1	-	K00423|1|4.1e-21|105.9|egr:104451286|L-ascorbate oxidase [EC:1.10.3.3]!K05350|2|8.9e-08|61.6|nnu:104604855|beta-glucosidase [EC:3.2.1.21]	XP_021737419.1	4.3e-218	putative F-box/LRR-repeat protein At4g15060 [Chenopodium quinoa]
miR156e_1	XM_021884935.1	2	NA	1	NA	XM_021884935.1	-	K13415|1|3.6e-16|88.6|mdm:103401427|protein brassinosteroid insensitive 1 [EC:2.7.10.1 2.7.11.1]!K20641|2|4.0e-07|58.5|cvr:CHLNCDRAFT_59250|Rho GTPase-activating protein 20	XP_021740627.1	2.4e-71	squamosa promoter-binding protein 1-like [Chenopodium quinoa]
miR156e_1	XM_021889412.1	3	NA	1.5	NA	XM_021889412.1	-	K13415|1|1.0e-18|98.2|mdm:103401427|protein brassinosteroid insensitive 1 [EC:2.7.10.1 2.7.11.1]!K20641|2|9.0e-15|85.1|cvr:CHLNCDRAFT_59250|Rho GTPase-activating protein 20	XP_021745104.1	6.4e-269	squamosa promoter-binding-like protein 2 [Chenopodium quinoa]
miR156e_1	XM_021889421.1	3	NA	1.5	NA	XM_021889421.1	-	K13415|1|1.3e-18|98.2|mdm:103401427|protein brassinosteroid insensitive 1 [EC:2.7.10.1 2.7.11.1]!K20641|2|1.2e-14|85.1|cvr:CHLNCDRAFT_59250|Rho GTPase-activating protein 20	XP_021745104.1	8.4e-269	squamosa promoter-binding-like protein 2 [Chenopodium quinoa]
miR156e_1	XM_021889619.1	3	NA	1.5	NA	XM_021889619.1	GO:0005634,GO:0003677,GO:0046872,	K13415|1|4.8e-16|89.4|mdm:103401427|protein brassinosteroid insensitive 1 [EC:2.7.10.1 2.7.11.1]!K20641|2|5.1e-10|69.3|cvr:CHLNCDRAFT_59250|Rho GTPase-activating protein 20	XP_021745311.1	9e-255	squamosa promoter-binding-like protein 13A [Chenopodium quinoa]
miR156e_1	XM_021900841.1	2	NA	1	NA	XM_021900841.1	-	K13415|1|5.2e-16|89.0|mdm:103401427|protein brassinosteroid insensitive 1 [EC:2.7.10.1 2.7.11.1]!K20641|2|1.2e-12|77.8|cvr:CHLNCDRAFT_59250|Rho GTPase-activating protein 20	XP_021756533.1	2.9e-246	squamosa promoter-binding-like protein 6 [Chenopodium quinoa]
miR156e_1	XM_021901492.1	3	NA	1.5	NA	XM_021901492.1	-	K13415|1|1.3e-16|91.3|mdm:103401427|protein brassinosteroid insensitive 1 [EC:2.7.10.1 2.7.11.1]!K20641|2|1.3e-13|81.3|cvr:CHLNCDRAFT_59250|Rho GTPase-activating protein 20	XP_021757184.1	0	squamosa promoter-binding-like protein 18 isoform X1 [Chenopodium quinoa]
miR156e_1	XM_021901493.1	3	NA	1.5	NA	XM_021901493.1	-	K13415|1|1.4e-16|91.3|mdm:103401427|protein brassinosteroid insensitive 1 [EC:2.7.10.1 2.7.11.1]!K20641|2|1.4e-13|81.3|cvr:CHLNCDRAFT_59250|Rho GTPase-activating protein 20	XP_021757184.1	0	squamosa promoter-binding-like protein 18 isoform X1 [Chenopodium quinoa]
miR156e_1	XM_021901494.1	3	NA	1.5	NA	XM_021901494.1	-	K13415|1|1.2e-16|91.3|mdm:103401427|protein brassinosteroid insensitive 1 [EC:2.7.10.1 2.7.11.1]!K20641|2|1.2e-13|81.3|cvr:CHLNCDRAFT_59250|Rho GTPase-activating protein 20	XP_021757186.1	3.4e-304	teosinte glume architecture 1-like isoform X3 [Chenopodium quinoa]
miR156e_1	XM_021914710.1	3	NA	1.5	NA	XM_021914710.1	-	K13415|1|4.6e-18|95.9|mdm:103401427|protein brassinosteroid insensitive 1 [EC:2.7.10.1 2.7.11.1]!K20641|2|2.4e-14|83.6|cvr:CHLNCDRAFT_59250|Rho GTPase-activating protein 20	XP_021770402.1	8.2e-223	squamosa promoter-binding-like protein 17 [Chenopodium quinoa]
miR156e_1	XR_002507799.1	2	NA	1.2	NA	XR_002507799.1	-	K00423|1|5.4e-21|105.9|egr:104451286|L-ascorbate oxidase [EC:1.10.3.3]!K05350|2|1.2e-07|61.6|nnu:104604855|beta-glucosidase [EC:3.2.1.21]!K10393|3|1.7e-06|57.8|nta:107828690|kinesin family member 2/24	XP_021737419.1	5.7e-210	putative F-box/LRR-repeat protein At4g15060 [Chenopodium quinoa]
miR156e_1	XR_002507800.1	2	NA	1.2	NA	XR_002507800.1	-	K00423|1|4.1e-21|105.9|egr:104451286|L-ascorbate oxidase [EC:1.10.3.3]!K05350|2|8.9e-08|61.6|nnu:104604855|beta-glucosidase [EC:3.2.1.21]	XP_021737419.1	2.1e-180	putative F-box/LRR-repeat protein At4g15060 [Chenopodium quinoa]
miR156e_1	XR_002507830.1	3	NA	1.5	NA	XR_002507830.1	-	-	-	-	-
miR156e_1	XR_002508412.1	2	NA	1	NA	XR_002508412.1	-	K13415|1|1.5e-08|62.8|mdm:103401427|protein brassinosteroid insensitive 1 [EC:2.7.10.1 2.7.11.1]	XP_021740627.1	3.8e-34	squamosa promoter-binding protein 1-like [Chenopodium quinoa]
miR156e_1	XR_002511558.1	3	NA	1.5	NA	XR_002511558.1	-	K13415|1|1.2e-16|91.3|mdm:103401427|protein brassinosteroid insensitive 1 [EC:2.7.10.1 2.7.11.1]!K20641|2|1.3e-13|81.3|cvr:CHLNCDRAFT_59250|Rho GTPase-activating protein 20	XP_021757184.1	1.1e-302	squamosa promoter-binding-like protein 18 isoform X1 [Chenopodium quinoa]
miR156f	XM_021857955.1	0	NA	0	NA	XM_021857955.1	-	K13415|1|2.1e-18|97.1|mdm:103401427|protein brassinosteroid insensitive 1 [EC:2.7.10.1 2.7.11.1]!K20641|2|4.6e-13|79.3|cvr:CHLNCDRAFT_59250|Rho GTPase-activating protein 20	XP_021713647.1	2.1e-205	squamosa promoter-binding-like protein 16 isoform X1 [Chenopodium quinoa]
miR156f	XM_021857956.1	0	NA	0	NA	XM_021857956.1	-	K13415|1|2.1e-18|97.1|mdm:103401427|protein brassinosteroid insensitive 1 [EC:2.7.10.1 2.7.11.1]!K20641|2|4.6e-13|79.3|cvr:CHLNCDRAFT_59250|Rho GTPase-activating protein 20	XP_021713648.1	6.1e-205	squamosa promoter-binding-like protein 16 isoform X2 [Chenopodium quinoa]
miR156f	XM_021862675.1	1.5	NA	0.8	NA	XM_021862675.1	-	K13415|1|2.2e-17|93.6|mdm:103401427|protein brassinosteroid insensitive 1 [EC:2.7.10.1 2.7.11.1]!K20641|2|1.6e-12|77.4|cvr:CHLNCDRAFT_59250|Rho GTPase-activating protein 20	XP_021718367.1	3e-246	squamosa promoter-binding-like protein 6 isoform X1 [Chenopodium quinoa]
miR156f	XM_021862676.1	1.5	NA	0.8	NA	XM_021862676.1	-	K13415|1|2.3e-17|93.6|mdm:103401427|protein brassinosteroid insensitive 1 [EC:2.7.10.1 2.7.11.1]!K20641|2|1.7e-12|77.4|cvr:CHLNCDRAFT_59250|Rho GTPase-activating protein 20	XP_021718368.1	3.1e-238	squamosa promoter-binding-like protein 6 isoform X2 [Chenopodium quinoa]
miR156f	XM_021867382.1	2	NA	1	NA	XM_021867382.1	GO:0005634,GO:0003677,GO:0046872,	K13415|1|8.7e-17|91.3|mdm:103401427|protein brassinosteroid insensitive 1 [EC:2.7.10.1 2.7.11.1]!K20641|2|2.1e-10|70.1|cvr:CHLNCDRAFT_59250|Rho GTPase-activating protein 20	XP_021723074.1	6.7e-233	squamosa promoter-binding-like protein 13A [Chenopodium quinoa]
miR156f	XM_021867383.1	2	NA	1	NA	XM_021867383.1	GO:0005634,GO:0003677,GO:0046872,	K13415|1|9.5e-17|91.3|mdm:103401427|protein brassinosteroid insensitive 1 [EC:2.7.10.1 2.7.11.1]!K20641|2|2.3e-10|70.1|cvr:CHLNCDRAFT_59250|Rho GTPase-activating protein 20	XP_021723074.1	7.3e-233	squamosa promoter-binding-like protein 13A [Chenopodium quinoa]
miR156f	XM_021867384.1	2	NA	1	NA	XM_021867384.1	GO:0005634,GO:0003677,GO:0046872,	K13415|1|8.1e-17|91.3|mdm:103401427|protein brassinosteroid insensitive 1 [EC:2.7.10.1 2.7.11.1]!K20641|2|1.9e-10|70.1|cvr:CHLNCDRAFT_59250|Rho GTPase-activating protein 20	XP_021723074.1	6.3e-233	squamosa promoter-binding-like protein 13A [Chenopodium quinoa]
miR156f	XM_021867403.1	1	NA	0.5	NA	XM_021867403.1	-	K13415|1|1.3e-18|97.8|mdm:103401427|protein brassinosteroid insensitive 1 [EC:2.7.10.1 2.7.11.1]!K20641|2|1.9e-14|84.0|cvr:CHLNCDRAFT_59250|Rho GTPase-activating protein 20	XP_021723095.1	1.6e-269	squamosa promoter-binding-like protein 2 [Chenopodium quinoa]
miR156f	XM_021867404.1	1	NA	0.5	NA	XM_021867404.1	-	K13415|1|1.9e-18|97.8|mdm:103401427|protein brassinosteroid insensitive 1 [EC:2.7.10.1 2.7.11.1]!K20641|2|2.8e-14|84.0|cvr:CHLNCDRAFT_59250|Rho GTPase-activating protein 20	XP_021723095.1	2.3e-269	squamosa promoter-binding-like protein 2 [Chenopodium quinoa]
miR156f	XM_021868311.1	0	NA	0	NA	XM_021868311.1	-	K13415|1|3.5e-18|95.9|mdm:103401427|protein brassinosteroid insensitive 1 [EC:2.7.10.1 2.7.11.1]!K20641|2|1.8e-14|83.6|cvr:CHLNCDRAFT_59250|Rho GTPase-activating protein 20	XP_021724003.1	1.3e-223	squamosa promoter-binding-like protein 17 isoform X1 [Chenopodium quinoa]
miR156f	XM_021868312.1	0	NA	0	NA	XM_021868312.1	-	K13415|1|3.4e-18|95.9|mdm:103401427|protein brassinosteroid insensitive 1 [EC:2.7.10.1 2.7.11.1]!K20641|2|1.8e-14|83.6|cvr:CHLNCDRAFT_59250|Rho GTPase-activating protein 20	XP_021724004.1	3.6e-215	squamosa promoter-binding-like protein 17 isoform X2 [Chenopodium quinoa]
miR156f	XM_021871804.1	0	NA	0	NA	XM_021871804.1	-	K13415|1|3.0e-18|96.7|mdm:103401427|protein brassinosteroid insensitive 1 [EC:2.7.10.1 2.7.11.1]!K20641|2|2.3e-13|80.5|cvr:CHLNCDRAFT_59250|Rho GTPase-activating protein 20	XP_021727496.1	2.5e-204	squamosa promoter-binding-like protein 16 [Chenopodium quinoa]
miR156f	XM_021875189.1	1	NA	0.5	NA	XM_021875189.1	-	K13415|1|1.6e-16|91.3|mdm:103401427|protein brassinosteroid insensitive 1 [EC:2.7.10.1 2.7.11.1]!K20641|2|3.3e-14|83.6|cvr:CHLNCDRAFT_59250|Rho GTPase-activating protein 20	XP_021730881.1	0	squamosa promoter-binding-like protein 18 isoform X1 [Chenopodium quinoa]
miR156f	XM_021875197.1	1	NA	0.5	NA	XM_021875197.1	-	K13415|1|1.5e-16|91.3|mdm:103401427|protein brassinosteroid insensitive 1 [EC:2.7.10.1 2.7.11.1]!K20641|2|3.2e-14|83.6|cvr:CHLNCDRAFT_59250|Rho GTPase-activating protein 20	XP_021730889.1	0	squamosa promoter-binding-like protein 18 isoform X2 [Chenopodium quinoa]
miR156f	XM_021875206.1	1	NA	0.5	NA	XM_021875206.1	-	K13415|1|1.3e-16|91.3|mdm:103401427|protein brassinosteroid insensitive 1 [EC:2.7.10.1 2.7.11.1]!K20641|2|2.6e-14|83.6|cvr:CHLNCDRAFT_59250|Rho GTPase-activating protein 20	XP_021730881.1	4.8e-272	squamosa promoter-binding-like protein 18 isoform X1 [Chenopodium quinoa]
miR156f	XM_021881727.1	3.5	NA	2	NA	XM_021881727.1	-	K00423|1|4.1e-21|105.9|egr:104451286|L-ascorbate oxidase [EC:1.10.3.3]!K05350|2|8.9e-08|61.6|nnu:104604855|beta-glucosidase [EC:3.2.1.21]	XP_021737419.1	4.3e-218	putative F-box/LRR-repeat protein At4g15060 [Chenopodium quinoa]
miR156f	XM_021881728.1	3.5	NA	2	NA	XM_021881728.1	-	K00423|1|4.1e-21|105.9|egr:104451286|L-ascorbate oxidase [EC:1.10.3.3]!K05350|2|8.9e-08|61.6|nnu:104604855|beta-glucosidase [EC:3.2.1.21]	XP_021737419.1	4.3e-218	putative F-box/LRR-repeat protein At4g15060 [Chenopodium quinoa]
miR156f	XM_021889412.1	1	NA	0.5	NA	XM_021889412.1	-	K13415|1|1.0e-18|98.2|mdm:103401427|protein brassinosteroid insensitive 1 [EC:2.7.10.1 2.7.11.1]!K20641|2|9.0e-15|85.1|cvr:CHLNCDRAFT_59250|Rho GTPase-activating protein 20	XP_021745104.1	6.4e-269	squamosa promoter-binding-like protein 2 [Chenopodium quinoa]
miR156f	XM_021889421.1	1	NA	0.5	NA	XM_021889421.1	-	K13415|1|1.3e-18|98.2|mdm:103401427|protein brassinosteroid insensitive 1 [EC:2.7.10.1 2.7.11.1]!K20641|2|1.2e-14|85.1|cvr:CHLNCDRAFT_59250|Rho GTPase-activating protein 20	XP_021745104.1	8.4e-269	squamosa promoter-binding-like protein 2 [Chenopodium quinoa]
miR156f	XM_021889619.1	2	NA	1	NA	XM_021889619.1	GO:0005634,GO:0003677,GO:0046872,	K13415|1|4.8e-16|89.4|mdm:103401427|protein brassinosteroid insensitive 1 [EC:2.7.10.1 2.7.11.1]!K20641|2|5.1e-10|69.3|cvr:CHLNCDRAFT_59250|Rho GTPase-activating protein 20	XP_021745311.1	9e-255	squamosa promoter-binding-like protein 13A [Chenopodium quinoa]
miR156f	XM_021900841.1	1.5	NA	0.8	NA	XM_021900841.1	-	K13415|1|5.2e-16|89.0|mdm:103401427|protein brassinosteroid insensitive 1 [EC:2.7.10.1 2.7.11.1]!K20641|2|1.2e-12|77.8|cvr:CHLNCDRAFT_59250|Rho GTPase-activating protein 20	XP_021756533.1	2.9e-246	squamosa promoter-binding-like protein 6 [Chenopodium quinoa]
miR156f	XM_021901492.1	1	NA	0.5	NA	XM_021901492.1	-	K13415|1|1.3e-16|91.3|mdm:103401427|protein brassinosteroid insensitive 1 [EC:2.7.10.1 2.7.11.1]!K20641|2|1.3e-13|81.3|cvr:CHLNCDRAFT_59250|Rho GTPase-activating protein 20	XP_021757184.1	0	squamosa promoter-binding-like protein 18 isoform X1 [Chenopodium quinoa]
miR156f	XM_021901493.1	1	NA	0.5	NA	XM_021901493.1	-	K13415|1|1.4e-16|91.3|mdm:103401427|protein brassinosteroid insensitive 1 [EC:2.7.10.1 2.7.11.1]!K20641|2|1.4e-13|81.3|cvr:CHLNCDRAFT_59250|Rho GTPase-activating protein 20	XP_021757184.1	0	squamosa promoter-binding-like protein 18 isoform X1 [Chenopodium quinoa]
miR156f	XM_021901494.1	1	NA	0.5	NA	XM_021901494.1	-	K13415|1|1.2e-16|91.3|mdm:103401427|protein brassinosteroid insensitive 1 [EC:2.7.10.1 2.7.11.1]!K20641|2|1.2e-13|81.3|cvr:CHLNCDRAFT_59250|Rho GTPase-activating protein 20	XP_021757186.1	3.4e-304	teosinte glume architecture 1-like isoform X3 [Chenopodium quinoa]
miR156f	XM_021908976.1	2	NA	1	NA	XM_021908976.1	-	K03231|1|1.7e-39|166.8|mtr:MTR_8g008740|elongation factor 1-alpha!K09527|2|6.0e-16|88.6|lsv:111888013|DnaJ homolog subfamily C member 7!K10352|4|3.4e-11|72.8|mus:103974110|myosin heavy chain	XP_021764668.1	4.5e-219	interactor of constitutive active ROPs 4-like [Chenopodium quinoa]
miR156f	XM_021908977.1	2	NA	1	NA	XM_021908977.1	-	K03231|1|1.7e-39|166.8|mtr:MTR_8g008740|elongation factor 1-alpha!K09527|2|6.0e-16|88.6|lsv:111888013|DnaJ homolog subfamily C member 7!K10352|4|3.4e-11|72.8|mus:103974110|myosin heavy chain	XP_021764668.1	4.5e-219	interactor of constitutive active ROPs 4-like [Chenopodium quinoa]
miR156f	XM_021914710.1	0	NA	0	NA	XM_021914710.1	-	K13415|1|4.6e-18|95.9|mdm:103401427|protein brassinosteroid insensitive 1 [EC:2.7.10.1 2.7.11.1]!K20641|2|2.4e-14|83.6|cvr:CHLNCDRAFT_59250|Rho GTPase-activating protein 20	XP_021770402.1	8.2e-223	squamosa promoter-binding-like protein 17 [Chenopodium quinoa]
miR156f	XM_021917851.1	3	NA	2	NA	XM_021917851.1	-	K13415|1|9.8e-22|107.5|mdm:103401427|protein brassinosteroid insensitive 1 [EC:2.7.10.1 2.7.11.1]!K20641|2|2.6e-14|82.8|cvr:CHLNCDRAFT_59250|Rho GTPase-activating protein 20	XP_021773543.1	3.2e-127	squamosa promoter-binding-like protein 3 [Chenopodium quinoa]
miR156f	XR_002505691.1	3.5	NA	1.2	NA	XR_002505691.1	-	-	XP_021728480.1	2e-71	uncharacterized protein LOC110695573 [Chenopodium quinoa]
miR156f	XR_002505692.1	3.5	NA	1.2	NA	XR_002505692.1	-	-	XP_021728480.1	2e-71	uncharacterized protein LOC110695573 [Chenopodium quinoa]
miR156f	XR_002507799.1	3.5	NA	2	NA	XR_002507799.1	-	K00423|1|5.4e-21|105.9|egr:104451286|L-ascorbate oxidase [EC:1.10.3.3]!K05350|2|1.2e-07|61.6|nnu:104604855|beta-glucosidase [EC:3.2.1.21]!K10393|3|1.7e-06|57.8|nta:107828690|kinesin family member 2/24	XP_021737419.1	5.7e-210	putative F-box/LRR-repeat protein At4g15060 [Chenopodium quinoa]
miR156f	XR_002507800.1	3.5	NA	2	NA	XR_002507800.1	-	K00423|1|4.1e-21|105.9|egr:104451286|L-ascorbate oxidase [EC:1.10.3.3]!K05350|2|8.9e-08|61.6|nnu:104604855|beta-glucosidase [EC:3.2.1.21]	XP_021737419.1	2.1e-180	putative F-box/LRR-repeat protein At4g15060 [Chenopodium quinoa]
miR156f	XR_002511558.1	1	NA	0.5	NA	XR_002511558.1	-	K13415|1|1.2e-16|91.3|mdm:103401427|protein brassinosteroid insensitive 1 [EC:2.7.10.1 2.7.11.1]!K20641|2|1.3e-13|81.3|cvr:CHLNCDRAFT_59250|Rho GTPase-activating protein 20	XP_021757184.1	1.1e-302	squamosa promoter-binding-like protein 18 isoform X1 [Chenopodium quinoa]
miR156g_1	XM_021857955.1	3	NA	1.5	NA	XM_021857955.1	-	K13415|1|2.1e-18|97.1|mdm:103401427|protein brassinosteroid insensitive 1 [EC:2.7.10.1 2.7.11.1]!K20641|2|4.6e-13|79.3|cvr:CHLNCDRAFT_59250|Rho GTPase-activating protein 20	XP_021713647.1	2.1e-205	squamosa promoter-binding-like protein 16 isoform X1 [Chenopodium quinoa]
miR156g_1	XM_021857956.1	3	NA	1.5	NA	XM_021857956.1	-	K13415|1|2.1e-18|97.1|mdm:103401427|protein brassinosteroid insensitive 1 [EC:2.7.10.1 2.7.11.1]!K20641|2|4.6e-13|79.3|cvr:CHLNCDRAFT_59250|Rho GTPase-activating protein 20	XP_021713648.1	6.1e-205	squamosa promoter-binding-like protein 16 isoform X2 [Chenopodium quinoa]
miR156g_1	XM_021862675.1	3.5	NA	1.5	NA	XM_021862675.1	-	K13415|1|2.2e-17|93.6|mdm:103401427|protein brassinosteroid insensitive 1 [EC:2.7.10.1 2.7.11.1]!K20641|2|1.6e-12|77.4|cvr:CHLNCDRAFT_59250|Rho GTPase-activating protein 20	XP_021718367.1	3e-246	squamosa promoter-binding-like protein 6 isoform X1 [Chenopodium quinoa]
miR156g_1	XM_021862676.1	3.5	NA	1.5	NA	XM_021862676.1	-	K13415|1|2.3e-17|93.6|mdm:103401427|protein brassinosteroid insensitive 1 [EC:2.7.10.1 2.7.11.1]!K20641|2|1.7e-12|77.4|cvr:CHLNCDRAFT_59250|Rho GTPase-activating protein 20	XP_021718368.1	3.1e-238	squamosa promoter-binding-like protein 6 isoform X2 [Chenopodium quinoa]
miR156g_1	XM_021867382.1	3.5	NA	1.5	NA	XM_021867382.1	GO:0005634,GO:0003677,GO:0046872,	K13415|1|8.7e-17|91.3|mdm:103401427|protein brassinosteroid insensitive 1 [EC:2.7.10.1 2.7.11.1]!K20641|2|2.1e-10|70.1|cvr:CHLNCDRAFT_59250|Rho GTPase-activating protein 20	XP_021723074.1	6.7e-233	squamosa promoter-binding-like protein 13A [Chenopodium quinoa]
miR156g_1	XM_021867383.1	3.5	NA	1.5	NA	XM_021867383.1	GO:0005634,GO:0003677,GO:0046872,	K13415|1|9.5e-17|91.3|mdm:103401427|protein brassinosteroid insensitive 1 [EC:2.7.10.1 2.7.11.1]!K20641|2|2.3e-10|70.1|cvr:CHLNCDRAFT_59250|Rho GTPase-activating protein 20	XP_021723074.1	7.3e-233	squamosa promoter-binding-like protein 13A [Chenopodium quinoa]
miR156g_1	XM_021867384.1	3.5	NA	1.5	NA	XM_021867384.1	GO:0005634,GO:0003677,GO:0046872,	K13415|1|8.1e-17|91.3|mdm:103401427|protein brassinosteroid insensitive 1 [EC:2.7.10.1 2.7.11.1]!K20641|2|1.9e-10|70.1|cvr:CHLNCDRAFT_59250|Rho GTPase-activating protein 20	XP_021723074.1	6.3e-233	squamosa promoter-binding-like protein 13A [Chenopodium quinoa]
miR156g_1	XM_021867403.1	3	NA	1.5	NA	XM_021867403.1	-	K13415|1|1.3e-18|97.8|mdm:103401427|protein brassinosteroid insensitive 1 [EC:2.7.10.1 2.7.11.1]!K20641|2|1.9e-14|84.0|cvr:CHLNCDRAFT_59250|Rho GTPase-activating protein 20	XP_021723095.1	1.6e-269	squamosa promoter-binding-like protein 2 [Chenopodium quinoa]
miR156g_1	XM_021867404.1	3	NA	1.5	NA	XM_021867404.1	-	K13415|1|1.9e-18|97.8|mdm:103401427|protein brassinosteroid insensitive 1 [EC:2.7.10.1 2.7.11.1]!K20641|2|2.8e-14|84.0|cvr:CHLNCDRAFT_59250|Rho GTPase-activating protein 20	XP_021723095.1	2.3e-269	squamosa promoter-binding-like protein 2 [Chenopodium quinoa]
miR156g_1	XM_021868311.1	2	NA	1	NA	XM_021868311.1	-	K13415|1|3.5e-18|95.9|mdm:103401427|protein brassinosteroid insensitive 1 [EC:2.7.10.1 2.7.11.1]!K20641|2|1.8e-14|83.6|cvr:CHLNCDRAFT_59250|Rho GTPase-activating protein 20	XP_021724003.1	1.3e-223	squamosa promoter-binding-like protein 17 isoform X1 [Chenopodium quinoa]
miR156g_1	XM_021868312.1	2	NA	1	NA	XM_021868312.1	-	K13415|1|3.4e-18|95.9|mdm:103401427|protein brassinosteroid insensitive 1 [EC:2.7.10.1 2.7.11.1]!K20641|2|1.8e-14|83.6|cvr:CHLNCDRAFT_59250|Rho GTPase-activating protein 20	XP_021724004.1	3.6e-215	squamosa promoter-binding-like protein 17 isoform X2 [Chenopodium quinoa]
miR156g_1	XM_021871804.1	3	NA	1.5	NA	XM_021871804.1	-	K13415|1|3.0e-18|96.7|mdm:103401427|protein brassinosteroid insensitive 1 [EC:2.7.10.1 2.7.11.1]!K20641|2|2.3e-13|80.5|cvr:CHLNCDRAFT_59250|Rho GTPase-activating protein 20	XP_021727496.1	2.5e-204	squamosa promoter-binding-like protein 16 [Chenopodium quinoa]
miR156g_1	XM_021875189.1	2.5	NA	1.2	NA	XM_021875189.1	-	K13415|1|1.6e-16|91.3|mdm:103401427|protein brassinosteroid insensitive 1 [EC:2.7.10.1 2.7.11.1]!K20641|2|3.3e-14|83.6|cvr:CHLNCDRAFT_59250|Rho GTPase-activating protein 20	XP_021730881.1	0	squamosa promoter-binding-like protein 18 isoform X1 [Chenopodium quinoa]
miR156g_1	XM_021875197.1	2.5	NA	1.2	NA	XM_021875197.1	-	K13415|1|1.5e-16|91.3|mdm:103401427|protein brassinosteroid insensitive 1 [EC:2.7.10.1 2.7.11.1]!K20641|2|3.2e-14|83.6|cvr:CHLNCDRAFT_59250|Rho GTPase-activating protein 20	XP_021730889.1	0	squamosa promoter-binding-like protein 18 isoform X2 [Chenopodium quinoa]
miR156g_1	XM_021875206.1	2.5	NA	1.2	NA	XM_021875206.1	-	K13415|1|1.3e-16|91.3|mdm:103401427|protein brassinosteroid insensitive 1 [EC:2.7.10.1 2.7.11.1]!K20641|2|2.6e-14|83.6|cvr:CHLNCDRAFT_59250|Rho GTPase-activating protein 20	XP_021730881.1	4.8e-272	squamosa promoter-binding-like protein 18 isoform X1 [Chenopodium quinoa]
miR156g_1	XM_021889412.1	3	NA	1.5	NA	XM_021889412.1	-	K13415|1|1.0e-18|98.2|mdm:103401427|protein brassinosteroid insensitive 1 [EC:2.7.10.1 2.7.11.1]!K20641|2|9.0e-15|85.1|cvr:CHLNCDRAFT_59250|Rho GTPase-activating protein 20	XP_021745104.1	6.4e-269	squamosa promoter-binding-like protein 2 [Chenopodium quinoa]
miR156g_1	XM_021889421.1	3	NA	1.5	NA	XM_021889421.1	-	K13415|1|1.3e-18|98.2|mdm:103401427|protein brassinosteroid insensitive 1 [EC:2.7.10.1 2.7.11.1]!K20641|2|1.2e-14|85.1|cvr:CHLNCDRAFT_59250|Rho GTPase-activating protein 20	XP_021745104.1	8.4e-269	squamosa promoter-binding-like protein 2 [Chenopodium quinoa]
miR156g_1	XM_021889619.1	3.5	NA	1.5	NA	XM_021889619.1	GO:0005634,GO:0003677,GO:0046872,	K13415|1|4.8e-16|89.4|mdm:103401427|protein brassinosteroid insensitive 1 [EC:2.7.10.1 2.7.11.1]!K20641|2|5.1e-10|69.3|cvr:CHLNCDRAFT_59250|Rho GTPase-activating protein 20	XP_021745311.1	9e-255	squamosa promoter-binding-like protein 13A [Chenopodium quinoa]
miR156g_1	XM_021897533.1	3.5	NA	2.5	NA	XM_021897533.1	-	K05681|1|7.1e-115|417.5|smo:SELMODRAFT_10835|ATP-binding cassette, subfamily G (WHITE), member 2	XP_021753225.1	0	ABC transporter G family member 11-like [Chenopodium quinoa]
miR156g_1	XM_021900841.1	3.5	NA	1.5	NA	XM_021900841.1	-	K13415|1|5.2e-16|89.0|mdm:103401427|protein brassinosteroid insensitive 1 [EC:2.7.10.1 2.7.11.1]!K20641|2|1.2e-12|77.8|cvr:CHLNCDRAFT_59250|Rho GTPase-activating protein 20	XP_021756533.1	2.9e-246	squamosa promoter-binding-like protein 6 [Chenopodium quinoa]
miR156g_1	XM_021901492.1	2.5	NA	1.2	NA	XM_021901492.1	-	K13415|1|1.3e-16|91.3|mdm:103401427|protein brassinosteroid insensitive 1 [EC:2.7.10.1 2.7.11.1]!K20641|2|1.3e-13|81.3|cvr:CHLNCDRAFT_59250|Rho GTPase-activating protein 20	XP_021757184.1	0	squamosa promoter-binding-like protein 18 isoform X1 [Chenopodium quinoa]
miR156g_1	XM_021901493.1	2.5	NA	1.2	NA	XM_021901493.1	-	K13415|1|1.4e-16|91.3|mdm:103401427|protein brassinosteroid insensitive 1 [EC:2.7.10.1 2.7.11.1]!K20641|2|1.4e-13|81.3|cvr:CHLNCDRAFT_59250|Rho GTPase-activating protein 20	XP_021757184.1	0	squamosa promoter-binding-like protein 18 isoform X1 [Chenopodium quinoa]
miR156g_1	XM_021901494.1	2.5	NA	1.2	NA	XM_021901494.1	-	K13415|1|1.2e-16|91.3|mdm:103401427|protein brassinosteroid insensitive 1 [EC:2.7.10.1 2.7.11.1]!K20641|2|1.2e-13|81.3|cvr:CHLNCDRAFT_59250|Rho GTPase-activating protein 20	XP_021757186.1	3.4e-304	teosinte glume architecture 1-like isoform X3 [Chenopodium quinoa]
miR156g_1	XM_021908163.1	3.5	NA	2.2	NA	XM_021908163.1	-	-	XP_021763855.1	8.6e-239	F-box protein At5g46170-like [Chenopodium quinoa]
miR156g_1	XM_021908323.1	2.5	NA	1.2	NA	XM_021908323.1	-	K18195|1|1.0e-23|113.6|thj:104807150|rhamnogalacturonan endolyase [EC:4.2.2.23]!K22804|2|1.8e-15|86.3|bna:106442438|structural maintenance of chromosomes protein 6!K02641|3|5.7e-14|81.3|jre:108997663|ferredoxin--NADP+ reductase [EC:1.18.1.2]!K14297|4|1.5e-06|56.6|nsy:104215433|nuclear pore complex protein Nup98-Nup96	XP_021764015.1	1.3e-202	uncharacterized protein LOC110728681 [Chenopodium quinoa]
miR156g_1	XM_021914710.1	2	NA	1	NA	XM_021914710.1	-	K13415|1|4.6e-18|95.9|mdm:103401427|protein brassinosteroid insensitive 1 [EC:2.7.10.1 2.7.11.1]!K20641|2|2.4e-14|83.6|cvr:CHLNCDRAFT_59250|Rho GTPase-activating protein 20	XP_021770402.1	8.2e-223	squamosa promoter-binding-like protein 17 [Chenopodium quinoa]
miR156g_1	XR_002507830.1	2.5	NA	1.2	NA	XR_002507830.1	-	-	-	-	-
miR156g_1	XR_002511334.1	3.5	NA	2	NA	XR_002511334.1	-	-	-	-	-
miR156g_1	XR_002511335.1	3.5	NA	2	NA	XR_002511335.1	-	-	-	-	-
miR156g_1	XR_002511558.1	2.5	NA	1.2	NA	XR_002511558.1	-	K13415|1|1.2e-16|91.3|mdm:103401427|protein brassinosteroid insensitive 1 [EC:2.7.10.1 2.7.11.1]!K20641|2|1.3e-13|81.3|cvr:CHLNCDRAFT_59250|Rho GTPase-activating protein 20	XP_021757184.1	1.1e-302	squamosa promoter-binding-like protein 18 isoform X1 [Chenopodium quinoa]
miR156h_1	XM_021857955.1	2	NA	1	NA	XM_021857955.1	-	K13415|1|2.1e-18|97.1|mdm:103401427|protein brassinosteroid insensitive 1 [EC:2.7.10.1 2.7.11.1]!K20641|2|4.6e-13|79.3|cvr:CHLNCDRAFT_59250|Rho GTPase-activating protein 20	XP_021713647.1	2.1e-205	squamosa promoter-binding-like protein 16 isoform X1 [Chenopodium quinoa]
miR156h_1	XM_021857956.1	2	NA	1	NA	XM_021857956.1	-	K13415|1|2.1e-18|97.1|mdm:103401427|protein brassinosteroid insensitive 1 [EC:2.7.10.1 2.7.11.1]!K20641|2|4.6e-13|79.3|cvr:CHLNCDRAFT_59250|Rho GTPase-activating protein 20	XP_021713648.1	6.1e-205	squamosa promoter-binding-like protein 16 isoform X2 [Chenopodium quinoa]
miR156h_1	XM_021862675.1	2	NA	1	NA	XM_021862675.1	-	K13415|1|2.2e-17|93.6|mdm:103401427|protein brassinosteroid insensitive 1 [EC:2.7.10.1 2.7.11.1]!K20641|2|1.6e-12|77.4|cvr:CHLNCDRAFT_59250|Rho GTPase-activating protein 20	XP_021718367.1	3e-246	squamosa promoter-binding-like protein 6 isoform X1 [Chenopodium quinoa]
miR156h_1	XM_021862676.1	2	NA	1	NA	XM_021862676.1	-	K13415|1|2.3e-17|93.6|mdm:103401427|protein brassinosteroid insensitive 1 [EC:2.7.10.1 2.7.11.1]!K20641|2|1.7e-12|77.4|cvr:CHLNCDRAFT_59250|Rho GTPase-activating protein 20	XP_021718368.1	3.1e-238	squamosa promoter-binding-like protein 6 isoform X2 [Chenopodium quinoa]
miR156h_1	XM_021867382.1	2	NA	1	NA	XM_021867382.1	GO:0005634,GO:0003677,GO:0046872,	K13415|1|8.7e-17|91.3|mdm:103401427|protein brassinosteroid insensitive 1 [EC:2.7.10.1 2.7.11.1]!K20641|2|2.1e-10|70.1|cvr:CHLNCDRAFT_59250|Rho GTPase-activating protein 20	XP_021723074.1	6.7e-233	squamosa promoter-binding-like protein 13A [Chenopodium quinoa]
miR156h_1	XM_021867383.1	2	NA	1	NA	XM_021867383.1	GO:0005634,GO:0003677,GO:0046872,	K13415|1|9.5e-17|91.3|mdm:103401427|protein brassinosteroid insensitive 1 [EC:2.7.10.1 2.7.11.1]!K20641|2|2.3e-10|70.1|cvr:CHLNCDRAFT_59250|Rho GTPase-activating protein 20	XP_021723074.1	7.3e-233	squamosa promoter-binding-like protein 13A [Chenopodium quinoa]
miR156h_1	XM_021867384.1	2	NA	1	NA	XM_021867384.1	GO:0005634,GO:0003677,GO:0046872,	K13415|1|8.1e-17|91.3|mdm:103401427|protein brassinosteroid insensitive 1 [EC:2.7.10.1 2.7.11.1]!K20641|2|1.9e-10|70.1|cvr:CHLNCDRAFT_59250|Rho GTPase-activating protein 20	XP_021723074.1	6.3e-233	squamosa promoter-binding-like protein 13A [Chenopodium quinoa]
miR156h_1	XM_021867403.1	2	NA	1	NA	XM_021867403.1	-	K13415|1|1.3e-18|97.8|mdm:103401427|protein brassinosteroid insensitive 1 [EC:2.7.10.1 2.7.11.1]!K20641|2|1.9e-14|84.0|cvr:CHLNCDRAFT_59250|Rho GTPase-activating protein 20	XP_021723095.1	1.6e-269	squamosa promoter-binding-like protein 2 [Chenopodium quinoa]
miR156h_1	XM_021867404.1	2	NA	1	NA	XM_021867404.1	-	K13415|1|1.9e-18|97.8|mdm:103401427|protein brassinosteroid insensitive 1 [EC:2.7.10.1 2.7.11.1]!K20641|2|2.8e-14|84.0|cvr:CHLNCDRAFT_59250|Rho GTPase-activating protein 20	XP_021723095.1	2.3e-269	squamosa promoter-binding-like protein 2 [Chenopodium quinoa]
miR156h_1	XM_021868311.1	2	NA	1	NA	XM_021868311.1	-	K13415|1|3.5e-18|95.9|mdm:103401427|protein brassinosteroid insensitive 1 [EC:2.7.10.1 2.7.11.1]!K20641|2|1.8e-14|83.6|cvr:CHLNCDRAFT_59250|Rho GTPase-activating protein 20	XP_021724003.1	1.3e-223	squamosa promoter-binding-like protein 17 isoform X1 [Chenopodium quinoa]
miR156h_1	XM_021868312.1	2	NA	1	NA	XM_021868312.1	-	K13415|1|3.4e-18|95.9|mdm:103401427|protein brassinosteroid insensitive 1 [EC:2.7.10.1 2.7.11.1]!K20641|2|1.8e-14|83.6|cvr:CHLNCDRAFT_59250|Rho GTPase-activating protein 20	XP_021724004.1	3.6e-215	squamosa promoter-binding-like protein 17 isoform X2 [Chenopodium quinoa]
miR156h_1	XM_021870788.1	3	NA	1.5	NA	XM_021870788.1	-	K13415|1|5.3e-17|91.3|mdm:103401427|protein brassinosteroid insensitive 1 [EC:2.7.10.1 2.7.11.1]!K20641|2|1.0e-07|60.5|cvr:CHLNCDRAFT_59250|Rho GTPase-activating protein 20	XP_021726480.1	7.3e-73	squamosa promoter-binding protein 1-like isoform X1 [Chenopodium quinoa]
miR156h_1	XM_021870789.1	3	NA	1.5	NA	XM_021870789.1	-	K13415|1|5.4e-21|104.4|mdm:103401427|protein brassinosteroid insensitive 1 [EC:2.7.10.1 2.7.11.1]!K20641|2|1.0e-11|73.6|cvr:CHLNCDRAFT_59250|Rho GTPase-activating protein 20	XP_021726481.1	5e-57	squamosa promoter-binding protein 1-like isoform X2 [Chenopodium quinoa]
miR156h_1	XM_021871804.1	2	NA	1	NA	XM_021871804.1	-	K13415|1|3.0e-18|96.7|mdm:103401427|protein brassinosteroid insensitive 1 [EC:2.7.10.1 2.7.11.1]!K20641|2|2.3e-13|80.5|cvr:CHLNCDRAFT_59250|Rho GTPase-activating protein 20	XP_021727496.1	2.5e-204	squamosa promoter-binding-like protein 16 [Chenopodium quinoa]
miR156h_1	XM_021873594.1	3.5	NA	2	NA	XM_021873594.1	-	K03006|1|2.0e-180|635.6|cqi:110739554|DNA-directed RNA polymerase II subunit RPB1 [EC:2.7.7.6]	XP_021729286.1	0	leucine-rich repeat extensin-like protein 4 [Chenopodium quinoa]
miR156h_1	XM_021875189.1	2	NA	1	NA	XM_021875189.1	-	K13415|1|1.6e-16|91.3|mdm:103401427|protein brassinosteroid insensitive 1 [EC:2.7.10.1 2.7.11.1]!K20641|2|3.3e-14|83.6|cvr:CHLNCDRAFT_59250|Rho GTPase-activating protein 20	XP_021730881.1	0	squamosa promoter-binding-like protein 18 isoform X1 [Chenopodium quinoa]
miR156h_1	XM_021875197.1	2	NA	1	NA	XM_021875197.1	-	K13415|1|1.5e-16|91.3|mdm:103401427|protein brassinosteroid insensitive 1 [EC:2.7.10.1 2.7.11.1]!K20641|2|3.2e-14|83.6|cvr:CHLNCDRAFT_59250|Rho GTPase-activating protein 20	XP_021730889.1	0	squamosa promoter-binding-like protein 18 isoform X2 [Chenopodium quinoa]
miR156h_1	XM_021875206.1	2	NA	1	NA	XM_021875206.1	-	K13415|1|1.3e-16|91.3|mdm:103401427|protein brassinosteroid insensitive 1 [EC:2.7.10.1 2.7.11.1]!K20641|2|2.6e-14|83.6|cvr:CHLNCDRAFT_59250|Rho GTPase-activating protein 20	XP_021730881.1	4.8e-272	squamosa promoter-binding-like protein 18 isoform X1 [Chenopodium quinoa]
miR156h_1	XM_021884935.1	3	NA	1.5	NA	XM_021884935.1	-	K13415|1|3.6e-16|88.6|mdm:103401427|protein brassinosteroid insensitive 1 [EC:2.7.10.1 2.7.11.1]!K20641|2|4.0e-07|58.5|cvr:CHLNCDRAFT_59250|Rho GTPase-activating protein 20	XP_021740627.1	2.4e-71	squamosa promoter-binding protein 1-like [Chenopodium quinoa]
miR156h_1	XM_021888555.1	3.5	NA	2	NA	XM_021888555.1	-	K03006|1|3.1e-201|704.5|cqi:110739554|DNA-directed RNA polymerase II subunit RPB1 [EC:2.7.7.6]	XP_021744247.1	0	leucine-rich repeat extensin-like protein 4 [Chenopodium quinoa]
miR156h_1	XM_021889412.1	2	NA	1	NA	XM_021889412.1	-	K13415|1|1.0e-18|98.2|mdm:103401427|protein brassinosteroid insensitive 1 [EC:2.7.10.1 2.7.11.1]!K20641|2|9.0e-15|85.1|cvr:CHLNCDRAFT_59250|Rho GTPase-activating protein 20	XP_021745104.1	6.4e-269	squamosa promoter-binding-like protein 2 [Chenopodium quinoa]
miR156h_1	XM_021889421.1	2	NA	1	NA	XM_021889421.1	-	K13415|1|1.3e-18|98.2|mdm:103401427|protein brassinosteroid insensitive 1 [EC:2.7.10.1 2.7.11.1]!K20641|2|1.2e-14|85.1|cvr:CHLNCDRAFT_59250|Rho GTPase-activating protein 20	XP_021745104.1	8.4e-269	squamosa promoter-binding-like protein 2 [Chenopodium quinoa]
miR156h_1	XM_021889619.1	2	NA	1	NA	XM_021889619.1	GO:0005634,GO:0003677,GO:0046872,	K13415|1|4.8e-16|89.4|mdm:103401427|protein brassinosteroid insensitive 1 [EC:2.7.10.1 2.7.11.1]!K20641|2|5.1e-10|69.3|cvr:CHLNCDRAFT_59250|Rho GTPase-activating protein 20	XP_021745311.1	9e-255	squamosa promoter-binding-like protein 13A [Chenopodium quinoa]
miR156h_1	XM_021900841.1	2	NA	1	NA	XM_021900841.1	-	K13415|1|5.2e-16|89.0|mdm:103401427|protein brassinosteroid insensitive 1 [EC:2.7.10.1 2.7.11.1]!K20641|2|1.2e-12|77.8|cvr:CHLNCDRAFT_59250|Rho GTPase-activating protein 20	XP_021756533.1	2.9e-246	squamosa promoter-binding-like protein 6 [Chenopodium quinoa]
miR156h_1	XM_021901492.1	2	NA	1	NA	XM_021901492.1	-	K13415|1|1.3e-16|91.3|mdm:103401427|protein brassinosteroid insensitive 1 [EC:2.7.10.1 2.7.11.1]!K20641|2|1.3e-13|81.3|cvr:CHLNCDRAFT_59250|Rho GTPase-activating protein 20	XP_021757184.1	0	squamosa promoter-binding-like protein 18 isoform X1 [Chenopodium quinoa]
miR156h_1	XM_021901493.1	2	NA	1	NA	XM_021901493.1	-	K13415|1|1.4e-16|91.3|mdm:103401427|protein brassinosteroid insensitive 1 [EC:2.7.10.1 2.7.11.1]!K20641|2|1.4e-13|81.3|cvr:CHLNCDRAFT_59250|Rho GTPase-activating protein 20	XP_021757184.1	0	squamosa promoter-binding-like protein 18 isoform X1 [Chenopodium quinoa]
miR156h_1	XM_021901494.1	2	NA	1	NA	XM_021901494.1	-	K13415|1|1.2e-16|91.3|mdm:103401427|protein brassinosteroid insensitive 1 [EC:2.7.10.1 2.7.11.1]!K20641|2|1.2e-13|81.3|cvr:CHLNCDRAFT_59250|Rho GTPase-activating protein 20	XP_021757186.1	3.4e-304	teosinte glume architecture 1-like isoform X3 [Chenopodium quinoa]
miR156h_1	XM_021907748.1	3.5	NA	2.5	NA	XM_021907748.1	GO:0005524,GO:0004672,	K04733|1|6.1e-126|453.8|cqi:110728108|interleukin-1 receptor-associated kinase 4 [EC:2.7.11.1]	XP_021763440.1	4.7e-209	probable serine/threonine-protein kinase PBL26, partial [Chenopodium quinoa]
miR156h_1	XM_021911750.1	3.5	NA	2.5	NA	XM_021911750.1	GO:0005524,GO:0004672,	K04733|1|1.0e-115|420.2|cqi:110731786|interleukin-1 receptor-associated kinase 4 [EC:2.7.11.1]	XP_021763440.1	2.5e-176	probable serine/threonine-protein kinase PBL26, partial [Chenopodium quinoa]
miR156h_1	XM_021914710.1	2	NA	1	NA	XM_021914710.1	-	K13415|1|4.6e-18|95.9|mdm:103401427|protein brassinosteroid insensitive 1 [EC:2.7.10.1 2.7.11.1]!K20641|2|2.4e-14|83.6|cvr:CHLNCDRAFT_59250|Rho GTPase-activating protein 20	XP_021770402.1	8.2e-223	squamosa promoter-binding-like protein 17 [Chenopodium quinoa]
miR156h_1	XM_021918899.1	3.5	NA	1.8	NA	XM_021918899.1	-	-	XP_021774591.1	1.4e-120	uncharacterized protein LOC110738486 [Chenopodium quinoa]
miR156h_1	XR_002506975.1	3.5	NA	2.5	NA	XR_002506975.1	-	K14311|1|5.9e-43|177.9|cqi:110739698|nuclear pore complex protein Nup188	XP_021775850.1	3.1e-42	uncharacterized protein LOC110739698 isoform X1 [Chenopodium quinoa]
miR156h_1	XR_002508412.1	3	NA	1.5	NA	XR_002508412.1	-	K13415|1|1.5e-08|62.8|mdm:103401427|protein brassinosteroid insensitive 1 [EC:2.7.10.1 2.7.11.1]	XP_021740627.1	3.8e-34	squamosa promoter-binding protein 1-like [Chenopodium quinoa]
miR156h_1	XR_002511558.1	2	NA	1	NA	XR_002511558.1	-	K13415|1|1.2e-16|91.3|mdm:103401427|protein brassinosteroid insensitive 1 [EC:2.7.10.1 2.7.11.1]!K20641|2|1.3e-13|81.3|cvr:CHLNCDRAFT_59250|Rho GTPase-activating protein 20	XP_021757184.1	1.1e-302	squamosa promoter-binding-like protein 18 isoform X1 [Chenopodium quinoa]
miR156h_1	XR_002512246.1	3.5	NA	2.5	NA	XR_002512246.1	-	-	-	-	-
miR156h_1	XR_002513149.1	3.5	NA	2.5	NA	XR_002513149.1	-	-	-	-	-
miR156k	XM_021857955.1	0	NA	0	NA	XM_021857955.1	-	K13415|1|2.1e-18|97.1|mdm:103401427|protein brassinosteroid insensitive 1 [EC:2.7.10.1 2.7.11.1]!K20641|2|4.6e-13|79.3|cvr:CHLNCDRAFT_59250|Rho GTPase-activating protein 20	XP_021713647.1	2.1e-205	squamosa promoter-binding-like protein 16 isoform X1 [Chenopodium quinoa]
miR156k	XM_021857956.1	0	NA	0	NA	XM_021857956.1	-	K13415|1|2.1e-18|97.1|mdm:103401427|protein brassinosteroid insensitive 1 [EC:2.7.10.1 2.7.11.1]!K20641|2|4.6e-13|79.3|cvr:CHLNCDRAFT_59250|Rho GTPase-activating protein 20	XP_021713648.1	6.1e-205	squamosa promoter-binding-like protein 16 isoform X2 [Chenopodium quinoa]
miR156k	XM_021862675.1	1	NA	0.5	NA	XM_021862675.1	-	K13415|1|2.2e-17|93.6|mdm:103401427|protein brassinosteroid insensitive 1 [EC:2.7.10.1 2.7.11.1]!K20641|2|1.6e-12|77.4|cvr:CHLNCDRAFT_59250|Rho GTPase-activating protein 20	XP_021718367.1	3e-246	squamosa promoter-binding-like protein 6 isoform X1 [Chenopodium quinoa]
miR156k	XM_021862676.1	1	NA	0.5	NA	XM_021862676.1	-	K13415|1|2.3e-17|93.6|mdm:103401427|protein brassinosteroid insensitive 1 [EC:2.7.10.1 2.7.11.1]!K20641|2|1.7e-12|77.4|cvr:CHLNCDRAFT_59250|Rho GTPase-activating protein 20	XP_021718368.1	3.1e-238	squamosa promoter-binding-like protein 6 isoform X2 [Chenopodium quinoa]
miR156k	XM_021863611.1	3	NA	1.5	NA	XM_021863611.1	-	K13415|1|2.1e-21|106.3|mdm:103401427|protein brassinosteroid insensitive 1 [EC:2.7.10.1 2.7.11.1]	XP_021719303.1	3.6e-128	squamosa promoter-binding-like protein 3 [Chenopodium quinoa]
miR156k	XM_021867382.1	1	NA	0.5	NA	XM_021867382.1	GO:0005634,GO:0003677,GO:0046872,	K13415|1|8.7e-17|91.3|mdm:103401427|protein brassinosteroid insensitive 1 [EC:2.7.10.1 2.7.11.1]!K20641|2|2.1e-10|70.1|cvr:CHLNCDRAFT_59250|Rho GTPase-activating protein 20	XP_021723074.1	6.7e-233	squamosa promoter-binding-like protein 13A [Chenopodium quinoa]
miR156k	XM_021867383.1	1	NA	0.5	NA	XM_021867383.1	GO:0005634,GO:0003677,GO:0046872,	K13415|1|9.5e-17|91.3|mdm:103401427|protein brassinosteroid insensitive 1 [EC:2.7.10.1 2.7.11.1]!K20641|2|2.3e-10|70.1|cvr:CHLNCDRAFT_59250|Rho GTPase-activating protein 20	XP_021723074.1	7.3e-233	squamosa promoter-binding-like protein 13A [Chenopodium quinoa]
miR156k	XM_021867384.1	1	NA	0.5	NA	XM_021867384.1	GO:0005634,GO:0003677,GO:0046872,	K13415|1|8.1e-17|91.3|mdm:103401427|protein brassinosteroid insensitive 1 [EC:2.7.10.1 2.7.11.1]!K20641|2|1.9e-10|70.1|cvr:CHLNCDRAFT_59250|Rho GTPase-activating protein 20	XP_021723074.1	6.3e-233	squamosa promoter-binding-like protein 13A [Chenopodium quinoa]
miR156k	XM_021867403.1	1	NA	0.5	NA	XM_021867403.1	-	K13415|1|1.3e-18|97.8|mdm:103401427|protein brassinosteroid insensitive 1 [EC:2.7.10.1 2.7.11.1]!K20641|2|1.9e-14|84.0|cvr:CHLNCDRAFT_59250|Rho GTPase-activating protein 20	XP_021723095.1	1.6e-269	squamosa promoter-binding-like protein 2 [Chenopodium quinoa]
miR156k	XM_021867404.1	1	NA	0.5	NA	XM_021867404.1	-	K13415|1|1.9e-18|97.8|mdm:103401427|protein brassinosteroid insensitive 1 [EC:2.7.10.1 2.7.11.1]!K20641|2|2.8e-14|84.0|cvr:CHLNCDRAFT_59250|Rho GTPase-activating protein 20	XP_021723095.1	2.3e-269	squamosa promoter-binding-like protein 2 [Chenopodium quinoa]
miR156k	XM_021868311.1	0	NA	0	NA	XM_021868311.1	-	K13415|1|3.5e-18|95.9|mdm:103401427|protein brassinosteroid insensitive 1 [EC:2.7.10.1 2.7.11.1]!K20641|2|1.8e-14|83.6|cvr:CHLNCDRAFT_59250|Rho GTPase-activating protein 20	XP_021724003.1	1.3e-223	squamosa promoter-binding-like protein 17 isoform X1 [Chenopodium quinoa]
miR156k	XM_021868312.1	0	NA	0	NA	XM_021868312.1	-	K13415|1|3.4e-18|95.9|mdm:103401427|protein brassinosteroid insensitive 1 [EC:2.7.10.1 2.7.11.1]!K20641|2|1.8e-14|83.6|cvr:CHLNCDRAFT_59250|Rho GTPase-activating protein 20	XP_021724004.1	3.6e-215	squamosa promoter-binding-like protein 17 isoform X2 [Chenopodium quinoa]
miR156k	XM_021871804.1	0	NA	0	NA	XM_021871804.1	-	K13415|1|3.0e-18|96.7|mdm:103401427|protein brassinosteroid insensitive 1 [EC:2.7.10.1 2.7.11.1]!K20641|2|2.3e-13|80.5|cvr:CHLNCDRAFT_59250|Rho GTPase-activating protein 20	XP_021727496.1	2.5e-204	squamosa promoter-binding-like protein 16 [Chenopodium quinoa]
miR156k	XM_021875189.1	0	NA	0	NA	XM_021875189.1	-	K13415|1|1.6e-16|91.3|mdm:103401427|protein brassinosteroid insensitive 1 [EC:2.7.10.1 2.7.11.1]!K20641|2|3.3e-14|83.6|cvr:CHLNCDRAFT_59250|Rho GTPase-activating protein 20	XP_021730881.1	0	squamosa promoter-binding-like protein 18 isoform X1 [Chenopodium quinoa]
miR156k	XM_021875197.1	0	NA	0	NA	XM_021875197.1	-	K13415|1|1.5e-16|91.3|mdm:103401427|protein brassinosteroid insensitive 1 [EC:2.7.10.1 2.7.11.1]!K20641|2|3.2e-14|83.6|cvr:CHLNCDRAFT_59250|Rho GTPase-activating protein 20	XP_021730889.1	0	squamosa promoter-binding-like protein 18 isoform X2 [Chenopodium quinoa]
miR156k	XM_021875206.1	0	NA	0	NA	XM_021875206.1	-	K13415|1|1.3e-16|91.3|mdm:103401427|protein brassinosteroid insensitive 1 [EC:2.7.10.1 2.7.11.1]!K20641|2|2.6e-14|83.6|cvr:CHLNCDRAFT_59250|Rho GTPase-activating protein 20	XP_021730881.1	4.8e-272	squamosa promoter-binding-like protein 18 isoform X1 [Chenopodium quinoa]
miR156k	XM_021881727.1	3	NA	2.5	NA	XM_021881727.1	-	K00423|1|4.1e-21|105.9|egr:104451286|L-ascorbate oxidase [EC:1.10.3.3]!K05350|2|8.9e-08|61.6|nnu:104604855|beta-glucosidase [EC:3.2.1.21]	XP_021737419.1	4.3e-218	putative F-box/LRR-repeat protein At4g15060 [Chenopodium quinoa]
miR156k	XM_021881728.1	3	NA	2.5	NA	XM_021881728.1	-	K00423|1|4.1e-21|105.9|egr:104451286|L-ascorbate oxidase [EC:1.10.3.3]!K05350|2|8.9e-08|61.6|nnu:104604855|beta-glucosidase [EC:3.2.1.21]	XP_021737419.1	4.3e-218	putative F-box/LRR-repeat protein At4g15060 [Chenopodium quinoa]
miR156k	XM_021889412.1	1	NA	0.5	NA	XM_021889412.1	-	K13415|1|1.0e-18|98.2|mdm:103401427|protein brassinosteroid insensitive 1 [EC:2.7.10.1 2.7.11.1]!K20641|2|9.0e-15|85.1|cvr:CHLNCDRAFT_59250|Rho GTPase-activating protein 20	XP_021745104.1	6.4e-269	squamosa promoter-binding-like protein 2 [Chenopodium quinoa]
miR156k	XM_021889421.1	1	NA	0.5	NA	XM_021889421.1	-	K13415|1|1.3e-18|98.2|mdm:103401427|protein brassinosteroid insensitive 1 [EC:2.7.10.1 2.7.11.1]!K20641|2|1.2e-14|85.1|cvr:CHLNCDRAFT_59250|Rho GTPase-activating protein 20	XP_021745104.1	8.4e-269	squamosa promoter-binding-like protein 2 [Chenopodium quinoa]
miR156k	XM_021889619.1	1	NA	0.5	NA	XM_021889619.1	GO:0005634,GO:0003677,GO:0046872,	K13415|1|4.8e-16|89.4|mdm:103401427|protein brassinosteroid insensitive 1 [EC:2.7.10.1 2.7.11.1]!K20641|2|5.1e-10|69.3|cvr:CHLNCDRAFT_59250|Rho GTPase-activating protein 20	XP_021745311.1	9e-255	squamosa promoter-binding-like protein 13A [Chenopodium quinoa]
miR156k	XM_021900841.1	1	NA	0.5	NA	XM_021900841.1	-	K13415|1|5.2e-16|89.0|mdm:103401427|protein brassinosteroid insensitive 1 [EC:2.7.10.1 2.7.11.1]!K20641|2|1.2e-12|77.8|cvr:CHLNCDRAFT_59250|Rho GTPase-activating protein 20	XP_021756533.1	2.9e-246	squamosa promoter-binding-like protein 6 [Chenopodium quinoa]
miR156k	XM_021901492.1	0	NA	0	NA	XM_021901492.1	-	K13415|1|1.3e-16|91.3|mdm:103401427|protein brassinosteroid insensitive 1 [EC:2.7.10.1 2.7.11.1]!K20641|2|1.3e-13|81.3|cvr:CHLNCDRAFT_59250|Rho GTPase-activating protein 20	XP_021757184.1	0	squamosa promoter-binding-like protein 18 isoform X1 [Chenopodium quinoa]
miR156k	XM_021901493.1	0	NA	0	NA	XM_021901493.1	-	K13415|1|1.4e-16|91.3|mdm:103401427|protein brassinosteroid insensitive 1 [EC:2.7.10.1 2.7.11.1]!K20641|2|1.4e-13|81.3|cvr:CHLNCDRAFT_59250|Rho GTPase-activating protein 20	XP_021757184.1	0	squamosa promoter-binding-like protein 18 isoform X1 [Chenopodium quinoa]
miR156k	XM_021901494.1	0	NA	0	NA	XM_021901494.1	-	K13415|1|1.2e-16|91.3|mdm:103401427|protein brassinosteroid insensitive 1 [EC:2.7.10.1 2.7.11.1]!K20641|2|1.2e-13|81.3|cvr:CHLNCDRAFT_59250|Rho GTPase-activating protein 20	XP_021757186.1	3.4e-304	teosinte glume architecture 1-like isoform X3 [Chenopodium quinoa]
miR156k	XM_021908163.1	2	NA	1	NA	XM_021908163.1	-	-	XP_021763855.1	8.6e-239	F-box protein At5g46170-like [Chenopodium quinoa]
miR156k	XM_021908976.1	2	NA	1	NA	XM_021908976.1	-	K03231|1|1.7e-39|166.8|mtr:MTR_8g008740|elongation factor 1-alpha!K09527|2|6.0e-16|88.6|lsv:111888013|DnaJ homolog subfamily C member 7!K10352|4|3.4e-11|72.8|mus:103974110|myosin heavy chain	XP_021764668.1	4.5e-219	interactor of constitutive active ROPs 4-like [Chenopodium quinoa]
miR156k	XM_021908977.1	2	NA	1	NA	XM_021908977.1	-	K03231|1|1.7e-39|166.8|mtr:MTR_8g008740|elongation factor 1-alpha!K09527|2|6.0e-16|88.6|lsv:111888013|DnaJ homolog subfamily C member 7!K10352|4|3.4e-11|72.8|mus:103974110|myosin heavy chain	XP_021764668.1	4.5e-219	interactor of constitutive active ROPs 4-like [Chenopodium quinoa]
miR156k	XM_021914710.1	0	NA	0	NA	XM_021914710.1	-	K13415|1|4.6e-18|95.9|mdm:103401427|protein brassinosteroid insensitive 1 [EC:2.7.10.1 2.7.11.1]!K20641|2|2.4e-14|83.6|cvr:CHLNCDRAFT_59250|Rho GTPase-activating protein 20	XP_021770402.1	8.2e-223	squamosa promoter-binding-like protein 17 [Chenopodium quinoa]
miR156k	XM_021917851.1	2	NA	1.5	NA	XM_021917851.1	-	K13415|1|9.8e-22|107.5|mdm:103401427|protein brassinosteroid insensitive 1 [EC:2.7.10.1 2.7.11.1]!K20641|2|2.6e-14|82.8|cvr:CHLNCDRAFT_59250|Rho GTPase-activating protein 20	XP_021773543.1	3.2e-127	squamosa promoter-binding-like protein 3 [Chenopodium quinoa]
miR156k	XR_002505691.1	3	NA	1	NA	XR_002505691.1	-	-	XP_021728480.1	2e-71	uncharacterized protein LOC110695573 [Chenopodium quinoa]
miR156k	XR_002505692.1	3	NA	1	NA	XR_002505692.1	-	-	XP_021728480.1	2e-71	uncharacterized protein LOC110695573 [Chenopodium quinoa]
miR156k	XR_002507799.1	3	NA	2.5	NA	XR_002507799.1	-	K00423|1|5.4e-21|105.9|egr:104451286|L-ascorbate oxidase [EC:1.10.3.3]!K05350|2|1.2e-07|61.6|nnu:104604855|beta-glucosidase [EC:3.2.1.21]!K10393|3|1.7e-06|57.8|nta:107828690|kinesin family member 2/24	XP_021737419.1	5.7e-210	putative F-box/LRR-repeat protein At4g15060 [Chenopodium quinoa]
miR156k	XR_002507800.1	3	NA	2.5	NA	XR_002507800.1	-	K00423|1|4.1e-21|105.9|egr:104451286|L-ascorbate oxidase [EC:1.10.3.3]!K05350|2|8.9e-08|61.6|nnu:104604855|beta-glucosidase [EC:3.2.1.21]	XP_021737419.1	2.1e-180	putative F-box/LRR-repeat protein At4g15060 [Chenopodium quinoa]
miR156k	XR_002511558.1	0	NA	0	NA	XR_002511558.1	-	K13415|1|1.2e-16|91.3|mdm:103401427|protein brassinosteroid insensitive 1 [EC:2.7.10.1 2.7.11.1]!K20641|2|1.3e-13|81.3|cvr:CHLNCDRAFT_59250|Rho GTPase-activating protein 20	XP_021757184.1	1.1e-302	squamosa promoter-binding-like protein 18 isoform X1 [Chenopodium quinoa]
miR157a-5p	XM_021857955.1	2	NA	1	NA	XM_021857955.1	-	K13415|1|2.1e-18|97.1|mdm:103401427|protein brassinosteroid insensitive 1 [EC:2.7.10.1 2.7.11.1]!K20641|2|4.6e-13|79.3|cvr:CHLNCDRAFT_59250|Rho GTPase-activating protein 20	XP_021713647.1	2.1e-205	squamosa promoter-binding-like protein 16 isoform X1 [Chenopodium quinoa]
miR157a-5p	XM_021857956.1	2	NA	1	NA	XM_021857956.1	-	K13415|1|2.1e-18|97.1|mdm:103401427|protein brassinosteroid insensitive 1 [EC:2.7.10.1 2.7.11.1]!K20641|2|4.6e-13|79.3|cvr:CHLNCDRAFT_59250|Rho GTPase-activating protein 20	XP_021713648.1	6.1e-205	squamosa promoter-binding-like protein 16 isoform X2 [Chenopodium quinoa]
miR157a-5p	XM_021862675.1	2.5	NA	1.2	NA	XM_021862675.1	-	K13415|1|2.2e-17|93.6|mdm:103401427|protein brassinosteroid insensitive 1 [EC:2.7.10.1 2.7.11.1]!K20641|2|1.6e-12|77.4|cvr:CHLNCDRAFT_59250|Rho GTPase-activating protein 20	XP_021718367.1	3e-246	squamosa promoter-binding-like protein 6 isoform X1 [Chenopodium quinoa]
miR157a-5p	XM_021862676.1	2.5	NA	1.2	NA	XM_021862676.1	-	K13415|1|2.3e-17|93.6|mdm:103401427|protein brassinosteroid insensitive 1 [EC:2.7.10.1 2.7.11.1]!K20641|2|1.7e-12|77.4|cvr:CHLNCDRAFT_59250|Rho GTPase-activating protein 20	XP_021718368.1	3.1e-238	squamosa promoter-binding-like protein 6 isoform X2 [Chenopodium quinoa]
miR157a-5p	XM_021867382.1	3	NA	1.5	NA	XM_021867382.1	GO:0005634,GO:0003677,GO:0046872,	K13415|1|8.7e-17|91.3|mdm:103401427|protein brassinosteroid insensitive 1 [EC:2.7.10.1 2.7.11.1]!K20641|2|2.1e-10|70.1|cvr:CHLNCDRAFT_59250|Rho GTPase-activating protein 20	XP_021723074.1	6.7e-233	squamosa promoter-binding-like protein 13A [Chenopodium quinoa]
miR157a-5p	XM_021867383.1	3	NA	1.5	NA	XM_021867383.1	GO:0005634,GO:0003677,GO:0046872,	K13415|1|9.5e-17|91.3|mdm:103401427|protein brassinosteroid insensitive 1 [EC:2.7.10.1 2.7.11.1]!K20641|2|2.3e-10|70.1|cvr:CHLNCDRAFT_59250|Rho GTPase-activating protein 20	XP_021723074.1	7.3e-233	squamosa promoter-binding-like protein 13A [Chenopodium quinoa]
miR157a-5p	XM_021867384.1	3	NA	1.5	NA	XM_021867384.1	GO:0005634,GO:0003677,GO:0046872,	K13415|1|8.1e-17|91.3|mdm:103401427|protein brassinosteroid insensitive 1 [EC:2.7.10.1 2.7.11.1]!K20641|2|1.9e-10|70.1|cvr:CHLNCDRAFT_59250|Rho GTPase-activating protein 20	XP_021723074.1	6.3e-233	squamosa promoter-binding-like protein 13A [Chenopodium quinoa]
miR157a-5p	XM_021867403.1	2	NA	1	NA	XM_021867403.1	-	K13415|1|1.3e-18|97.8|mdm:103401427|protein brassinosteroid insensitive 1 [EC:2.7.10.1 2.7.11.1]!K20641|2|1.9e-14|84.0|cvr:CHLNCDRAFT_59250|Rho GTPase-activating protein 20	XP_021723095.1	1.6e-269	squamosa promoter-binding-like protein 2 [Chenopodium quinoa]
miR157a-5p	XM_021867404.1	2	NA	1	NA	XM_021867404.1	-	K13415|1|1.9e-18|97.8|mdm:103401427|protein brassinosteroid insensitive 1 [EC:2.7.10.1 2.7.11.1]!K20641|2|2.8e-14|84.0|cvr:CHLNCDRAFT_59250|Rho GTPase-activating protein 20	XP_021723095.1	2.3e-269	squamosa promoter-binding-like protein 2 [Chenopodium quinoa]
miR157a-5p	XM_021868311.1	2	NA	1	NA	XM_021868311.1	-	K13415|1|3.5e-18|95.9|mdm:103401427|protein brassinosteroid insensitive 1 [EC:2.7.10.1 2.7.11.1]!K20641|2|1.8e-14|83.6|cvr:CHLNCDRAFT_59250|Rho GTPase-activating protein 20	XP_021724003.1	1.3e-223	squamosa promoter-binding-like protein 17 isoform X1 [Chenopodium quinoa]
miR157a-5p	XM_021868312.1	2	NA	1	NA	XM_021868312.1	-	K13415|1|3.4e-18|95.9|mdm:103401427|protein brassinosteroid insensitive 1 [EC:2.7.10.1 2.7.11.1]!K20641|2|1.8e-14|83.6|cvr:CHLNCDRAFT_59250|Rho GTPase-activating protein 20	XP_021724004.1	3.6e-215	squamosa promoter-binding-like protein 17 isoform X2 [Chenopodium quinoa]
miR157a-5p	XM_021870788.1	1	NA	0.5	NA	XM_021870788.1	-	K13415|1|5.3e-17|91.3|mdm:103401427|protein brassinosteroid insensitive 1 [EC:2.7.10.1 2.7.11.1]!K20641|2|1.0e-07|60.5|cvr:CHLNCDRAFT_59250|Rho GTPase-activating protein 20	XP_021726480.1	7.3e-73	squamosa promoter-binding protein 1-like isoform X1 [Chenopodium quinoa]
miR157a-5p	XM_021870789.1	1	NA	0.5	NA	XM_021870789.1	-	K13415|1|5.4e-21|104.4|mdm:103401427|protein brassinosteroid insensitive 1 [EC:2.7.10.1 2.7.11.1]!K20641|2|1.0e-11|73.6|cvr:CHLNCDRAFT_59250|Rho GTPase-activating protein 20	XP_021726481.1	5e-57	squamosa promoter-binding protein 1-like isoform X2 [Chenopodium quinoa]
miR157a-5p	XM_021871804.1	2	NA	1	NA	XM_021871804.1	-	K13415|1|3.0e-18|96.7|mdm:103401427|protein brassinosteroid insensitive 1 [EC:2.7.10.1 2.7.11.1]!K20641|2|2.3e-13|80.5|cvr:CHLNCDRAFT_59250|Rho GTPase-activating protein 20	XP_021727496.1	2.5e-204	squamosa promoter-binding-like protein 16 [Chenopodium quinoa]
miR157a-5p	XM_021875189.1	3	NA	1.5	NA	XM_021875189.1	-	K13415|1|1.6e-16|91.3|mdm:103401427|protein brassinosteroid insensitive 1 [EC:2.7.10.1 2.7.11.1]!K20641|2|3.3e-14|83.6|cvr:CHLNCDRAFT_59250|Rho GTPase-activating protein 20	XP_021730881.1	0	squamosa promoter-binding-like protein 18 isoform X1 [Chenopodium quinoa]
miR157a-5p	XM_021875197.1	3	NA	1.5	NA	XM_021875197.1	-	K13415|1|1.5e-16|91.3|mdm:103401427|protein brassinosteroid insensitive 1 [EC:2.7.10.1 2.7.11.1]!K20641|2|3.2e-14|83.6|cvr:CHLNCDRAFT_59250|Rho GTPase-activating protein 20	XP_021730889.1	0	squamosa promoter-binding-like protein 18 isoform X2 [Chenopodium quinoa]
miR157a-5p	XM_021875206.1	3	NA	1.5	NA	XM_021875206.1	-	K13415|1|1.3e-16|91.3|mdm:103401427|protein brassinosteroid insensitive 1 [EC:2.7.10.1 2.7.11.1]!K20641|2|2.6e-14|83.6|cvr:CHLNCDRAFT_59250|Rho GTPase-activating protein 20	XP_021730881.1	4.8e-272	squamosa promoter-binding-like protein 18 isoform X1 [Chenopodium quinoa]
miR157a-5p	XM_021881727.1	2.5	NA	1.5	NA	XM_021881727.1	-	K00423|1|4.1e-21|105.9|egr:104451286|L-ascorbate oxidase [EC:1.10.3.3]!K05350|2|8.9e-08|61.6|nnu:104604855|beta-glucosidase [EC:3.2.1.21]	XP_021737419.1	4.3e-218	putative F-box/LRR-repeat protein At4g15060 [Chenopodium quinoa]
miR157a-5p	XM_021881728.1	2.5	NA	1.5	NA	XM_021881728.1	-	K00423|1|4.1e-21|105.9|egr:104451286|L-ascorbate oxidase [EC:1.10.3.3]!K05350|2|8.9e-08|61.6|nnu:104604855|beta-glucosidase [EC:3.2.1.21]	XP_021737419.1	4.3e-218	putative F-box/LRR-repeat protein At4g15060 [Chenopodium quinoa]
miR157a-5p	XM_021884935.1	1	NA	0.5	NA	XM_021884935.1	-	K13415|1|3.6e-16|88.6|mdm:103401427|protein brassinosteroid insensitive 1 [EC:2.7.10.1 2.7.11.1]!K20641|2|4.0e-07|58.5|cvr:CHLNCDRAFT_59250|Rho GTPase-activating protein 20	XP_021740627.1	2.4e-71	squamosa promoter-binding protein 1-like [Chenopodium quinoa]
miR157a-5p	XM_021889412.1	2	NA	1	NA	XM_021889412.1	-	K13415|1|1.0e-18|98.2|mdm:103401427|protein brassinosteroid insensitive 1 [EC:2.7.10.1 2.7.11.1]!K20641|2|9.0e-15|85.1|cvr:CHLNCDRAFT_59250|Rho GTPase-activating protein 20	XP_021745104.1	6.4e-269	squamosa promoter-binding-like protein 2 [Chenopodium quinoa]
miR157a-5p	XM_021889421.1	2	NA	1	NA	XM_021889421.1	-	K13415|1|1.3e-18|98.2|mdm:103401427|protein brassinosteroid insensitive 1 [EC:2.7.10.1 2.7.11.1]!K20641|2|1.2e-14|85.1|cvr:CHLNCDRAFT_59250|Rho GTPase-activating protein 20	XP_021745104.1	8.4e-269	squamosa promoter-binding-like protein 2 [Chenopodium quinoa]
miR157a-5p	XM_021889619.1	3	NA	1.5	NA	XM_021889619.1	GO:0005634,GO:0003677,GO:0046872,	K13415|1|4.8e-16|89.4|mdm:103401427|protein brassinosteroid insensitive 1 [EC:2.7.10.1 2.7.11.1]!K20641|2|5.1e-10|69.3|cvr:CHLNCDRAFT_59250|Rho GTPase-activating protein 20	XP_021745311.1	9e-255	squamosa promoter-binding-like protein 13A [Chenopodium quinoa]
miR157a-5p	XM_021900841.1	2.5	NA	1.2	NA	XM_021900841.1	-	K13415|1|5.2e-16|89.0|mdm:103401427|protein brassinosteroid insensitive 1 [EC:2.7.10.1 2.7.11.1]!K20641|2|1.2e-12|77.8|cvr:CHLNCDRAFT_59250|Rho GTPase-activating protein 20	XP_021756533.1	2.9e-246	squamosa promoter-binding-like protein 6 [Chenopodium quinoa]
miR157a-5p	XM_021901492.1	3	NA	1.5	NA	XM_021901492.1	-	K13415|1|1.3e-16|91.3|mdm:103401427|protein brassinosteroid insensitive 1 [EC:2.7.10.1 2.7.11.1]!K20641|2|1.3e-13|81.3|cvr:CHLNCDRAFT_59250|Rho GTPase-activating protein 20	XP_021757184.1	0	squamosa promoter-binding-like protein 18 isoform X1 [Chenopodium quinoa]
miR157a-5p	XM_021901493.1	3	NA	1.5	NA	XM_021901493.1	-	K13415|1|1.4e-16|91.3|mdm:103401427|protein brassinosteroid insensitive 1 [EC:2.7.10.1 2.7.11.1]!K20641|2|1.4e-13|81.3|cvr:CHLNCDRAFT_59250|Rho GTPase-activating protein 20	XP_021757184.1	0	squamosa promoter-binding-like protein 18 isoform X1 [Chenopodium quinoa]
miR157a-5p	XM_021901494.1	3	NA	1.5	NA	XM_021901494.1	-	K13415|1|1.2e-16|91.3|mdm:103401427|protein brassinosteroid insensitive 1 [EC:2.7.10.1 2.7.11.1]!K20641|2|1.2e-13|81.3|cvr:CHLNCDRAFT_59250|Rho GTPase-activating protein 20	XP_021757186.1	3.4e-304	teosinte glume architecture 1-like isoform X3 [Chenopodium quinoa]
miR157a-5p	XM_021907686.1	3	NA	2	NA	XM_021907686.1	GO:0016788,	K00679|1|3.6e-49|198.7|cic:CICLE_v10027727mg|phospholipid:diacylglycerol acyltransferase [EC:2.3.1.158]!K10691|2|2.3e-43|179.5|ats:109762802|E3 ubiquitin-protein ligase UBR4 [EC:2.3.2.27]!K14209|3|1.2e-36|157.1|ats:109773794|solute carrier family 36 (proton-coupled amino acid transporter)!K01188|4|5.4e-29|131.7|aly:ARALYDRAFT_316517|beta-glucosidase [EC:3.2.1.21]!K01206|5|1.0e-19|100.9|bna:106392…	XP_021763378.1	2.4e-216	GDSL esterase/lipase At4g28780-like [Chenopodium quinoa]
miR157a-5p	XM_021908323.1	3.5	NA	2	NA	XM_021908323.1	-	K18195|1|1.0e-23|113.6|thj:104807150|rhamnogalacturonan endolyase [EC:4.2.2.23]!K22804|2|1.8e-15|86.3|bna:106442438|structural maintenance of chromosomes protein 6!K02641|3|5.7e-14|81.3|jre:108997663|ferredoxin--NADP+ reductase [EC:1.18.1.2]!K14297|4|1.5e-06|56.6|nsy:104215433|nuclear pore complex protein Nup98-Nup96	XP_021764015.1	1.3e-202	uncharacterized protein LOC110728681 [Chenopodium quinoa]
miR157a-5p	XM_021914710.1	2	NA	1	NA	XM_021914710.1	-	K13415|1|4.6e-18|95.9|mdm:103401427|protein brassinosteroid insensitive 1 [EC:2.7.10.1 2.7.11.1]!K20641|2|2.4e-14|83.6|cvr:CHLNCDRAFT_59250|Rho GTPase-activating protein 20	XP_021770402.1	8.2e-223	squamosa promoter-binding-like protein 17 [Chenopodium quinoa]
miR157a-5p	XR_002507799.1	2.5	NA	1.5	NA	XR_002507799.1	-	K00423|1|5.4e-21|105.9|egr:104451286|L-ascorbate oxidase [EC:1.10.3.3]!K05350|2|1.2e-07|61.6|nnu:104604855|beta-glucosidase [EC:3.2.1.21]!K10393|3|1.7e-06|57.8|nta:107828690|kinesin family member 2/24	XP_021737419.1	5.7e-210	putative F-box/LRR-repeat protein At4g15060 [Chenopodium quinoa]
miR157a-5p	XR_002507800.1	2.5	NA	1.5	NA	XR_002507800.1	-	K00423|1|4.1e-21|105.9|egr:104451286|L-ascorbate oxidase [EC:1.10.3.3]!K05350|2|8.9e-08|61.6|nnu:104604855|beta-glucosidase [EC:3.2.1.21]	XP_021737419.1	2.1e-180	putative F-box/LRR-repeat protein At4g15060 [Chenopodium quinoa]
miR157a-5p	XR_002507830.1	3	NA	1.5	NA	XR_002507830.1	-	-	-	-	-
miR157a-5p	XR_002508412.1	1	NA	0.5	NA	XR_002508412.1	-	K13415|1|1.5e-08|62.8|mdm:103401427|protein brassinosteroid insensitive 1 [EC:2.7.10.1 2.7.11.1]	XP_021740627.1	3.8e-34	squamosa promoter-binding protein 1-like [Chenopodium quinoa]
miR157a-5p	XR_002511558.1	3	NA	1.5	NA	XR_002511558.1	-	K13415|1|1.2e-16|91.3|mdm:103401427|protein brassinosteroid insensitive 1 [EC:2.7.10.1 2.7.11.1]!K20641|2|1.3e-13|81.3|cvr:CHLNCDRAFT_59250|Rho GTPase-activating protein 20	XP_021757184.1	1.1e-302	squamosa promoter-binding-like protein 18 isoform X1 [Chenopodium quinoa]
miR157d	XM_021857955.1	2	NA	1	NA	XM_021857955.1	-	K13415|1|2.1e-18|97.1|mdm:103401427|protein brassinosteroid insensitive 1 [EC:2.7.10.1 2.7.11.1]!K20641|2|4.6e-13|79.3|cvr:CHLNCDRAFT_59250|Rho GTPase-activating protein 20	XP_021713647.1	2.1e-205	squamosa promoter-binding-like protein 16 isoform X1 [Chenopodium quinoa]
miR157d	XM_021857956.1	2	NA	1	NA	XM_021857956.1	-	K13415|1|2.1e-18|97.1|mdm:103401427|protein brassinosteroid insensitive 1 [EC:2.7.10.1 2.7.11.1]!K20641|2|4.6e-13|79.3|cvr:CHLNCDRAFT_59250|Rho GTPase-activating protein 20	XP_021713648.1	6.1e-205	squamosa promoter-binding-like protein 16 isoform X2 [Chenopodium quinoa]
miR157d	XM_021862675.1	2	NA	1	NA	XM_021862675.1	-	K13415|1|2.2e-17|93.6|mdm:103401427|protein brassinosteroid insensitive 1 [EC:2.7.10.1 2.7.11.1]!K20641|2|1.6e-12|77.4|cvr:CHLNCDRAFT_59250|Rho GTPase-activating protein 20	XP_021718367.1	3e-246	squamosa promoter-binding-like protein 6 isoform X1 [Chenopodium quinoa]
miR157d	XM_021862676.1	2	NA	1	NA	XM_021862676.1	-	K13415|1|2.3e-17|93.6|mdm:103401427|protein brassinosteroid insensitive 1 [EC:2.7.10.1 2.7.11.1]!K20641|2|1.7e-12|77.4|cvr:CHLNCDRAFT_59250|Rho GTPase-activating protein 20	XP_021718368.1	3.1e-238	squamosa promoter-binding-like protein 6 isoform X2 [Chenopodium quinoa]
miR157d	XM_021867382.1	2	NA	1	NA	XM_021867382.1	GO:0005634,GO:0003677,GO:0046872,	K13415|1|8.7e-17|91.3|mdm:103401427|protein brassinosteroid insensitive 1 [EC:2.7.10.1 2.7.11.1]!K20641|2|2.1e-10|70.1|cvr:CHLNCDRAFT_59250|Rho GTPase-activating protein 20	XP_021723074.1	6.7e-233	squamosa promoter-binding-like protein 13A [Chenopodium quinoa]
miR157d	XM_021867383.1	2	NA	1	NA	XM_021867383.1	GO:0005634,GO:0003677,GO:0046872,	K13415|1|9.5e-17|91.3|mdm:103401427|protein brassinosteroid insensitive 1 [EC:2.7.10.1 2.7.11.1]!K20641|2|2.3e-10|70.1|cvr:CHLNCDRAFT_59250|Rho GTPase-activating protein 20	XP_021723074.1	7.3e-233	squamosa promoter-binding-like protein 13A [Chenopodium quinoa]
miR157d	XM_021867384.1	2	NA	1	NA	XM_021867384.1	GO:0005634,GO:0003677,GO:0046872,	K13415|1|8.1e-17|91.3|mdm:103401427|protein brassinosteroid insensitive 1 [EC:2.7.10.1 2.7.11.1]!K20641|2|1.9e-10|70.1|cvr:CHLNCDRAFT_59250|Rho GTPase-activating protein 20	XP_021723074.1	6.3e-233	squamosa promoter-binding-like protein 13A [Chenopodium quinoa]
miR157d	XM_021867403.1	2	NA	1	NA	XM_021867403.1	-	K13415|1|1.3e-18|97.8|mdm:103401427|protein brassinosteroid insensitive 1 [EC:2.7.10.1 2.7.11.1]!K20641|2|1.9e-14|84.0|cvr:CHLNCDRAFT_59250|Rho GTPase-activating protein 20	XP_021723095.1	1.6e-269	squamosa promoter-binding-like protein 2 [Chenopodium quinoa]
miR157d	XM_021867404.1	2	NA	1	NA	XM_021867404.1	-	K13415|1|1.9e-18|97.8|mdm:103401427|protein brassinosteroid insensitive 1 [EC:2.7.10.1 2.7.11.1]!K20641|2|2.8e-14|84.0|cvr:CHLNCDRAFT_59250|Rho GTPase-activating protein 20	XP_021723095.1	2.3e-269	squamosa promoter-binding-like protein 2 [Chenopodium quinoa]
miR157d	XM_021868311.1	2	NA	1	NA	XM_021868311.1	-	K13415|1|3.5e-18|95.9|mdm:103401427|protein brassinosteroid insensitive 1 [EC:2.7.10.1 2.7.11.1]!K20641|2|1.8e-14|83.6|cvr:CHLNCDRAFT_59250|Rho GTPase-activating protein 20	XP_021724003.1	1.3e-223	squamosa promoter-binding-like protein 17 isoform X1 [Chenopodium quinoa]
miR157d	XM_021868312.1	2	NA	1	NA	XM_021868312.1	-	K13415|1|3.4e-18|95.9|mdm:103401427|protein brassinosteroid insensitive 1 [EC:2.7.10.1 2.7.11.1]!K20641|2|1.8e-14|83.6|cvr:CHLNCDRAFT_59250|Rho GTPase-activating protein 20	XP_021724004.1	3.6e-215	squamosa promoter-binding-like protein 17 isoform X2 [Chenopodium quinoa]
miR157d	XM_021870788.1	1	NA	0.5	NA	XM_021870788.1	-	K13415|1|5.3e-17|91.3|mdm:103401427|protein brassinosteroid insensitive 1 [EC:2.7.10.1 2.7.11.1]!K20641|2|1.0e-07|60.5|cvr:CHLNCDRAFT_59250|Rho GTPase-activating protein 20	XP_021726480.1	7.3e-73	squamosa promoter-binding protein 1-like isoform X1 [Chenopodium quinoa]
miR157d	XM_021870789.1	1	NA	0.5	NA	XM_021870789.1	-	K13415|1|5.4e-21|104.4|mdm:103401427|protein brassinosteroid insensitive 1 [EC:2.7.10.1 2.7.11.1]!K20641|2|1.0e-11|73.6|cvr:CHLNCDRAFT_59250|Rho GTPase-activating protein 20	XP_021726481.1	5e-57	squamosa promoter-binding protein 1-like isoform X2 [Chenopodium quinoa]
miR157d	XM_021871804.1	2	NA	1	NA	XM_021871804.1	-	K13415|1|3.0e-18|96.7|mdm:103401427|protein brassinosteroid insensitive 1 [EC:2.7.10.1 2.7.11.1]!K20641|2|2.3e-13|80.5|cvr:CHLNCDRAFT_59250|Rho GTPase-activating protein 20	XP_021727496.1	2.5e-204	squamosa promoter-binding-like protein 16 [Chenopodium quinoa]
miR157d	XM_021875189.1	2	NA	1	NA	XM_021875189.1	-	K13415|1|1.6e-16|91.3|mdm:103401427|protein brassinosteroid insensitive 1 [EC:2.7.10.1 2.7.11.1]!K20641|2|3.3e-14|83.6|cvr:CHLNCDRAFT_59250|Rho GTPase-activating protein 20	XP_021730881.1	0	squamosa promoter-binding-like protein 18 isoform X1 [Chenopodium quinoa]
miR157d	XM_021875197.1	2	NA	1	NA	XM_021875197.1	-	K13415|1|1.5e-16|91.3|mdm:103401427|protein brassinosteroid insensitive 1 [EC:2.7.10.1 2.7.11.1]!K20641|2|3.2e-14|83.6|cvr:CHLNCDRAFT_59250|Rho GTPase-activating protein 20	XP_021730889.1	0	squamosa promoter-binding-like protein 18 isoform X2 [Chenopodium quinoa]
miR157d	XM_021875206.1	2	NA	1	NA	XM_021875206.1	-	K13415|1|1.3e-16|91.3|mdm:103401427|protein brassinosteroid insensitive 1 [EC:2.7.10.1 2.7.11.1]!K20641|2|2.6e-14|83.6|cvr:CHLNCDRAFT_59250|Rho GTPase-activating protein 20	XP_021730881.1	4.8e-272	squamosa promoter-binding-like protein 18 isoform X1 [Chenopodium quinoa]
miR157d	XM_021881727.1	2	NA	2	NA	XM_021881727.1	-	K00423|1|4.1e-21|105.9|egr:104451286|L-ascorbate oxidase [EC:1.10.3.3]!K05350|2|8.9e-08|61.6|nnu:104604855|beta-glucosidase [EC:3.2.1.21]	XP_021737419.1	4.3e-218	putative F-box/LRR-repeat protein At4g15060 [Chenopodium quinoa]
miR157d	XM_021881728.1	2	NA	2	NA	XM_021881728.1	-	K00423|1|4.1e-21|105.9|egr:104451286|L-ascorbate oxidase [EC:1.10.3.3]!K05350|2|8.9e-08|61.6|nnu:104604855|beta-glucosidase [EC:3.2.1.21]	XP_021737419.1	4.3e-218	putative F-box/LRR-repeat protein At4g15060 [Chenopodium quinoa]
miR157d	XM_021884935.1	1	NA	0.5	NA	XM_021884935.1	-	K13415|1|3.6e-16|88.6|mdm:103401427|protein brassinosteroid insensitive 1 [EC:2.7.10.1 2.7.11.1]!K20641|2|4.0e-07|58.5|cvr:CHLNCDRAFT_59250|Rho GTPase-activating protein 20	XP_021740627.1	2.4e-71	squamosa promoter-binding protein 1-like [Chenopodium quinoa]
miR157d	XM_021889412.1	2	NA	1	NA	XM_021889412.1	-	K13415|1|1.0e-18|98.2|mdm:103401427|protein brassinosteroid insensitive 1 [EC:2.7.10.1 2.7.11.1]!K20641|2|9.0e-15|85.1|cvr:CHLNCDRAFT_59250|Rho GTPase-activating protein 20	XP_021745104.1	6.4e-269	squamosa promoter-binding-like protein 2 [Chenopodium quinoa]
miR157d	XM_021889421.1	2	NA	1	NA	XM_021889421.1	-	K13415|1|1.3e-18|98.2|mdm:103401427|protein brassinosteroid insensitive 1 [EC:2.7.10.1 2.7.11.1]!K20641|2|1.2e-14|85.1|cvr:CHLNCDRAFT_59250|Rho GTPase-activating protein 20	XP_021745104.1	8.4e-269	squamosa promoter-binding-like protein 2 [Chenopodium quinoa]
miR157d	XM_021889619.1	2	NA	1	NA	XM_021889619.1	GO:0005634,GO:0003677,GO:0046872,	K13415|1|4.8e-16|89.4|mdm:103401427|protein brassinosteroid insensitive 1 [EC:2.7.10.1 2.7.11.1]!K20641|2|5.1e-10|69.3|cvr:CHLNCDRAFT_59250|Rho GTPase-activating protein 20	XP_021745311.1	9e-255	squamosa promoter-binding-like protein 13A [Chenopodium quinoa]
miR157d	XM_021900841.1	2	NA	1	NA	XM_021900841.1	-	K13415|1|5.2e-16|89.0|mdm:103401427|protein brassinosteroid insensitive 1 [EC:2.7.10.1 2.7.11.1]!K20641|2|1.2e-12|77.8|cvr:CHLNCDRAFT_59250|Rho GTPase-activating protein 20	XP_021756533.1	2.9e-246	squamosa promoter-binding-like protein 6 [Chenopodium quinoa]
miR157d	XM_021901492.1	2	NA	1	NA	XM_021901492.1	-	K13415|1|1.3e-16|91.3|mdm:103401427|protein brassinosteroid insensitive 1 [EC:2.7.10.1 2.7.11.1]!K20641|2|1.3e-13|81.3|cvr:CHLNCDRAFT_59250|Rho GTPase-activating protein 20	XP_021757184.1	0	squamosa promoter-binding-like protein 18 isoform X1 [Chenopodium quinoa]
miR157d	XM_021901493.1	2	NA	1	NA	XM_021901493.1	-	K13415|1|1.4e-16|91.3|mdm:103401427|protein brassinosteroid insensitive 1 [EC:2.7.10.1 2.7.11.1]!K20641|2|1.4e-13|81.3|cvr:CHLNCDRAFT_59250|Rho GTPase-activating protein 20	XP_021757184.1	0	squamosa promoter-binding-like protein 18 isoform X1 [Chenopodium quinoa]
miR157d	XM_021901494.1	2	NA	1	NA	XM_021901494.1	-	K13415|1|1.2e-16|91.3|mdm:103401427|protein brassinosteroid insensitive 1 [EC:2.7.10.1 2.7.11.1]!K20641|2|1.2e-13|81.3|cvr:CHLNCDRAFT_59250|Rho GTPase-activating protein 20	XP_021757186.1	3.4e-304	teosinte glume architecture 1-like isoform X3 [Chenopodium quinoa]
miR157d	XM_021907686.1	3	NA	2	NA	XM_021907686.1	GO:0016788,	K00679|1|3.6e-49|198.7|cic:CICLE_v10027727mg|phospholipid:diacylglycerol acyltransferase [EC:2.3.1.158]!K10691|2|2.3e-43|179.5|ats:109762802|E3 ubiquitin-protein ligase UBR4 [EC:2.3.2.27]!K14209|3|1.2e-36|157.1|ats:109773794|solute carrier family 36 (proton-coupled amino acid transporter)!K01188|4|5.4e-29|131.7|aly:ARALYDRAFT_316517|beta-glucosidase [EC:3.2.1.21]!K01206|5|1.0e-19|100.9|bna:106392…	XP_021763378.1	2.4e-216	GDSL esterase/lipase At4g28780-like [Chenopodium quinoa]
miR157d	XM_021908323.1	3.5	NA	1.8	NA	XM_021908323.1	-	K18195|1|1.0e-23|113.6|thj:104807150|rhamnogalacturonan endolyase [EC:4.2.2.23]!K22804|2|1.8e-15|86.3|bna:106442438|structural maintenance of chromosomes protein 6!K02641|3|5.7e-14|81.3|jre:108997663|ferredoxin--NADP+ reductase [EC:1.18.1.2]!K14297|4|1.5e-06|56.6|nsy:104215433|nuclear pore complex protein Nup98-Nup96	XP_021764015.1	1.3e-202	uncharacterized protein LOC110728681 [Chenopodium quinoa]
miR157d	XM_021914710.1	2	NA	1	NA	XM_021914710.1	-	K13415|1|4.6e-18|95.9|mdm:103401427|protein brassinosteroid insensitive 1 [EC:2.7.10.1 2.7.11.1]!K20641|2|2.4e-14|83.6|cvr:CHLNCDRAFT_59250|Rho GTPase-activating protein 20	XP_021770402.1	8.2e-223	squamosa promoter-binding-like protein 17 [Chenopodium quinoa]
miR157d	XR_002507799.1	2	NA	2	NA	XR_002507799.1	-	K00423|1|5.4e-21|105.9|egr:104451286|L-ascorbate oxidase [EC:1.10.3.3]!K05350|2|1.2e-07|61.6|nnu:104604855|beta-glucosidase [EC:3.2.1.21]!K10393|3|1.7e-06|57.8|nta:107828690|kinesin family member 2/24	XP_021737419.1	5.7e-210	putative F-box/LRR-repeat protein At4g15060 [Chenopodium quinoa]
miR157d	XR_002507800.1	2	NA	2	NA	XR_002507800.1	-	K00423|1|4.1e-21|105.9|egr:104451286|L-ascorbate oxidase [EC:1.10.3.3]!K05350|2|8.9e-08|61.6|nnu:104604855|beta-glucosidase [EC:3.2.1.21]	XP_021737419.1	2.1e-180	putative F-box/LRR-repeat protein At4g15060 [Chenopodium quinoa]
miR157d	XR_002507830.1	2	NA	1	NA	XR_002507830.1	-	-	-	-	-
miR157d	XR_002508412.1	1	NA	0.5	NA	XR_002508412.1	-	K13415|1|1.5e-08|62.8|mdm:103401427|protein brassinosteroid insensitive 1 [EC:2.7.10.1 2.7.11.1]	XP_021740627.1	3.8e-34	squamosa promoter-binding protein 1-like [Chenopodium quinoa]
miR157d	XR_002511558.1	2	NA	1	NA	XR_002511558.1	-	K13415|1|1.2e-16|91.3|mdm:103401427|protein brassinosteroid insensitive 1 [EC:2.7.10.1 2.7.11.1]!K20641|2|1.3e-13|81.3|cvr:CHLNCDRAFT_59250|Rho GTPase-activating protein 20	XP_021757184.1	1.1e-302	squamosa promoter-binding-like protein 18 isoform X1 [Chenopodium quinoa]
miR159a-5p_5	XM_021897230.1	3.5	NA	1.8	NA	XM_021897230.1	-	K01190|1|0.0e+00|2168.7|soe:110798721|beta-galactosidase [EC:3.2.1.23]	XP_021752922.1	0	uncharacterized protein LOC110718394 [Chenopodium quinoa]
miR159a-5p_5	XM_021918767.1	3.5	NA	1.8	NA	XM_021918767.1	-	K01190|1|0.0e+00|2172.5|soe:110798721|beta-galactosidase [EC:3.2.1.23]	XP_021774459.1	0	uncharacterized protein LOC110738385 [Chenopodium quinoa]
miR159a_1	XM_021872930.1	3.5	NA	1	NA	XM_021872930.1	-	-	XP_021728622.1	1.7e-226	uncharacterized protein LOC110695702 [Chenopodium quinoa]
miR159a_1	XM_021878602.1	3.5	NA	1.8	NA	XM_021878602.1	-	K09422|1|0.0e+00|1132.5|cqi:110701023|transcription factor MYB, plant	XP_021734294.1	0	transcription factor GAMYB-like [Chenopodium quinoa]
miR159a_1	XM_021878603.1	3.5	NA	1.8	NA	XM_021878603.1	-	K09422|1|0.0e+00|1132.5|cqi:110701023|transcription factor MYB, plant	XP_021734294.1	0	transcription factor GAMYB-like [Chenopodium quinoa]
miR159a_1	XM_021878604.1	3.5	NA	1.8	NA	XM_021878604.1	-	K09422|1|0.0e+00|1132.5|cqi:110701023|transcription factor MYB, plant	XP_021734294.1	0	transcription factor GAMYB-like [Chenopodium quinoa]
miR159a_1	XM_021887444.1	3.5	NA	2.2	NA	XM_021887444.1	-	K19475|1|9.9e-43|177.9|sind:105165428|WAS/WASL-interacting protein	XP_021743136.1	5e-258	uncharacterized protein LOC110709232 [Chenopodium quinoa]
miR159a_1	XM_021893191.1	3.5	NA	1.8	NA	XM_021893191.1	-	K09422|1|7.2e-206|720.3|cqi:110714640|transcription factor MYB, plant	XP_021748883.1	3.8e-205	transcription factor DUO1-like isoform X1 [Chenopodium quinoa]
miR159a_1	XM_021893192.1	3.5	NA	1.8	NA	XM_021893192.1	-	K09422|1|5.3e-98|362.1|cqi:110714640|transcription factor MYB, plant	XP_021748884.1	2.3e-99	transcription factor DUO1-like isoform X2 [Chenopodium quinoa]
miR159a_1	XM_021900046.1	3	NA	1.5	NA	XM_021900046.1	GO:0003677,	K09422|1|1.2e-264|914.8|cqi:110720946|transcription factor MYB, plant	XP_021755738.1	6.5e-264	transcription factor MYB97-like [Chenopodium quinoa]
miR159a_1	XM_021900414.1	3.5	NA	1.8	NA	XM_021900414.1	-	K09422|1|1.7e-210|735.3|cqi:110721273|transcription factor MYB, plant	XP_021756106.1	9.2e-210	transcription factor DUO1-like [Chenopodium quinoa]
miR159a_1	XM_021901810.1	3	NA	1.5	NA	XM_021901810.1	-	K09422|1|2.7e-194|680.2|cqi:110722544|transcription factor MYB, plant	XP_021757502.1	1.5e-193	transcription factor DUO1-like [Chenopodium quinoa]
miR159a_1	XM_021902085.1	3.5	NA	2.5	NA	XM_021902085.1	-	K19892|1|4.9e-69|265.0|brp:103870118|glucan endo-1,3-beta-glucosidase 4 [EC:3.2.1.39]!K19891|5|2.7e-67|259.2|eus:EUTSA_v10004013mg|glucan endo-1,3-beta-glucosidase 1/2/3 [EC:3.2.1.39]	XP_021757777.1	5.5e-252	glucan endo-1,3-beta-glucosidase 11-like [Chenopodium quinoa]
miR159a_1	XM_021912142.1	3	NA	1.5	NA	XM_021912142.1	-	K09422|1|1.1e-125|453.4|cqi:110722544|transcription factor MYB, plant	XP_021757502.1	5.8e-125	transcription factor DUO1-like [Chenopodium quinoa]
miR159a_1	XM_021916555.1	3.5	NA	1.8	NA	XM_021916555.1	-	K09422|1|0.0e+00|1144.8|cqi:110736354|transcription factor MYB, plant	XP_021772247.1	0	transcription factor GAMYB-like [Chenopodium quinoa]
miR159a_1	XM_021916556.1	3.5	NA	1.8	NA	XM_021916556.1	-	K09422|1|0.0e+00|1144.8|cqi:110736354|transcription factor MYB, plant	XP_021772247.1	0	transcription factor GAMYB-like [Chenopodium quinoa]
miR159a_1	XM_021918124.1	3.5	NA	2.2	NA	XM_021918124.1	-	K19475|1|7.4e-41|171.8|sind:105165428|WAS/WASL-interacting protein	XP_021773816.1	3.4e-241	uncharacterized protein LOC110737776 [Chenopodium quinoa]
miR159a_1	XR_002504048.1	1.5	NA	1	NA	XR_002504048.1	-	-	XP_021768909.1	1.9e-38	uncharacterized protein LOC110733208 isoform X1 [Chenopodium quinoa]
miR159a_1	XR_002504049.1	1.5	NA	1	NA	XR_002504049.1	-	-	XP_021768909.1	5.5e-39	uncharacterized protein LOC110733208 isoform X1 [Chenopodium quinoa]
miR159b-3p	XM_021872930.1	2.5	NA	1.5	NA	XM_021872930.1	-	-	XP_021728622.1	1.7e-226	uncharacterized protein LOC110695702 [Chenopodium quinoa]
miR159b-3p	XM_021905618.1	3.5	NA	2.2	NA	XM_021905618.1	-	-	XP_021761310.1	0	uncharacterized protein LOC110726153 [Chenopodium quinoa]
miR159b-3p	XM_021913218.1	3	NA	2	NA	XM_021913218.1	-	K08597|1|1.5e-06|58.2|bvg:104887063|sentrin-specific protease 8 [EC:3.4.22.68]	XP_021768909.1	0	uncharacterized protein LOC110733208 isoform X1 [Chenopodium quinoa]
miR159b-3p	XM_021914082.1	3	NA	1.8	NA	XM_021914082.1	-	K08597|1|1.3e-08|64.3|bvg:104887063|sentrin-specific protease 8 [EC:3.4.22.68]	XP_021768910.1	1.7e-227	uncharacterized protein LOC110733208 isoform X2 [Chenopodium quinoa]
miR159b-3p	XR_002504048.1	2.5	NA	2.5	NA	XR_002504048.1	-	-	XP_021768909.1	1.9e-38	uncharacterized protein LOC110733208 isoform X1 [Chenopodium quinoa]
miR159b-3p	XR_002504049.1	2.5	NA	2.5	NA	XR_002504049.1	-	-	XP_021768909.1	5.5e-39	uncharacterized protein LOC110733208 isoform X1 [Chenopodium quinoa]
miR159c_6	XM_021872930.1	3.5	NA	1.5	NA	XM_021872930.1	-	-	XP_021728622.1	1.7e-226	uncharacterized protein LOC110695702 [Chenopodium quinoa]
miR159c_6	XM_021887458.1	3.5	NA	2.2	NA	XM_021887458.1	GO:0016021,GO:0051753,GO:0009294,GO:0009617,	K13680|1|4.9e-271|936.4|vvi:100259738|beta-mannan synthase [EC:2.4.1.32]	XP_002283672.1	2.6e-270	PREDICTED: glucomannan 4-beta-mannosyltransferase 9 [Vitis vinifera]
miR159c_6	XM_021901810.1	3.5	NA	1.8	NA	XM_021901810.1	-	K09422|1|2.7e-194|680.2|cqi:110722544|transcription factor MYB, plant	XP_021757502.1	1.5e-193	transcription factor DUO1-like [Chenopodium quinoa]
miR159c_6	XM_021912142.1	3.5	NA	1.8	NA	XM_021912142.1	-	K09422|1|1.1e-125|453.4|cqi:110722544|transcription factor MYB, plant	XP_021757502.1	5.8e-125	transcription factor DUO1-like [Chenopodium quinoa]
miR159c_6	XM_021914082.1	2.5	NA	1.5	NA	XM_021914082.1	-	K08597|1|1.3e-08|64.3|bvg:104887063|sentrin-specific protease 8 [EC:3.4.22.68]	XP_021768910.1	1.7e-227	uncharacterized protein LOC110733208 isoform X2 [Chenopodium quinoa]
miR159c_6	XR_002504048.1	2.5	NA	1.5	NA	XR_002504048.1	-	-	XP_021768909.1	1.9e-38	uncharacterized protein LOC110733208 isoform X1 [Chenopodium quinoa]
miR159c_6	XR_002504049.1	2.5	NA	1.5	NA	XR_002504049.1	-	-	XP_021768909.1	5.5e-39	uncharacterized protein LOC110733208 isoform X1 [Chenopodium quinoa]
miR160	XM_021865744.1	3	NA	2.5	NA	XM_021865744.1	-	-	XP_021721436.1	1.1e-215	UPF0496 protein At3g19330-like isoform X1 [Chenopodium quinoa]
miR160	XM_021865745.1	3	NA	2.5	NA	XM_021865745.1	-	-	XP_021721437.1	3.2e-215	UPF0496 protein At3g19330-like isoform X2 [Chenopodium quinoa]
miR160	XM_021872938.1	3	NA	1.5	NA	XM_021872938.1	-	K20556|1|6.7e-130|467.2|thj:104817260|cytochrome P450 family 76 subfamily C	XP_021728630.1	2.8e-291	cytochrome P450 76AD1-like [Chenopodium quinoa]
miR160	XR_002510562.1	0	NA	0	NA	XR_002510562.1	-	-	OAY38823.1	3.3e-07	hypothetical protein MANES_10G045100 [Manihot esculenta]
miR160a-5p	XM_021866782.1	1.5	NA	1	NA	XM_021866782.1	-	K14486|1|2.8e-35|152.5|gab:108453624|auxin response factor	XP_021722474.1	4.2e-287	auxin response factor 17-like [Chenopodium quinoa]
miR160a-5p	XM_021874932.1	0.5	NA	0.5	NA	XM_021874932.1	-	K14486|1|1.2e-67|261.2|sind:105159332|auxin response factor	XP_021730624.1	0	auxin response factor 18-like [Chenopodium quinoa]
miR160a-5p	XM_021877437.1	1.5	NA	1	NA	XM_021877437.1	-	K14486|1|8.9e-48|194.9|sind:105175642|auxin response factor	XP_021733129.1	0	auxin response factor 17-like [Chenopodium quinoa]
miR160a-5p	XM_021892663.1	1.5	NA	1	NA	XM_021892663.1	-	K14486|1|1.3e-55|220.7|spen:107011491|auxin response factor	XP_021748355.1	0	auxin response factor 17-like [Chenopodium quinoa]
miR160a-5p	XM_021904434.1	0.5	NA	0.5	NA	XM_021904434.1	-	K14486|1|1.6e-67|260.8|sind:105159332|auxin response factor	XP_021760126.1	0	auxin response factor 18-like [Chenopodium quinoa]
miR160a-5p	XM_021904791.1	1.5	NA	1	NA	XM_021904791.1	-	K14486|1|8.4e-53|211.5|spen:107011491|auxin response factor	XP_021760483.1	0	auxin response factor 17-like [Chenopodium quinoa]
miR160a-5p	XM_021915345.1	2	NA	1.2	NA	XM_021915345.1	-	K14486|1|1.3e-74|283.9|bvg:104901644|auxin response factor	XP_021771037.1	0	auxin response factor 18-like [Chenopodium quinoa]
miR160a-5p	XM_021915346.1	2	NA	1.2	NA	XM_021915346.1	-	K14486|1|1.2e-74|283.9|bvg:104901644|auxin response factor	XP_021771037.1	0	auxin response factor 18-like [Chenopodium quinoa]
miR160a-5p	XM_021919419.1	2	NA	1.2	NA	XM_021919419.1	-	K14486|1|6.6e-75|285.0|gab:108464030|auxin response factor	XP_021775111.1	0	auxin response factor 18-like [Chenopodium quinoa]
miR160a-5p_1	XM_021866782.1	2.5	NA	1	NA	XM_021866782.1	-	K14486|1|2.8e-35|152.5|gab:108453624|auxin response factor	XP_021722474.1	4.2e-287	auxin response factor 17-like [Chenopodium quinoa]
miR160a-5p_1	XM_021874932.1	1.5	NA	1	NA	XM_021874932.1	-	K14486|1|1.2e-67|261.2|sind:105159332|auxin response factor	XP_021730624.1	0	auxin response factor 18-like [Chenopodium quinoa]
miR160a-5p_1	XM_021877437.1	2.5	NA	1	NA	XM_021877437.1	-	K14486|1|8.9e-48|194.9|sind:105175642|auxin response factor	XP_021733129.1	0	auxin response factor 17-like [Chenopodium quinoa]
miR160a-5p_1	XM_021892663.1	2.5	NA	1	NA	XM_021892663.1	-	K14486|1|1.3e-55|220.7|spen:107011491|auxin response factor	XP_021748355.1	0	auxin response factor 17-like [Chenopodium quinoa]
miR160a-5p_1	XM_021904434.1	1.5	NA	1	NA	XM_021904434.1	-	K14486|1|1.6e-67|260.8|sind:105159332|auxin response factor	XP_021760126.1	0	auxin response factor 18-like [Chenopodium quinoa]
miR160a-5p_1	XM_021904791.1	2.5	NA	1	NA	XM_021904791.1	-	K14486|1|8.4e-53|211.5|spen:107011491|auxin response factor	XP_021760483.1	0	auxin response factor 17-like [Chenopodium quinoa]
miR160a-5p_1	XM_021915345.1	3	NA	1.5	NA	XM_021915345.1	-	K14486|1|1.3e-74|283.9|bvg:104901644|auxin response factor	XP_021771037.1	0	auxin response factor 18-like [Chenopodium quinoa]
miR160a-5p_1	XM_021915346.1	3	NA	1.5	NA	XM_021915346.1	-	K14486|1|1.2e-74|283.9|bvg:104901644|auxin response factor	XP_021771037.1	0	auxin response factor 18-like [Chenopodium quinoa]
miR160a-5p_1	XM_021919419.1	3	NA	1.5	NA	XM_021919419.1	-	K14486|1|6.6e-75|285.0|gab:108464030|auxin response factor	XP_021775111.1	0	auxin response factor 18-like [Chenopodium quinoa]
miR160b_1	XM_021866782.1	0.5	NA	0.5	NA	XM_021866782.1	-	K14486|1|2.8e-35|152.5|gab:108453624|auxin response factor	XP_021722474.1	4.2e-287	auxin response factor 17-like [Chenopodium quinoa]
miR160b_1	XM_021874932.1	0.5	NA	0.5	NA	XM_021874932.1	-	K14486|1|1.2e-67|261.2|sind:105159332|auxin response factor	XP_021730624.1	0	auxin response factor 18-like [Chenopodium quinoa]
miR160b_1	XM_021877437.1	0.5	NA	0.5	NA	XM_021877437.1	-	K14486|1|8.9e-48|194.9|sind:105175642|auxin response factor	XP_021733129.1	0	auxin response factor 17-like [Chenopodium quinoa]
miR160b_1	XM_021892663.1	0.5	NA	0.5	NA	XM_021892663.1	-	K14486|1|1.3e-55|220.7|spen:107011491|auxin response factor	XP_021748355.1	0	auxin response factor 17-like [Chenopodium quinoa]
miR160b_1	XM_021904434.1	0.5	NA	0.5	NA	XM_021904434.1	-	K14486|1|1.6e-67|260.8|sind:105159332|auxin response factor	XP_021760126.1	0	auxin response factor 18-like [Chenopodium quinoa]
miR160b_1	XM_021904791.1	0.5	NA	0.5	NA	XM_021904791.1	-	K14486|1|8.4e-53|211.5|spen:107011491|auxin response factor	XP_021760483.1	0	auxin response factor 17-like [Chenopodium quinoa]
miR160b_1	XM_021915345.1	1	NA	0.8	NA	XM_021915345.1	-	K14486|1|1.3e-74|283.9|bvg:104901644|auxin response factor	XP_021771037.1	0	auxin response factor 18-like [Chenopodium quinoa]
miR160b_1	XM_021915346.1	1	NA	0.8	NA	XM_021915346.1	-	K14486|1|1.2e-74|283.9|bvg:104901644|auxin response factor	XP_021771037.1	0	auxin response factor 18-like [Chenopodium quinoa]
miR160b_1	XM_021919419.1	1	NA	0.8	NA	XM_021919419.1	-	K14486|1|6.6e-75|285.0|gab:108464030|auxin response factor	XP_021775111.1	0	auxin response factor 18-like [Chenopodium quinoa]
miR160g	XM_021866782.1	2.5	NA	1.5	NA	XM_021866782.1	-	K14486|1|2.8e-35|152.5|gab:108453624|auxin response factor	XP_021722474.1	4.2e-287	auxin response factor 17-like [Chenopodium quinoa]
miR160g	XM_021874932.1	1.5	NA	1	NA	XM_021874932.1	-	K14486|1|1.2e-67|261.2|sind:105159332|auxin response factor	XP_021730624.1	0	auxin response factor 18-like [Chenopodium quinoa]
miR160g	XM_021877437.1	2.5	NA	1.5	NA	XM_021877437.1	-	K14486|1|8.9e-48|194.9|sind:105175642|auxin response factor	XP_021733129.1	0	auxin response factor 17-like [Chenopodium quinoa]
miR160g	XM_021892663.1	2.5	NA	1.5	NA	XM_021892663.1	-	K14486|1|1.3e-55|220.7|spen:107011491|auxin response factor	XP_021748355.1	0	auxin response factor 17-like [Chenopodium quinoa]
miR160g	XM_021904434.1	1.5	NA	1	NA	XM_021904434.1	-	K14486|1|1.6e-67|260.8|sind:105159332|auxin response factor	XP_021760126.1	0	auxin response factor 18-like [Chenopodium quinoa]
miR160g	XM_021904791.1	2.5	NA	1.5	NA	XM_021904791.1	-	K14486|1|8.4e-53|211.5|spen:107011491|auxin response factor	XP_021760483.1	0	auxin response factor 17-like [Chenopodium quinoa]
miR160g	XM_021915345.1	3	NA	1.8	NA	XM_021915345.1	-	K14486|1|1.3e-74|283.9|bvg:104901644|auxin response factor	XP_021771037.1	0	auxin response factor 18-like [Chenopodium quinoa]
miR160g	XM_021915346.1	3	NA	1.8	NA	XM_021915346.1	-	K14486|1|1.2e-74|283.9|bvg:104901644|auxin response factor	XP_021771037.1	0	auxin response factor 18-like [Chenopodium quinoa]
miR160g	XM_021919419.1	3	NA	1.8	NA	XM_021919419.1	-	K14486|1|6.6e-75|285.0|gab:108464030|auxin response factor	XP_021775111.1	0	auxin response factor 18-like [Chenopodium quinoa]
miR160h_1	XM_021866782.1	1	NA	0.5	NA	XM_021866782.1	-	K14486|1|2.8e-35|152.5|gab:108453624|auxin response factor	XP_021722474.1	4.2e-287	auxin response factor 17-like [Chenopodium quinoa]
miR160h_1	XM_021874932.1	0	NA	0	NA	XM_021874932.1	-	K14486|1|1.2e-67|261.2|sind:105159332|auxin response factor	XP_021730624.1	0	auxin response factor 18-like [Chenopodium quinoa]
miR160h_1	XM_021877437.1	1	NA	0.5	NA	XM_021877437.1	-	K14486|1|8.9e-48|194.9|sind:105175642|auxin response factor	XP_021733129.1	0	auxin response factor 17-like [Chenopodium quinoa]
miR160h_1	XM_021892663.1	1	NA	0.5	NA	XM_021892663.1	-	K14486|1|1.3e-55|220.7|spen:107011491|auxin response factor	XP_021748355.1	0	auxin response factor 17-like [Chenopodium quinoa]
miR160h_1	XM_021904434.1	0	NA	0	NA	XM_021904434.1	-	K14486|1|1.6e-67|260.8|sind:105159332|auxin response factor	XP_021760126.1	0	auxin response factor 18-like [Chenopodium quinoa]
miR160h_1	XM_021904791.1	1	NA	0.5	NA	XM_021904791.1	-	K14486|1|8.4e-53|211.5|spen:107011491|auxin response factor	XP_021760483.1	0	auxin response factor 17-like [Chenopodium quinoa]
miR160h_1	XM_021915345.1	3	NA	2.2	NA	XM_021915345.1	-	K14486|1|1.3e-74|283.9|bvg:104901644|auxin response factor	XP_021771037.1	0	auxin response factor 18-like [Chenopodium quinoa]
miR160h_1	XM_021915346.1	3	NA	2.2	NA	XM_021915346.1	-	K14486|1|1.2e-74|283.9|bvg:104901644|auxin response factor	XP_021771037.1	0	auxin response factor 18-like [Chenopodium quinoa]
miR160h_1	XM_021919419.1	3	NA	2.2	NA	XM_021919419.1	-	K14486|1|6.6e-75|285.0|gab:108464030|auxin response factor	XP_021775111.1	0	auxin response factor 18-like [Chenopodium quinoa]
miR164_1	XM_021913067.1	3.5	NA	2.5	NA	XM_021913067.1	-	K11797|1|0.0e+00|3187.5|cqi:110733049|PH-interacting protein	XP_021768759.1	0	PH-interacting protein-like isoform X1 [Chenopodium quinoa]
miR164_1	XM_021914391.1	3.5	NA	2.5	NA	XM_021914391.1	-	K11797|1|0.0e+00|3188.3|cqi:110734301|PH-interacting protein	XP_021770083.1	0	PH-interacting protein-like [Chenopodium quinoa]
miR164a_2	XM_021863586.1	3	NA	2	NA	XM_021863586.1	-	K00521|1|7.7e-37|158.7|cmos:111447866|ferric-chelate reductase [EC:1.16.1.7]!K02184|3|7.5e-08|62.4|psom:113296474|formin 2	XP_021719278.1	2.9e-244	protein CUP-SHAPED COTYLEDON 2-like [Chenopodium quinoa]
miR164a_2	XM_021867189.1	0	NA	0	NA	XM_021867189.1	GO:0005634,GO:0003677,GO:0006355,GO:0006351,	K00521|1|1.0e-30|137.5|cmos:111447866|ferric-chelate reductase [EC:1.16.1.7]!K13126|3|6.2e-12|75.1|fve:101312606|polyadenylate-binding protein!K05941|4|3.2e-08|62.8|mdm:103435918|glutathione gamma-glutamylcysteinyltransferase [EC:2.3.2.15]!K16296|5|9.3e-08|61.2|aof:109839885|serine carboxypeptidase-like clade I [EC:3.4.16.-]	XP_021722881.1	1.2e-194	NAC domain-containing protein 21/22-like isoform X1 [Chenopodium quinoa]
miR164a_2	XM_021867191.1	0	NA	0	NA	XM_021867191.1	-	K00521|1|1.9e-29|133.3|cmos:111447866|ferric-chelate reductase [EC:1.16.1.7]!K13126|3|6.2e-12|75.1|fve:101312606|polyadenylate-binding protein!K05941|4|2.4e-08|63.2|mdm:103435918|glutathione gamma-glutamylcysteinyltransferase [EC:2.3.2.15]!K16296|5|9.3e-08|61.2|aof:109839885|serine carboxypeptidase-like clade I [EC:3.4.16.-]	XP_021722883.1	1.7e-193	NAC domain-containing protein 21/22-like isoform X2 [Chenopodium quinoa]
miR164a_2	XM_021878012.1	0	NA	0	NA	XM_021878012.1	GO:0005634,GO:0003677,GO:0006355,GO:0006351,	K00521|1|9.1e-31|137.5|cmos:111447866|ferric-chelate reductase [EC:1.16.1.7]!K13126|3|5.6e-12|75.1|fve:101312606|polyadenylate-binding protein!K05941|4|2.9e-08|62.8|mdm:103435918|glutathione gamma-glutamylcysteinyltransferase [EC:2.3.2.15]!K16296|5|8.3e-08|61.2|aof:109839885|serine carboxypeptidase-like clade I [EC:3.4.16.-]	XP_021733704.1	1.4e-194	NAC domain-containing protein 21/22-like isoform X1 [Chenopodium quinoa]
miR164a_2	XM_021878019.1	0	NA	0	NA	XM_021878019.1	-	K00521|1|1.7e-29|133.3|cmos:111447866|ferric-chelate reductase [EC:1.16.1.7]!K13126|3|5.5e-12|75.1|fve:101312606|polyadenylate-binding protein!K05941|4|2.2e-08|63.2|mdm:103435918|glutathione gamma-glutamylcysteinyltransferase [EC:2.3.2.15]!K16296|5|8.3e-08|61.2|aof:109839885|serine carboxypeptidase-like clade I [EC:3.4.16.-]	XP_021733711.1	2e-193	NAC domain-containing protein 21/22-like isoform X2 [Chenopodium quinoa]
miR164a_2	XM_021882127.1	3	NA	2	NA	XM_021882127.1	-	-	XP_021737819.1	3.2e-101	uncharacterized protein LOC110704340 [Chenopodium quinoa]
miR164a_2	XM_021891342.1	3	NA	2	NA	XM_021891342.1	-	K11808|1|1.1e-297|1025.0|bvg:104902182|phosphoribosylaminoimidazole carboxylase [EC:4.1.1.21]	XP_021747034.1	0	phosphoribosylaminoimidazole carboxylase, chloroplastic-like isoform X1 [Chenopodium quinoa]
miR164a_2	XM_021891343.1	3	NA	2	NA	XM_021891343.1	-	K11808|1|1.2e-297|1025.0|bvg:104902182|phosphoribosylaminoimidazole carboxylase [EC:4.1.1.21]	XP_021747034.1	0	phosphoribosylaminoimidazole carboxylase, chloroplastic-like isoform X1 [Chenopodium quinoa]
miR164a_2	XM_021891344.1	3	NA	2	NA	XM_021891344.1	-	K11808|1|0.0e+00|1229.5|cqi:110712887|phosphoribosylaminoimidazole carboxylase [EC:4.1.1.21]	XP_021747036.1	0	phosphoribosylaminoimidazole carboxylase, chloroplastic-like isoform X2 [Chenopodium quinoa]
miR164a_2	XM_021895309.1	3	NA	2	NA	XM_021895309.1	-	-	XP_021751001.1	3.1e-101	uncharacterized protein LOC110716661 [Chenopodium quinoa]
miR164a_2	XM_021918032.1	3	NA	2	NA	XM_021918032.1	-	K00521|1|8.4e-37|158.7|cmos:111447866|ferric-chelate reductase [EC:1.16.1.7]!K13126|3|4.9e-13|79.7|fve:101312606|polyadenylate-binding protein!K16296|4|2.3e-10|70.9|aof:109839885|serine carboxypeptidase-like clade I [EC:3.4.16.-]!K05941|5|1.6e-08|64.7|mdm:103435918|glutathione gamma-glutamylcysteinyltransferase [EC:2.3.2.15]	XP_021773724.1	7.4e-241	protein CUP-SHAPED COTYLEDON 2-like [Chenopodium quinoa]
miR164a_2	XR_002509815.1	3	NA	2	NA	XR_002509815.1	-	K11808|1|3.1e-84|317.0|cqi:110712887|phosphoribosylaminoimidazole carboxylase [EC:4.1.1.21]	XP_021747368.1	2.9e-136	uncharacterized protein LOC110713219 [Chenopodium quinoa]
miR164a_2	XR_002509816.1	3	NA	2	NA	XR_002509816.1	-	K11808|1|3.1e-84|317.0|cqi:110712887|phosphoribosylaminoimidazole carboxylase [EC:4.1.1.21]	XP_021747368.1	2.8e-147	uncharacterized protein LOC110713219 [Chenopodium quinoa]
miR164a_2	XR_002509817.1	3	NA	2	NA	XR_002509817.1	-	K11808|1|1.5e-86|324.7|cqi:110712887|phosphoribosylaminoimidazole carboxylase [EC:4.1.1.21]	XP_021747368.1	2.8e-147	uncharacterized protein LOC110713219 [Chenopodium quinoa]
miR164a_2	XR_002509818.1	3	NA	2	NA	XR_002509818.1	-	K11808|1|3.0e-84|317.0|cqi:110712887|phosphoribosylaminoimidazole carboxylase [EC:4.1.1.21]	XP_021747368.1	2.7e-147	uncharacterized protein LOC110713219 [Chenopodium quinoa]
miR164a_2	XR_002509819.1	3	NA	2	NA	XR_002509819.1	-	K11808|1|3.0e-84|317.0|cqi:110712887|phosphoribosylaminoimidazole carboxylase [EC:4.1.1.21]	XP_021747034.1	1.6e-83	phosphoribosylaminoimidazole carboxylase, chloroplastic-like isoform X1 [Chenopodium quinoa]
miR164a_4	XM_021863586.1	3	NA	1.5	NA	XM_021863586.1	-	K00521|1|7.7e-37|158.7|cmos:111447866|ferric-chelate reductase [EC:1.16.1.7]!K02184|3|7.5e-08|62.4|psom:113296474|formin 2	XP_021719278.1	2.9e-244	protein CUP-SHAPED COTYLEDON 2-like [Chenopodium quinoa]
miR164a_4	XM_021867189.1	2	NA	1.5	NA	XM_021867189.1	GO:0005634,GO:0003677,GO:0006355,GO:0006351,	K00521|1|1.0e-30|137.5|cmos:111447866|ferric-chelate reductase [EC:1.16.1.7]!K13126|3|6.2e-12|75.1|fve:101312606|polyadenylate-binding protein!K05941|4|3.2e-08|62.8|mdm:103435918|glutathione gamma-glutamylcysteinyltransferase [EC:2.3.2.15]!K16296|5|9.3e-08|61.2|aof:109839885|serine carboxypeptidase-like clade I [EC:3.4.16.-]	XP_021722881.1	1.2e-194	NAC domain-containing protein 21/22-like isoform X1 [Chenopodium quinoa]
miR164a_4	XM_021867191.1	2	NA	1.5	NA	XM_021867191.1	-	K00521|1|1.9e-29|133.3|cmos:111447866|ferric-chelate reductase [EC:1.16.1.7]!K13126|3|6.2e-12|75.1|fve:101312606|polyadenylate-binding protein!K05941|4|2.4e-08|63.2|mdm:103435918|glutathione gamma-glutamylcysteinyltransferase [EC:2.3.2.15]!K16296|5|9.3e-08|61.2|aof:109839885|serine carboxypeptidase-like clade I [EC:3.4.16.-]	XP_021722883.1	1.7e-193	NAC domain-containing protein 21/22-like isoform X2 [Chenopodium quinoa]
miR164a_4	XM_021875887.1	3	NA	2	NA	XM_021875887.1	GO:0005634,GO:0003677,	K15397|1|2.1e-17|92.4|cpep:111776416|3-ketoacyl-CoA synthase [EC:2.3.1.199]!K22390|2|9.3e-10|67.0|pavi:110768511|acid phosphatase type 7!K09522|3|5.6e-07|57.8|ini:109160841|DnaJ homolog subfamily C member 2	XP_021731579.1	2.4e-48	protein RADIALIS-like 4 [Chenopodium quinoa]
miR164a_4	XM_021878012.1	2	NA	1.5	NA	XM_021878012.1	GO:0005634,GO:0003677,GO:0006355,GO:0006351,	K00521|1|9.1e-31|137.5|cmos:111447866|ferric-chelate reductase [EC:1.16.1.7]!K13126|3|5.6e-12|75.1|fve:101312606|polyadenylate-binding protein!K05941|4|2.9e-08|62.8|mdm:103435918|glutathione gamma-glutamylcysteinyltransferase [EC:2.3.2.15]!K16296|5|8.3e-08|61.2|aof:109839885|serine carboxypeptidase-like clade I [EC:3.4.16.-]	XP_021733704.1	1.4e-194	NAC domain-containing protein 21/22-like isoform X1 [Chenopodium quinoa]
miR164a_4	XM_021878019.1	2	NA	1.5	NA	XM_021878019.1	-	K00521|1|1.7e-29|133.3|cmos:111447866|ferric-chelate reductase [EC:1.16.1.7]!K13126|3|5.5e-12|75.1|fve:101312606|polyadenylate-binding protein!K05941|4|2.2e-08|63.2|mdm:103435918|glutathione gamma-glutamylcysteinyltransferase [EC:2.3.2.15]!K16296|5|8.3e-08|61.2|aof:109839885|serine carboxypeptidase-like clade I [EC:3.4.16.-]	XP_021733711.1	2e-193	NAC domain-containing protein 21/22-like isoform X2 [Chenopodium quinoa]
miR164a_4	XM_021878176.1	3	NA	1	NA	XM_021878176.1	-	K00521|1|2.1e-35|153.3|cmos:111447866|ferric-chelate reductase [EC:1.16.1.7]!K13126|3|5.9e-14|82.0|fve:101312606|polyadenylate-binding protein!K16296|4|6.7e-10|68.6|aof:109839885|serine carboxypeptidase-like clade I [EC:3.4.16.-]!K05941|5|1.8e-07|60.5|mdm:103435918|glutathione gamma-glutamylcysteinyltransferase [EC:2.3.2.15]	XP_021733868.1	2.1e-219	NAC domain-containing protein 100-like [Chenopodium quinoa]
miR164a_4	XM_021892487.1	3.5	NA	2	NA	XM_021892487.1	-	-	XP_021748179.1	1.1e-283	uncharacterized protein LOC110714028 [Chenopodium quinoa]
miR164a_4	XM_021892488.1	3.5	NA	2	NA	XM_021892488.1	-	-	XP_021748179.1	1e-283	uncharacterized protein LOC110714028 [Chenopodium quinoa]
miR164a_4	XM_021900650.1	3.5	NA	2	NA	XM_021900650.1	-	-	XP_021756342.1	2.5e-283	uncharacterized protein LOC110721491 isoform X1 [Chenopodium quinoa]
miR164a_4	XM_021900651.1	3.5	NA	2	NA	XM_021900651.1	-	-	XP_021756342.1	2.2e-283	uncharacterized protein LOC110721491 isoform X1 [Chenopodium quinoa]
miR164a_4	XM_021900652.1	3.5	NA	2	NA	XM_021900652.1	-	-	XP_021756342.1	1.6e-248	uncharacterized protein LOC110721491 isoform X1 [Chenopodium quinoa]
miR164a_4	XM_021905908.1	3	NA	1	NA	XM_021905908.1	-	K00521|1|1.0e-34|151.0|cpep:111802683|ferric-chelate reductase [EC:1.16.1.7]!K13126|3|4.4e-14|82.4|fve:101312606|polyadenylate-binding protein!K16296|4|6.5e-10|68.6|aof:109839885|serine carboxypeptidase-like clade I [EC:3.4.16.-]!K05941|5|1.8e-07|60.5|mdm:103435918|glutathione gamma-glutamylcysteinyltransferase [EC:2.3.2.15]	XP_021761600.1	1.9e-217	NAC domain-containing protein 100-like [Chenopodium quinoa]
miR164a_4	XM_021918032.1	3	NA	1.5	NA	XM_021918032.1	-	K00521|1|8.4e-37|158.7|cmos:111447866|ferric-chelate reductase [EC:1.16.1.7]!K13126|3|4.9e-13|79.7|fve:101312606|polyadenylate-binding protein!K16296|4|2.3e-10|70.9|aof:109839885|serine carboxypeptidase-like clade I [EC:3.4.16.-]!K05941|5|1.6e-08|64.7|mdm:103435918|glutathione gamma-glutamylcysteinyltransferase [EC:2.3.2.15]	XP_021773724.1	7.4e-241	protein CUP-SHAPED COTYLEDON 2-like [Chenopodium quinoa]
miR164b	XM_021863586.1	2	NA	1	NA	XM_021863586.1	-	K00521|1|7.7e-37|158.7|cmos:111447866|ferric-chelate reductase [EC:1.16.1.7]!K02184|3|7.5e-08|62.4|psom:113296474|formin 2	XP_021719278.1	2.9e-244	protein CUP-SHAPED COTYLEDON 2-like [Chenopodium quinoa]
miR164b	XM_021867189.1	1	NA	1	NA	XM_021867189.1	GO:0005634,GO:0003677,GO:0006355,GO:0006351,	K00521|1|1.0e-30|137.5|cmos:111447866|ferric-chelate reductase [EC:1.16.1.7]!K13126|3|6.2e-12|75.1|fve:101312606|polyadenylate-binding protein!K05941|4|3.2e-08|62.8|mdm:103435918|glutathione gamma-glutamylcysteinyltransferase [EC:2.3.2.15]!K16296|5|9.3e-08|61.2|aof:109839885|serine carboxypeptidase-like clade I [EC:3.4.16.-]	XP_021722881.1	1.2e-194	NAC domain-containing protein 21/22-like isoform X1 [Chenopodium quinoa]
miR164b	XM_021867191.1	1	NA	1	NA	XM_021867191.1	-	K00521|1|1.9e-29|133.3|cmos:111447866|ferric-chelate reductase [EC:1.16.1.7]!K13126|3|6.2e-12|75.1|fve:101312606|polyadenylate-binding protein!K05941|4|2.4e-08|63.2|mdm:103435918|glutathione gamma-glutamylcysteinyltransferase [EC:2.3.2.15]!K16296|5|9.3e-08|61.2|aof:109839885|serine carboxypeptidase-like clade I [EC:3.4.16.-]	XP_021722883.1	1.7e-193	NAC domain-containing protein 21/22-like isoform X2 [Chenopodium quinoa]
miR164b	XM_021875887.1	3	NA	2	NA	XM_021875887.1	GO:0005634,GO:0003677,	K15397|1|2.1e-17|92.4|cpep:111776416|3-ketoacyl-CoA synthase [EC:2.3.1.199]!K22390|2|9.3e-10|67.0|pavi:110768511|acid phosphatase type 7!K09522|3|5.6e-07|57.8|ini:109160841|DnaJ homolog subfamily C member 2	XP_021731579.1	2.4e-48	protein RADIALIS-like 4 [Chenopodium quinoa]
miR164b	XM_021878012.1	1	NA	1	NA	XM_021878012.1	GO:0005634,GO:0003677,GO:0006355,GO:0006351,	K00521|1|9.1e-31|137.5|cmos:111447866|ferric-chelate reductase [EC:1.16.1.7]!K13126|3|5.6e-12|75.1|fve:101312606|polyadenylate-binding protein!K05941|4|2.9e-08|62.8|mdm:103435918|glutathione gamma-glutamylcysteinyltransferase [EC:2.3.2.15]!K16296|5|8.3e-08|61.2|aof:109839885|serine carboxypeptidase-like clade I [EC:3.4.16.-]	XP_021733704.1	1.4e-194	NAC domain-containing protein 21/22-like isoform X1 [Chenopodium quinoa]
miR164b	XM_021878019.1	1	NA	1	NA	XM_021878019.1	-	K00521|1|1.7e-29|133.3|cmos:111447866|ferric-chelate reductase [EC:1.16.1.7]!K13126|3|5.5e-12|75.1|fve:101312606|polyadenylate-binding protein!K05941|4|2.2e-08|63.2|mdm:103435918|glutathione gamma-glutamylcysteinyltransferase [EC:2.3.2.15]!K16296|5|8.3e-08|61.2|aof:109839885|serine carboxypeptidase-like clade I [EC:3.4.16.-]	XP_021733711.1	2e-193	NAC domain-containing protein 21/22-like isoform X2 [Chenopodium quinoa]
miR164b	XM_021878176.1	2	NA	1	NA	XM_021878176.1	-	K00521|1|2.1e-35|153.3|cmos:111447866|ferric-chelate reductase [EC:1.16.1.7]!K13126|3|5.9e-14|82.0|fve:101312606|polyadenylate-binding protein!K16296|4|6.7e-10|68.6|aof:109839885|serine carboxypeptidase-like clade I [EC:3.4.16.-]!K05941|5|1.8e-07|60.5|mdm:103435918|glutathione gamma-glutamylcysteinyltransferase [EC:2.3.2.15]	XP_021733868.1	2.1e-219	NAC domain-containing protein 100-like [Chenopodium quinoa]
miR164b	XM_021892487.1	3.5	NA	2	NA	XM_021892487.1	-	-	XP_021748179.1	1.1e-283	uncharacterized protein LOC110714028 [Chenopodium quinoa]
miR164b	XM_021892488.1	3.5	NA	2	NA	XM_021892488.1	-	-	XP_021748179.1	1e-283	uncharacterized protein LOC110714028 [Chenopodium quinoa]
miR164b	XM_021900650.1	3.5	NA	2	NA	XM_021900650.1	-	-	XP_021756342.1	2.5e-283	uncharacterized protein LOC110721491 isoform X1 [Chenopodium quinoa]
miR164b	XM_021900651.1	3.5	NA	2	NA	XM_021900651.1	-	-	XP_021756342.1	2.2e-283	uncharacterized protein LOC110721491 isoform X1 [Chenopodium quinoa]
miR164b	XM_021900652.1	3.5	NA	2	NA	XM_021900652.1	-	-	XP_021756342.1	1.6e-248	uncharacterized protein LOC110721491 isoform X1 [Chenopodium quinoa]
miR164b	XM_021905908.1	2	NA	1	NA	XM_021905908.1	-	K00521|1|1.0e-34|151.0|cpep:111802683|ferric-chelate reductase [EC:1.16.1.7]!K13126|3|4.4e-14|82.4|fve:101312606|polyadenylate-binding protein!K16296|4|6.5e-10|68.6|aof:109839885|serine carboxypeptidase-like clade I [EC:3.4.16.-]!K05941|5|1.8e-07|60.5|mdm:103435918|glutathione gamma-glutamylcysteinyltransferase [EC:2.3.2.15]	XP_021761600.1	1.9e-217	NAC domain-containing protein 100-like [Chenopodium quinoa]
miR164b	XM_021918032.1	2	NA	1	NA	XM_021918032.1	-	K00521|1|8.4e-37|158.7|cmos:111447866|ferric-chelate reductase [EC:1.16.1.7]!K13126|3|4.9e-13|79.7|fve:101312606|polyadenylate-binding protein!K16296|4|2.3e-10|70.9|aof:109839885|serine carboxypeptidase-like clade I [EC:3.4.16.-]!K05941|5|1.6e-08|64.7|mdm:103435918|glutathione gamma-glutamylcysteinyltransferase [EC:2.3.2.15]	XP_021773724.1	7.4e-241	protein CUP-SHAPED COTYLEDON 2-like [Chenopodium quinoa]
miR164c	XM_021863586.1	3	NA	1.5	NA	XM_021863586.1	-	K00521|1|7.7e-37|158.7|cmos:111447866|ferric-chelate reductase [EC:1.16.1.7]!K02184|3|7.5e-08|62.4|psom:113296474|formin 2	XP_021719278.1	2.9e-244	protein CUP-SHAPED COTYLEDON 2-like [Chenopodium quinoa]
miR164c	XM_021865728.1	3	NA	1.5	NA	XM_021865728.1	-	K00521|1|7.3e-36|154.5|cmos:111447866|ferric-chelate reductase [EC:1.16.1.7]!K13126|3|6.0e-14|81.6|fve:101312606|polyadenylate-binding protein!K16296|4|3.4e-09|65.9|aof:109839885|serine carboxypeptidase-like clade I [EC:3.4.16.-]!K12862|5|2.2e-08|63.2|nsy:104215049|pleiotropic regulator 1	XP_021721420.1	9.1e-202	NAC domain-containing protein 92-like [Chenopodium quinoa]
miR164c	XM_021878176.1	0	NA	0	NA	XM_021878176.1	-	K00521|1|2.1e-35|153.3|cmos:111447866|ferric-chelate reductase [EC:1.16.1.7]!K13126|3|5.9e-14|82.0|fve:101312606|polyadenylate-binding protein!K16296|4|6.7e-10|68.6|aof:109839885|serine carboxypeptidase-like clade I [EC:3.4.16.-]!K05941|5|1.8e-07|60.5|mdm:103435918|glutathione gamma-glutamylcysteinyltransferase [EC:2.3.2.15]	XP_021733868.1	2.1e-219	NAC domain-containing protein 100-like [Chenopodium quinoa]
miR164c	XM_021905908.1	0	NA	0	NA	XM_021905908.1	-	K00521|1|1.0e-34|151.0|cpep:111802683|ferric-chelate reductase [EC:1.16.1.7]!K13126|3|4.4e-14|82.4|fve:101312606|polyadenylate-binding protein!K16296|4|6.5e-10|68.6|aof:109839885|serine carboxypeptidase-like clade I [EC:3.4.16.-]!K05941|5|1.8e-07|60.5|mdm:103435918|glutathione gamma-glutamylcysteinyltransferase [EC:2.3.2.15]	XP_021761600.1	1.9e-217	NAC domain-containing protein 100-like [Chenopodium quinoa]
miR164c	XM_021915151.1	3	NA	1.5	NA	XM_021915151.1	GO:0005634,GO:0003677,GO:0006355,GO:0006351,	K00521|1|3.3e-36|155.6|cmos:111447866|ferric-chelate reductase [EC:1.16.1.7]!K13126|3|7.8e-14|81.3|fve:101312606|polyadenylate-binding protein!K16296|4|3.4e-09|65.9|aof:109839885|serine carboxypeptidase-like clade I [EC:3.4.16.-]!K12862|5|9.9e-09|64.3|nsy:104215049|pleiotropic regulator 1	XP_021770843.1	1e-197	NAC domain-containing protein 92-like [Chenopodium quinoa]
miR164c	XM_021915152.1	3	NA	1.5	NA	XM_021915152.1	GO:0005634,GO:0003677,GO:0006355,GO:0006351,	K00521|1|1.1e-35|154.1|cmos:111447866|ferric-chelate reductase [EC:1.16.1.7]!K13126|3|8.8e-14|81.3|fve:101312606|polyadenylate-binding protein!K16296|4|3.8e-09|65.9|aof:109839885|serine carboxypeptidase-like clade I [EC:3.4.16.-]!K12862|5|1.1e-08|64.3|nsy:104215049|pleiotropic regulator 1	XP_021770843.1	1.2e-197	NAC domain-containing protein 92-like [Chenopodium quinoa]
miR164c	XM_021918032.1	3	NA	1.5	NA	XM_021918032.1	-	K00521|1|8.4e-37|158.7|cmos:111447866|ferric-chelate reductase [EC:1.16.1.7]!K13126|3|4.9e-13|79.7|fve:101312606|polyadenylate-binding protein!K16296|4|2.3e-10|70.9|aof:109839885|serine carboxypeptidase-like clade I [EC:3.4.16.-]!K05941|5|1.6e-08|64.7|mdm:103435918|glutathione gamma-glutamylcysteinyltransferase [EC:2.3.2.15]	XP_021773724.1	7.4e-241	protein CUP-SHAPED COTYLEDON 2-like [Chenopodium quinoa]
miR164e-5p	XM_021867189.1	3	NA	2	NA	XM_021867189.1	GO:0005634,GO:0003677,GO:0006355,GO:0006351,	K00521|1|1.0e-30|137.5|cmos:111447866|ferric-chelate reductase [EC:1.16.1.7]!K13126|3|6.2e-12|75.1|fve:101312606|polyadenylate-binding protein!K05941|4|3.2e-08|62.8|mdm:103435918|glutathione gamma-glutamylcysteinyltransferase [EC:2.3.2.15]!K16296|5|9.3e-08|61.2|aof:109839885|serine carboxypeptidase-like clade I [EC:3.4.16.-]	XP_021722881.1	1.2e-194	NAC domain-containing protein 21/22-like isoform X1 [Chenopodium quinoa]
miR164e-5p	XM_021867191.1	3	NA	2	NA	XM_021867191.1	-	K00521|1|1.9e-29|133.3|cmos:111447866|ferric-chelate reductase [EC:1.16.1.7]!K13126|3|6.2e-12|75.1|fve:101312606|polyadenylate-binding protein!K05941|4|2.4e-08|63.2|mdm:103435918|glutathione gamma-glutamylcysteinyltransferase [EC:2.3.2.15]!K16296|5|9.3e-08|61.2|aof:109839885|serine carboxypeptidase-like clade I [EC:3.4.16.-]	XP_021722883.1	1.7e-193	NAC domain-containing protein 21/22-like isoform X2 [Chenopodium quinoa]
miR164e-5p	XM_021878012.1	3	NA	2	NA	XM_021878012.1	GO:0005634,GO:0003677,GO:0006355,GO:0006351,	K00521|1|9.1e-31|137.5|cmos:111447866|ferric-chelate reductase [EC:1.16.1.7]!K13126|3|5.6e-12|75.1|fve:101312606|polyadenylate-binding protein!K05941|4|2.9e-08|62.8|mdm:103435918|glutathione gamma-glutamylcysteinyltransferase [EC:2.3.2.15]!K16296|5|8.3e-08|61.2|aof:109839885|serine carboxypeptidase-like clade I [EC:3.4.16.-]	XP_021733704.1	1.4e-194	NAC domain-containing protein 21/22-like isoform X1 [Chenopodium quinoa]
miR164e-5p	XM_021878019.1	3	NA	2	NA	XM_021878019.1	-	K00521|1|1.7e-29|133.3|cmos:111447866|ferric-chelate reductase [EC:1.16.1.7]!K13126|3|5.5e-12|75.1|fve:101312606|polyadenylate-binding protein!K05941|4|2.2e-08|63.2|mdm:103435918|glutathione gamma-glutamylcysteinyltransferase [EC:2.3.2.15]!K16296|5|8.3e-08|61.2|aof:109839885|serine carboxypeptidase-like clade I [EC:3.4.16.-]	XP_021733711.1	2e-193	NAC domain-containing protein 21/22-like isoform X2 [Chenopodium quinoa]
miR164f_1	XM_021863586.1	3	NA	2	NA	XM_021863586.1	-	K00521|1|7.7e-37|158.7|cmos:111447866|ferric-chelate reductase [EC:1.16.1.7]!K02184|3|7.5e-08|62.4|psom:113296474|formin 2	XP_021719278.1	2.9e-244	protein CUP-SHAPED COTYLEDON 2-like [Chenopodium quinoa]
miR164f_1	XM_021867189.1	1	NA	1	NA	XM_021867189.1	GO:0005634,GO:0003677,GO:0006355,GO:0006351,	K00521|1|1.0e-30|137.5|cmos:111447866|ferric-chelate reductase [EC:1.16.1.7]!K13126|3|6.2e-12|75.1|fve:101312606|polyadenylate-binding protein!K05941|4|3.2e-08|62.8|mdm:103435918|glutathione gamma-glutamylcysteinyltransferase [EC:2.3.2.15]!K16296|5|9.3e-08|61.2|aof:109839885|serine carboxypeptidase-like clade I [EC:3.4.16.-]	XP_021722881.1	1.2e-194	NAC domain-containing protein 21/22-like isoform X1 [Chenopodium quinoa]
miR164f_1	XM_021867191.1	1	NA	1	NA	XM_021867191.1	-	K00521|1|1.9e-29|133.3|cmos:111447866|ferric-chelate reductase [EC:1.16.1.7]!K13126|3|6.2e-12|75.1|fve:101312606|polyadenylate-binding protein!K05941|4|2.4e-08|63.2|mdm:103435918|glutathione gamma-glutamylcysteinyltransferase [EC:2.3.2.15]!K16296|5|9.3e-08|61.2|aof:109839885|serine carboxypeptidase-like clade I [EC:3.4.16.-]	XP_021722883.1	1.7e-193	NAC domain-containing protein 21/22-like isoform X2 [Chenopodium quinoa]
miR164f_1	XM_021878012.1	1	NA	1	NA	XM_021878012.1	GO:0005634,GO:0003677,GO:0006355,GO:0006351,	K00521|1|9.1e-31|137.5|cmos:111447866|ferric-chelate reductase [EC:1.16.1.7]!K13126|3|5.6e-12|75.1|fve:101312606|polyadenylate-binding protein!K05941|4|2.9e-08|62.8|mdm:103435918|glutathione gamma-glutamylcysteinyltransferase [EC:2.3.2.15]!K16296|5|8.3e-08|61.2|aof:109839885|serine carboxypeptidase-like clade I [EC:3.4.16.-]	XP_021733704.1	1.4e-194	NAC domain-containing protein 21/22-like isoform X1 [Chenopodium quinoa]
miR164f_1	XM_021878019.1	1	NA	1	NA	XM_021878019.1	-	K00521|1|1.7e-29|133.3|cmos:111447866|ferric-chelate reductase [EC:1.16.1.7]!K13126|3|5.5e-12|75.1|fve:101312606|polyadenylate-binding protein!K05941|4|2.2e-08|63.2|mdm:103435918|glutathione gamma-glutamylcysteinyltransferase [EC:2.3.2.15]!K16296|5|8.3e-08|61.2|aof:109839885|serine carboxypeptidase-like clade I [EC:3.4.16.-]	XP_021733711.1	2e-193	NAC domain-containing protein 21/22-like isoform X2 [Chenopodium quinoa]
miR164f_1	XM_021918032.1	3	NA	2	NA	XM_021918032.1	-	K00521|1|8.4e-37|158.7|cmos:111447866|ferric-chelate reductase [EC:1.16.1.7]!K13126|3|4.9e-13|79.7|fve:101312606|polyadenylate-binding protein!K16296|4|2.3e-10|70.9|aof:109839885|serine carboxypeptidase-like clade I [EC:3.4.16.-]!K05941|5|1.6e-08|64.7|mdm:103435918|glutathione gamma-glutamylcysteinyltransferase [EC:2.3.2.15]	XP_021773724.1	7.4e-241	protein CUP-SHAPED COTYLEDON 2-like [Chenopodium quinoa]
miR166	XM_021881599.1	3.5	NA	1.8	NA	XM_021881599.1	-	K09338|1|0.0e+00|1632.8|bvg:104885558|homeobox-leucine zipper protein	XP_010668539.1	0	PREDICTED: homeobox-leucine zipper protein ATHB-8 [Beta vulgaris subsp. vulgaris]
miR166	XM_021881600.1	3.5	NA	1.8	NA	XM_021881600.1	-	K09338|1|0.0e+00|1632.8|bvg:104885558|homeobox-leucine zipper protein	XP_010668539.1	0	PREDICTED: homeobox-leucine zipper protein ATHB-8 [Beta vulgaris subsp. vulgaris]
miR166	XM_021883445.1	3.5	NA	1.8	NA	XM_021883445.1	-	K09338|1|0.0e+00|1637.9|bvg:104885558|homeobox-leucine zipper protein	XP_010668539.1	0	PREDICTED: homeobox-leucine zipper protein ATHB-8 [Beta vulgaris subsp. vulgaris]
miR166	XM_021883446.1	3.5	NA	1.8	NA	XM_021883446.1	-	K09338|1|0.0e+00|1637.9|bvg:104885558|homeobox-leucine zipper protein	XP_010668539.1	0	PREDICTED: homeobox-leucine zipper protein ATHB-8 [Beta vulgaris subsp. vulgaris]
miR166	XM_021886386.1	3.5	NA	2.2	NA	XM_021886386.1	GO:0000139,GO:0016021,GO:0000139,GO:0016021,GO:0008378,GO:0008378,GO:0006486,GO:0006486,	K20855|1|6.3e-198|692.6|cqi:110708290|beta-1,3-galactosyltransferase 1/2/3/4/5/7/8 [EC:2.4.1.-]	XP_021742078.1	3.3e-197	beta-1,3-galactosyltransferase 7-like [Chenopodium quinoa]
miR166	XM_021886388.1	3.5	NA	2.2	NA	XM_021886388.1	GO:0000139,GO:0016021,GO:0008378,GO:0006486,	K20855|1|6.1e-198|692.6|cqi:110708290|beta-1,3-galactosyltransferase 1/2/3/4/5/7/8 [EC:2.4.1.-]	XP_021742078.1	3.3e-197	beta-1,3-galactosyltransferase 7-like [Chenopodium quinoa]
miR166	XM_021894193.1	3.5	NA	1.8	NA	XM_021894193.1	-	K09338|1|0.0e+00|1523.1|mesc:110626538|homeobox-leucine zipper protein	XP_010691423.1	0	PREDICTED: homeobox-leucine zipper protein ATHB-15 isoform X1 [Beta vulgaris subsp. vulgaris]
miR166	XM_021909638.1	3.5	NA	1.8	NA	XM_021909638.1	-	K09338|1|0.0e+00|1521.5|mesc:110626538|homeobox-leucine zipper protein	XP_010691423.1	0	PREDICTED: homeobox-leucine zipper protein ATHB-15 isoform X1 [Beta vulgaris subsp. vulgaris]
miR166a	XM_021881599.1	0.5	NA	0.2	NA	XM_021881599.1	-	K09338|1|0.0e+00|1632.8|bvg:104885558|homeobox-leucine zipper protein	XP_010668539.1	0	PREDICTED: homeobox-leucine zipper protein ATHB-8 [Beta vulgaris subsp. vulgaris]
miR166a	XM_021881600.1	0.5	NA	0.2	NA	XM_021881600.1	-	K09338|1|0.0e+00|1632.8|bvg:104885558|homeobox-leucine zipper protein	XP_010668539.1	0	PREDICTED: homeobox-leucine zipper protein ATHB-8 [Beta vulgaris subsp. vulgaris]
miR166a	XM_021883445.1	0.5	NA	0.2	NA	XM_021883445.1	-	K09338|1|0.0e+00|1637.9|bvg:104885558|homeobox-leucine zipper protein	XP_010668539.1	0	PREDICTED: homeobox-leucine zipper protein ATHB-8 [Beta vulgaris subsp. vulgaris]
miR166a	XM_021883446.1	0.5	NA	0.2	NA	XM_021883446.1	-	K09338|1|0.0e+00|1637.9|bvg:104885558|homeobox-leucine zipper protein	XP_010668539.1	0	PREDICTED: homeobox-leucine zipper protein ATHB-8 [Beta vulgaris subsp. vulgaris]
miR166a	XM_021886386.1	3.5	NA	2.2	NA	XM_021886386.1	GO:0000139,GO:0016021,GO:0000139,GO:0016021,GO:0008378,GO:0008378,GO:0006486,GO:0006486,	K20855|1|6.3e-198|692.6|cqi:110708290|beta-1,3-galactosyltransferase 1/2/3/4/5/7/8 [EC:2.4.1.-]	XP_021742078.1	3.3e-197	beta-1,3-galactosyltransferase 7-like [Chenopodium quinoa]
miR166a	XM_021886388.1	3.5	NA	2.2	NA	XM_021886388.1	GO:0000139,GO:0016021,GO:0008378,GO:0006486,	K20855|1|6.1e-198|692.6|cqi:110708290|beta-1,3-galactosyltransferase 1/2/3/4/5/7/8 [EC:2.4.1.-]	XP_021742078.1	3.3e-197	beta-1,3-galactosyltransferase 7-like [Chenopodium quinoa]
miR166a	XM_021890249.1	1	NA	0.8	NA	XM_021890249.1	GO:0005634,GO:0003677,GO:0008289,	K09338|1|0.0e+00|1690.6|cqi:110711821|homeobox-leucine zipper protein	XP_021745941.1	0	homeobox-leucine zipper protein REVOLUTA-like [Chenopodium quinoa]
miR166a	XM_021894193.1	0.5	NA	0.2	NA	XM_021894193.1	-	K09338|1|0.0e+00|1523.1|mesc:110626538|homeobox-leucine zipper protein	XP_010691423.1	0	PREDICTED: homeobox-leucine zipper protein ATHB-15 isoform X1 [Beta vulgaris subsp. vulgaris]
miR166a	XM_021909638.1	0.5	NA	0.2	NA	XM_021909638.1	-	K09338|1|0.0e+00|1521.5|mesc:110626538|homeobox-leucine zipper protein	XP_010691423.1	0	PREDICTED: homeobox-leucine zipper protein ATHB-15 isoform X1 [Beta vulgaris subsp. vulgaris]
miR166a	XM_021917625.1	1	NA	0.8	NA	XM_021917625.1	GO:0005634,GO:0003677,GO:0008289,	K09338|1|0.0e+00|1689.9|cqi:110737279|homeobox-leucine zipper protein	XP_021773317.1	0	homeobox-leucine zipper protein REVOLUTA-like [Chenopodium quinoa]
miR166a	XR_002514518.1	3.5	NA	2.5	NA	XR_002514518.1	-	K01303|1|3.3e-57|226.9|fve:101311565|acylaminoacyl-peptidase [EC:3.4.19.1]!K00696|5|2.7e-35|154.1|mesc:110604864|sucrose-phosphate synthase [EC:2.4.1.14]	XP_021733268.1	0	uncharacterized protein LOC110700074 isoform X1 [Chenopodium quinoa]
miR166a	XR_002514519.1	3.5	NA	2.5	NA	XR_002514519.1	-	K01303|1|3.3e-57|226.9|fve:101311565|acylaminoacyl-peptidase [EC:3.4.19.1]!K00696|5|2.7e-35|154.1|mesc:110604864|sucrose-phosphate synthase [EC:2.4.1.14]	XP_021733268.1	0	uncharacterized protein LOC110700074 isoform X1 [Chenopodium quinoa]
miR166a-3p	XM_021881599.1	2.5	NA	1.2	NA	XM_021881599.1	-	K09338|1|0.0e+00|1632.8|bvg:104885558|homeobox-leucine zipper protein	XP_010668539.1	0	PREDICTED: homeobox-leucine zipper protein ATHB-8 [Beta vulgaris subsp. vulgaris]
miR166a-3p	XM_021881600.1	2.5	NA	1.2	NA	XM_021881600.1	-	K09338|1|0.0e+00|1632.8|bvg:104885558|homeobox-leucine zipper protein	XP_010668539.1	0	PREDICTED: homeobox-leucine zipper protein ATHB-8 [Beta vulgaris subsp. vulgaris]
miR166a-3p	XM_021883445.1	2.5	NA	1.2	NA	XM_021883445.1	-	K09338|1|0.0e+00|1637.9|bvg:104885558|homeobox-leucine zipper protein	XP_010668539.1	0	PREDICTED: homeobox-leucine zipper protein ATHB-8 [Beta vulgaris subsp. vulgaris]
miR166a-3p	XM_021883446.1	2.5	NA	1.2	NA	XM_021883446.1	-	K09338|1|0.0e+00|1637.9|bvg:104885558|homeobox-leucine zipper protein	XP_010668539.1	0	PREDICTED: homeobox-leucine zipper protein ATHB-8 [Beta vulgaris subsp. vulgaris]
miR166a-3p	XM_021886386.1	3.5	NA	2.2	NA	XM_021886386.1	GO:0000139,GO:0016021,GO:0000139,GO:0016021,GO:0008378,GO:0008378,GO:0006486,GO:0006486,	K20855|1|6.3e-198|692.6|cqi:110708290|beta-1,3-galactosyltransferase 1/2/3/4/5/7/8 [EC:2.4.1.-]	XP_021742078.1	3.3e-197	beta-1,3-galactosyltransferase 7-like [Chenopodium quinoa]
miR166a-3p	XM_021886388.1	3.5	NA	2.2	NA	XM_021886388.1	GO:0000139,GO:0016021,GO:0008378,GO:0006486,	K20855|1|6.1e-198|692.6|cqi:110708290|beta-1,3-galactosyltransferase 1/2/3/4/5/7/8 [EC:2.4.1.-]	XP_021742078.1	3.3e-197	beta-1,3-galactosyltransferase 7-like [Chenopodium quinoa]
miR166a-3p	XM_021890249.1	3	NA	1.8	NA	XM_021890249.1	GO:0005634,GO:0003677,GO:0008289,	K09338|1|0.0e+00|1690.6|cqi:110711821|homeobox-leucine zipper protein	XP_021745941.1	0	homeobox-leucine zipper protein REVOLUTA-like [Chenopodium quinoa]
miR166a-3p	XM_021894193.1	2.5	NA	1.2	NA	XM_021894193.1	-	K09338|1|0.0e+00|1523.1|mesc:110626538|homeobox-leucine zipper protein	XP_010691423.1	0	PREDICTED: homeobox-leucine zipper protein ATHB-15 isoform X1 [Beta vulgaris subsp. vulgaris]
miR166a-3p	XM_021909638.1	2.5	NA	1.2	NA	XM_021909638.1	-	K09338|1|0.0e+00|1521.5|mesc:110626538|homeobox-leucine zipper protein	XP_010691423.1	0	PREDICTED: homeobox-leucine zipper protein ATHB-15 isoform X1 [Beta vulgaris subsp. vulgaris]
miR166a-3p	XM_021917625.1	3	NA	1.8	NA	XM_021917625.1	GO:0005634,GO:0003677,GO:0008289,	K09338|1|0.0e+00|1689.9|cqi:110737279|homeobox-leucine zipper protein	XP_021773317.1	0	homeobox-leucine zipper protein REVOLUTA-like [Chenopodium quinoa]
miR166e	XM_021863024.1	3	NA	2.5	NA	XM_021863024.1	GO:0000139,GO:0016021,GO:0000139,GO:0016021,GO:0008378,GO:0008378,GO:0006486,GO:0006486,	K20855|1|3.0e-195|683.7|cqi:110686411|beta-1,3-galactosyltransferase 1/2/3/4/5/7/8 [EC:2.4.1.-]	XP_021718716.1	1.6e-194	beta-1,3-galactosyltransferase 7-like [Chenopodium quinoa]
miR166e	XM_021881599.1	2	NA	1	NA	XM_021881599.1	-	K09338|1|0.0e+00|1632.8|bvg:104885558|homeobox-leucine zipper protein	XP_010668539.1	0	PREDICTED: homeobox-leucine zipper protein ATHB-8 [Beta vulgaris subsp. vulgaris]
miR166e	XM_021881600.1	2	NA	1	NA	XM_021881600.1	-	K09338|1|0.0e+00|1632.8|bvg:104885558|homeobox-leucine zipper protein	XP_010668539.1	0	PREDICTED: homeobox-leucine zipper protein ATHB-8 [Beta vulgaris subsp. vulgaris]
miR166e	XM_021883445.1	2	NA	1	NA	XM_021883445.1	-	K09338|1|0.0e+00|1637.9|bvg:104885558|homeobox-leucine zipper protein	XP_010668539.1	0	PREDICTED: homeobox-leucine zipper protein ATHB-8 [Beta vulgaris subsp. vulgaris]
miR166e	XM_021883446.1	2	NA	1	NA	XM_021883446.1	-	K09338|1|0.0e+00|1637.9|bvg:104885558|homeobox-leucine zipper protein	XP_010668539.1	0	PREDICTED: homeobox-leucine zipper protein ATHB-8 [Beta vulgaris subsp. vulgaris]
miR166e	XM_021883627.1	3	NA	2	NA	XM_021883627.1	-	K00820|1|0.0e+00|1338.9|cqi:110705713|glucosamine---fructose-6-phosphate aminotransferase (isomerizing) [EC:2.6.1.16]	XP_021739319.1	0	glutamine--fructose-6-phosphate aminotransferase [isomerizing] 2-like isoform X1 [Chenopodium quinoa]
miR166e	XM_021883628.1	3	NA	2	NA	XM_021883628.1	-	K00820|1|0.0e+00|1332.8|cqi:110705713|glucosamine---fructose-6-phosphate aminotransferase (isomerizing) [EC:2.6.1.16]	XP_021739320.1	0	glutamine--fructose-6-phosphate aminotransferase [isomerizing] 2-like isoform X2 [Chenopodium quinoa]
miR166e	XM_021886386.1	3	NA	2.5	NA	XM_021886386.1	GO:0000139,GO:0016021,GO:0000139,GO:0016021,GO:0008378,GO:0008378,GO:0006486,GO:0006486,	K20855|1|6.3e-198|692.6|cqi:110708290|beta-1,3-galactosyltransferase 1/2/3/4/5/7/8 [EC:2.4.1.-]	XP_021742078.1	3.3e-197	beta-1,3-galactosyltransferase 7-like [Chenopodium quinoa]
miR166e	XM_021886388.1	3	NA	2.5	NA	XM_021886388.1	GO:0000139,GO:0016021,GO:0008378,GO:0006486,	K20855|1|6.1e-198|692.6|cqi:110708290|beta-1,3-galactosyltransferase 1/2/3/4/5/7/8 [EC:2.4.1.-]	XP_021742078.1	3.3e-197	beta-1,3-galactosyltransferase 7-like [Chenopodium quinoa]
miR166e	XM_021890249.1	2.5	NA	1.5	NA	XM_021890249.1	GO:0005634,GO:0003677,GO:0008289,	K09338|1|0.0e+00|1690.6|cqi:110711821|homeobox-leucine zipper protein	XP_021745941.1	0	homeobox-leucine zipper protein REVOLUTA-like [Chenopodium quinoa]
miR166e	XM_021894193.1	2	NA	1	NA	XM_021894193.1	-	K09338|1|0.0e+00|1523.1|mesc:110626538|homeobox-leucine zipper protein	XP_010691423.1	0	PREDICTED: homeobox-leucine zipper protein ATHB-15 isoform X1 [Beta vulgaris subsp. vulgaris]
miR166e	XM_021909638.1	2	NA	1	NA	XM_021909638.1	-	K09338|1|0.0e+00|1521.5|mesc:110626538|homeobox-leucine zipper protein	XP_010691423.1	0	PREDICTED: homeobox-leucine zipper protein ATHB-15 isoform X1 [Beta vulgaris subsp. vulgaris]
miR166e	XM_021917625.1	2.5	NA	1.5	NA	XM_021917625.1	GO:0005634,GO:0003677,GO:0008289,	K09338|1|0.0e+00|1689.9|cqi:110737279|homeobox-leucine zipper protein	XP_021773317.1	0	homeobox-leucine zipper protein REVOLUTA-like [Chenopodium quinoa]
miR166e-3p	XM_021881599.1	3	NA	1.5	NA	XM_021881599.1	-	K09338|1|0.0e+00|1632.8|bvg:104885558|homeobox-leucine zipper protein	XP_010668539.1	0	PREDICTED: homeobox-leucine zipper protein ATHB-8 [Beta vulgaris subsp. vulgaris]
miR166e-3p	XM_021881600.1	3	NA	1.5	NA	XM_021881600.1	-	K09338|1|0.0e+00|1632.8|bvg:104885558|homeobox-leucine zipper protein	XP_010668539.1	0	PREDICTED: homeobox-leucine zipper protein ATHB-8 [Beta vulgaris subsp. vulgaris]
miR166e-3p	XM_021883445.1	3	NA	1.5	NA	XM_021883445.1	-	K09338|1|0.0e+00|1637.9|bvg:104885558|homeobox-leucine zipper protein	XP_010668539.1	0	PREDICTED: homeobox-leucine zipper protein ATHB-8 [Beta vulgaris subsp. vulgaris]
miR166e-3p	XM_021883446.1	3	NA	1.5	NA	XM_021883446.1	-	K09338|1|0.0e+00|1637.9|bvg:104885558|homeobox-leucine zipper protein	XP_010668539.1	0	PREDICTED: homeobox-leucine zipper protein ATHB-8 [Beta vulgaris subsp. vulgaris]
miR166e-3p	XM_021890249.1	3.5	NA	1.5	NA	XM_021890249.1	GO:0005634,GO:0003677,GO:0008289,	K09338|1|0.0e+00|1690.6|cqi:110711821|homeobox-leucine zipper protein	XP_021745941.1	0	homeobox-leucine zipper protein REVOLUTA-like [Chenopodium quinoa]
miR166e-3p	XM_021894193.1	3	NA	1.5	NA	XM_021894193.1	-	K09338|1|0.0e+00|1523.1|mesc:110626538|homeobox-leucine zipper protein	XP_010691423.1	0	PREDICTED: homeobox-leucine zipper protein ATHB-15 isoform X1 [Beta vulgaris subsp. vulgaris]
miR166e-3p	XM_021909638.1	3	NA	1.5	NA	XM_021909638.1	-	K09338|1|0.0e+00|1521.5|mesc:110626538|homeobox-leucine zipper protein	XP_010691423.1	0	PREDICTED: homeobox-leucine zipper protein ATHB-15 isoform X1 [Beta vulgaris subsp. vulgaris]
miR166e-3p	XM_021917625.1	3.5	NA	1.5	NA	XM_021917625.1	GO:0005634,GO:0003677,GO:0008289,	K09338|1|0.0e+00|1689.9|cqi:110737279|homeobox-leucine zipper protein	XP_021773317.1	0	homeobox-leucine zipper protein REVOLUTA-like [Chenopodium quinoa]
miR166g-3p	XM_021881599.1	2.5	NA	1.2	NA	XM_021881599.1	-	K09338|1|0.0e+00|1632.8|bvg:104885558|homeobox-leucine zipper protein	XP_010668539.1	0	PREDICTED: homeobox-leucine zipper protein ATHB-8 [Beta vulgaris subsp. vulgaris]
miR166g-3p	XM_021881600.1	2.5	NA	1.2	NA	XM_021881600.1	-	K09338|1|0.0e+00|1632.8|bvg:104885558|homeobox-leucine zipper protein	XP_010668539.1	0	PREDICTED: homeobox-leucine zipper protein ATHB-8 [Beta vulgaris subsp. vulgaris]
miR166g-3p	XM_021883445.1	2.5	NA	1.2	NA	XM_021883445.1	-	K09338|1|0.0e+00|1637.9|bvg:104885558|homeobox-leucine zipper protein	XP_010668539.1	0	PREDICTED: homeobox-leucine zipper protein ATHB-8 [Beta vulgaris subsp. vulgaris]
miR166g-3p	XM_021883446.1	2.5	NA	1.2	NA	XM_021883446.1	-	K09338|1|0.0e+00|1637.9|bvg:104885558|homeobox-leucine zipper protein	XP_010668539.1	0	PREDICTED: homeobox-leucine zipper protein ATHB-8 [Beta vulgaris subsp. vulgaris]
miR166g-3p	XM_021890249.1	3	NA	1.8	NA	XM_021890249.1	GO:0005634,GO:0003677,GO:0008289,	K09338|1|0.0e+00|1690.6|cqi:110711821|homeobox-leucine zipper protein	XP_021745941.1	0	homeobox-leucine zipper protein REVOLUTA-like [Chenopodium quinoa]
miR166g-3p	XM_021894193.1	2.5	NA	1.2	NA	XM_021894193.1	-	K09338|1|0.0e+00|1523.1|mesc:110626538|homeobox-leucine zipper protein	XP_010691423.1	0	PREDICTED: homeobox-leucine zipper protein ATHB-15 isoform X1 [Beta vulgaris subsp. vulgaris]
miR166g-3p	XM_021909638.1	2.5	NA	1.2	NA	XM_021909638.1	-	K09338|1|0.0e+00|1521.5|mesc:110626538|homeobox-leucine zipper protein	XP_010691423.1	0	PREDICTED: homeobox-leucine zipper protein ATHB-15 isoform X1 [Beta vulgaris subsp. vulgaris]
miR166g-3p	XM_021917625.1	3	NA	1.8	NA	XM_021917625.1	GO:0005634,GO:0003677,GO:0008289,	K09338|1|0.0e+00|1689.9|cqi:110737279|homeobox-leucine zipper protein	XP_021773317.1	0	homeobox-leucine zipper protein REVOLUTA-like [Chenopodium quinoa]
miR166h-3p	XM_021881599.1	1.5	NA	0.8	NA	XM_021881599.1	-	K09338|1|0.0e+00|1632.8|bvg:104885558|homeobox-leucine zipper protein	XP_010668539.1	0	PREDICTED: homeobox-leucine zipper protein ATHB-8 [Beta vulgaris subsp. vulgaris]
miR166h-3p	XM_021881600.1	1.5	NA	0.8	NA	XM_021881600.1	-	K09338|1|0.0e+00|1632.8|bvg:104885558|homeobox-leucine zipper protein	XP_010668539.1	0	PREDICTED: homeobox-leucine zipper protein ATHB-8 [Beta vulgaris subsp. vulgaris]
miR166h-3p	XM_021883445.1	1.5	NA	0.8	NA	XM_021883445.1	-	K09338|1|0.0e+00|1637.9|bvg:104885558|homeobox-leucine zipper protein	XP_010668539.1	0	PREDICTED: homeobox-leucine zipper protein ATHB-8 [Beta vulgaris subsp. vulgaris]
miR166h-3p	XM_021883446.1	1.5	NA	0.8	NA	XM_021883446.1	-	K09338|1|0.0e+00|1637.9|bvg:104885558|homeobox-leucine zipper protein	XP_010668539.1	0	PREDICTED: homeobox-leucine zipper protein ATHB-8 [Beta vulgaris subsp. vulgaris]
miR166h-3p	XM_021886386.1	3.5	NA	2.2	NA	XM_021886386.1	GO:0000139,GO:0016021,GO:0000139,GO:0016021,GO:0008378,GO:0008378,GO:0006486,GO:0006486,	K20855|1|6.3e-198|692.6|cqi:110708290|beta-1,3-galactosyltransferase 1/2/3/4/5/7/8 [EC:2.4.1.-]	XP_021742078.1	3.3e-197	beta-1,3-galactosyltransferase 7-like [Chenopodium quinoa]
miR166h-3p	XM_021886388.1	3.5	NA	2.2	NA	XM_021886388.1	GO:0000139,GO:0016021,GO:0008378,GO:0006486,	K20855|1|6.1e-198|692.6|cqi:110708290|beta-1,3-galactosyltransferase 1/2/3/4/5/7/8 [EC:2.4.1.-]	XP_021742078.1	3.3e-197	beta-1,3-galactosyltransferase 7-like [Chenopodium quinoa]
miR166h-3p	XM_021890249.1	2	NA	1.2	NA	XM_021890249.1	GO:0005634,GO:0003677,GO:0008289,	K09338|1|0.0e+00|1690.6|cqi:110711821|homeobox-leucine zipper protein	XP_021745941.1	0	homeobox-leucine zipper protein REVOLUTA-like [Chenopodium quinoa]
miR166h-3p	XM_021894193.1	1.5	NA	0.8	NA	XM_021894193.1	-	K09338|1|0.0e+00|1523.1|mesc:110626538|homeobox-leucine zipper protein	XP_010691423.1	0	PREDICTED: homeobox-leucine zipper protein ATHB-15 isoform X1 [Beta vulgaris subsp. vulgaris]
miR166h-3p	XM_021909638.1	1.5	NA	0.8	NA	XM_021909638.1	-	K09338|1|0.0e+00|1521.5|mesc:110626538|homeobox-leucine zipper protein	XP_010691423.1	0	PREDICTED: homeobox-leucine zipper protein ATHB-15 isoform X1 [Beta vulgaris subsp. vulgaris]
miR166h-3p	XM_021917625.1	2	NA	1.2	NA	XM_021917625.1	GO:0005634,GO:0003677,GO:0008289,	K09338|1|0.0e+00|1689.9|cqi:110737279|homeobox-leucine zipper protein	XP_021773317.1	0	homeobox-leucine zipper protein REVOLUTA-like [Chenopodium quinoa]
miR166h-3p_1	XM_021913700.1	3.5	NA	2.5	NA	XM_021913700.1	-	K22827|1|5.9e-295|1015.8|cqi:110733630|calcium uptake protein 1, mitochondrial	XP_021769392.1	3.1e-294	calcium uptake protein, mitochondrial-like [Chenopodium quinoa]
miR166h-5p	XM_021869718.1	2.5	NA	2.2	NA	XM_021869718.1	-	K04730|1|0.0e+00|1345.1|cqi:110692681|interleukin-1 receptor-associated kinase 1 [EC:2.7.11.1]	XP_021725410.1	0	receptor kinase-like protein Xa21 [Chenopodium quinoa]
miR166h-5p	XM_021903005.1	2.5	NA	2.2	NA	XM_021903005.1	-	K04730|1|2.0e-277|957.6|cqi:110692681|interleukin-1 receptor-associated kinase 1 [EC:2.7.11.1]	XP_021725410.1	1.1e-276	receptor kinase-like protein Xa21 [Chenopodium quinoa]
miR166k	XM_021881599.1	1.5	NA	0.8	NA	XM_021881599.1	-	K09338|1|0.0e+00|1632.8|bvg:104885558|homeobox-leucine zipper protein	XP_010668539.1	0	PREDICTED: homeobox-leucine zipper protein ATHB-8 [Beta vulgaris subsp. vulgaris]
miR166k	XM_021881600.1	1.5	NA	0.8	NA	XM_021881600.1	-	K09338|1|0.0e+00|1632.8|bvg:104885558|homeobox-leucine zipper protein	XP_010668539.1	0	PREDICTED: homeobox-leucine zipper protein ATHB-8 [Beta vulgaris subsp. vulgaris]
miR166k	XM_021883445.1	1.5	NA	0.8	NA	XM_021883445.1	-	K09338|1|0.0e+00|1637.9|bvg:104885558|homeobox-leucine zipper protein	XP_010668539.1	0	PREDICTED: homeobox-leucine zipper protein ATHB-8 [Beta vulgaris subsp. vulgaris]
miR166k	XM_021883446.1	1.5	NA	0.8	NA	XM_021883446.1	-	K09338|1|0.0e+00|1637.9|bvg:104885558|homeobox-leucine zipper protein	XP_010668539.1	0	PREDICTED: homeobox-leucine zipper protein ATHB-8 [Beta vulgaris subsp. vulgaris]
miR166k	XM_021890249.1	2	NA	1.2	NA	XM_021890249.1	GO:0005634,GO:0003677,GO:0008289,	K09338|1|0.0e+00|1690.6|cqi:110711821|homeobox-leucine zipper protein	XP_021745941.1	0	homeobox-leucine zipper protein REVOLUTA-like [Chenopodium quinoa]
miR166k	XM_021894193.1	1.5	NA	0.8	NA	XM_021894193.1	-	K09338|1|0.0e+00|1523.1|mesc:110626538|homeobox-leucine zipper protein	XP_010691423.1	0	PREDICTED: homeobox-leucine zipper protein ATHB-15 isoform X1 [Beta vulgaris subsp. vulgaris]
miR166k	XM_021909638.1	1.5	NA	0.8	NA	XM_021909638.1	-	K09338|1|0.0e+00|1521.5|mesc:110626538|homeobox-leucine zipper protein	XP_010691423.1	0	PREDICTED: homeobox-leucine zipper protein ATHB-15 isoform X1 [Beta vulgaris subsp. vulgaris]
miR166k	XM_021917625.1	2	NA	1.2	NA	XM_021917625.1	GO:0005634,GO:0003677,GO:0008289,	K09338|1|0.0e+00|1689.9|cqi:110737279|homeobox-leucine zipper protein	XP_021773317.1	0	homeobox-leucine zipper protein REVOLUTA-like [Chenopodium quinoa]
miR166m_2	XM_021881599.1	2	NA	1	NA	XM_021881599.1	-	K09338|1|0.0e+00|1632.8|bvg:104885558|homeobox-leucine zipper protein	XP_010668539.1	0	PREDICTED: homeobox-leucine zipper protein ATHB-8 [Beta vulgaris subsp. vulgaris]
miR166m_2	XM_021881600.1	2	NA	1	NA	XM_021881600.1	-	K09338|1|0.0e+00|1632.8|bvg:104885558|homeobox-leucine zipper protein	XP_010668539.1	0	PREDICTED: homeobox-leucine zipper protein ATHB-8 [Beta vulgaris subsp. vulgaris]
miR166m_2	XM_021883445.1	2	NA	1	NA	XM_021883445.1	-	K09338|1|0.0e+00|1637.9|bvg:104885558|homeobox-leucine zipper protein	XP_010668539.1	0	PREDICTED: homeobox-leucine zipper protein ATHB-8 [Beta vulgaris subsp. vulgaris]
miR166m_2	XM_021883446.1	2	NA	1	NA	XM_021883446.1	-	K09338|1|0.0e+00|1637.9|bvg:104885558|homeobox-leucine zipper protein	XP_010668539.1	0	PREDICTED: homeobox-leucine zipper protein ATHB-8 [Beta vulgaris subsp. vulgaris]
miR166m_2	XM_021886386.1	3	NA	2	NA	XM_021886386.1	GO:0000139,GO:0016021,GO:0000139,GO:0016021,GO:0008378,GO:0008378,GO:0006486,GO:0006486,	K20855|1|6.3e-198|692.6|cqi:110708290|beta-1,3-galactosyltransferase 1/2/3/4/5/7/8 [EC:2.4.1.-]	XP_021742078.1	3.3e-197	beta-1,3-galactosyltransferase 7-like [Chenopodium quinoa]
miR166m_2	XM_021886388.1	3	NA	2	NA	XM_021886388.1	GO:0000139,GO:0016021,GO:0008378,GO:0006486,	K20855|1|6.1e-198|692.6|cqi:110708290|beta-1,3-galactosyltransferase 1/2/3/4/5/7/8 [EC:2.4.1.-]	XP_021742078.1	3.3e-197	beta-1,3-galactosyltransferase 7-like [Chenopodium quinoa]
miR166m_2	XM_021890249.1	2.5	NA	1.5	NA	XM_021890249.1	GO:0005634,GO:0003677,GO:0008289,	K09338|1|0.0e+00|1690.6|cqi:110711821|homeobox-leucine zipper protein	XP_021745941.1	0	homeobox-leucine zipper protein REVOLUTA-like [Chenopodium quinoa]
miR166m_2	XM_021894193.1	2	NA	1	NA	XM_021894193.1	-	K09338|1|0.0e+00|1523.1|mesc:110626538|homeobox-leucine zipper protein	XP_010691423.1	0	PREDICTED: homeobox-leucine zipper protein ATHB-15 isoform X1 [Beta vulgaris subsp. vulgaris]
miR166m_2	XM_021909638.1	2	NA	1	NA	XM_021909638.1	-	K09338|1|0.0e+00|1521.5|mesc:110626538|homeobox-leucine zipper protein	XP_010691423.1	0	PREDICTED: homeobox-leucine zipper protein ATHB-15 isoform X1 [Beta vulgaris subsp. vulgaris]
miR166m_2	XM_021917625.1	2.5	NA	1.5	NA	XM_021917625.1	GO:0005634,GO:0003677,GO:0008289,	K09338|1|0.0e+00|1689.9|cqi:110737279|homeobox-leucine zipper protein	XP_021773317.1	0	homeobox-leucine zipper protein REVOLUTA-like [Chenopodium quinoa]
miR166u	XM_021913700.1	2.5	NA	2	NA	XM_021913700.1	-	K22827|1|5.9e-295|1015.8|cqi:110733630|calcium uptake protein 1, mitochondrial	XP_021769392.1	3.1e-294	calcium uptake protein, mitochondrial-like [Chenopodium quinoa]
miR167a-5p	XM_021884773.1	3.5	NA	1.8	NA	XM_021884773.1	-	K05715|1|3.2e-229|797.7|han:110904278|2-phosphoglycerate kinase [EC:2.7.2.-]	XP_021740465.1	0	P-loop NTPase domain-containing protein LPA1 homolog 2-like [Chenopodium quinoa]
miR167a-5p	XM_021911394.1	3.5	NA	2	NA	XM_021911394.1	-	-	XP_021767086.1	3.2e-221	protein PAIR1-like isoform X2 [Chenopodium quinoa]
miR167a-5p	XR_002512788.1	2	NA	1	NA	XR_002512788.1	-	-	-	-	-
miR167a_2	XR_002512788.1	2.5	NA	1.2	NA	XR_002512788.1	-	-	-	-	-
miR167c_1	XM_021911394.1	2.5	NA	1.5	NA	XM_021911394.1	-	-	XP_021767086.1	3.2e-221	protein PAIR1-like isoform X2 [Chenopodium quinoa]
miR167c_1	XR_002512788.1	3	NA	1.5	NA	XR_002512788.1	-	-	-	-	-
miR167d-5p	XM_021911394.1	3.5	NA	2	NA	XM_021911394.1	-	-	XP_021767086.1	3.2e-221	protein PAIR1-like isoform X2 [Chenopodium quinoa]
miR167d-5p	XR_002512788.1	2.5	NA	1.2	NA	XR_002512788.1	-	-	-	-	-
miR167d_1	XM_021863533.1	3	NA	2.5	NA	XM_021863533.1	-	K16253|1|7.6e-96|353.2|cqi:110737746|DNA-directed RNA polymerase IV and V subunit 7	XP_021773778.1	4e-95	DNA-directed RNA polymerase V subunit 7-like [Chenopodium quinoa]
miR167d_1	XM_021911394.1	2.5	NA	1.5	NA	XM_021911394.1	-	-	XP_021767086.1	3.2e-221	protein PAIR1-like isoform X2 [Chenopodium quinoa]
miR167d_1	XR_002512788.1	2	NA	1	NA	XR_002512788.1	-	-	-	-	-
miR168_1	XR_002511081.1	0	NA	0	NA	XR_002511081.1	-	K16912|1|1.0e-08|64.7|cqi:110736312|ribosomal biogenesis protein LAS1	XP_021772204.1	5.6e-08	uncharacterized protein LOC110736312 isoform X3 [Chenopodium quinoa]
miR168a-3p	XM_021894998.1	2	NA	1	NA	XM_021894998.1	-	K01179|1|3.3e-07|60.5|cre:CHLREDRAFT_142120|endoglucanase [EC:3.2.1.4]!K02184|4|9.6e-07|58.9|adu:107463462|formin 2	XP_021750690.1	3.5e-148	uncharacterized protein LOC110716385 [Chenopodium quinoa]
miR168a-3p	XR_002510478.1	2	NA	1	NA	XR_002510478.1	-	K01179|1|3.2e-07|60.5|cre:CHLREDRAFT_142120|endoglucanase [EC:3.2.1.4]!K02184|4|9.4e-07|58.9|adu:107463462|formin 2	XP_021750690.1	3.4e-148	uncharacterized protein LOC110716385 [Chenopodium quinoa]
miR169	XM_021859348.1	3	NA	2	NA	XM_021859348.1	-	K08064|1|3.7e-186|654.1|cqi:110683013|nuclear transcription factor Y, alpha	XP_021715040.1	2e-185	nuclear transcription factor Y subunit A-7-like [Chenopodium quinoa]
miR169	XM_021859349.1	3	NA	2	NA	XM_021859349.1	-	K08064|1|3.0e-186|654.1|cqi:110683013|nuclear transcription factor Y, alpha	XP_021715040.1	1.6e-185	nuclear transcription factor Y subunit A-7-like [Chenopodium quinoa]
miR169	XM_021860810.1	3	NA	2	NA	XM_021860810.1	-	K08064|1|6.5e-165|583.6|cqi:110684358|nuclear transcription factor Y, alpha	XP_021716502.1	3.4e-164	nuclear transcription factor Y subunit A-3-like [Chenopodium quinoa]
miR169	XM_021864799.1	3	NA	2	NA	XM_021864799.1	-	K08064|1|3.6e-163|577.8|cqi:110688113|nuclear transcription factor Y, alpha	XP_021720491.1	1.9e-162	nuclear transcription factor Y subunit A-3-like [Chenopodium quinoa]
miR169	XM_021864800.1	3	NA	2	NA	XM_021864800.1	-	K08064|1|5.8e-163|577.8|cqi:110688113|nuclear transcription factor Y, alpha	XP_021720491.1	3.1e-162	nuclear transcription factor Y subunit A-3-like [Chenopodium quinoa]
miR169	XM_021894366.1	2	NA	1.5	NA	XM_021894366.1	-	K08064|1|2.2e-185|651.4|cqi:110715758|nuclear transcription factor Y, alpha	XP_021750058.1	1.2e-184	nuclear transcription factor Y subunit A-7-like isoform X1 [Chenopodium quinoa]
miR169	XM_021894367.1	2	NA	1.5	NA	XM_021894367.1	-	K08064|1|5.1e-176|620.2|cqi:110715758|nuclear transcription factor Y, alpha	XP_021750058.1	2.7e-175	nuclear transcription factor Y subunit A-7-like isoform X1 [Chenopodium quinoa]
miR169_2	XM_021859348.1	0	NA	0	NA	XM_021859348.1	-	K08064|1|3.7e-186|654.1|cqi:110683013|nuclear transcription factor Y, alpha	XP_021715040.1	2e-185	nuclear transcription factor Y subunit A-7-like [Chenopodium quinoa]
miR169_2	XM_021859349.1	0	NA	0	NA	XM_021859349.1	-	K08064|1|3.0e-186|654.1|cqi:110683013|nuclear transcription factor Y, alpha	XP_021715040.1	1.6e-185	nuclear transcription factor Y subunit A-7-like [Chenopodium quinoa]
miR169_2	XM_021883579.1	1	NA	0.5	NA	XM_021883579.1	-	K08064|1|1.9e-195|684.9|cqi:110705677|nuclear transcription factor Y, alpha	XP_021739271.1	1e-194	nuclear transcription factor Y subunit A-4-like isoform X1 [Chenopodium quinoa]
miR169_2	XM_021883580.1	1	NA	0.5	NA	XM_021883580.1	-	K08064|1|1.8e-193|678.3|cqi:110705677|nuclear transcription factor Y, alpha	XP_021739272.1	3.9e-194	nuclear transcription factor Y subunit A-4-like isoform X2 [Chenopodium quinoa]
miR169_2	XM_021883581.1	1	NA	0.5	NA	XM_021883581.1	-	K08064|1|6.8e-193|676.4|cqi:110705677|nuclear transcription factor Y, alpha	XP_021739273.1	1.1e-193	nuclear transcription factor Y subunit A-4-like isoform X3 [Chenopodium quinoa]
miR169_2	XM_021894366.1	0.5	NA	0.2	NA	XM_021894366.1	-	K08064|1|2.2e-185|651.4|cqi:110715758|nuclear transcription factor Y, alpha	XP_021750058.1	1.2e-184	nuclear transcription factor Y subunit A-7-like isoform X1 [Chenopodium quinoa]
miR169_2	XM_021894367.1	0.5	NA	0.2	NA	XM_021894367.1	-	K08064|1|5.1e-176|620.2|cqi:110715758|nuclear transcription factor Y, alpha	XP_021750058.1	2.7e-175	nuclear transcription factor Y subunit A-7-like isoform X1 [Chenopodium quinoa]
miR169_2	XM_021920326.1	3.5	NA	2.5	NA	XM_021920326.1	-	K00588|1|2.5e-45|185.7|sita:101753568|caffeoyl-CoA O-methyltransferase [EC:2.1.1.104]!K18883|2|4.3e-45|184.9|sita:101753161|tricin synthase [EC:2.1.1.175]	XP_021776018.1	9.6e-160	uncharacterized protein LOC110739844 [Chenopodium quinoa]
miR169_2	XM_021920327.1	3.5	NA	2.5	NA	XM_021920327.1	-	K00588|1|2.7e-45|185.7|sita:101753568|caffeoyl-CoA O-methyltransferase [EC:2.1.1.104]!K18883|2|4.5e-45|184.9|sita:101753161|tricin synthase [EC:2.1.1.175]	XP_021776018.1	1e-159	uncharacterized protein LOC110739844 [Chenopodium quinoa]
miR169_2	XR_002511881.1	1	NA	0.5	NA	XR_002511881.1	-	K08064|1|2.0e-48|195.7|cqi:110705677|nuclear transcription factor Y, alpha	XP_021739273.1	1e-47	nuclear transcription factor Y subunit A-4-like isoform X3 [Chenopodium quinoa]
miR169_2	XR_002512657.1	1	NA	0.5	NA	XR_002512657.1	-	K08064|1|1.6e-48|196.1|cqi:110705677|nuclear transcription factor Y, alpha	XP_021739273.1	8.4e-48	nuclear transcription factor Y subunit A-4-like isoform X3 [Chenopodium quinoa]
miR169a-3p_3	XM_021864033.1	3	NA	2	NA	XM_021864033.1	GO:0009505,GO:0009506,GO:0005507,GO:0016722,	K19791|1|4.1e-216|753.8|pop:7462059|iron transport multicopper oxidase	XP_021853055.1	3.6e-295	L-ascorbate oxidase homolog isoform X2 [Spinacia oleracea]
miR169a-3p_3	XM_021864034.1	3	NA	2	NA	XM_021864034.1	GO:0009505,GO:0009506,GO:0005507,GO:0016722,	K19791|1|1.5e-219|765.8|pop:7462059|iron transport multicopper oxidase	XP_021853054.1	6.2e-304	L-ascorbate oxidase homolog isoform X1 [Spinacia oleracea]
miR169a-3p_3	XM_021882413.1	2.5	NA	1.2	NA	XM_021882413.1	-	K02355|1|0.0e+00|1441.4|bvg:104892065|elongation factor G	XP_021738105.1	0	elongation factor G-2, chloroplastic-like [Chenopodium quinoa]
miR169a-3p_3	XM_021911169.1	3	NA	2	NA	XM_021911169.1	GO:0009505,GO:0009506,GO:0005507,GO:0016722,	K19791|1|7.7e-215|749.6|pop:7462059|iron transport multicopper oxidase	XP_021853055.1	1.2e-293	L-ascorbate oxidase homolog isoform X2 [Spinacia oleracea]
miR169a-3p_3	XM_021911170.1	3	NA	2	NA	XM_021911170.1	GO:0009505,GO:0009506,GO:0005507,GO:0016722,	K19791|1|2.1e-218|761.5|pop:7462059|iron transport multicopper oxidase	XP_021853054.1	1.5e-302	L-ascorbate oxidase homolog isoform X1 [Spinacia oleracea]
miR169a-3p_3	XM_021912719.1	2.5	NA	1.2	NA	XM_021912719.1	-	K02355|1|0.0e+00|1539.6|cqi:110732731|elongation factor G	XP_021768411.1	0	elongation factor G-2, chloroplastic [Chenopodium quinoa]
miR169b-5p	XM_021859348.1	3	NA	2	NA	XM_021859348.1	-	K08064|1|3.7e-186|654.1|cqi:110683013|nuclear transcription factor Y, alpha	XP_021715040.1	2e-185	nuclear transcription factor Y subunit A-7-like [Chenopodium quinoa]
miR169b-5p	XM_021859349.1	3	NA	2	NA	XM_021859349.1	-	K08064|1|3.0e-186|654.1|cqi:110683013|nuclear transcription factor Y, alpha	XP_021715040.1	1.6e-185	nuclear transcription factor Y subunit A-7-like [Chenopodium quinoa]
miR169b-5p	XM_021873301.1	3	NA	2	NA	XM_021873301.1	-	K08064|1|5.5e-178|627.1|cqi:110696037|nuclear transcription factor Y, alpha	XP_021728993.1	2.9e-177	nuclear transcription factor Y subunit A-1-like isoform X1 [Chenopodium quinoa]
miR169b-5p	XM_021873302.1	3	NA	2	NA	XM_021873302.1	-	K08064|1|5.6e-178|627.1|cqi:110696037|nuclear transcription factor Y, alpha	XP_021728993.1	3e-177	nuclear transcription factor Y subunit A-1-like isoform X1 [Chenopodium quinoa]
miR169b-5p	XM_021873303.1	3	NA	2	NA	XM_021873303.1	-	K08064|1|1.0e-171|606.3|cqi:110696037|nuclear transcription factor Y, alpha	XP_021728995.1	4.3e-173	nuclear transcription factor Y subunit A-1-like isoform X2 [Chenopodium quinoa]
miR169b-5p	XM_021894366.1	3.5	NA	2.2	NA	XM_021894366.1	-	K08064|1|2.2e-185|651.4|cqi:110715758|nuclear transcription factor Y, alpha	XP_021750058.1	1.2e-184	nuclear transcription factor Y subunit A-7-like isoform X1 [Chenopodium quinoa]
miR169b-5p	XM_021894367.1	3.5	NA	2.2	NA	XM_021894367.1	-	K08064|1|5.1e-176|620.2|cqi:110715758|nuclear transcription factor Y, alpha	XP_021750058.1	2.7e-175	nuclear transcription factor Y subunit A-7-like isoform X1 [Chenopodium quinoa]
miR169b-5p	XM_021916389.1	3	NA	2	NA	XM_021916389.1	-	K08064|1|5.9e-179|630.2|cqi:110736224|nuclear transcription factor Y, alpha	XP_021772081.1	3.1e-178	nuclear transcription factor Y subunit A-1-like isoform X1 [Chenopodium quinoa]
miR169b-5p	XM_021916390.1	3	NA	2	NA	XM_021916390.1	-	K08064|1|6.0e-179|630.2|cqi:110736224|nuclear transcription factor Y, alpha	XP_021772081.1	3.2e-178	nuclear transcription factor Y subunit A-1-like isoform X1 [Chenopodium quinoa]
miR169b-5p	XM_021916391.1	3	NA	2	NA	XM_021916391.1	-	K08064|1|6.3e-179|630.2|cqi:110736224|nuclear transcription factor Y, alpha	XP_021772081.1	3.4e-178	nuclear transcription factor Y subunit A-1-like isoform X1 [Chenopodium quinoa]
miR169b-5p	XM_021916392.1	3	NA	2	NA	XM_021916392.1	-	K08064|1|5.8e-179|630.2|cqi:110736224|nuclear transcription factor Y, alpha	XP_021772081.1	3.1e-178	nuclear transcription factor Y subunit A-1-like isoform X1 [Chenopodium quinoa]
miR169b-5p	XM_021916393.1	3	NA	2	NA	XM_021916393.1	-	K08064|1|1.1e-172|609.4|cqi:110736224|nuclear transcription factor Y, alpha	XP_021772085.1	4.6e-174	nuclear transcription factor Y subunit A-1-like isoform X2 [Chenopodium quinoa]
miR169b-5p	XM_021920326.1	2.5	NA	2.5	NA	XM_021920326.1	-	K00588|1|2.5e-45|185.7|sita:101753568|caffeoyl-CoA O-methyltransferase [EC:2.1.1.104]!K18883|2|4.3e-45|184.9|sita:101753161|tricin synthase [EC:2.1.1.175]	XP_021776018.1	9.6e-160	uncharacterized protein LOC110739844 [Chenopodium quinoa]
miR169b-5p	XM_021920327.1	2.5	NA	2.5	NA	XM_021920327.1	-	K00588|1|2.7e-45|185.7|sita:101753568|caffeoyl-CoA O-methyltransferase [EC:2.1.1.104]!K18883|2|4.5e-45|184.9|sita:101753161|tricin synthase [EC:2.1.1.175]	XP_021776018.1	1e-159	uncharacterized protein LOC110739844 [Chenopodium quinoa]
miR169c-3p_3	XM_021882413.1	3.5	NA	1.8	NA	XM_021882413.1	-	K02355|1|0.0e+00|1441.4|bvg:104892065|elongation factor G	XP_021738105.1	0	elongation factor G-2, chloroplastic-like [Chenopodium quinoa]
miR169c-3p_3	XM_021912719.1	3.5	NA	1.8	NA	XM_021912719.1	-	K02355|1|0.0e+00|1539.6|cqi:110732731|elongation factor G	XP_021768411.1	0	elongation factor G-2, chloroplastic [Chenopodium quinoa]
miR169d-5p_1	XM_021859348.1	2	NA	1.5	NA	XM_021859348.1	-	K08064|1|3.7e-186|654.1|cqi:110683013|nuclear transcription factor Y, alpha	XP_021715040.1	2e-185	nuclear transcription factor Y subunit A-7-like [Chenopodium quinoa]
miR169d-5p_1	XM_021859349.1	2	NA	1.5	NA	XM_021859349.1	-	K08064|1|3.0e-186|654.1|cqi:110683013|nuclear transcription factor Y, alpha	XP_021715040.1	1.6e-185	nuclear transcription factor Y subunit A-7-like [Chenopodium quinoa]
miR169d-5p_1	XM_021860810.1	2	NA	1.5	NA	XM_021860810.1	-	K08064|1|6.5e-165|583.6|cqi:110684358|nuclear transcription factor Y, alpha	XP_021716502.1	3.4e-164	nuclear transcription factor Y subunit A-3-like [Chenopodium quinoa]
miR169d-5p_1	XM_021864799.1	2	NA	1.5	NA	XM_021864799.1	-	K08064|1|3.6e-163|577.8|cqi:110688113|nuclear transcription factor Y, alpha	XP_021720491.1	1.9e-162	nuclear transcription factor Y subunit A-3-like [Chenopodium quinoa]
miR169d-5p_1	XM_021864800.1	2	NA	1.5	NA	XM_021864800.1	-	K08064|1|5.8e-163|577.8|cqi:110688113|nuclear transcription factor Y, alpha	XP_021720491.1	3.1e-162	nuclear transcription factor Y subunit A-3-like [Chenopodium quinoa]
miR169d-5p_1	XM_021873301.1	3.5	NA	2.2	NA	XM_021873301.1	-	K08064|1|5.5e-178|627.1|cqi:110696037|nuclear transcription factor Y, alpha	XP_021728993.1	2.9e-177	nuclear transcription factor Y subunit A-1-like isoform X1 [Chenopodium quinoa]
miR169d-5p_1	XM_021873302.1	3.5	NA	2.2	NA	XM_021873302.1	-	K08064|1|5.6e-178|627.1|cqi:110696037|nuclear transcription factor Y, alpha	XP_021728993.1	3e-177	nuclear transcription factor Y subunit A-1-like isoform X1 [Chenopodium quinoa]
miR169d-5p_1	XM_021873303.1	3.5	NA	2.2	NA	XM_021873303.1	-	K08064|1|1.0e-171|606.3|cqi:110696037|nuclear transcription factor Y, alpha	XP_021728995.1	4.3e-173	nuclear transcription factor Y subunit A-1-like isoform X2 [Chenopodium quinoa]
miR169d-5p_1	XM_021883579.1	3	NA	2	NA	XM_021883579.1	-	K08064|1|1.9e-195|684.9|cqi:110705677|nuclear transcription factor Y, alpha	XP_021739271.1	1e-194	nuclear transcription factor Y subunit A-4-like isoform X1 [Chenopodium quinoa]
miR169d-5p_1	XM_021883580.1	3	NA	2	NA	XM_021883580.1	-	K08064|1|1.8e-193|678.3|cqi:110705677|nuclear transcription factor Y, alpha	XP_021739272.1	3.9e-194	nuclear transcription factor Y subunit A-4-like isoform X2 [Chenopodium quinoa]
miR169d-5p_1	XM_021883581.1	3	NA	2	NA	XM_021883581.1	-	K08064|1|6.8e-193|676.4|cqi:110705677|nuclear transcription factor Y, alpha	XP_021739273.1	1.1e-193	nuclear transcription factor Y subunit A-4-like isoform X3 [Chenopodium quinoa]
miR169d-5p_1	XM_021894366.1	2	NA	1.5	NA	XM_021894366.1	-	K08064|1|2.2e-185|651.4|cqi:110715758|nuclear transcription factor Y, alpha	XP_021750058.1	1.2e-184	nuclear transcription factor Y subunit A-7-like isoform X1 [Chenopodium quinoa]
miR169d-5p_1	XM_021894367.1	2	NA	1.5	NA	XM_021894367.1	-	K08064|1|5.1e-176|620.2|cqi:110715758|nuclear transcription factor Y, alpha	XP_021750058.1	2.7e-175	nuclear transcription factor Y subunit A-7-like isoform X1 [Chenopodium quinoa]
miR169d-5p_1	XM_021916389.1	3.5	NA	2.2	NA	XM_021916389.1	-	K08064|1|5.9e-179|630.2|cqi:110736224|nuclear transcription factor Y, alpha	XP_021772081.1	3.1e-178	nuclear transcription factor Y subunit A-1-like isoform X1 [Chenopodium quinoa]
miR169d-5p_1	XM_021916390.1	3.5	NA	2.2	NA	XM_021916390.1	-	K08064|1|6.0e-179|630.2|cqi:110736224|nuclear transcription factor Y, alpha	XP_021772081.1	3.2e-178	nuclear transcription factor Y subunit A-1-like isoform X1 [Chenopodium quinoa]
miR169d-5p_1	XM_021916391.1	3.5	NA	2.2	NA	XM_021916391.1	-	K08064|1|6.3e-179|630.2|cqi:110736224|nuclear transcription factor Y, alpha	XP_021772081.1	3.4e-178	nuclear transcription factor Y subunit A-1-like isoform X1 [Chenopodium quinoa]
miR169d-5p_1	XM_021916392.1	3.5	NA	2.2	NA	XM_021916392.1	-	K08064|1|5.8e-179|630.2|cqi:110736224|nuclear transcription factor Y, alpha	XP_021772081.1	3.1e-178	nuclear transcription factor Y subunit A-1-like isoform X1 [Chenopodium quinoa]
miR169d-5p_1	XM_021916393.1	3.5	NA	2.2	NA	XM_021916393.1	-	K08064|1|1.1e-172|609.4|cqi:110736224|nuclear transcription factor Y, alpha	XP_021772085.1	4.6e-174	nuclear transcription factor Y subunit A-1-like isoform X2 [Chenopodium quinoa]
miR169d-5p_1	XR_002511881.1	3	NA	2	NA	XR_002511881.1	-	K08064|1|2.0e-48|195.7|cqi:110705677|nuclear transcription factor Y, alpha	XP_021739273.1	1e-47	nuclear transcription factor Y subunit A-4-like isoform X3 [Chenopodium quinoa]
miR169d-5p_1	XR_002512657.1	3	NA	2	NA	XR_002512657.1	-	K08064|1|1.6e-48|196.1|cqi:110705677|nuclear transcription factor Y, alpha	XP_021739273.1	8.4e-48	nuclear transcription factor Y subunit A-4-like isoform X3 [Chenopodium quinoa]
miR169e_3	XM_021859348.1	3	NA	1.5	NA	XM_021859348.1	-	K08064|1|3.7e-186|654.1|cqi:110683013|nuclear transcription factor Y, alpha	XP_021715040.1	2e-185	nuclear transcription factor Y subunit A-7-like [Chenopodium quinoa]
miR169e_3	XM_021859349.1	3	NA	1.5	NA	XM_021859349.1	-	K08064|1|3.0e-186|654.1|cqi:110683013|nuclear transcription factor Y, alpha	XP_021715040.1	1.6e-185	nuclear transcription factor Y subunit A-7-like [Chenopodium quinoa]
miR169e_3	XM_021860810.1	3	NA	2	NA	XM_021860810.1	-	K08064|1|6.5e-165|583.6|cqi:110684358|nuclear transcription factor Y, alpha	XP_021716502.1	3.4e-164	nuclear transcription factor Y subunit A-3-like [Chenopodium quinoa]
miR169e_3	XM_021864799.1	3	NA	2	NA	XM_021864799.1	-	K08064|1|3.6e-163|577.8|cqi:110688113|nuclear transcription factor Y, alpha	XP_021720491.1	1.9e-162	nuclear transcription factor Y subunit A-3-like [Chenopodium quinoa]
miR169e_3	XM_021864800.1	3	NA	2	NA	XM_021864800.1	-	K08064|1|5.8e-163|577.8|cqi:110688113|nuclear transcription factor Y, alpha	XP_021720491.1	3.1e-162	nuclear transcription factor Y subunit A-3-like [Chenopodium quinoa]
miR169e_3	XM_021894366.1	3.5	NA	1.8	NA	XM_021894366.1	-	K08064|1|2.2e-185|651.4|cqi:110715758|nuclear transcription factor Y, alpha	XP_021750058.1	1.2e-184	nuclear transcription factor Y subunit A-7-like isoform X1 [Chenopodium quinoa]
miR169e_3	XM_021894367.1	3.5	NA	1.8	NA	XM_021894367.1	-	K08064|1|5.1e-176|620.2|cqi:110715758|nuclear transcription factor Y, alpha	XP_021750058.1	2.7e-175	nuclear transcription factor Y subunit A-7-like isoform X1 [Chenopodium quinoa]
miR169e_3	XM_021920326.1	3.5	NA	2.5	NA	XM_021920326.1	-	K00588|1|2.5e-45|185.7|sita:101753568|caffeoyl-CoA O-methyltransferase [EC:2.1.1.104]!K18883|2|4.3e-45|184.9|sita:101753161|tricin synthase [EC:2.1.1.175]	XP_021776018.1	9.6e-160	uncharacterized protein LOC110739844 [Chenopodium quinoa]
miR169e_3	XM_021920327.1	3.5	NA	2.5	NA	XM_021920327.1	-	K00588|1|2.7e-45|185.7|sita:101753568|caffeoyl-CoA O-methyltransferase [EC:2.1.1.104]!K18883|2|4.5e-45|184.9|sita:101753161|tricin synthase [EC:2.1.1.175]	XP_021776018.1	1e-159	uncharacterized protein LOC110739844 [Chenopodium quinoa]
miR169f.1	XM_021859348.1	3	NA	2	NA	XM_021859348.1	-	K08064|1|3.7e-186|654.1|cqi:110683013|nuclear transcription factor Y, alpha	XP_021715040.1	2e-185	nuclear transcription factor Y subunit A-7-like [Chenopodium quinoa]
miR169f.1	XM_021859349.1	3	NA	2	NA	XM_021859349.1	-	K08064|1|3.0e-186|654.1|cqi:110683013|nuclear transcription factor Y, alpha	XP_021715040.1	1.6e-185	nuclear transcription factor Y subunit A-7-like [Chenopodium quinoa]
miR169f.1	XM_021860810.1	3	NA	2	NA	XM_021860810.1	-	K08064|1|6.5e-165|583.6|cqi:110684358|nuclear transcription factor Y, alpha	XP_021716502.1	3.4e-164	nuclear transcription factor Y subunit A-3-like [Chenopodium quinoa]
miR169f.1	XM_021864799.1	3	NA	2	NA	XM_021864799.1	-	K08064|1|3.6e-163|577.8|cqi:110688113|nuclear transcription factor Y, alpha	XP_021720491.1	1.9e-162	nuclear transcription factor Y subunit A-3-like [Chenopodium quinoa]
miR169f.1	XM_021864800.1	3	NA	2	NA	XM_021864800.1	-	K08064|1|5.8e-163|577.8|cqi:110688113|nuclear transcription factor Y, alpha	XP_021720491.1	3.1e-162	nuclear transcription factor Y subunit A-3-like [Chenopodium quinoa]
miR169f.1	XM_021894366.1	2	NA	1.5	NA	XM_021894366.1	-	K08064|1|2.2e-185|651.4|cqi:110715758|nuclear transcription factor Y, alpha	XP_021750058.1	1.2e-184	nuclear transcription factor Y subunit A-7-like isoform X1 [Chenopodium quinoa]
miR169f.1	XM_021894367.1	2	NA	1.5	NA	XM_021894367.1	-	K08064|1|5.1e-176|620.2|cqi:110715758|nuclear transcription factor Y, alpha	XP_021750058.1	2.7e-175	nuclear transcription factor Y subunit A-7-like isoform X1 [Chenopodium quinoa]
miR169g	XM_021859348.1	3	NA	2	NA	XM_021859348.1	-	K08064|1|3.7e-186|654.1|cqi:110683013|nuclear transcription factor Y, alpha	XP_021715040.1	2e-185	nuclear transcription factor Y subunit A-7-like [Chenopodium quinoa]
miR169g	XM_021859349.1	3	NA	2	NA	XM_021859349.1	-	K08064|1|3.0e-186|654.1|cqi:110683013|nuclear transcription factor Y, alpha	XP_021715040.1	1.6e-185	nuclear transcription factor Y subunit A-7-like [Chenopodium quinoa]
miR169g	XM_021873301.1	3.5	NA	2.2	NA	XM_021873301.1	-	K08064|1|5.5e-178|627.1|cqi:110696037|nuclear transcription factor Y, alpha	XP_021728993.1	2.9e-177	nuclear transcription factor Y subunit A-1-like isoform X1 [Chenopodium quinoa]
miR169g	XM_021873302.1	3.5	NA	2.2	NA	XM_021873302.1	-	K08064|1|5.6e-178|627.1|cqi:110696037|nuclear transcription factor Y, alpha	XP_021728993.1	3e-177	nuclear transcription factor Y subunit A-1-like isoform X1 [Chenopodium quinoa]
miR169g	XM_021873303.1	3.5	NA	2.2	NA	XM_021873303.1	-	K08064|1|1.0e-171|606.3|cqi:110696037|nuclear transcription factor Y, alpha	XP_021728995.1	4.3e-173	nuclear transcription factor Y subunit A-1-like isoform X2 [Chenopodium quinoa]
miR169g	XM_021894366.1	3.5	NA	2.2	NA	XM_021894366.1	-	K08064|1|2.2e-185|651.4|cqi:110715758|nuclear transcription factor Y, alpha	XP_021750058.1	1.2e-184	nuclear transcription factor Y subunit A-7-like isoform X1 [Chenopodium quinoa]
miR169g	XM_021894367.1	3.5	NA	2.2	NA	XM_021894367.1	-	K08064|1|5.1e-176|620.2|cqi:110715758|nuclear transcription factor Y, alpha	XP_021750058.1	2.7e-175	nuclear transcription factor Y subunit A-7-like isoform X1 [Chenopodium quinoa]
miR169g	XM_021916389.1	3.5	NA	2.2	NA	XM_021916389.1	-	K08064|1|5.9e-179|630.2|cqi:110736224|nuclear transcription factor Y, alpha	XP_021772081.1	3.1e-178	nuclear transcription factor Y subunit A-1-like isoform X1 [Chenopodium quinoa]
miR169g	XM_021916390.1	3.5	NA	2.2	NA	XM_021916390.1	-	K08064|1|6.0e-179|630.2|cqi:110736224|nuclear transcription factor Y, alpha	XP_021772081.1	3.2e-178	nuclear transcription factor Y subunit A-1-like isoform X1 [Chenopodium quinoa]
miR169g	XM_021916391.1	3.5	NA	2.2	NA	XM_021916391.1	-	K08064|1|6.3e-179|630.2|cqi:110736224|nuclear transcription factor Y, alpha	XP_021772081.1	3.4e-178	nuclear transcription factor Y subunit A-1-like isoform X1 [Chenopodium quinoa]
miR169g	XM_021916392.1	3.5	NA	2.2	NA	XM_021916392.1	-	K08064|1|5.8e-179|630.2|cqi:110736224|nuclear transcription factor Y, alpha	XP_021772081.1	3.1e-178	nuclear transcription factor Y subunit A-1-like isoform X1 [Chenopodium quinoa]
miR169g	XM_021916393.1	3.5	NA	2.2	NA	XM_021916393.1	-	K08064|1|1.1e-172|609.4|cqi:110736224|nuclear transcription factor Y, alpha	XP_021772085.1	4.6e-174	nuclear transcription factor Y subunit A-1-like isoform X2 [Chenopodium quinoa]
miR169h-3p_1	XM_021878490.1	3.5	NA	2.2	NA	XM_021878490.1	-	K10352|1|2.1e-105|386.3|mus:103974110|myosin heavy chain!K20283|2|2.3e-19|100.5|cmo:103493020|golgin subfamily A member 4!K10406|3|2.3e-19|100.5|adu:107490360|kinesin family member C2/C3	XP_021734182.1	0	interactor of constitutive active ROPs 3-like [Chenopodium quinoa]
miR169h-3p_1	XM_021878491.1	3.5	NA	2.2	NA	XM_021878491.1	-	K10352|1|2.1e-105|386.3|mus:103974110|myosin heavy chain!K20283|2|2.3e-19|100.5|cmo:103493020|golgin subfamily A member 4!K10406|3|2.3e-19|100.5|adu:107490360|kinesin family member C2/C3	XP_021734182.1	0	interactor of constitutive active ROPs 3-like [Chenopodium quinoa]
miR169h-3p_1	XM_021878492.1	3.5	NA	2.2	NA	XM_021878492.1	-	K10352|1|2.1e-105|386.3|mus:103974110|myosin heavy chain!K20283|2|2.3e-19|100.5|cmo:103493020|golgin subfamily A member 4!K10406|3|2.3e-19|100.5|adu:107490360|kinesin family member C2/C3	XP_021734182.1	0	interactor of constitutive active ROPs 3-like [Chenopodium quinoa]
miR169h-3p_1	XM_021890240.1	3.5	NA	2.2	NA	XM_021890240.1	-	K10352|1|1.2e-107|393.7|mus:103974110|myosin heavy chain!K20283|2|6.0e-22|109.0|pmum:103337674|golgin subfamily A member 4	XP_021745932.1	0	interactor of constitutive active ROPs 3-like [Chenopodium quinoa]
miR169h-3p_1	XM_021890241.1	3.5	NA	2.2	NA	XM_021890241.1	-	K10352|1|1.3e-107|393.7|mus:103974110|myosin heavy chain!K20283|2|6.3e-22|109.0|pmum:103337674|golgin subfamily A member 4	XP_021745932.1	0	interactor of constitutive active ROPs 3-like [Chenopodium quinoa]
miR169h-3p_1	XM_021890242.1	3.5	NA	2.2	NA	XM_021890242.1	-	K10352|1|1.2e-107|393.7|mus:103974110|myosin heavy chain!K20283|2|5.9e-22|109.0|pmum:103337674|golgin subfamily A member 4	XP_021745932.1	0	interactor of constitutive active ROPs 3-like [Chenopodium quinoa]
miR169h-3p_1	XM_021890243.1	3.5	NA	2.2	NA	XM_021890243.1	-	K10352|1|1.2e-107|393.7|mus:103974110|myosin heavy chain!K20283|2|6.0e-22|109.0|pmum:103337674|golgin subfamily A member 4	XP_021745932.1	0	interactor of constitutive active ROPs 3-like [Chenopodium quinoa]
miR169h-3p_1	XM_021890244.1	3.5	NA	2.2	NA	XM_021890244.1	-	K10352|1|1.3e-107|393.7|mus:103974110|myosin heavy chain!K20283|2|6.3e-22|109.0|pmum:103337674|golgin subfamily A member 4	XP_021745932.1	0	interactor of constitutive active ROPs 3-like [Chenopodium quinoa]
miR169h-3p_1	XM_021890245.1	3.5	NA	2.2	NA	XM_021890245.1	-	K10352|1|1.2e-107|393.7|mus:103974110|myosin heavy chain!K20283|2|6.0e-22|109.0|pmum:103337674|golgin subfamily A member 4	XP_021745932.1	0	interactor of constitutive active ROPs 3-like [Chenopodium quinoa]
miR169h-3p_1	XM_021894157.1	3	NA	2	NA	XM_021894157.1	-	K13096|1|1.9e-247|857.4|cqi:110715573|splicing factor 4	XP_021749849.1	9.9e-247	SURP and G-patch domain-containing protein 1-like protein [Chenopodium quinoa]
miR169h-3p_1	XM_021894158.1	3	NA	2	NA	XM_021894158.1	-	K13096|1|1.8e-247|857.4|cqi:110715573|splicing factor 4	XP_021749849.1	9.6e-247	SURP and G-patch domain-containing protein 1-like protein [Chenopodium quinoa]
miR169h-3p_1	XM_021894159.1	3	NA	2	NA	XM_021894159.1	-	K13096|1|1.8e-247|857.4|cqi:110715573|splicing factor 4	XP_021749849.1	9.4e-247	SURP and G-patch domain-containing protein 1-like protein [Chenopodium quinoa]
miR169h-3p_1	XM_021895342.1	3.5	NA	2.2	NA	XM_021895342.1	-	K12251|1|5.6e-33|146.0|lja:Lj0g3v0164619.1|N-carbamoylputrescine amidase [EC:3.5.1.53]!K01426|2|1.3e-29|134.8|vvi:100248659|amidase [EC:3.5.1.4]!K04733|3|4.0e-23|113.2|ghi:107887522|interleukin-1 receptor-associated kinase 4 [EC:2.7.11.1]!K05666|5|6.9e-23|112.5|cann:107874343|ATP-binding cassette, subfamily C (CFTR/MRP), member 2	XP_021751034.1	0	uncharacterized protein LOC110716698 [Chenopodium quinoa]
miR169h-3p_1	XM_021896658.1	3.5	NA	2.2	NA	XM_021896658.1	-	K14440|1|0.0e+00|1434.9|cqi:110717874|SWI/SNF-related matrix-associated actin-dependent regulator of chromatin subfamily A-like protein 1 [EC:3.6.4.12]	XP_021752350.1	0	SWI/SNF-related matrix-associated actin-dependent regulator of chromatin subfamily A-like protein 1 [Chenopodium quinoa]
miR169h-3p_1	XM_021902243.1	3.5	NA	2.2	NA	XM_021902243.1	-	K06630|1|2.4e-10|69.3|nta:107767874|14-3-3 protein epsilon!K00979|2|2.1e-09|66.2|mtr:MTR_1g057850|3-deoxy-manno-octulosonate cytidylyltransferase (CMP-KDO synthetase) [EC:2.7.7.38]!K01426|3|3.7e-06|55.5|vvi:100248659|amidase [EC:3.5.1.4]!K11000|5|6.2e-06|54.7|nta:107766145|callose synthase [EC:2.4.1.-]	XP_021757935.1	6.3e-222	uncharacterized protein LOC110722970 [Chenopodium quinoa]
miR169h-3p_1	XM_021903547.1	2.5	NA	1.8	NA	XM_021903547.1	-	K01147|1|0.0e+00|1139.0|vvi:100240818|exoribonuclease II [EC:3.1.13.1]	XP_021761140.1	0	ribonuclease II, chloroplastic/mitochondrial-like isoform X1 [Chenopodium quinoa]
miR169h-3p_1	XM_021903548.1	2.5	NA	1.8	NA	XM_021903548.1	-	K01147|1|0.0e+00|1127.5|vvi:100240818|exoribonuclease II [EC:3.1.13.1]	XP_021761141.1	0	ribonuclease II, chloroplastic/mitochondrial-like isoform X2 [Chenopodium quinoa]
miR169h-3p_1	XM_021905448.1	2.5	NA	1.8	NA	XM_021905448.1	-	K01147|1|0.0e+00|1137.5|vvi:100240818|exoribonuclease II [EC:3.1.13.1]	XP_021759239.1	0	ribonuclease II, chloroplastic/mitochondrial-like isoform X1 [Chenopodium quinoa]
miR169h-3p_1	XM_021905449.1	2.5	NA	1.8	NA	XM_021905449.1	-	K01147|1|0.0e+00|1125.9|vvi:100240818|exoribonuclease II [EC:3.1.13.1]	XP_021759240.1	0	ribonuclease II, chloroplastic/mitochondrial-like isoform X2 [Chenopodium quinoa]
miR169h-3p_1	XM_021909698.1	3	NA	2	NA	XM_021909698.1	-	K13096|1|1.2e-249|864.8|cqi:110729908|splicing factor 4	XP_021765390.1	6.4e-249	SURP and G-patch domain-containing protein 1-like protein [Chenopodium quinoa]
miR169h-3p_1	XM_021909699.1	3	NA	2	NA	XM_021909699.1	-	K13096|1|1.1e-249|864.8|cqi:110729908|splicing factor 4	XP_021765390.1	6e-249	SURP and G-patch domain-containing protein 1-like protein [Chenopodium quinoa]
miR169h-3p_1	XM_021909700.1	3	NA	2	NA	XM_021909700.1	-	K13096|1|1.1e-249|864.8|cqi:110729908|splicing factor 4	XP_021765390.1	5.9e-249	SURP and G-patch domain-containing protein 1-like protein [Chenopodium quinoa]
miR169h-3p_1	XM_021919001.1	3.5	NA	2.2	NA	XM_021919001.1	-	K14440|1|0.0e+00|1436.0|cqi:110738608|SWI/SNF-related matrix-associated actin-dependent regulator of chromatin subfamily A-like protein 1 [EC:3.6.4.12]	XP_021774693.1	0	SWI/SNF-related matrix-associated actin-dependent regulator of chromatin subfamily A-like protein 1 [Chenopodium quinoa]
miR169h-3p_1	XR_002508927.1	3.5	NA	2	NA	XR_002508927.1	-	K11276|1|1.8e-09|67.8|nto:104098817|nucleophosmin 1	XP_021764822.1	1e-34	histone deacetylase HDT1-like isoform X1 [Chenopodium quinoa]
miR169h_2	XM_021859348.1	2	NA	1.5	NA	XM_021859348.1	-	K08064|1|3.7e-186|654.1|cqi:110683013|nuclear transcription factor Y, alpha	XP_021715040.1	2e-185	nuclear transcription factor Y subunit A-7-like [Chenopodium quinoa]
miR169h_2	XM_021859349.1	2	NA	1.5	NA	XM_021859349.1	-	K08064|1|3.0e-186|654.1|cqi:110683013|nuclear transcription factor Y, alpha	XP_021715040.1	1.6e-185	nuclear transcription factor Y subunit A-7-like [Chenopodium quinoa]
miR169h_2	XM_021860810.1	3	NA	2	NA	XM_021860810.1	-	K08064|1|6.5e-165|583.6|cqi:110684358|nuclear transcription factor Y, alpha	XP_021716502.1	3.4e-164	nuclear transcription factor Y subunit A-3-like [Chenopodium quinoa]
miR169h_2	XM_021864799.1	3	NA	2	NA	XM_021864799.1	-	K08064|1|3.6e-163|577.8|cqi:110688113|nuclear transcription factor Y, alpha	XP_021720491.1	1.9e-162	nuclear transcription factor Y subunit A-3-like [Chenopodium quinoa]
miR169h_2	XM_021864800.1	3	NA	2	NA	XM_021864800.1	-	K08064|1|5.8e-163|577.8|cqi:110688113|nuclear transcription factor Y, alpha	XP_021720491.1	3.1e-162	nuclear transcription factor Y subunit A-3-like [Chenopodium quinoa]
miR169h_2	XM_021883579.1	3	NA	2	NA	XM_021883579.1	-	K08064|1|1.9e-195|684.9|cqi:110705677|nuclear transcription factor Y, alpha	XP_021739271.1	1e-194	nuclear transcription factor Y subunit A-4-like isoform X1 [Chenopodium quinoa]
miR169h_2	XM_021883580.1	3	NA	2	NA	XM_021883580.1	-	K08064|1|1.8e-193|678.3|cqi:110705677|nuclear transcription factor Y, alpha	XP_021739272.1	3.9e-194	nuclear transcription factor Y subunit A-4-like isoform X2 [Chenopodium quinoa]
miR169h_2	XM_021883581.1	3	NA	2	NA	XM_021883581.1	-	K08064|1|6.8e-193|676.4|cqi:110705677|nuclear transcription factor Y, alpha	XP_021739273.1	1.1e-193	nuclear transcription factor Y subunit A-4-like isoform X3 [Chenopodium quinoa]
miR169h_2	XM_021894366.1	2.5	NA	1.8	NA	XM_021894366.1	-	K08064|1|2.2e-185|651.4|cqi:110715758|nuclear transcription factor Y, alpha	XP_021750058.1	1.2e-184	nuclear transcription factor Y subunit A-7-like isoform X1 [Chenopodium quinoa]
miR169h_2	XM_021894367.1	2.5	NA	1.8	NA	XM_021894367.1	-	K08064|1|5.1e-176|620.2|cqi:110715758|nuclear transcription factor Y, alpha	XP_021750058.1	2.7e-175	nuclear transcription factor Y subunit A-7-like isoform X1 [Chenopodium quinoa]
miR169h_2	XR_002511881.1	3	NA	2	NA	XR_002511881.1	-	K08064|1|2.0e-48|195.7|cqi:110705677|nuclear transcription factor Y, alpha	XP_021739273.1	1e-47	nuclear transcription factor Y subunit A-4-like isoform X3 [Chenopodium quinoa]
miR169h_2	XR_002512657.1	3	NA	2	NA	XR_002512657.1	-	K08064|1|1.6e-48|196.1|cqi:110705677|nuclear transcription factor Y, alpha	XP_021739273.1	8.4e-48	nuclear transcription factor Y subunit A-4-like isoform X3 [Chenopodium quinoa]
miR169m-3p	XM_021860425.1	3.5	NA	2.5	NA	XM_021860425.1	-	K14494|1|3.2e-49|199.9|ppp:112275164|DELLA protein	XP_021716117.1	0	scarecrow-like protein 33 [Chenopodium quinoa]
miR169m-3p	XM_021865135.1	3.5	NA	2.5	NA	XM_021865135.1	-	K14494|1|1.2e-47|194.5|ppp:112275164|DELLA protein	XP_021720827.1	0	scarecrow-like protein 30 [Chenopodium quinoa]
miR169m-3p	XM_021867016.1	3	NA	2	NA	XM_021867016.1	-	K07478|1|2.0e-18|95.1|egr:108958286|putative ATPase!K02704|2|7.7e-18|93.2|soe:110789024|photosystem II CP47 chlorophyll apoprotein!K00108|3|1.8e-11|72.0|ccav:112502614|choline dehydrogenase [EC:1.1.99.1]	XP_021722708.1	2.1e-101	uncharacterized protein LOC110690182 [Chenopodium quinoa]
miR169m-3p	XM_021869867.1	3.5	NA	2	NA	XM_021869867.1	-	-	XP_021725559.1	0	uncharacterized protein LOC110692791 [Chenopodium quinoa]
miR169m-3p	XM_021875248.1	3.5	NA	2.2	NA	XM_021875248.1	-	-	XP_021730940.1	3.8e-109	uncharacterized protein LOC110697847 [Chenopodium quinoa]
miR169m-3p	XM_021876888.1	3.5	NA	2.2	NA	XM_021876888.1	-	-	XP_021732580.1	1.1e-184	uncharacterized protein LOC110699364 [Chenopodium quinoa]
miR169m-3p	XM_021882477.1	3.5	NA	2	NA	XM_021882477.1	-	K07478|1|4.6e-25|117.5|egr:108958286|putative ATPase!K02704|2|2.4e-18|95.1|soe:110789024|photosystem II CP47 chlorophyll apoprotein!K00108|3|1.3e-11|72.8|ccav:112502614|choline dehydrogenase [EC:1.1.99.1]!K08064|4|1.5e-07|59.3|mdm:103407270|nuclear transcription factor Y, alpha!K09338|5|2.1e-06|55.5|cit:102623619|homeobox-leucine zipper protein	XP_021738169.1	8.4e-126	uncharacterized protein LOC110704658 [Chenopodium quinoa]
miR169m-3p	XM_021884667.1	3	NA	2	NA	XM_021884667.1	-	K10754|1|2.1e-16|91.7|gmx:100802809|replication factor C subunit 1	XP_021740359.1	0	uncharacterized protein LOC110706706 isoform X1 [Chenopodium quinoa]
miR169m-3p	XM_021884668.1	3	NA	2	NA	XM_021884668.1	-	K10754|1|2.1e-16|91.7|gmx:100802809|replication factor C subunit 1	XP_021740360.1	0	uncharacterized protein LOC110706706 isoform X2 [Chenopodium quinoa]
miR169m-3p	XM_021884669.1	3	NA	2	NA	XM_021884669.1	-	K10754|1|2.1e-16|91.7|gmx:100802809|replication factor C subunit 1	XP_021740361.1	0	uncharacterized protein LOC110706706 isoform X3 [Chenopodium quinoa]
miR169m-3p	XM_021887985.1	3	NA	2	NA	XM_021887985.1	-	K10754|1|1.2e-14|85.9|gmx:100802809|replication factor C subunit 1	XP_021743677.1	0	uncharacterized protein LOC110709754 isoform X1 [Chenopodium quinoa]
miR169m-3p	XM_021887986.1	3	NA	2	NA	XM_021887986.1	-	K10754|1|1.2e-14|85.9|gmx:100802809|replication factor C subunit 1	XP_021743678.1	0	uncharacterized protein LOC110709754 isoform X2 [Chenopodium quinoa]
miR169m-3p	XM_021890049.1	3	NA	2.2	NA	XM_021890049.1	-	K11320|1|0.0e+00|4169.4|cqi:110711632|E1A-binding protein p400 [EC:3.6.4.-]	XP_021745741.1	0	protein PHOTOPERIOD-INDEPENDENT EARLY FLOWERING 1-like isoform X1 [Chenopodium quinoa]
miR169m-3p	XM_021890050.1	3	NA	2.2	NA	XM_021890050.1	-	K11320|1|0.0e+00|4158.2|cqi:110711632|E1A-binding protein p400 [EC:3.6.4.-]	XP_021745742.1	0	protein PHOTOPERIOD-INDEPENDENT EARLY FLOWERING 1-like isoform X2 [Chenopodium quinoa]
miR169m-3p	XM_021890051.1	3	NA	2.2	NA	XM_021890051.1	-	K11320|1|0.0e+00|4134.7|cqi:110711632|E1A-binding protein p400 [EC:3.6.4.-]	XP_021745743.1	0	protein PHOTOPERIOD-INDEPENDENT EARLY FLOWERING 1-like isoform X3 [Chenopodium quinoa]
miR169m-3p	XM_021890052.1	3	NA	2.2	NA	XM_021890052.1	-	K11320|1|0.0e+00|3939.4|cqi:110711632|E1A-binding protein p400 [EC:3.6.4.-]	XP_021745741.1	0	protein PHOTOPERIOD-INDEPENDENT EARLY FLOWERING 1-like isoform X1 [Chenopodium quinoa]
miR169m-3p	XM_021891366.1	3.5	NA	2.5	NA	XM_021891366.1	-	K12259|1|0.0e+00|1102.0|cqi:110712904|spermine oxidase [EC:1.5.3.16 1.5.3.-]	XP_021747058.1	0	probable polyamine oxidase 5 [Chenopodium quinoa]
miR169m-3p	XM_021891637.1	3.5	NA	2	NA	XM_021891637.1	-	K07478|1|1.6e-25|119.0|egr:108958286|putative ATPase!K02704|2|6.4e-19|97.1|soe:110789024|photosystem II CP47 chlorophyll apoprotein!K00108|3|1.7e-11|72.4|ccav:112502614|choline dehydrogenase [EC:1.1.99.1]!K08064|4|9.6e-07|56.6|mdm:103407270|nuclear transcription factor Y, alpha	XP_021747329.1	3.8e-126	uncharacterized protein LOC110713172 [Chenopodium quinoa]
miR169m-3p	XM_021892279.1	3.5	NA	2.2	NA	XM_021892279.1	-	K14963|1|3.3e-15|86.3|peq:110039474|COMPASS component SWD3!K13422|3|3.6e-09|66.2|brp:103839572|transcription factor MYC2	XP_021747971.1	4.2e-109	transcription factor bHLH93-like [Chenopodium quinoa]
miR169m-3p	XM_021893323.1	3	NA	2.2	NA	XM_021893323.1	-	K11320|1|0.0e+00|4143.2|cqi:110714772|E1A-binding protein p400 [EC:3.6.4.-]	XP_021749015.1	0	protein PHOTOPERIOD-INDEPENDENT EARLY FLOWERING 1-like isoform X1 [Chenopodium quinoa]
miR169m-3p	XM_021893324.1	3	NA	2.2	NA	XM_021893324.1	-	K11320|1|0.0e+00|3911.7|cqi:110714772|E1A-binding protein p400 [EC:3.6.4.-]	XP_021749015.1	0	protein PHOTOPERIOD-INDEPENDENT EARLY FLOWERING 1-like isoform X1 [Chenopodium quinoa]
miR169m-3p	XM_021895478.1	3	NA	1.8	NA	XM_021895478.1	-	K12840|1|2.9e-218|760.4|cqi:110716833|splicing factor 45	XP_021751170.1	1.6e-217	DNA-damage-repair/toleration protein DRT111, chloroplastic-like [Chenopodium quinoa]
miR169m-3p	XM_021898921.1	3	NA	2.5	NA	XM_021898921.1	-	K07478|1|4.4e-21|104.4|egr:108958286|putative ATPase!K08064|2|9.2e-11|70.1|mdm:103407270|nuclear transcription factor Y, alpha!K12349|3|3.0e-09|65.1|ccaj:109806181|neutral ceramidase [EC:3.5.1.23]!K13459|4|6.6e-09|63.9|nnu:104599110|disease resistance protein RPS2!K01051|5|4.3e-08|61.2|mdm:103431601|pectinesterase [EC:3.1.1.11]	XP_021754613.1	1.3e-132	uncharacterized protein LOC110719939 [Chenopodium quinoa]
miR169m-3p	XM_021912679.1	3.5	NA	2	NA	XM_021912679.1	-	K11294|1|4.3e-06|57.0|gmx:100786132|nucleolin	XP_021768371.1	0	uncharacterized protein LOC110732699 [Chenopodium quinoa]
miR169m-3p	XM_021913589.1	3.5	NA	2.2	NA	XM_021913589.1	-	-	XP_021769281.1	8.5e-185	uncharacterized protein LOC110733526 [Chenopodium quinoa]
miR169r-3p	XM_021882413.1	3.5	NA	1.8	NA	XM_021882413.1	-	K02355|1|0.0e+00|1441.4|bvg:104892065|elongation factor G	XP_021738105.1	0	elongation factor G-2, chloroplastic-like [Chenopodium quinoa]
miR169r-3p	XM_021912719.1	3.5	NA	1.8	NA	XM_021912719.1	-	K02355|1|0.0e+00|1539.6|cqi:110732731|elongation factor G	XP_021768411.1	0	elongation factor G-2, chloroplastic [Chenopodium quinoa]
miR169v_1	XM_021859348.1	2	NA	1.5	NA	XM_021859348.1	-	K08064|1|3.7e-186|654.1|cqi:110683013|nuclear transcription factor Y, alpha	XP_021715040.1	2e-185	nuclear transcription factor Y subunit A-7-like [Chenopodium quinoa]
miR169v_1	XM_021859349.1	2	NA	1.5	NA	XM_021859349.1	-	K08064|1|3.0e-186|654.1|cqi:110683013|nuclear transcription factor Y, alpha	XP_021715040.1	1.6e-185	nuclear transcription factor Y subunit A-7-like [Chenopodium quinoa]
miR169v_1	XM_021860810.1	2	NA	1.5	NA	XM_021860810.1	-	K08064|1|6.5e-165|583.6|cqi:110684358|nuclear transcription factor Y, alpha	XP_021716502.1	3.4e-164	nuclear transcription factor Y subunit A-3-like [Chenopodium quinoa]
miR169v_1	XM_021864799.1	2	NA	1.5	NA	XM_021864799.1	-	K08064|1|3.6e-163|577.8|cqi:110688113|nuclear transcription factor Y, alpha	XP_021720491.1	1.9e-162	nuclear transcription factor Y subunit A-3-like [Chenopodium quinoa]
miR169v_1	XM_021864800.1	2	NA	1.5	NA	XM_021864800.1	-	K08064|1|5.8e-163|577.8|cqi:110688113|nuclear transcription factor Y, alpha	XP_021720491.1	3.1e-162	nuclear transcription factor Y subunit A-3-like [Chenopodium quinoa]
miR169v_1	XM_021869744.1	3.5	NA	2.5	NA	XM_021869744.1	-	K00430|1|1.4e-190|668.3|cqi:110692706|peroxidase [EC:1.11.1.7]	XP_021725436.1	7.7e-190	peroxidase 17-like [Chenopodium quinoa]
miR169v_1	XM_021869745.1	3.5	NA	2.5	NA	XM_021869745.1	-	K00430|1|1.7e-190|668.3|cqi:110692706|peroxidase [EC:1.11.1.7]	XP_021725436.1	8.9e-190	peroxidase 17-like [Chenopodium quinoa]
miR169v_1	XM_021873301.1	2	NA	1.5	NA	XM_021873301.1	-	K08064|1|5.5e-178|627.1|cqi:110696037|nuclear transcription factor Y, alpha	XP_021728993.1	2.9e-177	nuclear transcription factor Y subunit A-1-like isoform X1 [Chenopodium quinoa]
miR169v_1	XM_021873302.1	2	NA	1.5	NA	XM_021873302.1	-	K08064|1|5.6e-178|627.1|cqi:110696037|nuclear transcription factor Y, alpha	XP_021728993.1	3e-177	nuclear transcription factor Y subunit A-1-like isoform X1 [Chenopodium quinoa]
miR169v_1	XM_021873303.1	2	NA	1.5	NA	XM_021873303.1	-	K08064|1|1.0e-171|606.3|cqi:110696037|nuclear transcription factor Y, alpha	XP_021728995.1	4.3e-173	nuclear transcription factor Y subunit A-1-like isoform X2 [Chenopodium quinoa]
miR169v_1	XM_021883579.1	3	NA	2	NA	XM_021883579.1	-	K08064|1|1.9e-195|684.9|cqi:110705677|nuclear transcription factor Y, alpha	XP_021739271.1	1e-194	nuclear transcription factor Y subunit A-4-like isoform X1 [Chenopodium quinoa]
miR169v_1	XM_021883580.1	3	NA	2	NA	XM_021883580.1	-	K08064|1|1.8e-193|678.3|cqi:110705677|nuclear transcription factor Y, alpha	XP_021739272.1	3.9e-194	nuclear transcription factor Y subunit A-4-like isoform X2 [Chenopodium quinoa]
miR169v_1	XM_021883581.1	3	NA	2	NA	XM_021883581.1	-	K08064|1|6.8e-193|676.4|cqi:110705677|nuclear transcription factor Y, alpha	XP_021739273.1	1.1e-193	nuclear transcription factor Y subunit A-4-like isoform X3 [Chenopodium quinoa]
miR169v_1	XM_021894366.1	2	NA	1.5	NA	XM_021894366.1	-	K08064|1|2.2e-185|651.4|cqi:110715758|nuclear transcription factor Y, alpha	XP_021750058.1	1.2e-184	nuclear transcription factor Y subunit A-7-like isoform X1 [Chenopodium quinoa]
miR169v_1	XM_021894367.1	2	NA	1.5	NA	XM_021894367.1	-	K08064|1|5.1e-176|620.2|cqi:110715758|nuclear transcription factor Y, alpha	XP_021750058.1	2.7e-175	nuclear transcription factor Y subunit A-7-like isoform X1 [Chenopodium quinoa]
miR169v_1	XM_021902797.1	3.5	NA	2.5	NA	XM_021902797.1	-	K00430|1|1.6e-190|668.3|cqi:110723438|peroxidase [EC:1.11.1.7]	XP_021758489.1	8.5e-190	peroxidase 17-like [Chenopodium quinoa]
miR169v_1	XM_021916389.1	2	NA	1.5	NA	XM_021916389.1	-	K08064|1|5.9e-179|630.2|cqi:110736224|nuclear transcription factor Y, alpha	XP_021772081.1	3.1e-178	nuclear transcription factor Y subunit A-1-like isoform X1 [Chenopodium quinoa]
miR169v_1	XM_021916390.1	2	NA	1.5	NA	XM_021916390.1	-	K08064|1|6.0e-179|630.2|cqi:110736224|nuclear transcription factor Y, alpha	XP_021772081.1	3.2e-178	nuclear transcription factor Y subunit A-1-like isoform X1 [Chenopodium quinoa]
miR169v_1	XM_021916391.1	2	NA	1.5	NA	XM_021916391.1	-	K08064|1|6.3e-179|630.2|cqi:110736224|nuclear transcription factor Y, alpha	XP_021772081.1	3.4e-178	nuclear transcription factor Y subunit A-1-like isoform X1 [Chenopodium quinoa]
miR169v_1	XM_021916392.1	2	NA	1.5	NA	XM_021916392.1	-	K08064|1|5.8e-179|630.2|cqi:110736224|nuclear transcription factor Y, alpha	XP_021772081.1	3.1e-178	nuclear transcription factor Y subunit A-1-like isoform X1 [Chenopodium quinoa]
miR169v_1	XM_021916393.1	2	NA	1.5	NA	XM_021916393.1	-	K08064|1|1.1e-172|609.4|cqi:110736224|nuclear transcription factor Y, alpha	XP_021772085.1	4.6e-174	nuclear transcription factor Y subunit A-1-like isoform X2 [Chenopodium quinoa]
miR169v_1	XM_021920326.1	2.5	NA	2.5	NA	XM_021920326.1	-	K00588|1|2.5e-45|185.7|sita:101753568|caffeoyl-CoA O-methyltransferase [EC:2.1.1.104]!K18883|2|4.3e-45|184.9|sita:101753161|tricin synthase [EC:2.1.1.175]	XP_021776018.1	9.6e-160	uncharacterized protein LOC110739844 [Chenopodium quinoa]
miR169v_1	XM_021920327.1	2.5	NA	2.5	NA	XM_021920327.1	-	K00588|1|2.7e-45|185.7|sita:101753568|caffeoyl-CoA O-methyltransferase [EC:2.1.1.104]!K18883|2|4.5e-45|184.9|sita:101753161|tricin synthase [EC:2.1.1.175]	XP_021776018.1	1e-159	uncharacterized protein LOC110739844 [Chenopodium quinoa]
miR169v_1	XR_002511881.1	3	NA	2	NA	XR_002511881.1	-	K08064|1|2.0e-48|195.7|cqi:110705677|nuclear transcription factor Y, alpha	XP_021739273.1	1e-47	nuclear transcription factor Y subunit A-4-like isoform X3 [Chenopodium quinoa]
miR169v_1	XR_002512657.1	3	NA	2	NA	XR_002512657.1	-	K08064|1|1.6e-48|196.1|cqi:110705677|nuclear transcription factor Y, alpha	XP_021739273.1	8.4e-48	nuclear transcription factor Y subunit A-4-like isoform X3 [Chenopodium quinoa]
miR171a_3	XM_021862798.1	0	NA	0	NA	XM_021862798.1	GO:0006355,GO:0006351,GO:0030154,GO:0048831,GO:0006355,GO:0006351,	K14494|1|9.8e-18|95.1|gmx:547719|DELLA protein	XP_021718490.1	0	scarecrow-like protein 15 [Chenopodium quinoa]
miR171a_3	XM_021882454.1	1	NA	0.5	NA	XM_021882454.1	-	K14494|1|2.6e-33|147.1|zju:107429297|DELLA protein	XP_021738146.1	0	scarecrow-like protein 6 isoform X1 [Chenopodium quinoa]
miR171a_3	XM_021882455.1	1	NA	0.5	NA	XM_021882455.1	-	K14494|1|2.6e-33|147.1|zju:107429297|DELLA protein	XP_021738147.1	0	scarecrow-like protein 6 isoform X2 [Chenopodium quinoa]
miR171a_3	XM_021902101.1	0	NA	0	NA	XM_021902101.1	GO:0006355,GO:0006351,GO:0030154,GO:0048831,GO:0006355,GO:0006351,	K14494|1|7.0e-12|75.5|csat:104779468|DELLA protein	XP_021757793.1	0	scarecrow-like protein 15 [Chenopodium quinoa]
miR171a_3	XM_021908613.1	3	NA	2	NA	XM_021908613.1	-	K14515|1|1.3e-09|68.2|mus:103999288|EIN3-binding F-box protein!K10268|2|1.9e-08|64.3|dzi:111296007|F-box and leucine-rich repeat protein 2/20	XP_021764305.1	0	F-box/LRR-repeat protein 17-like [Chenopodium quinoa]
miR171a_3	XM_021912768.1	1	NA	0.5	NA	XM_021912768.1	-	K14494|1|1.2e-33|148.3|dzi:111318061|DELLA protein	XP_021768460.1	0	scarecrow-like protein 6 isoform X1 [Chenopodium quinoa]
miR171a_3	XM_021912769.1	1	NA	0.5	NA	XM_021912769.1	-	K14494|1|1.2e-33|148.3|dzi:111318061|DELLA protein	XP_021768461.1	0	scarecrow-like protein 6 isoform X2 [Chenopodium quinoa]
miR171b_2	XM_021862798.1	0	NA	0	NA	XM_021862798.1	GO:0006355,GO:0006351,GO:0030154,GO:0048831,GO:0006355,GO:0006351,	K14494|1|9.8e-18|95.1|gmx:547719|DELLA protein	XP_021718490.1	0	scarecrow-like protein 15 [Chenopodium quinoa]
miR171b_2	XM_021882454.1	1	NA	0.5	NA	XM_021882454.1	-	K14494|1|2.6e-33|147.1|zju:107429297|DELLA protein	XP_021738146.1	0	scarecrow-like protein 6 isoform X1 [Chenopodium quinoa]
miR171b_2	XM_021882455.1	1	NA	0.5	NA	XM_021882455.1	-	K14494|1|2.6e-33|147.1|zju:107429297|DELLA protein	XP_021738147.1	0	scarecrow-like protein 6 isoform X2 [Chenopodium quinoa]
miR171b_2	XM_021902101.1	0	NA	0	NA	XM_021902101.1	GO:0006355,GO:0006351,GO:0030154,GO:0048831,GO:0006355,GO:0006351,	K14494|1|7.0e-12|75.5|csat:104779468|DELLA protein	XP_021757793.1	0	scarecrow-like protein 15 [Chenopodium quinoa]
miR171b_2	XM_021912768.1	1	NA	0.5	NA	XM_021912768.1	-	K14494|1|1.2e-33|148.3|dzi:111318061|DELLA protein	XP_021768460.1	0	scarecrow-like protein 6 isoform X1 [Chenopodium quinoa]
miR171b_2	XM_021912769.1	1	NA	0.5	NA	XM_021912769.1	-	K14494|1|1.2e-33|148.3|dzi:111318061|DELLA protein	XP_021768461.1	0	scarecrow-like protein 6 isoform X2 [Chenopodium quinoa]
miR171c_3	XM_021862798.1	3	NA	1.5	NA	XM_021862798.1	GO:0006355,GO:0006351,GO:0030154,GO:0048831,GO:0006355,GO:0006351,	K14494|1|9.8e-18|95.1|gmx:547719|DELLA protein	XP_021718490.1	0	scarecrow-like protein 15 [Chenopodium quinoa]
miR171c_3	XM_021882454.1	1	NA	0.5	NA	XM_021882454.1	-	K14494|1|2.6e-33|147.1|zju:107429297|DELLA protein	XP_021738146.1	0	scarecrow-like protein 6 isoform X1 [Chenopodium quinoa]
miR171c_3	XM_021882455.1	1	NA	0.5	NA	XM_021882455.1	-	K14494|1|2.6e-33|147.1|zju:107429297|DELLA protein	XP_021738147.1	0	scarecrow-like protein 6 isoform X2 [Chenopodium quinoa]
miR171c_3	XM_021885036.1	3	NA	2	NA	XM_021885036.1	-	K17964|1|0.0e+00|2263.4|cqi:110707018|leucine-rich PPR motif-containing protein, mitochondrial	XP_021740728.1	0	pentatricopeptide repeat-containing protein At5g55840-like [Chenopodium quinoa]
miR171c_3	XM_021885037.1	3	NA	2	NA	XM_021885037.1	-	K17964|1|0.0e+00|2263.4|cqi:110707018|leucine-rich PPR motif-containing protein, mitochondrial	XP_021740728.1	0	pentatricopeptide repeat-containing protein At5g55840-like [Chenopodium quinoa]
miR171c_3	XM_021885038.1	3	NA	2	NA	XM_021885038.1	-	K17964|1|0.0e+00|2263.4|cqi:110707018|leucine-rich PPR motif-containing protein, mitochondrial	XP_021740728.1	0	pentatricopeptide repeat-containing protein At5g55840-like [Chenopodium quinoa]
miR171c_3	XM_021902101.1	3	NA	1.5	NA	XM_021902101.1	GO:0006355,GO:0006351,GO:0030154,GO:0048831,GO:0006355,GO:0006351,	K14494|1|7.0e-12|75.5|csat:104779468|DELLA protein	XP_021757793.1	0	scarecrow-like protein 15 [Chenopodium quinoa]
miR171c_3	XM_021912768.1	1	NA	0.5	NA	XM_021912768.1	-	K14494|1|1.2e-33|148.3|dzi:111318061|DELLA protein	XP_021768460.1	0	scarecrow-like protein 6 isoform X1 [Chenopodium quinoa]
miR171c_3	XM_021912769.1	1	NA	0.5	NA	XM_021912769.1	-	K14494|1|1.2e-33|148.3|dzi:111318061|DELLA protein	XP_021768461.1	0	scarecrow-like protein 6 isoform X2 [Chenopodium quinoa]
miR171c_3	XM_021915714.1	3	NA	2	NA	XM_021915714.1	-	K17964|1|0.0e+00|2260.7|cqi:110735522|leucine-rich PPR motif-containing protein, mitochondrial	XP_021771406.1	0	pentatricopeptide repeat-containing protein At5g55840-like [Chenopodium quinoa]
miR171c_3	XM_021915715.1	3	NA	2	NA	XM_021915715.1	-	K17964|1|0.0e+00|2260.7|cqi:110735522|leucine-rich PPR motif-containing protein, mitochondrial	XP_021771406.1	0	pentatricopeptide repeat-containing protein At5g55840-like [Chenopodium quinoa]
miR171c_3	XM_021915716.1	3	NA	2	NA	XM_021915716.1	-	K17964|1|0.0e+00|2260.7|cqi:110735522|leucine-rich PPR motif-containing protein, mitochondrial	XP_021771406.1	0	pentatricopeptide repeat-containing protein At5g55840-like [Chenopodium quinoa]
miR171c_3	XM_021915717.1	3	NA	2	NA	XM_021915717.1	-	K17964|1|0.0e+00|2260.7|cqi:110735522|leucine-rich PPR motif-containing protein, mitochondrial	XP_021771406.1	0	pentatricopeptide repeat-containing protein At5g55840-like [Chenopodium quinoa]
miR171d_1	XM_021862798.1	3	NA	1.5	NA	XM_021862798.1	GO:0006355,GO:0006351,GO:0030154,GO:0048831,GO:0006355,GO:0006351,	K14494|1|9.8e-18|95.1|gmx:547719|DELLA protein	XP_021718490.1	0	scarecrow-like protein 15 [Chenopodium quinoa]
miR171d_1	XM_021882454.1	1	NA	0.5	NA	XM_021882454.1	-	K14494|1|2.6e-33|147.1|zju:107429297|DELLA protein	XP_021738146.1	0	scarecrow-like protein 6 isoform X1 [Chenopodium quinoa]
miR171d_1	XM_021882455.1	1	NA	0.5	NA	XM_021882455.1	-	K14494|1|2.6e-33|147.1|zju:107429297|DELLA protein	XP_021738147.1	0	scarecrow-like protein 6 isoform X2 [Chenopodium quinoa]
miR171d_1	XM_021902101.1	3	NA	1.5	NA	XM_021902101.1	GO:0006355,GO:0006351,GO:0030154,GO:0048831,GO:0006355,GO:0006351,	K14494|1|7.0e-12|75.5|csat:104779468|DELLA protein	XP_021757793.1	0	scarecrow-like protein 15 [Chenopodium quinoa]
miR171d_1	XM_021912768.1	1	NA	0.5	NA	XM_021912768.1	-	K14494|1|1.2e-33|148.3|dzi:111318061|DELLA protein	XP_021768460.1	0	scarecrow-like protein 6 isoform X1 [Chenopodium quinoa]
miR171d_1	XM_021912769.1	1	NA	0.5	NA	XM_021912769.1	-	K14494|1|1.2e-33|148.3|dzi:111318061|DELLA protein	XP_021768461.1	0	scarecrow-like protein 6 isoform X2 [Chenopodium quinoa]
miR171f_3	XM_021882454.1	1	NA	0.5	NA	XM_021882454.1	-	K14494|1|2.6e-33|147.1|zju:107429297|DELLA protein	XP_021738146.1	0	scarecrow-like protein 6 isoform X1 [Chenopodium quinoa]
miR171f_3	XM_021882455.1	1	NA	0.5	NA	XM_021882455.1	-	K14494|1|2.6e-33|147.1|zju:107429297|DELLA protein	XP_021738147.1	0	scarecrow-like protein 6 isoform X2 [Chenopodium quinoa]
miR171f_3	XM_021912768.1	1	NA	0.5	NA	XM_021912768.1	-	K14494|1|1.2e-33|148.3|dzi:111318061|DELLA protein	XP_021768460.1	0	scarecrow-like protein 6 isoform X1 [Chenopodium quinoa]
miR171f_3	XM_021912769.1	1	NA	0.5	NA	XM_021912769.1	-	K14494|1|1.2e-33|148.3|dzi:111318061|DELLA protein	XP_021768461.1	0	scarecrow-like protein 6 isoform X2 [Chenopodium quinoa]
miR172a_2	XM_021858650.1	1	NA	0.5	NA	XM_021858650.1	GO:0005634,GO:0005634,GO:0003677,GO:0003700,GO:0003677,GO:0003700,GO:0007275,GO:0006351,GO:0007275,GO:0006351,	K09284|1|0.0e+00|1162.1|cqi:110682329|AP2-like factor, euAP2 lineage	XP_021714342.1	0	floral homeotic protein APETALA 2-like [Chenopodium quinoa]
miR172a_2	XM_021860086.1	1	NA	0.5	NA	XM_021860086.1	-	K09284|1|3.4e-306|1053.1|cqi:110683698|AP2-like factor, euAP2 lineage	XP_021715778.1	1.8e-305	floral homeotic protein APETALA 2-like isoform X1 [Chenopodium quinoa]
miR172a_2	XM_021860087.1	1	NA	0.5	NA	XM_021860087.1	-	K09284|1|3.2e-304|1046.6|cqi:110683698|AP2-like factor, euAP2 lineage	XP_021715779.1	6.9e-305	floral homeotic protein APETALA 2-like isoform X2 [Chenopodium quinoa]
miR172a_2	XM_021860088.1	1	NA	0.5	NA	XM_021860088.1	-	K09284|1|3.2e-304|1046.6|cqi:110683698|AP2-like factor, euAP2 lineage	XP_021715780.1	6.9e-305	floral homeotic protein APETALA 2-like isoform X3 [Chenopodium quinoa]
miR172a_2	XM_021860089.1	1	NA	0.5	NA	XM_021860089.1	-	K09284|1|1.7e-294|1014.2|cqi:110683698|AP2-like factor, euAP2 lineage	XP_021715781.1	8.8e-297	ethylene-responsive transcription factor RAP2-7-like isoform X4 [Chenopodium quinoa]
miR172a_2	XM_021860090.1	1	NA	0.5	NA	XM_021860090.1	-	K09284|1|2.1e-247|857.8|cqi:110683698|AP2-like factor, euAP2 lineage	XP_021715782.1	4.8e-250	AP2-like ethylene-responsive transcription factor TOE3 isoform X5 [Chenopodium quinoa]
miR172a_2	XM_021860091.1	1	NA	0.5	NA	XM_021860091.1	-	K09284|1|5.5e-248|859.8|cqi:110683698|AP2-like factor, euAP2 lineage	XP_021715783.1	1.4e-249	AP2-like ethylene-responsive transcription factor TOE3 isoform X6 [Chenopodium quinoa]
miR172a_2	XM_021870718.1	3.5	NA	2	NA	XM_021870718.1	-	-	XP_021726410.1	0	uncharacterized protein LOC110693585 [Chenopodium quinoa]
miR172a_2	XM_021874129.1	3	NA	2	NA	XM_021874129.1	-	K19199|1|3.4e-35|152.9|cqi:110684701|histone-lysine N-methyltransferase SETD3 [EC:2.1.1.43]	XP_021729242.1	7.6e-118	uncharacterized protein LOC110696272 isoform X1 [Chenopodium quinoa]
miR172a_2	XM_021883629.1	3.5	NA	2.5	NA	XM_021883629.1	GO:0043231,GO:0004519,GO:0003723,GO:0008270,GO:0009451,	K22565|1|4.1e-280|966.8|rcu:8269241|COMM domain containing 9!K06180|3|1.0e-113|414.1|sind:105165964|23S rRNA pseudouridine1911/1915/1917 synthase [EC:5.4.99.23]	XP_021739321.1	0	pentatricopeptide repeat-containing protein At5g50390, chloroplastic-like [Chenopodium quinoa]
miR172a_2	XM_021884851.1	3.5	NA	2	NA	XM_021884851.1	-	-	XP_021740543.1	0	uncharacterized protein LOC110706874 isoform X1 [Chenopodium quinoa]
miR172a_2	XM_021884852.1	3.5	NA	2	NA	XM_021884852.1	-	-	XP_021740544.1	0	uncharacterized protein LOC110706874 isoform X2 [Chenopodium quinoa]
miR172a_2	XM_021888574.1	1	NA	0.5	NA	XM_021888574.1	-	K09284|1|7.0e-304|1045.4|cqi:110710297|AP2-like factor, euAP2 lineage	XP_021744266.1	3.7e-303	AP2-like ethylene-responsive transcription factor TOE3 isoform X1 [Chenopodium quinoa]
miR172a_2	XM_021888575.1	1	NA	0.5	NA	XM_021888575.1	-	K09284|1|6.6e-302|1038.9|cqi:110710297|AP2-like factor, euAP2 lineage	XP_021744267.1	1.4e-302	AP2-like ethylene-responsive transcription factor TOE3 isoform X2 [Chenopodium quinoa]
miR172a_2	XM_021888576.1	1	NA	0.5	NA	XM_021888576.1	-	K09284|1|6.6e-302|1038.9|cqi:110710297|AP2-like factor, euAP2 lineage	XP_021744268.1	1.4e-302	AP2-like ethylene-responsive transcription factor TOE3 isoform X3 [Chenopodium quinoa]
miR172a_2	XM_021888577.1	1	NA	0.5	NA	XM_021888577.1	-	K09284|1|3.5e-292|1006.5|cqi:110710297|AP2-like factor, euAP2 lineage	XP_021744269.1	1.8e-294	ethylene-responsive transcription factor RAP2-7-like isoform X4 [Chenopodium quinoa]
miR172a_2	XM_021888578.1	1	NA	0.5	NA	XM_021888578.1	-	K09284|1|3.3e-290|1000.0|cqi:110710297|AP2-like factor, euAP2 lineage	XP_021744270.1	6.9e-294	ethylene-responsive transcription factor RAP2-7-like isoform X5 [Chenopodium quinoa]
miR172a_2	XM_021897122.1	1	NA	0.5	NA	XM_021897122.1	GO:0005634,GO:0005634,GO:0003677,GO:0003700,GO:0003677,GO:0003700,GO:0007275,GO:0006351,GO:0007275,GO:0006351,	K09284|1|0.0e+00|1167.5|cqi:110718284|AP2-like factor, euAP2 lineage	XP_021752814.1	0	floral homeotic protein APETALA 2-like [Chenopodium quinoa]
miR172a_2	XM_021900042.1	3	NA	2	NA	XM_021900042.1	-	-	XP_021755734.1	0	uncharacterized protein LOC110720943 [Chenopodium quinoa]
miR172a_2	XM_021907641.1	3.5	NA	1.8	NA	XM_021907641.1	-	K05747|1|7.7e-31|138.7|ppp:112285895|Wiskott-Aldrich syndrome protein!K11323|2|6.5e-06|55.8|vcn:VOLCADRAFT_121342|histone arginine demethylase JMJD6 [EC:1.14.11.-]	XP_021763333.1	0	uncharacterized protein LOC110728035 isoform X1 [Chenopodium quinoa]
miR172a_2	XM_021907642.1	3.5	NA	1.8	NA	XM_021907642.1	-	K05747|1|7.7e-21|105.1|ppp:112285895|Wiskott-Aldrich syndrome protein	XP_021763334.1	3.7e-279	uncharacterized protein LOC110728035 isoform X2 [Chenopodium quinoa]
miR172a_3	XM_021858650.1	2	NA	1	NA	XM_021858650.1	GO:0005634,GO:0005634,GO:0003677,GO:0003700,GO:0003677,GO:0003700,GO:0007275,GO:0006351,GO:0007275,GO:0006351,	K09284|1|0.0e+00|1162.1|cqi:110682329|AP2-like factor, euAP2 lineage	XP_021714342.1	0	floral homeotic protein APETALA 2-like [Chenopodium quinoa]
miR172a_3	XM_021860086.1	2	NA	1	NA	XM_021860086.1	-	K09284|1|3.4e-306|1053.1|cqi:110683698|AP2-like factor, euAP2 lineage	XP_021715778.1	1.8e-305	floral homeotic protein APETALA 2-like isoform X1 [Chenopodium quinoa]
miR172a_3	XM_021860087.1	2	NA	1	NA	XM_021860087.1	-	K09284|1|3.2e-304|1046.6|cqi:110683698|AP2-like factor, euAP2 lineage	XP_021715779.1	6.9e-305	floral homeotic protein APETALA 2-like isoform X2 [Chenopodium quinoa]
miR172a_3	XM_021860088.1	2	NA	1	NA	XM_021860088.1	-	K09284|1|3.2e-304|1046.6|cqi:110683698|AP2-like factor, euAP2 lineage	XP_021715780.1	6.9e-305	floral homeotic protein APETALA 2-like isoform X3 [Chenopodium quinoa]
miR172a_3	XM_021860089.1	2	NA	1	NA	XM_021860089.1	-	K09284|1|1.7e-294|1014.2|cqi:110683698|AP2-like factor, euAP2 lineage	XP_021715781.1	8.8e-297	ethylene-responsive transcription factor RAP2-7-like isoform X4 [Chenopodium quinoa]
miR172a_3	XM_021860090.1	2	NA	1	NA	XM_021860090.1	-	K09284|1|2.1e-247|857.8|cqi:110683698|AP2-like factor, euAP2 lineage	XP_021715782.1	4.8e-250	AP2-like ethylene-responsive transcription factor TOE3 isoform X5 [Chenopodium quinoa]
miR172a_3	XM_021860091.1	2	NA	1	NA	XM_021860091.1	-	K09284|1|5.5e-248|859.8|cqi:110683698|AP2-like factor, euAP2 lineage	XP_021715783.1	1.4e-249	AP2-like ethylene-responsive transcription factor TOE3 isoform X6 [Chenopodium quinoa]
miR172a_3	XM_021874129.1	3.5	NA	2.2	NA	XM_021874129.1	-	K19199|1|3.4e-35|152.9|cqi:110684701|histone-lysine N-methyltransferase SETD3 [EC:2.1.1.43]	XP_021729242.1	7.6e-118	uncharacterized protein LOC110696272 isoform X1 [Chenopodium quinoa]
miR172a_3	XM_021883629.1	3.5	NA	2.5	NA	XM_021883629.1	GO:0043231,GO:0004519,GO:0003723,GO:0008270,GO:0009451,	K22565|1|4.1e-280|966.8|rcu:8269241|COMM domain containing 9!K06180|3|1.0e-113|414.1|sind:105165964|23S rRNA pseudouridine1911/1915/1917 synthase [EC:5.4.99.23]	XP_021739321.1	0	pentatricopeptide repeat-containing protein At5g50390, chloroplastic-like [Chenopodium quinoa]
miR172a_3	XM_021888574.1	2	NA	1	NA	XM_021888574.1	-	K09284|1|7.0e-304|1045.4|cqi:110710297|AP2-like factor, euAP2 lineage	XP_021744266.1	3.7e-303	AP2-like ethylene-responsive transcription factor TOE3 isoform X1 [Chenopodium quinoa]
miR172a_3	XM_021888575.1	2	NA	1	NA	XM_021888575.1	-	K09284|1|6.6e-302|1038.9|cqi:110710297|AP2-like factor, euAP2 lineage	XP_021744267.1	1.4e-302	AP2-like ethylene-responsive transcription factor TOE3 isoform X2 [Chenopodium quinoa]
miR172a_3	XM_021888576.1	2	NA	1	NA	XM_021888576.1	-	K09284|1|6.6e-302|1038.9|cqi:110710297|AP2-like factor, euAP2 lineage	XP_021744268.1	1.4e-302	AP2-like ethylene-responsive transcription factor TOE3 isoform X3 [Chenopodium quinoa]
miR172a_3	XM_021888577.1	2	NA	1	NA	XM_021888577.1	-	K09284|1|3.5e-292|1006.5|cqi:110710297|AP2-like factor, euAP2 lineage	XP_021744269.1	1.8e-294	ethylene-responsive transcription factor RAP2-7-like isoform X4 [Chenopodium quinoa]
miR172a_3	XM_021888578.1	2	NA	1	NA	XM_021888578.1	-	K09284|1|3.3e-290|1000.0|cqi:110710297|AP2-like factor, euAP2 lineage	XP_021744270.1	6.9e-294	ethylene-responsive transcription factor RAP2-7-like isoform X5 [Chenopodium quinoa]
miR172a_3	XM_021890360.1	3	NA	1.5	NA	XM_021890360.1	-	K12900|1|1.4e-28|130.6|lang:109341833|FUS-interacting serine-arginine-rich protein 1!K09286|3|6.1e-27|125.2|pmum:103333394|EREBP-like factor	XP_021746052.1	5.3e-170	ethylene-responsive transcription factor ERF113-like isoform X1 [Chenopodium quinoa]
miR172a_3	XM_021890366.1	3	NA	1.5	NA	XM_021890366.1	-	K12900|1|1.4e-28|130.6|lang:109344099|FUS-interacting serine-arginine-rich protein 1!K09286|3|1.2e-27|127.5|pmum:103333394|EREBP-like factor	XP_021746058.1	1.5e-169	ethylene-responsive transcription factor ERF113-like isoform X2 [Chenopodium quinoa]
miR172a_3	XM_021895337.1	3	NA	2.5	NA	XM_021895337.1	-	K19613|1|1.8e-51|206.8|aof:109842627|leucine-rich repeat protein SHOC2	XP_021751029.1	3.9e-233	plant intracellular Ras-group-related LRR protein 6-like [Chenopodium quinoa]
miR172a_3	XM_021895609.1	3	NA	2.5	NA	XM_021895609.1	-	K19613|1|2.2e-52|209.9|aof:109842627|leucine-rich repeat protein SHOC2	XP_021751301.1	6.6e-233	plant intracellular Ras-group-related LRR protein 6-like [Chenopodium quinoa]
miR172a_3	XM_021897122.1	2	NA	1	NA	XM_021897122.1	GO:0005634,GO:0005634,GO:0003677,GO:0003700,GO:0003677,GO:0003700,GO:0007275,GO:0006351,GO:0007275,GO:0006351,	K09284|1|0.0e+00|1167.5|cqi:110718284|AP2-like factor, euAP2 lineage	XP_021752814.1	0	floral homeotic protein APETALA 2-like [Chenopodium quinoa]
miR172a_3	XM_021900042.1	3	NA	2	NA	XM_021900042.1	-	-	XP_021755734.1	0	uncharacterized protein LOC110720943 [Chenopodium quinoa]
miR172a_4	XM_021858650.1	0	NA	0	NA	XM_021858650.1	GO:0005634,GO:0005634,GO:0003677,GO:0003700,GO:0003677,GO:0003700,GO:0007275,GO:0006351,GO:0007275,GO:0006351,	K09284|1|0.0e+00|1162.1|cqi:110682329|AP2-like factor, euAP2 lineage	XP_021714342.1	0	floral homeotic protein APETALA 2-like [Chenopodium quinoa]
miR172a_4	XM_021860086.1	0	NA	0	NA	XM_021860086.1	-	K09284|1|3.4e-306|1053.1|cqi:110683698|AP2-like factor, euAP2 lineage	XP_021715778.1	1.8e-305	floral homeotic protein APETALA 2-like isoform X1 [Chenopodium quinoa]
miR172a_4	XM_021860087.1	0	NA	0	NA	XM_021860087.1	-	K09284|1|3.2e-304|1046.6|cqi:110683698|AP2-like factor, euAP2 lineage	XP_021715779.1	6.9e-305	floral homeotic protein APETALA 2-like isoform X2 [Chenopodium quinoa]
miR172a_4	XM_021860088.1	0	NA	0	NA	XM_021860088.1	-	K09284|1|3.2e-304|1046.6|cqi:110683698|AP2-like factor, euAP2 lineage	XP_021715780.1	6.9e-305	floral homeotic protein APETALA 2-like isoform X3 [Chenopodium quinoa]
miR172a_4	XM_021860089.1	0	NA	0	NA	XM_021860089.1	-	K09284|1|1.7e-294|1014.2|cqi:110683698|AP2-like factor, euAP2 lineage	XP_021715781.1	8.8e-297	ethylene-responsive transcription factor RAP2-7-like isoform X4 [Chenopodium quinoa]
miR172a_4	XM_021860090.1	0	NA	0	NA	XM_021860090.1	-	K09284|1|2.1e-247|857.8|cqi:110683698|AP2-like factor, euAP2 lineage	XP_021715782.1	4.8e-250	AP2-like ethylene-responsive transcription factor TOE3 isoform X5 [Chenopodium quinoa]
miR172a_4	XM_021860091.1	0	NA	0	NA	XM_021860091.1	-	K09284|1|5.5e-248|859.8|cqi:110683698|AP2-like factor, euAP2 lineage	XP_021715783.1	1.4e-249	AP2-like ethylene-responsive transcription factor TOE3 isoform X6 [Chenopodium quinoa]
miR172a_4	XM_021888574.1	0	NA	0	NA	XM_021888574.1	-	K09284|1|7.0e-304|1045.4|cqi:110710297|AP2-like factor, euAP2 lineage	XP_021744266.1	3.7e-303	AP2-like ethylene-responsive transcription factor TOE3 isoform X1 [Chenopodium quinoa]
miR172a_4	XM_021888575.1	0	NA	0	NA	XM_021888575.1	-	K09284|1|6.6e-302|1038.9|cqi:110710297|AP2-like factor, euAP2 lineage	XP_021744267.1	1.4e-302	AP2-like ethylene-responsive transcription factor TOE3 isoform X2 [Chenopodium quinoa]
miR172a_4	XM_021888576.1	0	NA	0	NA	XM_021888576.1	-	K09284|1|6.6e-302|1038.9|cqi:110710297|AP2-like factor, euAP2 lineage	XP_021744268.1	1.4e-302	AP2-like ethylene-responsive transcription factor TOE3 isoform X3 [Chenopodium quinoa]
miR172a_4	XM_021888577.1	0	NA	0	NA	XM_021888577.1	-	K09284|1|3.5e-292|1006.5|cqi:110710297|AP2-like factor, euAP2 lineage	XP_021744269.1	1.8e-294	ethylene-responsive transcription factor RAP2-7-like isoform X4 [Chenopodium quinoa]
miR172a_4	XM_021888578.1	0	NA	0	NA	XM_021888578.1	-	K09284|1|3.3e-290|1000.0|cqi:110710297|AP2-like factor, euAP2 lineage	XP_021744270.1	6.9e-294	ethylene-responsive transcription factor RAP2-7-like isoform X5 [Chenopodium quinoa]
miR172a_4	XM_021891211.1	3	NA	2.5	NA	XM_021891211.1	-	K04733|1|0.0e+00|1090.1|cqi:110712762|interleukin-1 receptor-associated kinase 4 [EC:2.7.11.1]	XP_021746903.1	0	cysteine-rich receptor-like protein kinase 10 [Chenopodium quinoa]
miR172a_4	XM_021897122.1	0	NA	0	NA	XM_021897122.1	GO:0005634,GO:0005634,GO:0003677,GO:0003700,GO:0003677,GO:0003700,GO:0007275,GO:0006351,GO:0007275,GO:0006351,	K09284|1|0.0e+00|1167.5|cqi:110718284|AP2-like factor, euAP2 lineage	XP_021752814.1	0	floral homeotic protein APETALA 2-like [Chenopodium quinoa]
miR172a_4	XR_002510459.1	3	NA	1.5	NA	XR_002510459.1	-	-	XP_021773854.1	1.2e-20	organic cation/carnitine transporter 7-like [Chenopodium quinoa]
miR172a_4	XR_002510461.1	3	NA	1.5	NA	XR_002510461.1	-	-	XP_021773854.1	1.6e-10	organic cation/carnitine transporter 7-like [Chenopodium quinoa]
miR172a_4	XR_002510463.1	3	NA	1.5	NA	XR_002510463.1	-	-	-	-	-
miR172a_4	XR_002510464.1	3	NA	1.5	NA	XR_002510464.1	-	-	XP_021773854.1	1.1e-20	organic cation/carnitine transporter 7-like [Chenopodium quinoa]
miR172a_4	XR_002510465.1	3	NA	1.5	NA	XR_002510465.1	-	-	XP_021773854.1	1.1e-20	organic cation/carnitine transporter 7-like [Chenopodium quinoa]
miR172b-5p	XM_021864725.1	3	NA	1.8	NA	XM_021864725.1	-	K05658|1|0.0e+00|1144.8|dzi:111274727|ATP-binding cassette, subfamily B (MDR/TAP), member 1 [EC:7.6.2.2]	XP_021720417.1	0	uncharacterized protein LOC110688049 [Chenopodium quinoa]
miR172b-5p	XM_021866269.1	3.5	NA	2.2	NA	XM_021866269.1	-	K17604|1|2.2e-136|488.8|cqi:110707724|zinc finger SWIM domain-containing protein 3	XP_021721961.1	0	protein FAR-RED IMPAIRED RESPONSE 1-like [Chenopodium quinoa]
miR172b-5p	XM_021868059.1	3	NA	2.2	NA	XM_021868059.1	GO:0005737,GO:0005634,GO:0019773,GO:0004298,GO:0006511,	K02726|1|1.1e-127|459.1|cqi:110696055|20S proteasome subunit alpha 2 [EC:3.4.25.1]	XP_021729020.1	6e-127	proteasome subunit alpha type-2-A [Chenopodium quinoa]
miR172b-5p	XM_021868368.1	3.5	NA	2	NA	XM_021868368.1	-	-	XP_021724060.1	5.8e-60	uncharacterized protein LOC110691440 [Chenopodium quinoa]
miR172b-5p	XM_021869956.1	3	NA	1.5	NA	XM_021869956.1	-	K18626|1|2.7e-06|54.7|tcc:18599844|trichohyalin	XP_021725648.1	1.4e-72	protein MNN4-like [Chenopodium quinoa]
miR172b-5p	XM_021873328.1	3	NA	2.2	NA	XM_021873328.1	-	K02726|1|1.1e-127|459.1|cqi:110696055|20S proteasome subunit alpha 2 [EC:3.4.25.1]	XP_021729020.1	6.1e-127	proteasome subunit alpha type-2-A [Chenopodium quinoa]
miR172b-5p	XM_021875523.1	3	NA	2.5	NA	XM_021875523.1	-	K01595|1|2.8e-68|264.2|egu:105048129|phosphoenolpyruvate carboxylase [EC:4.1.1.31]	XP_021731215.1	0	protein SCAR2-like [Chenopodium quinoa]
miR172b-5p	XM_021875997.1	3.5	NA	2.2	NA	XM_021875997.1	-	K17925|1|0.0e+00|2021.5|cqi:110698553|sorting nexin-13	XP_021731689.1	0	uncharacterized protein LOC110698553 [Chenopodium quinoa]
miR172b-5p	XM_021878004.1	3.5	NA	2.5	NA	XM_021878004.1	-	K00130|1|1.5e-283|977.6|soe:110776899|betaine-aldehyde dehydrogenase [EC:1.2.1.8]	XP_021837164.1	8.1e-283	betaine aldehyde dehydrogenase, chloroplastic [Spinacia oleracea]
miR172b-5p	XM_021882808.1	3.5	NA	2.2	NA	XM_021882808.1	-	K17925|1|0.0e+00|2018.4|cqi:110704996|sorting nexin-13	XP_021738500.1	0	uncharacterized protein LOC110704996 [Chenopodium quinoa]
miR172b-5p	XM_021883366.1	2.5	NA	2	NA	XM_021883366.1	GO:0004722,	K17500|1|2.7e-69|267.3|cqi:110705481|integrin-linked kinase-associated serine/threonine phosphatase 2C [EC:3.1.3.16]!K17506|2|9.1e-65|252.3|ccaj:109816326|protein phosphatase 1L [EC:3.1.3.16]!K17505|5|2.0e-35|154.8|obr:102705594|protein phosphatase 1K [EC:3.1.3.16]	XP_021739058.1	1.4e-180	probable protein phosphatase 2C 72 isoform X1 [Chenopodium quinoa]
miR172b-5p	XM_021889213.1	3	NA	2.2	NA	XM_021889213.1	-	K17964|1|2.5e-52|210.3|sind:105159827|leucine-rich PPR motif-containing protein, mitochondrial!K17710|5|5.5e-36|156.0|smo:SELMODRAFT_103638|pentatricopeptide repeat domain-containing protein 1	XP_021744905.1	4.4e-289	pentatricopeptide repeat-containing protein At1g77360, mitochondrial-like [Chenopodium quinoa]
miR172b-5p	XM_021889382.1	3	NA	2	NA	XM_021889382.1	-	K15333|1|2.9e-76|290.0|nsy:104224633|tRNA guanosine-2'-O-methyltransferase [EC:2.1.1.34]!K12619|2|4.2e-38|163.3|ghi:107940264|5'-3' exoribonuclease 2 [EC:3.1.13.-]!K13199|3|7.6e-32|142.5|mtr:MTR_7g081660|plasminogen activator inhibitor 1 RNA-binding protein!K14568|4|1.2e-13|82.0|dct:110101229|rRNA small subunit pseudouridine methyltransferase Nep1 [EC:2.1.1.260]	XP_021745074.1	0	subtilisin-like protease SBT5.4 [Chenopodium quinoa]
miR172b-5p	XM_021892401.1	3.5	NA	2.5	NA	XM_021892401.1	-	K22155|1|0.0e+00|1136.7|cit:102620233|E3 ubiquitin-protein ligase Jade-2 [EC:2.3.2.27]!K11348|3|1.1e-206|723.4|nta:107765517|bromodomain and PHD finger-containing protein 1!K22156|4|1.0e-204|716.8|fve:105352829|protein Jade-3	XP_021748093.1	0	histone-lysine N-methyltransferase ATX3-like [Chenopodium quinoa]
miR172b-5p	XM_021893670.1	3	NA	2	NA	XM_021893670.1	-	K20667|1|2.4e-277|957.2|cqi:110715088|beta-amyrin 28-monooxygenase [EC:1.14.14.126]	XP_021749362.1	1.3e-276	beta-amyrin 28-oxidase-like [Chenopodium quinoa]
miR172b-5p	XM_021893676.1	3	NA	2	NA	XM_021893676.1	-	K20667|1|3.1e-277|956.8|cqi:110715095|beta-amyrin 28-monooxygenase [EC:1.14.14.126]	XP_021749368.1	1.6e-276	beta-amyrin 28-oxidase-like isoform X1 [Chenopodium quinoa]
miR172b-5p	XM_021899856.1	3	NA	1.5	NA	XM_021899856.1	-	K05349|1|8.5e-22|108.2|ini:109192820|beta-glucosidase [EC:3.2.1.21]!K08857|2|8.5e-14|81.6|ini:109193148|NIMA (never in mitosis gene a)-related kinase 1/4/5 [EC:2.7.11.1]!K18626|3|2.0e-07|60.5|tcc:18599844|trichohyalin	XP_021755548.1	3.6e-212	uncharacterized protein LOC110720816 [Chenopodium quinoa]
miR172b-5p	XM_021899990.1	3.5	NA	2.5	NA	XM_021899990.1	-	K19891|1|6.5e-84|314.7|aof:109833770|glucan endo-1,3-beta-glucosidase 1/2/3 [EC:3.2.1.39]!K19892|3|1.2e-82|310.5|cam:101507103|glucan endo-1,3-beta-glucosidase 4 [EC:3.2.1.39]	XP_021755682.1	8.3e-287	glucan endo-1,3-beta-glucosidase 14-like [Chenopodium quinoa]
miR172b-5p	XM_021903318.1	3.5	NA	2.5	NA	XM_021903318.1	-	K19891|1|3.1e-86|322.4|adu:107481045|glucan endo-1,3-beta-glucosidase 1/2/3 [EC:3.2.1.39]	XP_021759010.1	8.4e-292	glucan endo-1,3-beta-glucosidase 14-like [Chenopodium quinoa]
miR172b-5p	XM_021903645.1	3	NA	1.5	NA	XM_021903645.1	-	K04124|1|4.2e-30|135.6|dzi:111300330|gibberellin 3beta-dioxygenase [EC:1.14.11.15]	XP_021759337.1	1.7e-165	2-oxoglutarate-dependent dioxygenase DAO-like [Chenopodium quinoa]
miR172b-5p	XM_021907209.1	3.5	NA	2.5	NA	XM_021907209.1	-	K04733|1|3.8e-16|88.6|psom:113290296|interleukin-1 receptor-associated kinase 4 [EC:2.7.11.1]	XP_021762901.1	4e-213	uncharacterized protein LOC110727631 [Chenopodium quinoa]
miR172b-5p	XM_021907530.1	3.5	NA	2	NA	XM_021907530.1	-	K09286|1|1.2e-175|618.6|cqi:110727937|EREBP-like factor	XP_021763222.1	6.4e-175	ethylene-responsive transcription factor ERF073-like [Chenopodium quinoa]
miR172b-5p	XM_021912574.1	3	NA	2	NA	XM_021912574.1	-	-	XP_021768266.1	1.4e-170	uncharacterized protein At1g32220, chloroplastic-like [Chenopodium quinoa]
miR172b-5p	XM_021912768.1	3.5	NA	2.5	NA	XM_021912768.1	-	K14494|1|1.2e-33|148.3|dzi:111318061|DELLA protein	XP_021768460.1	0	scarecrow-like protein 6 isoform X1 [Chenopodium quinoa]
miR172b-5p	XM_021912769.1	3.5	NA	2.5	NA	XM_021912769.1	-	K14494|1|1.2e-33|148.3|dzi:111318061|DELLA protein	XP_021768461.1	0	scarecrow-like protein 6 isoform X2 [Chenopodium quinoa]
miR172b-5p	XM_021919531.1	3.5	NA	2	NA	XM_021919531.1	-	K09286|1|1.2e-175|618.6|cqi:110739078|EREBP-like factor	XP_021775223.1	6.6e-175	ethylene-responsive transcription factor ERF071-like [Chenopodium quinoa]
miR172b-5p	XR_002508084.1	2.5	NA	2	NA	XR_002508084.1	GO:0004722,	K17500|1|2.7e-69|267.3|cqi:110705481|integrin-linked kinase-associated serine/threonine phosphatase 2C [EC:3.1.3.16]!K17506|2|9.0e-65|252.3|ccaj:109816326|protein phosphatase 1L [EC:3.1.3.16]!K17505|5|2.0e-35|154.8|obr:102705594|protein phosphatase 1K [EC:3.1.3.16]	XP_021739058.1	1.4e-180	probable protein phosphatase 2C 72 isoform X1 [Chenopodium quinoa]
miR172b-5p	XR_002510087.1	3.5	NA	2.5	NA	XR_002510087.1	-	K22155|1|2.6e-252|874.8|cit:102620233|E3 ubiquitin-protein ligase Jade-2 [EC:2.3.2.27]!K22156|3|9.0e-205|716.8|fve:105352829|protein Jade-3	XP_021748093.1	0	histone-lysine N-methyltransferase ATX3-like [Chenopodium quinoa]
miR172b-5p	XR_002511042.1	3	NA	1.8	NA	XR_002511042.1	-	-	-	-	-
miR172b-5p	XR_002511359.1	3	NA	1.5	NA	XR_002511359.1	-	K05349|1|7.1e-26|121.7|ini:109192820|beta-glucosidase [EC:3.2.1.21]!K08857|2|7.1e-18|95.1|ini:109193148|NIMA (never in mitosis gene a)-related kinase 1/4/5 [EC:2.7.11.1]!K18626|3|1.9e-07|60.5|tcc:18599844|trichohyalin	XP_021755548.1	3.5e-212	uncharacterized protein LOC110720816 [Chenopodium quinoa]
miR172b-5p_3	XM_021864691.1	3.5	NA	2.5	NA	XM_021864691.1	-	K15271|1|2.3e-94|350.1|jcu:105641307|ATP-dependent DNA helicase HFM1/MER3 [EC:3.6.4.12]	XP_021720383.1	0	putative pentatricopeptide repeat-containing protein At1g77010, mitochondrial [Chenopodium quinoa]
miR172b-5p_3	XM_021864692.1	3.5	NA	2.5	NA	XM_021864692.1	-	K15271|1|2.2e-94|350.1|jcu:105641307|ATP-dependent DNA helicase HFM1/MER3 [EC:3.6.4.12]	XP_021720383.1	0	putative pentatricopeptide repeat-containing protein At1g77010, mitochondrial [Chenopodium quinoa]
miR172b-5p_3	XM_021864693.1	3.5	NA	2.5	NA	XM_021864693.1	-	K15271|1|2.4e-94|350.1|jcu:105641307|ATP-dependent DNA helicase HFM1/MER3 [EC:3.6.4.12]	XP_021720383.1	0	putative pentatricopeptide repeat-containing protein At1g77010, mitochondrial [Chenopodium quinoa]
miR172b-5p_3	XM_021868324.1	3.5	NA	2	NA	XM_021868324.1	-	K12866|1|1.2e-199|699.1|csv:101216276|WW domain-binding protein 11	XP_021724016.1	0	vegetative cell wall protein gp1-like [Chenopodium quinoa]
miR172b-5p_3	XM_021884338.1	3	NA	2.2	NA	XM_021884338.1	-	K00600|1|5.8e-267|922.5|sot:102591486|glycine hydroxymethyltransferase [EC:2.1.2.1]	XP_021740030.1	8.9e-298	serine hydroxymethyltransferase, mitochondrial [Chenopodium quinoa]
miR172b-5p_3	XM_021884339.1	3	NA	2.2	NA	XM_021884339.1	-	K00600|1|5.8e-267|922.5|sot:102591486|glycine hydroxymethyltransferase [EC:2.1.2.1]	XP_021740030.1	8.9e-298	serine hydroxymethyltransferase, mitochondrial [Chenopodium quinoa]
miR172b-5p_3	XM_021884340.1	3	NA	2.2	NA	XM_021884340.1	-	K00600|1|5.7e-267|922.5|sot:102591486|glycine hydroxymethyltransferase [EC:2.1.2.1]	XP_021740030.1	8.8e-298	serine hydroxymethyltransferase, mitochondrial [Chenopodium quinoa]
miR172b-5p_3	XM_021891997.1	3	NA	2.2	NA	XM_021891997.1	-	K00600|1|2.4e-266|920.6|sot:102591486|glycine hydroxymethyltransferase [EC:2.1.2.1]	XP_021747689.1	1.6e-297	serine hydroxymethyltransferase, mitochondrial-like [Chenopodium quinoa]
miR172b-5p_3	XM_021892002.1	3	NA	2.2	NA	XM_021892002.1	-	K00600|1|2.4e-266|920.6|sot:102591486|glycine hydroxymethyltransferase [EC:2.1.2.1]	XP_021747689.1	1.6e-297	serine hydroxymethyltransferase, mitochondrial-like [Chenopodium quinoa]
miR172b-5p_3	XM_021899990.1	2.5	NA	2	NA	XM_021899990.1	-	K19891|1|6.5e-84|314.7|aof:109833770|glucan endo-1,3-beta-glucosidase 1/2/3 [EC:3.2.1.39]!K19892|3|1.2e-82|310.5|cam:101507103|glucan endo-1,3-beta-glucosidase 4 [EC:3.2.1.39]	XP_021755682.1	8.3e-287	glucan endo-1,3-beta-glucosidase 14-like [Chenopodium quinoa]
miR172b-5p_3	XM_021901600.1	3.5	NA	2.5	NA	XM_021901600.1	-	K01802|1|4.0e-95|350.9|soe:110794805|peptidylprolyl isomerase [EC:5.2.1.8]	KNA20571.1	7.8e-105	hypothetical protein SOVF_051220 isoform A [Spinacia oleracea]
miR172b-5p_3	XM_021903318.1	2.5	NA	2	NA	XM_021903318.1	-	K19891|1|3.1e-86|322.4|adu:107481045|glucan endo-1,3-beta-glucosidase 1/2/3 [EC:3.2.1.39]	XP_021759010.1	8.4e-292	glucan endo-1,3-beta-glucosidase 14-like [Chenopodium quinoa]
miR172b-5p_3	XM_021906183.1	3.5	NA	2.5	NA	XM_021906183.1	-	K15271|1|1.2e-97|361.7|jcu:105641307|ATP-dependent DNA helicase HFM1/MER3 [EC:3.6.4.12]	XP_021761875.1	0	putative pentatricopeptide repeat-containing protein At1g77010, mitochondrial [Chenopodium quinoa]
miR172b-5p_3	XM_021906184.1	3.5	NA	2.5	NA	XM_021906184.1	-	K15271|1|1.2e-97|361.7|jcu:105641307|ATP-dependent DNA helicase HFM1/MER3 [EC:3.6.4.12]	XP_021761875.1	0	putative pentatricopeptide repeat-containing protein At1g77010, mitochondrial [Chenopodium quinoa]
miR172b-5p_3	XM_021913329.1	3.5	NA	2.5	NA	XM_021913329.1	-	K01802|1|1.8e-94|349.0|soe:110794805|peptidylprolyl isomerase [EC:5.2.1.8]	KNA20572.1	1.6e-101	hypothetical protein SOVF_051220 isoform B [Spinacia oleracea]
miR172b-5p_3	XR_002503580.1	3.5	NA	2.5	NA	XR_002503580.1	-	K02325|1|1.6e-15|87.4|cqi:110720800|DNA polymerase epsilon subunit 2 [EC:2.7.7.7]!K01802|2|1.0e-11|74.7|pxb:103948441|peptidylprolyl isomerase [EC:5.2.1.8]	XP_021753693.1	3.8e-36	uncharacterized protein LOC110719101 [Chenopodium quinoa]
miR172c-3p	XM_021858650.1	1	NA	0.5	NA	XM_021858650.1	GO:0005634,GO:0005634,GO:0003677,GO:0003700,GO:0003677,GO:0003700,GO:0007275,GO:0006351,GO:0007275,GO:0006351,	K09284|1|0.0e+00|1162.1|cqi:110682329|AP2-like factor, euAP2 lineage	XP_021714342.1	0	floral homeotic protein APETALA 2-like [Chenopodium quinoa]
miR172c-3p	XM_021860086.1	1	NA	0.5	NA	XM_021860086.1	-	K09284|1|3.4e-306|1053.1|cqi:110683698|AP2-like factor, euAP2 lineage	XP_021715778.1	1.8e-305	floral homeotic protein APETALA 2-like isoform X1 [Chenopodium quinoa]
miR172c-3p	XM_021860087.1	1	NA	0.5	NA	XM_021860087.1	-	K09284|1|3.2e-304|1046.6|cqi:110683698|AP2-like factor, euAP2 lineage	XP_021715779.1	6.9e-305	floral homeotic protein APETALA 2-like isoform X2 [Chenopodium quinoa]
miR172c-3p	XM_021860088.1	1	NA	0.5	NA	XM_021860088.1	-	K09284|1|3.2e-304|1046.6|cqi:110683698|AP2-like factor, euAP2 lineage	XP_021715780.1	6.9e-305	floral homeotic protein APETALA 2-like isoform X3 [Chenopodium quinoa]
miR172c-3p	XM_021860089.1	1	NA	0.5	NA	XM_021860089.1	-	K09284|1|1.7e-294|1014.2|cqi:110683698|AP2-like factor, euAP2 lineage	XP_021715781.1	8.8e-297	ethylene-responsive transcription factor RAP2-7-like isoform X4 [Chenopodium quinoa]
miR172c-3p	XM_021860090.1	1	NA	0.5	NA	XM_021860090.1	-	K09284|1|2.1e-247|857.8|cqi:110683698|AP2-like factor, euAP2 lineage	XP_021715782.1	4.8e-250	AP2-like ethylene-responsive transcription factor TOE3 isoform X5 [Chenopodium quinoa]
miR172c-3p	XM_021860091.1	1	NA	0.5	NA	XM_021860091.1	-	K09284|1|5.5e-248|859.8|cqi:110683698|AP2-like factor, euAP2 lineage	XP_021715783.1	1.4e-249	AP2-like ethylene-responsive transcription factor TOE3 isoform X6 [Chenopodium quinoa]
miR172c-3p	XM_021870718.1	2.5	NA	2	NA	XM_021870718.1	-	-	XP_021726410.1	0	uncharacterized protein LOC110693585 [Chenopodium quinoa]
miR172c-3p	XM_021883629.1	3.5	NA	2.5	NA	XM_021883629.1	GO:0043231,GO:0004519,GO:0003723,GO:0008270,GO:0009451,	K22565|1|4.1e-280|966.8|rcu:8269241|COMM domain containing 9!K06180|3|1.0e-113|414.1|sind:105165964|23S rRNA pseudouridine1911/1915/1917 synthase [EC:5.4.99.23]	XP_021739321.1	0	pentatricopeptide repeat-containing protein At5g50390, chloroplastic-like [Chenopodium quinoa]
miR172c-3p	XM_021884851.1	2.5	NA	2	NA	XM_021884851.1	-	-	XP_021740543.1	0	uncharacterized protein LOC110706874 isoform X1 [Chenopodium quinoa]
miR172c-3p	XM_021884852.1	2.5	NA	2	NA	XM_021884852.1	-	-	XP_021740544.1	0	uncharacterized protein LOC110706874 isoform X2 [Chenopodium quinoa]
miR172c-3p	XM_021888574.1	1	NA	0.5	NA	XM_021888574.1	-	K09284|1|7.0e-304|1045.4|cqi:110710297|AP2-like factor, euAP2 lineage	XP_021744266.1	3.7e-303	AP2-like ethylene-responsive transcription factor TOE3 isoform X1 [Chenopodium quinoa]
miR172c-3p	XM_021888575.1	1	NA	0.5	NA	XM_021888575.1	-	K09284|1|6.6e-302|1038.9|cqi:110710297|AP2-like factor, euAP2 lineage	XP_021744267.1	1.4e-302	AP2-like ethylene-responsive transcription factor TOE3 isoform X2 [Chenopodium quinoa]
miR172c-3p	XM_021888576.1	1	NA	0.5	NA	XM_021888576.1	-	K09284|1|6.6e-302|1038.9|cqi:110710297|AP2-like factor, euAP2 lineage	XP_021744268.1	1.4e-302	AP2-like ethylene-responsive transcription factor TOE3 isoform X3 [Chenopodium quinoa]
miR172c-3p	XM_021888577.1	1	NA	0.5	NA	XM_021888577.1	-	K09284|1|3.5e-292|1006.5|cqi:110710297|AP2-like factor, euAP2 lineage	XP_021744269.1	1.8e-294	ethylene-responsive transcription factor RAP2-7-like isoform X4 [Chenopodium quinoa]
miR172c-3p	XM_021888578.1	1	NA	0.5	NA	XM_021888578.1	-	K09284|1|3.3e-290|1000.0|cqi:110710297|AP2-like factor, euAP2 lineage	XP_021744270.1	6.9e-294	ethylene-responsive transcription factor RAP2-7-like isoform X5 [Chenopodium quinoa]
miR172c-3p	XM_021890360.1	3	NA	1.5	NA	XM_021890360.1	-	K12900|1|1.4e-28|130.6|lang:109341833|FUS-interacting serine-arginine-rich protein 1!K09286|3|6.1e-27|125.2|pmum:103333394|EREBP-like factor	XP_021746052.1	5.3e-170	ethylene-responsive transcription factor ERF113-like isoform X1 [Chenopodium quinoa]
miR172c-3p	XM_021890366.1	3	NA	1.5	NA	XM_021890366.1	-	K12900|1|1.4e-28|130.6|lang:109344099|FUS-interacting serine-arginine-rich protein 1!K09286|3|1.2e-27|127.5|pmum:103333394|EREBP-like factor	XP_021746058.1	1.5e-169	ethylene-responsive transcription factor ERF113-like isoform X2 [Chenopodium quinoa]
miR172c-3p	XM_021895337.1	3.5	NA	2.5	NA	XM_021895337.1	-	K19613|1|1.8e-51|206.8|aof:109842627|leucine-rich repeat protein SHOC2	XP_021751029.1	3.9e-233	plant intracellular Ras-group-related LRR protein 6-like [Chenopodium quinoa]
miR172c-3p	XM_021895609.1	3.5	NA	2.5	NA	XM_021895609.1	-	K19613|1|2.2e-52|209.9|aof:109842627|leucine-rich repeat protein SHOC2	XP_021751301.1	6.6e-233	plant intracellular Ras-group-related LRR protein 6-like [Chenopodium quinoa]
miR172c-3p	XM_021897122.1	1	NA	0.5	NA	XM_021897122.1	GO:0005634,GO:0005634,GO:0003677,GO:0003700,GO:0003677,GO:0003700,GO:0007275,GO:0006351,GO:0007275,GO:0006351,	K09284|1|0.0e+00|1167.5|cqi:110718284|AP2-like factor, euAP2 lineage	XP_021752814.1	0	floral homeotic protein APETALA 2-like [Chenopodium quinoa]
miR172c-3p	XM_021900042.1	3	NA	2	NA	XM_021900042.1	-	-	XP_021755734.1	0	uncharacterized protein LOC110720943 [Chenopodium quinoa]
miR172c-3p	XM_021907641.1	3.5	NA	1.8	NA	XM_021907641.1	-	K05747|1|7.7e-31|138.7|ppp:112285895|Wiskott-Aldrich syndrome protein!K11323|2|6.5e-06|55.8|vcn:VOLCADRAFT_121342|histone arginine demethylase JMJD6 [EC:1.14.11.-]	XP_021763333.1	0	uncharacterized protein LOC110728035 isoform X1 [Chenopodium quinoa]
miR172c-3p	XM_021907642.1	3.5	NA	1.8	NA	XM_021907642.1	-	K05747|1|7.7e-21|105.1|ppp:112285895|Wiskott-Aldrich syndrome protein	XP_021763334.1	3.7e-279	uncharacterized protein LOC110728035 isoform X2 [Chenopodium quinoa]
miR172c-3p	XM_021912787.1	3	NA	1.5	NA	XM_021912787.1	-	K00750|1|7.5e-105|384.0|gra:105792073|glycogenin [EC:2.4.1.186]!K22809|3|3.7e-27|125.9|smo:SELMODRAFT_62883|inositol phosphorylceramide glucuronosyltransferase 1 [EC:2.4.1.-]	XP_021768479.1	5.5e-287	putative glucuronosyltransferase PGSIP8 [Chenopodium quinoa]
miR172c-3p	XR_002504517.1	3.5	NA	2.5	NA	XR_002504517.1	-	-	XP_021720592.1	3e-271	fasciclin-like arabinogalactan protein 17 [Chenopodium quinoa]
miR172c-3p	XR_002504518.1	3.5	NA	2.5	NA	XR_002504518.1	-	-	XP_021720592.1	8.2e-261	fasciclin-like arabinogalactan protein 17 [Chenopodium quinoa]
miR172c_2	XM_021858650.1	1	NA	0.5	NA	XM_021858650.1	GO:0005634,GO:0005634,GO:0003677,GO:0003700,GO:0003677,GO:0003700,GO:0007275,GO:0006351,GO:0007275,GO:0006351,	K09284|1|0.0e+00|1162.1|cqi:110682329|AP2-like factor, euAP2 lineage	XP_021714342.1	0	floral homeotic protein APETALA 2-like [Chenopodium quinoa]
miR172c_2	XM_021860086.1	1	NA	0.5	NA	XM_021860086.1	-	K09284|1|3.4e-306|1053.1|cqi:110683698|AP2-like factor, euAP2 lineage	XP_021715778.1	1.8e-305	floral homeotic protein APETALA 2-like isoform X1 [Chenopodium quinoa]
miR172c_2	XM_021860087.1	1	NA	0.5	NA	XM_021860087.1	-	K09284|1|3.2e-304|1046.6|cqi:110683698|AP2-like factor, euAP2 lineage	XP_021715779.1	6.9e-305	floral homeotic protein APETALA 2-like isoform X2 [Chenopodium quinoa]
miR172c_2	XM_021860088.1	1	NA	0.5	NA	XM_021860088.1	-	K09284|1|3.2e-304|1046.6|cqi:110683698|AP2-like factor, euAP2 lineage	XP_021715780.1	6.9e-305	floral homeotic protein APETALA 2-like isoform X3 [Chenopodium quinoa]
miR172c_2	XM_021860089.1	1	NA	0.5	NA	XM_021860089.1	-	K09284|1|1.7e-294|1014.2|cqi:110683698|AP2-like factor, euAP2 lineage	XP_021715781.1	8.8e-297	ethylene-responsive transcription factor RAP2-7-like isoform X4 [Chenopodium quinoa]
miR172c_2	XM_021860090.1	1	NA	0.5	NA	XM_021860090.1	-	K09284|1|2.1e-247|857.8|cqi:110683698|AP2-like factor, euAP2 lineage	XP_021715782.1	4.8e-250	AP2-like ethylene-responsive transcription factor TOE3 isoform X5 [Chenopodium quinoa]
miR172c_2	XM_021860091.1	1	NA	0.5	NA	XM_021860091.1	-	K09284|1|5.5e-248|859.8|cqi:110683698|AP2-like factor, euAP2 lineage	XP_021715783.1	1.4e-249	AP2-like ethylene-responsive transcription factor TOE3 isoform X6 [Chenopodium quinoa]
miR172c_2	XM_021888574.1	1	NA	0.5	NA	XM_021888574.1	-	K09284|1|7.0e-304|1045.4|cqi:110710297|AP2-like factor, euAP2 lineage	XP_021744266.1	3.7e-303	AP2-like ethylene-responsive transcription factor TOE3 isoform X1 [Chenopodium quinoa]
miR172c_2	XM_021888575.1	1	NA	0.5	NA	XM_021888575.1	-	K09284|1|6.6e-302|1038.9|cqi:110710297|AP2-like factor, euAP2 lineage	XP_021744267.1	1.4e-302	AP2-like ethylene-responsive transcription factor TOE3 isoform X2 [Chenopodium quinoa]
miR172c_2	XM_021888576.1	1	NA	0.5	NA	XM_021888576.1	-	K09284|1|6.6e-302|1038.9|cqi:110710297|AP2-like factor, euAP2 lineage	XP_021744268.1	1.4e-302	AP2-like ethylene-responsive transcription factor TOE3 isoform X3 [Chenopodium quinoa]
miR172c_2	XM_021888577.1	1	NA	0.5	NA	XM_021888577.1	-	K09284|1|3.5e-292|1006.5|cqi:110710297|AP2-like factor, euAP2 lineage	XP_021744269.1	1.8e-294	ethylene-responsive transcription factor RAP2-7-like isoform X4 [Chenopodium quinoa]
miR172c_2	XM_021888578.1	1	NA	0.5	NA	XM_021888578.1	-	K09284|1|3.3e-290|1000.0|cqi:110710297|AP2-like factor, euAP2 lineage	XP_021744270.1	6.9e-294	ethylene-responsive transcription factor RAP2-7-like isoform X5 [Chenopodium quinoa]
miR172c_2	XM_021897122.1	1	NA	0.5	NA	XM_021897122.1	GO:0005634,GO:0005634,GO:0003677,GO:0003700,GO:0003677,GO:0003700,GO:0007275,GO:0006351,GO:0007275,GO:0006351,	K09284|1|0.0e+00|1167.5|cqi:110718284|AP2-like factor, euAP2 lineage	XP_021752814.1	0	floral homeotic protein APETALA 2-like [Chenopodium quinoa]
miR172c_2	XM_021907641.1	3.5	NA	1.8	NA	XM_021907641.1	-	K05747|1|7.7e-31|138.7|ppp:112285895|Wiskott-Aldrich syndrome protein!K11323|2|6.5e-06|55.8|vcn:VOLCADRAFT_121342|histone arginine demethylase JMJD6 [EC:1.14.11.-]	XP_021763333.1	0	uncharacterized protein LOC110728035 isoform X1 [Chenopodium quinoa]
miR172c_2	XM_021907642.1	3.5	NA	1.8	NA	XM_021907642.1	-	K05747|1|7.7e-21|105.1|ppp:112285895|Wiskott-Aldrich syndrome protein	XP_021763334.1	3.7e-279	uncharacterized protein LOC110728035 isoform X2 [Chenopodium quinoa]
miR172d-5p	XM_021861172.1	3	NA	2	NA	XM_021861172.1	GO:0009840,GO:0003677,	K10301|1|1.7e-09|67.0|cvr:CHLNCDRAFT_144212|F-box protein 21	XP_021716864.1	1.5e-192	clp protease adapter protein ClpF, chloroplastic-like isoform X1 [Chenopodium quinoa]
miR172d-5p	XM_021864691.1	3	NA	2	NA	XM_021864691.1	-	K15271|1|2.3e-94|350.1|jcu:105641307|ATP-dependent DNA helicase HFM1/MER3 [EC:3.6.4.12]	XP_021720383.1	0	putative pentatricopeptide repeat-containing protein At1g77010, mitochondrial [Chenopodium quinoa]
miR172d-5p	XM_021864692.1	3	NA	2	NA	XM_021864692.1	-	K15271|1|2.2e-94|350.1|jcu:105641307|ATP-dependent DNA helicase HFM1/MER3 [EC:3.6.4.12]	XP_021720383.1	0	putative pentatricopeptide repeat-containing protein At1g77010, mitochondrial [Chenopodium quinoa]
miR172d-5p	XM_021864693.1	3	NA	2	NA	XM_021864693.1	-	K15271|1|2.4e-94|350.1|jcu:105641307|ATP-dependent DNA helicase HFM1/MER3 [EC:3.6.4.12]	XP_021720383.1	0	putative pentatricopeptide repeat-containing protein At1g77010, mitochondrial [Chenopodium quinoa]
miR172d-5p	XM_021868324.1	2.5	NA	2	NA	XM_021868324.1	-	K12866|1|1.2e-199|699.1|csv:101216276|WW domain-binding protein 11	XP_021724016.1	0	vegetative cell wall protein gp1-like [Chenopodium quinoa]
miR172d-5p	XM_021869487.1	3	NA	2	NA	XM_021869487.1	GO:0005737,GO:0005737,GO:0005737,GO:0005737,GO:0005737,GO:0005524,GO:0005524,GO:0005524,GO:0005524,GO:0005524,GO:0042026,GO:0042026,GO:0042026,GO:0042026,GO:0042026,	K04077|1|2.2e-307|1057.0|soe:110803678|chaperonin GroEL	XP_021864904.1	1.1e-306	chaperonin CPN60, mitochondrial [Spinacia oleracea]
miR172d-5p	XM_021883627.1	3.5	NA	2.5	NA	XM_021883627.1	-	K00820|1|0.0e+00|1338.9|cqi:110705713|glucosamine---fructose-6-phosphate aminotransferase (isomerizing) [EC:2.6.1.16]	XP_021739319.1	0	glutamine--fructose-6-phosphate aminotransferase [isomerizing] 2-like isoform X1 [Chenopodium quinoa]
miR172d-5p	XM_021883628.1	3.5	NA	2.5	NA	XM_021883628.1	-	K00820|1|0.0e+00|1332.8|cqi:110705713|glucosamine---fructose-6-phosphate aminotransferase (isomerizing) [EC:2.6.1.16]	XP_021739320.1	0	glutamine--fructose-6-phosphate aminotransferase [isomerizing] 2-like isoform X2 [Chenopodium quinoa]
miR172d-5p	XM_021884338.1	3	NA	2	NA	XM_021884338.1	-	K00600|1|5.8e-267|922.5|sot:102591486|glycine hydroxymethyltransferase [EC:2.1.2.1]	XP_021740030.1	8.9e-298	serine hydroxymethyltransferase, mitochondrial [Chenopodium quinoa]
miR172d-5p	XM_021884339.1	3	NA	2	NA	XM_021884339.1	-	K00600|1|5.8e-267|922.5|sot:102591486|glycine hydroxymethyltransferase [EC:2.1.2.1]	XP_021740030.1	8.9e-298	serine hydroxymethyltransferase, mitochondrial [Chenopodium quinoa]
miR172d-5p	XM_021884340.1	3	NA	2	NA	XM_021884340.1	-	K00600|1|5.7e-267|922.5|sot:102591486|glycine hydroxymethyltransferase [EC:2.1.2.1]	XP_021740030.1	8.8e-298	serine hydroxymethyltransferase, mitochondrial [Chenopodium quinoa]
miR172d-5p	XM_021891997.1	3	NA	2	NA	XM_021891997.1	-	K00600|1|2.4e-266|920.6|sot:102591486|glycine hydroxymethyltransferase [EC:2.1.2.1]	XP_021747689.1	1.6e-297	serine hydroxymethyltransferase, mitochondrial-like [Chenopodium quinoa]
miR172d-5p	XM_021892002.1	3	NA	2	NA	XM_021892002.1	-	K00600|1|2.4e-266|920.6|sot:102591486|glycine hydroxymethyltransferase [EC:2.1.2.1]	XP_021747689.1	1.6e-297	serine hydroxymethyltransferase, mitochondrial-like [Chenopodium quinoa]
miR172d-5p	XM_021894948.1	3	NA	2	NA	XM_021894948.1	-	K01354|1|0.0e+00|1319.7|bvg:104902518|oligopeptidase B [EC:3.4.21.83]	XP_010688615.1	0	PREDICTED: uncharacterized protein LOC104902518 [Beta vulgaris subsp. vulgaris]
miR172d-5p	XM_021894949.1	3	NA	2	NA	XM_021894949.1	-	K01354|1|0.0e+00|1319.7|bvg:104902518|oligopeptidase B [EC:3.4.21.83]	XP_010688615.1	0	PREDICTED: uncharacterized protein LOC104902518 [Beta vulgaris subsp. vulgaris]
miR172d-5p	XM_021899612.1	3.5	NA	2.5	NA	XM_021899612.1	-	K10401|1|0.0e+00|1176.0|soe:110800849|kinesin family member 18/19	XP_021755304.1	0	kinesin-like protein KIN-6 isoform X1 [Chenopodium quinoa]
miR172d-5p	XM_021899613.1	3.5	NA	2.5	NA	XM_021899613.1	-	K10401|1|0.0e+00|1171.8|soe:110800849|kinesin family member 18/19	XP_021755305.1	0	kinesin-like protein KIN-6 isoform X2 [Chenopodium quinoa]
miR172d-5p	XM_021899990.1	3	NA	2.5	NA	XM_021899990.1	-	K19891|1|6.5e-84|314.7|aof:109833770|glucan endo-1,3-beta-glucosidase 1/2/3 [EC:3.2.1.39]!K19892|3|1.2e-82|310.5|cam:101507103|glucan endo-1,3-beta-glucosidase 4 [EC:3.2.1.39]	XP_021755682.1	8.3e-287	glucan endo-1,3-beta-glucosidase 14-like [Chenopodium quinoa]
miR172d-5p	XM_021900261.1	3.5	NA	2.5	NA	XM_021900261.1	-	K10401|1|0.0e+00|1201.4|soe:110800849|kinesin family member 18/19	XP_021755953.1	0	kinesin-like protein KIN-6 [Chenopodium quinoa]
miR172d-5p	XM_021903318.1	3	NA	2.5	NA	XM_021903318.1	-	K19891|1|3.1e-86|322.4|adu:107481045|glucan endo-1,3-beta-glucosidase 1/2/3 [EC:3.2.1.39]	XP_021759010.1	8.4e-292	glucan endo-1,3-beta-glucosidase 14-like [Chenopodium quinoa]
miR172d-5p	XM_021904438.1	3.5	NA	2.5	NA	XM_021904438.1	-	K02997|1|6.9e-06|55.1|cqi:110690411|small subunit ribosomal protein S9e	XP_021760130.1	1.8e-60	uncharacterized protein LOC110724956 isoform X1 [Chenopodium quinoa]
miR172d-5p	XM_021904439.1	3.5	NA	2.5	NA	XM_021904439.1	-	-	XP_021760131.1	3.9e-57	uncharacterized protein LOC110724956 isoform X2 [Chenopodium quinoa]
miR172d-5p	XM_021905206.1	3.5	NA	2	NA	XM_021905206.1	-	K05747|1|1.1e-13|83.2|pvu:PHAVU_004G097800g|Wiskott-Aldrich syndrome protein!K04733|3|1.5e-10|72.8|dzi:111276858|interleukin-1 receptor-associated kinase 4 [EC:2.7.11.1]	XP_021760898.1	0	uncharacterized protein LOC110725738 isoform X1 [Chenopodium quinoa]
miR172d-5p	XM_021905207.1	3.5	NA	2	NA	XM_021905207.1	-	K05747|1|1.1e-13|83.2|pvu:PHAVU_004G097800g|Wiskott-Aldrich syndrome protein!K04733|3|1.5e-10|72.8|dzi:111276858|interleukin-1 receptor-associated kinase 4 [EC:2.7.11.1]	XP_021760899.1	0	uncharacterized protein LOC110725738 isoform X2 [Chenopodium quinoa]
miR172d-5p	XM_021905208.1	3.5	NA	2	NA	XM_021905208.1	-	K05747|1|1.1e-13|83.2|pvu:PHAVU_004G097800g|Wiskott-Aldrich syndrome protein!K04733|3|1.5e-10|72.8|dzi:111276858|interleukin-1 receptor-associated kinase 4 [EC:2.7.11.1]	XP_021760900.1	0	uncharacterized protein LOC110725738 isoform X3 [Chenopodium quinoa]
miR172d-5p	XM_021905417.1	3	NA	2	NA	XM_021905417.1	GO:0009840,GO:0003677,	K10301|1|9.8e-11|71.2|cvr:CHLNCDRAFT_144212|F-box protein 21	XP_021761109.1	2.1e-192	clp protease adapter protein ClpF, chloroplastic-like [Chenopodium quinoa]
miR172d-5p	XM_021905418.1	3	NA	2	NA	XM_021905418.1	GO:0009840,GO:0003677,	K10301|1|9.8e-11|71.2|cvr:CHLNCDRAFT_144212|F-box protein 21	XP_021761109.1	2.1e-192	clp protease adapter protein ClpF, chloroplastic-like [Chenopodium quinoa]
miR172d-5p	XM_021906183.1	3	NA	2	NA	XM_021906183.1	-	K15271|1|1.2e-97|361.7|jcu:105641307|ATP-dependent DNA helicase HFM1/MER3 [EC:3.6.4.12]	XP_021761875.1	0	putative pentatricopeptide repeat-containing protein At1g77010, mitochondrial [Chenopodium quinoa]
miR172d-5p	XM_021906184.1	3	NA	2	NA	XM_021906184.1	-	K15271|1|1.2e-97|361.7|jcu:105641307|ATP-dependent DNA helicase HFM1/MER3 [EC:3.6.4.12]	XP_021761875.1	0	putative pentatricopeptide repeat-containing protein At1g77010, mitochondrial [Chenopodium quinoa]
miR172d-5p	XM_021906932.1	3	NA	2	NA	XM_021906932.1	GO:0005737,GO:0005737,GO:0005737,GO:0005737,GO:0005737,GO:0005524,GO:0005524,GO:0005524,GO:0005524,GO:0005524,GO:0042026,GO:0042026,GO:0042026,GO:0042026,GO:0042026,	K04077|1|2.1e-308|1060.4|soe:110803678|chaperonin GroEL	XP_021864904.1	1.1e-307	chaperonin CPN60, mitochondrial [Spinacia oleracea]
miR172d-5p	XR_002512092.1	3.5	NA	2.5	NA	XR_002512092.1	-	K02997|1|4.1e-06|55.8|cqi:110728597|small subunit ribosomal protein S9e	XP_021760130.1	3e-55	uncharacterized protein LOC110724956 isoform X1 [Chenopodium quinoa]
miR172d-5p_4	XM_021864691.1	3.5	NA	2.5	NA	XM_021864691.1	-	K15271|1|2.3e-94|350.1|jcu:105641307|ATP-dependent DNA helicase HFM1/MER3 [EC:3.6.4.12]	XP_021720383.1	0	putative pentatricopeptide repeat-containing protein At1g77010, mitochondrial [Chenopodium quinoa]
miR172d-5p_4	XM_021864692.1	3.5	NA	2.5	NA	XM_021864692.1	-	K15271|1|2.2e-94|350.1|jcu:105641307|ATP-dependent DNA helicase HFM1/MER3 [EC:3.6.4.12]	XP_021720383.1	0	putative pentatricopeptide repeat-containing protein At1g77010, mitochondrial [Chenopodium quinoa]
miR172d-5p_4	XM_021864693.1	3.5	NA	2.5	NA	XM_021864693.1	-	K15271|1|2.4e-94|350.1|jcu:105641307|ATP-dependent DNA helicase HFM1/MER3 [EC:3.6.4.12]	XP_021720383.1	0	putative pentatricopeptide repeat-containing protein At1g77010, mitochondrial [Chenopodium quinoa]
miR172d-5p_4	XM_021868324.1	3.5	NA	2	NA	XM_021868324.1	-	K12866|1|1.2e-199|699.1|csv:101216276|WW domain-binding protein 11	XP_021724016.1	0	vegetative cell wall protein gp1-like [Chenopodium quinoa]
miR172d-5p_4	XM_021874940.1	3.5	NA	2.5	NA	XM_021874940.1	-	K11804|1|1.4e-283|978.4|cqi:110697571|WD repeat-containing protein 42A	XP_021730632.1	7.4e-283	DDB1- and CUL4-associated factor 8 [Chenopodium quinoa]
miR172d-5p_4	XM_021874941.1	3.5	NA	2.5	NA	XM_021874941.1	-	K11804|1|1.4e-283|978.4|cqi:110697571|WD repeat-containing protein 42A	XP_021730632.1	7.4e-283	DDB1- and CUL4-associated factor 8 [Chenopodium quinoa]
miR172d-5p_4	XM_021874942.1	3.5	NA	2.5	NA	XM_021874942.1	-	K11804|1|1.3e-283|978.4|cqi:110697571|WD repeat-containing protein 42A	XP_021730632.1	6.9e-283	DDB1- and CUL4-associated factor 8 [Chenopodium quinoa]
miR172d-5p_4	XM_021884338.1	3	NA	2.2	NA	XM_021884338.1	-	K00600|1|5.8e-267|922.5|sot:102591486|glycine hydroxymethyltransferase [EC:2.1.2.1]	XP_021740030.1	8.9e-298	serine hydroxymethyltransferase, mitochondrial [Chenopodium quinoa]
miR172d-5p_4	XM_021884339.1	3	NA	2.2	NA	XM_021884339.1	-	K00600|1|5.8e-267|922.5|sot:102591486|glycine hydroxymethyltransferase [EC:2.1.2.1]	XP_021740030.1	8.9e-298	serine hydroxymethyltransferase, mitochondrial [Chenopodium quinoa]
miR172d-5p_4	XM_021884340.1	3	NA	2.2	NA	XM_021884340.1	-	K00600|1|5.7e-267|922.5|sot:102591486|glycine hydroxymethyltransferase [EC:2.1.2.1]	XP_021740030.1	8.8e-298	serine hydroxymethyltransferase, mitochondrial [Chenopodium quinoa]
miR172d-5p_4	XM_021887630.1	3.5	NA	1.8	NA	XM_021887630.1	-	K09419|1|3.8e-207|723.8|cqi:110709409|heat shock transcription factor, other eukaryote	XP_021743322.1	7.6e-230	heat stress transcription factor A-3-like isoform X3 [Chenopodium quinoa]
miR172d-5p_4	XM_021891997.1	3	NA	2.2	NA	XM_021891997.1	-	K00600|1|2.4e-266|920.6|sot:102591486|glycine hydroxymethyltransferase [EC:2.1.2.1]	XP_021747689.1	1.6e-297	serine hydroxymethyltransferase, mitochondrial-like [Chenopodium quinoa]
miR172d-5p_4	XM_021892002.1	3	NA	2.2	NA	XM_021892002.1	-	K00600|1|2.4e-266|920.6|sot:102591486|glycine hydroxymethyltransferase [EC:2.1.2.1]	XP_021747689.1	1.6e-297	serine hydroxymethyltransferase, mitochondrial-like [Chenopodium quinoa]
miR172d-5p_4	XM_021893767.1	3	NA	2.5	NA	XM_021893767.1	-	K00549|1|8.5e-203|710.3|boe:106315405|5-methyltetrahydropteroyltriglutamate--homocysteine methyltransferase [EC:2.1.1.14]!K04733|2|6.5e-86|322.0|ats:109761394|interleukin-1 receptor-associated kinase 4 [EC:2.7.11.1]!K19996|3|1.2e-10|72.0|oeu:111394400|phosphatidylinositol transfer protein SFH5!K02184|4|2.2e-09|67.8|aip:107619883|formin 2!K01051|5|1.1e-08|65.5|gmx:100808277|pectinesterase [EC:3.1.…	XP_021749459.1	0	FT-interacting protein 1-like [Chenopodium quinoa]
miR172d-5p_4	XM_021899990.1	3	NA	2	NA	XM_021899990.1	-	K19891|1|6.5e-84|314.7|aof:109833770|glucan endo-1,3-beta-glucosidase 1/2/3 [EC:3.2.1.39]!K19892|3|1.2e-82|310.5|cam:101507103|glucan endo-1,3-beta-glucosidase 4 [EC:3.2.1.39]	XP_021755682.1	8.3e-287	glucan endo-1,3-beta-glucosidase 14-like [Chenopodium quinoa]
miR172d-5p_4	XM_021901600.1	3.5	NA	2.5	NA	XM_021901600.1	-	K01802|1|4.0e-95|350.9|soe:110794805|peptidylprolyl isomerase [EC:5.2.1.8]	KNA20571.1	7.8e-105	hypothetical protein SOVF_051220 isoform A [Spinacia oleracea]
miR172d-5p_4	XM_021903318.1	3	NA	2	NA	XM_021903318.1	-	K19891|1|3.1e-86|322.4|adu:107481045|glucan endo-1,3-beta-glucosidase 1/2/3 [EC:3.2.1.39]	XP_021759010.1	8.4e-292	glucan endo-1,3-beta-glucosidase 14-like [Chenopodium quinoa]
miR172d-5p_4	XM_021904428.1	3	NA	1.5	NA	XM_021904428.1	-	K02150|1|5.1e-26|122.9|cpap:110812900|V-type H+-transporting ATPase subunit E	XP_021760120.1	0	TSL-kinase interacting protein 1-like isoform X1 [Chenopodium quinoa]
miR172d-5p_4	XM_021904429.1	3	NA	1.5	NA	XM_021904429.1	-	K02150|1|5.1e-26|122.9|cpap:110812900|V-type H+-transporting ATPase subunit E	XP_021760121.1	0	TSL-kinase interacting protein 1-like isoform X2 [Chenopodium quinoa]
miR172d-5p_4	XM_021904430.1	3	NA	1.5	NA	XM_021904430.1	-	K02150|1|5.1e-26|122.9|cpap:110812900|V-type H+-transporting ATPase subunit E	XP_021760122.1	0	TSL-kinase interacting protein 1-like isoform X3 [Chenopodium quinoa]
miR172d-5p_4	XM_021906183.1	3.5	NA	2.5	NA	XM_021906183.1	-	K15271|1|1.2e-97|361.7|jcu:105641307|ATP-dependent DNA helicase HFM1/MER3 [EC:3.6.4.12]	XP_021761875.1	0	putative pentatricopeptide repeat-containing protein At1g77010, mitochondrial [Chenopodium quinoa]
miR172d-5p_4	XM_021906184.1	3.5	NA	2.5	NA	XM_021906184.1	-	K15271|1|1.2e-97|361.7|jcu:105641307|ATP-dependent DNA helicase HFM1/MER3 [EC:3.6.4.12]	XP_021761875.1	0	putative pentatricopeptide repeat-containing protein At1g77010, mitochondrial [Chenopodium quinoa]
miR172d-5p_4	XM_021913329.1	3.5	NA	2.5	NA	XM_021913329.1	-	K01802|1|1.8e-94|349.0|soe:110794805|peptidylprolyl isomerase [EC:5.2.1.8]	KNA20572.1	1.6e-101	hypothetical protein SOVF_051220 isoform B [Spinacia oleracea]
miR172d-5p_4	XM_021918834.1	3.5	NA	2	NA	XM_021918834.1	-	K02150|1|2.6e-25|120.6|cpap:110812900|V-type H+-transporting ATPase subunit E	XP_021774526.1	0	TSL-kinase interacting protein 1-like isoform X1 [Chenopodium quinoa]
miR172d-5p_4	XM_021918835.1	3.5	NA	2	NA	XM_021918835.1	-	K02150|1|2.6e-25|120.6|cpap:110812900|V-type H+-transporting ATPase subunit E	XP_021774527.1	0	TSL-kinase interacting protein 1-like isoform X2 [Chenopodium quinoa]
miR172d-5p_4	XM_021918836.1	3.5	NA	2	NA	XM_021918836.1	-	K02150|1|2.6e-25|120.6|cpap:110812900|V-type H+-transporting ATPase subunit E	XP_021774528.1	0	TSL-kinase interacting protein 1-like isoform X3 [Chenopodium quinoa]
miR172d-5p_4	XM_021918837.1	3.5	NA	2	NA	XM_021918837.1	-	K02150|1|2.6e-25|120.6|cpap:110812900|V-type H+-transporting ATPase subunit E	XP_021774529.1	0	TSL-kinase interacting protein 1-like isoform X4 [Chenopodium quinoa]
miR172d-5p_4	XR_002503580.1	3.5	NA	2.5	NA	XR_002503580.1	-	K02325|1|1.6e-15|87.4|cqi:110720800|DNA polymerase epsilon subunit 2 [EC:2.7.7.7]!K01802|2|1.0e-11|74.7|pxb:103948441|peptidylprolyl isomerase [EC:5.2.1.8]	XP_021753693.1	3.8e-36	uncharacterized protein LOC110719101 [Chenopodium quinoa]
miR172d_2	XM_021858650.1	2	NA	1	NA	XM_021858650.1	GO:0005634,GO:0005634,GO:0003677,GO:0003700,GO:0003677,GO:0003700,GO:0007275,GO:0006351,GO:0007275,GO:0006351,	K09284|1|0.0e+00|1162.1|cqi:110682329|AP2-like factor, euAP2 lineage	XP_021714342.1	0	floral homeotic protein APETALA 2-like [Chenopodium quinoa]
miR172d_2	XM_021860086.1	2	NA	1	NA	XM_021860086.1	-	K09284|1|3.4e-306|1053.1|cqi:110683698|AP2-like factor, euAP2 lineage	XP_021715778.1	1.8e-305	floral homeotic protein APETALA 2-like isoform X1 [Chenopodium quinoa]
miR172d_2	XM_021860087.1	2	NA	1	NA	XM_021860087.1	-	K09284|1|3.2e-304|1046.6|cqi:110683698|AP2-like factor, euAP2 lineage	XP_021715779.1	6.9e-305	floral homeotic protein APETALA 2-like isoform X2 [Chenopodium quinoa]
miR172d_2	XM_021860088.1	2	NA	1	NA	XM_021860088.1	-	K09284|1|3.2e-304|1046.6|cqi:110683698|AP2-like factor, euAP2 lineage	XP_021715780.1	6.9e-305	floral homeotic protein APETALA 2-like isoform X3 [Chenopodium quinoa]
miR172d_2	XM_021860089.1	2	NA	1	NA	XM_021860089.1	-	K09284|1|1.7e-294|1014.2|cqi:110683698|AP2-like factor, euAP2 lineage	XP_021715781.1	8.8e-297	ethylene-responsive transcription factor RAP2-7-like isoform X4 [Chenopodium quinoa]
miR172d_2	XM_021860090.1	2	NA	1	NA	XM_021860090.1	-	K09284|1|2.1e-247|857.8|cqi:110683698|AP2-like factor, euAP2 lineage	XP_021715782.1	4.8e-250	AP2-like ethylene-responsive transcription factor TOE3 isoform X5 [Chenopodium quinoa]
miR172d_2	XM_021860091.1	2	NA	1	NA	XM_021860091.1	-	K09284|1|5.5e-248|859.8|cqi:110683698|AP2-like factor, euAP2 lineage	XP_021715783.1	1.4e-249	AP2-like ethylene-responsive transcription factor TOE3 isoform X6 [Chenopodium quinoa]
miR172d_2	XM_021888574.1	2	NA	1	NA	XM_021888574.1	-	K09284|1|7.0e-304|1045.4|cqi:110710297|AP2-like factor, euAP2 lineage	XP_021744266.1	3.7e-303	AP2-like ethylene-responsive transcription factor TOE3 isoform X1 [Chenopodium quinoa]
miR172d_2	XM_021888575.1	2	NA	1	NA	XM_021888575.1	-	K09284|1|6.6e-302|1038.9|cqi:110710297|AP2-like factor, euAP2 lineage	XP_021744267.1	1.4e-302	AP2-like ethylene-responsive transcription factor TOE3 isoform X2 [Chenopodium quinoa]
miR172d_2	XM_021888576.1	2	NA	1	NA	XM_021888576.1	-	K09284|1|6.6e-302|1038.9|cqi:110710297|AP2-like factor, euAP2 lineage	XP_021744268.1	1.4e-302	AP2-like ethylene-responsive transcription factor TOE3 isoform X3 [Chenopodium quinoa]
miR172d_2	XM_021888577.1	2	NA	1	NA	XM_021888577.1	-	K09284|1|3.5e-292|1006.5|cqi:110710297|AP2-like factor, euAP2 lineage	XP_021744269.1	1.8e-294	ethylene-responsive transcription factor RAP2-7-like isoform X4 [Chenopodium quinoa]
miR172d_2	XM_021888578.1	2	NA	1	NA	XM_021888578.1	-	K09284|1|3.3e-290|1000.0|cqi:110710297|AP2-like factor, euAP2 lineage	XP_021744270.1	6.9e-294	ethylene-responsive transcription factor RAP2-7-like isoform X5 [Chenopodium quinoa]
miR172d_2	XM_021897122.1	2	NA	1	NA	XM_021897122.1	GO:0005634,GO:0005634,GO:0003677,GO:0003700,GO:0003677,GO:0003700,GO:0007275,GO:0006351,GO:0007275,GO:0006351,	K09284|1|0.0e+00|1167.5|cqi:110718284|AP2-like factor, euAP2 lineage	XP_021752814.1	0	floral homeotic protein APETALA 2-like [Chenopodium quinoa]
miR172e-3p_1	XM_021858650.1	2	NA	1	NA	XM_021858650.1	GO:0005634,GO:0005634,GO:0003677,GO:0003700,GO:0003677,GO:0003700,GO:0007275,GO:0006351,GO:0007275,GO:0006351,	K09284|1|0.0e+00|1162.1|cqi:110682329|AP2-like factor, euAP2 lineage	XP_021714342.1	0	floral homeotic protein APETALA 2-like [Chenopodium quinoa]
miR172e-3p_1	XM_021860086.1	2	NA	1	NA	XM_021860086.1	-	K09284|1|3.4e-306|1053.1|cqi:110683698|AP2-like factor, euAP2 lineage	XP_021715778.1	1.8e-305	floral homeotic protein APETALA 2-like isoform X1 [Chenopodium quinoa]
miR172e-3p_1	XM_021860087.1	2	NA	1	NA	XM_021860087.1	-	K09284|1|3.2e-304|1046.6|cqi:110683698|AP2-like factor, euAP2 lineage	XP_021715779.1	6.9e-305	floral homeotic protein APETALA 2-like isoform X2 [Chenopodium quinoa]
miR172e-3p_1	XM_021860088.1	2	NA	1	NA	XM_021860088.1	-	K09284|1|3.2e-304|1046.6|cqi:110683698|AP2-like factor, euAP2 lineage	XP_021715780.1	6.9e-305	floral homeotic protein APETALA 2-like isoform X3 [Chenopodium quinoa]
miR172e-3p_1	XM_021860089.1	2	NA	1	NA	XM_021860089.1	-	K09284|1|1.7e-294|1014.2|cqi:110683698|AP2-like factor, euAP2 lineage	XP_021715781.1	8.8e-297	ethylene-responsive transcription factor RAP2-7-like isoform X4 [Chenopodium quinoa]
miR172e-3p_1	XM_021860090.1	2	NA	1	NA	XM_021860090.1	-	K09284|1|2.1e-247|857.8|cqi:110683698|AP2-like factor, euAP2 lineage	XP_021715782.1	4.8e-250	AP2-like ethylene-responsive transcription factor TOE3 isoform X5 [Chenopodium quinoa]
miR172e-3p_1	XM_021860091.1	2	NA	1	NA	XM_021860091.1	-	K09284|1|5.5e-248|859.8|cqi:110683698|AP2-like factor, euAP2 lineage	XP_021715783.1	1.4e-249	AP2-like ethylene-responsive transcription factor TOE3 isoform X6 [Chenopodium quinoa]
miR172e-3p_1	XM_021874129.1	2.5	NA	1.8	NA	XM_021874129.1	-	K19199|1|3.4e-35|152.9|cqi:110684701|histone-lysine N-methyltransferase SETD3 [EC:2.1.1.43]	XP_021729242.1	7.6e-118	uncharacterized protein LOC110696272 isoform X1 [Chenopodium quinoa]
miR172e-3p_1	XM_021879136.1	3.5	NA	2.2	NA	XM_021879136.1	-	K11420|1|1.3e-100|370.2|hbr:110647181|euchromatic histone-lysine N-methyltransferase [EC:2.1.1.43]!K11433|4|4.6e-50|202.2|zma:100273862|histone-lysine N-methyltransferase SETMAR [EC:2.1.1.43]	XP_021734828.1	0	probable inactive histone-lysine N-methyltransferase SUVR2 [Chenopodium quinoa]
miR172e-3p_1	XM_021882761.1	3	NA	1.8	NA	XM_021882761.1	-	-	XP_021738453.1	6.4e-275	APO protein 2, chloroplastic-like [Chenopodium quinoa]
miR172e-3p_1	XM_021885878.1	3.5	NA	2	NA	XM_021885878.1	GO:0016491,	K12355|1|1.2e-238|828.6|mesc:110603042|coniferyl-aldehyde dehydrogenase [EC:1.2.1.68]	XP_021596388.1	6.3e-238	aldehyde dehydrogenase family 2 member C4-like [Manihot esculenta]
miR172e-3p_1	XM_021888574.1	2	NA	1	NA	XM_021888574.1	-	K09284|1|7.0e-304|1045.4|cqi:110710297|AP2-like factor, euAP2 lineage	XP_021744266.1	3.7e-303	AP2-like ethylene-responsive transcription factor TOE3 isoform X1 [Chenopodium quinoa]
miR172e-3p_1	XM_021888575.1	2	NA	1	NA	XM_021888575.1	-	K09284|1|6.6e-302|1038.9|cqi:110710297|AP2-like factor, euAP2 lineage	XP_021744267.1	1.4e-302	AP2-like ethylene-responsive transcription factor TOE3 isoform X2 [Chenopodium quinoa]
miR172e-3p_1	XM_021888576.1	2	NA	1	NA	XM_021888576.1	-	K09284|1|6.6e-302|1038.9|cqi:110710297|AP2-like factor, euAP2 lineage	XP_021744268.1	1.4e-302	AP2-like ethylene-responsive transcription factor TOE3 isoform X3 [Chenopodium quinoa]
miR172e-3p_1	XM_021888577.1	2	NA	1	NA	XM_021888577.1	-	K09284|1|3.5e-292|1006.5|cqi:110710297|AP2-like factor, euAP2 lineage	XP_021744269.1	1.8e-294	ethylene-responsive transcription factor RAP2-7-like isoform X4 [Chenopodium quinoa]
miR172e-3p_1	XM_021888578.1	2	NA	1	NA	XM_021888578.1	-	K09284|1|3.3e-290|1000.0|cqi:110710297|AP2-like factor, euAP2 lineage	XP_021744270.1	6.9e-294	ethylene-responsive transcription factor RAP2-7-like isoform X5 [Chenopodium quinoa]
miR172e-3p_1	XM_021888579.1	2	NA	1	NA	XM_021888579.1	-	K09284|1|6.4e-247|855.9|cqi:110710297|AP2-like factor, euAP2 lineage	XP_021744271.1	1.5e-249	AP2-like ethylene-responsive transcription factor TOE3 isoform X6 [Chenopodium quinoa]
miR172e-3p_1	XM_021888580.1	2	NA	1	NA	XM_021888580.1	-	K09284|1|2.2e-247|857.4|cqi:110710297|AP2-like factor, euAP2 lineage	XP_021744272.1	4.3e-249	AP2-like ethylene-responsive transcription factor TOE3 isoform X7 [Chenopodium quinoa]
miR172e-3p_1	XM_021890360.1	3	NA	1.5	NA	XM_021890360.1	-	K12900|1|1.4e-28|130.6|lang:109341833|FUS-interacting serine-arginine-rich protein 1!K09286|3|6.1e-27|125.2|pmum:103333394|EREBP-like factor	XP_021746052.1	5.3e-170	ethylene-responsive transcription factor ERF113-like isoform X1 [Chenopodium quinoa]
miR172e-3p_1	XM_021890366.1	3	NA	1.5	NA	XM_021890366.1	-	K12900|1|1.4e-28|130.6|lang:109344099|FUS-interacting serine-arginine-rich protein 1!K09286|3|1.2e-27|127.5|pmum:103333394|EREBP-like factor	XP_021746058.1	1.5e-169	ethylene-responsive transcription factor ERF113-like isoform X2 [Chenopodium quinoa]
miR172e-3p_1	XM_021897122.1	2	NA	1	NA	XM_021897122.1	GO:0005634,GO:0005634,GO:0003677,GO:0003700,GO:0003677,GO:0003700,GO:0007275,GO:0006351,GO:0007275,GO:0006351,	K09284|1|0.0e+00|1167.5|cqi:110718284|AP2-like factor, euAP2 lineage	XP_021752814.1	0	floral homeotic protein APETALA 2-like [Chenopodium quinoa]
miR172e-3p_1	XM_021900042.1	3	NA	2	NA	XM_021900042.1	-	-	XP_021755734.1	0	uncharacterized protein LOC110720943 [Chenopodium quinoa]
miR172e-3p_1	XM_021906459.1	3.5	NA	1.8	NA	XM_021906459.1	-	-	XP_021762151.1	6.6e-242	fatty-acid-binding protein 2-like [Chenopodium quinoa]
miR172e-3p_1	XM_021906460.1	3.5	NA	1.8	NA	XM_021906460.1	-	-	XP_021762151.1	5.5e-242	fatty-acid-binding protein 2-like [Chenopodium quinoa]
miR172e-3p_1	XM_021906461.1	3.5	NA	1.8	NA	XM_021906461.1	-	-	XP_021762151.1	5.2e-242	fatty-acid-binding protein 2-like [Chenopodium quinoa]
miR172e-3p_1	XM_021907641.1	3.5	NA	2	NA	XM_021907641.1	-	K05747|1|7.7e-31|138.7|ppp:112285895|Wiskott-Aldrich syndrome protein!K11323|2|6.5e-06|55.8|vcn:VOLCADRAFT_121342|histone arginine demethylase JMJD6 [EC:1.14.11.-]	XP_021763333.1	0	uncharacterized protein LOC110728035 isoform X1 [Chenopodium quinoa]
miR172e-3p_1	XM_021907642.1	3.5	NA	2	NA	XM_021907642.1	-	K05747|1|7.7e-21|105.1|ppp:112285895|Wiskott-Aldrich syndrome protein	XP_021763334.1	3.7e-279	uncharacterized protein LOC110728035 isoform X2 [Chenopodium quinoa]
miR172e-3p_1	XM_021916052.1	3.5	NA	2.2	NA	XM_021916052.1	-	K11420|1|1.2e-114|416.8|hbr:110647181|euchromatic histone-lysine N-methyltransferase [EC:2.1.1.43]!K11433|4|2.0e-50|203.4|zma:100273862|histone-lysine N-methyltransferase SETMAR [EC:2.1.1.43]	XP_021771744.1	0	histone-lysine N-methyltransferase SUVR4 [Chenopodium quinoa]
miR172k	XM_021858650.1	3	NA	1.5	NA	XM_021858650.1	GO:0005634,GO:0005634,GO:0003677,GO:0003700,GO:0003677,GO:0003700,GO:0007275,GO:0006351,GO:0007275,GO:0006351,	K09284|1|0.0e+00|1162.1|cqi:110682329|AP2-like factor, euAP2 lineage	XP_021714342.1	0	floral homeotic protein APETALA 2-like [Chenopodium quinoa]
miR172k	XM_021860086.1	3	NA	1.5	NA	XM_021860086.1	-	K09284|1|3.4e-306|1053.1|cqi:110683698|AP2-like factor, euAP2 lineage	XP_021715778.1	1.8e-305	floral homeotic protein APETALA 2-like isoform X1 [Chenopodium quinoa]
miR172k	XM_021860087.1	3	NA	1.5	NA	XM_021860087.1	-	K09284|1|3.2e-304|1046.6|cqi:110683698|AP2-like factor, euAP2 lineage	XP_021715779.1	6.9e-305	floral homeotic protein APETALA 2-like isoform X2 [Chenopodium quinoa]
miR172k	XM_021860088.1	3	NA	1.5	NA	XM_021860088.1	-	K09284|1|3.2e-304|1046.6|cqi:110683698|AP2-like factor, euAP2 lineage	XP_021715780.1	6.9e-305	floral homeotic protein APETALA 2-like isoform X3 [Chenopodium quinoa]
miR172k	XM_021860089.1	3	NA	1.5	NA	XM_021860089.1	-	K09284|1|1.7e-294|1014.2|cqi:110683698|AP2-like factor, euAP2 lineage	XP_021715781.1	8.8e-297	ethylene-responsive transcription factor RAP2-7-like isoform X4 [Chenopodium quinoa]
miR172k	XM_021860090.1	3	NA	1.5	NA	XM_021860090.1	-	K09284|1|2.1e-247|857.8|cqi:110683698|AP2-like factor, euAP2 lineage	XP_021715782.1	4.8e-250	AP2-like ethylene-responsive transcription factor TOE3 isoform X5 [Chenopodium quinoa]
miR172k	XM_021860091.1	3	NA	1.5	NA	XM_021860091.1	-	K09284|1|5.5e-248|859.8|cqi:110683698|AP2-like factor, euAP2 lineage	XP_021715783.1	1.4e-249	AP2-like ethylene-responsive transcription factor TOE3 isoform X6 [Chenopodium quinoa]
miR172k	XM_021874129.1	3	NA	2	NA	XM_021874129.1	-	K19199|1|3.4e-35|152.9|cqi:110684701|histone-lysine N-methyltransferase SETD3 [EC:2.1.1.43]	XP_021729242.1	7.6e-118	uncharacterized protein LOC110696272 isoform X1 [Chenopodium quinoa]
miR172k	XM_021882761.1	3.5	NA	2	NA	XM_021882761.1	-	-	XP_021738453.1	6.4e-275	APO protein 2, chloroplastic-like [Chenopodium quinoa]
miR172k	XM_021888574.1	3	NA	1.5	NA	XM_021888574.1	-	K09284|1|7.0e-304|1045.4|cqi:110710297|AP2-like factor, euAP2 lineage	XP_021744266.1	3.7e-303	AP2-like ethylene-responsive transcription factor TOE3 isoform X1 [Chenopodium quinoa]
miR172k	XM_021888575.1	3	NA	1.5	NA	XM_021888575.1	-	K09284|1|6.6e-302|1038.9|cqi:110710297|AP2-like factor, euAP2 lineage	XP_021744267.1	1.4e-302	AP2-like ethylene-responsive transcription factor TOE3 isoform X2 [Chenopodium quinoa]
miR172k	XM_021888576.1	3	NA	1.5	NA	XM_021888576.1	-	K09284|1|6.6e-302|1038.9|cqi:110710297|AP2-like factor, euAP2 lineage	XP_021744268.1	1.4e-302	AP2-like ethylene-responsive transcription factor TOE3 isoform X3 [Chenopodium quinoa]
miR172k	XM_021888577.1	3	NA	1.5	NA	XM_021888577.1	-	K09284|1|3.5e-292|1006.5|cqi:110710297|AP2-like factor, euAP2 lineage	XP_021744269.1	1.8e-294	ethylene-responsive transcription factor RAP2-7-like isoform X4 [Chenopodium quinoa]
miR172k	XM_021888578.1	3	NA	1.5	NA	XM_021888578.1	-	K09284|1|3.3e-290|1000.0|cqi:110710297|AP2-like factor, euAP2 lineage	XP_021744270.1	6.9e-294	ethylene-responsive transcription factor RAP2-7-like isoform X5 [Chenopodium quinoa]
miR172k	XM_021897122.1	3	NA	1.5	NA	XM_021897122.1	GO:0005634,GO:0005634,GO:0003677,GO:0003700,GO:0003677,GO:0003700,GO:0007275,GO:0006351,GO:0007275,GO:0006351,	K09284|1|0.0e+00|1167.5|cqi:110718284|AP2-like factor, euAP2 lineage	XP_021752814.1	0	floral homeotic protein APETALA 2-like [Chenopodium quinoa]
miR319_1	XM_021861725.1	2.5	NA	2.2	NA	XM_021861725.1	-	-	XP_021717417.1	2.1e-207	transcription factor TCP4-like [Chenopodium quinoa]
miR319_1	XM_021863548.1	3.5	NA	2.5	NA	XM_021863548.1	-	K18327|1|1.2e-153|545.4|cqi:110686936|RNA exonuclease 4 [EC:3.1.-.-]	XP_021719240.1	6.4e-153	RNA exonuclease 4-like [Chenopodium quinoa]
miR319_1	XM_021872930.1	3.5	NA	2	NA	XM_021872930.1	-	-	XP_021728622.1	1.7e-226	uncharacterized protein LOC110695702 [Chenopodium quinoa]
miR319_1	XM_021878602.1	2	NA	1	NA	XM_021878602.1	-	K09422|1|0.0e+00|1132.5|cqi:110701023|transcription factor MYB, plant	XP_021734294.1	0	transcription factor GAMYB-like [Chenopodium quinoa]
miR319_1	XM_021878603.1	2	NA	1	NA	XM_021878603.1	-	K09422|1|0.0e+00|1132.5|cqi:110701023|transcription factor MYB, plant	XP_021734294.1	0	transcription factor GAMYB-like [Chenopodium quinoa]
miR319_1	XM_021878604.1	2	NA	1	NA	XM_021878604.1	-	K09422|1|0.0e+00|1132.5|cqi:110701023|transcription factor MYB, plant	XP_021734294.1	0	transcription factor GAMYB-like [Chenopodium quinoa]
miR319_1	XM_021879550.1	3	NA	2	NA	XM_021879550.1	-	K05399|1|2.0e-300|1033.9|cqi:110701937|lipopolysaccharide-binding protein	XP_021735242.1	1.1e-299	putative BPI/LBP family protein At1g04970 isoform X1 [Chenopodium quinoa]
miR319_1	XM_021879551.1	3	NA	2	NA	XM_021879551.1	-	K05399|1|9.3e-213|742.3|cqi:110701937|lipopolysaccharide-binding protein	XP_021735242.1	4.9e-212	putative BPI/LBP family protein At1g04970 isoform X1 [Chenopodium quinoa]
miR319_1	XM_021881575.1	2.5	NA	2.5	NA	XM_021881575.1	-	-	XP_021737267.1	0	transcription factor TCP2-like [Chenopodium quinoa]
miR319_1	XM_021881631.1	2.5	NA	2.5	NA	XM_021881631.1	-	-	XP_021737267.1	0	transcription factor TCP2-like [Chenopodium quinoa]
miR319_1	XM_021881685.1	2.5	NA	2.5	NA	XM_021881685.1	-	-	XP_021737267.1	0	transcription factor TCP2-like [Chenopodium quinoa]
miR319_1	XM_021881751.1	2.5	NA	2.5	NA	XM_021881751.1	-	-	XP_021737267.1	0	transcription factor TCP2-like [Chenopodium quinoa]
miR319_1	XM_021881803.1	2.5	NA	2.5	NA	XM_021881803.1	-	-	XP_021737267.1	0	transcription factor TCP2-like [Chenopodium quinoa]
miR319_1	XM_021881844.1	2.5	NA	2.5	NA	XM_021881844.1	-	-	XP_021737267.1	0	transcription factor TCP2-like [Chenopodium quinoa]
miR319_1	XM_021881887.1	2.5	NA	2.5	NA	XM_021881887.1	-	-	XP_021737267.1	0	transcription factor TCP2-like [Chenopodium quinoa]
miR319_1	XM_021901208.1	2.5	NA	2.2	NA	XM_021901208.1	-	-	XP_021756900.1	4.3e-208	transcription factor TCP4-like [Chenopodium quinoa]
miR319_1	XM_021908154.1	2.5	NA	2.5	NA	XM_021908154.1	-	-	XP_021763846.1	0	transcription factor TCP2-like [Chenopodium quinoa]
miR319_1	XM_021908155.1	2.5	NA	2.5	NA	XM_021908155.1	-	-	XP_021763846.1	0	transcription factor TCP2-like [Chenopodium quinoa]
miR319_1	XM_021908156.1	2.5	NA	2.5	NA	XM_021908156.1	-	-	XP_021763846.1	0	transcription factor TCP2-like [Chenopodium quinoa]
miR319_1	XM_021908157.1	2.5	NA	2.5	NA	XM_021908157.1	-	-	XP_021763846.1	0	transcription factor TCP2-like [Chenopodium quinoa]
miR319_1	XM_021913218.1	3.5	NA	2	NA	XM_021913218.1	-	K08597|1|1.5e-06|58.2|bvg:104887063|sentrin-specific protease 8 [EC:3.4.22.68]	XP_021768909.1	0	uncharacterized protein LOC110733208 isoform X1 [Chenopodium quinoa]
miR319_1	XM_021914082.1	3.5	NA	2	NA	XM_021914082.1	-	K08597|1|1.3e-08|64.3|bvg:104887063|sentrin-specific protease 8 [EC:3.4.22.68]	XP_021768910.1	1.7e-227	uncharacterized protein LOC110733208 isoform X2 [Chenopodium quinoa]
miR319_1	XM_021916555.1	2	NA	1	NA	XM_021916555.1	-	K09422|1|0.0e+00|1144.8|cqi:110736354|transcription factor MYB, plant	XP_021772247.1	0	transcription factor GAMYB-like [Chenopodium quinoa]
miR319_1	XM_021916556.1	2	NA	1	NA	XM_021916556.1	-	K09422|1|0.0e+00|1144.8|cqi:110736354|transcription factor MYB, plant	XP_021772247.1	0	transcription factor GAMYB-like [Chenopodium quinoa]
miR319_1	XM_021918063.1	3.5	NA	2.5	NA	XM_021918063.1	-	K18327|1|1.7e-153|545.0|cqi:110737732|RNA exonuclease 4 [EC:3.1.-.-]	XP_021773755.1	9.3e-153	RNA exonuclease 4-like isoform X1 [Chenopodium quinoa]
miR319_1	XM_021918064.1	3.5	NA	2.5	NA	XM_021918064.1	-	K18327|1|9.5e-133|476.1|cqi:110737732|RNA exonuclease 4 [EC:3.1.-.-]	XP_021773756.1	5.5e-139	RNA exonuclease 4-like isoform X2 [Chenopodium quinoa]
miR319_1	XR_002504048.1	3.5	NA	2	NA	XR_002504048.1	-	-	XP_021768909.1	1.9e-38	uncharacterized protein LOC110733208 isoform X1 [Chenopodium quinoa]
miR319_1	XR_002504049.1	3.5	NA	2	NA	XR_002504049.1	-	-	XP_021768909.1	5.5e-39	uncharacterized protein LOC110733208 isoform X1 [Chenopodium quinoa]
miR319a	XM_021872930.1	2.5	NA	2.5	NA	XM_021872930.1	-	-	XP_021728622.1	1.7e-226	uncharacterized protein LOC110695702 [Chenopodium quinoa]
miR319a	XM_021878602.1	3	NA	1.5	NA	XM_021878602.1	-	K09422|1|0.0e+00|1132.5|cqi:110701023|transcription factor MYB, plant	XP_021734294.1	0	transcription factor GAMYB-like [Chenopodium quinoa]
miR319a	XM_021878603.1	3	NA	1.5	NA	XM_021878603.1	-	K09422|1|0.0e+00|1132.5|cqi:110701023|transcription factor MYB, plant	XP_021734294.1	0	transcription factor GAMYB-like [Chenopodium quinoa]
miR319a	XM_021878604.1	3	NA	1.5	NA	XM_021878604.1	-	K09422|1|0.0e+00|1132.5|cqi:110701023|transcription factor MYB, plant	XP_021734294.1	0	transcription factor GAMYB-like [Chenopodium quinoa]
miR319a	XM_021879550.1	3.5	NA	2.5	NA	XM_021879550.1	-	K05399|1|2.0e-300|1033.9|cqi:110701937|lipopolysaccharide-binding protein	XP_021735242.1	1.1e-299	putative BPI/LBP family protein At1g04970 isoform X1 [Chenopodium quinoa]
miR319a	XM_021879551.1	3.5	NA	2.5	NA	XM_021879551.1	-	K05399|1|9.3e-213|742.3|cqi:110701937|lipopolysaccharide-binding protein	XP_021735242.1	4.9e-212	putative BPI/LBP family protein At1g04970 isoform X1 [Chenopodium quinoa]
miR319a	XM_021913218.1	3	NA	2.5	NA	XM_021913218.1	-	K08597|1|1.5e-06|58.2|bvg:104887063|sentrin-specific protease 8 [EC:3.4.22.68]	XP_021768909.1	0	uncharacterized protein LOC110733208 isoform X1 [Chenopodium quinoa]
miR319a	XM_021914082.1	1.5	NA	2.5	NA	XM_021914082.1	-	K08597|1|1.3e-08|64.3|bvg:104887063|sentrin-specific protease 8 [EC:3.4.22.68]	XP_021768910.1	1.7e-227	uncharacterized protein LOC110733208 isoform X2 [Chenopodium quinoa]
miR319a	XM_021916555.1	3	NA	1.5	NA	XM_021916555.1	-	K09422|1|0.0e+00|1144.8|cqi:110736354|transcription factor MYB, plant	XP_021772247.1	0	transcription factor GAMYB-like [Chenopodium quinoa]
miR319a	XM_021916556.1	3	NA	1.5	NA	XM_021916556.1	-	K09422|1|0.0e+00|1144.8|cqi:110736354|transcription factor MYB, plant	XP_021772247.1	0	transcription factor GAMYB-like [Chenopodium quinoa]
miR319a-3p	XM_021872930.1	2.5	NA	2.5	NA	XM_021872930.1	-	-	XP_021728622.1	1.7e-226	uncharacterized protein LOC110695702 [Chenopodium quinoa]
miR319a-3p	XM_021878602.1	3	NA	1.5	NA	XM_021878602.1	-	K09422|1|0.0e+00|1132.5|cqi:110701023|transcription factor MYB, plant	XP_021734294.1	0	transcription factor GAMYB-like [Chenopodium quinoa]
miR319a-3p	XM_021878603.1	3	NA	1.5	NA	XM_021878603.1	-	K09422|1|0.0e+00|1132.5|cqi:110701023|transcription factor MYB, plant	XP_021734294.1	0	transcription factor GAMYB-like [Chenopodium quinoa]
miR319a-3p	XM_021878604.1	3	NA	1.5	NA	XM_021878604.1	-	K09422|1|0.0e+00|1132.5|cqi:110701023|transcription factor MYB, plant	XP_021734294.1	0	transcription factor GAMYB-like [Chenopodium quinoa]
miR319a-3p	XM_021913218.1	3	NA	2.5	NA	XM_021913218.1	-	K08597|1|1.5e-06|58.2|bvg:104887063|sentrin-specific protease 8 [EC:3.4.22.68]	XP_021768909.1	0	uncharacterized protein LOC110733208 isoform X1 [Chenopodium quinoa]
miR319a-3p	XM_021914082.1	1.5	NA	2.5	NA	XM_021914082.1	-	K08597|1|1.3e-08|64.3|bvg:104887063|sentrin-specific protease 8 [EC:3.4.22.68]	XP_021768910.1	1.7e-227	uncharacterized protein LOC110733208 isoform X2 [Chenopodium quinoa]
miR319a-3p	XM_021916555.1	3	NA	1.5	NA	XM_021916555.1	-	K09422|1|0.0e+00|1144.8|cqi:110736354|transcription factor MYB, plant	XP_021772247.1	0	transcription factor GAMYB-like [Chenopodium quinoa]
miR319a-3p	XM_021916556.1	3	NA	1.5	NA	XM_021916556.1	-	K09422|1|0.0e+00|1144.8|cqi:110736354|transcription factor MYB, plant	XP_021772247.1	0	transcription factor GAMYB-like [Chenopodium quinoa]
miR319a_1	XM_021872930.1	2.5	NA	2.5	NA	XM_021872930.1	-	-	XP_021728622.1	1.7e-226	uncharacterized protein LOC110695702 [Chenopodium quinoa]
miR319a_1	XM_021913218.1	3	NA	2.5	NA	XM_021913218.1	-	K08597|1|1.5e-06|58.2|bvg:104887063|sentrin-specific protease 8 [EC:3.4.22.68]	XP_021768909.1	0	uncharacterized protein LOC110733208 isoform X1 [Chenopodium quinoa]
miR319a_1	XM_021914082.1	1.5	NA	2.5	NA	XM_021914082.1	-	K08597|1|1.3e-08|64.3|bvg:104887063|sentrin-specific protease 8 [EC:3.4.22.68]	XP_021768910.1	1.7e-227	uncharacterized protein LOC110733208 isoform X2 [Chenopodium quinoa]
miR319b-5p_2	XM_021864152.1	3	NA	2.2	NA	XM_021864152.1	-	K21442|1|9.3e-34|147.5|vcn:VOLCADRAFT_120788|ankyrin repeat domain-containing protein 54!K21433|2|6.2e-30|134.8|mis:MICPUN_105532|ankyrin repeat domain-containing protein 1!K06694|3|2.3e-16|89.7|han:110921539|26S proteasome non-ATPase regulatory subunit 10	XP_021719844.1	1.1e-194	ankyrin repeat domain-containing protein 2B-like [Chenopodium quinoa]
miR319b-5p_2	XM_021874380.1	3	NA	2	NA	XM_021874380.1	GO:0005847,GO:0006379,GO:0006378,	K14402|1|0.0e+00|1394.8|bvg:104888540|cleavage and polyadenylation specificity factor subunit 2	XP_021730072.1	0	cleavage and polyadenylation specificity factor subunit 2-like [Chenopodium quinoa]
miR319b-5p_2	XM_021881693.1	2.5	NA	2	NA	XM_021881693.1	-	K14165|1|0.0e+00|1828.9|cqi:110703899|atypical dual specificity phosphatase [EC:3.1.3.16 3.1.3.48]	XP_021737385.1	0	dual specificity protein phosphatase PHS1-like [Chenopodium quinoa]
miR319b-5p_2	XM_021889007.1	3	NA	2.5	NA	XM_021889007.1	-	K20478|1|0.0e+00|2016.1|bvg:104889437|golgin subfamily B member 1	XP_021744699.1	0	uncharacterized protein LOC110710678 [Chenopodium quinoa]
miR319b-5p_2	XM_021909414.1	3	NA	2	NA	XM_021909414.1	GO:0005847,GO:0006379,GO:0006378,	K14402|1|0.0e+00|1389.0|bvg:104888540|cleavage and polyadenylation specificity factor subunit 2	XP_021765106.1	0	cleavage and polyadenylation specificity factor subunit 2-like [Chenopodium quinoa]
miR319b-5p_2	XM_021915481.1	3	NA	2.5	NA	XM_021915481.1	-	K10403|1|0.0e+00|1368.2|cqi:110735302|kinesin family member 22	XP_021771173.1	0	kinesin-like protein KIN-10B isoform X1 [Chenopodium quinoa]
[truncated: 486 more rows]
