# Supplementary material for: Transcriptome and Small RNA Sequencing Reveals the Basis of Response to Salinity, Alkalinity and Hypertonia in Quinoa (Chenopodium quinoa Willd.)
Source: Int J Mol Sci. 2023 Jul 22;24(14):11789. doi: 10.3390/ijms241411789 (PMC10380837; doi:10.3390/ijms241411789)
Supplement: Supplementary file 1 [file ijms-24-11789-s001.zip › Tab.S10 The gene ID of miRNA targets belonging to the seven DEM groups.xls]

## Sheet: saline only
XM_021860087.1	LOC110683698
XM_021877051.1	LOC110699556
XM_021860090.1	LOC110683698
XM_021912012.1	LOC110732080
XM_021860091.1	LOC110683698
XM_021877046.1	LOC110699556
XM_021911995.1	LOC110732080
XM_021860086.1	LOC110683698
XM_021877049.1	LOC110699556
XM_021888574.1	LOC110710297
XM_021912018.1	LOC110732080
XM_021877050.1	LOC110699556
XM_021880795.1	LOC110703037
XM_021888575.1	LOC110710297
XM_021912003.1	LOC110732080
XM_021918836.1	LOC110738428
XM_021857955.1	LOC110681826
XM_021858650.1	LOC110682329
XM_021859348.1	LOC110683013
XM_021860810.1	LOC110684358
XM_021862485.1	LOC110685928
XM_021862675.1	LOC110686092
XM_021862798.1	LOC110686199
XM_021862940.1	LOC110686333
XM_021864800.1	LOC110688113
XM_021865275.1	LOC110688512
XM_021867384.1	LOC110690526
XM_021867403.1	LOC110690544
XM_021868312.1	LOC110691386
XM_021868324.1	LOC110691396
XM_021868848.1	LOC110691876
XM_021869487.1	LOC110692481
XM_021870202.1	LOC110693075
XM_021870575.1	LOC110693464
XM_021870789.1	LOC110693642
XM_021871621.1	LOC110694450
XM_021871804.1	LOC110694643
XM_021872930.1	LOC110695702
XM_021874129.1	LOC110696788
XM_021876288.1	LOC110698765
XM_021877045.1	LOC110699556
XM_021878604.1	LOC110701023
XM_021879550.1	LOC110701937
XM_021880233.1	LOC110702513
XM_021880796.1	LOC110703037
XM_021881600.1	LOC110703814
XM_021882455.1	LOC110704639
XM_021883446.1	LOC110705556
XM_021883580.1	LOC110705677
XM_021883628.1	LOC110705713
XM_021883629.1	LOC110705714
XM_021884340.1	LOC110706418
XM_021884740.1	LOC110706762
XM_021886295.1	LOC110708210
XM_021886386.1	LOC110708290
XM_021889305.1	LOC110710965
XM_021889412.1	LOC110711039
XM_021889619.1	LOC110711240
XM_021890249.1	LOC110711821
XM_021890366.1	LOC110711921
XM_021892002.1	LOC110713544
XM_021893767.1	LOC110715197
XM_021894193.1	LOC110715603
XM_021894366.1	LOC110715758
XM_021894998.1	LOC110716385
XM_021895337.1	LOC110716694
XM_021895609.1	LOC110716957
XM_021897122.1	LOC110718284
XM_021898466.1	LOC110719513
XM_021899613.1	LOC110720573
XM_021899990.1	LOC110720904
XM_021900042.1	LOC110720943
XM_021900261.1	LOC110721132
XM_021900841.1	LOC110721644
XM_021901493.1	LOC110722224
XM_021901600.1	LOC110722327
XM_021902101.1	LOC110722801
XM_021902385.1	LOC110723092
XM_021903318.1	LOC110723906
XM_021904429.1	LOC110724949
XM_021904439.1	LOC110724956
XM_021905208.1	LOC110725738
XM_021905246.1	LOC110725775
XM_021905418.1	LOC110725944
XM_021906183.1	LOC110726709
XM_021906932.1	LOC110727366
XM_021907822.1	LOC110728169
XM_021909638.1	LOC110729853
XM_021911394.1	LOC110731539
XM_021912025.1	LOC110732080
XM_021912768.1	LOC110732770
XM_021913218.1	LOC110733208
XM_021913329.1	LOC110733310
XM_021914082.1	LOC110734025
XM_021914710.1	LOC110734541
XM_021915984.1	LOC110735801
XM_021916555.1	LOC110736354
XM_021917625.1	LOC110737279
XM_021918797.1	LOC110738407
XM_021918835.1	LOC110738428
XM_021857956.1	LOC110681826
XM_021859349.1	LOC110683013
XM_021860089.1	LOC110683698
XM_021861172.1	LOC110684732
XM_021862676.1	LOC110686092
XM_021862925.1	LOC110686333
XM_021863375.1	LOC110686771
XM_021864565.1	LOC110687919
XM_021864693.1	LOC110688026
XM_021864799.1	LOC110688113
XM_021865473.1	LOC110688713
XM_021867382.1	LOC110690526
XM_021867404.1	LOC110690544
XM_021868311.1	LOC110691386
XM_021870788.1	LOC110693642
XM_021874940.1	LOC110697571
XM_021875197.1	LOC110697803
XM_021877052.1	LOC110699556
XM_021878602.1	LOC110701023
XM_021879551.1	LOC110701937
XM_021880794.1	LOC110703037
XM_021881599.1	LOC110703814
XM_021881727.1	LOC110703929
XM_021882454.1	LOC110704639
XM_021883445.1	LOC110705556
XM_021883579.1	LOC110705677
XM_021883627.1	LOC110705713
XM_021884339.1	LOC110706418
XM_021884817.1	LOC110706762
XM_021884935.1	LOC110706936
XM_021886388.1	LOC110708290
XM_021888576.1	LOC110710297
XM_021889421.1	LOC110711039
XM_021890360.1	LOC110711921
XM_021891997.1	LOC110713544
XM_021894367.1	LOC110715758
XM_021894948.1	LOC110716329
XM_021899612.1	LOC110720573
XM_021901492.1	LOC110722224
XM_021902386.1	LOC110723092
XM_021904430.1	LOC110724949
XM_021905417.1	LOC110725944
XM_021906184.1	LOC110726709
XM_021912769.1	LOC110732770
XM_021916556.1	LOC110736354
XM_021918837.1	LOC110738428
XM_021862933.1	LOC110686333
XM_021864692.1	LOC110688026
XM_021867383.1	LOC110690526
XM_021868847.1	LOC110691876
XM_021874942.1	LOC110697571
XM_021875189.1	LOC110697803
XM_021877047.1	LOC110699556
XM_021878603.1	LOC110701023
XM_021879546.1	LOC110701934
XM_021880792.1	LOC110703037
XM_021881728.1	LOC110703929
XM_021883581.1	LOC110705677
XM_021884338.1	LOC110706418
XM_021901494.1	LOC110722224
XM_021904428.1	LOC110724949
XM_021904438.1	LOC110724956
XM_021905207.1	LOC110725738
XM_021918834.1	LOC110738428
XM_021860088.1	LOC110683698
XM_021862929.1	LOC110686333
XM_021864691.1	LOC110688026
XM_021874941.1	LOC110697571
XM_021875206.1	LOC110697803
XM_021877053.1	LOC110699556
XM_021879545.1	LOC110701934
XM_021880793.1	LOC110703037
XM_021884891.1	LOC110706762
XM_021887630.1	LOC110709409
XM_021888577.1	LOC110710297
XM_021894949.1	LOC110716329
XM_021877048.1	LOC110699556
XM_021879544.1	LOC110701934
XM_021888578.1	LOC110710297
XM_021905206.1	LOC110725738

## Sheet: alkaline only
XM_021881631.1	LOC110703766
XM_021881751.1	LOC110703766
XM_021881575.1	LOC110703766
XM_021881844.1	LOC110703766
XM_021881887.1	LOC110703766
XM_021857955.1	LOC110681826
XM_021860657.1	LOC110684240
XM_021861725.1	LOC110685237
XM_021862675.1	LOC110686092
XM_021862940.1	LOC110686333
XM_021863533.1	LOC110686919
XM_021863548.1	LOC110686936
XM_021866222.1	LOC110689433
XM_021866782.1	LOC110689965
XM_021867384.1	LOC110690526
XM_021867403.1	LOC110690544
XM_021868312.1	LOC110691386
XM_021869718.1	LOC110692681
XM_021870202.1	LOC110693075
XM_021870575.1	LOC110693464
XM_021870789.1	LOC110693642
XM_021871804.1	LOC110694643
XM_021872930.1	LOC110695702
XM_021873594.1	LOC110696302
XM_021874932.1	LOC110697561
XM_021875178.1	LOC110697798
XM_021876288.1	LOC110698765
XM_021876426.1	LOC110698920
XM_021876729.1	LOC110699238
XM_021877437.1	LOC110699947
XM_021877550.1	LOC110700053
XM_021877881.1	LOC110700354
XM_021878554.1	LOC110700988
XM_021878604.1	LOC110701023
XM_021879550.1	LOC110701937
XM_021879878.1	LOC110702193
XM_021881600.1	LOC110703814
XM_021882865.1	LOC110705041
XM_021883446.1	LOC110705556
XM_021886386.1	LOC110708290
XM_021888555.1	LOC110710283
XM_021889412.1	LOC110711039
XM_021889619.1	LOC110711240
XM_021890249.1	LOC110711821
XM_021892663.1	LOC110714183
XM_021893196.1	LOC110714644
XM_021894193.1	LOC110715603
XM_021896367.1	LOC110717619
XM_021900841.1	LOC110721644
XM_021901208.1	LOC110721976
XM_021901493.1	LOC110722224
XM_021902385.1	LOC110723092
XM_021903005.1	LOC110723660
XM_021904434.1	LOC110724952
XM_021904791.1	LOC110725302
XM_021907183.1	LOC110727602
XM_021907748.1	LOC110728111
XM_021908155.1	LOC110728517
XM_021908323.1	LOC110728681
XM_021909638.1	LOC110729853
XM_021909979.1	LOC110730201
XM_021911388.1	LOC110731535
XM_021911394.1	LOC110731539
XM_021911750.1	LOC110731852
XM_021912474.1	LOC110732522
XM_021913218.1	LOC110733208
XM_021914082.1	LOC110734025
XM_021914403.1	LOC110734307
XM_021914710.1	LOC110734541
XM_021915346.1	LOC110735173
XM_021916555.1	LOC110736354
XM_021917625.1	LOC110737279
XM_021918063.1	LOC110737732
XM_021918797.1	LOC110738407
XM_021918899.1	LOC110738486
XM_021919419.1	LOC110738978
XM_021920154.1	LOC110739696
XM_021857956.1	LOC110681826
XM_021862676.1	LOC110686092
XM_021862925.1	LOC110686333
XM_021865473.1	LOC110688713
XM_021867382.1	LOC110690526
XM_021867404.1	LOC110690544
XM_021868311.1	LOC110691386
XM_021870788.1	LOC110693642
XM_021875197.1	LOC110697803
XM_021877549.1	LOC110700053
XM_021878602.1	LOC110701023
XM_021879551.1	LOC110701937
XM_021881599.1	LOC110703814
XM_021881727.1	LOC110703929
XM_021881803.1	LOC110703766
XM_021882864.1	LOC110705041
XM_021883445.1	LOC110705556
XM_021884935.1	LOC110706936
XM_021886388.1	LOC110708290
XM_021889421.1	LOC110711039
XM_021893197.1	LOC110714644
XM_021896366.1	LOC110717619
XM_021901492.1	LOC110722224
XM_021902386.1	LOC110723092
XM_021908156.1	LOC110728517
XM_021908976.1	LOC110729250
XM_021911384.1	LOC110731535
XM_021914404.1	LOC110734307
XM_021915345.1	LOC110735173
XM_021916556.1	LOC110736354
XM_021918064.1	LOC110737732
XM_021862933.1	LOC110686333
XM_021867383.1	LOC110690526
XM_021875189.1	LOC110697803
XM_021878556.1	LOC110700988
XM_021878603.1	LOC110701023
XM_021881685.1	LOC110703766
XM_021881728.1	LOC110703929
XM_021901494.1	LOC110722224
XM_021908977.1	LOC110729250
XM_021911387.1	LOC110731535
XM_021862929.1	LOC110686333
XM_021875206.1	LOC110697803
XM_021878553.1	LOC110700988
XM_021908157.1	LOC110728517
XM_021911385.1	LOC110731535
XM_021908154.1	LOC110728517
XM_021911386.1	LOC110731535

## Sheet: hyperosmotic only
XM_021859139.1	LOC110682797
XM_021859348.1	LOC110683013
XM_021860810.1	LOC110684358
XM_021863586.1	LOC110686961
XM_021864800.1	LOC110688113
XM_021865275.1	LOC110688512
XM_021866782.1	LOC110689965
XM_021867189.1	LOC110690371
XM_021867401.1	LOC110690542
XM_021870763.1	LOC110693621
XM_021871621.1	LOC110694450
XM_021873301.1	LOC110696037
XM_021873791.1	LOC110696497
XM_021874932.1	LOC110697561
XM_021877437.1	LOC110699947
XM_021878019.1	LOC110700466
XM_021878554.1	LOC110700988
XM_021880233.1	LOC110702513
XM_021883580.1	LOC110705677
XM_021884905.1	LOC110706915
XM_021889305.1	LOC110710965
XM_021889444.1	LOC110711068
XM_021892663.1	LOC110714183
XM_021894366.1	LOC110715758
XM_021898466.1	LOC110719513
XM_021902063.1	LOC110722769
XM_021904434.1	LOC110724952
XM_021904791.1	LOC110725302
XM_021905246.1	LOC110725775
XM_021908072.1	LOC110728420
XM_021908362.1	LOC110728719
XM_021909737.1	LOC110729935
XM_021912225.1	LOC110732304
XM_021912651.1	LOC110732680
XM_021913700.1	LOC110733630
XM_021915346.1	LOC110735173
XM_021915984.1	LOC110735801
XM_021916390.1	LOC110736224
XM_021918032.1	LOC110737698
XM_021919419.1	LOC110738978
XM_021859349.1	LOC110683013
XM_021863375.1	LOC110686771
XM_021864799.1	LOC110688113
XM_021867191.1	LOC110690371
XM_021870761.1	LOC110693621
XM_021873302.1	LOC110696037
XM_021883579.1	LOC110705677
XM_021884907.1	LOC110706915
XM_021889446.1	LOC110711068
XM_021894367.1	LOC110715758
XM_021909740.1	LOC110729935
XM_021915345.1	LOC110735173
XM_021916389.1	LOC110736224
XM_021870762.1	LOC110693621
XM_021873303.1	LOC110696037
XM_021878012.1	LOC110700466
XM_021878556.1	LOC110700988
XM_021883581.1	LOC110705677
XM_021884906.1	LOC110706915
XM_021889441.1	LOC110711068
XM_021909730.1	LOC110729935
XM_021916391.1	LOC110736224
XM_021878553.1	LOC110700988
XM_021909743.1	LOC110729935
XM_021916393.1	LOC110736224
XM_021916392.1	LOC110736224

## Sheet: saline&alkaline
XM_021860087.1	LOC110683698
XM_021860090.1	LOC110683698
XM_021860091.1	LOC110683698
XM_021860086.1	LOC110683698
XM_021888574.1	LOC110710297
XM_021888575.1	LOC110710297
XM_021858280.1	LOC110682062
XM_021858650.1	LOC110682329
XM_021859139.1	LOC110682797
XM_021859348.1	LOC110683013
XM_021859701.1	LOC110683350
XM_021859702.1	LOC110683351
XM_021860810.1	LOC110684358
XM_021864800.1	LOC110688113
XM_021865108.1	LOC110688366
XM_021867401.1	LOC110690542
XM_021868606.1	LOC110691656
XM_021870763.1	LOC110693621
XM_021872930.1	LOC110695702
XM_021873791.1	LOC110696497
XM_021874129.1	LOC110696788
XM_021877389.1	LOC110699878
XM_021878554.1	LOC110700988
XM_021879136.1	LOC110701490
XM_021882413.1	LOC110704603
XM_021882761.1	LOC110704951
XM_021882867.1	LOC110705043
XM_021885878.1	LOC110707828
XM_021886650.1	LOC110708514
XM_021888579.1	LOC110710297
XM_021889444.1	LOC110711068
XM_021890159.1	LOC110711741
XM_021890366.1	LOC110711921
XM_021893466.1	LOC110714912
XM_021894366.1	LOC110715758
XM_021897122.1	LOC110718284
XM_021900042.1	LOC110720943
XM_021900356.1	LOC110721206
XM_021901295.1	LOC110722058
XM_021902063.1	LOC110722769
XM_021904655.1	LOC110725177
XM_021906460.1	LOC110726923
XM_021906794.1	LOC110727228
XM_021906833.1	LOC110727265
XM_021907642.1	LOC110728035
XM_021908072.1	LOC110728420
XM_021908362.1	LOC110728719
XM_021909737.1	LOC110729935
XM_021912225.1	LOC110732304
XM_021912651.1	LOC110732680
XM_021912719.1	LOC110732731
XM_021912726.1	LOC110732739
XM_021913218.1	LOC110733208
XM_021913700.1	LOC110733630
XM_021914082.1	LOC110734025
XM_021916052.1	LOC110735875
XM_021917362.1	LOC110737015
XM_021920326.1	LOC110739844
XM_021858279.1	LOC110682062
XM_021859349.1	LOC110683013
XM_021860089.1	LOC110683698
XM_021864799.1	LOC110688113
XM_021870761.1	LOC110693621
XM_021882417.1	LOC110704609
XM_021888576.1	LOC110710297
XM_021889446.1	LOC110711068
XM_021890360.1	LOC110711921
XM_021894367.1	LOC110715758
XM_021906461.1	LOC110726923
XM_021907641.1	LOC110728035
XM_021909740.1	LOC110729935
XM_021920327.1	LOC110739844
XM_021870762.1	LOC110693621
XM_021878556.1	LOC110700988
XM_021888580.1	LOC110710297
XM_021889441.1	LOC110711068
XM_021906459.1	LOC110726923
XM_021909730.1	LOC110729935
XM_021860088.1	LOC110683698
XM_021878553.1	LOC110700988
XM_021888577.1	LOC110710297
XM_021909743.1	LOC110729935
XM_021888578.1	LOC110710297

## Sheet: saline&hyperosmotic
XM_021881631.1	LOC110703766
XM_021881751.1	LOC110703766
XM_021881575.1	LOC110703766
XM_021881844.1	LOC110703766
XM_021881887.1	LOC110703766
XM_021859348.1	LOC110683013
XM_021861725.1	LOC110685237
XM_021863533.1	LOC110686919
XM_021863548.1	LOC110686936
XM_021872930.1	LOC110695702
XM_021873301.1	LOC110696037
XM_021878604.1	LOC110701023
XM_021879550.1	LOC110701937
XM_021894366.1	LOC110715758
XM_021901208.1	LOC110721976
XM_021908155.1	LOC110728517
XM_021911394.1	LOC110731539
XM_021913218.1	LOC110733208
XM_021914082.1	LOC110734025
XM_021916390.1	LOC110736224
XM_021916555.1	LOC110736354
XM_021918063.1	LOC110737732
XM_021920326.1	LOC110739844
XM_021859349.1	LOC110683013
XM_021873302.1	LOC110696037
XM_021878602.1	LOC110701023
XM_021879551.1	LOC110701937
XM_021881803.1	LOC110703766
XM_021894367.1	LOC110715758
XM_021908156.1	LOC110728517
XM_021916389.1	LOC110736224
XM_021916556.1	LOC110736354
XM_021918064.1	LOC110737732
XM_021920327.1	LOC110739844
XM_021873303.1	LOC110696037
XM_021878603.1	LOC110701023
XM_021881685.1	LOC110703766
XM_021916391.1	LOC110736224
XM_021908157.1	LOC110728517
XM_021916393.1	LOC110736224
XM_021908154.1	LOC110728517
XM_021916392.1	LOC110736224

## Sheet: alkaline&hyperosmotic
XM_021860087.1	LOC110683698
XM_021860090.1	LOC110683698
XM_021860091.1	LOC110683698
XM_021860086.1	LOC110683698
XM_021888574.1	LOC110710297
XM_021888575.1	LOC110710297
XM_021858650.1	LOC110682329
XM_021862798.1	LOC110686199
XM_021863024.1	LOC110686411
XM_021864033.1	LOC110687387
XM_021870763.1	LOC110693621
XM_021871692.1	LOC110694505
XM_021881600.1	LOC110703814
XM_021882413.1	LOC110704603
XM_021882455.1	LOC110704639
XM_021883446.1	LOC110705556
XM_021883628.1	LOC110705713
XM_021884905.1	LOC110706915
XM_021885038.1	LOC110707018
XM_021886386.1	LOC110708290
XM_021890249.1	LOC110711821
XM_021891119.1	LOC110712646
XM_021894193.1	LOC110715603
XM_021897122.1	LOC110718284
XM_021902101.1	LOC110722801
XM_021907642.1	LOC110728035
XM_021908184.1	LOC110728541
XM_021909638.1	LOC110729853
XM_021911170.1	LOC110731318
XM_021912719.1	LOC110732731
XM_021912768.1	LOC110732770
XM_021917625.1	LOC110737279
XM_021860089.1	LOC110683698
XM_021864034.1	LOC110687387
XM_021870761.1	LOC110693621
XM_021881599.1	LOC110703814
XM_021882454.1	LOC110704639
XM_021883445.1	LOC110705556
XM_021883627.1	LOC110705713
XM_021884907.1	LOC110706915
XM_021885037.1	LOC110707018
XM_021886388.1	LOC110708290
XM_021888576.1	LOC110710297
XM_021907641.1	LOC110728035
XM_021911169.1	LOC110731318
XM_021912769.1	LOC110732770
XM_021915716.1	LOC110735522
XM_021870762.1	LOC110693621
XM_021884906.1	LOC110706915
XM_021885036.1	LOC110707018
XM_021915715.1	LOC110735522
XM_021860088.1	LOC110683698
XM_021888577.1	LOC110710297
XM_021891118.1	LOC110712646
XM_021915717.1	LOC110735522
XM_021888578.1	LOC110710297
XM_021915714.1	LOC110735522

## Sheet: saline&alkaline&hyperosmotic
XM_021881631.1	LOC110703766
XM_021881751.1	LOC110703766
XM_021881575.1	LOC110703766
XM_021881844.1	LOC110703766
XM_021890245.1	LOC110711816
XM_021881887.1	LOC110703766
XM_021857955.1	LOC110681826
XM_021859139.1	LOC110682797
XM_021859348.1	LOC110683013
XM_021860810.1	LOC110684358
XM_021861725.1	LOC110685237
XM_021862675.1	LOC110686092
XM_021863548.1	LOC110686936
XM_021864800.1	LOC110688113
XM_021865745.1	LOC110688997
XM_021866782.1	LOC110689965
XM_021867384.1	LOC110690526
XM_021867403.1	LOC110690544
XM_021868312.1	LOC110691386
XM_021869744.1	LOC110692706
XM_021870763.1	LOC110693621
XM_021870789.1	LOC110693642
XM_021871804.1	LOC110694643
XM_021872930.1	LOC110695702
XM_021872938.1	LOC110695711
XM_021873301.1	LOC110696037
XM_021873791.1	LOC110696497
XM_021874932.1	LOC110697561
XM_021877437.1	LOC110699947
XM_021877759.1	LOC110700251
XM_021878492.1	LOC110700926
XM_021878604.1	LOC110701023
XM_021879550.1	LOC110701937
XM_021883580.1	LOC110705677
XM_021884773.1	LOC110706816
XM_021884905.1	LOC110706915
XM_021885671.1	LOC110707647
XM_021889412.1	LOC110711039
XM_021889619.1	LOC110711240
XM_021890243.1	LOC110711816
XM_021891718.1	LOC110713262
XM_021892663.1	LOC110714183
XM_021894366.1	LOC110715758
XM_021895342.1	LOC110716698
XM_021896658.1	LOC110717874
XM_021900841.1	LOC110721644
XM_021901208.1	LOC110721976
XM_021901493.1	LOC110722224
XM_021902063.1	LOC110722769
XM_021902243.1	LOC110722970
XM_021903547.1	LOC110724157
XM_021904434.1	LOC110724952
XM_021904791.1	LOC110725302
XM_021905448.1	LOC110725970
XM_021907686.1	LOC110728069
XM_021908072.1	LOC110728420
XM_021908155.1	LOC110728517
XM_021908323.1	LOC110728681
XM_021908362.1	LOC110728719
XM_021909699.1	LOC110729908
XM_021909737.1	LOC110729935
XM_021911394.1	LOC110731539
XM_021912225.1	LOC110732304
XM_021912651.1	LOC110732680
XM_021913150.1	LOC110733127
XM_021913218.1	LOC110733208
XM_021914082.1	LOC110734025
XM_021914496.1	LOC110734364
XM_021914710.1	LOC110734541
XM_021915346.1	LOC110735173
XM_021916390.1	LOC110736224
XM_021916555.1	LOC110736354
XM_021918063.1	LOC110737732
XM_021919001.1	LOC110738608
XM_021919419.1	LOC110738978
XM_021920326.1	LOC110739844
XM_021857956.1	LOC110681826
XM_021859349.1	LOC110683013
XM_021862676.1	LOC110686092
XM_021864799.1	LOC110688113
XM_021865744.1	LOC110688997
XM_021867382.1	LOC110690526
XM_021867404.1	LOC110690544
XM_021868311.1	LOC110691386
XM_021869745.1	LOC110692706
XM_021870761.1	LOC110693621
XM_021870788.1	LOC110693642
XM_021873302.1	LOC110696037
XM_021875197.1	LOC110697803
XM_021878602.1	LOC110701023
XM_021879551.1	LOC110701937
XM_021881727.1	LOC110703929
XM_021881803.1	LOC110703766
XM_021883579.1	LOC110705677
XM_021884907.1	LOC110706915
XM_021884935.1	LOC110706936
XM_021889421.1	LOC110711039
XM_021890241.1	LOC110711816
XM_021894157.1	LOC110715573
XM_021894367.1	LOC110715758
XM_021901492.1	LOC110722224
XM_021902797.1	LOC110723438
XM_021903548.1	LOC110724157
XM_021905449.1	LOC110725970
XM_021908156.1	LOC110728517
XM_021909700.1	LOC110729908
XM_021909740.1	LOC110729935
XM_021915345.1	LOC110735173
XM_021916389.1	LOC110736224
XM_021916556.1	LOC110736354
XM_021918064.1	LOC110737732
XM_021920327.1	LOC110739844
XM_021867383.1	LOC110690526
XM_021870762.1	LOC110693621
XM_021873303.1	LOC110696037
XM_021875189.1	LOC110697803
XM_021878491.1	LOC110700926
XM_021878603.1	LOC110701023
XM_021881685.1	LOC110703766
XM_021881728.1	LOC110703929
XM_021883581.1	LOC110705677
XM_021884906.1	LOC110706915
XM_021890244.1	LOC110711816
XM_021894158.1	LOC110715573
XM_021901494.1	LOC110722224
XM_021909698.1	LOC110729908
XM_021909730.1	LOC110729935
XM_021916391.1	LOC110736224
XM_021875206.1	LOC110697803
XM_021877758.1	LOC110700251
XM_021878490.1	LOC110700926
XM_021890240.1	LOC110711816
XM_021894159.1	LOC110715573
XM_021908157.1	LOC110728517
XM_021909743.1	LOC110729935
XM_021916393.1	LOC110736224
XM_021890242.1	LOC110711816
XM_021908154.1	LOC110728517
XM_021916392.1	LOC110736224
