# Supplementary material for: Transcriptome and Small RNA Sequencing Reveals the Basis of Response to Salinity, Alkalinity and Hypertonia in Quinoa (Chenopodium quinoa Willd.)
Source: Int J Mol Sci. 2023 Jul 22;24(14):11789. doi: 10.3390/ijms241411789 (PMC10380837; doi:10.3390/ijms241411789)
Supplement: Supplementary file 1 [file ijms-24-11789-s001.zip › Tab.S11 Primer list.xls]

## Sheet: Sheet2
Gene ID	Forward primer (5'->3')	Reverse primer (5'->3')
LOC110686166	TGACAAATCGCGTTTCCCTG	ACTACACGATACGTAGTACGAACA
LOC110689782	CCATCTCATTGCCAACCCTCA	GCACCACACAGGCACATACT
LOC110691154	GTTGTGGGTCCAAGCTCAGATA	GTTTCAGTAAGCACAAACTGCTCT
LOC110694698	GAAGGGGGAGTAGAGGGAACT	AAACACCCCCTAACAGCCTC
LOC110696234	AAACACCTTCCTCTTGGCTCTT	TCATCTCATCCAGTGCATTACCAG
LOC110704424	TTGGAGAAGGCGAAATTGGATGA	AACCCCTTCGATCTGCTTAACATC
LOC110712159	TGCAGTTAAAACTCGTTCTTGGTAA	CGCGGTTACCTTTCCCTTGA
LOC110714789	GACCTTGATGCAAACAGCCG	ACTCAAAGCGATGCATATTTTGTCA
LOC110721631	ACAACCGGATTCCTTCGCTAT	GTGGTAAGACCCTTGTGGGTT
LOC110727947	TGTGGTGCACGTCTTTGTTTAG	ACATAGACACGTAGCATCTCATACA
LOC110736327	ACTCAAATCTGCTATTCTATTGCCG	CCGATACAATGGCCAGAAAACA
LOC110739966	GCTGAGCAAATGGCCTCTTC	CTTTCCTAACAAACGCAACTCCTA
CqTUB-6	TGAGAACGCAGATGAGTGTATG	GAAACGAAGACAGCAAGTGACA
